# Supplementary material for: Quantitative mapping of protein-peptide affinity landscapes using spectrally encoded beads
Source: eLife journal article supplement (doi:10.7554/elife.40499), 2019-07-08
Supplement: supp [file elife-40499-supp-v1.zip]

Archive with 71 entries (71 files):
- elife_poa_e40499_Figure_3_figure_supplement_13.jpg
- elife_poa_e40499_Figure_3_figure_supplement_10.jpg
- elife_poa_e40499_Figure_5_figure_supplement_1.jpg
- elife_poa_e40499_Figure_3_figure_supplement_5.jpg
- elife_poa_e40499_Figure_5_source_data_4.csv
- elife_poa_e40499_Figure_3_source_data_7.csv
- elife_poa_e40499_Figure_3_figure_supplement_8.jpg
- elife_poa_e40499_Figure_3_figure_supplement_4.jpg
- elife_poa_e40499_Figure_2_figure_supplement_2.jpg
- elife_poa_e40499_Figure_3_figure_supplement_14.jpg
- elife_poa_e40499_Figure_3_figure_supplement_23.jpg
- elife_poa_e40499_Figure_3_figure_supplement_7.jpg
- elife_poa_e40499_Figure_1_figure_supplement_4.eps
- elife_poa_e40499_Figure_5_source_data_3.csv
- elife_poa_e40499_Figure_3_figure_supplement_3.jpg
- elife_poa_e40499_Figure_3_source_data_8.csv
- elife_poa_e40499_Figure_5_figure_supplement_2.jpg
- elife_poa_e40499_Figure_2_figure_supplement_3.jpg
- elife_poa_e40499_Figure_4_figure_supplement_6.eps
- elife_poa_e40499_Figure_3_figure_supplement_6.jpg
- elife_poa_e40499_Transparent_Reporting_File.pdf
- elife_poa_e40499_Figure_1_figure_supplement_3.eps
- elife_poa_e40499_Figure_3_source_data_5.csv
- elife_poa_e40499_Figure_3_figure_supplement_12.jpg
- elife_poa_e40499_Figure_5_figure_supplement_3.jpg
- elife_poa_e40499_Figure_5_source_data_1.csv
- elife_poa_e40499_Figure_3_figure_supplement_22.jpg
- elife_poa_e40499_Figure_3_source_data_1.csv
- elife_poa_e40499_Figure_1_figure_supplement_1.eps
- elife_poa_e40499_Figure_4_figure_supplement_4.jpg
- elife_poa_e40499_Figure_5_figure_supplement_5.jpg
- elife_poa_e40499_Figure_5_source_data_2.csv
- elife_poa_e40499_Figure_4_figure_supplement_5.jpg
- elife_poa_e40499_Figure_4_source_data_4.csv
- elife_poa_e40499_Figure_3_source_data_3.csv
- elife_poa_e40499_Figure_2_figure_supplement_1.eps
- elife_poa_e40499_Figure_3_source_data_2.csv
- elife_poa_e40499_Figure_5_figure_supplement_4.jpg
- elife_poa_e40499_Figure_3_figure_supplement_19.jpg
- elife_poa_e40499_Figure_3_source_data_9.csv
- elife_poa_e40499_Figure_4_source_data_5.csv
- elife_poa_e40499_Figure_4_figure_supplement_7.jpg
- elife_poa_e40499_Figure_4_figure_supplement_1.jpg
- elife_poa_e40499_Figure_2_source_data_2.csv
- elife_poa_e40499_Figure_6_source_data_1.csv
- elife_poa_e40499_Figure_1_source_data_1.csv
- elife_poa_e40499_Figure_3_figure_supplement_15.jpg
- elife_poa_e40499_Figure_4_figure_supplement_3.jpg
- elife_poa_e40499_Figure_4_source_data_6.csv
- elife_poa_e40499_Figure_3_figure_supplement_18.jpg
- elife_poa_e40499_Figure_3_figure_supplement_16.jpg
- elife_poa_e40499_Figure_4_source_data_3.csv
- elife_poa_e40499_Figure_5_figure_supplement_7.jpg
- elife_poa_e40499_Figure_3_figure_supplement_20.jpg
- elife_poa_e40499_Figure_6_source_data_2.csv
- elife_poa_e40499_Figure_3_figure_supplement_9.jpg
- elife_poa_e40499_Figure_6_source_data_3.csv
- elife_poa_e40499_Figure_4_source_data_1.csv
- elife_poa_e40499_Figure_1_figure_supplement_2.eps
- elife_poa_e40499_Figure_1_source_data_2.csv
- elife_poa_e40499_Figure_3_figure_supplement_17.jpg
- elife_poa_e40499_Figure_3_figure_supplement_11.jpg
- elife_poa_e40499_Figure_3_source_data_4.csv
- elife_poa_e40499_Figure_5_figure_supplement_6.jpg
- elife_poa_e40499_Figure_3_figure_supplement_1.jpg
- elife_poa_e40499_Figure_4_figure_supplement_2.jpg
- elife_poa_e40499_Figure_3_figure_supplement_2.jpg
- elife_poa_e40499_Figure_4_source_data_2.csv
- elife_poa_e40499_Figure_3_source_data_6.csv
- elife_poa_e40499_Figure_2_source_data_1.csv
- elife_poa_e40499_Figure_3_figure_supplement_21.jpg
