# Supplementary material for: Quantitative mapping of protein-peptide affinity landscapes using spectrally encoded beads
Source: eLife journal article supplement (doi:10.7554/elife.40499), 2019-07-08
Supplement: supp [file elife-40499-supp-v1.zip › elife_poa_e40499_Figure_1_source_data_1.csv]

code	rat_dy_icp	rat_sm_icp	rat_tm_icp
0	-0.001569094	-0.002399098	-0.012623173
0	-0.001164263	0.000240476	-0.009366353
0	-0.001084565	-0.006051375	-0.008725196
0	-0.000938842	0.001765369	-0.00755287
0	-0.000890141	-0.003841959	-0.007161082
0	-0.000851722	0.000797939	-0.006852005
0	-0.00082731	-0.002190302	-0.006655609
0	-0.000681856	0.001846614	-0.00548545
0	-0.000667683	0.000546077	-0.00537143
0	-0.000653598	0.001594695	-0.00525812
0	-0.000635208	-0.003581066	-0.005110173
0	-0.000598116	0.001724581	-0.004811772
0	-0.000550695	-0.000451546	-0.004430276
0	-0.000533293	0.000547845	-0.004290275
0	-0.000507308	0.00172885	-0.004081234
0	-0.000506607	0.000851242	-0.004075589
0	-0.000480938	-0.002007954	-0.003869089
0	-0.000476596	-0.002936908	-0.003834157
0	-0.000458134	-0.001161617	-0.003685634
0	-0.000455862	0.000569301	-0.003667356
0	-0.000443137	0.002631863	-0.003564987
0	-0.000435633	0.004830886	-0.003504616
0	-0.000435323	0.002821616	-0.003502119
0	-0.000434798	-0.000669567	-0.003497902
0	-0.000416253	-0.000432538	-0.003348709
0	-0.000414727	0.000592017	-0.003336432
0	-0.000399307	0.003049232	-0.003212378
0	-0.000392064	0.000526988	-0.003154104
0	-0.000387779	0.00206661	-0.003119637
0	-0.000385087	0.002276435	-0.003097976
0	-0.00037943	0.003328535	-0.003052472
0	-0.000373188	0.000532887	-0.003002252
0	-0.000369209	0.004644248	-0.002970243
0	-0.000369063	0.001396228	-0.002969067
0	-0.000365402	-0.00425984	-0.002939619
0	-0.000364088	0.000143771	-0.002929044
0	-0.000361551	-0.000662621	-0.002908637
0	-0.000361174	0.003583299	-0.002905605
0	-0.000358766	-0.00112481	-0.002886231
0	-0.000357722	0.005415384	-0.00287783
0	-0.000355322	0.001127965	-0.002858522
0	-0.000354714	0.001581754	-0.002853633
0	-0.000341541	0.001530909	-0.002747655
0	-0.000340234	0.003165539	-0.002737138
0	-0.000334904	0.003388973	-0.002694266
0	-0.000330819	0.001367927	-0.002661396
0	-0.000327149	0.005402805	-0.002631876
0	-0.000319693	-0.000429656	-0.002571892
0	-0.000316391	0.002811652	-0.002545324
0	-0.000315414	-0.000637324	-0.002537465
0	-0.000305982	0.003711878	-0.002461592
0	-0.000300961	-0.000435416	-0.002421196
0	-0.000294187	6.69E-05	-0.002366699
0	-0.000292249	0.003232128	-0.002351111
0	-0.000287373	-0.000459543	-0.002311882
0	-0.000283879	-0.00213434	-0.00228377
0	-0.000282257	0.001566485	-0.002270723
0	-0.000280609	0.001723034	-0.002257464
0	-0.000279748	0.000318794	-0.002250536
0	-0.000278741	0.006281164	-0.002242434
0	-0.000276379	0.003321236	-0.002223435
0	-0.000275526	4.84E-05	-0.002216576
0	-0.000271287	0.002837903	-0.00218247
0	-0.000269264	-0.001755892	-0.002166195
0	-0.000262793	0.00084822	-0.002114142
0	-0.00025798	0.001764256	-0.002075419
0	-0.000256568	0.000606295	-0.002064057
0	-0.000256206	-0.001974566	-0.002061147
0	-0.000255339	-0.000659369	-0.002054174
0	-0.000254205	0.002816815	-0.002045052
0	-0.000253332	0.002168258	-0.002038026
0	-0.000252059	0.003193285	-0.002027788
0	-0.000251912	0.003902484	-0.0020266
0	-0.000249854	-0.001058437	-0.002010048
0	-0.000246527	-0.003249797	-0.001983284
0	-0.00024586	0.003041281	-0.001977913
0	-0.000245481	0.005951458	-0.001974863
0	-0.000243305	0.002348055	-0.001957363
0	-0.000231344	-0.00299033	-0.001861132
0	-0.000228983	-0.000184464	-0.001842141
0	-0.000228105	0.002850057	-0.001835074
0	-0.000227684	0.002274064	-0.001831688
0	-0.000221993	0.004933835	-0.001785907
0	-0.000220318	0.001459981	-0.00177243
0	-0.000216678	-0.004084092	-0.001743149
0	-0.000214374	0.001397006	-0.001724611
0	-0.000211879	-0.002276568	-0.001704539
0	-0.000209837	-0.002155947	-0.001688112
0	-0.000208885	0.00074847	-0.001680458
0	-0.000203844	0.002625815	-0.001639905
0	-0.000202077	0.00230767	-0.001625689
0	-0.000200664	-0.000249446	-0.001614316
0	-0.000199929	-0.005221945	-0.001608402
0	-0.000194506	0.001368722	-0.001564778
0	-0.000193918	-0.000646677	-0.001560048
0	-0.000189337	-0.001232197	-0.001523192
0	-0.000188782	0.001311417	-0.001518727
0	-0.000188577	0.003281819	-0.001517077
0	-0.000187914	-0.000432848	-0.001511747
0	-0.000184052	0.00265001	-0.001480676
0	-0.000182614	0.001178662	-0.001469111
0	-0.00018082	0.001724796	-0.001454679
0	-0.000179832	0.004352833	-0.001446729
0	-0.000179448	0.00269866	-0.001443635
0	-0.000178642	0.001228356	-0.001437155
0	-0.000177592	0.001434871	-0.001428705
0	-0.000177294	-5.03E-05	-0.001426307
0	-0.000174406	0.002320014	-0.001403077
0	-0.000172647	5.13E-05	-0.001388923
0	-0.000172391	-0.001965866	-0.001386862
0	-0.000171872	-0.000510471	-0.001382688
0	-0.000169323	0.004007081	-0.001362182
0	-0.000168743	-0.001025424	-0.001357521
0	-0.000166985	0.003781232	-0.001343374
0	-0.000165607	0.004265983	-0.001332286
0	-0.00016551	0.000960688	-0.001331509
0	-0.000162151	-0.000454797	-0.001304485
0	-0.000161765	0.002513748	-0.00130138
0	-0.000161653	-0.004027364	-0.001300483
0	-0.000159532	-0.000681378	-0.001283415
0	-0.000156143	0.002156528	-0.001256151
0	-0.000154145	0.001453714	-0.001240081
0	-0.000153327	0.001180376	-0.001233499
0	-0.000150286	-0.002670128	-0.001209034
0	-0.00014941	0.001859308	-0.001201986
0	-0.000144726	5.38E-05	-0.001164302
0	-0.000144041	0.002430413	-0.001158795
0	-0.000136685	0.002416112	-0.001099615
0	-0.000136387	0.003759787	-0.001097214
0	-0.000136123	0.003010619	-0.001095097
0	-0.000134114	0.000181686	-0.001078931
0	-0.000132681	0.000805868	-0.001067405
0	-0.000132286	0.002128118	-0.001064227
0	-0.000132003	0.003002003	-0.001061949
0	-0.000129777	-0.000884621	-0.00104404
0	-0.000127491	0.00098951	-0.001025653
0	-0.000126278	-0.000492416	-0.001015894
0	-0.000125359	-0.005617507	-0.001008496
0	-0.000124589	-0.000607688	-0.001002303
0	-0.00012233	0.002222095	-0.00098413
0	-0.000121489	0.001268138	-0.000977361
0	-0.000119701	0.000313489	-0.000962984
0	-0.000118288	0.000608106	-0.000951613
0	-0.000117249	0.00454704	-0.000943252
0	-0.00011704	0.000689952	-0.000941571
0	-0.000114169	-0.002325445	-0.000918479
0	-0.000113923	0.000178196	-0.0009165
0	-0.000113854	-0.0003349	-0.00091594
0	-0.000113317	0.000841037	-0.000911624
0	-0.00011165	0.002399388	-0.000898209
0	-0.000111484	0.001710962	-0.000896875
0	-0.000111415	-0.001412359	-0.000896318
0	-0.000110168	-0.001134134	-0.000886286
0	-0.000107987	0.001331233	-0.000868741
0	-0.000105964	0.001813384	-0.000852464
0	-0.000105819	-0.000419395	-0.000851302
0	-0.000104321	-0.003532663	-0.000839252
0	-0.000103281	-0.000632217	-0.000830881
0	-0.000103239	-0.000259273	-0.000830548
0	-0.000101506	0.000603267	-0.000816606
0	-9.85E-05	0.000403552	-0.00079264
0	-9.70E-05	0.00187444	-0.00078031
0	-9.64E-05	0.000793807	-0.000775893
0	-9.45E-05	-0.002023422	-0.000760427
0	-9.41E-05	-0.000426612	-0.000756665
0	-9.24E-05	0.001506963	-0.000743601
0	-9.20E-05	1.97E-05	-0.000740216
0	-8.25E-05	0.000255945	-0.00066407
0	-8.20E-05	0.001307222	-0.000659547
0	-8.03E-05	-0.001737049	-0.000646323
0	-8.01E-05	-1.91E-05	-0.00064476
0	-7.94E-05	0.001322263	-0.000639124
0	-7.78E-05	-0.001078126	-0.000625976
0	-7.72E-05	0.000418462	-0.000621055
0	-7.42E-05	0.005344479	-0.000596664
0	-7.28E-05	-0.00062525	-0.000585448
0	-7.17E-05	-6.90E-05	-0.000576989
0	-7.03E-05	0.002945052	-0.000565781
0	-6.92E-05	0.002443514	-0.000556723
0	-6.80E-05	-0.000307734	-0.000546715
0	-6.78E-05	0.002474557	-0.000545711
0	-6.61E-05	0.001123396	-0.000532129
0	-6.49E-05	0.001270726	-0.000522479
0	-6.17E-05	0.001167868	-0.000496662
0	-6.03E-05	0.000664111	-0.000485269
0	-5.91E-05	-0.000756156	-0.000475489
0	-5.83E-05	-0.000164509	-0.000468987
0	-5.67E-05	0.005428849	-0.000456136
0	-5.65E-05	0.003118894	-0.000454134
0	-5.64E-05	0.002634652	-0.000454084
0	-5.59E-05	0.001622482	-0.000449588
0	-5.57E-05	0.003533441	-0.000447723
0	-5.36E-05	-0.001921979	-0.000431084
0	-5.17E-05	0.001851364	-0.000415522
0	-5.05E-05	0.003738952	-0.000406177
0	-5.04E-05	-0.00242712	-0.000405829
0	-4.97E-05	0.001285125	-0.000399734
0	-4.72E-05	0.003168195	-0.00037983
0	-4.57E-05	-0.000810289	-0.000367693
0	-4.18E-05	0.001231146	-0.000336204
0	-4.17E-05	0.000772614	-0.000335822
0	-4.11E-05	0.000758611	-0.000330931
0	-3.93E-05	-0.000683819	-0.000316284
0	-3.87E-05	0.001080247	-0.000311521
0	-3.79E-05	0.000572218	-0.000305144
0	-3.52E-05	0.00396225	-0.000283261
0	-3.50E-05	-7.08E-05	-0.000281847
0	-3.48E-05	-0.000825938	-0.000279649
0	-3.16E-05	0.001841572	-0.000254591
0	-2.94E-05	0.000867117	-0.00023656
0	-2.62E-05	0.000723007	-0.000210903
0	-2.60E-05	0.003885729	-0.000209278
0	-2.60E-05	0.001872395	-0.000208837
0	-2.56E-05	0.000712406	-0.000205604
0	-2.55E-05	-0.001065898	-0.000205538
0	-2.54E-05	-0.000278089	-0.000204578
0	-2.46E-05	0.001875616	-0.000197547
0	-2.38E-05	0.002489524	-0.000191723
0	-2.18E-05	0.001602711	-0.000175525
0	-1.70E-05	0.00202683	-0.000136467
0	-1.60E-05	0.001455962	-0.000129015
0	-1.48E-05	0.001324745	-0.000118712
0	-1.47E-05	0.001170197	-0.000118152
0	-1.40E-05	0.000268349	-0.000112644
0	-1.40E-05	0.002150408	-0.000112273
0	-1.37E-05	0.001263266	-0.000110068
0	-1.11E-05	1.58E-06	-8.90E-05
0	-9.25E-06	0.00335773	-7.45E-05
0	-8.86E-06	0.003056913	-7.13E-05
0	-6.84E-06	-0.000891652	-5.50E-05
0	-6.13E-06	0.000782196	-4.93E-05
0	-6.04E-06	-0.000618409	-4.86E-05
0	-3.00E-06	0.002604598	-2.42E-05
0	-2.44E-06	0.00051841	-1.96E-05
0	-2.20E-06	0.00159872	-1.77E-05
0	-1.08E-06	-0.00059858	-8.70E-06
0	-5.05E-07	0.000308833	-4.06E-06
0	-4.24E-07	0.003995192	-3.41E-06
0	4.51E-08	0.000354582	3.63E-07
0	2.09E-07	0.002234387	1.68E-06
0	3.95E-07	-0.000228552	3.18E-06
0	1.56E-06	-0.001744245	1.26E-05
0	2.95E-06	-0.002272903	2.37E-05
0	4.90E-06	-5.44E-05	3.94E-05
0	1.07E-05	0.000467818	8.62E-05
0	1.08E-05	0.001501105	8.72E-05
0	1.09E-05	0.000952826	8.77E-05
0	1.21E-05	0.001040267	9.76E-05
0	1.22E-05	0.0004691	9.81E-05
0	1.30E-05	-0.000569341	0.000104814
0	1.33E-05	-0.001193596	0.0001073
0	1.36E-05	-0.000537432	0.000109367
0	1.37E-05	0.000822835	0.000110077
0	1.55E-05	0.002047514	0.000125093
0	1.56E-05	-0.000746215	0.000125109
0	1.76E-05	0.000339821	0.000141531
0	1.82E-05	0.000198618	0.000146581
0	1.91E-05	0.000117595	0.000153946
0	2.15E-05	0.002759275	0.000172649
0	2.47E-05	0.000873719	0.000198362
0	2.50E-05	0.000121273	0.000201431
0	2.52E-05	0.0021881	0.000202511
0	2.52E-05	0.001147916	0.000202924
0	2.53E-05	0.001541227	0.000203436
0	2.55E-05	-0.001201433	0.000205522
0	2.68E-05	-0.000910249	0.000215906
0	2.77E-05	-0.004181567	0.000222876
0	3.19E-05	-0.003141118	0.000256886
0	3.22E-05	-0.000342705	0.000259431
0	3.25E-05	0.003360378	0.00026178
0	3.31E-05	-0.001287075	0.000266214
0	3.34E-05	-0.000587913	0.000268957
0	3.45E-05	-0.001426461	0.000277332
0	3.52E-05	-0.000385394	0.000283159
0	3.77E-05	0.002447957	0.000303666
0	3.80E-05	0.000661268	0.000305862
0	3.86E-05	0.001269091	0.000310641
0	4.10E-05	-0.00342731	0.000329829
0	4.13E-05	0.000788396	0.000331933
0	4.21E-05	-0.001240528	0.000338484
0	4.30E-05	0.000183443	0.000346153
0	4.39E-05	0.001259063	0.000352866
0	4.47E-05	0.000988954	0.000359518
0	4.49E-05	0.002985219	0.000361243
0	4.49E-05	0.001626095	0.000361251
0	4.55E-05	0.000906874	0.000366058
0	4.67E-05	-0.002174045	0.000375473
0	4.76E-05	-0.002928471	0.000383077
0	4.81E-05	0.001850394	0.000387191
0	4.87E-05	0.002026664	0.000391983
0	4.90E-05	0.000901634	0.000394152
0	5.02E-05	0.002051549	0.000403889
0	5.04E-05	0.001559728	0.000405844
0	5.05E-05	-0.003183106	0.000406266
0	5.26E-05	-0.000466861	0.000423505
0	5.30E-05	0.001352721	0.000426621
0	5.33E-05	0.001799957	0.000428686
0	5.49E-05	0.003358704	0.000441509
0	5.82E-05	0.001513063	0.000468345
0	5.96E-05	-0.000711901	0.000479186
0	5.97E-05	0.001792752	0.000480174
0	5.98E-05	-0.000361434	0.000481359
0	6.04E-05	0.004350716	0.000485951
0	6.05E-05	0.003265324	0.00048702
0	6.06E-05	-0.002030888	0.000487322
0	6.19E-05	-0.000297946	0.000497899
0	6.51E-05	0.000790679	0.000523377
0	6.54E-05	0.003028274	0.000526294
0	6.58E-05	0.00085243	0.00052914
0	6.61E-05	0.000246754	0.000532094
0	6.71E-05	6.47E-06	0.000539578
0	6.80E-05	0.002938966	0.000546967
0	6.85E-05	0.004130893	0.000550869
0	6.98E-05	-0.000605662	0.000561789
0	7.03E-05	0.000673337	0.000565677
0	7.10E-05	0.002160855	0.000571341
0	7.11E-05	-0.000672836	0.000571777
0	7.36E-05	0.002164638	0.00059201
0	7.46E-05	-0.000387313	0.000599937
0	7.73E-05	-0.000820041	0.000622079
0	7.77E-05	-1.66E-05	0.000625306
0	7.82E-05	0.000134148	0.000628799
0	7.90E-05	-0.00015014	0.000635522
0	7.90E-05	0.002551399	0.000635695
0	8.24E-05	0.002674118	0.00066295
0	8.38E-05	0.002034647	0.000673913
0	8.39E-05	0.00125707	0.000675122
0	8.84E-05	0.003501019	0.000711454
0	8.86E-05	0.001354115	0.00071307
0	8.88E-05	0.001267385	0.000714044
0	8.90E-05	-0.001368781	0.000716183
0	9.22E-05	0.000810253	0.000741856
0	9.41E-05	0.000955455	0.000757392
0	9.44E-05	-0.003494513	0.000759053
0	9.48E-05	-1.44E-05	0.00076292
0	9.66E-05	0.001042152	0.000777291
0	9.67E-05	-0.001346383	0.000777941
0	0.000100412	0.001674343	0.000807802
0	0.000101151	0.001711776	0.000813746
0	0.000101337	0.004396241	0.000815243
0	0.000101441	-0.00141663	0.000816084
0	0.000101858	-0.000594938	0.000819437
0	0.000102118	-0.000117584	0.000821528
0	0.000102388	0.001373666	0.000823702
0	0.000103681	-0.001072607	0.000834102
0	0.000104526	0.001550731	0.0008409
0	0.000105123	0.000128677	0.000845705
0	0.000105441	-0.004063272	0.000848258
0	0.0001061	0.001638063	0.000853566
0	0.00010719	0.00200049	0.000862331
0	0.000107742	-0.001165239	0.000866771
0	0.000108747	-0.001819177	0.00087486
0	0.00011267	0.001780564	0.000906415
0	0.000115652	0.001530694	0.00093041
0	0.000125167	-0.000648368	0.001006952
0	0.000128283	0.002696457	0.001032023
0	0.000129286	-0.001529181	0.001040088
0	0.000133465	0.002075988	0.001073709
0	0.000133518	0.000367798	0.001074137
0	0.000138811	0.002852248	0.001116719
0	0.000141072	-0.000682234	0.001134911
0	0.000141337	0.000362242	0.001137038
0	0.000141701	0.000635338	0.001139971
0	0.000142375	-0.003700545	0.001145389
0	0.000143327	-0.004889557	0.001153052
0	0.00014334	-0.00014442	0.001153156
0	0.00014383	0.000864166	0.001157092
0	0.000146971	-0.003528451	0.001182364
0	0.000150186	-0.000783145	0.001208231
0	0.000151617	0.0040626	0.001219743
0	0.000152535	0.000383842	0.001227123
0	0.000153652	0.000946638	0.001236108
0	0.000155565	0.001699056	0.001251502
0	0.000157334	-0.002891924	0.001265733
0	0.0001577	-9.47E-05	0.001268678
0	0.00016222	0.000492706	0.001305037
0	0.000164162	0.000635845	0.001320666
0	0.000165024	0.001043964	0.001327599
0	0.000166197	0.003022287	0.001337038
0	0.000166198	-0.001476298	0.001337039
0	0.000168108	-0.000372714	0.001352408
0	0.000168245	-0.002211521	0.001353514
0	0.000169479	0.000618808	0.001363435
0	0.00017669	0.002046249	0.001421452
0	0.000176918	0.00096823	0.001423288
0	0.000177128	0.000249775	0.001424977
0	0.000177318	0.001341361	0.001426498
0	0.000178178	0.001279047	0.001433417
0	0.000178675	0.002532164	0.001437421
0	0.000179961	0.0027328	0.001447763
0	0.000180124	-0.0009596	0.001449076
0	0.000181468	0.002297494	0.001459887
0	0.000183249	-0.000945304	0.001474215
0	0.000185107	0.000681464	0.001489167
0	0.000187118	-0.001935884	0.00150534
0	0.000188582	-0.000575656	0.001517123
0	0.000188999	-0.00159333	0.001520475
0	0.000189199	0.001550414	0.00152208
0	0.000190004	0.002848757	0.001528558
0	0.00019194	-0.000502622	0.001544137
0	0.00019279	-0.001335985	0.001550974
0	0.000193352	0.000497955	0.001555497
0	0.000194915	0.003543927	0.001568071
0	0.000196271	0.002030567	0.001578976
0	0.000196628	-0.002912137	0.001581848
0	0.000198177	-0.00358201	0.001594308
0	0.00019886	-0.003339517	0.001599802
0	0.000199572	0.002006068	0.001605536
0	0.000200716	-0.000247252	0.001614735
0	0.0002026	0.00145012	0.001629889
0	0.000204741	0.001920976	0.001647114
0	0.000205547	-0.00058675	0.001653602
0	0.000206932	0.002713282	0.001664743
0	0.00020745	0.002494784	0.001668912
0	0.000209364	0.001980155	0.001684309
0	0.000211631	-0.002798558	0.001702546
0	0.000212919	-0.000642414	0.001712905
0	0.000213727	0.000774241	0.001719404
0	0.000214038	0.000507712	0.001721912
0	0.000215093	0.00249649	0.001730396
0	0.000215628	0.001003158	0.001734698
0	0.000215747	0.00045393	0.001735658
0	0.000217352	-0.003269568	0.001748572
0	0.00022063	0.001571202	0.001774943
0	0.000221239	0.00304327	0.001779839
0	0.000222634	8.63E-05	0.001791067
0	0.00022546	-0.002029228	0.001813799
0	0.000227344	-0.001471613	0.001828952
0	0.000229694	0.00031884	0.001847859
0	0.000232192	-0.002393957	0.001867958
0	0.000234637	0.001146558	0.001887628
0	0.000237279	-0.003287576	0.001908877
0	0.000239103	-0.001772092	0.001923558
0	0.000240387	-0.001788917	0.001933885
0	0.000244465	0.001600662	0.001966692
0	0.000245061	-0.003683995	0.001971486
0	0.000245424	-0.005476248	0.001974408
0	0.000245866	0.000826177	0.001977963
0	0.000246083	-0.000256094	0.001979705
0	0.000249186	-0.001077933	0.002004674
0	0.000249343	-0.000687397	0.002005936
0	0.000251417	0.00161553	0.002022616
0	0.000255401	0.001242459	0.002054672
0	0.000259566	0.000670751	0.002088176
0	0.000262	0.000885511	0.002107755
0	0.000266165	0.00177843	0.002141268
0	0.000268377	-0.001711766	0.002159063
0	0.000271989	-0.001626244	0.002188121
0	0.000272154	-0.001435156	0.002189449
0	0.000277373	-9.07E-05	0.00223143
0	0.000284366	0.0016625	0.002287694
0	0.00028497	0.000372013	0.002292552
0	0.000289603	0.002442264	0.00232982
0	0.000290143	0.000663892	0.002334165
0	0.00029073	-0.002158951	0.00233889
0	0.000291314	-0.001587679	0.002343587
0	0.000296323	-0.001168264	0.002383887
0	0.000298719	-0.004546161	0.002403156
0	0.000299779	0.001578696	0.002411684
0	0.00030123	-0.001032477	0.002423356
0	0.000302467	0.00160699	0.002433313
0	0.000305316	-0.000396705	0.002456232
0	0.000306371	0.002345923	0.002464715
0	0.000307781	0.002713689	0.00247606
0	0.000309348	-0.000763204	0.002488665
0	0.000311854	-0.000198408	0.002508827
0	0.00031446	-0.00332289	0.00252979
0	0.000315044	-0.003868732	0.002534493
0	0.000316425	-0.002278761	0.002545604
0	0.000318575	0.001831498	0.002562894
0	0.000322496	0.000726624	0.002594439
0	0.000323341	-0.002905446	0.002601236
0	0.000326128	0.000433857	0.002623662
0	0.000327033	-0.003017255	0.00263094
0	0.000327598	-0.001155693	0.002635488
0	0.000329044	-0.000903923	0.002647123
0	0.000334787	-0.002024821	0.002693323
0	0.0003351	-0.002514713	0.002695839
0	0.00033616	-0.000767217	0.002704369
0	0.000336217	-8.46E-05	0.002704823
0	0.000338641	0.003367011	0.002724325
0	0.000341405	-0.002204432	0.002746566
0	0.000343493	0.000553706	0.002763358
0	0.000344906	-0.00094417	0.002774729
0	0.000345546	-1.55E-05	0.002779875
0	0.000347108	0.000798131	0.002792445
0	0.000350372	-0.001763269	0.002818701
0	0.000352185	0.00143123	0.002833287
0	0.000355168	-0.001610911	0.002857283
0	0.000355221	-0.001075644	0.002857708
0	0.000355899	0.001931435	0.002863163
0	0.000356676	-0.001067148	0.002869412
0	0.000363613	-0.00391516	0.002925221
0	0.000366665	-0.003117792	0.002949779
0	0.000369008	0.002267371	0.002968626
0	0.000377179	-0.001002242	0.003034364
0	0.000378941	-0.001462155	0.003048536
0	0.000380559	0.000145751	0.003061551
0	0.000380566	-0.000287318	0.003061604
0	0.000381445	-0.001436957	0.003068679
0	0.000398331	-0.003061667	0.003204522
0	0.000398707	0.001535038	0.003207553
0	0.000399243	0.00088212	0.003211861
0	0.000399538	-0.002772333	0.003214235
0	0.000400166	-0.000543631	0.003219291
0	0.000400662	-0.000685856	0.003223277
0	0.000400734	-0.000499873	0.003223859
0	0.000402846	-0.003659008	0.00324085
0	0.000404974	0.000222491	0.003257969
0	0.000409169	0.000826799	0.003291713
0	0.000409578	0.001430411	0.003295008
0	0.000412661	-0.006600841	0.003319809
0	0.000413172	0.001231661	0.003323919
0	0.000414728	0.000168338	0.003336438
0	0.00042123	-0.000333863	0.003388742
0	0.000424345	-0.002216248	0.003413806
0	0.000429312	-0.002740983	0.003453761
0	0.000432172	-0.000339002	0.003476771
0	0.000443146	-0.002464153	0.003565055
0	0.000444408	-0.001352311	0.003575213
0	0.00045178	-0.003510028	0.003634515
0	0.000457403	-0.00011064	0.003679753
0	0.000459117	0.001475511	0.003693545
0	0.00046351	-0.000198516	0.003728879
0	0.000467611	0.002339272	0.003761877
0	0.000468186	-0.00039172	0.003766499
0	0.000483258	2.55E-05	0.003887752
0	0.00049035	0.000705597	0.003944805
0	0.000492264	-0.004283144	0.003960209
0	0.000496894	0.000849443	0.003997454
0	0.000497447	0.001193279	0.0040019
0	0.000497858	-0.005026799	0.004005208
0	0.000499062	-0.002380664	0.004014895
0	0.000500078	0.000344173	0.004023065
0	0.000509142	-0.002800265	0.004095986
0	0.000509901	-0.000172731	0.004102096
0	0.000511948	-0.002133522	0.004118562
0	0.000513215	-0.002946713	0.004128753
0	0.000513904	-0.001065657	0.004134297
0	0.00051914	-0.001360862	0.004176421
0	0.000519285	0.00137	0.004177583
0	0.000528452	-0.00058655	0.004251336
0	0.000565414	-0.001075035	0.004548686
0	0.000577212	-0.003422185	0.004643605
0	0.000582458	-1.53E-05	0.004685803
0	0.000584653	0.001790698	0.004703464
0	0.000616944	-0.001988016	0.004963242
0	0.000676268	-0.001199022	0.005440492
0	0.000688057	-0.000403201	0.005535335
0	0.000705127	0.001397079	0.005672662
0	0.000712193	-0.003250281	0.005729504
0	0.00077093	-0.001789685	0.006202044
0	0.000795671	-0.004785809	0.006401079
0	0.000923459	-0.000468215	0.007429115
0	0.001006556	-0.006536875	0.008097622
1	-0.002407722	0.437508927	-0.019369839
1	-0.001815865	0.444260759	-0.014608415
1	-0.001800104	0.432801557	-0.014481622
1	-0.001566501	0.461596789	-0.012602317
1	-0.00138969	0.435438578	-0.011179891
1	-0.00134358	0.410689586	-0.010808937
1	-0.001272805	0.436745511	-0.010239566
1	-0.001256681	0.429266897	-0.010109849
1	-0.00124842	0.446452524	-0.010043387
1	-0.001222136	0.419961363	-0.009831939
1	-0.001183645	0.429233738	-0.00952228
1	-0.001182195	0.428483806	-0.009510619
1	-0.001165349	0.417751008	-0.009375093
1	-0.001046305	0.442200564	-0.008417397
1	-0.001018663	0.44577622	-0.00819502
1	-0.00100795	0.435979515	-0.008108838
1	-0.000999217	0.43805143	-0.008038585
1	-0.000997875	0.426050648	-0.008027788
1	-0.000814576	0.448774891	-0.006553163
1	-0.000785246	0.437700153	-0.006317213
1	-0.000759215	0.439245616	-0.006107796
1	-0.000751051	0.43261437	-0.006042115
1	-0.000749107	0.434663247	-0.006026476
1	-0.000727081	0.445201069	-0.005849277
1	-0.00071472	0.423607201	-0.005749839
1	-0.000685058	0.431590423	-0.00551121
1	-0.000668577	0.429341932	-0.005378624
1	-0.000666606	0.443636393	-0.005362764
1	-0.00066649	0.44543834	-0.00536183
1	-0.000641937	0.434513062	-0.005164309
1	-0.000634099	0.428471222	-0.005101254
1	-0.000629665	0.445524005	-0.005065578
1	-0.000609026	0.43361471	-0.004899542
1	-0.000600616	0.457073075	-0.004831886
1	-0.000593273	0.451880595	-0.004772807
1	-0.000590031	0.440994901	-0.004746728
1	-0.000561513	0.450281856	-0.004517304
1	-0.000557903	0.436110124	-0.004488262
1	-0.000551866	0.445521845	-0.004439693
1	-0.000546535	0.452142676	-0.004396811
1	-0.000546286	0.434188768	-0.004394807
1	-0.000538256	0.446231086	-0.004330201
1	-0.000535923	0.440902178	-0.004311439
1	-0.000533556	0.439656857	-0.004292392
1	-0.000532191	0.44185935	-0.004281409
1	-0.000529454	0.448478531	-0.004259397
1	-0.000525444	0.447953648	-0.004227135
1	-0.000516615	0.443373038	-0.004156107
1	-0.000513704	0.446969595	-0.004132688
1	-0.00050758	0.447302252	-0.004083417
1	-0.000500142	0.424938182	-0.004023582
1	-0.000495461	0.432863794	-0.003985923
1	-0.000481284	0.419920437	-0.003871869
1	-0.00047924	0.4411643	-0.003855425
1	-0.00047604	0.445655896	-0.003829682
1	-0.000473662	0.45707237	-0.003810555
1	-0.000469266	0.445245291	-0.003775189
1	-0.000468447	0.448663999	-0.003768598
1	-0.000460618	0.421180569	-0.003705614
1	-0.000449798	0.444531952	-0.003618568
1	-0.000428427	0.445605793	-0.003446646
1	-0.000421184	0.427682707	-0.003388375
1	-0.000419924	0.407200617	-0.003378239
1	-0.000417201	0.430534356	-0.003356335
1	-0.000415605	0.45602585	-0.003343495
1	-0.000407162	0.441095088	-0.003275568
1	-0.0004056	0.441613341	-0.003263
1	-0.000404889	0.445878725	-0.003257287
1	-0.000403295	0.445012814	-0.003244463
1	-0.000394441	0.442633373	-0.003173234
1	-0.000393623	0.424702841	-0.003166648
1	-0.000392691	0.44947255	-0.003159151
1	-0.000392049	0.440555308	-0.003153984
1	-0.000390974	0.434772788	-0.003145341
1	-0.000387431	0.436850781	-0.003116838
1	-0.000374096	0.448608772	-0.003009555
1	-0.000368393	0.439742822	-0.002963677
1	-0.00036617	0.45268167	-0.002945797
1	-0.000365889	0.42085751	-0.002943532
1	-0.000361417	0.439620576	-0.002907558
1	-0.000361274	0.428927909	-0.002906403
1	-0.000351773	0.443705774	-0.002829974
1	-0.000341267	0.444660852	-0.002745454
1	-0.000334663	0.446987505	-0.00269232
1	-0.000333191	0.438375196	-0.002680484
1	-0.000332111	0.444570704	-0.002671792
1	-0.00033176	0.431636718	-0.002668966
1	-0.000328266	0.431922152	-0.002640863
1	-0.000327542	0.440674778	-0.002635037
1	-0.00032194	0.444578649	-0.002589972
1	-0.000318298	0.444682369	-0.002560672
1	-0.000316437	0.430365347	-0.002545696
1	-0.000316122	0.436577564	-0.002543166
1	-0.000304937	0.431676449	-0.002453182
1	-0.000303034	0.438672965	-0.00243787
1	-0.00030018	0.446201659	-0.00241491
1	-0.000299704	0.443850348	-0.002411085
1	-0.000295548	0.433781357	-0.002377646
1	-0.000292339	0.447821995	-0.00235183
1	-0.000289836	0.449293114	-0.002331693
1	-0.000289263	0.42185471	-0.002327084
1	-0.000287771	0.451025565	-0.00231508
1	-0.000283006	0.433076957	-0.002276751
1	-0.000282011	0.436730853	-0.002268743
1	-0.000278121	0.447904303	-0.002237448
1	-0.000277774	0.418478199	-0.002234658
1	-0.000269197	0.446928213	-0.002165654
1	-0.000266832	0.442016319	-0.00214663
1	-0.000265781	0.441393582	-0.002138174
1	-0.000263392	0.450828478	-0.002118955
1	-0.000263167	0.421715775	-0.002117143
1	-0.000263068	0.447026235	-0.002116351
1	-0.000256885	0.449550108	-0.002066609
1	-0.000255205	0.431069457	-0.002053094
1	-0.000253926	0.447022859	-0.002042808
1	-0.000248564	0.418561816	-0.00199967
1	-0.000247271	0.443596386	-0.001989269
1	-0.000246194	0.423052639	-0.001980599
1	-0.000244931	0.452026339	-0.001970442
1	-0.000242897	0.442237443	-0.001954078
1	-0.000240463	0.434110855	-0.001934497
1	-0.000238016	0.447797446	-0.001914813
1	-0.000228036	0.435534823	-0.001834526
1	-0.000224667	0.450009884	-0.001807416
1	-0.000221629	0.448472302	-0.001782975
1	-0.000221371	0.43941162	-0.001780903
1	-0.000219388	0.440994272	-0.001764952
1	-0.000218897	0.443154127	-0.001760997
1	-0.00021838	0.437504226	-0.001756841
1	-0.000213307	0.442422243	-0.001716032
1	-0.000207336	0.440195105	-0.001667994
1	-0.00020726	0.444792374	-0.001667379
1	-0.000204387	0.428819609	-0.001644268
1	-0.000200201	0.444938924	-0.001610595
1	-0.000200004	0.451247971	-0.001609006
1	-0.000194868	0.429912156	-0.001567687
1	-0.000192393	0.431311787	-0.00154778
1	-0.000190653	0.447196616	-0.001533784
1	-0.000190254	0.449618849	-0.001530571
1	-0.00018967	0.451505338	-0.00152587
1	-0.000189503	0.441983412	-0.00152453
1	-0.000187617	0.425683858	-0.00150936
1	-0.000184704	0.442081488	-0.001485925
1	-0.000179379	0.439371685	-0.001443081
1	-0.000177542	0.439063598	-0.001428302
1	-0.000173039	0.44343099	-0.001392078
1	-0.000172781	0.440058964	-0.001390003
1	-0.000172143	0.438042093	-0.001384866
1	-0.00017139	0.448883374	-0.001378814
1	-0.000171083	0.441310591	-0.001376345
1	-0.000161721	0.450643755	-0.001301026
1	-0.000161604	0.44492555	-0.001300086
1	-0.00016034	0.431470362	-0.001289919
1	-0.000154092	0.453104234	-0.001239655
1	-0.000150069	0.444798937	-0.001207285
1	-0.000146476	0.45835613	-0.001178378
1	-0.000146254	0.440401312	-0.001176595
1	-0.000142675	0.447621271	-0.001147806
1	-0.00014212	0.437564645	-0.001143337
1	-0.000139802	0.414704143	-0.00112469
1	-0.000138118	0.447364845	-0.001111144
1	-0.000136026	0.450863036	-0.001094317
1	-0.000134271	0.443336056	-0.001080194
1	-0.00013376	0.444055805	-0.001076082
1	-0.00013082	0.453330826	-0.001052433
1	-0.000125676	0.446525111	-0.001011047
1	-0.000125007	0.442751208	-0.001005666
1	-0.000122799	0.416946928	-0.000987903
1	-0.000122381	0.430201433	-0.000984542
1	-0.000119211	0.445931951	-0.000959038
1	-0.000116642	0.443661602	-0.000938374
1	-0.000114465	0.433311155	-0.00092086
1	-0.000112826	0.435227041	-0.000907672
1	-0.000112552	0.444182242	-0.000905464
1	-0.000111801	0.448838108	-0.000899429
1	-0.000111042	0.439102254	-0.000893318
1	-0.00011037	0.448044673	-0.000887911
1	-0.000108731	0.446249226	-0.000874727
1	-0.000103504	0.439511705	-0.00083268
1	-0.000102056	0.422942963	-0.000821026
1	-0.000101717	0.447995609	-0.0008183
1	-9.96E-05	0.41144157	-0.000801267
1	-9.79E-05	0.439303702	-0.000787415
1	-9.70E-05	0.429418098	-0.000780449
1	-9.21E-05	0.428147009	-0.000740635
1	-9.10E-05	0.443553113	-0.000731963
1	-9.09E-05	0.440562854	-0.00073128
1	-8.82E-05	0.452107259	-0.000709443
1	-8.79E-05	0.435358469	-0.000706746
1	-8.64E-05	0.440499899	-0.000695292
1	-8.63E-05	0.442582351	-0.000694559
1	-8.51E-05	0.413015641	-0.000684809
1	-8.41E-05	0.438569189	-0.000676887
1	-8.15E-05	0.442909719	-0.000655428
1	-8.07E-05	0.414050404	-0.000649379
1	-7.83E-05	0.433244004	-0.000629741
1	-7.76E-05	0.429892103	-0.000624166
1	-7.26E-05	0.435642534	-0.00058421
1	-7.22E-05	0.444189564	-0.000580859
1	-7.18E-05	0.443844427	-0.000577232
1	-7.01E-05	0.439835823	-0.000563823
1	-6.57E-05	0.442877953	-0.000528448
1	-5.90E-05	0.450451667	-0.000474511
1	-5.71E-05	0.445828728	-0.000459338
1	-5.63E-05	0.429696393	-0.00045257
1	-4.82E-05	0.428651985	-0.000387827
1	-4.69E-05	0.444583685	-0.000377522
1	-4.34E-05	0.443020942	-0.000348904
1	-4.24E-05	0.435436763	-0.000340868
1	-3.74E-05	0.44512436	-0.000301261
1	-3.61E-05	0.42509491	-0.000290298
1	-3.52E-05	0.432166483	-0.000283192
1	-2.93E-05	0.443032216	-0.000235319
1	-2.45E-05	0.441650161	-0.000197335
1	-2.40E-05	0.446356708	-0.000192777
1	-2.33E-05	0.44574654	-0.000187384
1	-2.08E-05	0.446437867	-0.000167626
1	-1.92E-05	0.436942097	-0.000154352
1	-1.84E-05	0.43521559	-0.00014784
1	-1.77E-05	0.436877611	-0.00014231
1	-1.61E-05	0.448699201	-0.000129313
1	-1.53E-05	0.447187839	-0.000123047
1	-1.38E-05	0.42988481	-0.000110913
1	-1.22E-05	0.445381846	-9.85E-05
1	-1.12E-05	0.43144681	-9.01E-05
1	-8.36E-06	0.421829654	-6.73E-05
1	-3.70E-06	0.43794666	-2.98E-05
1	-2.80E-06	0.437373572	-2.25E-05
1	-1.69E-06	0.436838209	-1.36E-05
1	4.62E-07	0.42461832	3.72E-06
1	6.86E-06	0.412745685	5.52E-05
1	1.00E-05	0.439113543	8.07E-05
1	1.29E-05	0.440455801	0.000103614
1	1.45E-05	0.445762073	0.000116724
1	1.51E-05	0.438054753	0.000121565
1	1.52E-05	0.449362146	0.000122169
1	1.62E-05	0.418757347	0.000130249
1	1.99E-05	0.448022616	0.000159995
1	2.31E-05	0.444880757	0.000186089
1	2.68E-05	0.43944129	0.000215222
1	2.90E-05	0.443615905	0.00023359
1	2.92E-05	0.441730245	0.000235265
1	3.12E-05	0.428785403	0.000250919
1	3.18E-05	0.424142898	0.000255648
1	3.39E-05	0.451427466	0.00027233
1	3.56E-05	0.443572479	0.000286763
1	3.58E-05	0.438487818	0.000288099
1	3.67E-05	0.429479211	0.000294988
1	3.67E-05	0.445139862	0.000295132
1	3.70E-05	0.43597279	0.000297341
1	3.77E-05	0.444106594	0.000303568
1	3.83E-05	0.452260318	0.000308162
1	3.83E-05	0.434009087	0.000308261
1	3.85E-05	0.436051636	0.000310073
1	4.08E-05	0.440806514	0.000328057
1	4.42E-05	0.4303056	0.000355513
1	4.62E-05	0.432508736	0.000372067
1	4.68E-05	0.430770807	0.0003762
1	4.69E-05	0.432468127	0.000377056
1	4.72E-05	0.413123586	0.000380061
1	5.54E-05	0.445261265	0.000445692
1	5.60E-05	0.441516474	0.00045076
1	5.62E-05	0.446715834	0.000452128
1	5.86E-05	0.446693734	0.000471728
1	6.20E-05	0.440287221	0.000499134
1	6.32E-05	0.445982043	0.000508211
1	6.41E-05	0.438144135	0.000515278
1	6.42E-05	0.435409691	0.000516689
1	6.55E-05	0.430010665	0.000526956
1	6.70E-05	0.433379655	0.000539156
1	6.73E-05	0.419938152	0.000541262
1	6.90E-05	0.422991447	0.000554945
1	7.28E-05	0.440218576	0.000585822
1	7.35E-05	0.438867384	0.000591419
1	7.36E-05	0.446929492	0.000592203
1	7.40E-05	0.437107167	0.000595478
1	7.44E-05	0.428155072	0.00059846
1	7.64E-05	0.4459642	0.000614761
1	7.68E-05	0.437524759	0.000617912
1	7.73E-05	0.447329635	0.000621964
1	8.26E-05	0.44763753	0.000664698
1	8.47E-05	0.430896952	0.000681113
1	8.59E-05	0.412330824	0.000690759
1	8.68E-05	0.445510681	0.000698444
1	9.09E-05	0.443305737	0.000730903
1	9.58E-05	0.434302986	0.000770711
1	9.65E-05	0.425992003	0.000776724
1	9.76E-05	0.443267153	0.000785227
1	9.83E-05	0.443656785	0.000790497
1	0.000108573	0.440055493	0.000873459
1	0.000108637	0.480743909	0.000873971
1	0.000110173	0.443232358	0.000886331
1	0.000113895	0.437680734	0.00091627
1	0.000114667	0.4488704	0.000922481
1	0.000116834	0.439432202	0.000939915
1	0.000117141	0.438119027	0.000942389
1	0.000118004	0.441849914	0.000949326
1	0.000121843	0.441092928	0.000980213
1	0.000122928	0.450741827	0.000988937
1	0.000127472	0.430682468	0.001025493
1	0.000127624	0.443926072	0.001026724
1	0.000132746	0.433258476	0.001067923
1	0.000133772	0.47949714	0.001076178
1	0.00013389	0.43102216	0.001077127
1	0.000137446	0.44527935	0.001105737
1	0.000137656	0.42870602	0.001107428
1	0.000138822	0.439201451	0.00111681
1	0.000140853	0.459539356	0.001133145
1	0.000142846	0.436890177	0.00114918
1	0.000145883	0.443472174	0.001173609
1	0.000147171	0.439772398	0.001183975
1	0.0001478	0.420768069	0.001189034
1	0.000147807	0.442027223	0.001189088
1	0.000147844	0.444427236	0.001189384
1	0.000149639	0.441762052	0.001203829
1	0.00015085	0.430735578	0.001213572
1	0.000151331	0.446616994	0.001217442
1	0.000152511	0.439514991	0.001226935
1	0.000158326	0.433421004	0.00127371
1	0.00015994	0.432909227	0.001286702
1	0.00016087	0.446834285	0.00129418
1	0.000162737	0.438352003	0.001309203
1	0.000163059	0.45106212	0.001311789
1	0.000165306	0.446972988	0.001329868
1	0.000166534	0.447734361	0.00133975
1	0.000170508	0.431726344	0.001371718
1	0.000172749	0.446537968	0.001389746
1	0.000175969	0.428363075	0.001415652
1	0.000178975	0.442188858	0.001439832
1	0.000180393	0.435603133	0.00145124
1	0.000180774	0.445926376	0.001454303
1	0.000183031	0.419405852	0.001472463
1	0.000183523	0.440562203	0.001476421
1	0.000184281	0.434550329	0.00148252
1	0.000188527	0.452009557	0.001516675
1	0.000193262	0.434158886	0.001554771
1	0.000193953	0.40760424	0.001560332
1	0.00019492	0.447724531	0.001568108
1	0.000197591	0.437533041	0.001589593
1	0.000198329	0.440137805	0.00159553
1	0.000198413	0.421570096	0.001596206
1	0.000201274	0.44375548	0.001619226
1	0.000206593	0.430836112	0.001662014
1	0.00020722	0.428253078	0.001667063
1	0.000209632	0.455411008	0.001686462
1	0.000212677	0.434104065	0.001710958
1	0.000212954	0.4408479	0.001713186
1	0.000213473	0.431342115	0.001717364
1	0.000216306	0.417609468	0.001740158
1	0.000217432	0.435831191	0.001749214
1	0.000218632	0.441000665	0.00175887
1	0.0002189	0.431099811	0.001761023
1	0.000219707	0.431546729	0.00176752
1	0.000221213	0.437666847	0.001779629
1	0.000221288	0.435438332	0.001780232
1	0.000222979	0.419660496	0.001793837
1	0.000225126	0.435202319	0.001811115
1	0.000229589	0.436915394	0.001847013
1	0.000233106	0.456556053	0.001875308
1	0.00023327	0.440732835	0.00187663
1	0.000233571	0.436212789	0.001879049
1	0.000233653	0.436102015	0.001879707
1	0.000235342	0.428547867	0.001893295
1	0.000236783	0.426510839	0.001904891
1	0.000237221	0.431706435	0.001908412
1	0.000240139	0.432605892	0.001931889
1	0.0002424	0.438675805	0.001950076
1	0.000245318	0.455761793	0.001973554
1	0.000245439	0.438652921	0.001974529
1	0.00024575	0.434315799	0.001977026
1	0.000247168	0.434264036	0.00198844
1	0.000248305	0.435598449	0.001997581
1	0.000250933	0.428220512	0.002018729
1	0.000252693	0.426419436	0.002032886
1	0.000253696	0.429293957	0.002040953
1	0.000256305	0.44503085	0.002061947
1	0.000256565	0.430447999	0.002064037
1	0.000257991	0.432253503	0.002075504
1	0.000258764	0.447725557	0.002081725
1	0.00025894	0.444296566	0.002083141
1	0.000260769	0.443515524	0.002097856
1	0.000265243	0.432934251	0.002133852
1	0.000269548	0.441553334	0.002168485
1	0.000275055	0.441595843	0.002212787
1	0.000275942	0.434432779	0.002219919
1	0.000277364	0.43298904	0.00223136
1	0.000281125	0.438631133	0.002261614
1	0.000283481	0.442267963	0.00228057
1	0.000284904	0.435440981	0.002292018
1	0.000285644	0.422886462	0.002297971
1	0.000287381	0.431697299	0.002311942
1	0.000289454	0.434040034	0.002328625
1	0.00028972	0.433959272	0.002330763
1	0.00029085	0.436634917	0.002339856
1	0.000294192	0.43479504	0.002366743
1	0.000295652	0.442278947	0.002378487
1	0.000295662	0.420930517	0.002378568
1	0.000299172	0.440205211	0.002406805
1	0.000299588	0.431250487	0.002410153
1	0.000300424	0.428572417	0.002416874
1	0.000302929	0.436065381	0.002437029
1	0.000305764	0.43001929	0.002459832
1	0.000310243	0.430019421	0.002495866
1	0.000313364	0.437056521	0.002520976
1	0.000317244	0.437589588	0.00255219
1	0.000322509	0.448763257	0.002594547
1	0.000326442	0.449806971	0.002626186
1	0.000329284	0.43167624	0.002649052
1	0.000329579	0.449385096	0.002651425
1	0.000330568	0.438938138	0.002659376
1	0.000335404	0.438285129	0.002698284
1	0.000335764	0.442461242	0.002701181
1	0.000336497	0.446952652	0.002707074
1	0.000340141	0.430590636	0.002736396
1	0.000340651	0.41399926	0.002740498
1	0.000341938	0.442639591	0.002750848
1	0.000342388	0.435191735	0.002754472
1	0.000343397	0.407587709	0.002762586
1	0.000344295	0.434851565	0.002769815
1	0.00034456	0.449284174	0.002771941
1	0.000344678	0.447202874	0.002772891
1	0.000345731	0.421283697	0.002781366
1	0.000352339	0.435756003	0.002834529
1	0.000354239	0.422780213	0.002849812
1	0.000354523	0.448619001	0.002852091
1	0.000364935	0.43157758	0.00293586
1	0.000366004	0.420274166	0.002944455
1	0.000369142	0.426451353	0.0029697
1	0.00036971	0.442680004	0.002974272
1	0.000374854	0.426011191	0.003015655
1	0.000374915	0.449258559	0.003016148
1	0.000380958	0.442363419	0.003064759
1	0.000384295	0.444934773	0.00309161
1	0.000384485	0.440218728	0.003093133
1	0.000384506	0.439120614	0.003093308
1	0.000385667	0.436956163	0.003102648
1	0.000387381	0.427371731	0.003116434
1	0.000389179	0.443334805	0.003130902
1	0.000391108	0.445094343	0.003146418
1	0.000392866	0.439637494	0.003160562
1	0.000404063	0.432576313	0.003250642
1	0.000405384	0.432820613	0.003261268
1	0.000407043	0.433540392	0.003274616
1	0.000409126	0.442689774	0.003291371
1	0.00040997	0.438396175	0.00329816
1	0.000418142	0.438966204	0.003363903
1	0.000420707	0.427363216	0.003384534
1	0.000424786	0.448439563	0.00341735
1	0.000428852	0.432662281	0.00345006
1	0.000429801	0.428569873	0.003457694
1	0.000431661	0.439366566	0.003472662
1	0.000431989	0.43271468	0.003475297
1	0.000432723	0.436240984	0.003481202
1	0.000434439	0.445631961	0.003495013
1	0.000438855	0.43084762	0.003530536
1	0.000443742	0.451723104	0.003569853
1	0.000443874	0.424385783	0.003570913
1	0.000444682	0.427652115	0.00357741
1	0.000446222	0.441104935	0.003589801
1	0.000452045	0.43400302	0.003636651
1	0.000458471	0.430144752	0.003688348
1	0.000458938	0.419580456	0.003692103
1	0.000463989	0.433151219	0.003732732
1	0.000465393	0.446287001	0.003744027
1	0.000469861	0.428086835	0.003779978
1	0.000472167	0.405744695	0.003798524
1	0.000480364	0.425355412	0.003864473
1	0.000481947	0.423090006	0.003877202
1	0.000485662	0.425795039	0.003907092
1	0.000491458	0.431214434	0.003953719
1	0.000494102	0.437552465	0.003974992
1	0.00049419	0.405096134	0.003975696
1	0.00050687	0.439654293	0.004077705
1	0.000508925	0.440168104	0.004094243
1	0.000517309	0.446791901	0.004161686
1	0.000519958	0.443424677	0.004183002
1	0.000523749	0.436996195	0.004213494
1	0.000538188	0.439863647	0.004329655
1	0.000538919	0.439897527	0.00433554
1	0.000545589	0.430534762	0.004389196
1	0.000547518	0.435468226	0.004404718
1	0.0005477	0.407743173	0.004406179
1	0.000556175	0.436352164	0.004474362
1	0.0005581	0.436207629	0.00448985
1	0.000561023	0.428715701	0.004513361
1	0.000562458	0.435791076	0.004524911
1	0.000562872	0.431146683	0.004528241
1	0.000565058	0.449880471	0.004545821
1	0.00056635	0.430975189	0.004556219
1	0.000571728	0.443349152	0.004599481
1	0.000573918	0.421109704	0.004617098
1	0.000574654	0.430088682	0.004623019
1	0.00057752	0.43887564	0.004646083
1	0.000579284	0.427800211	0.004660274
1	0.000580522	0.443034226	0.004670232
1	0.000582525	0.44543004	0.004686346
1	0.000583889	0.44522092	0.00469732
1	0.000586905	0.433048565	0.004721579
1	0.000588525	0.424905005	0.004734612
1	0.000593008	0.437234898	0.004770677
1	0.000594547	0.423477413	0.004783059
1	0.000605019	0.441042558	0.004867308
1	0.000609425	0.434910358	0.004902751
1	0.00061189	0.428109512	0.004922583
1	0.000619585	0.447187455	0.004984484
1	0.000620241	0.437138011	0.004989764
1	0.000635081	0.410918881	0.00510915
1	0.000641678	0.447019451	0.005162221
1	0.000642402	0.433868374	0.005168047
1	0.000676684	0.436412235	0.005443843
1	0.000680771	0.432586915	0.005476725
1	0.000681685	0.441015997	0.005484078
1	0.000687348	0.425332207	0.005529636
1	0.000712558	0.430279659	0.005732448
1	0.000717528	0.428848351	0.005772428
1	0.000726738	0.446903374	0.005846523
1	0.00073701	0.421016636	0.005929158
1	0.000765082	0.436511256	0.006154991
1	0.000768629	0.444718157	0.006183528
1	0.000840085	0.440450032	0.006758386
1	0.000845989	0.436898885	0.006805878
1	0.000861652	0.421570709	0.006931885
1	0.000918104	0.429458203	0.007386039
1	0.000931083	0.4204168	0.007490448
1	0.000974012	0.410306701	0.007835812
1	0.001105589	0.426166608	0.008894328
1	0.001185021	0.436321416	0.009533351
1	0.00119832	0.429080728	0.009640337
1	0.00120821	0.422764757	0.009719906
1	0.001273805	0.422534395	0.010247607
1	0.001282594	0.442719139	0.010318313
1	0.001335288	0.393677263	0.010742233
1	0.002444854	0.418015195	0.019668559
2	0.074691536	0.094771096	0.60088448
2	0.075110202	0.109573928	0.604252593
2	0.076600419	0.101857871	0.616241209
2	0.076879846	0.111923273	0.61848917
2	0.077241154	0.105476783	0.621395852
2	0.077251585	0.117426282	0.621479767
2	0.077283356	0.097943403	0.621735361
2	0.077298666	0.11215638	0.621858523
2	0.077346137	0.094992343	0.622240426
2	0.077478516	0.102995952	0.623305396
2	0.077640864	0.108874409	0.624611472
2	0.077722697	0.103382341	0.625269808
2	0.07773903	0.105141302	0.6254012
2	0.077860902	0.108488486	0.626381645
2	0.077888741	0.109406324	0.626605605
2	0.07795192	0.103175682	0.627113874
2	0.078038663	0.11344298	0.627811715
2	0.078054405	0.096190841	0.627938357
2	0.07810174	0.113922529	0.628319161
2	0.078102181	0.105972909	0.628322712
2	0.078143856	0.116315337	0.628657979
2	0.0781964	0.101931	0.629080689
2	0.078216698	0.108109675	0.629243984
2	0.078225952	0.107115785	0.629318429
2	0.078266857	0.110160832	0.629647506
2	0.078316942	0.10510627	0.630050433
2	0.078346475	0.110403951	0.630288026
2	0.078397085	0.103635376	0.630695179
2	0.078404021	0.107520171	0.630750977
2	0.07840855	0.108502276	0.630787413
2	0.078411493	0.110697144	0.630811085
2	0.078415411	0.108436426	0.630842603
2	0.078424928	0.109537067	0.630919166
2	0.078532783	0.107115225	0.631786853
2	0.078577775	0.110109621	0.632148802
2	0.078606813	0.100308484	0.632382415
2	0.078667063	0.110059087	0.632867114
2	0.07867856	0.106645847	0.632959605
2	0.078706262	0.102173798	0.633182467
2	0.078716122	0.106492864	0.633261792
2	0.078735362	0.103750232	0.633416574
2	0.078742092	0.109049727	0.633470718
2	0.078756809	0.107117204	0.633589116
2	0.078766659	0.112321516	0.633668352
2	0.078775074	0.106682919	0.633736054
2	0.078783217	0.1089718	0.633801564
2	0.078797626	0.107476732	0.633917481
2	0.078803234	0.110100053	0.633962595
2	0.07884937	0.115352498	0.634333754
2	0.078869096	0.111181085	0.63449245
2	0.078874615	0.11411055	0.634536851
2	0.078884495	0.105709154	0.634616332
2	0.078893562	0.112823025	0.634689271
2	0.078929699	0.115126493	0.634979992
2	0.078970127	0.112628972	0.635305227
2	0.078998157	0.10806627	0.635530727
2	0.079020385	0.107075148	0.635709546
2	0.079025355	0.101438132	0.635749531
2	0.079034926	0.102691427	0.635826528
2	0.079047284	0.102893139	0.635925952
2	0.079050262	0.106864771	0.635949907
2	0.079113264	0.113293063	0.63645675
2	0.079153642	0.103985417	0.636781583
2	0.079154996	0.119385001	0.636792478
2	0.07916351	0.110769592	0.63686097
2	0.079193	0.107184062	0.637098214
2	0.079196786	0.112082043	0.637128673
2	0.079214086	0.113185077	0.63726785
2	0.079225041	0.11049535	0.637355984
2	0.079234249	0.103803956	0.637430056
2	0.079241968	0.11042619	0.637492156
2	0.079242751	0.10829185	0.637498455
2	0.079260408	0.109495274	0.637640504
2	0.079265484	0.11243161	0.637681344
2	0.079275562	0.112475981	0.637762416
2	0.079285123	0.112926621	0.637839337
2	0.079286919	0.100204624	0.637853785
2	0.079294558	0.103823728	0.637915242
2	0.079303153	0.098677262	0.637984387
2	0.079319316	0.102300854	0.638114412
2	0.079354589	0.110445709	0.638398177
2	0.07936787	0.099177089	0.638505022
2	0.079370638	0.103520107	0.638527291
2	0.079375423	0.109696905	0.638565788
2	0.079381878	0.11524848	0.638617722
2	0.079387541	0.109972966	0.638663277
2	0.079396924	0.115830329	0.63873876
2	0.079399619	0.110038094	0.638760445
2	0.079408216	0.10801546	0.638829603
2	0.079422139	0.099433314	0.638941613
2	0.079446999	0.100918181	0.639141611
2	0.079518252	0.109363228	0.639714832
2	0.07952237	0.108510039	0.639747962
2	0.079557083	0.107189654	0.640027221
2	0.079562746	0.115236705	0.640072776
2	0.079565705	0.102848711	0.640096588
2	0.079574295	0.089081512	0.640165688
2	0.079613798	0.103189543	0.64048349
2	0.079618455	0.104887251	0.640520952
2	0.079631026	0.100603224	0.640622081
2	0.07963343	0.109187093	0.640641424
2	0.079642999	0.110133898	0.640718403
2	0.079644624	0.106847857	0.640731479
2	0.079650322	0.108576424	0.640777322
2	0.079661229	0.105748754	0.640865061
2	0.079666904	0.109925827	0.64091072
2	0.079673677	0.106716923	0.640965207
2	0.079680708	0.107775597	0.641021771
2	0.079686732	0.106809588	0.641070231
2	0.079696677	0.104872732	0.641150238
2	0.079704566	0.114194956	0.641213708
2	0.079746501	0.10801177	0.641551068
2	0.079751901	0.112956489	0.641594507
2	0.079752735	0.106509188	0.64160122
2	0.079755882	0.109519584	0.641626536
2	0.079769417	0.103325069	0.641735421
2	0.079774908	0.111674819	0.641779597
2	0.079808541	0.103703993	0.642050171
2	0.079815252	0.108057633	0.642104162
2	0.079824411	0.107997846	0.642177845
2	0.079863118	0.107162142	0.642489232
2	0.079884108	0.113956827	0.642658096
2	0.079901251	0.10625023	0.642796007
2	0.079904489	0.106700099	0.642822057
2	0.079909956	0.109484342	0.642866042
2	0.079916623	0.110417218	0.642919681
2	0.079917162	0.111214677	0.642924011
2	0.079919321	0.103581435	0.642941382
2	0.079920832	0.110252343	0.642953542
2	0.079933191	0.105865135	0.643052967
2	0.079936019	0.104588148	0.643075715
2	0.079936731	0.1120738	0.643081444
2	0.079940809	0.11580264	0.64311425
2	0.079950051	0.112325735	0.643188598
2	0.079951358	0.109899447	0.643199116
2	0.079953504	0.109026356	0.643216382
2	0.079971144	0.103964393	0.643358293
2	0.07998971	0.101644732	0.64350765
2	0.079991526	0.107053479	0.643522264
2	0.080010298	0.109320008	0.643673281
2	0.080013818	0.110004753	0.6437016
2	0.080018189	0.107818034	0.64373676
2	0.080023292	0.106413689	0.643777814
2	0.080030591	0.108549527	0.643836534
2	0.080036146	0.108786071	0.643881226
2	0.080039876	0.110955041	0.643911231
2	0.080047605	0.106564591	0.643973408
2	0.080055612	0.110511882	0.644037824
2	0.080072425	0.105908447	0.644173084
2	0.080085306	0.114198423	0.644276711
2	0.080092751	0.104524663	0.644336605
2	0.080111996	0.103522679	0.644491427
2	0.080119862	0.108691686	0.644554714
2	0.080122372	0.110332827	0.644574907
2	0.08013079	0.106860174	0.644642623
2	0.080131033	0.10070393	0.64464458
2	0.08014634	0.114575355	0.644767724
2	0.080152717	0.102119039	0.644819022
2	0.080160482	0.10995635	0.644881497
2	0.080205293	0.106150669	0.645241991
2	0.080209559	0.10836514	0.645276311
2	0.080213437	0.102869374	0.645307514
2	0.080217554	0.102910809	0.645340629
2	0.080220784	0.104566675	0.64536662
2	0.08022106	0.112106411	0.645368836
2	0.0802229	0.111166218	0.645383641
2	0.080231567	0.109217444	0.645453368
2	0.08024667	0.111819513	0.645574867
2	0.080257049	0.107563757	0.645658367
2	0.080278734	0.106690469	0.645832815
2	0.080290464	0.107415322	0.645927186
2	0.080321165	0.103578714	0.646174166
2	0.080334543	0.116895602	0.64628179
2	0.08033731	0.102198476	0.64630405
2	0.08034537	0.113853645	0.646368899
2	0.080346019	0.117017344	0.646374119
2	0.080354359	0.109053184	0.646441214
2	0.080354997	0.111056301	0.646446346
2	0.080374578	0.10912114	0.646603868
2	0.080378263	0.107819645	0.646633518
2	0.080379854	0.106473588	0.646646312
2	0.080381384	0.113472313	0.646658623
2	0.080382261	0.110939537	0.646665681
2	0.080383694	0.106568944	0.646677206
2	0.080385928	0.102923135	0.64669518
2	0.080389341	0.110763456	0.646722635
2	0.080397488	0.113555467	0.64678818
2	0.080399318	0.10120652	0.646802898
2	0.080413677	0.104634899	0.646918416
2	0.080419088	0.107171407	0.646961948
2	0.080420488	0.109782026	0.64697321
2	0.080441071	0.108289361	0.647138802
2	0.080449569	0.106594118	0.647207164
2	0.080461582	0.116576527	0.647303804
2	0.080466506	0.106301695	0.647343424
2	0.080479598	0.108791151	0.647448745
2	0.080482707	0.104969071	0.647473752
2	0.080488597	0.109602768	0.647521139
2	0.080489339	0.109158894	0.647527112
2	0.080490974	0.103538187	0.647540259
2	0.080501408	0.098888337	0.647624199
2	0.0805036	0.106167654	0.647641835
2	0.080518464	0.103442278	0.64776142
2	0.08051925	0.113097307	0.647767736
2	0.080519495	0.114745909	0.647769709
2	0.080521775	0.110637354	0.64778805
2	0.080525572	0.105312205	0.647818601
2	0.080537198	0.110519427	0.647912128
2	0.080538366	0.111946309	0.647921529
2	0.080549775	0.111850757	0.64801331
2	0.080558683	0.105636642	0.648084975
2	0.080562716	0.11225951	0.64811742
2	0.080564904	0.108781776	0.64813502
2	0.080566023	0.103295959	0.64814402
2	0.080570846	0.098875553	0.64818282
2	0.08057167	0.105032586	0.64818945
2	0.08057324	0.109654517	0.64820208
2	0.080578833	0.106737786	0.648247075
2	0.080582124	0.106569895	0.648273552
2	0.080588785	0.112441879	0.648327138
2	0.080590138	0.110946689	0.648338022
2	0.080594834	0.111534866	0.648375807
2	0.080601622	0.104674923	0.648430413
2	0.080603804	0.113558923	0.64844797
2	0.080618649	0.112553191	0.648567391
2	0.080629346	0.111426842	0.648653445
2	0.08063153	0.110860888	0.648671023
2	0.080651533	0.104005267	0.648831939
2	0.080664194	0.105521285	0.648933797
2	0.080673652	0.105748076	0.649009881
2	0.080681679	0.107057536	0.649074463
2	0.080692339	0.106076014	0.649160216
2	0.080709241	0.109235732	0.649296196
2	0.080715606	0.097990199	0.649347399
2	0.080715894	0.111321844	0.649349719
2	0.080724862	0.110523423	0.649421866
2	0.080729176	0.111417863	0.649456572
2	0.080742913	0.107688568	0.649567084
2	0.080752032	0.107418639	0.649640443
2	0.080764069	0.109962835	0.649737281
2	0.080775217	0.107195249	0.649826963
2	0.08077817	0.107508767	0.649850718
2	0.080783016	0.105107852	0.649889703
2	0.080785978	0.099217239	0.649913535
2	0.080789371	0.110803739	0.649940827
2	0.080789525	0.104404807	0.649942072
2	0.080804169	0.108203795	0.650059879
2	0.08080616	0.109837175	0.650075894
2	0.080807638	0.112153645	0.650087789
2	0.08082091	0.099760781	0.650194556
2	0.080828471	0.103948454	0.650255383
2	0.080843559	0.110395505	0.650376765
2	0.080846504	0.104784552	0.650400461
2	0.080857332	0.111414844	0.65048757
2	0.080872215	0.109513721	0.650607302
2	0.080873568	0.09845043	0.650618186
2	0.080884156	0.107786258	0.650703367
2	0.080887542	0.106667399	0.650730604
2	0.080887614	0.109972629	0.650731184
2	0.080899707	0.102311052	0.650828468
2	0.080900007	0.104799617	0.650830885
2	0.080907364	0.108454133	0.65089007
2	0.080907821	0.119354175	0.650893746
2	0.080908166	0.1064391	0.650896519
2	0.08092488	0.112872231	0.65103098
2	0.080927728	0.10545336	0.651053897
2	0.080928993	0.115860936	0.651064071
2	0.080931798	0.111249047	0.651086637
2	0.080932862	0.098671812	0.651095196
2	0.08093538	0.108516007	0.651115454
2	0.080938197	0.101390909	0.65113812
2	0.08094522	0.102626076	0.651194621
2	0.080949889	0.106117546	0.651232178
2	0.080950425	0.109212069	0.651236492
2	0.080952866	0.119132075	0.651256131
2	0.080953687	0.10336404	0.651262734
2	0.080963483	0.108323735	0.651341541
2	0.080966132	0.103348104	0.651362854
2	0.080971133	0.107519558	0.651403083
2	0.080972336	0.10836247	0.651412758
2	0.080972718	0.111464659	0.651415832
2	0.080977618	0.114562907	0.651455253
2	0.080981285	0.110593612	0.651484756
2	0.080995655	0.109270484	0.651600358
2	0.081007481	0.103475113	0.651695499
2	0.081007556	0.106150727	0.651696099
2	0.081008056	0.10516234	0.651700126
2	0.081009758	0.109280559	0.651713819
2	0.081013118	0.109265551	0.651740849
2	0.081018559	0.114048794	0.651784624
2	0.081023405	0.109274573	0.651823609
2	0.081039865	0.103942341	0.651956023
2	0.081040828	0.102824042	0.651963774
2	0.081041662	0.114783554	0.651970484
2	0.081061997	0.112297233	0.652134077
2	0.081071313	0.107467115	0.652209019
2	0.081071405	0.112379191	0.652209764
2	0.081106129	0.104524827	0.652489112
2	0.08110915	0.10819952	0.652513418
2	0.081113342	0.109102771	0.652547142
2	0.081116484	0.114643788	0.652572414
2	0.08111719	0.110768886	0.652578095
2	0.08112876	0.102839283	0.652671177
2	0.081130206	0.095192639	0.652682808
2	0.081137426	0.110360811	0.652740895
2	0.081145439	0.109162157	0.652805357
2	0.081155878	0.110751907	0.652889334
2	0.081157012	0.105079438	0.652898461
2	0.08116459	0.104325254	0.652959426
2	0.081173304	0.103041964	0.653029522
2	0.081175382	0.107598802	0.653046245
2	0.081177341	0.102542657	0.653062004
2	0.081179835	0.106957617	0.653082068
2	0.08118555	0.103401214	0.65312804
2	0.081188193	0.104710979	0.653149302
2	0.081191344	0.10998189	0.653174653
2	0.081203224	0.103288006	0.653270232
2	0.081205775	0.100714114	0.653290753
2	0.081206319	0.110403689	0.65329513
2	0.081207701	0.109599344	0.653306246
2	0.081214484	0.107590757	0.653360811
2	0.081221207	0.109208625	0.653414901
2	0.081235793	0.111621526	0.653532242
2	0.081236769	0.110070778	0.653540094
2	0.081245405	0.108889541	0.653609571
2	0.081253277	0.108086656	0.653672902
2	0.081262494	0.104420769	0.653747053
2	0.081276252	0.114000738	0.653857729
2	0.081280096	0.111528687	0.653888656
2	0.081281004	0.109128782	0.653895957
2	0.081285594	0.110419934	0.653932885
2	0.081286141	0.099784033	0.65393729
2	0.081286898	0.105276776	0.653943374
2	0.081287402	0.114223802	0.65394743
2	0.081287889	0.105310837	0.653951349
2	0.081289128	0.104810095	0.653961318
2	0.081289561	0.10826622	0.653964796
2	0.081290426	0.109213831	0.653971756
2	0.08129422	0.094037311	0.654002277
2	0.081295348	0.108009642	0.654011354
2	0.081296145	0.094368572	0.654017766
2	0.081300396	0.105045885	0.654051965
2	0.081303092	0.111461424	0.654073659
2	0.081304381	0.107991764	0.654084026
2	0.081316535	0.109158991	0.654181805
2	0.081319536	0.110527789	0.654205943
2	0.081324747	0.108846273	0.654247864
2	0.081329192	0.111622555	0.654283629
2	0.081330777	0.105999698	0.654296378
2	0.081331905	0.104502683	0.654305456
2	0.081332712	0.106012504	0.654311944
2	0.081333596	0.112671337	0.654319052
2	0.081337447	0.105911244	0.654350033
2	0.081338913	0.110866532	0.654361827
2	0.081342927	0.113995941	0.654394123
2	0.08134694	0.096093754	0.654426407
2	0.081352083	0.104236866	0.65446778
2	0.081353268	0.102383573	0.654477313
2	0.081360754	0.105932323	0.654537535
2	0.081366998	0.106944933	0.654587773
2	0.081371666	0.108277117	0.654625322
2	0.081373416	0.106045862	0.654639405
2	0.081374486	0.107988	0.654648008
2	0.08138021	0.107482443	0.65469406
2	0.081381254	0.109979441	0.654702456
2	0.081390501	0.111033443	0.654776853
2	0.081413758	0.109557343	0.65496395
2	0.081422151	0.108073359	0.655031468
2	0.081437102	0.113709904	0.655151746
2	0.081443875	0.106840219	0.655206239
2	0.081447217	0.107432686	0.655233121
2	0.081449432	0.107248849	0.655250946
2	0.081467661	0.105058395	0.655397592
2	0.081491687	0.108094474	0.655590876
2	0.081493377	0.110679013	0.655604471
2	0.081495591	0.112923892	0.655622288
2	0.081497563	0.106645295	0.655638148
2	0.081501694	0.109339297	0.655671385
2	0.081511315	0.099640159	0.655748783
2	0.081511635	0.102514868	0.655751355
2	0.081515373	0.114149882	0.655781429
2	0.081515772	0.111833961	0.655784639
2	0.081517748	0.110099667	0.65580054
2	0.081526351	0.115224677	0.655869745
2	0.081528715	0.10686304	0.655888768
2	0.081533197	0.11187974	0.655924822
2	0.081543815	0.1099339	0.656010241
2	0.081552032	0.108224881	0.656076344
2	0.081554828	0.109464109	0.656098838
2	0.081556367	0.110362675	0.656111219
2	0.081557874	0.111024002	0.656123348
2	0.081561598	0.107836144	0.656153308
2	0.081563329	0.104323644	0.656167227
2	0.081568051	0.107033873	0.656205215
2	0.081568983	0.108470125	0.656212714
2	0.081575756	0.105916008	0.656267204
2	0.081578184	0.11240957	0.65628674
2	0.081590941	0.112459162	0.656389366
2	0.081603971	0.107263507	0.656494193
2	0.081617993	0.115573719	0.656606994
2	0.081618268	0.106387092	0.65660921
2	0.08163096	0.108146683	0.656711315
2	0.081639017	0.108662014	0.656776128
2	0.081646466	0.108900059	0.65683606
2	0.081650408	0.102962403	0.656867767
2	0.081667159	0.105124851	0.657002533
2	0.081668999	0.107411051	0.657017331
2	0.081672389	0.112111921	0.657044606
2	0.081674352	0.109317241	0.657060397
2	0.081679536	0.11070335	0.6571021
2	0.081683312	0.105272665	0.657132481
2	0.081685017	0.108387444	0.657146195
2	0.081686443	0.110487923	0.657157665
2	0.081688852	0.110275605	0.65717705
2	0.081689433	0.109268965	0.657181725
2	0.08170581	0.104553182	0.657313471
2	0.081707309	0.113986601	0.657325531
2	0.081735358	0.103159978	0.657551182
2	0.081740874	0.113482804	0.657595558
2	0.081749165	0.104983271	0.657662259
2	0.081760561	0.107715787	0.657753939
2	0.081765213	0.113243779	0.657791363
2	0.081783243	0.098451958	0.657936408
2	0.08178362	0.108465891	0.657939448
2	0.081785533	0.11080465	0.657954838
2	0.08178704	0.108359457	0.657966959
2	0.081794924	0.112402224	0.658030382
2	0.081813075	0.103554688	0.658176409
2	0.081826627	0.114144975	0.658285429
2	0.081828762	0.1083954	0.658302611
2	0.081843972	0.109898953	0.658424971
2	0.081844827	0.111940993	0.65843185
2	0.081849368	0.104345957	0.658468383
2	0.081849948	0.101750019	0.658473044
2	0.081857009	0.109180099	0.658529852
2	0.081864427	0.100502414	0.658589531
2	0.081865383	0.101829046	0.658597218
2	0.08186916	0.109014934	0.658627603
2	0.0818738	0.112095974	0.658664929
2	0.081878778	0.111500373	0.658704977
2	0.081882898	0.102131654	0.658738128
2	0.081896119	0.103788966	0.658844485
2	0.081897457	0.101865144	0.658855254
2	0.081903401	0.110811977	0.658903072
2	0.081905316	0.111672062	0.658918476
2	0.081916901	0.107053893	0.659011677
2	0.08191814	0.106420086	0.659021643
2	0.081933878	0.111794442	0.659148254
2	0.08193566	0.1036316	0.659162585
2	0.081937342	0.109634261	0.659176121
2	0.081940215	0.112308448	0.659199233
2	0.081948549	0.109689726	0.659266279
2	0.081957302	0.107701946	0.659336699
2	0.081967675	0.109936552	0.659420142
2	0.081967869	0.108393259	0.65942171
2	0.081972033	0.108278921	0.659455206
2	0.081973588	0.104755763	0.659467714
2	0.081976784	0.110437934	0.659493424
2	0.081979234	0.110971339	0.659513135
2	0.081982418	0.105955065	0.659538748
2	0.081982634	0.112265754	0.659540488
2	0.081988216	0.108998877	0.659585392
2	0.08200285	0.111870096	0.659703125
2	0.082003935	0.106391377	0.659711856
2	0.08200507	0.104692018	0.659720986
2	0.082009044	0.100016882	0.659752952
2	0.082012015	0.103357401	0.659776853
2	0.082012946	0.114731344	0.659784348
2	0.082017985	0.110735334	0.659824885
2	0.082037369	0.11000841	0.659980829
2	0.082043691	0.112019254	0.660031681
2	0.082047544	0.108709268	0.66006268
2	0.08205379	0.10919991	0.660112928
2	0.082062273	0.111854532	0.660181172
2	0.082066705	0.110019139	0.660216834
2	0.082066869	0.110859408	0.660218147
2	0.082083569	0.098178768	0.660352497
2	0.082088933	0.099159446	0.660395652
2	0.082091328	0.112518883	0.660414919
2	0.0821047	0.109924846	0.660522495
2	0.082111342	0.105585715	0.660575933
2	0.082112722	0.110868845	0.66058703
2	0.082115606	0.108570325	0.660610232
2	0.082126998	0.110684896	0.660701882
2	0.082128491	0.111813116	0.660713893
2	0.082129187	0.108849448	0.66071949
2	0.08213803	0.110222988	0.660790634
2	0.082141132	0.109514827	0.660815589
2	0.082155371	0.101764094	0.660930137
2	0.082163543	0.106844071	0.660995878
2	0.082165665	0.109109406	0.661012949
2	0.082166803	0.104891147	0.661022108
2	0.082168791	0.104308906	0.6610381
2	0.082170234	0.108687919	0.661049712
2	0.082173076	0.107645114	0.661072575
2	0.082182019	0.107302156	0.661144518
2	0.082207945	0.106978918	0.661353089
2	0.082228906	0.111770784	0.661521718
2	0.082239096	0.11315364	0.661603698
2	0.082240083	0.106596406	0.661611633
2	0.082241061	0.106645047	0.661619499
2	0.082242685	0.106854875	0.661632565
2	0.082248664	0.113802599	0.66168067
2	0.08226254	0.107863849	0.661792299
2	0.082262971	0.109360533	0.66179577
2	0.082264035	0.107651317	0.66180433
2	0.082271538	0.10765088	0.66186469
2	0.082275542	0.104012244	0.6618969
2	0.082283141	0.101923619	0.661958028
2	0.082291239	0.106997766	0.662023182
2	0.082298012	0.109572393	0.662077667
2	0.082302085	0.102379545	0.662110432
2	0.082307492	0.111450716	0.662153935
2	0.082310276	0.109321594	0.662176329
2	0.082327783	0.09798542	0.662317173
2	0.082331323	0.110983388	0.662345648
2	0.08234022	0.106381711	0.662417226
2	0.082346867	0.102462833	0.6624707
2	0.082358104	0.107686921	0.6625611
2	0.082383861	0.109780682	0.662768315
2	0.082384785	0.104228926	0.662775744
2	0.082387403	0.110284959	0.662796808
2	0.082393765	0.112316072	0.662847986
2	0.082411727	0.110589807	0.662992491
2	0.082413498	0.107548049	0.66300674
2	0.082427985	0.107951952	0.663123288
2	0.082432669	0.114573541	0.663160966
2	0.082437624	0.10965813	0.663200825
2	0.082438433	0.102182336	0.663207335
2	0.082442256	0.110000049	0.663238091
2	0.08244538	0.112344819	0.663263222
2	0.082445957	0.113319823	0.663267867
2	0.082446261	0.111528674	0.663270312
2	0.082451095	0.108652012	0.663309205
2	0.08246579	0.112240218	0.663427421
2	0.082470394	0.111011149	0.663464461
2	0.082475404	0.111427819	0.663504762
2	0.082495258	0.113631289	0.663664485
2	0.08249837	0.107862675	0.663689521
2	0.082527109	0.108240152	0.663920727
2	0.082527474	0.111032797	0.663923662
2	0.082538392	0.110641453	0.664011493
2	0.082561074	0.110244808	0.664193968
2	0.082562377	0.111905613	0.664204449
2	0.082566339	0.109028979	0.664236322
2	0.082581444	0.109137517	0.664357847
2	0.082610237	0.107179691	0.664589481
2	0.082612955	0.108771789	0.664611345
2	0.082613107	0.111968234	0.664612565
2	0.082614577	0.110235731	0.664624397
2	0.082620037	0.114522765	0.664668319
2	0.082623477	0.112606922	0.664695992
2	0.082628788	0.108255283	0.664738717
2	0.082633218	0.111453273	0.664774357
2	0.082633583	0.106170592	0.664777298
2	0.08264084	0.105011243	0.664835676
2	0.082647263	0.107813899	0.664887347
2	0.082647317	0.106672832	0.664887787
2	0.082653405	0.112684365	0.664936761
2	0.082654769	0.11124067	0.664947734
2	0.082664651	0.111980662	0.665027231
2	0.082680874	0.104459386	0.665157748
2	0.082693233	0.11162773	0.66525717
2	0.082693735	0.109218723	0.66526121
2	0.082704874	0.105782352	0.66535082
2	0.082708051	0.110095443	0.665376383
2	0.082720066	0.105090558	0.665473038
2	0.08274969	0.10754643	0.665711363
2	0.082757701	0.107050712	0.665775814
2	0.082770745	0.109936933	0.665880746
2	0.082771654	0.109744685	0.665888062
2	0.082791781	0.110009236	0.666049978
2	0.082810681	0.108112511	0.666202029
2	0.082815557	0.113917561	0.666241255
2	0.082823685	0.106767351	0.66630664
2	0.082825479	0.105395316	0.66632108
2	0.082829039	0.108670045	0.666349717
2	0.082836469	0.106168863	0.666409486
2	0.082836556	0.102613936	0.666410187
2	0.082847556	0.108283109	0.666498684
2	0.082850376	0.109115746	0.666521368
2	0.082859079	0.107817949	0.666591381
2	0.082872873	0.113412108	0.666702354
2	0.082895905	0.109677225	0.666887644
2	0.082901907	0.111818124	0.666935929
2	0.082910529	0.108756511	0.667005295
2	0.082914067	0.108502808	0.667033754
2	0.082914351	0.103475516	0.667036044
2	0.082916099	0.112247201	0.667050101
2	0.08292143	0.113275051	0.667092993
2	0.082929224	0.112321254	0.667155692
2	0.082931537	0.106296741	0.667174298
2	0.082936744	0.108511364	0.66721619
2	0.082942413	0.111766636	0.667261792
2	0.082945355	0.105394921	0.667285462
2	0.082947012	0.115162692	0.667298794
2	0.082969549	0.109028015	0.667480103
2	0.082971116	0.107215884	0.667492708
2	0.082985123	0.110430532	0.667605389
2	0.082987949	0.105920472	0.667628127
2	0.082992421	0.106593308	0.667664108
2	0.083014432	0.112154941	0.667841178
2	0.083018257	0.107211958	0.667871951
2	0.083035118	0.11225868	0.668007599
2	0.0830383	0.11182581	0.668033196
2	0.083042258	0.105679699	0.668065038
2	0.083045551	0.111558788	0.668091528
2	0.083051155	0.110899255	0.668136612
2	0.083052744	0.11069642	0.668149392
2	0.083054561	0.103710884	0.668164014
2	0.083056875	0.105886702	0.668182631
2	0.083066752	0.109934086	0.668262092
2	0.083072537	0.10239463	0.668308625
2	0.083087541	0.113847747	0.668429336
2	0.083093583	0.110320281	0.668477939
2	0.083094794	0.10924063	0.66848768
2	0.08309996	0.106620903	0.668529245
2	0.083104878	0.106821416	0.668568805
2	0.083106008	0.103137889	0.668577896
2	0.083117088	0.111835103	0.668667034
2	0.083128884	0.111873144	0.66876193
2	0.083136358	0.11065134	0.668822061
2	0.083147657	0.104947427	0.668912963
2	0.083151173	0.112175464	0.668941247
2	0.083160218	0.112164359	0.669014009
2	0.083161096	0.111561359	0.669021071
2	0.083168883	0.101305447	0.669083719
2	0.083174084	0.111502418	0.669125563
2	0.083177623	0.111616575	0.669154034
2	0.083189676	0.10678838	0.669250998
2	0.083194346	0.111881607	0.669288566
2	0.083195227	0.111519522	0.669295656
2	0.08320003	0.109685984	0.669334297
2	0.083231648	0.109879467	0.669588657
2	0.083243953	0.114706951	0.669687646
2	0.083246669	0.107720327	0.669709502
2	0.083253939	0.111056383	0.669767983
2	0.083261375	0.104176646	0.669827808
2	0.083268783	0.107575045	0.6698874
2	0.083273928	0.110159981	0.669928795
2	0.083281175	0.11212493	0.669987095
2	0.08328354	0.109610521	0.670006122
2	0.083299144	0.110400693	0.670131652
2	0.083331418	0.113555176	0.670391297
2	0.083367241	0.112616707	0.670679487
2	0.083378395	0.105387501	0.670769215
2	0.083384521	0.108187254	0.670818501
2	0.083387379	0.11226757	0.670841494
2	0.083398959	0.106118278	0.670934658
2	0.083405469	0.110339404	0.670987026
2	0.083411616	0.111250006	0.671036478
2	0.083418325	0.110590556	0.671090449
2	0.08342047	0.107726168	0.671107711
2	0.083451048	0.10595073	0.671353703
2	0.083451439	0.11256455	0.671356852
2	0.083525655	0.111848434	0.671953908
2	0.083531592	0.111863881	0.672001667
2	0.083534239	0.106464204	0.672022963
2	0.083557743	0.110044054	0.672212054
2	0.083560595	0.111823235	0.672234998
2	0.083567193	0.114060256	0.67228808
2	0.083579836	0.112754224	0.672389789
2	0.083580404	0.107954193	0.67239436
2	0.083600665	0.113148	0.672557352
2	0.083600732	0.110993662	0.672557892
2	0.083602336	0.110033885	0.672570797
2	0.083619736	0.104257463	0.672710777
2	0.083623566	0.112546281	0.672741589
2	0.083670657	0.111485388	0.673120432
2	0.083691185	0.104805125	0.673285573
2	0.083694429	0.112927089	0.673311673
2	0.083711462	0.107207654	0.673448702
2	0.083716025	0.108644467	0.67348541
2	0.083746885	0.111256895	0.67373368
2	0.083747128	0.102415348	0.673735634
2	0.083756732	0.109820971	0.673812894
2	0.083759215	0.110698001	0.67383287
2	0.083764543	0.109036784	0.673875737
2	0.083767003	0.106862494	0.673895526
2	0.083810296	0.109496141	0.674243812
2	0.083836052	0.10296223	0.674451016
2	0.083866912	0.107953756	0.674699277
2	0.083898675	0.101670527	0.674954811
2	0.083913766	0.107757267	0.675076213
2	0.0839177	0.109533064	0.675107861
2	0.083924367	0.110189808	0.675161496
2	0.083929736	0.103878718	0.675204691
2	0.083945878	0.110294327	0.675334556
2	0.083954402	0.108304998	0.675403128
2	0.083977699	0.113268071	0.675590545
2	0.083989348	0.106106895	0.675684265
2	0.084041589	0.107599573	0.67610454
2	0.084057253	0.106819397	0.676230554
2	0.084065568	0.105664555	0.676297446
2	0.08406916	0.107898638	0.676326342
2	0.08407707	0.10360669	0.67638998
2	0.0841083	0.108175809	0.676641218
2	0.084128292	0.106798678	0.676802051
2	0.084132361	0.11042766	0.676834787
2	0.084160669	0.108333699	0.677062518
2	0.084170989	0.108434653	0.677145544
2	0.08421039	0.110782595	0.677462522
2	0.084252031	0.111971311	0.677797516
2	0.084273774	0.111475776	0.67797244
2	0.084281686	0.113201399	0.678036087
2	0.084281951	0.108115453	0.678038218
2	0.084285609	0.111119682	0.678067649
2	0.084348613	0.110556924	0.678574509
2	0.084369796	0.108361245	0.678744919
2	0.084413651	0.112568888	0.679097733
2	0.084418206	0.11205564	0.679134377
2	0.084544197	0.111030188	0.680147953
2	0.084569783	0.107553655	0.680353794
2	0.084576046	0.094409348	0.680404178
2	0.084591801	0.112379022	0.680530926
2	0.084618866	0.112528196	0.680748661
2	0.084770642	0.100558142	0.681969683
2	0.084777985	0.11002046	0.682028755
2	0.084877918	0.108376871	0.682832701
2	0.084895348	0.100241253	0.682972924
2	0.08492143	0.109577727	0.683182754
2	0.084928481	0.107397785	0.683239478
2	0.084952557	0.1071938	0.683433165
2	0.084968148	0.100967385	0.683558592
2	0.084999955	0.109183575	0.683814473
2	0.085087846	0.107114304	0.68452155
2	0.085119846	0.112810028	0.684778982
2	0.085137427	0.11409127	0.684920425
2	0.085150037	0.113196557	0.68502187
2	0.085170922	0.106738878	0.685189887
2	0.08526708	0.110780673	0.685963465
2	0.085969582	0.103818382	0.691615007
2	0.085987481	0.103023129	0.691759006
2	0.086147382	0.098607463	0.693045391
2	0.086290404	0.107606793	0.694195986
2	0.08638284	0.105511035	0.694939619
2	0.088338895	0.116077186	0.710675845
2	0.091296152	0.110293338	0.734466625
