# Supplementary material for: Quantitative mapping of protein-peptide affinity landscapes using spectrally encoded beads
Source: eLife journal article supplement (doi:10.7554/elife.40499), 2019-07-08
Supplement: supp [file elife-40499-supp-v1.zip › elife_poa_e40499_Figure_1_source_data_2.csv]

code	rat_dy_icp	rat_sm_icp	rat_tm_icp
1	-0.002091657	0.657994695	0.081976237
1	-0.001868837	0.718479282	0.090726384
1	-0.001721836	0.693060094	0.086906331
1	-0.001715215	0.705396951	0.0887141
1	-0.001482027	0.692160313	0.086631965
1	-0.001456494	0.687793717	0.085975577
1	-0.001405634	0.692589592	0.086649698
1	-0.001380025	0.687898707	0.085945641
1	-0.001308378	0.698844566	0.087510572
1	-0.001304053	0.703253659	0.088155492
1	-0.001264577	0.688207534	0.085922521
1	-0.001259404	0.667040713	0.082811057
1	-0.001227681	0.68342649	0.085198531
1	-0.001213442	0.676791373	0.084215704
1	-0.001207632	0.686391132	0.085622004
1	-0.001206199	0.663948857	0.082325455
1	-0.001199384	0.6910559	0.086302144
1	-0.001144832	0.685484491	0.085451615
1	-0.001132228	0.656626963	0.081206345
1	-0.001118426	0.691395543	0.086304006
1	-0.001096497	0.689020911	0.085942279
1	-0.001092915	0.664428422	0.082328692
1	-0.001085919	0.681798301	0.084875349
1	-0.001081078	0.707187387	0.088600923
1	-0.001064284	0.690854047	0.086192374
1	-0.001063068	0.675315845	0.083909832
1	-0.001029951	0.673536792	0.083628933
1	-0.001009653	0.695769055	0.086881752
1	-0.000992302	0.691580401	0.086256348
1	-0.000988754	0.671493053	0.083304371
1	-0.000980148	0.67857816	0.084339731
1	-0.000976694	0.660430322	0.081672631
1	-0.000974507	0.676367242	0.084011706
1	-0.000964249	0.678822533	0.084366188
1	-0.000960822	0.685722362	0.085377411
1	-0.000939619	0.704984054	0.088193459
1	-0.000939236	0.692644147	0.086381089
1	-0.000931949	0.708641709	0.088726045
1	-0.000924546	0.680083317	0.084527789
1	-0.000904022	0.69795667	0.087140359
1	-0.000870777	0.687691407	0.085613164
1	-0.000862738	0.670934066	0.083147542
1	-0.000857076	0.686842499	0.085480374
1	-0.000856161	0.69101698	0.086092864
1	-0.000827862	0.682449841	0.084817975
1	-0.000825047	0.692706057	0.086322455
1	-0.000820104	0.68283489	0.08486992
1	-0.00081437	0.70263194	0.087773761
1	-0.000810623	0.682109906	0.08475783
1	-0.000788776	0.690533711	0.085981928
1	-0.000788454	0.693710235	0.086448217
1	-0.000787552	0.713463653	0.089348517
1	-0.000781777	0.686437598	0.085376253
0	-0.000779152	0.109826197	0.000697988
1	-0.000774395	0.691758216	0.08615322
1	-0.000760812	0.682734284	0.084819979
1	-0.000735849	0.718813843	0.09010354
1	-0.000724651	0.689696313	0.085820922
1	-0.000723077	0.692321795	0.086205546
1	-0.000711243	0.686129802	0.085289219
1	-0.000708743	0.685360931	0.085174826
1	-0.000707223	0.654012416	0.080570323
1	-0.000702101	0.668486621	0.082692855
1	-0.000701747	0.693301737	0.086336802
1	-0.000700496	0.708864085	0.088621427
1	-0.000697701	0.675033873	0.083651725
1	-0.000694974	0.673134314	0.083371153
1	-0.000681377	0.675115166	0.083653981
1	-0.000680253	0.68006282	0.084379889
0	-0.000677988	0.112552007	0.00103828
1	-0.000675323	0.689991554	0.085835022
1	-0.000666539	0.669250626	0.08278396
1	-0.000662095	0.660236284	0.081457547
0	-0.00066189	0.110163045	0.000677907
1	-0.000648774	0.686060545	0.085241998
1	-0.000647632	0.676019803	0.083766815
1	-0.000646523	0.686235221	0.085266315
1	-0.000643507	0.679949761	0.084341492
1	-0.000641077	0.684915286	0.085069249
1	-0.000627317	0.671440548	0.083082292
1	-0.000619157	0.69140543	0.086009341
0	-0.000615165	0.110988197	0.00077137
1	-0.000612853	0.700977384	0.087411266
1	-0.00060723	0.669991997	0.082857656
1	-0.000597077	0.693210947	0.08626139
1	-0.000596197	0.677923429	0.084015861
1	-0.000592806	0.674451867	0.083504043
1	-0.000586659	0.70173403	0.087506845
1	-0.000582312	0.686728237	0.085300632
1	-0.000581805	0.698777752	0.08706983
1	-0.000579474	0.685391835	0.085102695
1	-0.0005794	0.656333135	0.080835315
1	-0.000577244	0.664825035	0.082081091
1	-0.000570588	0.689497699	0.08570038
1	-0.000556799	0.68937471	0.085674141
1	-0.000547095	0.692862857	0.086180628
1	-0.00053661	0.689112722	0.085623693
1	-0.000533991	0.674999377	0.083549563
1	-0.000532703	0.671526746	0.083038835
1	-0.000532578	0.667942259	0.082512371
1	-0.000529112	0.681387937	0.084484844
1	-0.000525724	0.682957095	0.084713269
1	-0.000524339	0.680587084	0.084364406
1	-0.000520053	0.694409745	0.086391753
0	-0.000510902	0.119126309	0.001904632
0	-0.000498333	0.125863045	0.002886483
1	-0.000492974	0.692547814	0.086102264
0	-0.000491747	0.114219638	0.001172715
1	-0.0004897	0.694581952	0.08639904
0	-0.00048394	0.105091027	-0.000172472
1	-0.00047535	0.654186252	0.080458327
0	-0.000474048	0.101112856	-0.000762543
1	-0.000464405	0.657299605	0.080909039
1	-0.000461358	0.682069672	0.084544773
1	-0.000453036	0.704556786	0.087842122
1	-0.000452677	0.685035325	0.084975137
1	-0.000450508	0.688021595	0.085412391
0	-0.000449654	0.126107082	0.002893448
1	-0.000449036	0.69715252	0.086752416
1	-0.000443573	0.689170266	0.085576964
0	-0.000439999	0.123988069	0.002576541
1	-0.000438533	0.695541933	0.086509668
1	-0.000435273	0.70202256	0.087459429
1	-0.00043059	0.687291307	0.085293333
0	-0.000429422	0.109320487	0.000416299
1	-0.000426325	0.679194379	0.084101752
1	-0.00042053	0.695160158	0.086442926
1	-0.000419869	0.697160906	0.086736349
1	-0.000406973	0.68325028	0.084685892
1	-0.000395125	0.682405805	0.084554853
0	-0.000390933	0.108585639	0.000285557
1	-0.000389826	0.690177313	0.085692973
1	-0.000387225	0.694367141	0.086306717
1	-0.00038642	0.691951061	0.085951432
1	-0.000385842	0.687870612	0.085351866
1	-0.000353605	0.677409162	0.083796458
1	-0.000352128	0.696306932	0.086570763
1	-0.000343391	0.662475723	0.081597391
1	-0.000343229	0.676653257	0.083679298
0	-0.000342704	0.126308303	0.002859566
1	-0.000341438	0.682957951	0.084604095
1	-0.000331368	0.698171668	0.086832291
1	-0.000331252	0.637668505	0.077947194
0	-0.000324868	0.114899717	0.001173611
1	-0.000322122	0.696237579	0.086542782
0	-0.000321343	0.104172411	-0.000403809
1	-0.000313162	0.683350927	0.084645033
1	-0.000312246	0.676545552	0.083645105
1	-0.000310997	0.693248211	0.086097188
1	-0.000308515	0.666270211	0.082133935
1	-0.000308436	0.681283625	0.084338642
0	-0.00030487	0.111913521	0.00072322
0	-0.0003034	0.116087719	0.001335339
1	-0.000292841	0.699425001	0.086993496
0	-0.000291597	0.114311283	0.001067465
0	-0.000289679	0.113873899	0.001002096
1	-0.00028905	0.690855985	0.085732867
1	-0.000286201	0.672243683	0.082997919
1	-0.000286108	0.668066875	0.082384489
1	-0.00027865	0.684242664	0.084755518
0	-0.000273057	0.110425978	0.000485903
1	-0.000270116	0.701509353	0.087286109
1	-0.000264719	0.687826427	0.085273539
1	-0.000264666	0.699069946	0.086924645
1	-0.000262187	0.689029711	0.085448743
1	-0.000256445	0.669149627	0.082525901
0	-0.000254325	0.109172905	0.000290776
1	-0.000251462	0.694560927	0.086254653
1	-0.000250223	0.682135196	0.084429171
1	-0.000248996	0.685297756	0.084892873
1	-0.000247043	0.69809721	0.086771344
1	-0.000242652	0.690750754	0.085689896
1	-0.000239996	0.709701094	0.088471221
1	-0.000239117	0.683059648	0.084558343
1	-0.000237236	0.693284976	0.086058839
1	-0.000237055	0.670763838	0.082751452
1	-0.000235214	0.687832074	0.085256869
1	-0.000233128	0.685047658	0.084846734
1	-0.000231766	0.681945233	0.084390328
1	-0.000231132	0.697787087	0.086716365
1	-0.000230657	0.700007054	0.08704209
0	-0.000218113	0.105199957	-0.000314137
1	-0.000213001	0.688825811	0.085389627
0	-0.000204288	0.108390911	0.000146262
1	-0.000201195	0.697126072	0.086601538
1	-0.000197165	0.697651444	0.086676299
1	-0.000195055	0.671047293	0.082768167
1	-0.000194809	0.68942845	0.085467337
1	-0.000193996	0.699884169	0.0870023
1	-0.00019173	0.688256226	0.085293366
1	-0.000191656	0.672322498	0.082953418
1	-0.000185678	0.691394545	0.085750646
1	-0.000183706	0.677136079	0.083655588
0	-0.000182436	0.104103983	-0.000496244
1	-0.000182097	0.700448334	0.087078092
1	-0.000178314	0.692344047	0.085885715
0	-0.000173522	0.103039087	-0.000657913
1	-0.000167737	0.686777687	0.08506201
1	-0.000161844	0.684816664	0.084770534
0	-0.000161243	0.111547331	0.000584259
1	-0.000156474	0.675474932	0.083395494
1	-0.000151627	0.663975162	0.081703851
1	-0.000142373	0.688442501	0.085291448
1	-0.000136982	0.686748476	0.085039479
0	-0.000136882	0.111398193	0.000547909
0	-0.000121156	0.12361533	0.002332697
1	-0.000121069	0.680280215	0.084080162
0	-0.000113559	0.122421917	0.002152936
0	-0.000112023	0.110891117	0.0004587
0	-0.000106298	0.106840189	-0.000139583
1	-9.58E-05	0.690362538	0.08554576
1	-9.41E-05	0.664923993	0.081809057
1	-9.11E-05	0.704103257	0.087560878
1	-8.68E-05	0.687102279	0.085061692
1	-8.54E-05	0.643144291	0.0786055
0	-7.76E-05	0.103807849	-0.000601937
1	-6.99E-05	0.68743962	0.085101197
1	-5.40E-05	0.679396175	0.083910555
1	-5.33E-05	0.643120358	0.078582965
1	-5.23E-05	0.654962587	0.080321399
1	-4.84E-05	0.688038836	0.085176436
0	-4.58E-05	0.110507754	0.00036312
0	-4.20E-05	0.123783556	0.002310448
1	-4.05E-05	0.664941849	0.081779876
1	-3.98E-05	0.680858969	0.084116929
1	-3.83E-05	0.706556891	0.087889838
1	-3.82E-05	0.674586542	0.083194904
1	-3.68E-05	0.671957044	0.082807908
1	-3.37E-05	0.68164955	0.084229411
1	-3.30E-05	0.697380625	0.086539169
1	-3.09E-05	0.67702456	0.083548582
1	-2.97E-05	0.680241648	0.084020283
1	-1.73E-05	0.678388162	0.083740791
1	-1.73E-05	0.691544857	0.085672834
0	-1.49E-05	0.11288437	0.000693811
0	-8.65E-06	0.107182152	-0.000147278
1	-4.44E-06	0.669623757	0.082446067
1	-5.24E-07	0.703676614	0.087444482
0	0	0.102079494	-0.000901747
0	0	0.111024218	0.000411806
0	0	0.113428464	0.000764875
0	0	0.115032587	0.001000444
0	0	0.117452614	0.001355831
0	0	0.121929085	0.002013211
0	0	0.123110752	0.002186741
0	0	0.115337425	0.00104521
0	0	0.108544887	4.77E-05
0	0	0.111747156	0.000517971
0	0	0.103386789	-0.000709768
0	0	0.112574691	0.000639496
1	0	0.681499185	0.084187365
1	0	0.67172053	0.082751347
1	0	0.672022549	0.082795699
1	0	0.658227568	0.080769874
1	0	0.674550109	0.083166877
1	0	0.698459567	0.086678036
1	0	0.692245429	0.085765475
1	0	0.6966539	0.086412869
1	0	0.683608426	0.084497111
1	0	0.694687959	0.086124166
1	0	0.678708713	0.083777577
1	0	0.645759679	0.078938936
1	0	0.657849097	0.080714295
1	0	0.676391458	0.083437283
1	0	0.66832005	0.082251978
1	0	0.673326672	0.082987212
1	0	0.677628546	0.083618952
1	0	0.68966838	0.08538703
1	0	0.688113017	0.085158621
1	0	0.681275676	0.084154542
1	0	0.681548408	0.084194593
1	0	0.681968832	0.084256333
1	0	0.706028273	0.087789518
1	0	0.69524972	0.086206662
1	0	0.686146338	0.08486981
1	0	0.667612855	0.082148125
1	0	0.678867488	0.083800894
1	0	0.685586017	0.084787525
1	0	0.684809539	0.084673498
1	0	0.683617471	0.08449844
1	0	0.667055705	0.082066306
1	0	0.639704257	0.078049683
1	0	0.644910825	0.07881428
1	0	0.667106843	0.082073816
1	0	0.676462381	0.083447698
1	0	0.698400086	0.086669301
1	0	0.672529649	0.082870168
1	0	0.662294917	0.081367174
1	0	0.675686877	0.083333814
1	0	0.689934362	0.08542609
1	0	0.679989079	0.083965602
1	0	0.690404931	0.085495194
1	0	0.687355872	0.085047433
1	0	0.704667605	0.0875897
1	0	0.700393535	0.086962043
1	0	0.693306924	0.085921358
1	0	0.692600402	0.085817604
1	0	0.702268549	0.087237393
1	0	0.704255625	0.0875292
1	0	0.682057315	0.084269327
1	0	0.692875242	0.085857965
1	0	0.676374902	0.083434852
1	0	0.668724129	0.082311318
1	0	0.658578853	0.080821461
1	0	0.657874287	0.080717994
1	0	0.661092093	0.081190536
1	0	0.680862773	0.084093906
1	0	0.675909578	0.083366518
1	0	0.673087579	0.082952101
1	0	0.69729153	0.086506507
1	0	0.675391127	0.083290382
1	0	0.668791959	0.082321279
1	0	0.692441657	0.085794292
1	0	0.664950993	0.081757225
1	0	0.655784363	0.080411084
1	0	0.689525448	0.08536604
1	0	0.694868714	0.086150711
1	0	0.681988014	0.08425915
1	0	0.676203282	0.083409649
1	0	0.686557559	0.084930198
1	0	0.691279135	0.085623573
1	0	0.689913354	0.085423005
1	0	0.7029279	0.087334221
1	0	0.691037937	0.085588152
1	0	0.683626096	0.084499706
1	0	0.691545661	0.085662713
1	0	0.68618982	0.084876195
1	0	0.696509063	0.0863916
1	0	0.686651275	0.084943961
1	0	0.696226736	0.086350139
1	0	0.69475543	0.086134075
1	0	0.6972216	0.086496237
1	0	0.723046788	0.090288726
1	0	0.696551361	0.086397811
1	0	0.702400358	0.08725675
1	0	0.686413845	0.084909094
1	0	0.687572888	0.085079302
1	0	0.690403286	0.085494952
1	0	0.685923248	0.084837048
1	0	0.673207861	0.082969765
1	0	0.684034576	0.084559693
1	0	0.692809492	0.085848309
1	0	0.697485353	0.08653497
1	0	0.689709537	0.085393074
1	0	0.688246696	0.085178252
1	0	0.69093837	0.085573531
1	0	0.70020225	0.086933953
1	0	0.660674673	0.081129237
1	0	0.659957401	0.081023904
1	0	0.679100361	0.083835092
1	0	0.688806713	0.085260492
1	0	0.67894013	0.083811562
1	0	0.689948317	0.085428139
1	0	0.681333651	0.084163055
1	0	0.691113866	0.085599303
1	0	0.69315642	0.085899256
1	0	0.680067785	0.08397716
1	0	0.687677382	0.085094647
1	0	0.69728703	0.086505846
1	0	0.680035799	0.083972463
1	0	0.698489443	0.086682423
1	0	0.698084032	0.086622887
1	0	0.658893107	0.08086761
1	0	0.678642362	0.083767834
1	0	0.678259335	0.083711585
1	0	0.696705968	0.086420516
1	0	0.6837309	0.084515097
1	0	0.680796937	0.084084238
1	0	0.680596454	0.084054796
1	0	0.66519763	0.081793444
1	0	0.698539335	0.08668975
1	0	0.715287562	0.089149265
1	0	0.683933471	0.084544845
1	0	0.683359226	0.084460516
1	0	0.660493089	0.081102571
1	0	0.675749856	0.083343062
1	0	0.666198066	0.08194036
1	0	0.684456435	0.084621643
1	0	0.683108174	0.084423648
1	0	0.697904164	0.086596473
1	0	0.678114416	0.083690303
1	0	0.684104724	0.084569994
1	0	0.695219785	0.086202266
1	0	0.694821354	0.086143756
1	0	0.678572193	0.083757529
1	0	0.701957351	0.087191693
1	0	0.693973821	0.086019293
1	0	0.684706689	0.084658394
1	0	0.682606673	0.084350002
1	0	0.699574996	0.086841839
1	0	0.683187865	0.084435351
1	0	0.686813582	0.084967796
1	0	0.677063761	0.083536012
1	0	0.662990706	0.081469352
1	0	0.689677815	0.085388415
1	0	0.698365656	0.086664245
1	0	0.680490902	0.084039296
1	0	0.688884141	0.085271862
1	0	0.680048885	0.083974385
1	0	0.645732681	0.078934971
1	0	0.685263755	0.0847402
1	0	0.669110469	0.082368053
1	0	0.686150559	0.08487043
1	0	0.686693774	0.084950202
1	0	0.67697381	0.083522803
1	0	0.694128098	0.08604195
1	0	0.676072433	0.083390434
1	0	0.661274735	0.081217358
1	0	0.693844274	0.086000269
1	0	0.684476713	0.084624621
1	0	0.681042432	0.084120289
1	0	0.690790775	0.085551856
1	0	0.687490404	0.085067189
1	0	0.689905902	0.08542191
1	0	0.665489264	0.081836271
1	0	0.689168977	0.085313691
1	0	0.687625528	0.085087032
1	0	0.662930194	0.081460466
1	0	0.674238242	0.083121078
1	0	0.671886941	0.082775784
1	0	0.692033801	0.085734397
1	0	0.686354104	0.084900321
1	0	0.693006899	0.085877299
1	0	0.691987341	0.085727574
1	0	0.681523733	0.084190969
1	0	0.687101	0.085010004
1	0	0.682272155	0.084300877
1	0	0.669768418	0.082464674
1	0	0.683704562	0.084511229
1	0	0.690183766	0.085462715
1	0	0.697735214	0.086571663
1	0	0.70096068	0.08704533
1	0	0.673022024	0.082942474
1	0	0.678413891	0.083734282
1	0	0.64213697	0.078406933
1	2.72E-07	0.696093714	0.086330443
1	2.79E-06	0.691617855	0.085671659
1	2.86E-06	0.69619473	0.086343745
0	4.17E-06	0.109013994	0.000114129
0	5.03E-06	0.105181185	-0.000449242
1	1.16E-05	0.698188027	0.086631256
1	1.31E-05	0.665602177	0.081845082
1	1.64E-05	0.697289497	0.086496466
1	1.85E-05	0.694732781	0.086119749
1	2.15E-05	0.69116686	0.085594337
1	2.17E-05	0.683210054	0.084425748
0	2.29E-05	0.114017186	0.000837724
1	2.49E-05	0.684724818	0.08464628
0	3.18E-05	0.107228824	-0.000164391
1	3.71E-05	0.668209153	0.08221366
0	4.97E-05	0.110183796	0.000258935
0	5.03E-05	0.116415627	0.001173737
0	5.14E-05	0.106708763	-0.00025239
0	5.37E-05	0.113068663	0.000680174
0	5.46E-05	0.111955587	0.000516208
0	6.10E-05	0.106147118	-0.000340598
1	6.24E-05	0.685488086	0.084736154
1	6.39E-05	0.674266894	0.083087384
1	7.14E-05	0.698724979	0.086674664
1	7.24E-05	0.69934282	0.086764805
0	7.64E-05	0.11771913	0.00134963
1	7.74E-05	0.691572422	0.085620722
1	8.10E-05	0.680068577	0.083929214
1	8.29E-05	0.692238082	0.085715209
0	8.71E-05	0.114594302	0.000884406
1	9.14E-05	0.686817455	0.084914163
1	9.44E-05	0.682375435	0.084260053
1	9.52E-05	0.693119434	0.085837373
1	9.96E-05	0.682382354	0.084257964
1	0.000101139	0.711311808	0.088505431
1	0.000102421	0.685780994	0.084755412
0	0.00010396	0.107401286	-0.000181889
1	0.000108038	0.691683653	0.0856189
1	0.00010869	0.666285503	0.081888736
0	0.000119948	0.110350356	0.000241706
0	0.000120299	0.110187938	0.000217647
0	0.00012319	0.116015763	0.001071762
1	0.00012641	0.686784372	0.084888533
1	0.000130924	0.68297292	0.084326135
0	0.000130934	0.111962133	0.000471884
1	0.000131139	0.683167165	0.084354533
1	0.000131554	0.688349294	0.085115294
1	0.000131606	0.677619734	0.083539603
1	0.000132736	0.681473456	0.084104861
0	0.000135148	0.115330995	0.00096411
1	0.000137542	0.669371008	0.082324738
1	0.000137727	0.695748512	0.086198225
1	0.000140801	0.688058409	0.085067093
1	0.000148244	0.696986625	0.086373807
1	0.000148502	0.654005471	0.080061773
0	0.000149639	0.113881939	0.000742718
0	0.000152049	0.110214995	0.000202789
1	0.000152917	0.681907112	0.084156575
1	0.000154903	0.688634727	0.085143362
0	0.00015607	0.104677607	-0.000612773
0	0.000158956	0.119683981	0.001589235
1	0.00016909	0.684651042	0.084549935
1	0.000169576	0.697737408	0.08647141
0	0.000175166	0.101006745	-0.001163174
0	0.000183797	0.104797715	-0.00061158
0	0.000188183	0.108705255	-4.04E-05
0	0.000188261	0.106046844	-0.00043079
0	0.000189602	0.122793644	0.00202772
1	0.000192459	0.668651314	0.082186478
0	0.000202772	0.098757925	-0.001509791
1	0.000202997	0.699013419	0.086638973
1	0.000206234	0.643331835	0.078460084
1	0.000217007	0.686587554	0.084805896
1	0.000217635	0.690691022	0.085408128
1	0.000219698	0.685109039	0.084587177
0	0.000222452	0.098566763	-0.001549536
1	0.000222714	0.717845364	0.089392793
1	0.000223504	0.702681511	0.087165478
0	0.000223573	0.109739673	9.06E-05
1	0.000225274	0.679128878	0.08370567
1	0.000235782	0.671764623	0.08261798
0	0.000236409	0.116998713	0.00114896
0	0.000237489	0.115891088	0.000985662
1	0.000242294	0.695610618	0.086115957
1	0.000242595	0.665255363	0.081658039
1	0.000245766	0.688117863	0.085013569
1	0.000246734	0.710814955	0.088346115
0	0.000248065	0.104245085	-0.000730853
1	0.000248313	0.673231055	0.082825896
0	0.000248621	0.104585656	-0.000681168
0	0.000249992	0.110408706	0.000173146
1	0.000252805	0.671386209	0.082552313
1	0.000253542	0.683291113	0.084300138
1	0.000254212	0.663403251	0.081379162
1	0.000257282	0.694907514	0.086003815
1	0.000258608	0.689001672	0.085135742
0	0.000266921	0.12042341	0.001633788
1	0.000270099	0.643586872	0.078459659
1	0.000271297	0.679209489	0.083690211
0	0.000273546	0.114094773	0.000700484
1	0.000285707	0.691198263	0.085442244
1	0.00029053	0.632921195	0.076881262
0	0.000297778	0.112584591	0.000464338
1	0.000303647	0.675406051	0.083112481
0	0.000304339	0.108090323	-0.000199547
1	0.000305958	0.689352225	0.085159138
0	0.000306342	0.114617652	0.000757819
0	0.000309805	0.113601102	0.000606482
1	0.000315192	0.662106455	0.081152557
1	0.000315816	0.686288437	0.084703367
1	0.000317148	0.66360807	0.081371913
1	0.00032236	0.678073857	0.083493155
1	0.000324157	0.688661637	0.08504693
0	0.000326704	0.108596873	-0.000138423
1	0.000333296	0.67669264	0.083283834
1	0.000333374	0.697914824	0.086400315
0	0.000334237	0.104388171	-0.000760949
0	0.000345226	0.110615913	0.000147092
0	0.000353137	0.104430225	-0.000765983
0	0.000358907	0.109979518	4.55E-05
1	0.000369749	0.69957784	0.086622958
1	0.000371766	0.673857265	0.082844637
1	0.000372666	0.691578974	0.085446577
0	0.000374409	0.118028759	0.001218377
1	0.000377835	0.646020873	0.078753199
0	0.000381754	0.118943905	0.001348412
1	0.000386734	0.688892214	0.085043676
1	0.000387511	0.681278751	0.083925161
0	0.000389647	0.115702063	0.000867659
1	0.000395916	0.688418707	0.084968695
0	0.000403019	0.115266906	0.000795824
1	0.000403125	0.684962149	0.084456815
1	0.000412889	0.661411212	0.080992515
0	0.000413701	0.102499466	-0.00108544
0	0.00041434	0.095647909	-0.002091985
1	0.000415241	0.688293121	0.08493879
1	0.000415644	0.679854519	0.083699323
1	0.000423717	0.67745921	0.083342778
1	0.000424399	0.684376296	0.084358164
0	0.000425102	0.100267461	-0.001419977
1	0.000425223	0.679090115	0.083581387
1	0.000433131	0.696557626	0.086141841
1	0.000440533	0.657876882	0.080457095
1	0.000444849	0.688202207	0.084907879
1	0.000448675	0.700079553	0.086649825
1	0.00045125	0.65242599	0.079650263
1	0.000453283	0.688251911	0.084910176
0	0.000455401	0.107217601	-0.000417303
0	0.000456263	0.094282066	-0.002317427
1	0.000460482	0.675424694	0.0830222
0	0.000461883	0.105781983	-0.000631971
1	0.000462388	0.690294784	0.085204776
1	0.000463951	0.686251145	0.084610032
1	0.000466921	0.69088023	0.085288062
1	0.000476484	0.678543298	0.083470683
0	0.00047671	0.104726955	-0.000795698
0	0.00049148	0.117594715	0.001085202
1	0.000493206	0.676737539	0.083195585
1	0.000494092	0.687360628	0.084755085
1	0.000500648	0.71359718	0.088604094
0	0.000508704	0.101833785	-0.001239543
1	0.000515929	0.697895329	0.086289179
1	0.000516802	0.690148198	0.085150977
1	0.000527737	0.694944221	0.085848798
0	0.000541342	0.108692079	-0.000251744
1	0.000543541	0.69222134	0.085439564
0	0.00056247	0.113067118	0.00037821
0	0.000565551	0.099722561	-0.001583297
1	0.000566898	0.681386185	0.083834544
1	0.000570165	0.667237882	0.081754895
0	0.000572056	0.095183238	-0.002253764
1	0.000575798	0.664855757	0.081401733
0	0.00058005	0.101803932	-0.001286241
1	0.000586241	0.706288251	0.087479997
1	0.000590525	0.680232148	0.083651057
1	0.000592208	0.699836873	0.086529058
0	0.000610063	0.105694505	-0.000732703
1	0.000618038	0.690573801	0.085153435
1	0.000623805	0.69526732	0.085839268
1	0.000625216	0.676028107	0.083013109
1	0.000629674	0.678570197	0.083383777
1	0.000630955	0.701227756	0.086710331
1	0.000631203	0.68679888	0.084591271
0	0.000632327	0.105310904	-0.00080224
1	0.000632358	0.698048199	0.086242574
1	0.000664461	0.686168091	0.084478912
1	0.000669431	0.689183056	0.084918719
1	0.000677133	0.662466829	0.080990812
1	0.000679246	0.682991257	0.084003618
1	0.000688149	0.664573175	0.0812936
1	0.000690046	0.676117581	0.082987798
1	0.000696458	0.670408159	0.082145553
1	0.000705294	0.676300749	0.083005653
0	0.000705352	0.096183253	-0.002185968
1	0.000705383	0.664786132	0.081314652
1	0.000709565	0.679441368	0.083464327
1	0.000711982	0.671092026	0.082236773
0	0.000718118	0.097016801	-0.002071131
1	0.000718518	0.680308961	0.083586425
1	0.000723263	0.676213835	0.082982232
0	0.000724689	0.109410126	-0.00025504
1	0.000740604	0.655547652	0.079937071
1	0.000747265	0.702705085	0.086858297
1	0.000748324	0.678702386	0.083332817
1	0.000751481	0.651894597	0.07939416
1	0.000755692	0.690394972	0.085045531
1	0.000755966	0.661188213	0.080756288
1	0.000759827	0.669306742	0.081946223
1	0.000793919	0.666337048	0.081489897
1	0.000807173	0.689321917	0.084857417
1	0.000819007	0.668713501	0.081824005
1	0.000847274	0.676337789	0.082926884
1	0.000847692	0.676176263	0.082902916
1	0.000859342	0.68077302	0.08357105
1	0.000859955	0.70443507	0.087045513
1	0.000862529	0.683928424	0.084032538
1	0.000889645	0.6618104	0.080768373
1	0.000893796	0.67333005	0.082457598
1	0.000896504	0.678921057	0.083277044
1	0.000896722	0.672991055	0.08240608
1	0.000918871	0.668797935	0.081777175
1	0.000937578	0.660164356	0.080498219
1	0.000952215	0.669744419	0.081896392
1	0.000958717	0.664473855	0.081118541
1	0.000960147	0.681012102	0.083546372
1	0.000966808	0.696499752	0.085816819
1	0.000969585	0.678989204	0.083243708
1	0.000973472	0.671329998	0.08211663
1	0.000978251	0.686113441	0.084284778
1	0.001031105	0.657507464	0.080052577
1	0.001060028	0.671257729	0.082054681
1	0.001066396	0.685550285	0.084149799
1	0.001079511	0.691202183	0.084972015
1	0.001099015	0.679451593	0.083234846
1	0.001105661	0.677851678	0.082995953
1	0.001156117	0.668959221	0.081660149
1	0.001156283	0.681353337	0.083480156
1	0.001167449	0.671708907	0.082057226
1	0.001218782	0.672211136	0.082100534
1	0.001266334	0.677324694	0.082823269
1	0.001286379	0.69280646	0.085084913
1	0.001321854	0.671499133	0.081934843
1	0.001323493	0.669499469	0.081640215
1	0.00133033	0.665562105	0.081057949
1	0.001387441	0.665613075	0.081031562
1	0.001427295	0.675748028	0.082496266
1	0.001431545	0.656435839	0.079657706
1	0.001451055	0.647938526	0.078398285
1	0.001456982	0.673486805	0.082146593
1	0.001527822	0.681994208	0.083353909
1	0.001558357	0.671229053	0.081754911
1	0.001572319	0.653206632	0.079099996
1	0.001660916	0.687947863	0.084149279
1	0.001910224	0.685460992	0.083636212
1	0.001944642	0.668968684	0.081193865
1	0.001957777	0.669604652	0.081279469
1	0.002064868	0.671821851	0.081541553
1	0.002191917	0.688663994	0.083939508
1	0.00221155	0.670060564	0.081195907
1	0.002217018	0.678915847	0.082493083
1	0.002219887	0.671595047	0.081416305
1	0.002284029	0.698152396	0.08527827
1	0.00233831	0.666583887	0.080610168
1	0.002624384	0.693791173	0.08443595
2	0.07378735	0.445534194	0.005772117
2	0.07406039	0.468471721	0.008978605
2	0.074681299	0.453763138	0.006450355
2	0.074996978	0.446309347	0.005168519
2	0.075201048	0.46124924	0.007241443
2	0.07620366	0.46808725	0.007650972
2	0.076299505	0.435609883	0.00282475
2	0.076483544	0.443232204	0.003834952
2	0.076932118	0.428719159	0.001437629
2	0.076950195	0.449036515	0.004410558
2	0.077196483	0.457658497	0.005530642
2	0.077303695	0.430726643	0.001512051
2	0.077535233	0.458302348	0.005424281
2	0.077538917	0.447928793	0.003898716
2	0.077565721	0.455561004	0.005003626
2	0.07771777	0.430665409	0.00125747
2	0.077905404	0.451087644	0.004145237
2	0.077916673	0.45078548	0.00409418
2	0.077959148	0.430991246	0.001162159
2	0.077960921	0.422595513	-7.18E-05
2	0.078034106	0.44505084	0.003182386
2	0.078149334	0.453504231	0.004355444
2	0.078285914	0.446375974	0.003227637
2	0.078297074	0.422632835	-0.000265716
2	0.078363315	0.429357919	0.00068259
2	0.078421166	0.429516485	0.000671564
2	0.078435613	0.422814426	-0.000321217
2	0.07855064	0.40660978	-0.002769128
2	0.078560236	0.447535631	0.003235235
2	0.078572413	0.420313381	-0.000769637
2	0.078592066	0.429554807	0.000575832
2	0.078627505	0.430176468	0.000646105
2	0.078791215	0.414387021	-0.001769708
2	0.07880282	0.43219917	0.000839164
2	0.078808654	0.453542632	0.00397004
2	0.078811423	0.457894505	0.00460748
2	0.078836307	0.431529344	0.000720937
2	0.078846272	0.412310576	-0.002107293
2	0.078856537	0.440396509	0.002011103
2	0.078937607	0.426281977	-0.000109732
2	0.07895014	0.417794639	-0.00136355
2	0.078995325	0.443522104	0.002387789
2	0.079002111	0.436811079	0.001398234
2	0.079035923	0.433401612	0.000877492
2	0.079042226	0.447604745	0.002959516
2	0.079082945	0.423234456	-0.000643467
2	0.079088114	0.428687811	0.000154305
2	0.079094144	0.401393385	-0.00385752
2	0.079106869	0.409499048	-0.002674732
2	0.079114118	0.435534599	0.001144349
2	0.079178538	0.419804377	-0.001203878
2	0.079210512	0.434354641	0.000913898
2	0.079255288	0.453510578	0.003700435
2	0.079264389	0.428011987	-4.95E-05
2	0.079320163	0.458369565	0.004375511
2	0.079388285	0.425454833	-0.000498496
2	0.079444009	0.435958064	0.001010877
2	0.079457245	0.451880249	0.003341236
2	0.079459942	0.447071368	0.002633442
2	0.079468147	0.438153094	0.001318906
2	0.079478924	0.441017419	0.001733147
2	0.079498465	0.429920247	9.19E-05
2	0.079556979	0.440195889	0.00156621
2	0.079577475	0.414624772	-0.002201124
2	0.079632157	0.430720594	0.000130152
2	0.079639537	0.441875765	0.001763938
2	0.079665214	0.436323797	0.00093339
2	0.079669824	0.436715344	0.000988155
2	0.079692702	0.450762078	0.003037381
2	0.079696302	0.432766893	0.000392612
2	0.079697405	0.444570157	0.002125294
2	0.079719876	0.403537859	-0.003913721
2	0.079762843	0.433649177	0.000482712
2	0.079768728	0.429699128	-0.000100852
2	0.079769727	0.432699503	0.000339167
2	0.079780574	0.424104743	-0.000929427
2	0.079801361	0.42541613	-0.000749175
2	0.079811057	0.437700247	0.001049025
2	0.079813382	0.4571625	0.003905723
2	0.079840068	0.401876397	-0.004228996
2	0.079848403	0.424790216	-0.000868993
2	0.079911572	0.424428766	-0.000959538
2	0.079918308	0.447610284	0.002440726
2	0.07997397	0.437785679	0.000964947
2	0.079989628	0.443389435	0.001778585
2	0.080032568	0.435700933	0.000624043
2	0.080043676	0.410152461	-0.003134397
2	0.080046857	0.449238623	0.002603609
2	0.08008597	0.427718945	-0.000579803
2	0.080099924	0.436424028	0.000690282
2	0.080135258	0.445340685	0.001978757
2	0.080165082	0.426814852	-0.000759492
2	0.080165279	0.435127375	0.000461104
2	0.080166074	0.441798971	0.001440371
2	0.080202154	0.44273946	0.001557085
2	0.080203555	0.424575299	-0.001111194
2	0.0802703	0.444305785	0.001746687
2	0.080278477	0.438329888	0.000864263
2	0.080279605	0.432593538	2.12E-05
2	0.080292562	0.436896379	0.000645394
2	0.080366668	0.4260119	-0.000996968
2	0.080368783	0.431873843	-0.000137383
2	0.080369122	0.430919522	-0.000277728
2	0.080426115	0.436398024	0.000493
2	0.080467768	0.44586217	0.001858127
2	0.080512283	0.42320566	-0.001495436
2	0.080524926	0.430551022	-0.00042425
2	0.080525642	0.426745733	-0.000983491
2	0.08054023	0.445853167	0.001813828
2	0.080543818	0.441536894	0.001177845
2	0.080559542	0.447134785	0.001990582
2	0.080604946	0.444682725	0.001603562
2	0.080610967	0.438557591	0.000700502
2	0.080616963	0.432439648	-0.000201488
2	0.080645201	0.448532637	0.002145056
2	0.080660181	0.438733238	0.000697107
2	0.08067134	0.430224665	-0.000559015
2	0.080671376	0.454910417	0.003066123
2	0.08070305	0.415622541	-0.002722178
2	0.080709943	0.423848847	-0.001518214
2	0.080797095	0.42483727	-0.001424752
2	0.080800795	0.440940988	0.000937922
2	0.080805083	0.417987181	-0.002435441
2	0.080819136	0.44325748	0.001267226
2	0.080850086	0.427052027	-0.001130938
2	0.08087319	0.433901987	-0.000138709
2	0.080875695	0.43629296	0.000210925
2	0.08088248	0.424997104	-0.001451921
2	0.080895177	0.426710847	-0.001207785
2	0.080905033	0.42534709	-0.001413901
2	0.080930815	0.446290202	0.001646352
2	0.081013528	0.449733893	0.002103008
2	0.081014571	0.439557269	0.00060793
2	0.081014766	0.430258082	-0.000757794
2	0.08104433	0.428765513	-0.000994515
2	0.08108218	0.430980417	-0.0006917
2	0.081093891	0.456388087	0.003032529
2	0.081106237	0.435746797	-6.01E-06
2	0.081118656	0.436391626	8.13E-05
2	0.081153821	0.438514901	0.000372266
2	0.081177359	0.435612729	-6.79E-05
2	0.081187836	0.440804205	0.000688281
2	0.081192101	0.437973849	0.000270107
2	0.081195263	0.444719905	0.001258906
2	0.081262748	0.449260843	0.001885728
2	0.081271615	0.451198807	0.002165063
2	0.081287193	0.446026467	0.001396254
2	0.081290814	0.439415638	0.000423291
2	0.081342362	0.454094113	0.002548285
2	0.081354671	0.410356262	-0.003882019
2	0.081367993	0.437307952	6.80E-05
2	0.081420708	0.433646596	-0.000500946
2	0.081424909	0.431000255	-0.000892059
2	0.081445209	0.447045907	0.001452242
2	0.081475356	0.437277245	-1.89E-07
2	0.081476568	0.415389826	-0.003215125
2	0.081479596	0.438810689	0.000222486
2	0.081506722	0.443953043	0.000961564
2	0.081507551	0.431249249	-0.000904509
2	0.081510448	0.428433903	-0.001319667
2	0.081551813	0.433292426	-0.000630716
2	0.081559431	0.457674122	0.002945274
2	0.081576321	0.44356468	0.000863253
2	0.081578261	0.418787159	-0.002776534
2	0.081584398	0.445412122	0.001129764
2	0.08160186	0.426666414	-0.001633443
2	0.081602324	0.45359793	0.002321237
2	0.081604045	0.448373082	0.001552935
2	0.081611002	0.430822147	-0.001028586
2	0.081614847	0.409715524	-0.004130423
2	0.081616828	0.44505704	0.001058385
2	0.081620281	0.438639176	0.000113858
2	0.081686968	0.452126075	0.002054889
2	0.081698887	0.419917738	-0.002682049
2	0.081701823	0.436495089	-0.000249368
2	0.081705296	0.426082877	-0.001780485
2	0.081835876	0.435475453	-0.000478611
2	0.081840176	0.444199021	0.000799915
2	0.081845577	0.439577179	0.000117983
2	0.081848977	0.44635632	0.0011115
2	0.081864873	0.434121169	-0.000694688
2	0.081874835	0.425748796	-0.001930099
2	0.081878397	0.431449751	-0.001095013
2	0.08192251	0.445653699	0.000964706
2	0.081955539	0.439529671	4.58E-05
2	0.081968149	0.44075115	0.000217687
2	0.081981527	0.438106278	-0.000178653
2	0.082071132	0.43877351	-0.000133813
2	0.08209036	0.450920719	0.001638628
2	0.082098451	0.438981738	-0.000119437
2	0.082137845	0.444264682	0.00063301
2	0.082144791	0.451313479	0.001664023
2	0.082198741	0.436566202	-0.000533647
2	0.082208255	0.432298803	-0.001165967
2	0.082209917	0.430333694	-0.001455533
2	0.082236583	0.422042202	-0.002688974
2	0.082246593	0.451018941	0.00156039
2	0.082274953	0.450817539	0.001513993
2	0.082296044	0.419373663	-0.003116121
2	0.082297625	0.445734853	0.000754143
2	0.082300628	0.437548307	-0.000449851
2	0.082321258	0.439342066	-0.000198669
2	0.082347751	0.424737935	-0.002359032
2	0.0823725	0.429746286	-0.001638223
2	0.082383279	0.434802513	-0.000902098
2	0.082403781	0.439821783	-0.000177166
2	0.082412224	0.432532668	-0.001252597
2	0.08241484	0.435215108	-0.000860226
2	0.082482364	0.435698182	-0.000829334
2	0.082485542	0.446868217	0.000809127
2	0.08248701	0.443204906	0.00027029
2	0.082492872	0.444009294	0.00038494
2	0.082497951	0.444912014	0.000514494
2	0.082518406	0.429948812	-0.001695018
2	0.082533539	0.442162334	8.96E-05
2	0.082556519	0.440492941	-0.000169194
2	0.082599799	0.426549454	-0.002242497
2	0.082608662	0.435609195	-0.000917309
2	0.08261925	0.435141717	-0.000992239
2	0.082637656	0.43856141	-0.000500966
2	0.082639002	0.426214982	-0.002314866
2	0.082683332	0.438944157	-0.000471849
2	0.082685884	0.431537412	-0.00156106
2	0.082697822	0.451225034	0.001323032
2	0.08272506	0.435645032	-0.000981082
2	0.082731949	0.426336374	-0.002352166
2	0.082749107	0.449330102	0.00101434
2	0.082771782	0.438262216	-0.000624454
2	0.082781064	0.434803856	-0.001137827
2	0.082822691	0.44370068	0.000144003
2	0.082822705	0.446806826	0.00060014
2	0.082854641	0.437134548	-0.000839198
2	0.082857634	0.440780429	-0.000305567
2	0.082859927	0.436791666	-0.000892686
2	0.082870893	0.412553126	-0.004458675
2	0.082872484	0.443582962	9.72E-05
2	0.082880525	0.440303381	-0.000389199
2	0.082913097	0.442541505	-7.98E-05
2	0.082924332	0.439107663	-0.000590775
2	0.082926407	0.441901275	-0.000181757
2	0.082947807	0.450213795	0.001026263
2	0.08295517	0.440705002	-0.000374492
2	0.082968043	0.446972154	0.000538219
2	0.082969304	0.440153009	-0.000463936
2	0.083001955	0.432715007	-0.001575589
2	0.083005559	0.446889813	0.000503876
2	0.083042372	0.438543491	-0.000743634
2	0.083050328	0.439401902	-0.000622293
2	0.083051843	0.44041617	-0.000474244
2	0.083069091	0.442040261	-0.000245972
2	0.083096432	0.441081145	-0.000403037
2	0.083107617	0.446958283	0.000453401
2	0.083110588	0.433671134	-0.00149961
2	0.083112168	0.429648352	-0.002091302
2	0.08312774	0.446902262	0.000433239
2	0.083214609	0.433528965	-0.001582183
2	0.083221709	0.445375079	0.000153236
2	0.083250768	0.444669932	3.24E-05
2	0.083251409	0.426146738	-0.002688106
2	0.083257271	0.43857794	-0.000866032
2	0.08328039	0.428417491	-0.002371829
2	0.083336315	0.430335188	-0.00212338
2	0.08334941	0.450736282	0.000864801
2	0.083352765	0.436166589	-0.001276782
2	0.083365225	0.429711954	-0.00223205
2	0.083366956	0.435893973	-0.001325232
2	0.083372544	0.4423358	-0.00038255
2	0.083404246	0.434552312	-0.001544376
2	0.083444663	0.443110373	-0.000311576
2	0.083462994	0.450749216	0.000799334
2	0.083465674	0.449561616	0.000623342
2	0.083469888	0.450376704	0.000740541
2	0.083482578	0.447487843	0.000308778
2	0.083486113	0.430673645	-0.002162522
2	0.083507888	0.433329037	-0.001785487
2	0.083564259	0.430772581	-0.002194342
2	0.08357359	0.441477086	-0.000627894
2	0.083582804	0.431840523	-0.002048511
2	0.083605406	0.445172465	-0.00010409
2	0.08366896	0.447534776	0.000205128
2	0.083677987	0.431366535	-0.00217457
2	0.083681925	0.455869095	0.001421352
2	0.083703861	0.436397245	-0.001451144
2	0.083723546	0.432206733	-0.002078206
2	0.083764427	0.437475436	-0.001328731
2	0.083774542	0.434377836	-0.00178962
2	0.083812211	0.431890591	-0.002177219
2	0.083818201	0.434957844	-0.001730339
2	0.083878769	0.439816766	-0.001052718
2	0.083926196	0.436584307	-0.00155554
2	0.083927986	0.448698082	0.000222333
2	0.083931434	0.442949858	-0.000623852
2	0.083932232	0.454595311	0.001085837
2	0.083963322	0.447481804	2.28E-05
2	0.08399662	0.432519479	-0.002194239
2	0.084058343	0.450309782	0.000381701
2	0.08406768	0.43192918	-0.002323071
2	0.084075067	0.436642644	-0.001635269
2	0.084232957	0.44586888	-0.00037402
2	0.084304366	0.44030308	-0.001233723
2	0.084334425	0.440438869	-0.00123161
2	0.084404769	0.443556225	-0.00081554
2	0.084407944	0.451064923	0.000285246
2	0.084415534	0.428402588	-0.003047271
2	0.084429187	0.435398796	-0.00202796
2	0.084451958	0.44011812	-0.001348421
2	0.084529613	0.444770266	-0.0007113
2	0.08455621	0.445190792	-0.000665319
2	0.08463344	0.454437002	0.000646703
2	0.084680713	0.444446066	-0.000848527
2	0.084696295	0.433217909	-0.00250665
2	0.084706928	0.437803593	-0.001839537
2	0.084746042	0.449253371	-0.00018131
2	0.08476922	0.442702671	-0.001157042
2	0.084850482	0.44928793	-0.000238178
2	0.084860163	0.433534444	-0.002557355
2	0.084869733	0.423249328	-0.004073425
2	0.084881137	0.450759671	-4.02E-05
2	0.08497766	0.437826077	-0.001996807
2	0.085033062	0.442632767	-0.001323793
2	0.085080708	0.443743154	-0.001188988
2	0.085132745	0.435695742	-0.002401632
2	0.085275258	0.442317769	-0.001513697
2	0.085302561	0.436996474	-0.002311334
2	0.085384536	0.412662825	-0.005933406
2	0.085609467	0.433337492	-0.00303069
2	0.085621626	0.448654828	-0.000788516
2	0.085648262	0.4529561	-0.000172662
2	0.08569668	0.439260563	-0.0022126
2	0.08592201	0.436998273	-0.002678465
2	0.086085038	0.446566198	-0.001370086
2	0.086293532	0.446228621	-0.001543317
