# Supplementary material for: Quantitative mapping of protein-peptide affinity landscapes using spectrally encoded beads
Source: eLife journal article supplement (doi:10.7554/elife.40499), 2019-07-08
Supplement: supp [file elife-40499-supp-v1.zip › elife_poa_e40499_Figure_2_source_data_1.csv]

	conc	code	AVG	SD	N	CV	SEM	RSEM	MED	AVG_NORM	SD_NORM	N_NORM	CV_NORM	SEM_NORM	RSEM_NORM	MED_NORM	sequence
1	1000	1	3856.316894	1282.51397	112	0.332574839	121.1861792	0.031425368	3579.55369	6017.618348	2306.84861	112	0.383349105	217.9767048	0.036223086	5585.741149	AGPHPVIVITGPHEE
2	1000	2	-37.97591405	30.94662976	59	-0.814901511	4.028908027	-0.10609114	-36.88688008	-55.16996351	46.77511893	59	-0.847836684	6.089601795	-0.110378935	-53.58785637	AGIVPIHVTHAPGEE
4	1000	4	126.4413293	81.19673854	28	0.642169289	15.34474125	0.121358588	116.6738153	198.0636758	133.3734494	28	0.673386722	25.20521275	0.127258129	182.76338	AGPHPVIVINGPHEE
5	1000	5	8.704188874	65.42344477	36	7.516317226	10.90390746	1.252719538	-13.85854814	11.36308119	85.43068194	36	7.518267318	14.23844699	1.253044553	-18.09195664	AGPHPVIAVTGPHEE
6	1000	6	2933.421895	1631.939278	209	0.556326139	112.8836003	0.038481884	2535.522209	3790.438948	2191.603505	209	0.578192535	151.5963844	0.039994414	3276.290447	AGPHPAIVITGPHEE
7	1000	7	4688.910885	4736.296003	182	1.010105784	351.0776176	0.074874022	3624.370228	6604.112309	6762.093708	182	1.023921671	501.239734	0.075898124	5104.75644	AGPHPAIVITGPHEE
8	1000	10	49.82620053	110.8633922	77	2.225001927	12.63405608	0.253562502	23.62312078	74.96421627	167.5761968	77	2.235415843	19.09707998	0.254749278	35.54131595	AGPHPVIAVTGPSEE
9	1000	12	2583.125588	1051.683559	93	0.407136054	109.0545048	0.042218042	2364.538394	5248.454776	2653.148795	93	0.505510461	275.1187139	0.052418993	4804.32422	AGPHPVIVITGPHEE
10	1000	13	-47.92791526	237.5833865	140	-4.957098284	20.079461	-0.418951271	-27.03724685	-66.67278839	330.6992807	140	-4.960033752	27.94919041	-0.419199363	-37.61166384	AGIVPIHVTHAPGEE
11	1000	14	4088.513456	2560.581451	138	0.626286663	217.9711682	0.053313061	3462.396689	6169.768115	3987.710896	138	0.646330757	339.4564943	0.055019328	5224.927085	AGPHPVIVVTGPHEE
12	1000	15	127.9796959	111.2272352	115	0.869100637	10.37199317	0.081044052	94.10221625	171.3889528	151.8221169	115	0.885833739	14.1574854	0.082604422	126.0206175	AGPHPVIVINGPHEE
13	1000	16	-29.26435729	27.96203707	118	-0.955498075	2.574114159	-0.087960728	-27.08042152	-43.93247585	42.89636149	118	-0.976415753	3.948930158	-0.089886356	-40.65389007	AGPHPVIAVTGPHEE
14	1000	17	3191.092719	2348.794481	85	0.736047081	254.762531	0.079835515	2694.854382	4749.967489	3603.262142	85	0.758586696	390.8286531	0.08228028	4011.312685	AGPHPAIVITGPHEE
15	1000	18	3294.203354	1432.659183	249	0.43490308	90.79108673	0.027560863	2963.763772	4536.346204	2100.687202	249	0.463079119	133.1256423	0.029346447	4081.30801	AGPHPAIVITGPHEE
16	1000	21	-18.13975604	30.27766953	168	-1.669133227	2.335972919	-0.128776424	-18.11136984	-24.80231677	41.50135791	168	-1.673285536	3.201899277	-0.129096782	-24.76350458	AGPHPVIAVTGPSEE
17	1000	23	2769.459035	1004.155604	128	0.362581859	88.75565464	0.032048011	2587.846399	3575.386662	1424.67122	128	0.398466335	125.9243351	0.035219781	3340.923762	AGPHPVIVITGPHEE
18	1000	24	-0.554520532	285.9557052	94	-515.6810053	29.49407898	-53.18843452	-27.7369209	-0.949493959	489.6360487	94	-515.6810571	50.50210235	-53.18843986	-47.49335208	AGIVPIHVTHAPGEE
19	1000	25	3203.598745	1356.248103	170	0.423351428	104.0194812	0.032469572	2876.873024	4379.128533	2009.49991	170	0.458881235	154.1216076	0.035194584	3932.513947	AGPHPVIVVTGPHEE
20	1000	26	196.3579102	171.7296542	149	0.874574668	14.06864144	0.071647949	147.3439001	264.6684857	237.0807402	149	0.895764902	19.42241101	0.07338392	198.603086	AGPHPVIVINGPHEE
21	1000	27	-16.59946336	72.17037289	93	-4.347753377	7.483719048	-0.450841023	-22.86056846	-25.49119244	110.9224745	93	-4.351403912	11.50212479	-0.451219566	-35.10614392	AGPHPVIAVTGPHEE
22	1000	28	2938.812149	1653.059852	159	0.56249252	131.0961737	0.044608559	2681.182917	4144.994851	2449.675863	159	0.590996117	194.2719328	0.046869041	3781.626325	AGPHPAIVITGPHEE
23	1000	32	28.5357605	90.63067305	120	3.176038468	8.273410672	0.289931319	4.617177574	39.58664672	125.8597486	120	3.17934857	11.48937057	0.290233488	6.405246411	AGPHPVIAVTGPSEE
24	1000	33	4750.853396	3626.368441	178	0.76330885	271.8078063	0.057212417	3886.813449	6466.719976	5037.986061	178	0.779063587	377.6130202	0.058393285	5290.614566	AGPHPAIVITGPHEE
25	1000	34	53.2494763	102.0781382	114	1.916979194	9.560493589	0.179541551	40.09896357	66.44776193	127.8875897	114	1.924633517	11.9777702	0.180258444	50.03779512	PALESPRIEITSCLGL
26	1000	35	2982.870885	3055.535741	130	1.024360711	267.9882125	0.089842378	1780.235288	4259.270908	4442.58055	130	1.043037798	389.6400897	0.091480467	2542.015617	ASGLSPRIEITPSHEL
27	1000	36	347.7939123	303.0466774	124	0.871339798	27.21439501	0.078248624	273.4304427	749.035426	693.1051511	124	0.925330267	62.24268	0.083097111	588.8806012	ASGLSPRIEITGSHEL
28	1000	37	-19.85019873	31.35781727	186	-1.57972309	2.299266718	-0.115830917	-19.95857402	-24.49793786	38.85489433	186	-1.586047551	2.848979079	-0.116294649	-24.63168821	ATDTTPSVVVHVCESD
29	1000	38	423.0719499	195.9365444	112	0.463128185	18.51426318	0.0437615	401.9569544	724.9471162	367.6067186	112	0.507080738	34.73556992	0.047914626	688.7659062	KRMEPIAIIITDTEIS
30	1000	39	35.99741488	43.23845935	160	1.201154569	3.418300352	0.094959606	35.10378953	62.15599764	75.75994231	160	1.218867771	5.989349328	0.096359958	60.61299309	PALESPRIEITSCLGL
31	1000	40	1008.024672	684.2678703	108	0.678820558	65.84370652	0.065319539	822.7468601	1685.908521	1205.384397	108	0.714976158	115.9881677	0.068798613	1376.033722	ASGLSPRIEITPSHEL
32	1000	41	1014.345424	995.8375836	185	0.981753907	73.21543527	0.072179983	782.2338502	1804.115275	1812.559544	185	1.00468056	133.262028	0.073865584	1391.281514	ASGLSPRIEITGSHEL
33	1000	42	-16.18411501	29.44050921	144	-1.81909911	2.453375768	-0.151591592	-18.10402301	-24.46696558	44.81528306	144	-1.831664941	3.734606921	-0.152638745	-27.36946119	ATDTTPSVVVHVCESD
34	1000	43	323.104389	167.4435334	158	0.518233547	13.32109227	0.041228447	303.8328577	526.9465691	298.6880701	158	0.566828	23.76234698	0.045094414	495.5168899	KRMEPIAIIITDTEIS
35	1000	44	12.63301558	30.80232603	123	2.438240168	2.777352206	0.219848712	10.40090938	19.20642592	47.00109909	123	2.447154889	4.237946385	0.220652525	15.81287494	PALESPRIEITSCLGL
36	1000	45	4035.933201	6083.966039	122	1.507449637	550.8164043	0.136478078	2066.016218	5034.074179	7628.974973	122	1.515467334	690.6949407	0.137203966	2576.970029	ASGLSPRIEITPSHEL
37	1000	46	142.6676888	136.487024	117	0.956677893	12.61822983	0.088444903	98.91299342	345.5668754	349.8704946	117	1.012453796	32.34553867	0.093601387	239.5851111	ASGLSPRIEITGSHEL
38	1000	47	-27.1564027	29.34751963	161	-1.080685095	2.312908562	-0.085169917	-24.59405269	-39.71168006	43.722439	161	-1.100996959	3.445810916	-0.086770716	-35.96467333	ATDTTPSVVVHVCESD
39	1000	48	283.7341819	114.2639	79	0.402714609	12.85569315	0.045308933	283.5593193	402.5326064	192.3644239	79	0.477885321	21.64268859	0.053766299	402.2845295	KRMEPIAIIITDTEIS
49	125	1	489.1481612	148.2465481	153	0.303070848	11.98502307	0.024501826	473.1778029	763.2948822	273.3005568	153	0.3580537	22.09504045	0.028946926	738.373818	AGPHPVIVITGPHEE
50	125	2	-28.51795351	46.39658617	79	-1.626925514	5.220023774	-0.183043421	-33.82949916	-41.42979817	68.09689277	79	-1.643669431	7.661499015	-0.184927259	-49.14620967	AGIVPIHVTHAPGEE
52	125	4	2.507216141	102.1519976	64	40.74319557	12.7689997	5.092899446	-20.02970804	3.927421891	160.0176976	64	40.74369956	20.0022122	5.092962445	-31.37548157	AGPHPVIVINGPHEE
53	125	5	-29.85617982	42.17412602	56	-1.412576099	5.635754648	-0.188763421	-27.48572652	-38.9764285	55.46018538	56	-1.422916042	7.411179011	-0.190145154	-35.88186636	AGPHPVIAVTGPHEE
54	125	6	355.4948203	301.273822	260	0.847477389	18.68420927	0.052558316	277.4573539	459.3547947	395.9589728	260	0.861989419	24.55633305	0.053458314	358.5182079	AGPHPAIVITGPHEE
55	125	7	525.46141	409.5716714	238	0.779451476	26.54858825	0.050524335	437.909001	740.0878906	590.0531417	238	0.797274417	38.24746436	0.051679625	616.7744056	AGPHPAIVITGPHEE
56	125	10	-22.7210935	44.88352475	128	-1.975412175	3.967180589	-0.174603418	-25.2318462	-34.18420328	67.92861105	128	-1.98713454	6.004097689	-0.175639539	-37.96166586	AGPHPVIAVTGPSEE
57	125	12	303.3658121	106.9049563	115	0.35239619	9.96893858	0.032861114	309.7755975	616.3857277	285.1169687	115	0.462562574	26.58729443	0.043134182	629.409279	AGPHPVIVITGPHEE
58	125	13	-26.05647939	58.92441922	164	-2.261411388	4.601224109	-0.176586562	-34.40245917	-36.2473128	82.20306291	164	-2.267838815	6.418980787	-0.17708846	-47.8574515	AGIVPIHVTHAPGEE
59	125	14	466.0211836	280.6757006	163	0.602280992	21.98421756	0.047174288	402.4156628	703.2489121	438.1928427	163	0.62309779	34.32191231	0.048804786	607.2650492	AGPHPVIVVTGPHEE
60	125	15	-8.927343059	68.09648077	160	-7.627855266	5.383499497	-0.603034908	-20.02275852	-11.95539627	91.21704224	160	-7.629779909	7.211340373	-0.603187064	-26.81425043	AGPHPVIVINGPHEE
61	125	16	-34.94166169	13.97778359	145	-0.400032022	1.160791745	-0.033220851	-34.78879973	-52.45540481	23.48437139	145	-0.447701652	1.950270891	-0.037179599	-52.22592414	AGPHPVIAVTGPHEE
62	125	17	414.5758148	440.3612162	132	1.062197071	38.32852415	0.092452388	264.6654775	617.0994752	665.1951903	132	1.07793835	57.89780974	0.093822491	393.9567177	AGPHPAIVITGPHEE
63	125	18	361.3234938	204.8578486	282	0.566965205	12.19910736	0.033762287	313.2703714	497.5674794	292.9954841	282	0.588855776	17.44762718	0.035065851	431.3950012	AGPHPAIVITGPHEE
64	125	21	-26.08184758	57.38673129	166	-2.200255603	4.454074166	-0.170772954	-32.47554076	-35.66146337	78.57672669	166	-2.203407243	6.098736773	-0.171017569	-44.40349955	AGPHPVIAVTGPSEE
65	125	23	317.38071	116.8023318	193	0.368019631	8.407615818	0.026490633	316.8896815	409.740221	165.2976887	193	0.403420705	11.89838799	0.029038858	409.1063005	AGPHPVIVITGPHEE
66	125	24	-21.6378884	72.22783407	101	-3.338026	7.186938107	-0.332146001	-32.44129518	-37.05010574	123.9702262	101	-3.346015449	12.33549855	-0.332940981	-55.5485542	AGIVPIHVTHAPGEE
67	125	25	378.54768	193.3421476	195	0.510747147	13.84551877	0.036575363	335.7052823	517.4521151	279.7153948	195	0.540562859	20.03083547	0.03871051	458.8891111	AGPHPVIVVTGPHEE
68	125	26	-11.31643304	75.02740234	189	-6.629951513	5.457440482	-0.482258011	-20.42189656	-15.25328515	101.1716852	189	-6.632780034	7.359157232	-0.482463755	-27.52643086	AGPHPVIVINGPHEE
69	125	27	-34.46655914	23.11510864	94	-0.670653213	2.384141416	-0.069172597	-34.35923193	-52.92904189	36.72880084	94	-0.693925292	3.788286553	-0.071572929	-52.7642234	AGPHPVIAVTGPHEE
70	125	28	359.5777626	323.4856923	218	0.899626523	21.90921564	0.060930396	261.5797484	507.1600017	465.429898	218	0.91771807	31.52289032	0.062155711	368.9404615	AGPHPAIVITGPHEE
71	125	32	-10.41364288	124.4006561	163	-11.94593069	9.743811387	-0.935677505	-27.82408623	-14.4464768	172.5893303	163	-11.94681116	13.51823965	-0.935746469	-38.59936631	AGPHPVIAVTGPSEE
72	125	33	526.3000834	415.2323599	232	0.788965028	27.26133999	0.051798092	401.6251216	716.3839797	576.1283996	232	0.804217314	37.82468251	0.052799453	546.6801394	AGPHPAIVITGPHEE
73	125	34	-24.9893263	37.34548069	155	-1.494457283	2.999661194	-0.120037698	-26.93204666	-31.18311992	46.90761705	155	-1.504263113	3.767710469	-0.120825321	-33.60735822	PALESPRIEITSCLGL
74	125	35	311.1519604	326.5578921	160	1.049512565	25.81666817	0.082971253	198.3361727	444.2969689	474.3979936	160	1.067749786	37.50445443	0.084413032	283.2061873	ASGLSPRIEITPSHEL
75	125	36	-4.806645401	35.12654883	194	-7.307913502	2.521939232	-0.524677612	-6.747377423	-10.35195718	75.71988084	194	-7.314547342	5.436370622	-0.525153894	-14.53166529	ASGLSPRIEITGSHEL
76	125	37	-32.54245165	51.54030449	246	-1.583786773	3.286089793	-0.100978556	-34.91576206	-40.16196357	63.86134032	246	-1.590095071	4.071650345	-0.101380759	-43.0909625	ATDTTPSVVVHVCESD
77	125	38	33.19481772	44.75561309	130	1.348271091	3.925326937	0.118251197	28.50717481	56.88036606	77.58444594	130	1.363993436	6.804606048	0.119630138	48.84794223	KRMEPIAIIITDTEIS
78	125	39	-16.14650849	65.03188183	227	-4.027612649	4.316317597	-0.267322041	-25.95076921	-27.8798449	112.4374823	227	-4.032930696	7.462737809	-0.267675012	-44.80866071	PALESPRIEITSCLGL
79	125	40	59.21107059	80.22383476	124	1.354878977	7.204313036	0.121671724	41.59723022	99.02976701	136.0025441	124	1.373350137	12.21338901	0.123330483	69.57084168	ASGLSPRIEITPSHEL
80	125	41	43.28261073	80.66201361	231	1.863612482	5.307170857	0.122616699	25.70677048	76.98247294	144.4030689	231	1.875791506	9.501024392	0.12341802	45.72207475	ASGLSPRIEITGSHEL
81	125	42	-28.94702054	68.29992551	158	-2.359480328	5.433650325	-0.187710176	-36.95814517	-43.76178461	103.6796227	158	-2.369181779	8.248307905	-0.188481982	-55.87291397	ATDTTPSVVVHVCESD
82	125	43	19.54332421	64.74896926	253	3.31309907	4.07073282	0.208292754	16.15615184	31.87294258	105.8515415	253	3.321047037	6.654829399	0.208792438	26.34884908	KRMEPIAIIITDTEIS
83	125	44	-27.64537751	40.27906043	176	-1.45699079	3.036148417	-0.109824813	-28.75963976	-42.03025729	61.86268648	176	-1.471860761	4.663075445	-0.110945679	-43.72431009	PALESPRIEITSCLGL
84	125	45	404.8008602	499.0746718	194	1.232889356	35.83147324	0.088516297	220.0886126	504.9135991	627.4459119	194	1.242679764	45.04799115	0.089219207	274.5195093	ASGLSPRIEITPSHEL
85	125	46	-3.058093263	60.05600086	163	-19.63838108	4.703949026	-1.53819672	-12.71784672	-7.407253473	145.487178	163	-19.64117719	11.39543525	-1.538415729	-30.80491867	ASGLSPRIEITGSHEL
86	125	47	-37.55184035	108.1637724	179	-2.880385392	8.084539925	-0.215290112	-35.56933265	-54.91326249	158.5932102	179	-2.888067526	11.85381307	-0.215864302	-52.01417779	ATDTTPSVVVHVCESD
87	125	48	11.81248289	18.1739169	94	1.538534876	1.874496402	0.158687756	9.512935883	16.75832462	26.14129381	94	1.559899	2.696268584	0.160891297	13.49596601	KRMEPIAIIITDTEIS
97	2000	1	7118.00231	1525.927149	138	0.214375759	129.8955451	0.018248877	7061.68611	11107.33959	3186.615765	138	0.286892801	271.2627481	0.024421937	11019.46055	AGPHPVIVITGPHEE
98	2000	2	-32.36280208	551.5821498	43	-17.04370803	84.11548926	-2.599141108	-12.26256246	-47.01544793	801.3930959	43	-17.04531449	122.2113014	-2.599386091	-17.81458433	AGIVPIHVTHAPGEE
100	2000	4	521.8736904	580.2317155	34	1.111824041	99.50891826	0.19067625	372.6741811	817.4876202	923.8771087	34	1.130142018	158.443617	0.193817757	583.7744553	AGPHPVIVINGPHEE
101	2000	5	14.49024367	163.9655329	41	11.31558148	25.60711409	1.767196927	6.784578037	18.91661793	214.0770366	41	11.31687691	33.43321614	1.76739924	8.857081594	AGPHPVIAVTGPHEE
102	2000	6	6673.150612	2828.551994	196	0.423870546	202.0394281	0.030276468	6315.535673	8622.752161	3899.105885	196	0.452188096	278.5075632	0.03229915	8160.657842	AGPHPAIVITGPHEE
103	2000	7	10015.20993	8303.416695	187	0.829080644	607.2059655	0.060628381	8013.627261	14105.95611	11931.64293	187	0.845858503	872.5281446	0.0618553	11286.82027	AGPHPAIVITGPHEE
104	2000	10	-75.92483574	1921.620335	88	-25.30950928	204.845416	-2.698002755	95.34982032	-114.2299783	2891.209518	88	-25.31042691	308.2039702	-2.698100575	143.4551396	AGPHPVIAVTGPSEE
105	2000	12	5386.4682	1590.742262	111	0.295321944	150.9865738	0.028030718	5467.775751	10944.35163	4604.38786	111	0.420709057	437.0291553	0.039931937	11109.55421	AGPHPVIVITGPHEE
106	2000	13	-72.19021103	685.9003604	127	-9.501293189	60.86381496	-0.843103436	-12.42359569	-100.4242024	954.313625	127	-9.502825038	84.68164072	-0.843239365	-17.28253278	AGIVPIHVTHAPGEE
107	2000	14	8380.249544	3923.382809	120	0.468170165	358.1542111	0.042737893	7542.038551	12646.20919	6255.615381	120	0.494663285	571.0569426	0.045156373	11381.30753	AGPHPVIVVTGPHEE
108	2000	15	456.9109521	771.1638251	153	1.687777063	62.3449001	0.136448688	381.5534892	611.8899493	1038.043285	153	1.696454217	83.92082564	0.137150195	510.9720921	AGPHPVIVINGPHEE
109	2000	16	-68.74661516	647.187312	101	-9.414097122	64.39754444	-0.936737675	-1.112379897	-103.2043513	971.7972699	101	-9.416243188	96.69744249	-0.936951216	-1.669935972	AGPHPVIAVTGPHEE
110	2000	17	7125.453714	4456.009328	94	0.625364995	459.6022694	0.064501474	5888.231609	10606.29586	6912.586474	94	0.651743697	712.9788556	0.06722223	8764.680682	AGPHPAIVITGPHEE
111	2000	18	6523.75436	2427.131845	266	0.372045253	148.8170016	0.022811558	6136.231726	8983.661646	3634.990353	266	0.404622357	222.8755584	0.024808988	8450.016136	AGPHPAIVITGPHEE
112	2000	21	-110.0555397	809.5033859	149	-7.355407896	66.31710135	-0.602578494	11.63256204	-150.477898	1106.968276	149	-7.356351275	90.68637471	-0.602655778	15.90509199	AGPHPVIAVTGPSEE
113	2000	23	5637.472693	1287.22553	164	0.228333794	100.5154267	0.017829874	5575.758049	7278.007876	2051.393218	164	0.281861912	160.186898	0.022009718	7198.333936	AGPHPVIVITGPHEE
114	2000	24	-8.599860758	568.0023853	99	-66.04785836	57.08638764	-6.638059527	-24.0350438	-14.7253625	972.5846096	99	-66.04826263	97.74843112	-6.638100157	-41.15470502	AGIVPIHVTHAPGEE
115	2000	25	6373.345719	1874.712556	193	0.294148888	134.9447626	0.0211733	6162.10606	8711.983713	2991.00462	193	0.343320731	215.2972236	0.024712767	8423.23169	AGPHPVIVVTGPHEE
116	2000	26	553.6696865	1079.541924	170	1.949794164	82.79708593	0.149542386	539.8697251	746.2847685	1462.263297	170	1.959390515	112.1504753	0.150278392	727.6839649	AGPHPVIVINGPHEE
117	2000	27	-43.95453287	696.5390079	100	-15.8468072	69.65390079	-1.58468072	40.44492176	-67.49937823	1069.717264	100	-15.84780915	106.9717264	-1.584780915	62.10979604	AGPHPVIAVTGPHEE
118	2000	28	6898.517052	3929.94171	165	0.569679205	305.9455472	0.044349466	5558.470496	9729.889564	5816.919669	165	0.597840256	452.8465821	0.046541801	7839.844951	AGPHPAIVITGPHEE
119	2000	32	142.5098008	1430.631745	115	10.03883057	133.4070981	0.936125777	81.75163846	197.6987837	1984.871727	115	10.03987829	185.0902429	0.936223478	113.4111436	AGPHPVIAVTGPSEE
120	2000	33	10123.69095	8504.434443	225	0.840052752	566.9622962	0.056003517	7975.618552	13780.06624	11773.5994	225	0.854393527	784.9066264	0.056959568	10856.17415	AGPHPAIVITGPHEE
121	2000	34	429.5820386	4103.272283	145	9.55177804	340.7582157	0.793231991	163.4745555	536.0571975	5121.124421	145	9.553317155	425.2862349	0.793359807	203.9929611	PALESPRIEITSCLGL
122	2000	35	9511.14436	10119.80421	152	1.063994386	820.82451	0.086301341	5644.470831	13581.05732	14694.5348	152	1.08198754	1191.884159	0.087760778	8059.795857	ASGLSPRIEITPSHEL
123	2000	36	1002.534087	822.1215572	135	0.820043496	70.75695777	0.070578107	847.0668958	2159.133671	1893.985355	135	0.877196896	163.0083053	0.075497088	1824.307703	ASGLSPRIEITGSHEL
124	2000	37	22.67291474	489.6490599	246	21.59621141	31.21888382	1.376924148	15.40553959	27.98156652	604.3087968	246	21.59667495	38.52932164	1.376953703	19.01260319	ATDTTPSVVVHVCESD
125	2000	38	1155.325729	836.1030881	123	0.723694684	75.3888766	0.065253352	1122.557138	1979.687039	1489.873526	123	0.752580331	134.3373718	0.067857883	1923.537026	KRMEPIAIIITDTEIS
126	2000	39	-52.09313026	1289.054603	148	-24.74519378	105.9596357	-2.034042399	128.6047797	-89.94813912	2225.862041	148	-24.74605992	182.9647327	-2.034113596	222.0592343	PALESPRIEITSCLGL
127	2000	40	2571.002734	1543.824576	90	0.600475665	162.733399	0.063295693	2090.896383	4299.96957	2756.56082	90	0.641065192	290.5670233	0.067574205	3496.997768	ASGLSPRIEITPSHEL
128	2000	41	3506.274608	3323.615913	141	0.947905194	279.8989526	0.079828018	2672.173373	6236.261759	6059.344445	141	0.971630871	510.2888565	0.08182608	4752.728888	ASGLSPRIEITGSHEL
129	2000	42	72.72837938	861.4898599	146	11.84530533	71.29740811	0.980324444	41.32094219	109.9499573	1302.603707	146	11.84724159	107.8042498	0.98048469	62.46854211	ATDTTPSVVVHVCESD
130	2000	43	813.2376092	858.6990838	195	1.055901835	61.49271862	0.075614701	874.0067798	1326.298195	1433.173465	195	1.08058163	102.6316836	0.077382058	1425.405812	KRMEPIAIIITDTEIS
131	2000	44	-151.7921709	2895.983599	126	-19.0786098	257.9947244	-1.69965765	81.91589897	-230.7750724	4403.130953	126	-19.07975115	392.2620822	-1.699759329	124.5396742	PALESPRIEITSCLGL
132	2000	45	8058.131075	10306.97123	133	1.279077138	893.7277513	0.110910054	4591.81685	10051.0161	12950.90159	133	1.28851665	1122.985588	0.111728563	5727.435388	ASGLSPRIEITPSHEL
133	2000	46	568.0155925	765.9724054	149	1.348505949	62.75090447	0.110473912	435.2365582	1375.836219	1910.529981	149	1.388631841	156.5167145	0.113761153	1054.221448	ASGLSPRIEITGSHEL
134	2000	47	-2.519155209	458.7694954	166	-182.1124374	35.6074185	-14.1346664	20.21182838	-3.68384159	670.8738192	166	-182.1125591	52.06990674	-14.13467585	29.55640594	ATDTTPSVVVHVCESD
135	2000	48	634.1997707	1345.471736	67	2.121526682	164.3755343	0.259185736	829.0921009	899.7368065	1922.801085	67	2.137070609	234.9075402	0.261084729	1176.229815	KRMEPIAIIITDTEIS
145	250	1	1296.336351	291.8665694	148	0.225147254	23.99128422	0.01850699	1297.586064	2022.87769	596.8065127	148	0.295028471	49.05719315	0.024251191	2024.827814	AGPHPVIVITGPHEE
146	250	2	-39.73186792	59.78460355	94	-1.504701558	6.16631103	-0.155198116	-44.89975628	-57.7209465	87.89687943	94	-1.522789988	9.065870892	-0.157063795	-65.22865815	AGIVPIHVTHAPGEE
148	250	4	-2.960946336	24.19522671	44	-8.171450599	3.647567669	-1.231892529	-5.483500842	-4.63816632	37.91220047	44	-8.173963125	5.715479269	-1.232271306	-8.589614951	AGPHPVIVINGPHEE
149	250	5	-26.83024499	31.12878155	41	-1.160212348	4.861498918	-0.181194727	-26.24931967	-35.0261531	41.07795083	41	-1.1727794	6.415298112	-0.183157371	-34.26777095	AGPHPVIAVTGPHEE
150	250	6	927.4687692	618.479219	260	0.66684641	38.35645289	0.041356059	760.1066328	1198.434413	821.1610758	260	0.68519484	50.92624805	0.04249398	982.1764098	AGPHPAIVITGPHEE
151	250	7	1354.164756	954.6367949	221	0.704963551	64.21582001	0.04742098	1199.713005	1907.277905	1382.053503	221	0.724620937	92.9669791	0.048743279	1689.739818	AGPHPAIVITGPHEE
152	250	10	-2.1660382	62.19151995	117	-28.71210671	5.749608053	-2.654435205	-14.51471633	-3.258834797	93.57064849	117	-28.7129156	8.650609513	-2.654509986	-21.83759392	AGPHPVIAVTGPSEE
153	250	12	873.8879224	249.4615656	129	0.285461738	21.96386615	0.025133505	865.0333705	1775.585849	734.8211446	129	0.413847151	64.69739428	0.03643721	1757.594964	AGPHPVIVITGPHEE
154	250	13	-36.8917252	52.22638416	162	-1.415666626	4.103292266	-0.111225275	-39.05368576	-51.32028327	73.17817879	162	-1.425911436	5.749420718	-0.112030183	-54.32779857	AGIVPIHVTHAPGEE
155	250	14	1522.067665	951.6766423	125	0.625252519	85.12054659	0.055924285	1232.680658	2296.87505	1482.239469	125	0.645328734	132.5755285	0.057719957	1860.175808	AGPHPVIVVTGPHEE
156	250	15	-12.29343143	146.1992347	175	-11.89246757	11.05162334	-0.898986048	-3.825266086	-16.46322352	195.8086768	175	-11.89370213	14.80174466	-0.899079372	-5.122752826	AGPHPVIVINGPHEE
157	250	16	-41.33308469	61.52580214	155	-1.488536425	4.94187135	-0.119562123	-39.8213585	-62.0503887	93.20273755	155	-1.502049214	7.486224031	-0.120647496	-59.78094284	AGPHPVIAVTGPHEE
158	250	17	1062.863787	747.8161708	133	0.703586085	64.84388571	0.061008651	844.0790904	1582.081399	1150.382994	133	0.727132621	99.75085632	0.063050395	1256.418597	AGPHPAIVITGPHEE
159	250	18	1007.241412	412.2266449	292	0.409263003	24.12373971	0.023950306	900.5950376	1387.041195	609.0323784	292	0.439087448	35.64092412	0.025695649	1240.18175	AGPHPAIVITGPHEE
160	250	21	-34.36119669	50.76213789	157	-1.477309954	4.051259647	-0.11790217	-36.42329295	-46.98173905	69.62692867	157	-1.481999817	5.556833858	-0.118276462	-49.80122376	AGPHPVIAVTGPSEE
161	250	23	889.3553251	297.9419094	174	0.335008855	22.58691786	0.025396956	893.5725498	1148.162557	428.8978853	174	0.373551535	32.51466477	0.028318869	1153.607017	AGPHPVIVITGPHEE
162	250	24	-41.5537605	27.29256753	113	-0.656801387	2.567468783	-0.061786677	-40.846313	-71.15163883	49.54064708	113	-0.696268532	4.660392055	-0.065499434	-69.9402912	AGIVPIHVTHAPGEE
163	250	25	1034.799848	457.5178442	191	0.442131727	33.10482935	0.031991529	922.7128398	1414.509713	673.6780088	191	0.476262554	48.74562993	0.034461149	1261.293453	AGPHPVIVVTGPHEE
164	250	26	-1.119395413	47.95518243	168	-42.84025274	3.699822648	-3.305197255	1.094529658	-1.50881973	64.63887918	168	-42.84069057	4.986997797	-3.305231035	1.475303474	AGPHPVIVINGPHEE
165	250	27	-40.05401548	22.70834192	118	-0.566942956	2.090472318	-0.052191329	-37.72371455	-61.50949547	36.55449301	118	-0.594290243	3.365113843	-0.054708851	-57.93093704	AGPHPVIAVTGPHEE
166	250	28	924.487848	600.5875127	201	0.649643491	42.3621769	0.045822319	767.8966547	1303.927293	879.4651184	201	0.674474047	62.03268656	0.047573731	1083.066055	AGPHPAIVITGPHEE
167	250	32	-33.89116106	62.93430322	128	-1.856953296	5.562659072	-0.164133033	-30.35141058	-47.01600366	87.57243451	128	-1.862609063	7.740382786	-0.164632937	-42.10543358	AGPHPVIAVTGPSEE
168	250	33	1373.038588	1078.730878	250	0.785652266	68.22493111	0.049689012	1114.733238	1868.939184	1496.959801	250	0.800967637	94.67605073	0.050657641	1517.341643	AGPHPAIVITGPHEE
169	250	34	-17.53425736	26.2298312	165	-1.49591914	2.041989589	-0.116457147	-16.70418707	-21.88025573	32.94543911	165	-1.50571545	2.564798956	-0.117219789	-20.84444624	PALESPRIEITSCLGL
170	250	35	901.2659181	1082.156414	179	1.20070713	80.88416798	0.089745065	540.9354381	1286.926539	1565.777979	179	1.216680153	117.0317409	0.090938944	772.4070747	ASGLSPRIEITPSHEL
171	250	36	39.26552623	100.4315368	172	2.557753492	7.657832889	0.195026875	28.83092832	84.56522418	217.8946692	172	2.576646267	16.61431277	0.196467436	62.09248039	ASGLSPRIEITGSHEL
172	250	37	-39.62738069	25.9526847	241	-0.654917995	1.671759382	-0.042186977	-37.08790103	-48.90576274	32.76829799	241	-0.670029382	2.110791628	-0.043160387	-45.77168758	ATDTTPSVVVHVCESD
173	250	38	92.27907785	50.82556771	124	0.550781053	4.56427072	0.049461599	90.3618011	158.1231074	93.01119566	124	0.588220135	8.352651944	0.052823728	154.8377933	KRMEPIAIIITDTEIS
174	250	39	-20.49848129	58.36069272	196	-2.847073981	4.168620909	-0.203362427	-21.88479782	-35.39430703	101.0363126	196	-2.854592195	7.21687947	-0.203899442	-37.78803135	PALESPRIEITSCLGL
175	250	40	202.1213917	179.035269	104	0.885780903	17.5558525	0.086857964	145.6664941	338.0454725	308.9005749	104	0.913784091	30.29019345	0.089603902	243.6253699	ASGLSPRIEITPSHEL
176	250	41	217.612343	203.9014187	190	0.936993812	14.79256366	0.067976676	152.2557382	387.0454213	371.9463596	190	0.960988915	26.98382502	0.069717463	270.8021316	ASGLSPRIEITGSHEL
177	250	42	-51.62210717	116.8161721	159	-2.262909797	9.26412505	-0.17946042	-37.61118048	-78.04172909	177.3906808	159	-2.273023457	14.06799607	-0.180262486	-56.86016551	ATDTTPSVVVHVCESD
178	250	43	74.98484584	67.11342796	217	0.895026551	4.555956355	0.060758361	68.92345623	122.2917688	112.9992157	217	0.924013258	7.670886595	0.062726107	112.4063307	KRMEPIAIIITDTEIS
179	250	44	-26.35507945	32.09915973	162	-1.217949648	2.521948168	-0.095691162	-22.94484233	-40.06857094	49.51271351	162	-1.235699511	3.890086165	-0.097085723	-34.88386535	PALESPRIEITSCLGL
180	250	45	891.2999692	999.3527599	180	1.121230556	74.48735682	0.083571591	646.6400279	1111.730531	1258.464618	180	1.131987098	93.80041441	0.084373337	806.5628704	ASGLSPRIEITPSHEL
181	250	46	20.00435381	62.12916104	186	3.105781953	4.555531113	0.227726982	12.46651156	48.45415313	151.342354	186	3.123413459	11.0969598	0.229019786	30.1961396	ASGLSPRIEITGSHEL
182	250	47	-38.24535939	59.98478261	212	-1.568419897	4.119771784	-0.107719521	-40.81773018	-55.92741765	88.50423284	212	-1.582483808	6.078495668	-0.108685434	-59.6890781	ATDTTPSVVVHVCESD
183	250	48	54.29170657	59.40384446	86	1.094160567	6.405681287	0.117986368	56.91268854	77.02343795	86.57457283	86	1.124002968	9.335576277	0.121204357	80.74181512	KRMEPIAIIITDTEIS
193	500	1	2489.887704	495.7481802	140	0.199104634	41.89836838	0.016827413	2481.568975	3885.363766	1071.072729	140	0.275668584	90.52216739	0.023298248	3872.382744	AGPHPVIVITGPHEE
194	500	2	5.618905799	150.8022196	73	26.83836052	17.65006478	3.141192504	-18.77963872	8.162932628	219.0880567	73	26.83938073	25.64231749	3.14131191	-27.28234484	AGIVPIHVTHAPGEE
196	500	4	48.87889528	125.646449	55	2.570566463	16.94216372	0.346615111	63.7318587	76.56621231	197.4292147	55	2.578542267	26.62134987	0.347690568	99.83259639	AGPHPVIVINGPHEE
197	500	5	10.32327217	47.31902268	35	4.583723253	7.99837467	0.774790642	-5.127015846	13.47675027	61.81677918	35	4.586920284	10.44894279	0.775331039	-6.693179359	AGPHPVIAVTGPHEE
198	500	6	1932.450235	1174.957573	293	0.608014402	68.64175436	0.035520581	1654.541856	2497.027328	1568.342587	293	0.62808387	91.62355221	0.036693051	2137.926325	AGPHPAIVITGPHEE
199	500	7	2578.637291	1374.941331	248	0.533204626	87.30886182	0.033858528	2271.543175	3631.890367	2029.99302	248	0.558935655	128.9046857	0.03549245	3199.362627	AGPHPAIVITGPHEE
200	500	10	54.56799287	94.64306492	107	1.734406196	9.14949043	0.167671376	34.05728632	82.09830924	143.4869725	107	1.747745767	13.8714092	0.168960961	51.23966408	AGPHPVIAVTGPSEE
201	500	12	1679.167225	411.9833075	141	0.245349779	34.69525339	0.020662179	1654.831523	3411.771105	1321.274487	141	0.387269382	111.2713848	0.032613965	3362.325258	AGPHPVIVITGPHEE
202	500	13	-9.964861242	102.3522605	173	-10.27131819	7.78169827	-0.780913861	-10.80736387	-13.86217367	142.4024396	173	-10.27273522	10.826657	-0.781021596	-15.03418374	AGIVPIHVTHAPGEE
203	500	14	2862.588379	1436.547933	137	0.501835312	122.7325727	0.042874684	2468.876531	4319.786812	2274.962083	137	0.526637582	194.3631277	0.044993685	3725.656248	AGPHPVIVVTGPHEE
204	500	15	52.64638782	265.0583435	160	5.034691923	20.95470196	0.398027345	62.52040623	70.50344366	355.1686691	160	5.037607394	28.0785487	0.398257833	83.72661679	AGPHPVIVINGPHEE
205	500	16	-14.72723176	42.48034236	161	-2.884475716	3.347919988	-0.227328533	-12.77283554	-22.10893433	63.9273683	161	-2.891472169	5.03818242	-0.227879931	-19.17493978	AGPHPVIAVTGPHEE
206	500	17	2207.950108	1789.896596	149	0.810659892	146.6340426	0.066411846	1606.490543	3286.55171	2731.711577	149	0.831178639	223.7905322	0.068092807	2391.274251	AGPHPAIVITGPHEE
207	500	18	1934.995296	720.0138133	324	0.372101066	40.0007674	0.020672281	1816.943377	2664.622558	1078.302609	324	0.404673677	59.9057005	0.022481871	2502.056887	AGPHPAIVITGPHEE
208	500	21	11.71573143	149.1273688	170	12.72881421	11.43754707	0.976255485	-11.35119537	16.01880872	203.9091728	170	12.72935937	15.63911965	0.976297297	-15.52038201	AGPHPVIAVTGPSEE
209	500	23	1788.584813	508.7441432	206	0.284439485	35.44588404	0.019817838	1780.25021	2309.072711	759.5959112	206	0.328961452	52.92355488	0.02291983	2298.312693	AGPHPVIVITGPHEE
210	500	24	72.47125359	598.7687154	116	8.262154796	55.59427954	0.767121814	-12.25544607	124.0910184	1025.660151	116	8.265385876	95.2301543	0.767421813	-20.9847451	AGIVPIHVTHAPGEE
211	500	25	2194.516366	987.6899041	211	0.450071788	67.99537713	0.03098422	2032.403838	2999.773067	1450.818064	211	0.483642606	99.87843453	0.03329533	2778.174905	AGPHPVIVVTGPHEE
212	500	26	88.52209784	166.828092	206	1.884592617	11.62346394	0.131305789	69.46907423	119.3178801	226.0500224	206	1.894519264	15.74965135	0.131997412	93.63653679	AGPHPVIVINGPHEE
213	500	27	-6.142271144	139.8924246	110	-22.77535806	13.33821934	-2.171545187	-21.52972541	-9.432462503	214.8342868	110	-22.77605522	20.48364554	-2.171611658	-33.06241664	AGPHPVIAVTGPHEE
214	500	28	1877.564931	1390.521727	226	0.740598476	92.49612937	0.049263878	1436.867446	2648.177759	2019.16335	226	0.762472739	134.3127481	0.050718932	2026.603902	AGPHPAIVITGPHEE
215	500	32	68.05397064	364.6052568	125	5.357589769	32.61128557	0.479197397	11.68725697	94.40885567	505.989237	125	5.359552696	45.25705319	0.479372966	16.21331637	AGPHPVIAVTGPSEE
216	500	33	2656.915892	2099.122555	223	0.790059844	140.5676433	0.05290632	2139.287907	3616.514685	2912.348153	223	0.805291394	195.0252572	0.0539263	2911.934907	AGPHPAIVITGPHEE
217	500	34	40.63609257	139.0236724	173	3.42118702	10.56977409	0.260108033	34.87461693	50.7080556	173.6995216	173	3.425481801	13.20613008	0.260434559	43.51855464	PALESPRIEITSCLGL
218	500	35	2022.601463	2472.991525	220	1.2226786	166.7290546	0.082432974	1118.499429	2888.09268	3576.522299	220	1.238368257	241.1290842	0.083490771	1597.116423	ASGLSPRIEITPSHEL
219	500	36	159.9596522	127.1756835	177	0.795048512	9.559109738	0.059759506	134.3297016	344.501275	294.1615671	177	0.85387657	22.11053735	0.064181293	289.3026636	ASGLSPRIEITGSHEL
220	500	37	0.302056126	177.8810106	272	588.9005222	10.78562052	35.70733906	0.820463367	0.372779755	219.5301986	272	588.9005392	13.31097348	35.70734009	1.012567222	ATDTTPSVVVHVCESD
221	500	38	284.328783	129.0441186	175	0.453855277	9.754818457	0.034308234	277.3270669	487.2063283	242.9336858	175	0.498625883	18.3640605	0.037692574	475.2086672	KRMEPIAIIITDTEIS
222	500	39	9.1276239	269.8578774	191	29.56496459	19.52623071	2.139245758	31.85793909	15.7604809	465.9694851	191	29.56568953	33.71636863	2.139298213	55.00844973	PALESPRIEITSCLGL
223	500	40	623.2004033	418.0064272	120	0.670741586	38.15859156	0.06123005	495.8274613	1042.294796	737.2258241	120	0.70731028	67.29920231	0.064568299	829.2651608	ASGLSPRIEITPSHEL
224	500	41	451.1266061	434.5995356	191	0.963364895	31.44651874	0.069706637	328.0786583	802.3740056	791.7176068	191	0.986718913	57.28667548	0.071396475	583.5208645	ASGLSPRIEITGSHEL
225	500	42	-6.580761047	92.52182118	174	-14.05944092	7.014061163	-1.065843466	0.167462561	-9.948721565	139.8896931	174	-14.06107229	10.60501027	-1.06596714	0.253168043	ATDTTPSVVVHVCESD
226	500	43	210.6604425	153.1482734	217	0.726991131	10.39638222	0.049351374	220.0108401	343.5632607	261.9304484	217	0.76239365	17.78099744	0.051754653	358.8126974	KRMEPIAIIITDTEIS
227	500	44	-8.388656651	301.871263	166	-35.9856501	23.42975395	-2.793028124	22.79613037	-12.75357507	458.9534074	166	-35.98625523	35.62169284	-2.793075091	34.65777323	PALESPRIEITSCLGL
228	500	45	1848.186695	1925.54713	189	1.041857479	140.0629441	0.07578398	1226.309825	2305.268312	2428.42684	189	1.053424813	176.6420606	0.07662538	1529.592864	ASGLSPRIEITPSHEL
229	500	46	115.3329237	171.576793	184	1.487665339	12.648809	0.109672144	83.36558174	279.3571438	425.7771535	184	1.524131969	31.3887082	0.112360499	201.9264757	ASGLSPRIEITGSHEL
230	500	47	-7.2840046	127.5031373	182	-17.50453827	9.451161338	-1.297522703	0.285499483	-10.65163392	186.4654159	182	-17.50580401	13.82173621	-1.297616526	0.417495065	ATDTTPSVVVHVCESD
231	500	48	191.5321769	76.84535313	84	0.401213803	8.384515417	0.043776015	192.0693034	271.7259721	129.5103793	84	0.476621275	14.13074087	0.052003645	272.4879913	KRMEPIAIIITDTEIS
241	63	1	193.9001322	83.44138878	132	0.430331779	7.262640684	0.037455574	179.7422777	302.5729018	142.4138211	132	0.470676059	12.39553208	0.040967093	280.4801726	AGPHPVIVITGPHEE
242	63	2	-29.08969524	48.83391703	60	-1.678735945	6.304431579	-0.216723879	-34.9865203	-42.26040281	71.63003569	60	-1.694968125	9.247397843	-0.218819444	-50.82708597	AGIVPIHVTHAPGEE
244	63	4	3.400045667	108.6808061	46	31.96451363	16.02411064	4.712910417	-25.96871253	5.325992269	170.2461739	46	31.96515603	25.10142891	4.713005134	-40.67861897	AGPHPVIVINGPHEE
245	63	5	-29.42852076	11.8920048	36	-0.404097946	1.9820008	-0.067349658	-32.94147855	-38.41813125	16.86087608	36	-0.43887809	2.810146013	-0.073146348	-43.00420185	AGPHPVIAVTGPHEE
246	63	6	125.8520553	121.9303409	207	0.968838694	8.474744528	0.067338944	92.57173355	162.6204988	159.6214634	207	0.981558073	11.09445864	0.068223002	119.6171287	AGPHPAIVITGPHEE
247	63	7	205.1530716	150.6802792	188	0.734477325	10.98948883	0.053567264	173.7490093	288.9485339	217.6837144	188	0.753365007	15.87621657	0.05494479	244.7173766	AGPHPAIVITGPHEE
248	63	10	-18.16691216	54.94584551	94	-3.024501084	5.667231246	-0.311953468	-26.28247898	-27.33237368	82.87641394	94	-3.032170382	8.548049415	-0.312744495	-39.54235759	AGPHPVIAVTGPSEE
249	63	12	118.8384751	88.21055546	111	0.742272697	8.372575402	0.070453407	109.917009	241.4587836	193.2801499	111	0.800468498	18.34533997	0.075977108	223.3319408	AGPHPVIVITGPHEE
250	63	13	-30.2534608	44.36425026	150	-1.466419017	3.622325866	-0.119732611	-34.16471221	-42.08575689	62.13169423	150	-1.476311675	5.07303159	-0.120540343	-47.52672039	AGIVPIHVTHAPGEE
251	63	14	207.9204463	144.3945192	101	0.694470033	14.36779166	0.069102351	169.0833015	313.7621911	223.5865695	101	0.712598828	22.24769519	0.070906234	255.1550273	AGPHPVIVVTGPHEE
252	63	15	-19.51544531	62.48843527	147	-3.201998943	5.153959275	-0.264096422	-28.85902638	-26.13486235	83.80355721	147	-3.206581159	6.912000902	-0.264474356	-38.64767983	AGPHPVIVINGPHEE
253	63	16	-33.78210562	34.74528492	144	-1.028511524	2.89544041	-0.085709294	-34.2557661	-50.71464664	53.14757302	144	-1.047972855	4.428964418	-0.087331071	-51.42571908	AGPHPVIAVTGPHEE
254	63	17	150.7294713	166.5490465	98	1.104953431	16.82399431	0.111617152	82.81286322	224.362045	251.306579	98	1.120093993	25.38579802	0.11314658	123.267621	AGPHPAIVITGPHEE
255	63	18	140.6077786	103.746721	278	0.737844819	6.222314829	0.044252991	113.0610544	193.6266509	146.1485647	278	0.754795706	8.765408421	0.045269638	155.6929035	AGPHPAIVITGPHEE
256	63	21	-30.09324778	43.5007929	171	-1.445533338	3.326588776	-0.110542697	-33.41117599	-41.1462129	59.6754207	171	-1.450325959	4.563493478	-0.110909198	-45.68278474	AGPHPVIAVTGPSEE
257	63	23	131.7023296	78.63572211	157	0.597071611	6.275813847	0.047651502	120.153994	170.0284231	105.3359118	157	0.61951943	8.40672097	0.049443033	155.1194591	AGPHPVIVITGPHEE
258	63	24	-28.97933457	103.7674949	106	-3.580741118	10.07879007	-0.347792322	-33.75995761	-49.62071115	178.0485484	106	-3.588190179	17.29360379	-0.348515839	-57.80647242	AGIVPIHVTHAPGEE
259	63	25	141.8045821	104.37465	191	0.736045679	7.552284619	0.053258396	111.7737674	193.8384115	146.7433333	191	0.757039496	10.61797495	0.054777455	152.7880778	AGPHPVIVVTGPHEE
260	63	26	-31.25841236	31.30198171	166	-1.001393844	2.429504956	-0.077723236	-28.92787771	-42.13284128	42.97350585	166	-1.019952715	3.335390915	-0.079163684	-38.99154142	AGPHPVIVINGPHEE
261	63	27	-28.25256155	40.08206736	88	-1.418705603	4.272762737	-0.151234525	-31.58409474	-43.3864317	62.03625841	88	-1.429853896	6.613087367	-0.152422938	-48.50254611	AGPHPVIAVTGPHEE
262	63	28	124.6104721	132.0885191	181	1.060011385	9.8180623	0.078790026	76.30681337	175.7546039	189.0079352	181	1.07540816	14.04884918	0.079934459	107.6255754	AGPHPAIVITGPHEE
263	63	32	-16.38561911	79.17301399	124	-4.831859783	7.109946545	-0.433913818	-32.11337463	-22.73118725	109.8833819	124	-4.834036195	9.867818998	-0.434109265	-44.54974371	AGPHPVIAVTGPSEE
264	63	33	191.4377477	159.2288808	213	0.83175279	10.91018314	0.056990762	157.7719254	260.5793536	220.5111694	213	0.846234233	15.10917637	0.057983014	214.7544402	AGPHPAIVITGPHEE
265	63	34	-25.79463098	44.6610734	150	-1.731409666	3.646561373	-0.141369007	-31.35878885	-32.18802545	56.00331985	150	-1.739880563	4.572651918	-0.142060653	-39.13130196	PALESPRIEITSCLGL
266	63	35	143.9306728	177.6501366	168	1.234275733	13.7060056	0.09522644	77.91376501	205.5200346	256.8630113	168	1.249819813	19.81741156	0.096425692	111.2538375	ASGLSPRIEITPSHEL
267	63	36	-25.41089621	25.34759396	176	-0.997508854	1.910646784	-0.075190059	-24.98936527	-54.72683907	57.18959852	176	-1.045000944	4.310828186	-0.07876991	-53.81899797	ASGLSPRIEITGSHEL
268	63	37	-30.43623429	57.09833933	232	-1.875998811	3.74868963	-0.123165356	-38.07514146	-37.56259503	70.66754468	232	-1.881327545	4.639551606	-0.123515204	-46.99008116	ATDTTPSVVVHVCESD
269	63	38	18.73723111	86.33846359	129	4.607856043	7.601677852	0.405699103	-0.321478813	32.10683588	148.0921687	129	4.612480946	13.03878842	0.406106303	-0.550864076	KRMEPIAIIITDTEIS
270	63	39	-25.42983097	63.12632628	163	-2.482373019	4.944435473	-0.194434461	-32.35499089	-43.90916734	109.3773935	163	-2.490992202	8.567098641	-0.195109567	-55.86669888	PALESPRIEITSCLGL
271	63	40	14.49205139	62.75168912	99	4.330076359	6.306782054	0.435189048	-0.088791839	24.23777274	105.0923521	99	4.335891469	10.56217879	0.435773489	-0.148503229	ASGLSPRIEITPSHEL
272	63	41	0.468436553	56.6556057	158	120.9461672	4.50727798	9.621960429	-12.05556396	0.833161486	100.7678453	158	120.9463554	8.016659333	9.621975407	-21.44203205	ASGLSPRIEITGSHEL
273	63	42	-33.29410036	44.5887128	153	-1.339237652	3.604783776	-0.108270947	-37.74323548	-50.33365167	68.26535483	153	-1.35625675	5.518926834	-0.10964686	-57.05980479	ATDTTPSVVVHVCESD
274	63	43	-3.156425768	42.78881087	183	-13.55609605	3.163039915	-1.002095455	-6.560369926	-5.147772007	69.79370245	183	-13.55804071	5.159298943	-1.002239209	-10.6992184	KRMEPIAIIITDTEIS
275	63	44	-28.30391418	50.74791899	132	-1.7929647	4.417039391	-0.156057546	-33.04480786	-43.03145417	77.67474699	132	-1.805069071	6.760718942	-0.157111096	-50.23920457	PALESPRIEITSCLGL
276	63	45	123.1039818	171.3228424	184	1.391692129	12.63008751	0.102596905	64.26383726	153.5492648	215.0262048	184	1.400372741	15.85194213	0.103236848	80.15715516	ASGLSPRIEITPSHEL
277	63	46	-23.45821573	33.74239376	156	-1.438404103	2.701553609	-0.115164497	-27.28944216	-56.82002967	83.87137698	156	-1.476088229	6.715084377	-0.118181642	-66.09995114	ASGLSPRIEITGSHEL
278	63	47	-28.74357768	70.50088213	185	-2.452752504	5.183327942	-0.180329951	-37.52351988	-42.03265702	103.4747114	185	-2.461769461	7.607612084	-0.18099289	-54.87184855	ATDTTPSVVVHVCESD
279	63	48	13.27607448	92.18843856	64	6.943953102	11.52355482	0.867994138	-9.964285451	18.83471645	130.8771307	64	6.948717868	16.35964134	0.868589733	-14.13629393	KRMEPIAIIITDTEIS
