# Supplementary material for: Quantitative mapping of protein-peptide affinity landscapes using spectrally encoded beads
Source: eLife journal article supplement (doi:10.7554/elife.40499), 2019-07-08
Supplement: supp [file elife-40499-supp-v1.zip › elife_poa_e40499_Figure_2_source_data_2.csv]

conc			code	AVG	SD	N	CV	SEM	RSEM	MED	AVG_NORM	SD_NORM	N_NORM	CV_NORM	SEM_NORM	RSEM_NORM	MED_NORM	sequence
1000	Cy5 10%	0	1	6474.24545	1201.117036	26	0.18552232	235.5584309	0.03638392	6362.225663	10102.78441	2687.588355	26	0.266024518	527.0794411	0.0521717	9927.982303	HPVIVITGPH
1000	Cy5 10%	1	2	-47.7021177	36.04057471	9	-0.755534061	12.0135249	-0.251844687	-44.99674699	-69.29982223	54.8123608	9	-0.790945186	18.27078693	-0.263648395	-65.36956256	SCRAMBLED
1000	Cy5 10%	2	3	4801.737614	1522.670872	23	0.317108304	317.4988248	0.066121652	4968.76817			23					HPVIVVTGPH
1000	Cy5 10%	3	4	407.6885692	296.9405259	18	0.728351365	69.98955315	0.171674063	328.3411915	638.6226483	482.8105452	18	0.756018513	113.7995368	0.178195273	514.3291647	HPVIVINGPH
1000	Cy5 10%	4	5	59.41058955	53.14678077	7	0.89456747	20.08759499	0.338114722	28.23265944	77.55890437	70.64120982	7	0.910807217	26.69986764	0.34425277	36.85696692	HPVIAVTGPH
1000	Cy5 10%	5	6	7880.149865	5065.346324	29	0.642798222	940.6111986	0.119364633	6527.200259	10182.38359	6738.841077	29	0.661813712	1251.371373	0.122895721	8434.161524	HAVIVITGPH
1000	Cy5 10%	6	7	9131.339173	5197.827411	32	0.569229476	918.8547525	0.100626506	7364.807519	12861.06538	7631.761935	32	0.593400446	1349.117654	0.10489937	10372.98793	HPAIVITGPH
1000	Cy5 10%	7	8	20475.97192	17389.62138	23	0.849269644	3625.986712	0.177084962	13539.75577	30806.38642	26992.25524	23	0.876190244	5628.274285	0.182698295	20370.75212	HPKIVITGPH
1000	Cy5 10%	8	9	10257.67792	13657.86308	42	1.331477083	2107.454026	0.205451374	6821.471811	20841.78908	28444.36401	42	1.364775543	4389.060654	0.210589438	13860.02542	HPSIVITGPH
1000	Cy5 10%	9	10	20.34779817	55.36419183	25	2.720893502	11.07283837	0.5441787	7.310999843	28.30593474	77.16871097	25	2.726237861	15.43374219	0.545247572	10.17037238	HPVIAVTGPS
1000	Cy5 10%	10	11	2453.027051	1140.338022	74	0.46486973	132.5616024	0.054040008	2277.337932	3701.738601	1819.55544	74	0.491540769	211.5190235	0.057140454	3436.61507	HPVIAVTGPs
1000	Cy5 10%	11	12	5387.295372	1017.734981	24	0.1889139	207.744283	0.038561888	5517.308679	7214.604676	1840.133776	24	0.255056771	375.6157341	0.052063245	7388.717018	HPVIVITGPH
1000	Cy5 10%	12	13	-29.46898133	26.75294536	37	-0.907834074	4.398157125	-0.149247002	-29.30852417	-44.2396632	41.13512878	37	-0.929824637	6.762573514	-0.152862229	-43.99878041	SCRAMBLED
1000	Cy5 10%	13	14	10199.1543	5880.882257	28	0.576604891	1111.382281	0.108968082	8630.879675	15181.52421	9186.536743	28	0.60511294	1736.092259	0.114355597	12847.13465	HPVIVVTGPH
1000	Cy5 10%	14	15	639.909247	358.6148973	34	0.560415245	61.5019475	0.096110422	530.0317224	881.1993588	513.3444454	34	0.582551996	88.03784608	0.099906843	729.8903964	HPVIVINGPH
1000	Cy5 10%	15	16	12.47232447	31.37959145	34	2.515937708	5.381555536	0.431479757	5.658507371	17.05329122	42.95202852	34	2.518694366	7.36621212	0.43195252	7.736823579	HPVIAVTGPH
1000	Cy5 10%	16	17	7720.720698	4112.75812	24	0.53269096	839.5132358	0.108735087	6848.731789	9967.492369	5559.229584	24	0.557736026	1134.772987	0.11384739	8841.749951	HAVIVITGPH
1000	Cy5 10%	17	18	7142.156024	2355.415353	29	0.329790521	437.3896505	0.061240562	6551.805959	12229.36504	4924.709173	29	0.40269541	914.4955353	0.07477866	11218.52091	HPAIVITGPH
1000	Cy5 10%	18	19	15941.68579	8383.966241	16	0.525914659	2095.99156	0.131478665	13748.64871	21791.33427	12092.36039	16	0.554916016	3023.090097	0.138729004	18793.5833	HPKIVITGPH
1000	Cy5 10%	19	20	6673.572809	3152.91449	14	0.472447755	842.6518423	0.126266974	6645.66494	8995.229212	4593.038295	14	0.510608255	1227.541119	0.136465796	8957.612529	HPSIVITGPH
1000	Cy5 10%	20	21	19.17915192	30.82823696	34	1.607382698	5.286999021	0.275663859	14.29919915	29.45272637	47.63185856	34	1.617230879	8.168796351	0.277352808	21.95876031	HPVIAVTGPS
1000	Cy5 10%	21	22	3961.662549	1915.031845	47	0.483390955	279.3361038	0.070509818	3613.731031	5587.65584	2884.796866	47	0.516280342	420.7908703	0.075307228	5096.922075	HPVIAVTGPs
1000	Cy5 10%	22	23	5520.127824	1139.524846	53	0.20643088	156.5257754	0.028355462	5421.049429	7657.877213	1932.012556	53	0.252290877	265.3823342	0.034654817	7520.429275	HPVIVITGPH
1000	Cy5 10%	23	24	-24.55784585	30.98485864	27	-1.261709143	5.963038826	-0.242816038	-31.01366312	-33.42740748	42.49634127	27	-1.271302338	8.178424691	-0.244662249	-42.21487344	SCRAMBLED
1000	Cy5 10%	24	25	6789.703697	1781.400097	48	0.26236787	257.1229563	0.03786954	6520.789869	8472.583136	2655.608732	48	0.313435547	383.3041041	0.045240524	8137.016981	HPVIVVTGPH
1000	Cy5 10%	25	26	571.0745048	314.3160546	50	0.550394129	44.45100272	0.077837484	490.7444038	815.4429468	476.5611267	50	0.584419951	67.39592087	0.082649462	700.7387993	HPVIVINGPH
1000	Cy5 10%	26	27	77.32572732	185.2378357	33	2.395552452	32.24576822	0.417012156	30.26945435	166.5345685	402.299905	33	2.415714099	70.03142446	0.420521848	65.19059947	HPVIAVTGPH
1000	Cy5 10%	27	28	6853.306624	3701.308098	33	0.540076244	644.3150376	0.094015207	5740.575605	8457.94453	4722.110213	33	0.558304703	822.013877	0.097188374	7084.677909	HAVIVITGPH
1000	Cy5 10%	28	29	4164.588951	2994.452014	41	0.719027027	467.6548358	0.112293156	3184.548716	7136.154385	5338.50661	41	0.748092925	833.7346602	0.116832486	5456.824564	HPVIAVTGPs
1000	Cy5 10%	29	30	9229.078725	3737.929615	37	0.405016549	614.5118433	0.06658431	8053.90913	15935.66086	7248.619606	37	0.454867838	1191.665723	0.074779812	13906.51964	HPKIVITGPH
1000	Cy5 10%	30	31	10335.54612	4389.518088	43	0.424701127	669.3952328	0.064766315	8897.824623	17286.07022	8303.87629	43	0.480379646	1266.329262	0.073257209	14881.4992	HPSIVITGPH
1000	Cy5 10%	31	32	112.7953048	114.0923634	21	1.011499225	24.89699483	0.220727227	76.39703956	200.6177851	207.391926	21	1.033766402	45.25662853	0.225586323	135.8798125	HPVIAVTGPS
1000	Cy5 10%	32	33	10349.90839	6668.577075	26	0.644312667	1307.815563	0.12636011	7567.866281	15646.87671	10623.91469	26	0.678979894	2083.521089	0.133158913	11441.01631	HPAIVITGPH
1000	Cy5 10%	33	34	400.5303782	177.9540796	19	0.444296087	40.82546576	0.101928513	395.5645246	653.2195656	326.6927218	19	0.50012697	74.94845052	0.114736996	645.1208222	PALESPRIEITSCLGL
1000	Cy5 10%	34	35	8277.059167	7518.186881	29	0.908316194	1396.092255	0.168670083	4553.246628	12583.90942	11727.9757	29	0.931981891	2177.830413	0.173064692	6922.46388	SPRIEITPSHEL
1000	Cy5 10%	35	36	916.8794312	442.473139	26	0.482585958	86.77612192	0.094642893	794.8344352	1143.636141	579.9104038	26	0.507075969	113.7297871	0.099445779	991.4077631	ASGLSPRIEITGSHEL
1000	Cy5 10%	36	37	-19.61780885	37.13014976	67	-1.892675683	4.536169765	-0.231227137	-8.920811246	-47.51787151	91.30421868	67	-1.921471139	11.15458566	-0.234745061	-21.60781389	ATDTTPSVVVHVCESD
1000	Cy5 10%	37	38	886.0463434	491.465356	30	0.554672292	89.72888724	0.101268842	719.5345172	1295.694032	768.7030466	30	0.593275131	140.3453329	0.108316724	1052.198439	PIAIIITDTEIS
1000	Cy5 10%	38	39	273.3156619	81.4869705	28	0.298142338	15.39958993	0.056343606	276.822629	387.7518917	152.6995198	28	0.393807285	28.85749677	0.074422582	392.7272126	PALESPRIEITSCLGL
1000	Cy5 10%	39	40	4390.746763	4056.772262	16	0.923936743	1014.193066	0.230984186	2974.825577	7440.015916	7285.40381	16	0.979218847	1821.350952	0.244804712	5040.771157	SPRIEITPSHEL
1000	Cy5 10%	40	41	4864.159344	3629.203209	25	0.746111086	725.8406419	0.149222217	4266.118861	9391.036685	7740.798641	25	0.8242752	1548.159728	0.16485504	8236.423992	ASGLSPRIEITGSHEL
1000	Cy5 10%	41	42	-8.102014986	43.27930004	25	-5.341794617	8.655860007	-1.068358923	-15.0154452	-13.0734716	69.94131313	25	-5.34986538	13.98826263	-1.069973076	-24.22903399	ATDTTPSVVVHVCESD
1000	Cy5 10%	42	43	637.9237523	203.8128796	39	0.319494107	32.63618014	0.051160002	643.144277	913.8200264	343.7183045	39	0.376133478	55.03897753	0.060229559	921.2983811	PIAIIITDTEIS
1000	Cy5 10%	43	44	164.4879759	69.8269626	10	0.424511045	22.08122439	0.134242179	145.6443924	236.5684747	107.838203	10	0.455843506	34.10143402	0.144150374	209.4674188	PALESPRIEITSCLGL
1000	Cy5 10%	44	45	8617.053974	8454.398518	34	0.981124006	1449.917384	0.168261379	6119.600269	12028.33195	12112.8321	34	1.007025092	2077.333567	0.172703379	8542.19826	SPRIEITPSHEL
1000	Cy5 10%	45	46	562.6348924	490.0265285	30	0.870949412	89.46619447	0.15901288	426.7241376	867.7920092	783.8298842	30	0.903246257	143.1071029	0.16490945	658.1671379	ASGLSPRIEITGSHEL
1000	Cy5 10%	46	47	-10.67943801	33.78834743	27	-3.163869427	6.502570494	-0.608886955	-13.71696169	-14.66826849	46.58436811	27	-3.175860063	8.965165822	-0.611194554	-18.84032444	ATDTTPSVVVHVCESD
1000	Cy5 10%	47	48	973.136094	248.5103808	13	0.255370633	68.92437849	0.07082707	1058.343797	1567.787971	588.5508639	13	0.375402079	163.2346399	0.104117803	1705.063336	PIAIIITDTEIS
125	Cy5 10%	0	1	1776.868183	481.7017849	15	0.27109596	124.3748661	0.069996676	1683.863404	2772.727156	918.955288	15	0.331426511	237.2732351	0.085573957	2627.597159	HPVIVITGPH
125	Cy5 10%	1	2	-33.15235477	10.16750791	14	-0.306690369	2.717380791	-0.081966449	-32.92019897	-48.16248005	18.5798309	14	-0.385773965	4.965668682	-0.103102429	-47.82521293	SCRAMBLED
125	Cy5 10%	2	3	1097.364668	305.8569429	15	0.27871951	78.97192309	0.071965068	1170.025481			15					HPVIVVTGPH
125	Cy5 10%	3	4	34.19177553	38.10591715	11	1.114476115	11.48936632	0.336027192	23.69292801	53.5596136	60.66971684	11	1.132751205	18.2926079	0.341537339	37.11372252	HPVIVINGPH
125	Cy5 10%	4	5	-19.43124142	17.28785757	12	-0.889693931	4.99057461	-0.256832515	-22.03301445	-25.36695573	22.98299554	12	-0.906021037	6.63461933	-0.261545745	-28.76349946	HPVIAVTGPH
125	Cy5 10%	5	6	1448.393489	827.6811049	21	0.571447684	180.6148245	0.124700108	1209.72889	1871.550458	1109.373734	21	0.592756519	242.0851957	0.129350077	1563.158544	HAVIVITGPH
125	Cy5 10%	6	7	1772.59276	749.7345006	35	0.422959248	126.7282606	0.071493162	1595.752619	2496.614236	1135.881062	35	0.454968591	191.9989424	0.076903728	2247.543145	HPAIVITGPH
125	Cy5 10%	7	8	6217.163034	7984.958746	20	1.284341218	1785.491055	0.287187427	3646.783297	9353.808827	12181.45623	20	1.302299037	2723.856419	0.291202917	5486.636527	HPKIVITGPH
125	Cy5 10%	8	9	2218.481123	3362.650849	33	1.51574463	585.3623776	0.263857272	1640.477907	4507.561653	6964.529701	33	1.54507697	1212.369005	0.268963377	3333.161246	HPSIVITGPH
125	Cy5 10%	9	10	-14.29087849	23.73179886	22	-1.660625614	5.059636518	-0.35404657	-21.05294469	-19.88012022	33.18723258	22	-1.669367801	7.075541759	-0.355910411	-29.28686796	HPVIAVTGPS
125	Cy5 10%	10	11	221.805305	136.7497762	62	0.616530683	17.36723895	0.078299475	194.6939296	334.7151265	213.1740034	62	0.636881893	27.07312551	0.080884081	293.8027261	HPVIAVTGPs
125	Cy5 10%	11	12	1367.577617	400.3332492	19	0.292731648	91.84274615	0.067157246	1345.6155	1831.444388	621.2277516	19	0.339200991	142.5194205	0.077818044	1802.032969	HPVIVITGPH
125	Cy5 10%	12	13	-34.07404808	9.394059029	35	-0.275695421	1.587885791	-0.046601032	-34.97877164	-51.15291887	17.45350151	35	-0.341202455	2.950180212	-0.057673741	-52.51111531	SCRAMBLED
125	Cy5 10%	13	14	1812.595375	893.2621533	22	0.492808359	190.444131	0.105067095	1344.496957	2698.062972	1418.854211	22	0.525878835	302.5007342	0.112117744	2001.294665	HPVIVVTGPH
125	Cy5 10%	14	15	28.20219439	32.03882327	23	1.136040083	6.68055646	0.236880732	31.33427388	38.83637521	44.5500565	23	1.147121899	9.289328927	0.239191451	43.14946562	HPVIVINGPH
125	Cy5 10%	15	16	-33.33690034	9.536965961	31	-0.286078366	1.712889652	-0.051381191	-30.2914622	-45.58122835	14.10218597	31	-0.309385826	2.53282737	-0.055567335	-41.41722961	HPVIAVTGPH
125	Cy5 10%	16	17	1863.103612	1143.407565	14	0.613711206	305.5885258	0.164021219	1411.911847	2405.276885	1528.725682	14	0.635571602	408.5691244	0.169863656	1822.785866	HAVIVITGPH
125	Cy5 10%	17	18	1353.132763	329.202921	28	0.243289446	62.21350427	0.045977384	1379.297428	2316.941054	777.4418316	28	0.33554666	146.9226961	0.063412358	2361.742265	HPAIVITGPH
125	Cy5 10%	18	19	3686.846966	1660.468734	20	0.450376365	371.2920964	0.100707217	3177.485562	5039.700047	2438.84216	20	0.483926055	545.3416856	0.108209155	4343.433368	HPKIVITGPH
125	Cy5 10%	19	20	1457.318429	821.0306382	17	0.563384516	199.129179	0.136640816	1667.646716	1964.302134	1170.229633	17	0.595748288	283.8223755	0.144490183	2247.801123	HPSIVITGPH
125	Cy5 10%	20	21	-27.10146972	14.55837262	20	-0.537180189	3.255351083	-0.120117142	-27.56382299	-41.61874181	23.5548524	20	-0.565967431	5.267025117	-0.126554165	-42.32876092	HPVIAVTGPS
125	Cy5 10%	21	22	626.2959501	337.7903696	39	0.539346246	54.08974825	0.086364519	509.5734217	883.3478823	502.6342196	39	0.569010499	80.48588962	0.091114601	718.718687	HPVIAVTGPs
125	Cy5 10%	22	23	1407.609569	365.003941	28	0.259307658	68.97926109	0.049004541	1421.062045	1952.726746	580.1847901	28	0.297115196	109.6446192	0.056149494	1971.388888	HPVIVITGPH
125	Cy5 10%	23	24	-37.30562327	10.10626991	21	-0.270904733	2.205368898	-0.059116259	-36.08302296	-50.77930198	15.87119629	21	-0.312552471	3.463378969	-0.068204541	-49.11513489	SCRAMBLED
125	Cy5 10%	24	25	1430.571522	552.876875	37	0.386472725	90.89239836	0.063535725	1356.462973	1785.149499	754.7744459	37	0.422807415	124.0841545	0.069509111	1692.672585	HPVIVVTGPH
125	Cy5 10%	25	26	26.36581565	29.07022194	34	1.102572449	4.985501932	0.189089615	17.31023087	37.64800956	42.16373677	34	1.119945975	7.2310212	0.19206915	24.71745026	HPVIVINGPH
125	Cy5 10%	26	27	-24.2224352	11.01000356	29	-0.454537435	2.044506334	-0.084405483	-23.90971455	-52.16727904	28.74447084	29	-0.551005752	5.337714233	-0.1023192	-51.49378005	HPVIAVTGPH
125	Cy5 10%	27	28	1339.1343	527.4127397	21	0.393846039	115.0908953	0.085944252	1281.311763	1652.680122	691.6352684	21	0.418493125	150.9271891	0.091322687	1581.318977	HAVIVITGPH
125	Cy5 10%	28	29	368.566255	185.3736407	35	0.502958798	31.33386423	0.085015554	351.844352	631.5498907	343.3742689	35	0.543700939	58.04084486	0.091902232	602.896383	HPVIAVTGPs
125	Cy5 10%	29	30	2778.688099	1088.158579	22	0.391608752	231.9961885	0.083491266	2523.219174	4797.903725	2125.334665	22	0.442971511	453.1228731	0.094441844	4356.790773	HPKIVITGPH
125	Cy5 10%	30	31	3053.90809	2618.599205	25	0.85745842	523.719841	0.171491684	2192.173301	5107.622673	4527.176438	25	0.886356868	905.4352875	0.177271374	3666.382132	HPSIVITGPH
125	Cy5 10%	31	32	-19.70891879	13.94706093	26	-0.70765226	2.735243685	-0.138782026	-24.87478044	-35.05429275	25.90969971	26	-0.73913058	5.08131017	-0.144955433	-44.24229684	HPVIAVTGPS
125	Cy5 10%	32	33	2451.883678	1969.940204	18	0.803439503	464.3193588	0.189372507	1757.271679	3706.730551	3082.141256	18	0.831498598	726.467661	0.195986099	2656.623834	HPAIVITGPH
125	Cy5 10%	33	34	57.60248038	65.11236662	9	1.130374355	21.70412221	0.376791452	50.70297756	93.94310458	108.3597838	9	1.153461814	36.11992794	0.384487271	82.69079894	PALESPRIEITSCLGL
125	Cy5 10%	34	35	1928.765671	1671.322987	14	0.866524645	446.6798573	0.231588453	1092.673899	2932.37151	2613.624712	14	0.891300677	698.5205863	0.238210126	1661.231253	SPRIEITPSHEL
125	Cy5 10%	35	36	155.4033678	95.41373064	16	0.613974665	23.85343266	0.153493666	131.1883729	193.8367267	122.7771253	16	0.633404863	30.69428131	0.158351216	163.6330354	ASGLSPRIEITGSHEL
125	Cy5 10%	36	37	-30.19287804	10.15879884	44	-0.336463415	1.531496549	-0.050723768	-30.73693329	-73.13259653	34.53823633	44	-0.472268701	5.206835038	-0.071197185	-74.45039647	ATDTTPSVVVHVCESD
125	Cy5 10%	37	38	41.91437024	35.27576255	27	0.841614996	6.788823668	0.161968882	37.47897976	61.2927301	53.17404272	27	0.867542409	10.23334929	0.166958614	54.80671611	PIAIIITDTEIS
125	Cy5 10%	38	39	11.45471663	11.6263208	25	1.014981093	2.325264161	0.202996219	13.67178619	16.25076299	17.01589094	25	1.047082586	3.403178188	0.209416517	19.39611115	PALESPRIEITSCLGL
125	Cy5 10%	39	40	1116.482413	1598.700563	19	1.431908416	366.7670628	0.32850232	528.6263048	1891.852883	2777.593222	19	1.46818669	637.2235875	0.336825127	895.7446953	SPRIEITPSHEL
125	Cy5 10%	40	41	403.7687781	337.2067453	29	0.835148143	62.6177206	0.155083117	260.7616898	779.5401298	705.9984167	29	0.905660132	131.1006147	0.168176864	503.4420999	ASGLSPRIEITGSHEL
125	Cy5 10%	41	42	-28.28527877	10.74964939	20	-0.380043961	2.403694677	-0.084980413	-31.08581668	-45.64133607	21.92320519	20	-0.480336622	4.902177709	-0.107406534	-50.16030485	ATDTTPSVVVHVCESD
125	Cy5 10%	42	43	60.20069833	28.29465098	19	0.470005361	6.491238118	0.107826625	62.19910811	86.23695786	43.99817266	19	0.51020089	10.09387307	0.117048112	89.09966186	PIAIIITDTEIS
125	Cy5 10%	43	44	4.300460718	13.93296876	22	3.23987816	2.97051892	0.690744345	2.889151128	6.184971435	20.0648654	22	3.244132267	4.277843678	0.691651323	4.155209957	PALESPRIEITSCLGL
125	Cy5 10%	44	45	2087.160914	2432.198449	25	1.165314295	486.4396897	0.233062859	1109.03691	2913.416163	3458.818449	25	1.1872037	691.7636897	0.23744074	1548.07712	SPRIEITPSHEL
125	Cy5 10%	45	46	76.56929494	78.05183935	15	1.019362127	20.15289826	0.263198169	62.37795695	118.0982964	123.6596919	15	1.047091242	31.92879515	0.270357796	96.20998151	ASGLSPRIEITGSHEL
125	Cy5 10%	46	47	-34.35264938	10.00417075	20	-0.291219773	2.237000586	-0.065118721	-35.19605881	-47.18355816	18.92209786	20	-0.401031601	4.231109708	-0.089673392	-48.34198578	ATDTTPSVVVHVCESD
125	Cy5 10%	47	48	54.44015583	27.64573777	6	0.507818858	11.28632518	0.207316181	59.1332614	87.70676784	50.65721156	6	0.577574716	20.68072002	0.235793891	95.26767786	PIAIIITDTEIS
2000	Cy5 10%	0	1	8488.325815	1647.37172	39	0.194074987	263.7905922	0.031076869	8594.565274	13245.67108	3603.592199	39	0.272058107	577.0365659	0.043564162	13411.45323	HPVIVITGPH
2000	Cy5 10%	1	2	-56.2463587	43.12350292	14	-0.766689683	11.52524095	-0.204906437	-54.05878379	-81.71257056	65.50146323	14	-0.801608159	17.50600241	-0.214238792	-78.53454495	SCRAMBLED
2000	Cy5 10%	2	3	6709.174767	4938.638763	23	0.736102268	1029.777368	0.153487933	5890.878033			23					HPVIVVTGPH
2000	Cy5 10%	3	4	957.198602	442.0660245	7	0.461833128	167.085252	0.174556515	925.5355646	1499.401142	756.206908	7	0.504339291	285.8193455	0.190622334	1449.802663	HPVIVINGPH
2000	Cy5 10%	4	5	-17.62569216	47.47607468	8	-2.693572215	16.78532717	-0.952321589	0.163111781	-23.00986042	62.10382259	8	-2.699009097	21.95701705	-0.954243817	0.212937981	HPVIAVTGPH
2000	Cy5 10%	5	6	8122.078006	4195.977981	38	0.516613849	680.6775111	0.083805833	7556.894903	10494.99251	5668.245318	38	0.540090459	919.5108109	0.087614242	9764.687723	HAVIVITGPH
2000	Cy5 10%	6	7	12694.56415	8831.005241	41	0.695652496	1379.17131	0.108642667	9302.942701	17879.70159	12794.10141	41	0.715565713	1998.102947	0.111752589	13102.76094	HPAIVITGPH
2000	Cy5 10%	7	8	17517.74254	16655.71101	29	0.950790947	3092.887889	0.176557446	11076.01027	26355.68891	25694.48323	29	0.974912222	4771.345753	0.181036655	16664.01253	HPKIVITGPH
2000	Cy5 10%	8	9	8694.669118	6236.853806	47	0.717319282	909.7386273	0.104631771	8006.064699	17666.03136	13733.31431	47	0.777385369	2003.209775	0.11339331	16266.90885	HPSIVITGPH
2000	Cy5 10%	9	10	66.78859218	62.75638526	21	0.939627311	13.69456599	0.205043489	68.79977343	92.90998051	88.72834593	21	0.954992622	19.36211245	0.208396475	95.70774588	HPVIAVTGPS
2000	Cy5 10%	10	11	3463.085728	1466.693085	72	0.423522026	172.8514378	0.049912549	3173.233446	5225.966879	2365.460865	72	0.452636023	278.7722364	0.053343667	4788.565514	HPVIAVTGPs
2000	Cy5 10%	11	12	7387.66582	1302.820187	14	0.17635072	348.1933411	0.047131712	7285.435022	9893.478024	2432.77127	14	0.245896465	650.185471	0.065718595	9756.571702	HPVIVITGPH
2000	Cy5 10%	12	13	-34.11085542	50.44943278	43	-1.478984686	7.693466373	-0.22554305	-21.77242951	-51.20817509	76.43250029	43	-1.492583951	11.65584702	-0.227616919	-32.68538326	SCRAMBLED
2000	Cy5 10%	13	14	13044.58612	6517.78325	27	0.499654277	1254.347971	0.09615851	9952.350811	19416.97263	10335.6468	27	0.532299602	1989.096154	0.102441106	14814.1552	HPVIVVTGPH
2000	Cy5 10%	14	15	1109.796773	833.1603724	41	0.75073238	130.1177896	0.1172447	736.2678637	1528.267031	1172.790056	41	0.76739865	183.1590349	0.119847534	1013.891849	HPVIVINGPH
2000	Cy5 10%	15	16	31.9998915	103.769935	43	3.242821464	15.82476673	0.494525637	14.61058666	43.75314882	141.9772475	43	3.244960678	21.65132726	0.494851864	19.97691687	HPVIAVTGPH
2000	Cy5 10%	16	17	9167.007276	3903.003338	25	0.425766362	780.6006676	0.085153272	7704.54581	11834.6562	5405.041942	25	0.456713051	1081.008388	0.09134261	9946.610501	HAVIVITGPH
2000	Cy5 10%	17	18	8642.461892	2978.106119	35	0.34459002	503.3918115	0.058246344	8149.470777	14798.30753	6139.854858	35	0.414902505	1037.824891	0.070131323	13954.16911	HPAIVITGPH
2000	Cy5 10%	18	19	14653.38875	10160.72686	24	0.693404579	2074.049686	0.141540617	10260.27295	20030.309	14334.69826	24	0.715650381	2926.058029	0.146081522	14025.18156	HPKIVITGPH
2000	Cy5 10%	19	20	9634.528863	8617.477437	24	0.894436828	1759.035216	0.182576153	8327.276339	12986.26657	11884.60625	24	0.915167279	2425.935091	0.186807739	11224.23648	HPSIVITGPH
2000	Cy5 10%	20	21	43.91661023	59.42009166	33	1.353020904	10.34371027	0.235530707	34.07636956	67.4411418	92.03732291	33	1.364705882	16.02164143	0.237564801	52.32984194	HPVIAVTGPS
2000	Cy5 10%	21	22	5507.329394	2848.735159	36	0.517262534	474.7891931	0.086210422	4798.761701	7767.713901	4257.66464	36	0.548123257	709.6107733	0.091353876	6768.327315	HPVIAVTGPs
2000	Cy5 10%	22	23	6967.394334	1233.456102	52	0.177032624	171.0495854	0.024550008	6854.556334	9665.618624	2212.086752	52	0.228861373	306.7612388	0.031737362	9509.082475	HPVIVITGPH
2000	Cy5 10%	23	24	-43.02515805	54.97448194	24	-1.277728762	11.22161914	-0.260815291	-36.68812483	-58.56456216	75.38445507	24	-1.287202572	15.38778746	-0.262749125	-49.93878151	SCRAMBLED
2000	Cy5 10%	24	25	8359.92615	2221.603116	55	0.265744347	299.5609031	0.03583296	8404.155716	10431.99711	3299.299493	55	0.316267294	444.8774529	0.042645473	10487.1893	HPVIVVTGPH
2000	Cy5 10%	25	26	1028.244801	533.2562556	49	0.518608268	76.17946509	0.074086895	888.5689482	1468.240946	814.2683695	49	0.5545877	116.3240528	0.079226814	1268.79641	HPVIVINGPH
2000	Cy5 10%	26	27	134.6425179	148.0597911	30	1.099651086	27.03189581	0.200767902	99.7369982	289.9763687	331.4159151	30	1.142906633	60.50799088	0.208665248	214.8011863	HPVIAVTGPH
2000	Cy5 10%	27	28	9747.596281	7597.78434	30	0.779452095	1387.15929	0.142307832	7727.120846	12029.90515	9529.988516	30	0.792191493	1739.929894	0.144633717	9536.354213	HAVIVITGPH
2000	Cy5 10%	28	29	5125.828784	3060.218023	54	0.597019165	416.4429254	0.081244018	4813.767786	8783.269125	5548.600727	54	0.631723866	755.0689205	0.085966729	8248.542773	HPVIAVTGPs
2000	Cy5 10%	29	30	11319.57901	4701.366615	44	0.415330518	708.7576848	0.062613431	10086.71904	19545.28481	9070.481817	44	0.464075193	1367.426584	0.069961968	17416.5308	HPKIVITGPH
2000	Cy5 10%	30	31	13858.54329	9275.813612	38	0.669320968	1504.735666	0.108578199	10984.18958	23178.23845	16362.98462	38	0.705963253	2654.426619	0.114522362	18370.91822	HPSIVITGPH
2000	Cy5 10%	31	32	108.3090945	150.6121786	26	1.390577396	29.53747836	0.272714664	56.17604724	192.6386093	271.0150558	26	1.406857415	53.15042531	0.275907439	99.91474551	HPVIAVTGPS
2000	Cy5 10%	32	33	17851.21436	14998.13378	24	0.840174426	3061.481237	0.171499887	10890.72469	26987.26788	23399.18996	24	0.867045529	4776.33965	0.176984928	16464.4768	HPAIVITGPH
2000	Cy5 10%	33	34	652.8826493	183.1090254	23	0.280462386	38.18087114	0.05848045	594.9624272	1064.777464	385.9537388	23	0.362473617	80.4769177	0.075580974	970.3161591	PALESPRIEITSCLGL
2000	Cy5 10%	34	35	12301.60866	13967.22676	35	1.135398398	2360.892224	0.191917357	6164.104234	18702.57611	21590.59487	35	1.154418234	3649.476624	0.195132296	9371.508376	SPRIEITPSHEL
2000	Cy5 10%	35	36	1340.213444	1016.574802	35	0.75851709	171.8325038	0.128212789	1177.68309	1671.666392	1294.419341	35	0.774328746	218.7968028	0.130885447	1468.940079	ASGLSPRIEITGSHEL
2000	Cy5 10%	36	37	-17.69202376	53.13414891	44	-3.003282701	8.010274341	-0.452761903	-17.76560339	-42.85327268	129.481694	44	-3.021512383	19.52009983	-0.455510131	-43.0314958	ATDTTPSVVVHVCESD
2000	Cy5 10%	37	38	1088.09394	512.8482848	21	0.471327214	111.9126707	0.10285203	1010.040709	1591.154723	821.3555044	21	0.516200903	179.2344653	0.112644272	1477.014976	PIAIIITDTEIS
2000	Cy5 10%	38	39	325.2014595	134.6545309	25	0.414064965	26.93090617	0.082812993	304.6540537	461.3620757	224.9087448	25	0.487488584	44.98174896	0.097497717	432.2115492	PALESPRIEITSCLGL
2000	Cy5 10%	39	40	8207.128852	10788.38178	19	1.314513513	2475.024522	0.301570082	2962.204671	13906.78456	18828.96574	19	1.353940996	4319.660993	0.310615367	5019.385333	SPRIEITPSHEL
2000	Cy5 10%	40	41	9147.008052	8350.588171	18	0.912931105	1968.252507	0.215179925	6319.951006	17659.76032	17268.60054	18	0.977850222	4070.248182	0.230481508	12201.67506	ASGLSPRIEITGSHEL
2000	Cy5 10%	41	42	0.642229897	51.8367392	16	80.71368122	12.9591848	20.1784203	-2.340531674	1.036306936	83.64470163	16	80.71421576	20.91117541	20.17855394	-3.776699307	ATDTTPSVVVHVCESD
2000	Cy5 10%	42	43	880.363837	448.2512486	42	0.509165904	69.16666928	0.078566005	856.6837772	1261.113263	689.1840631	42	0.546488633	106.3434097	0.084325027	1227.191791	PIAIIITDTEIS
2000	Cy5 10%	43	44	222.6386523	122.3864553	16	0.54970893	30.59661383	0.137427232	212.5775378	320.2014378	183.8758205	16	0.574250453	45.96895514	0.143562613	305.7314286	PALESPRIEITSCLGL
2000	Cy5 10%	44	45	12472.30419	13208.79513	31	1.05905011	2372.369638	0.190211015	9469.726872	17409.78013	18856.34597	31	1.083089265	3386.699713	0.194528575	13218.55691	SPRIEITPSHEL
2000	Cy5 10%	45	46	789.9127377	408.2177281	14	0.516788385	109.100777	0.138117506	695.9215627	1218.338875	693.8877456	14	0.569535915	185.4493006	0.152214876	1073.369568	ASGLSPRIEITGSHEL
2000	Cy5 10%	46	47	-46.90141182	45.47060446	17	-0.969493299	11.02824147	-0.235136663	-60.64824545	-64.41935433	64.93057561	17	-1.007935834	15.74797774	-0.244460347	-83.30070805	ATDTTPSVVVHVCESD
2000	Cy5 10%	47	48	1059.689007	452.5837923	16	0.427091146	113.1459481	0.106772786	1017.861284	1707.23056	867.366223	16	0.508054532	216.8415558	0.127013633	1639.843273	PIAIIITDTEIS
250	Cy5 10%	0	1	3306.538678	358.0330882	17	0.108280327	86.83577883	0.026261837	3322.476044	5159.712846	1131.320928	17	0.219260444	274.3856285	0.053178469	5184.582427	HPVIVITGPH
250	Cy5 10%	1	2	-24.16726493	14.93840252	13	-0.618125492	4.143167403	-0.171437166	-22.05043051	-35.10928327	23.20512995	13	-0.660940007	6.435945068	-0.183311776	-32.03402676	SCRAMBLED
250	Cy5 10%	2	3	2341.924413	797.8035523	15	0.340661529	205.9919914	0.087958429	2045.379248			15					HPVIVVTGPH
250	Cy5 10%	3	4	127.9325109	67.08488291	12	0.52437713	19.3657376	0.151374639	115.4518485	200.3995331	112.659416	12	0.562174045	32.52197209	0.162285668	180.8492335	HPVIVINGPH
250	Cy5 10%	4	5	7.037239729	26.87237323	10	3.818595681	8.497790555	1.207545981	6.480300772	9.186924543	35.11640085	10	3.822432707	11.10478099	1.208759356	8.459855924	HPVIAVTGPH
250	Cy5 10%	5	6	2245.685003	1496.575719	38	0.666422814	242.77664	0.108108056	1949.055296	2901.775539	1987.085382	38	0.684782594	322.3478146	0.111086406	2518.483658	HAVIVITGPH
250	Cy5 10%	6	7	3997.045162	2373.675571	32	0.593857581	419.6105231	0.104980181	3470.669137	5629.651704	3473.858775	32	0.6170646	614.0972741	0.109082641	4888.275622	HPAIVITGPH
250	Cy5 10%	7	8	9347.094583	10537.8347	21	1.127391469	2299.544055	0.246016988	5928.136731	14062.83466	16141.42639	21	1.14780745	3522.348012	0.25047212	8918.964707	HPKIVITGPH
250	Cy5 10%	8	9	2904.588914	1161.993678	53	0.400054436	159.612107	0.054951703	2948.87373	5901.611453	2949.770471	53	0.499824581	405.1821354	0.068656186	5991.590375	HPSIVITGPH
250	Cy5 10%	9	10	38.03670567	71.61314515	19	1.882737842	16.42918225	0.431929684	21.89328511	52.91307194	100.0296848	19	1.890453175	22.94838356	0.433699703	30.45587018	HPVIAVTGPS
250	Cy5 10%	10	11	612.7548519	312.5623668	89	0.510093663	33.13154461	0.05406982	536.3713455	924.6772423	494.2518858	89	0.534512869	52.39059512	0.056658251	809.4107701	HPVIAVTGPs
250	Cy5 10%	11	12	2580.577274	527.4452731	31	0.20439042	94.73196757	0.036709603	2511.773246	3455.879728	921.7611837	31	0.266722588	165.5531958	0.047904791	3363.738158	HPVIVITGPH
250	Cy5 10%	12	13	-25.33261539	13.64182406	42	-0.538508316	2.104979152	-0.083093637	-26.18930757	-38.03003438	21.85990581	42	-0.574806365	3.373056697	-0.088694548	-39.31612476	SCRAMBLED
250	Cy5 10%	13	14	3228.232717	1010.457033	21	0.313006255	220.499802	0.068303565	2796.44233	4805.250678	1743.593569	21	0.36285174	380.4833102	0.079180741	4162.527173	HPVIVVTGPH
250	Cy5 10%	14	15	112.471713	63.11039757	27	0.5611224	12.14560168	0.107988056	103.5736891	154.8813396	90.33180176	27	0.583232312	17.38436335	0.112243111	142.6281443	HPVIVINGPH
250	Cy5 10%	15	16	-8.00512154	24.68234782	42	-3.08331956	3.808568954	-0.475766537	-13.83482565	-10.94532693	33.77256538	42	-3.085569359	5.211219975	-0.476113689	-18.91622618	HPVIAVTGPH
250	Cy5 10%	16	17	3530.11749	3015.010397	18	0.854082167	710.6447657	0.201309097	2620.194269	4557.40086	3964.588192	18	0.86992308	934.4623983	0.205042836	3382.685038	HAVIVITGPH
250	Cy5 10%	17	18	2487.620109	773.0725813	49	0.310767942	110.4389402	0.04439542	2461.929917	4259.500113	1649.579176	49	0.387270603	235.654168	0.055324372	4215.511331	HPAIVITGPH
250	Cy5 10%	18	19	7749.136596	7718.00284	25	0.995982294	1543.600568	0.199196459	4224.82438	10592.60784	10715.43877	25	1.01159591	2143.087753	0.202319182	5775.083105	HPKIVITGPH
250	Cy5 10%	19	20	3186.053004	1741.305235	19	0.546539946	399.4828185	0.125384863	3756.937305	4294.442854	2490.109726	19	0.579844653	571.2703502	0.133025487	5063.930995	HPSIVITGPH
250	Cy5 10%	20	21	88.94700838	564.7140533	30	6.348881919	103.1022085	1.159141947	-16.37192775	136.5926872	867.5523877	30	6.351382385	158.3926708	1.159598468	-25.14177427	HPVIAVTGPS
250	Cy5 10%	21	22	1100.625566	503.6968518	46	0.457645967	74.26604913	0.067476217	985.9347291	1552.357576	764.1611737	46	0.492258476	112.6694183	0.072579553	1390.593944	HPVIAVTGPs
250	Cy5 10%	22	23	2530.764385	543.2492564	56	0.214658172	72.59473546	0.028684905	2467.913811	3510.839519	909.5385856	56	0.259065839	121.542206	0.034619129	3423.649151	HPVIVITGPH
250	Cy5 10%	23	24	-22.15048867	13.1840219	28	-0.595202305	2.491545945	-0.112482663	-20.43434533	-30.15058466	18.55095317	28	-0.615276731	3.50580062	-0.116276373	-27.81462152	SCRAMBLED
250	Cy5 10%	24	25	2512.136184	688.075428	51	0.273900528	96.34983181	0.038353745	2659.136367	3134.788146	1013.009312	51	0.323150805	141.8496764	0.045250164	3318.223437	HPVIVVTGPH
250	Cy5 10%	25	26	179.1858388	502.50447	45	2.804376023	74.90894359	0.418051695	87.07526264	255.8612356	719.2904127	45	2.811252009	107.2254839	0.419076706	124.3356308	HPVIVINGPH
250	Cy5 10%	26	27	1.830606847	30.31757078	26	16.56148661	5.945764809	3.247974746	-8.22739153	3.942534159	65.30577166	26	16.56441492	12.80751554	3.248549036	-17.71913625	HPVIAVTGPH
250	Cy5 10%	27	28	2385.240324	1314.645744	38	0.551158611	213.2637008	0.089409733	1883.341028	2943.722127	1675.072582	38	0.569032167	271.7326547	0.092309207	2324.307787	HAVIVITGPH
250	Cy5 10%	28	29	909.0666967	335.6760036	36	0.369253438	55.9460006	0.06154224	830.2437465	1557.714428	659.0278316	36	0.423073588	109.8379719	0.070512265	1422.648819	HPVIAVTGPs
250	Cy5 10%	29	30	4786.998416	1848.993501	42	0.386253209	285.3058912	0.059600164	4360.622609	8265.61194	3622.355625	42	0.438244095	558.9416077	0.067622532	7529.397584	HPKIVITGPH
250	Cy5 10%	30	31	3861.13439	1219.771625	24	0.315910171	248.9848403	0.064484894	3458.774857	6457.698455	2502.662625	24	0.387547149	510.8538691	0.079107731	5784.757223	HPSIVITGPH
250	Cy5 10%	31	32	2.774857683	32.65739283	33	11.76903343	5.684922394	2.048725752	-4.207215611	4.935363253	58.09400344	33	11.77096811	10.11286794	2.049062536	-7.482955776	HPVIAVTGPS
250	Cy5 10%	32	33	4407.430783	3191.320011	39	0.72407717	511.0201815	0.115945141	3425.047034	6663.104976	5031.251545	39	0.755091142	805.6450212	0.120911351	5177.948119	HPAIVITGPH
250	Cy5 10%	33	34	102.8844636	55.27235829	26	0.537227453	10.83980129	0.105358972	92.29598466	167.7928774	98.0320188	26	0.58424422	19.22566065	0.114579718	150.5242705	PALESPRIEITSCLGL
250	Cy5 10%	34	35	2668.123696	1908.941742	33	0.715462235	332.3041039	0.124545989	1960.504525	4056.443989	3023.175331	33	0.745277228	526.2672751	0.129736113	2980.625226	SPRIEITPSHEL
250	Cy5 10%	35	36	297.3106713	330.4029478	37	1.111305377	54.31791002	0.182697479	208.0616846	370.8396297	416.1403094	37	1.122157062	68.41304545	0.184481485	259.518159	ASGLSPRIEITGSHEL
250	Cy5 10%	36	37	-13.88960866	17.3281951	51	-1.247565393	2.426432649	-0.174694097	-15.65810718	-33.64313746	43.4276678	51	-1.290832873	6.081089832	-0.180752756	-37.92675985	ATDTTPSVVVHVCESD
250	Cy5 10%	37	38	198.2897712	83.50707368	38	0.421136568	13.54663617	0.068317373	192.1688587	289.9655024	136.5211163	38	0.470818477	22.1466495	0.076376842	281.0146954	PIAIIITDTEIS
250	Cy5 10%	38	39	63.304437	23.18196887	23	0.366198168	4.833774655	0.076357596	61.87937373	89.80976438	40.19390052	23	0.447544883	8.381007615	0.093319559	87.78803254	PALESPRIEITSCLGL
250	Cy5 10%	39	40	1780.413202	1980.062665	20	1.112136589	442.7554719	0.248681301	1042.565343	3016.867807	3494.958008	20	1.158472373	781.4963683	0.259042298	1766.602167	SPRIEITPSHEL
250	Cy5 10%	40	41	944.9318047	760.7693083	35	0.805104987	128.5934836	0.136087581	581.3207321	1824.341806	1601.832251	35	0.878032968	270.7590684	0.14841466	1122.332542	ASGLSPRIEITGSHEL
250	Cy5 10%	41	42	-12.68109299	15.35066169	25	-1.210515663	3.070132338	-0.242103133	-14.61628177	-20.46230591	25.48882294	25	-1.245647634	5.097764588	-0.249129527	-23.58494091	ATDTTPSVVVHVCESD
250	Cy5 10%	42	43	127.391474	174.1990028	33	1.367430624	30.32415408	0.238039118	148.5481992	182.4871385	252.1538064	33	1.381762071	43.89434356	0.240533902	212.7939567	PIAIIITDTEIS
250	Cy5 10%	43	44	76.38945471	27.5141867	15	0.360183049	7.104132459	0.092998863	85.5365413	109.8641811	43.57545045	15	0.396630185	11.25113293	0.102409473	123.0196249	PALESPRIEITSCLGL
250	Cy5 10%	44	45	2952.934662	2551.265756	41	0.863976365	398.4407707	0.134930439	2326.176694	4121.928267	3682.038903	41	0.893280684	575.0378668	0.139507005	3247.052362	SPRIEITPSHEL
250	Cy5 10%	45	46	190.5224962	148.0192191	28	0.776912029	27.97300307	0.146822573	150.3669753	293.8564636	238.89161	28	0.812953396	45.14627074	0.153633751	231.9217335	ASGLSPRIEITGSHEL
250	Cy5 10%	46	47	-21.55289957	14.081156	24	-0.653330006	2.874303933	-0.133360429	-23.82118139	-29.60302942	20.99223195	24	-0.70912445	4.285021404	-0.144749422	-32.71852733	ATDTTPSVVVHVCESD
250	Cy5 10%	47	48	204.690724	64.17352666	26	0.313514581	12.58546403	0.061485268	185.2563139	329.7705808	137.5597782	26	0.417137811	26.97769205	0.081807455	298.4604335	PIAIIITDTEIS
500	Cy5 10%	0	1	5129.987205	714.2595102	26	0.139232221	140.0778146	0.027305685	5327.642217	8005.126646	1889.890275	26	0.236084994	370.6379766	0.046300077	8313.558879	HPVIVITGPH
500	Cy5 10%	1	2	-27.12662231	24.36919595	22	-0.898349808	5.195530034	-0.191528823	-20.78888158	-39.40852513	36.5840813	22	-0.928329116	7.799752341	-0.197920433	-30.20129645	SCRAMBLED
500	Cy5 10%	2	3	3546.283232	1328.007122	12	0.374478584	383.3626346	0.108102656	3351.173711			12					HPVIVVTGPH
500	Cy5 10%	3	4	257.8818889	97.98444321	11	0.379958607	29.54342122	0.11456183	256.7639149	403.9583821	173.9540783	11	0.430623762	52.44912805	0.12983795	402.2071347	HPVIVINGPH
500	Cy5 10%	4	5	6.907911113	42.72403862	11	6.184798547	12.88178233	1.864786926	-0.816728761	9.018089562	55.7964381	11	6.187168326	16.82325907	1.865501441	-1.066217123	HPVIAVTGPH
500	Cy5 10%	5	6	4122.473747	1704.808724	40	0.413540226	269.5539271	0.065386451	3773.720988	5326.879533	2357.247135	40	0.442519325	372.7134976	0.069968449	4876.236533	HAVIVITGPH
500	Cy5 10%	6	7	6409.430436	4516.027506	54	0.704591079	614.553503	0.095882701	5656.592983	9027.383859	6538.160161	54	0.724258574	889.7309028	0.098559108	7967.047416	HPAIVITGPH
500	Cy5 10%	7	8	15751.2973	15925.99919	14	1.01109127	4256.402322	0.270225508	11460.42931	23698.04731	24499.19641	14	1.033806545	6547.685658	0.276296421	17242.37635	HPKIVITGPH
500	Cy5 10%	8	9	4849.647828	1567.522685	34	0.323224024	268.8279227	0.055432463	4868.732192	9853.62749	4342.922233	34	0.440743497	744.8050184	0.075586886	9892.403544	HPSIVITGPH
500	Cy5 10%	9	10	76.77780426	126.5615248	28	1.648412924	23.91788001	0.311520761	45.00154941	106.8060288	177.0010375	28	1.657219537	33.45005193	0.313185054	62.60190463	HPVIAVTGPS
500	Cy5 10%	10	11	1512.486093	745.5437052	61	0.49292599	95.45708987	0.063112706	1380.198578	2282.415985	1182.645014	61	0.518154894	151.4221776	0.066342936	2082.787612	HPVIAVTGPs
500	Cy5 10%	11	12	4205.698385	943.0441906	33	0.224230105	164.1629222	0.039033451	4283.428858	5632.223433	1589.491238	33	0.282213811	276.6949088	0.049127119	5736.319199	HPVIVITGPH
500	Cy5 10%	12	13	-16.06818346	20.58448093	53	-1.281070818	2.827495909	-0.17596861	-16.6480959	-24.12200872	31.28014997	53	-1.296747312	4.29665904	-0.178121942	-24.99258958	SCRAMBLED
500	Cy5 10%	13	14	6857.074298	3893.892136	18	0.567864947	917.7991781	0.133847052	5520.847654	10206.81091	6091.329216	18	0.59679064	1435.740065	0.140664903	8217.826675	HPVIVVTGPH
500	Cy5 10%	14	15	359.9066215	230.3145529	43	0.639928635	35.12264005	0.097588202	307.315936	495.6163481	326.8101261	43	0.659401425	49.838077	0.100557775	423.1953312	HPVIVINGPH
500	Cy5 10%	15	16	-2.98396865	26.24277321	36	-8.794587438	4.373795534	-1.465764573	-9.245566264	-4.079952096	35.8847146	36	-8.795376454	5.980785767	-1.465896076	-12.64137526	HPVIAVTGPH
500	Cy5 10%	16	17	5141.794735	1649.092094	20	0.320723051	368.7482023	0.071715854	4687.693437	6638.084939	2394.988401	20	0.360795082	535.535687	0.080676233	6051.837697	HAVIVITGPH
500	Cy5 10%	17	18	4606.556896	1807.770225	36	0.392434147	301.2950375	0.065405691	4556.991482	7887.71145	3592.212796	36	0.45541889	598.7021326	0.075903148	7802.841623	HPAIVITGPH
500	Cy5 10%	18	19	7732.008737	4192.89555	11	0.542277653	1264.205575	0.163502864	6369.567288	10569.19507	6029.173305	11	0.570447727	1817.86415	0.171996461	8706.818822	HPKIVITGPH
500	Cy5 10%	19	20	6137.032205	5378.002006	20	0.876319665	1202.557807	0.195951034	4467.322857	8272.032531	7423.890268	20	0.897468698	1660.03233	0.200680102	6021.45121	HPSIVITGPH
500	Cy5 10%	20	21	5.566662337	27.30608596	31	4.905288719	4.904317817	0.881015862	1.473883748	8.548520984	41.96062576	31	4.908524625	7.536350862	0.881597048	2.263389692	HPVIAVTGPS
500	Cy5 10%	21	22	2438.612268	1416.132736	35	0.580712545	239.3701214	0.098158336	1970.735873	3439.496906	2092.462926	35	0.608363078	353.6907889	0.102832129	2779.589042	HPVIAVTGPs
500	Cy5 10%	22	23	4124.741682	1010.939305	42	0.245091543	155.9913214	0.037818446	4252.280505	5722.107593	1629.614078	42	0.284792631	251.4549114	0.043944457	5899.037671	HPVIVITGPH
500	Cy5 10%	23	24	-23.67525125	26.62045235	38	-1.124399993	4.318407611	-0.182401765	-22.20124438	-32.22604603	36.58153092	38	-1.135154182	5.934307934	-0.184146325	-30.21967182	SCRAMBLED
500	Cy5 10%	24	25	4620.402708	1042.258554	73	0.225577427	121.9871369	0.026401841	4517.747086	5765.604481	1633.713495	73	0.283355111	191.2117017	0.033164207	5637.504886	HPVIVVTGPH
500	Cy5 10%	25	26	329.5404872	208.1443035	39	0.631619821	33.32976305	0.101140116	282.2879741	470.5541287	311.2624258	39	0.661480597	49.8418776	0.105921667	403.0817967	HPVIVINGPH
500	Cy5 10%	26	27	27.67390078	67.08976923	37	2.424297527	11.02949012	0.398552058	7.279656764	59.60061787	145.677146	37	2.444222076	23.94917527	0.401827634	15.67802257	HPVIAVTGPH
500	Cy5 10%	27	28	4629.118547	2239.964795	29	0.483885814	415.9510201	0.08985534	4124.749642	5712.983534	2880.200939	29	0.504150051	534.8398873	0.093618314	5090.521348	HAVIVITGPH
500	Cy5 10%	28	29	2225.051847	1366.352046	52	0.614076498	189.478937	0.085157088	2050.161698	3812.696447	2470.124489	52	0.647868123	342.5446347	0.089843144	3513.016666	HPVIAVTGPs
500	Cy5 10%	29	30	7205.75734	3315.66084	35	0.460140508	560.4489732	0.077777942	6447.271818	12442.03334	6277.935292	35	0.504574704	1061.164745	0.085288692	11132.37196	HPKIVITGPH
500	Cy5 10%	30	31	9647.813374	9458.635722	42	0.980391655	1459.499178	0.151277717	6441.783	16135.8459	16228.85396	42	1.005764065	2504.166532	0.155192764	10773.80063	HPSIVITGPH
500	Cy5 10%	31	32	32.48449105	40.3430016	24	1.241915766	8.234980717	0.253504994	23.74866081	57.77693191	72.80574476	24	1.260117877	14.86141042	0.257220484	42.2393799	HPVIAVTGPS
500	Cy5 10%	32	33	6190.025504	3991.922623	33	0.64489599	694.9045329	0.112261982	5421.196952	9358.011905	6359.082193	33	0.679533458	1106.974122	0.118291592	8195.705426	HPAIVITGPH
500	Cy5 10%	33	34	282.0924977	122.3184298	24	0.43361107	24.96814493	0.088510489	251.7325178	460.0608314	225.7331183	24	0.490659284	46.07757983	0.100155407	410.5471517	PALESPRIEITSCLGL
500	Cy5 10%	34	35	5099.968978	5591.487398	39	1.096376747	895.354554	0.175560784	3315.587534	7753.665443	8653.569697	39	1.116061785	1385.680139	0.178712913	5040.806445	SPRIEITPSHEL
500	Cy5 10%	35	36	790.074043	741.3681185	24	0.938352709	151.3311335	0.191540445	536.4991874	985.4700613	937.3590217	24	0.951179603	191.3376091	0.194158723	669.1827073	ASGLSPRIEITGSHEL
500	Cy5 10%	36	37	-15.57574777	95.75813167	55	-6.147899484	12.91202384	-0.828982597	-4.826442723	-37.72727051	232.2802147	55	-6.156825331	31.32065777	-0.830186158	-11.69051483	ATDTTPSVVVHVCESD
500	Cy5 10%	37	38	416.9919129	128.462755	17	0.308070135	31.15679458	0.074717983	416.9709214	609.78067	227.5235727	17	0.373123623	55.18257192	0.090495771	609.7499735	PIAIIITDTEIS
500	Cy5 10%	38	39	141.6327723	47.54759772	22	0.335710422	10.1371819	0.071573702	147.2002348	200.9338763	84.98738417	22	0.42296195	18.11937119	0.090175791	208.8324141	PALESPRIEITSCLGL
500	Cy5 10%	39	40	3957.163425	3270.404396	25	0.826451689	654.0808791	0.165290338	2546.120215	6705.319267	5953.148604	25	0.88782478	1190.629721	0.177564956	4314.340122	SPRIEITPSHEL
500	Cy5 10%	40	41	1850.573375	1783.994589	31	0.964022617	320.414887	0.173143573	1286.89212	3572.827538	3664.696178	31	1.025713147	658.198864	0.18422352	2484.550823	ASGLSPRIEITGSHEL
500	Cy5 10%	41	42	-3.050397947	23.29433707	19	-7.636491195	5.344087433	-1.751931232	-3.225738924	-4.922144801	37.61571447	19	-7.642138943	8.62963674	-1.753226914	-5.205076305	ATDTTPSVVVHVCESD
500	Cy5 10%	42	43	357.83176	137.5651597	40	0.384440888	21.75096157	0.060785442	336.9345794	512.5907716	221.7775408	40	0.432660034	35.06610814	0.068409558	482.6557487	PIAIIITDTEIS
500	Cy5 10%	43	44	106.8485118	44.55761804	15	0.41701674	11.50472751	0.107673259	119.0501805	153.6707429	68.97859017	15	0.448872628	17.8101954	0.115898414	171.2193214	PALESPRIEITSCLGL
500	Cy5 10%	44	45	6108.1358	6072.391582	34	0.994148097	1041.406565	0.170494992	4144.397859	8526.195292	8694.318408	34	1.019718422	1491.063306	0.174880267	5785.062198	SPRIEITPSHEL
500	Cy5 10%	45	46	323.8134006	327.6500319	21	1.011848278	71.4990987	0.220803397	168.9099994	499.4405525	519.3071961	21	1.039777794	113.3221207	0.226898117	260.5219651	ASGLSPRIEITGSHEL
500	Cy5 10%	46	47	-15.6814752	20.76501945	19	-1.324175129	4.763822176	-0.303786609	-18.03862109	-21.53859486	29.13254926	19	-1.352574272	6.683465168	-0.310301819	-24.77614806	ATDTTPSVVVHVCESD
500	Cy5 10%	47	48	450.6635309	189.246066	22	0.419927625	40.34739684	0.08952887	400.6082597	726.0493853	364.5113353	22	0.502047578	77.7140778	0.107036903	645.4069628	PIAIIITDTEIS
63	Cy5 10%	0	1	789.1356376	135.5028702	30	0.171710494	24.7393262	0.031349904	794.4278507	1231.412569	315.9599412	30	0.256583333	57.68612902	0.046845493	1239.670842	HPVIVITGPH
63	Cy5 10%	1	2	-40.56427679	6.722594256	21	-0.165726959	1.466990335	-0.036164587	-41.07469851	-58.93023844	16.89849583	21	-0.286754242	3.687554108	-0.062574906	-59.67175971	SCRAMBLED
63	Cy5 10%	2	3	468.4284325	214.9112561	10	0.458792083	67.96090642	0.145082795	430.2367476			10					HPVIVVTGPH
63	Cy5 10%	3	4	-18.39529281	8.448689807	15	-0.459285421	2.181442328	-0.118586986	-19.10081717	-28.81525629	14.46547047	15	-0.502007351	3.734968414	-0.129617741	-29.920423	HPVIVINGPH
63	Cy5 10%	4	5	-32.78579762	7.033889303	7	-0.214540741	2.658560263	-0.081088778	-33.23553784	-42.80096464	11.74857691	7	-0.274493274	4.440544679	-0.103748706	-43.38808824	HPVIAVTGPH
63	Cy5 10%	5	6	464.633531	308.9492663	37	0.66493106	50.7909465	0.109313993	391.5925655	600.3790438	410.2575656	37	0.683330922	67.44592833	0.112338912	505.9987159	HAVIVITGPH
63	Cy5 10%	6	7	635.1143597	306.3254048	26	0.48231535	60.07535449	0.094589822	565.5652568	894.5289564	456.7619286	26	0.510617264	89.57838412	0.100140284	796.5722885	HPAIVITGPH
63	Cy5 10%	7	8	3291.77732	5223.068549	17	1.586701664	1266.780195	0.38483168	1796.364396	4952.525063	7930.34059	17	1.601272177	1923.390112	0.388365548	2702.655383	HPKIVITGPH
63	Cy5 10%	8	9	818.1735822	420.888975	29	0.514425037	78.15712054	0.095526331	746.5121799	1662.384154	989.6620894	29	0.595326951	183.7756364	0.110549439	1516.780846	HPSIVITGPH
63	Cy5 10%	9	10	-29.35180924	9.851558437	30	-0.335637178	1.798640261	-0.061278685	-31.04625504	-40.83146441	15.37366945	30	-0.37651526	2.806835183	-0.068741967	-43.18861734	HPVIAVTGPS
63	Cy5 10%	10	11	53.41067144	46.25480413	74	0.866021768	5.377011761	0.100672986	45.76971951	80.59933304	70.97786889	74	0.880626008	8.251009662	0.102370694	69.06876034	HPVIAVTGPs
63	Cy5 10%	11	12	510.794745	143.0712353	25	0.280095355	28.61424706	0.056019071	504.97253	684.0505117	224.6133814	25	0.328357888	44.92267628	0.065671578	676.2534676	HPVIVITGPH
63	Cy5 10%	12	13	-36.13465572	8.394487247	37	-0.232311256	1.380045202	-0.038191735	-34.23094846	-54.24636098	16.66517339	37	-0.307212744	2.739737629	-0.050505464	-51.38846214	SCRAMBLED
63	Cy5 10%	13	14	733.5236973	352.7292837	34	0.48086965	60.49257309	0.082468465	639.7329221	1091.855995	561.9867656	34	0.514707771	96.37993518	0.088271655	952.2476623	HPVIVVTGPH
63	Cy5 10%	14	15	-19.18301187	10.3039566	37	-0.537139667	1.69396003	-0.088305217	-19.63353577	-26.41633612	14.79835046	37	-0.560196932	2.432833829	-0.092095808	-27.03673875	HPVIVINGPH
63	Cy5 10%	15	16	-33.97466	10.39799148	25	-0.306051377	2.079598297	-0.061210275	-36.38802824	-46.4532311	15.23398308	25	-0.327942378	3.046796616	-0.065588476	-49.75300666	HPVIAVTGPH
63	Cy5 10%	16	17	622.9075667	603.166995	30	0.968308987	110.122723	0.176788225	422.6958491	804.177053	789.950823	30	0.98230958	144.2246284	0.179344372	545.7026377	HAVIVITGPH
63	Cy5 10%	17	18	555.1265177	213.0620978	35	0.383808179	36.0140677	0.064875423	504.6029156	950.5315767	425.8450677	35	0.448007282	71.98095417	0.075727052	864.021065	HPAIVITGPH
63	Cy5 10%	18	19	1685.254629	1058.372384	11	0.628019271	319.1112807	0.189354935	1315.327036	2303.642628	1503.122422	11	0.652498093	453.2084625	0.196735577	1797.973658	HPKIVITGPH
63	Cy5 10%	19	20	688.4220921	808.6852994	22	1.174693998	172.4122851	0.250445602	636.8886765	927.9159291	1104.734438	22	1.19055445	235.5301736	0.253827062	858.4546528	HPSIVITGPH
63	Cy5 10%	20	21	-38.07227093	6.74196242	29	-0.177083275	1.251950992	-0.032883539	-38.85866072	-58.46620241	14.68829547	29	-0.251227117	2.727547994	-0.046651704	-59.67383263	HPVIAVTGPS
63	Cy5 10%	21	22	132.8497027	110.9194451	38	0.8349243	17.99351002	0.135442607	82.62800285	187.3754789	160.0911751	38	0.85438701	25.97021794	0.138599875	116.5411837	HPVIAVTGPs
63	Cy5 10%	22	23	526.2002614	166.734841	40	0.316865751	26.36309315	0.050100874	504.4020184	729.9789279	254.3857506	40	0.34848369	40.22191881	0.055100109	699.7389999	HPVIVITGPH
63	Cy5 10%	23	24	-37.14472929	6.416053811	34	-0.172731204	1.100344151	-0.029623157	-37.7145144	-50.56029788	11.76390932	34	-0.232670886	2.017493805	-0.039902728	-51.33587239	SCRAMBLED
63	Cy5 10%	24	25	510.4849938	198.8718429	41	0.389574317	31.05856385	0.060841287	484.6985341	637.0125624	271.1407824	41	0.425644325	42.34507599	0.066474476	604.8347335	HPVIVVTGPH
63	Cy5 10%	25	26	-16.95045851	10.45307981	51	-0.616684192	1.463723948	-0.086353059	-20.33685849	-24.20372774	15.66548532	51	-0.647234405	2.19360671	-0.090630945	-29.03920185	HPVIVINGPH
63	Cy5 10%	26	27	-33.92312544	6.821562076	21	-0.201088844	1.488586884	-0.043881183	-33.63613629	-73.05942346	27.08522645	21	-0.370728719	5.910480973	-0.080899639	-72.4413418	HPVIAVTGPH
63	Cy5 10%	27	28	537.0921429	461.5292975	27	0.859311207	88.82135472	0.165374519	396.800356	662.847265	577.2625455	27	0.870883197	111.0942287	0.167601549	489.7074631	HAVIVITGPH
63	Cy5 10%	28	29	101.3094783	81.07407975	47	0.800261546	11.82586995	0.116730144	86.9182938	173.5969832	143.4736481	47	0.826475469	20.92778246	0.120553837	148.937235	HPVIAVTGPs
63	Cy5 10%	29	30	1418.616626	639.9109714	35	0.451080975	108.164696	0.076246601	1181.532655	2449.49622	1215.750865	35	0.4963269	205.4994033	0.083894558	2040.128191	HPKIVITGPH
63	Cy5 10%	30	31	1085.653679	583.1945603	49	0.537182871	83.31350861	0.07674041	896.2940827	1815.742053	1057.128382	49	0.58220185	151.0183402	0.083171693	1499.040522	HPSIVITGPH
63	Cy5 10%	31	32	-33.87588579	5.776981423	20	-0.170533738	1.291772317	-0.038132503	-33.73202301	-60.2516673	16.45919048	20	-0.273174025	3.680386877	-0.061083569	-59.99579288	HPVIAVTGPS
63	Cy5 10%	32	33	753.1363374	488.187164	33	0.648205564	84.98247718	0.112838105	644.5849922	1138.583162	777.2824108	33	0.682675132	135.3075001	0.118838487	974.4764421	HPAIVITGPH
63	Cy5 10%	33	34	-12.19419447	13.60701807	24	-1.115860347	2.777520933	-0.227774039	-10.50582881	-19.8873465	22.65649998	24	-1.139241979	4.624738693	-0.232546795	-17.13381382	PALESPRIEITSCLGL
63	Cy5 10%	34	35	517.4651642	574.9609691	32	1.111110484	101.6397	0.196418439	354.6286509	786.7208172	889.418571	32	1.130539006	157.2284757	0.199852949	539.1546357	SPRIEITPSHEL
63	Cy5 10%	35	36	29.5642279	43.36816973	27	1.466913659	8.346208156	0.282307665	22.1822728	36.87586213	54.39749042	27	1.475151692	10.46880191	0.283893075	27.66824949	ASGLSPRIEITGSHEL
63	Cy5 10%	36	37	-34.98150753	7.497404884	46	-0.214324808	1.105432042	-0.031600469	-34.31524196	-84.73152087	33.44107636	46	-0.394671027	4.930617714	-0.058191068	-83.1177055	ATDTTPSVVVHVCESD
63	Cy5 10%	37	38	-0.652734155	12.4210211	18	-19.02921887	2.92766275	-4.485229902	-1.887085708	-0.954514124	18.16476955	18	-19.0303832	4.281477243	-4.485504337	-2.759546054	PIAIIITDTEIS
63	Cy5 10%	38	39	-20.42316162	11.16598534	39	-0.546731478	1.787988618	-0.087547102	-20.78452441	-28.97426184	17.5075196	39	-0.604243853	2.803446791	-0.096756453	-29.48692586	PALESPRIEITSCLGL
63	Cy5 10%	39	40	286.6984455	272.9177931	19	0.951933285	62.61163578	0.218388473	159.6549829	485.8036941	488.5618909	19	1.005677595	112.0837848	0.230718264	270.5315697	SPRIEITPSHEL
63	Cy5 10%	40	41	111.5146526	86.69652397	31	0.777445133	15.57115537	0.139633268	88.55897475	215.2968518	183.5926516	31	0.852741924	32.97421364	0.153156971	170.9772484	ASGLSPRIEITGSHEL
63	Cy5 10%	41	42	-33.19101556	7.620914867	29	-0.229607764	1.415168363	-0.042637091	-34.60185112	-53.55726941	19.96828641	29	-0.37283989	3.708017698	-0.069234629	-55.83380417	ATDTTPSVVVHVCESD
63	Cy5 10%	42	43	-1.867445551	11.84433314	39	-6.342531988	1.896611199	-1.015617938	-2.598105699	-2.675098923	16.97520734	39	-6.345637235	2.718208611	-1.016115175	-3.721763	PIAIIITDTEIS
63	Cy5 10%	43	44	-17.43483544	5.970563644	17	-0.342450244	1.448074385	-0.083056384	-19.36434755	-25.0749783	9.543519743	17	-0.380599322	2.314643526	-0.092308894	-27.85002452	PALESPRIEITSCLGL
63	Cy5 10%	44	45	753.0910096	1027.367812	34	1.364201403	176.1921261	0.23395861	373.8309818	1051.221065	1453.782366	34	1.382946379	249.3216188	0.237173347	521.8213972	SPRIEITPSHEL
63	Cy5 10%	45	46	4.739067377	23.65030742	30	4.990498244	4.317935622	0.911136154	-3.126382805	7.309402343	36.51949874	30	4.996235948	6.66751775	0.91218371	-4.82204366	ASGLSPRIEITGSHEL
63	Cy5 10%	46	47	-34.65078744	7.553552187	17	-0.21799078	1.832005501	-0.05287053	-36.06489918	-47.59305248	16.72795046	17	-0.351478831	4.057123921	-0.085246138	-49.53534295	ATDTTPSVVVHVCESD
63	Cy5 10%	47	48	2.949001778	8.644245519	27	2.931244594	1.663585826	0.564118285	1.049036267	4.751041034	13.98768726	27	2.944131014	2.691931668	0.566598278	1.690068276	PIAIIITDTEIS
