# Supplementary material for: Quantitative mapping of protein-peptide affinity landscapes using spectrally encoded beads
Source: eLife journal article supplement (doi:10.7554/elife.40499), 2019-07-08
Supplement: supp [file elife-40499-supp-v1.zip › elife_poa_e40499_Figure_3_source_data_1.csv]

	conc	code	AVG	SD	N	CV	SEM	RSEM	MED	AVG_NORM	SD_NORM	N_NORM	CV_NORM	SEM_NORM	RSEM_NORM	MED_NORM	library	sequence
1	1000	1	756.1359716	217.9102829	28	0.288189282	41.18117262	0.054462655	784.2978199	912.5807116	279.3909243	28	0.306154755	52.79992174	0.05785781	946.569254	Pos1to6	HFVIVITGPH
2	1000	2	884.7410897	589.5285888	50	0.666328936	83.37193257	0.094233142	819.9251174	1073.338863	722.1686402	50	0.672824459	102.1300685	0.095151748	994.7062519	Pos1to6	HLVIVITGPH
3	1000	3	514.4889591	274.3277845	34	0.533204415	47.0468269	0.091443803	492.7735897	597.501635	324.3143699	34	0.542784071	55.61945559	0.0930867	572.2824958	Pos1to6	HYVIVITGPH
4	1000	4	693.7781079	230.0319244	49	0.331564115	32.86170348	0.047366302	703.7826374	754.4197484	254.190377	49	0.336934946	36.31291099	0.048133564	765.2987521	Pos1to6	HSVIVITGPH
5	1000	5	5099.50942	1288.400314	42	0.252651816	198.8044846	0.038985022	5147.87598	5909.878734	1607.183316	42	0.271948612	247.9937697	0.041962582	5965.931284	Pos1to6	HRVIVITGPH
6	1000	6	1086.092284	709.8198336	70	0.653553887	84.83969726	0.07811463	948.0915577	1314.131283	869.8223881	70	0.661899157	103.9636603	0.079112081	1147.155535	Pos1to6	HIVIVITGPH
7	1000	7	14524.71629	5702.571151	51	0.392611534	798.519681	0.054976611	16230.35085	17153.37098	7054.683534	51	0.411270971	987.8532852	0.057589455	19167.68794	Pos1to6	HPTIVITGPH
8	1000	8	13097.6058	4171.712077	54	0.318509515	567.6981079	0.043343655	13590.18936	15149.47801	5054.941481	54	0.333671	687.890406	0.045406872	15719.22976	Pos1to6	HPSIVITGPH
9	1000	9	15281.1211	4520.454775	51	0.295819577	632.9902792	0.041423026	16000.37339	18663.37812	5731.791739	51	0.307114377	802.6113819	0.043004615	19541.82659	Pos1to6	HPIIVITGPH
10	1000	10	7744.983897	2913.521063	53	0.376181681	400.2028963	0.051672528	7179.055525	9871.006849	3927.584084	53	0.397890929	539.4951647	0.054654522	9149.729322	Pos1to6	HPNIVITGPH
11	1000	11	12389.2893	7524.653079	85	0.607351471	816.1632186	0.065876516	14777.96374	14581.55488	8953.993553	85	0.614063015	971.1969604	0.066604485	17392.90157	Pos1to6	HPQIVITGPH
12	1000	12	41461.76395	8432.555361	65	0.203381491	1045.929766	0.025226369	41537.41363	55613.19676	12741.70238	65	0.229112929	1580.413673	0.028417961	55714.66664	Pos1to6	HPRIVITGPH
13	1000	13	9036.682929	3228.743581	92	0.357293003	336.619788	0.037250371	9265.573953	11834.45819	4420.612067	92	0.373537343	460.8806675	0.03894396	12134.21434	Pos1to6	HPYIVITGPH
14	1000	14	8961.545366	4323.655502	66	0.482467624	532.2052022	0.059387659	10215.4524	10827.25901	5350.843762	66	0.494201141	658.6433367	0.060831955	12342.21829	Pos1to6	HPFIVITGPH
15	1000	15	19890.16752	6100.113945	64	0.306689923	762.5142431	0.03833624	19866.66076	22588.56074	7201.700992	64	0.318820711	900.212624	0.039852589	22561.86493	Pos1to6	HPLIVITGPH
16	1000	16	14291.23311	3672.674728	63	0.256987952	462.7135226	0.032377439	14809.21127	17653.33092	5029.006705	63	0.284875796	633.5952896	0.035890977	18293.16653	Pos1to6	HPAIVITGPH
17	1000	17	12574.84404	5541.624482	56	0.440691309	740.5307206	0.058889853	13567.58054	14827.20899	6680.027218	56	0.450524925	892.6561851	0.060203925	15997.76121	Pos1to6	HPVIVITGPH
18	1000	18	4987.805611	3192.936673	42	0.640148579	492.6808249	0.09877707	6187.902885	6043.112418	3956.574014	42	0.654724543	610.5126248	0.10102619	7497.12312	Pos1to6	HPVFVITGPH
19	1000	19	287.6424487	333.6783518	38	1.160045582	54.12977643	0.188184243	209.6931099	349.892525	407.6641739	38	1.165112555	66.13186163	0.189006215	255.0737974	Pos1to6	HPVYVITGPH
20	1000	20	3080.363435	1877.787867	51	0.609599454	262.9428952	0.085360997	3069.786462	3811.584465	2364.322261	51	0.62029906	331.0713375	0.086859242	3798.496714	Pos1to6	HPVVVITGPH
21	1000	21	442.0483873	497.0265282	58	1.124371319	65.26278045	0.147637187	317.3631087	507.7542793	573.1082683	58	1.128711843	75.25280235	0.148207126	364.5358317	Pos1to6	HPVMVITGPH
22	1000	22	362.7870149	213.5140096	49	0.58853818	30.50200138	0.084076883	324.3945569	488.3009301	296.8763885	49	0.607978339	42.41091264	0.086854048	436.6257813	Pos1to6	SCRAMBLED
23	1000	23	10166.59392	2969.604723	56	0.292094358	396.8301231	0.03903275	10457.28978	12226.62121	3802.888934	56	0.311033512	508.1824096	0.041563601	12576.21993	Pos1to6	HPVIYITGPH
24	1000	24	16341.23029	5740.117757	46	0.351265948	846.3341907	0.051791339	17620.42128	18654.41625	6764.316855	46	0.362612089	997.3441092	0.053464236	20114.68337	Pos1to6	HPVIRITGPH
25	1000	25	10381.13838	2989.194024	45	0.287944724	445.6027357	0.042924265	10506.07859	12390.75118	3851.146032	45	0.310808116	574.0949545	0.046332538	12539.8777	Pos1to6	HPVIKITGPH
26	1000	26	6942.480311	3273.47911	88	0.471514353	348.9540456	0.050263599	6812.921729	8523.715399	4122.799162	88	0.48368569	439.4918673	0.051561068	8364.64826	Pos1to6	HPVIIITGPH
27	1000	27	3204.716793	1557.016307	64	0.485851452	194.6270384	0.060731432	3147.030063	3991.763087	1986.656569	64	0.497688997	248.3320711	0.062211125	3919.909075	Pos1to6	HPVIQITGPH
28	1000	28	9002.99358	5022.27233	65	0.557844709	622.9362155	0.06919212	9808.792968	11611.2741	6597.095984	65	0.56816297	818.2690494	0.070471943	12650.52371	Pos1to6	HPVILITGPH
29	1000	29	1563.167568	789.2203686	54	0.504885327	107.3992888	0.068706191	1510.188613	1771.592706	902.2453631	54	0.509284871	122.7800424	0.069304893	1711.549796	Pos1to6	HPVISITGPH
30	1000	30	7781.699251	2628.114398	66	0.337730143	323.4985197	0.041571707	8410.936508	9548.036079	3361.273078	66	0.352038163	413.7441147	0.043332902	10320.10139	Pos1to6	HPVITITGPH
31	1000	31	203.4755558	155.0702301	61	0.762107416	19.85470843	0.097577856	170.5813963	247.7178088	191.0558837	61	0.771264224	24.46219924	0.098750265	207.6713812	Pos1to6	HPVIVDTGPH
32	1000	32	854.6658398	583.3981834	55	0.682603839	78.66539501	0.092042283	680.1293383	989.4859331	682.0761947	55	0.689323791	91.97113533	0.092948401	787.4170016	Pos1to6	HPVIVRTGPH
33	1000	33	228.429378	223.6591127	26	0.979117111	43.86316078	0.192020664	175.2310342	289.5295487	284.8646895	26	0.983888141	55.86656193	0.19295634	222.1017397	Pos1to6	HPVIVQTGPH
34	1000	34	233.042045	191.2241068	52	0.820556251	26.51801239	0.113790678	198.7170139	279.6907237	230.860967	52	0.825415172	32.01465592	0.11446449	238.494755	Pos1to6	HPVIVETGPH
35	1000	35	12852.05954	2649.98577	49	0.206191526	378.5693958	0.029455932	11935.64931	15237.41289	3410.416505	49	0.223818605	487.2023578	0.031974086	14150.91614	Pos1to6	HPVIVVTGPH
36	1000	36	5730.355998	1791.529467	61	0.312638424	229.3818432	0.040029248	5598.273033	6787.946539	2225.322655	61	0.32783444	284.9233695	0.041974899	6631.486433	Pos1to6	HPVIVLTGPH
37	1000	37	478.8597192	387.9319263	64	0.810116013	48.49149079	0.101264502	407.4565218	600.005172	489.421427	64	0.815695347	61.17767837	0.101961918	510.5378686	Pos1to6	HPVIVHTGPH
38	1000	38	237.2177373	256.0176021	42	1.079251514	39.50437366	0.166532124	191.9471389	290.6903028	314.9856031	42	1.083577952	48.60333374	0.167199708	235.2150078	Pos1to6	HPVIVSTGPH
39	1000	39	5631.341072	3164.596087	32	0.56196136	559.4268382	0.099341672	5079.827562	6396.038099	3639.876771	32	0.569083035	643.4453868	0.100600618	5769.632883	Pos1to6	HPVIFITGPH
40	1000	40	1023.157734	1351.85426	55	1.321256943	182.2839912	0.17815825	860.3370106	1199.722404	1588.49601	55	1.324052968	214.1927582	0.178535266	1008.803973	Pos1to6	HPVIVKTGPH
41	1000	41	2333.874647	1189.670193	49	0.509740399	169.9528848	0.072820057	2121.518716	2850.721914	1478.829991	49	0.518756313	211.2614272	0.074108045	2591.338786	Pos1to6	HPVIVIEGPH
42	1000	42	6695.548267	2299.671469	31	0.343462757	413.0331887	0.061687732	6814.636321	7712.305981	2755.553435	31	0.357293064	494.9120069	0.064171729	7849.478245	Pos1to6	HPVIVIHGPH
43	1000	43	1073.161733	640.9967994	46	0.59729748	94.50982199	0.088066709	995.2743822	1224.614298	736.9713416	46	0.60179874	108.6604962	0.088730383	1135.734905	Pos1to6	HPVIVIDGPH
44	1000	44	1826.901823	924.4274474	41	0.506008279	144.3713121	0.079025216	1902.11731	2941.559273	1553.655155	41	0.528174009	242.6401702	0.082486922	3062.666391	Pos1to6	HPVIVIQGPH
45	1000	45	5614.285123	3292.886571	47	0.586519298	480.3168717	0.085552632	5392.443746	6113.109418	3612.66638	47	0.590970345	526.9615508	0.086201884	5871.557629	Pos1to6	HPVIVISGPH
46	1000	46	5097.021995	2573.402677	50	0.504883573	363.9340967	0.07140132	5488.082027	6211.255566	3180.10469	50	0.511990636	449.7347183	0.07240641	6687.803205	Pos1to6	HPVIVIRGPH
47	1000	47	798.5687825	293.0288238	38	0.366942498	47.53555222	0.059525933	796.0967297	882.6436484	328.966098	38	0.37270545	53.36534792	0.060460808	879.911333	Pos1to6	HPVIVIFGPH
48	1000	48	2216.447628	1108.60739	11	0.500173059	334.2577048	0.150807852	2386.976115	3003.674532	1578.647997	11	0.525572255	475.9802801	0.158465997	3234.770484	Pos1to6	HPVIVIKGPH
49	125	1	116.9792979	98.38614376	33	0.841056029	17.12682928	0.146409062	103.9902002	141.1823467	119.6351012	33	0.84738003	20.82579799	0.147509929	125.5058012	Pos1to6	HFVIVITGPH
50	125	2	91.61234444	65.07655893	40	0.710347053	10.28950743	0.112315731	101.1814857	111.1410906	79.62632358	40	0.716443605	12.59002721	0.11327968	122.7500588	Pos1to6	HLVIVITGPH
51	125	3	24.21598084	80.28436942	34	3.315346586	13.76865576	0.568577249	28.61499251	28.12322382	93.28194217	34	3.31690075	15.9977211	0.568843786	33.23201502	Pos1to6	HYVIVITGPH
52	125	4	76.43145386	59.07679456	53	0.772938255	8.114821817	0.106171235	73.31661352	83.11216156	64.43331317	53	0.775257339	8.850596234	0.106489785	79.72505977	Pos1to6	HSVIVITGPH
53	125	5	748.4023347	228.8027206	41	0.305721548	35.73298161	0.047745684	734.6675104	867.3318701	279.1525814	41	0.321852097	43.59630878	0.050264853	851.414428	Pos1to6	HRVIVITGPH
54	125	6	121.3866217	102.8605152	47	0.847379339	15.00374818	0.12360298	117.4057107	146.8732991	125.4051632	47	0.853832275	18.29222306	0.124544238	142.0565448	Pos1to6	HIVIVITGPH
55	125	7	3180.160698	1352.805723	62	0.425389108	171.8064987	0.054024471	3182.680044	3755.699948	1662.532128	62	0.44266905	211.1417914	0.056219026	3758.675241	Pos1to6	HPTIVITGPH
56	125	8	2339.496513	1299.141378	27	0.555308106	250.0198748	0.106869095	2415.614121	2706.002266	1526.566944	27	0.564141044	293.7879454	0.108568995	2794.044466	Pos1to6	HPSIVITGPH
57	125	9	2632.888987	794.6374952	40	0.301812002	125.6432199	0.047720668	2631.634555	3215.641208	1006.14378	40	0.31289056	159.0852999	0.049472341	3214.109126	Pos1to6	HPIIVITGPH
58	125	10	1121.65103	629.1460469	50	0.560910684	88.97468722	0.07932475	988.2331245	1429.54784	822.9842847	50	0.575695518	116.3875537	0.081415641	1259.506291	Pos1to6	HPNIVITGPH
59	125	11	2378.645419	1278.061752	78	0.537306545	144.711997	0.060837986	2520.317047	2799.543046	1525.419347	78	0.544881548	172.7197294	0.061695686	2966.283249	Pos1to6	HPQIVITGPH
60	125	12	14996.93568	4234.25959	55	0.282341652	570.9474467	0.038070941	14991.6619	20115.58253	6062.955091	55	0.301405892	817.5286977	0.040641562	20108.50875	Pos1to6	HPRIVITGPH
61	125	13	1276.760413	527.3279637	52	0.413020296	73.12723123	0.05727561	1289.015638	1672.048012	714.2162848	52	0.427150584	99.04397833	0.059235128	1688.097479	Pos1to6	HPYIVITGPH
62	125	14	1588.199232	751.4923353	49	0.473172585	107.3560479	0.067596084	1584.135159	1918.848116	930.8926411	49	0.485130966	132.984663	0.069304424	1913.93794	Pos1to6	HPFIVITGPH
63	125	15	4991.862716	1766.304547	54	0.353836763	240.3636038	0.048151085	4856.856622	5669.082175	2065.821572	54	0.364401416	281.1227083	0.049588752	5515.760522	Pos1to6	HPLIVITGPH
64	125	16	2071.296453	877.2485516	56	0.423526314	117.2272687	0.056596084	2028.48249	2558.581295	1128.348712	56	0.441005613	150.781939	0.058931854	2505.695092	Pos1to6	HPAIVITGPH
65	125	17	2069.77104	659.4018308	48	0.318586848	95.17645612	0.045984051	2025.559344	2440.501661	810.3842133	48	0.332056407	116.9688859	0.047928214	2388.370911	Pos1to6	HPVIVITGPH
66	125	18	492.3007372	470.6272526	35	0.955975112	79.55052498	0.161589287	547.4091341	596.4604338	576.0592635	35	0.965796272	97.3717875	0.163249366	663.2285205	Pos1to6	HPVFVITGPH
67	125	19	-204.8569703	1206.023476	35	-5.887148844	203.8551744	-0.995109779	-17.49560767	-249.1910458	1467.2741	35	-5.888149372	248.0145897	-0.995278899	-21.2819157	Pos1to6	HPVYVITGPH
68	125	20	325.7463835	248.4808757	49	0.76280471	35.49726795	0.108972101	239.5655015	403.0725208	310.9229568	49	0.771382173	44.41756526	0.110197453	296.433899	Pos1to6	HPVVVITGPH
69	125	21	-22.79138566	43.62366643	57	-1.91404187	5.778095772	-0.253521039	-25.44931234	-26.17908793	50.17470526	57	-1.916594856	6.645802062	-0.25385919	-29.23208775	Pos1to6	HPVMVITGPH
70	125	22	5.980438881	71.74009922	45	11.99579172	10.69438257	1.788227049	-6.783343661	8.049499425	96.56792245	45	11.99676121	14.39549594	1.788371571	-9.130186261	Pos1to6	SCRAMBLED
71	125	23	1732.172183	828.0846113	50	0.478061373	117.1088488	0.067608088	1599.802804	2083.157182	1020.46088	50	0.489862642	144.3149617	0.069277039	1923.966183	Pos1to6	HPVIYITGPH
72	125	24	2643.070259	1462.111518	51	0.553186777	204.736564	0.077461643	3021.911245	3017.210571	1691.025729	51	0.560459964	236.7909649	0.078480093	3449.678466	Pos1to6	HPVIRITGPH
73	125	25	1345.17549	667.2954981	48	0.496065757	96.31580886	0.071600925	1277.757081	1605.578712	818.326718	48	0.50967711	118.1152877	0.073565554	1525.10924	Pos1to6	HPVIKITGPH
74	125	26	994.2514666	517.7053079	60	0.520698561	66.83546786	0.067221895	903.9339756	1220.70444	649.1038357	60	0.53174529	83.79894485	0.068648022	1109.816032	Pos1to6	HPVIIITGPH
75	125	27	286.9611458	211.9462307	53	0.738588599	29.11305377	0.101452946	289.7336396	357.4359244	266.800437	53	0.746428713	36.64785849	0.102529869	360.8893149	Pos1to6	HPVIQITGPH
76	125	28	1640.57303	740.4782994	64	0.451353452	92.55978743	0.056419181	1570.092225	2115.867679	981.8592264	64	0.464045666	122.7324033	0.058005708	2024.967699	Pos1to6	HPVILITGPH
77	125	29	169.346198	213.3403352	56	1.25978816	28.50880147	0.168346274	88.78858653	191.925994	242.1257357	56	1.261557805	32.35541241	0.168582753	100.6272236	Pos1to6	HPVISITGPH
78	125	30	1148.320662	474.2233831	68	0.412971219	57.50803231	0.050080116	1218.817849	1408.973382	598.464568	68	0.424752217	72.57448904	0.051508772	1495.472444	Pos1to6	HPVITITGPH
79	125	31	-26.84448554	35.93684963	25	-1.338705098	7.187369926	-0.26774102	-27.69227788	-32.68135629	43.92175042	25	-1.343939034	8.784350084	-0.268787807	-33.71348647	Pos1to6	HPVIVDTGPH
80	125	32	89.99363029	130.9411552	42	1.455004702	20.2046589	0.2245121	76.03456578	104.1897629	151.9263231	42	1.45816939	23.4427406	0.225000422	88.02871224	Pos1to6	HPVIVRTGPH
81	125	33	-14.20789087	139.4468091	34	-9.814743823	23.91493047	-1.683214679	-44.85697537	-18.00821009	176.7545606	34	-9.815220928	30.31315706	-1.683296502	-56.85529571	Pos1to6	HPVIVQTGPH
82	125	34	-32.65810548	63.95889033	49	-1.958438476	9.136984333	-0.279776925	-48.47049347	-39.1953699	76.8417096	49	-1.960479255	10.97738709	-0.280068465	-58.17296788	Pos1to6	HPVIVETGPH
83	125	35	1953.522211	766.301181	39	0.392266429	122.7063934	0.062812899	1937.622734	2316.097621	930.6355017	39	0.401811864	149.0209448	0.064341392	2297.247188	Pos1to6	HPVIVVTGPH
84	125	36	585.4913401	245.2882043	49	0.418944206	35.04117205	0.059849172	551.635186	693.549217	298.5057774	49	0.430403164	42.64368248	0.061486166	653.4445946	Pos1to6	HPVIVLTGPH
85	125	37	32.99993514	91.35280527	47	2.768272267	13.32517616	0.403794011	4.192579571	41.34850138	114.531634	47	2.769910159	16.70615582	0.404032922	5.253249178	Pos1to6	HPVIVHTGPH
86	125	38	-13.5482349	52.4364273	33	-3.870351208	9.128010351	-0.673741666	-16.31391788	-16.60221765	64.27647958	33	-3.87155987	11.1890989	-0.673952067	-19.99132857	Pos1to6	HPVIVSTGPH
87	125	39	778.4148782	561.5519648	40	0.72140446	88.78916166	0.11406406	706.4831895	884.1182153	642.7237364	40	0.726965835	101.6235457	0.114943391	802.4187026	Pos1to6	HPVIFITGPH
88	125	40	121.2212409	121.8588394	42	1.005259792	18.80322715	0.155114954	123.2826221	142.1401938	143.4097774	42	1.008931912	22.12860907	0.155681574	144.5573041	Pos1to6	HPVIVKTGPH
89	125	41	347.0048745	210.2296512	29	0.605840628	39.03866618	0.11250178	304.4321007	423.8506988	260.0094158	29	0.613445764	48.28253639	0.113914019	371.8499885	Pos1to6	HPVIVIEGPH
90	125	42	792.3471369	371.6510321	34	0.469050767	63.73762617	0.080441543	767.9161733	912.6696305	437.4157041	34	0.479270581	75.01617437	0.082194227	884.5286839	Pos1to6	HPVIVIHGPH
91	125	43	67.58568511	145.9800322	40	2.159925315	23.08146973	0.341514179	36.15403233	77.12387963	166.6781547	40	2.161174405	26.35413025	0.341711677	41.25635825	Pos1to6	HPVIVIDGPH
92	125	44	140.1987165	204.9057802	35	1.461538204	34.6353984	0.247045046	105.6807539	225.7389145	331.6916176	35	1.469359496	56.06611637	0.248367086	170.1603216	Pos1to6	HPVIVIQGPH
93	125	45	723.4098437	358.9350795	52	0.49617113	49.77533976	0.068806556	748.470769	787.6841719	394.9643949	52	0.501424821	54.77170684	0.069535112	814.9717384	Pos1to6	HPVIVISGPH
94	125	46	626.1737362	379.3696235	40	0.605853618	59.98360427	0.095793868	735.9169615	763.0583325	466.830579	40	0.611788849	73.81239555	0.096732311	896.7919558	Pos1to6	HPVIVIRGPH
95	125	47	79.70216242	49.73459927	40	0.624005645	7.86373061	0.098663956	73.48073427	88.09336022	55.27081608	40	0.627411827	8.739083347	0.09920252	81.21692808	Pos1to6	HPVIVIFGPH
96	125	48	458.9391866	157.2256384	13	0.342584907	43.60654622	0.095015957	447.1943777	621.9429368	235.5329386	13	0.378705062	65.32508363	0.105033886	606.0266647	Pos1to6	HPVIVIKGPH
97	2000	1	1251.983437	337.1019441	42	0.269254316	52.01595926	0.041546843	1250.545555	1511.019154	435.7805396	42	0.288401731	67.2423971	0.044501353	1509.283774	Pos1to6	HFVIVITGPH
98	2000	2	1449.857355	645.7940006	46	0.445418991	95.21713072	0.065673447	1487.071158	1758.919376	800.4466596	46	0.455078653	118.0194213	0.067097687	1804.06594	Pos1to6	HLVIVITGPH
99	2000	3	719.7074765	1059.467925	31	1.472081311	190.2860567	0.264393608	761.1817084	835.8321134	1233.335634	31	1.475578187	221.5136191	0.265021666	883.9982031	Pos1to6	HYVIVITGPH
100	2000	4	1225.920722	346.5783515	45	0.282708617	51.66485023	0.042143712	1232.769494	1333.075795	385.2440451	45	0.288988853	57.42879151	0.043079915	1340.523203	Pos1to6	HSVIVITGPH
101	2000	5	10495.72532	2900.63787	33	0.276363737	504.9362411	0.048108752	11059.23164	12163.61393	3577.426645	33	0.294108861	622.7500447	0.051197781	12816.66774	Pos1to6	HRVIVITGPH
102	2000	6	1925.490773	692.2511612	70	0.359519334	82.73983927	0.042970779	1867.302116	2329.772246	872.4428215	70	0.374475584	104.276862	0.044758393	2259.366135	Pos1to6	HIVIVITGPH
103	2000	7	21344.46539	7420.52436	59	0.347655667	966.0699853	0.045260913	23325.68249	25207.34491	9291.375953	59	0.368597962	1209.634117	0.047987367	27547.11879	Pos1to6	HPTIVITGPH
104	2000	8	18029.81671	7830.811687	41	0.43432564	1222.96732	0.067830269	19662.54869	20854.36956	9291.944823	41	0.445563449	1451.157978	0.06958532	22742.8855	Pos1to6	HPSIVITGPH
105	2000	9	21564.27579	5156.512314	48	0.239122907	744.2784431	0.034514419	22651.21722	26337.219	6662.316096	48	0.252962019	961.6224978	0.036511922	27664.73933	Pos1to6	HPIIVITGPH
106	2000	10	11136.85861	4295.192987	53	0.385673657	589.990131	0.052976351	11022.51712	14193.96206	5775.193399	53	0.406876767	793.2838221	0.055888822	14048.23347	Pos1to6	HPNIVITGPH
107	2000	11	19783.54294	9620.760655	84	0.486301199	1049.711046	0.053059811	22035.02089	23284.21026	11517.71845	84	0.494657896	1256.68611	0.053971601	25934.08374	Pos1to6	HPQIVITGPH
108	2000	12	47932.16155	7211.105813	65	0.150443994	894.4275956	0.018660281	46833.28157	64292.02421	11813.31586	65	0.183744656	1465.261497	0.02279072	62818.08237	Pos1to6	HPRIVITGPH
109	2000	13	13248.7903	3812.232275	59	0.287741914	496.3103683	0.037460806	13648.24186	17350.6425	5338.453663	59	0.30768046	695.0074688	0.040056584	17873.76507	Pos1to6	HPYIVITGPH
110	2000	14	13712.44606	6691.735622	40	0.488004518	1058.056303	0.077160289	14893.58163	16567.25476	8277.13327	40	0.499608015	1308.729682	0.078994963	17994.29221	Pos1to6	HPFIVITGPH
111	2000	15	25825.37044	6923.026533	56	0.268070754	925.1283345	0.035822461	26149.01361	29328.96106	8266.911033	56	0.281868526	1104.712455	0.037666266	29696.51117	Pos1to6	HPLIVITGPH
112	2000	16	20386.25275	7949.30079	58	0.389934378	1043.79433	0.051200892	21311.64443	25182.24028	10295.81772	58	0.408852334	1351.907098	0.053684942	26325.33587	Pos1to6	HPAIVITGPH
113	2000	17	20147.16073	5853.699248	61	0.290547106	749.4893878	0.037200745	20756.88934	23755.85429	7251.627699	61	0.305256448	928.475785	0.039084083	24474.79548	Pos1to6	HPVIVITGPH
114	2000	18	9380.224371	5194.79515	53	0.553802867	713.5599914	0.076070674	11187.86403	11364.8676	6484.66677	53	0.570588853	890.7374845	0.078376407	13554.96291	Pos1to6	HPVFVITGPH
115	2000	19	449.3756564	823.9034491	31	1.833440324	147.9774278	0.329295603	332.8146208	546.6271887	1003.963081	31	1.836650466	180.3170924	0.329872162	404.8406226	Pos1to6	HPVYVITGPH
116	2000	20	4807.827823	1812.04157	57	0.376894023	240.0107691	0.049920833	5047.010476	5949.116792	2343.744655	57	0.393965144	310.4365632	0.052181958	6245.076961	Pos1to6	HPVVVITGPH
117	2000	21	496.56926	299.3350123	46	0.602806167	44.13453976	0.08887892	479.0518401	570.3791123	348.4240708	46	0.610864008	51.37232657	0.090066984	550.2579103	Pos1to6	HPVMVITGPH
118	2000	22	1218.568017	3780.186552	50	3.102154742	534.5991091	0.438710931	454.3464605	1640.157645	5094.168193	50	3.105901562	720.4241747	0.439240811	611.5373212	Pos1to6	SCRAMBLED
119	2000	23	15233.43208	4731.593509	49	0.310605876	675.9419298	0.044372268	15751.8413	18320.13801	6017.788648	49	0.328479439	859.6840926	0.046925634	18943.59098	Pos1to6	HPVIYITGPH
120	2000	24	25643.39512	7251.264135	50	0.28277317	1025.483608	0.039990165	25958.70602	29273.35079	8686.86015	50	0.296749771	1228.507544	0.041966755	29633.29558	Pos1to6	HPVIRITGPH
121	2000	25	17057.84453	4577.292688	55	0.268339454	617.2020201	0.036182885	16999.288	20359.95471	5960.134056	55	0.29273808	803.6643122	0.039472795	20290.06263	Pos1to6	HPVIKITGPH
122	2000	26	11074.95828	5267.143139	66	0.475590337	648.3405022	0.058541124	10726.88309	13597.41595	6630.915223	66	0.487659953	816.2092413	0.060026791	13170.06236	Pos1to6	HPVIIITGPH
123	2000	27	6745.249601	2630.500458	65	0.389978224	326.2734261	0.048370845	6330.243124	8401.815234	3399.629433	65	0.404630349	421.6721344	0.050188218	7884.88733	Pos1to6	HPVIQITGPH
124	2000	28	15064.02591	7110.512671	43	0.472019413	1084.343017	0.071982286	16433.79987	19428.26377	9406.586068	43	0.484170185	1434.490927	0.073835261	21194.87847	Pos1to6	HPVILITGPH
125	2000	29	2631.911107	1307.313532	72	0.496716447	154.0683773	0.058538595	2334.369205	2982.837295	1494.961376	72	0.501187704	176.1828877	0.059065537	2645.622608	Pos1to6	HPVISITGPH
126	2000	30	11654.01271	5139.914019	73	0.441042424	601.5814333	0.051620111	12508.72016	14299.31051	6464.611195	73	0.452092511	756.6255104	0.052913426	15348.02458	Pos1to6	HPVITITGPH
127	2000	31	415.3288677	636.8071972	40	1.533260138	100.6880587	0.242429714	288.7217217	505.6349725	777.5816709	40	1.537832059	122.9464573	0.243152598	351.4992844	Pos1to6	HPVIVDTGPH
128	2000	32	1496.167105	1065.599605	33	0.712219645	185.4970814	0.123981526	1036.903023	1732.181439	1244.854231	33	0.718662724	216.7013065	0.125103122	1200.470298	Pos1to6	HPVIVRTGPH
129	2000	33	346.8735201	396.2290521	27	1.142286826	76.25431664	0.219833202	229.6513987	439.655068	504.0113251	27	1.146378972	96.99702474	0.220620736	291.0784348	Pos1to6	HPVIVQTGPH
130	2000	34	271.3653874	287.0372328	47	1.057751821	41.86868352	0.15428896	268.7923878	325.6853568	345.7233381	47	1.061525582	50.42893177	0.15483942	322.5973127	Pos1to6	HPVIVETGPH
131	2000	35	20514.30374	3907.427173	54	0.190473302	531.7334879	0.025920133	20188.51208	24321.77624	5093.650172	54	0.209427557	693.1579916	0.028499481	23935.51738	Pos1to6	HPVIVVTGPH
132	2000	36	10917.0568	3323.63753	69	0.304444466	400.1189394	0.036650807	10347.85259	12931.90126	4138.593699	69	0.320029794	498.228133	0.03852706	12257.64511	Pos1to6	HPVIVLTGPH
133	2000	37	826.6777307	689.8391953	50	0.834471729	97.55799458	0.118012124	644.0282004	1035.816741	869.9713829	50	0.839889286	123.0325329	0.118778282	806.95919	Pos1to6	HPVIVHTGPH
134	2000	38	428.5195954	747.0536666	46	1.743336068	110.147054	0.25704088	277.7129468	525.1145734	916.8593678	46	1.746017753	135.1835387	0.257436273	340.313762	Pos1to6	HPVIVSTGPH
135	2000	39	9422.020271	4157.926959	30	0.441298876	759.1301293	0.080569783	9646.485279	10701.46522	4819.22077	30	0.450332797	879.8653084	0.082219144	10956.41102	Pos1to6	HPVIFITGPH
136	2000	40	1860.834743	1264.425594	44	0.679493759	190.6193305	0.102437538	1702.022061	2181.955976	1494.453682	44	0.684914681	225.2973695	0.103254773	1995.737246	Pos1to6	HPVIVKTGPH
137	2000	41	3955.996214	1090.852078	24	0.275746492	222.6692479	0.056286517	3819.352907	4832.069756	1411.336376	24	0.292076987	288.0878313	0.059619965	4665.166162	Pos1to6	HPVIVIEGPH
138	2000	42	9731.395207	3298.36333	39	0.338940436	528.1608306	0.054273906	10149.54197	11209.16383	3956.251895	39	0.352947995	633.5073119	0.056516911	11690.8086	Pos1to6	HPVIVIHGPH
139	2000	43	1491.370743	1041.342272	62	0.698245072	132.2506008	0.088677213	1504.3874	1701.844074	1194.863772	62	0.70209944	151.7478508	0.089166718	1716.697738	Pos1to6	HPVIVIDGPH
140	2000	44	3627.954942	2306.754169	27	0.635827678	443.9350467	0.122365094	3597.725803	5841.498634	3818.036049	27	0.653605571	734.7813803	0.125786451	5792.825626	Pos1to6	HPVIVIQGPH
141	2000	45	8728.067404	4314.687619	34	0.494346276	739.9628221	0.084779687	8488.092331	9503.548514	4748.154895	34	0.499619157	814.3018465	0.085683978	9242.251868	Pos1to6	HPVIVISGPH
142	2000	46	9281.67955	5398.909243	24	0.581673738	1102.047734	0.118733655	10926.41348	11310.69943	6649.030301	24	0.587853151	1357.227627	0.119995022	13314.98012	Pos1to6	HPVIVIRGPH
143	2000	47	1413.221168	650.5568115	38	0.460336164	105.5342505	0.074676387	1388.971859	1562.007826	726.2445143	38	0.464942942	117.8124172	0.075423705	1535.205503	Pos1to6	HPVIVIFGPH
144	2000	48	5491.367891	1275.965942	11	0.232358488	384.7182067	0.07005872	5354.117593	7441.764776	2105.422074	11	0.282919729	634.8086403	0.085303508	7255.766595	Pos1to6	HPVIVIKGPH
145	250	1	190.2118335	64.3353464	22	0.338229989	13.71634194	0.072110876	173.1021332	229.566714	81.18914885	22	0.353662547	17.3095847	0.075401108	208.917012	Pos1to6	HFVIVITGPH
146	250	2	366.1107976	1076.390445	47	2.940067465	157.0076831	0.428852916	202.0040062	444.1536081	1306.498445	47	2.941546396	190.5723846	0.42906864	245.0646329	Pos1to6	HLVIVITGPH
147	250	3	135.4531147	540.9171912	43	3.993390572	82.48909833	0.608986353	74.18382596	157.3084438	628.3970432	43	3.994680946	95.82965068	0.609183133	86.15336932	Pos1to6	HYVIVITGPH
148	250	4	200.2428084	87.34428765	43	0.436191883	13.31987899	0.066518639	202.9773151	217.7455982	95.87083109	43	0.440288263	14.62016468	0.067143331	220.7191222	Pos1to6	HSVIVITGPH
149	250	5	1511.70241	690.2637811	41	0.456613535	107.8010914	0.071311053	1447.420142	1751.928899	819.1443795	41	0.467567137	127.9288593	0.073021719	1677.431457	Pos1to6	HRVIVITGPH
150	250	6	406.6026417	878.5347612	56	2.160671553	117.3991457	0.288731881	294.7117397	491.974079	1064.24346	56	2.163210431	142.2155144	0.289071153	356.5902477	Pos1to6	HIVIVITGPH
151	250	7	5540.634429	2150.733438	56	0.388174579	287.4038448	0.05187201	5867.547845	6543.367589	2663.395759	56	0.407037465	355.9112291	0.054392669	6929.445156	Pos1to6	HPTIVITGPH
152	250	8	4310.641296	2055.730975	45	0.476896785	306.4502803	0.071091575	4253.932445	4985.946784	2428.921611	45	0.487153537	362.0822556	0.072620562	4920.353919	Pos1to6	HPSIVITGPH
153	250	9	5413.542116	1686.659897	40	0.311563088	266.6843456	0.04926245	5447.027441	6611.752033	2131.011642	40	0.322306649	336.9425255	0.050961156	6652.648854	Pos1to6	HPIIVITGPH
154	250	10	2261.652641	958.8606488	71	0.423964596	113.7958231	0.050315341	2087.755808	2882.483554	1277.92077	71	0.443340177	151.6612931	0.052614799	2660.851483	Pos1to6	HPNIVITGPH
155	250	11	4905.22001	2590.73488	73	0.528158752	303.2225825	0.061816306	5019.482447	5773.191103	3093.63999	73	0.535863084	362.0831735	0.06271803	5907.672101	Pos1to6	HPQIVITGPH
156	250	12	23328.49205	6502.311343	68	0.278728318	788.5210729	0.033800773	23122.18152	31290.80615	9325.404586	68	0.298023788	1130.871415	0.036140693	31014.07919	Pos1to6	HPRIVITGPH
157	250	13	3009.800983	977.8427619	69	0.324886186	117.7184351	0.039111701	2897.976765	3941.641438	1350.6832	69	0.342670236	162.6031493	0.041252649	3795.196217	Pos1to6	HPYIVITGPH
158	250	14	3165.331951	1681.046471	43	0.531080625	256.3571835	0.080989036	3102.61496	3824.325771	2071.875527	43	0.5417623	315.9580558	0.082617976	3748.551664	Pos1to6	HPFIVITGPH
159	250	15	7836.364701	4465.363069	80	0.569825836	499.2427683	0.063708465	8520.212988	8899.482612	5130.066751	80	0.576445505	573.5588992	0.064448567	9676.104959	Pos1to6	HPLIVITGPH
160	250	16	4310.848379	1766.692681	62	0.409824824	224.3701948	0.052047805	4379.537064	5325.001166	2278.37752	62	0.427864229	289.3542344	0.054338811	5409.849274	Pos1to6	HPAIVITGPH
161	250	17	4297.236949	1351.359472	42	0.314471715	208.5192935	0.048524039	4251.120685	5066.943981	1662.516267	42	0.328110252	256.5318293	0.050628511	5012.567523	Pos1to6	HPVIVITGPH
162	250	18	1430.026862	730.8475921	41	0.511072632	114.1392178	0.079816136	1474.87771	1732.588189	916.912874	41	0.529215702	143.1977329	0.082649607	1786.928461	Pos1to6	HPVFVITGPH
163	250	19	15.59614306	100.5949152	35	6.449986696	17.00364412	1.09024674	27.77312021	18.97137887	122.3824666	35	6.450899929	20.68641247	1.090401104	33.78363381	Pos1to6	HPVYVITGPH
164	250	20	765.5248491	411.4488878	53	0.537472935	56.51685127	0.073827586	623.8260415	947.2462206	520.5862079	53	0.549578554	71.5080151	0.07549042	771.9107496	Pos1to6	HPVVVITGPH
165	250	21	12.15899537	80.27505227	51	6.602112249	11.24075569	0.924480629	-3.802012094	13.96630348	92.21744671	51	6.602852846	12.9130254	0.924584334	-4.367141621	Pos1to6	HPVMVITGPH
166	250	22	44.77416489	226.8761806	52	5.067122552	31.46206548	0.702683468	15.21082628	60.26474339	305.5071307	52	5.069417267	42.36621634	0.703001688	20.47333646	Pos1to6	SCRAMBLED
167	250	23	3768.493136	1021.297889	61	0.271009619	130.7637952	0.034699226	3696.991821	4532.091913	1320.301484	61	0.291322751	169.0472826	0.037300056	4446.102496	Pos1to6	HPVIYITGPH
168	250	24	4734.376527	2429.261325	58	0.513111137	318.9776391	0.067374793	4946.414229	5404.552096	2815.469761	58	0.520944143	369.6892911	0.068403317	5646.604836	Pos1to6	HPVIRITGPH
169	250	25	3118.756822	1437.245825	55	0.460839337	193.7981875	0.062139563	2712.639048	3722.495391	1769.898456	55	0.475460214	238.6530591	0.064111042	3237.760086	Pos1to6	HPVIKITGPH
170	250	26	2439.879576	1291.580694	85	0.529362476	140.0915956	0.057417422	2395.133266	2995.592092	1618.314925	85	0.540232073	175.5308988	0.058596395	2940.65426	Pos1to6	HPVIIITGPH
171	250	27	878.7438964	939.4564266	74	1.06909013	109.2095913	0.124279203	741.2082503	1094.554582	1176.122409	74	1.07452148	136.7214529	0.124910585	923.2415608	Pos1to6	HPVIQITGPH
172	250	28	2879.802288	1409.204599	57	0.489340746	186.6537089	0.064814765	3049.83595	3714.117247	1861.03889	57	0.501071659	246.5006228	0.066368563	3933.4118	Pos1to6	HPVILITGPH
173	250	29	416.3113802	430.6770864	68	1.034507119	52.22726817	0.125452415	345.5968701	471.8203089	489.1179035	68	1.036661403	59.31425822	0.125713661	391.6770709	Pos1to6	HPVISITGPH
174	250	30	2220.061123	1074.533706	59	0.484010866	139.892373	0.063012847	2239.828029	2723.983929	1345.923014	59	0.494100938	175.2242515	0.064326463	2748.237646	Pos1to6	HPVITITGPH
175	250	31	-0.519592053	98.8045041	48	-190.157843	14.26120176	-27.44692046	-20.71942127	-0.632568391	120.2878641	48	-190.1578799	17.36205768	-27.44692579	-25.22450235	Pos1to6	HPVIVDTGPH
176	250	32	218.7182281	287.8660024	49	1.31615003	41.12371463	0.188021433	147.1977478	253.2201475	334.1613983	49	1.319647752	47.73734262	0.188521107	170.4175996	Pos1to6	HPVIVRTGPH
177	250	33	-41.79164243	61.20036974	33	-1.464416476	10.65361691	-0.254922188	-28.62878215	-52.97004912	77.73941096	33	-1.467610702	13.53269444	-0.255478231	-36.28639384	Pos1to6	HPVIVQTGPH
178	250	34	-25.96964904	99.47474527	53	-3.830423166	13.66390711	-0.526149086	-40.94955272	-31.1680664	119.4194175	53	-3.831466987	16.40351853	-0.526292466	-49.14653935	Pos1to6	HPVIVETGPH
179	250	35	3898.354064	1457.146507	40	0.37378506	230.3950923	0.059100607	3801.130932	4621.891948	1773.837894	40	0.383790429	280.4683973	0.060682595	4506.624119	Pos1to6	HPVIVVTGPH
180	250	36	1621.823708	790.4735653	57	0.487397959	104.7007815	0.064557437	1545.981765	1921.14637	955.3515465	57	0.497282019	126.5394036	0.065866613	1831.30709	Pos1to6	HPVIVLTGPH
181	250	37	72.18142871	135.1664946	61	1.872593782	17.30629624	0.239761065	41.01679322	90.44241728	169.5808208	61	1.875014245	21.71259919	0.240070974	51.39352316	Pos1to6	HPVIVHTGPH
182	250	38	181.6997243	853.8501999	44	4.699237731	128.7227609	0.708436743	1.301110083	222.6576666	1046.542968	44	4.700233249	157.7722887	0.708586823	1.594400522	Pos1to6	HPVIVSTGPH
183	250	39	1940.088362	1465.189309	35	0.755217823	247.6621957	0.127655111	1705.759779	2203.538894	1675.861795	35	0.760531979	283.2723453	0.128553368	1937.390117	Pos1to6	HPVIFITGPH
184	250	40	277.5454138	451.6452574	42	1.627284166	69.69037621	0.251095398	168.8605511	325.4409756	530.3240302	42	1.629555188	81.83077443	0.251445824	198.0005424	Pos1to6	HPVIVKTGPH
185	250	41	664.5293686	314.2519486	47	0.472893996	45.83835781	0.068978679	565.954855	811.6924514	391.7217764	47	0.482598767	57.13849358	0.070394265	691.2881586	Pos1to6	HPVIVIEGPH
186	250	42	1797.44982	806.8820886	43	0.448903819	123.0483649	0.068457191	1632.98324	2070.402966	951.49897	43	0.459571873	145.1022326	0.070084054	1880.961186	Pos1to6	HPVIVIHGPH
187	250	43	188.2940344	229.4553177	35	1.218601101	38.78502761	0.205981181	207.3330658	214.8674889	262.3131739	35	1.220813699	44.33901899	0.206355178	236.59345	Pos1to6	HPVIVIDGPH
188	250	44	379.897336	245.2723425	34	0.645627961	42.06385972	0.110724282	375.9280203	611.686144	405.6354914	34	0.663143175	69.56591285	0.113728116	605.2950083	Pos1to6	HPVIVIQGPH
189	250	45	1749.454195	1122.651475	47	0.641715272	163.7555478	0.093603793	1560.377314	1904.891662	1230.152357	47	0.645785995	179.4361631	0.094197569	1699.015466	Pos1to6	HPVIVISGPH
190	250	46	1243.975294	864.6436563	51	0.695064975	121.0743292	0.097328564	1327.26279	1515.914289	1061.510587	51	0.700244463	148.6412134	0.098053838	1617.408832	Pos1to6	HPVIVIRGPH
191	250	47	202.1323071	109.5043026	35	0.541745672	18.50960545	0.091571732	181.0955546	223.4131873	121.9088872	35	0.545665584	20.60636295	0.092234318	200.1616448	Pos1to6	HPVIVIFGPH
192	250	48	1150.743394	1123.961725	12	0.976726636	324.4598022	0.281956693	879.0331308	1559.458741	1543.82322	12	0.989973751	445.6633758	0.285780806	1191.24377	Pos1to6	HPVIVIKGPH
193	500	1	335.5980303	226.7052541	41	0.675526176	35.40541237	0.105499464	364.6910815	405.0333548	276.793194	41	0.683383704	43.22783438	0.106726604	440.1457663	Pos1to6	HFVIVITGPH
194	500	2	401.6807702	166.8876129	38	0.415473245	27.07274573	0.06739866	417.0962273	487.3059319	207.5010911	38	0.425812775	33.66112189	0.069075953	506.0074587	Pos1to6	HLVIVITGPH
195	500	3	627.0305895	2121.344478	25	3.383159472	424.2688957	0.676631894	188.8184395	728.2018319	2464.731996	25	3.384682498	492.9463991	0.6769365	219.2842516	Pos1to6	HYVIVITGPH
196	500	4	622.8301389	1681.174947	47	2.699251115	245.2245693	0.393726241	371.5435469	677.2703712	1828.573183	47	2.699916106	266.7248118	0.39382324	404.019363	Pos1to6	HSVIVITGPH
197	500	5	2420.671404	693.1583078	32	0.286349608	122.534235	0.050619937	2443.787203	2805.343274	851.4538282	32	0.303511458	150.517194	0.053653753	2832.132433	Pos1to6	HRVIVITGPH
198	500	6	471.6183553	215.4043305	49	0.456734408	30.77204722	0.065247773	441.0217238	570.6406752	267.4011066	49	0.468598048	38.20015809	0.066942578	533.6198886	Pos1to6	HIVIVITGPH
199	500	7	9315.759575	3680.007253	49	0.395030295	525.7153218	0.056432899	9870.574063	11001.70749	4550.09299	49	0.413580619	650.0132843	0.059082946	11656.93121	Pos1to6	HPTIVITGPH
200	500	8	7730.382317	3502.455112	43	0.453076571	534.1193973	0.069093529	8146.437608	8941.424768	4147.572228	43	0.463860328	632.4988352	0.070738037	9422.659321	Pos1to6	HPSIVITGPH
201	500	9	9016.197189	2909.300135	45	0.322674857	433.6928579	0.048101528	8929.497453	11011.80314	3667.593105	45	0.333060177	546.7324997	0.04964968	10905.91366	Pos1to6	HPIIVITGPH
202	500	10	4847.908176	2098.821994	59	0.432933529	273.2433497	0.056363145	5319.54466	6178.674539	2792.29591	59	0.451924744	363.5259636	0.05883559	6779.776753	Pos1to6	HPNIVITGPH
203	500	11	9034.116417	4241.193634	67	0.469464133	518.1442697	0.057354172	9117.115699	10632.68934	5083.650452	67	0.478115206	621.066751	0.058411069	10730.37522	Pos1to6	HPQIVITGPH
204	500	12	34040.6888	7031.711505	54	0.206567838	956.8947337	0.028110322	32191.699	45659.21331	10590.47467	54	0.231946061	1441.18106	0.031563861	43179.13953	Pos1to6	HPRIVITGPH
205	500	13	5165.170277	1794.681628	66	0.347458367	220.9100375	0.042769168	5347.232803	6764.317412	2463.169999	66	0.364141694	303.1952678	0.044822744	7002.746864	Pos1to6	HPYIVITGPH
206	500	14	6068.128755	2305.47232	38	0.379931345	373.9969962	0.061633003	6459.633156	7331.458925	2893.907906	38	0.394724697	469.4538531	0.064032801	7804.471043	Pos1to6	HPFIVITGPH
207	500	15	15498.03777	5395.333175	49	0.348130083	770.7618821	0.049732869	15139.34347	17600.5741	6316.190871	49	0.358862775	902.3129816	0.051266111	17193.21766	Pos1to6	HPLIVITGPH
208	500	16	7793.912972	3026.79496	40	0.388353703	478.5783042	0.061404112	8013.160884	9627.477473	3921.705535	40	0.407345075	620.0760902	0.064406912	9898.304765	Pos1to6	HPAIVITGPH
209	500	17	8477.669953	2653.987208	44	0.313056208	400.1036259	0.047194999	7818.697685	9996.162475	3266.284406	44	0.326753833	492.4109016	0.049259994	9219.15725	Pos1to6	HPVIVITGPH
210	500	18	3335.871996	1607.25898	32	0.481810748	284.125931	0.085172912	3448.981569	4041.667029	2024.934153	32	0.501014591	357.9611678	0.088567704	4178.708028	Pos1to6	HPVFVITGPH
211	500	19	46.46036421	117.445662	40	2.527867871	18.56978966	0.399691005	36.49615374	56.51507355	142.9942766	40	2.530197124	22.60938032	0.400059292	44.3944607	Pos1to6	HPVYVITGPH
212	500	20	1736.649043	1080.748927	58	0.622318557	141.9092865	0.08171443	1433.495884	2148.89725	1359.828933	58	0.632803143	178.5542864	0.083091123	1773.781165	Pos1to6	HPVVVITGPH
213	500	21	112.2164172	184.5799067	51	1.644856531	25.84635672	0.230325984	67.52040456	128.8962196	212.398622	51	1.64782662	29.74175602	0.23074188	77.55660997	Pos1to6	HPVMVITGPH
214	500	22	172.6249776	142.1610479	50	0.823525367	20.1046082	0.116464074	171.8900623	232.348275	194.5983733	50	0.837528806	27.52036587	0.11844446	231.3591001	Pos1to6	SCRAMBLED
215	500	23	6695.311474	1654.166146	65	0.24706336	205.1740589	0.030644438	6583.748938	8051.962919	2167.504596	65	0.26918959	268.8458573	0.033388859	7917.794792	Pos1to6	HPVIYITGPH
216	500	24	10053.13908	3737.123647	46	0.371736989	551.0088209	0.054809629	10401.33747	11476.21309	4389.379964	46	0.382476339	647.1787682	0.05639306	11873.70077	Pos1to6	HPVIRITGPH
217	500	25	6450.173117	2106.182988	44	0.326531234	317.5190324	0.049226436	6345.757255	7698.817532	2670.415271	44	0.346860444	402.5802495	0.052291179	7574.188525	Pos1to6	HPVIKITGPH
218	500	26	4693.930037	2219.490515	72	0.472842692	261.5694657	0.055725046	4220.419787	5763.030207	2794.958386	72	0.484980693	329.3890046	0.057155523	5181.672187	Pos1to6	HPVIIITGPH
219	500	27	1691.134141	928.2739404	77	0.548906156	105.7866334	0.062553662	1564.020844	2106.459721	1178.376749	77	0.559411005	134.2884936	0.063750801	1948.128673	Pos1to6	HPVIQITGPH
220	500	28	6445.726488	2484.319596	79	0.385421194	279.507792	0.043363272	6069.225087	8313.134556	3326.998483	79	0.400209868	374.316574	0.045027128	7827.555963	Pos1to6	HPVILITGPH
221	500	29	865.076225	659.4286903	63	0.762278134	83.08020581	0.096038018	684.9562791	980.4212691	750.2175861	63	0.765199216	94.51853152	0.096406039	776.2850082	Pos1to6	HPVISITGPH
222	500	30	4553.829085	1415.675193	47	0.310875785	206.49745	0.045345894	4918.275158	5587.484558	1823.549634	47	0.326363253	265.9920518	0.047604973	6034.654789	Pos1to6	HPVITITGPH
223	500	31	141.217982	267.055549	37	1.891087418	43.90366182	0.310892856	82.11466964	171.9233985	325.759792	37	1.89479614	53.55457991	0.311502567	99.96908944	Pos1to6	HPVIVDTGPH
224	500	32	417.8851286	269.0522155	38	0.643842523	43.64603276	0.104445049	362.8674042	483.8048243	314.9389116	38	0.650962735	51.0898378	0.1056001	420.1082754	Pos1to6	HPVIVRTGPH
225	500	33	26.17578101	80.44683935	25	3.073331005	16.08936787	0.614666201	41.15859164	33.17726524	102.015257	25	3.074854309	20.4030514	0.614970862	52.16767024	Pos1to6	HPVIVQTGPH
226	500	34	20.88275469	90.05433901	45	4.312378341	13.42450825	0.642851408	8.428926995	25.06291417	108.1040063	45	4.31330553	16.11519378	0.642989625	10.11616891	Pos1to6	HPVIVETGPH
227	500	35	7849.359121	2300.042886	43	0.293023016	350.7532518	0.044685591	8024.496236	9306.206959	2844.752523	43	0.30568335	433.8206927	0.046616274	9513.849674	Pos1to6	HPVIVVTGPH
228	500	36	3175.090694	1057.150566	61	0.332951297	135.3542601	0.042630045	3027.0679	3761.083237	1306.072114	61	0.347259561	167.2253984	0.044462031	3585.741459	Pos1to6	HPVIVLTGPH
229	500	37	236.8195634	188.8436165	51	0.79741561	26.44339552	0.11166052	180.9374246	296.7319179	238.3004132	51	0.803083184	33.36873227	0.112454139	226.7123046	Pos1to6	HPVIVHTGPH
230	500	38	70.52432207	128.2769091	36	1.818903115	21.37948484	0.303150519	40.80335194	86.42160055	157.4146594	36	1.821473549	26.23577657	0.303578925	50.00106174	Pos1to6	HPVIVSTGPH
231	500	39	2788.474096	1709.488396	23	0.613055147	356.4529713	0.127830835	2886.17305	3167.129522	1962.321206	23	0.619589818	409.1722564	0.129193408	3278.095316	Pos1to6	HPVIFITGPH
232	500	40	548.5530335	360.3881114	42	0.656979525	55.60909288	0.101374142	512.2112382	643.2159406	426.1850236	42	0.662584673	65.76177684	0.102239035	600.6027006	Pos1to6	HPVIVKTGPH
233	500	41	1567.879686	870.2027341	44	0.555018821	131.1879982	0.083672235	1330.064469	1915.093848	1078.792491	44	0.563310509	162.6340872	0.084922255	1624.613358	Pos1to6	HPVIVIEGPH
234	500	42	3740.564264	1705.619557	38	0.455979215	276.6880285	0.073969596	4093.187681	4308.590573	2009.894986	38	0.46648549	326.048021	0.075673939	4714.761895	Pos1to6	HPVIVIHGPH
235	500	43	515.0956672	412.9792099	52	0.801752444	57.26991219	0.111183059	458.6062276	587.7897985	473.2362887	52	0.805111436	65.62606555	0.111648868	523.3281491	Pos1to6	HPVIVIDGPH
236	500	44	983.9592596	643.1932485	27	0.653678739	123.7825984	0.125800532	847.1245869	1584.307623	1063.044797	27	0.67098383	204.5830665	0.129130898	1363.985274	Pos1to6	HPVIVIQGPH
237	500	45	3141.59892	1594.791705	39	0.507636954	255.3710515	0.081286968	3301.818084	3420.72722	1754.057187	39	0.512773184	280.873939	0.082109423	3595.181716	Pos1to6	HPVIVISGPH
238	500	46	2110.420086	1465.414321	44	0.694370913	220.9195212	0.104680354	2551.798312	2571.768088	1799.094613	44	0.69955554	271.223718	0.105461966	3109.63372	Pos1to6	HPVIVIRGPH
239	500	47	457.0812296	186.8295613	33	0.408744768	32.5228521	0.071153331	441.9056561	505.2036254	209.1169816	33	0.41392613	36.40259398	0.07205529	488.4303382	Pos1to6	HPVIVIFGPH
240	500	48	1634.016033	627.3886634	7	0.383955023	237.1306255	0.145121358	1829.807153	2214.377765	922.2944948	7	0.41650278	348.5945527	0.157423254	2479.709007	Pos1to6	HPVIVIKGPH
241	63	1	4.352021355	31.45338011	26	7.227303715	6.168515344	1.417390872	-4.503259754	5.252455768	37.96497289	26	7.228042381	7.445543754	1.417535736	-5.434985432	Pos1to6	HFVIVITGPH
242	63	2	-6.86894654	53.30626946	37	-7.760472315	8.763496716	-1.27581379	6.866564788	-8.333180583	64.67408725	37	-7.761032731	10.63235445	-1.275905921	8.330291119	Pos1to6	HLVIVITGPH
243	63	3	-28.36097891	52.05104556	26	-1.83530497	10.20804989	-0.359932918	-32.4650638	-32.93701638	60.54189108	26	-1.838110969	11.87324169	-0.360483219	-37.70329443	Pos1to6	HYVIVITGPH
244	63	4	67.85803836	309.3979115	37	4.559487998	50.86470332	0.74957521	-3.184450571	73.78936239	336.4707639	37	4.559881709	55.31545284	0.749639935	-3.462796492	Pos1to6	HSVIVITGPH
245	63	5	394.1785617	499.3299371	30	1.266760767	91.16475674	0.231277816	274.3486703	456.8179618	580.5014942	30	1.270750152	105.9845877	0.232006174	317.9457549	Pos1to6	HRVIVITGPH
246	63	6	12.01529467	111.6593471	63	9.293101016	14.06775543	1.170820676	7.990625614	14.53805983	135.1122451	63	9.29369164	17.02254284	1.170895088	9.668359902	Pos1to6	HIVIVITGPH
247	63	7	1416.721404	587.8466336	53	0.414934532	80.7469451	0.056995641	1368.686172	1673.116868	723.8443089	53	0.432632246	99.42766248	0.059426609	1616.388313	Pos1to6	HPTIVITGPH
248	63	8	1256.189548	645.4997844	53	0.513855401	88.66621441	0.070583468	1194.276425	1452.984326	760.4751154	53	0.523388382	104.4592907	0.071892923	1381.371887	Pos1to6	HPSIVITGPH
249	63	9	1159.226467	507.7414031	29	0.438000182	94.28521156	0.081334592	1117.569956	1415.804622	631.0331535	29	0.445706381	117.1799148	0.082765597	1364.92804	Pos1to6	HPIIVITGPH
250	63	10	350.5342986	304.2387966	35	0.867928753	51.42574268	0.146706736	267.0033783	446.7570893	392.0544459	35	0.877556183	66.26929661	0.148334068	340.2966631	Pos1to6	HPNIVITGPH
251	63	11	1226.709156	850.9091286	47	0.693651893	124.1178528	0.101179527	1140.775743	1443.773444	1009.971408	47	0.699535936	147.3194708	0.102037803	1342.634246	Pos1to6	HPQIVITGPH
252	63	12	9336.370044	2433.935445	61	0.260693978	311.6335003	0.033378444	9483.004253	12522.99311	3521.835573	61	0.281229538	450.9248384	0.036007753	12719.67546	Pos1to6	HPRIVITGPH
253	63	13	526.3008668	313.7930397	52	0.59622368	43.51526517	0.082681348	472.5215493	689.2446768	417.7496766	52	0.606097792	57.9314569	0.084050641	618.8151741	Pos1to6	HPYIVITGPH
254	63	14	611.6119494	351.3546309	46	0.57447313	51.80441408	0.084701442	609.240221	738.9440907	431.8109667	46	0.584362162	63.66705362	0.0861595	736.0785896	Pos1to6	HPFIVITGPH
255	63	15	2658.507312	1319.09127	69	0.496177409	158.7999279	0.059732741	2897.721858	3019.172856	1520.95596	69	0.503765777	183.1015808	0.060646273	3290.840367	Pos1to6	HPLIVITGPH
256	63	16	1250.00866	627.924042	34	0.502335753	107.6880848	0.086149871	1281.841957	1544.080652	798.533996	34	0.517158217	136.9474505	0.088691902	1583.402921	Pos1to6	HPAIVITGPH
257	63	17	925.5880177	443.6075473	40	0.479271057	70.14051183	0.075779408	884.7519409	1091.376317	532.950048	40	0.488328398	84.26680154	0.077211499	1043.225816	Pos1to6	HPVIVITGPH
258	63	18	230.5591276	228.6391875	39	0.991672678	36.61157097	0.158794715	239.9080751	279.3402221	279.6597057	39	1.001143708	44.78139237	0.160311294	290.6671953	Pos1to6	HPVFVITGPH
259	63	19	-45.1929578	87.50826965	33	-1.936325346	15.23323446	-0.337070977	-72.9818671	-54.97338167	106.6134631	33	-1.939365195	18.55902174	-0.337600147	-88.77622156	Pos1to6	HPVYVITGPH
260	63	20	117.3713114	161.5709377	45	1.376579471	24.08557332	0.205208352	71.65703594	145.2330793	200.6178532	45	1.381350958	29.90634381	0.205919643	88.66708449	Pos1to6	HPVVVITGPH
261	63	21	-76.4388386	35.27489939	54	-0.461478746	4.800305791	-0.062799303	-83.22069204	-87.80067641	41.43803081	54	-0.471955713	5.639001746	-0.064225038	-95.59058177	Pos1to6	HPVMVITGPH
262	63	22	-57.35207381	41.80274343	37	-0.72887937	6.872328686	-0.11982703	-64.53282188	-77.19424851	57.48383666	37	-0.744664762	9.450284533	-0.122422133	-86.85932972	Pos1to6	SCRAMBLED
263	63	23	709.298646	398.8676663	47	0.562340939	58.18082875	0.082025856	602.6044644	853.0217628	488.2758436	47	0.572407253	71.22235177	0.083494179	724.7084502	Pos1to6	HPVIYITGPH
264	63	24	1405.488987	772.9333193	50	0.549939079	109.3092783	0.07777313	1386.036069	1604.443248	894.0834701	50	0.557254656	126.4424969	0.078807709	1582.236668	Pos1to6	HPVIRITGPH
265	63	25	661.4863301	437.1142431	41	0.660806162	68.26577572	0.103200584	659.0579247	789.538895	529.8472551	41	0.671084425	82.74823906	0.104805779	786.6403914	Pos1to6	HPVIKITGPH
266	63	26	419.8865273	279.8230757	69	0.666425469	33.68673968	0.080228199	386.0244553	515.5208367	348.0239004	69	0.675091821	41.89715415	0.081271505	473.9462623	Pos1to6	HPVIIITGPH
267	63	27	88.04067304	116.7556115	81	1.326155371	12.97284572	0.147350597	53.25168184	109.6625791	145.9102041	81	1.330537776	16.2122449	0.147837531	66.32976068	Pos1to6	HPVIQITGPH
268	63	28	666.692043	514.8190257	50	0.772199145	72.80640482	0.10920545	647.9023514	859.8411166	670.4059171	50	0.77968581	94.80971403	0.110264225	835.607815	Pos1to6	HPVILITGPH
269	63	29	71.25630175	173.758203	69	2.438495947	20.9180295	0.293560415	28.22066572	80.75726945	197.000144	69	2.439410661	23.71603039	0.293670533	31.98347163	Pos1to6	HPVISITGPH
270	63	30	510.6416123	258.8274708	59	0.506867174	33.69646655	0.065988485	483.7126187	626.5501121	323.6199869	59	0.516510939	42.13173367	0.067243997	593.5086138	Pos1to6	HPVITITGPH
271	63	31	-68.30823888	48.02210325	34	-0.703020661	8.235722762	-0.120567049	-72.00004965	-83.16068824	59.28831257	34	-0.712936771	10.16786172	-0.122267648	-87.65521963	Pos1to6	HPVIVDTGPH
272	63	32	-5.737510924	63.21588694	33	-11.01799853	11.00447342	-1.917987358	-25.87475571	-6.64258016	73.19071748	33	-11.0184169	12.74086854	-1.918060186	-29.95639419	Pos1to6	HPVIVRTGPH
273	63	33	-77.92359172	37.96977056	26	-0.487269256	7.446484654	-0.095561363	-88.55692348	-98.76655333	49.06589608	26	-0.496786558	9.622613907	-0.09742786	-112.2440831	Pos1to6	HPVIVQTGPH
274	63	34	-84.31410197	39.27982764	38	-0.465874945	6.372029462	-0.075574896	-88.95967	-101.1914918	48.00329736	38	-0.474380765	7.787163116	-0.076954722	-106.7669762	Pos1to6	HPVIVETGPH
275	63	35	701.2418882	564.8028291	37	0.805432246	92.85301312	0.132412246	641.6962671	831.3929887	673.5314292	37	0.810124019	110.7278849	0.133183568	760.7956489	Pos1to6	HPVIVVTGPH
276	63	36	254.9148844	215.3348604	56	0.844732393	28.77533111	0.112882114	203.6270174	301.9617992	256.8105577	56	0.850473664	34.31775429	0.113649324	241.2082789	Pos1to6	HPVIVLTGPH
277	63	37	-55.90338477	41.91214505	46	-0.74972464	6.179608652	-0.110540868	-61.70128236	-70.0462341	52.93743768	46	-0.755749947	7.805199366	-0.11142925	-77.31092645	Pos1to6	HPVIVHTGPH
278	63	38	-69.89655492	56.36728122	36	-0.806438619	9.39454687	-0.134406437	-84.20373825	-85.65232492	69.56849265	36	-0.812219548	11.59474877	-0.135369925	-103.1845698	Pos1to6	HPVIVSTGPH
279	63	39	333.6488655	225.2879824	15	0.675224782	58.16910692	0.174342289	306.4062872	378.9560654	258.1309626	15	0.681163296	66.64912795	0.175875607	348.0141341	Pos1to6	HPVIFITGPH
280	63	40	43.82248138	92.29415179	52	2.106091414	12.79889603	0.29206233	20.85277809	51.3848559	108.3113951	52	2.107846626	15.02008803	0.292305734	24.45130818	Pos1to6	HPVIVKTGPH
281	63	41	91.29489441	165.0719721	46	1.808118331	24.33853448	0.266592504	65.43225285	111.5125684	201.9136597	46	1.810680739	29.77054496	0.26697031	79.92252596	Pos1to6	HPVIVIEGPH
282	63	42	289.1554609	242.1579968	38	0.837466448	39.28321438	0.135854997	273.5907177	333.0653894	280.8516934	38	0.843232898	45.56016083	0.136790439	315.1370499	Pos1to6	HPVIVIHGPH
283	63	43	-41.77410044	67.81328284	45	-1.623333169	10.10900735	-0.241992221	-52.08747504	-47.66957216	77.46280571	45	-1.624994775	11.54747329	-0.242239919	-59.43844689	Pos1to6	HPVIVIDGPH
284	63	44	0.625183166	90.4263018	31	144.6396939	16.24104325	25.97805592	-2.983404584	1.006629539	145.5986682	31	144.6397732	26.15029277	25.97807015	-4.803685293	Pos1to6	HPVIVIQGPH
285	63	45	301.7215244	194.7982993	33	0.645622813	33.91003133	0.112388506	277.7196834	328.5292164	213.4352647	33	0.649669053	37.15431058	0.113092866	302.3948329	Pos1to6	HPVIVISGPH
286	63	46	301.377833	476.122591	41	1.579819545	74.35785616	0.246726361	269.7764798	367.2604797	581.0447054	41	1.582105175	90.74393746	0.247083317	328.7509184	Pos1to6	HPVIVIRGPH
287	63	47	-11.16403106	47.97374293	27	-4.297170322	9.232551132	-0.826990814	-14.67601454	-12.33940184	53.03063102	27	-4.297666266	10.2057497	-0.827086258	-16.22113374	Pos1to6	HPVIVIFGPH
288	63	48	252.6519123	226.1047341	12	0.894925877	65.27081456	0.258342848	205.7795806	342.3875688	311.3554085	12	0.9093654	89.88056445	0.262511179	278.8673542	Pos1to6	HPVIVIKGPH
