# Supplementary material for: Quantitative mapping of protein-peptide affinity landscapes using spectrally encoded beads
Source: eLife journal article supplement (doi:10.7554/elife.40499), 2019-07-08
Supplement: supp [file elife-40499-supp-v1.zip › elife_poa_e40499_Figure_3_source_data_2.csv]

	conc	code	AVG	SD	N	CV	SEM	RSEM	MED	AVG_NORM	SD_NORM	N_NORM	CV_NORM	SEM_NORM	RSEM_NORM	MED_NORM	library	sequence
1	1000	1	4244.391778	2021.232764	18	0.476212581	476.4091312	0.112244382	3770.936876	4733.079419	2289.381434	18	0.483698081	539.6123788	0.114008731	4205.112217	Flank	HPVIVITGPH
2	1000	2	492.7852489	292.0965002	43	0.592746031	44.54429869	0.090392922	502.0232487	600.8597576	362.1768631	43	0.602764386	55.23145382	0.091920707	612.1237765	Flank	SCRAMBLED
3	1000	3	3170.2514	2294.897394	61	0.723884987	293.8315021	0.092683975	2696.761723	3886.543773	2877.142951	61	0.740283171	368.3804065	0.094783548	3306.072976	Flank	FPVIVITGPH
4	1000	4	7720.735247	1622.55077	31	0.210154955	291.418721	0.037744944	7776.267932	8455.75265	1828.320395	31	0.216222076	328.3760368	0.038834631	8516.572071	Flank	YPVIVITGPH
5	1000	5	12822.79432	8161.705776	38	0.636499781	1324.00351	0.103253899	14349.27	15264.1962	9855.528332	38	0.645663106	1598.777812	0.104740387	17081.30592	Flank	IPVIVITGPH
6	1000	6	12533.44679	6031.279476	30	0.481214751	1101.15594	0.087857391	13343.04556	14792.11873	7397.398928	30	0.500090559	1350.574087	0.091303627	15747.61655	Flank	VPVIVITGPH
7	1000	7	7235.12102	3303.522286	46	0.456595305	487.0777881	0.067321305	8030.216787	8201.496757	3868.405295	46	0.471670649	570.3652438	0.069544043	9102.791337	Flank	TPVIVITGPH
8	1000	8	2883.821068	1585.578798	32	0.549818716	280.29338	0.097195136	2541.224978	3409.871649	1926.614709	32	0.565010917	340.5805814	0.099880763	3004.781089	Flank	QPVIVITGPH
9	1000	9	4892.432478	2080.306982	40	0.425209135	328.9254147	0.067231467	4163.994793	5799.692195	2557.940975	40	0.441047712	404.44598	0.069735766	4936.171978	Flank	APVIVITGPH
10	1000	10	3458.544442	3432.501627	46	0.992470007	506.0947544	0.146331719	2908.331957	4357.678484	4359.143028	46	1.000336083	642.7205752	0.147491509	3664.424676	Flank	GPVIVITGPH
11	1000	11	5646.285225	3361.080489	32	0.595272884	594.1607015	0.105230373	4813.090731	7028.010938	4345.33118	32	0.618287481	768.1532859	0.109298818	5990.921987	Flank	NPVIVITGPH
12	1000	12	828.6829521	417.3287348	52	0.503604827	57.87308278	0.069837424	714.8966718	929.6112884	471.3241061	52	0.50701203	65.36089353	0.070309918	801.9665598	Flank	EPVIVITGPH
13	1000	13	4161.315378	3359.205694	69	0.80724612	404.4008432	0.097181013	3428.730643	5079.188122	4162.411317	69	0.819503278	501.0954373	0.098656601	4185.015162	Flank	RPVIVITGPH
14	1000	14	1837.283157	1706.41658	50	0.928771688	241.323747	0.131348152	1460.03987	2161.898067	2038.683576	50	0.943006337	288.3133963	0.133361235	1718.002672	Flank	HPVIVITMPH
15	1000	15	3338.25343	1832.62697	61	0.548977784	234.6438394	0.070289403	3201.593454	4374.336806	2485.643494	61	0.568233221	318.2540376	0.072754809	4195.262095	Flank	HPVIVITHPH
16	1000	16	2996.596734	1624.511218	51	0.542118731	227.4770705	0.075911806	2717.748501	3686.317267	2042.919375	51	0.554189785	286.0659314	0.077602092	3343.287107	Flank	HPVIVITSPH
17	1000	17	2780.897657	1155.573201	75	0.415539636	133.4340997	0.047982384	2771.624395	3345.445174	1432.704981	75	0.428255406	165.4345213	0.049450675	3334.289356	Flank	HPVIVITTPH
18	1000	18	6154.5659	2514.011443	41	0.408479084	392.6226244	0.063793715	5978.225125	7494.262283	3171.690192	41	0.423215798	495.3347889	0.066095203	7279.536494	Flank	HPVIVITAPH
19	1000	19	1596.829418	1308.601954	42	0.819500154	201.9216653	0.126451619	1382.339288	2139.70786	1784.413783	42	0.833952062	275.3410244	0.128681597	1852.296936	Flank	HPVIVITDPH
20	1000	20	1269.187349	673.5310399	35	0.530678974	113.8475248	0.089701119	1289.346531	1387.974877	749.5265535	35	0.540014496	126.6931112	0.09127911	1410.020825	Flank	HPVIVITNPH
21	1000	21	6839.306996	4280.39264	47	0.625851807	624.3594361	0.091289868	8152.727967	7868.117787	4963.543016	47	0.63084249	724.0071599	0.092017834	9379.111651	Flank	HPVIVITKPH
22	1000	22	712.3065919	604.3542397	22	0.848446788	128.8487568	0.180889463	556.6761753	786.1528268	671.9697705	22	0.854757176	143.2644364	0.182234842	614.3878966	Flank	SCRAMBLED
23	1000	23	4247.90048	1911.952584	55	0.450093544	257.8076338	0.060690601	4379.521607	4834.731457	2240.825292	55	0.463484955	302.1528207	0.062496299	4984.535532	Flank	HPVIVITEPH
24	1000	24	783.1730023	509.5168465	37	0.650580197	83.76405358	0.106954726	872.4329186	878.0765762	574.8417197	37	0.654660123	94.50339658	0.107625461	978.1528576	Flank	HPVIVITGFH
25	1000	25	616.509524	421.2080931	27	0.683214252	81.06153531	0.131484644	565.0790468	727.51046	522.2379409	27	0.717842519	100.5047386	0.138148857	666.8200592	Flank	HPVIVITGDH
26	1000	26	1432.086906	1121.809542	58	0.783339012	147.3008093	0.102857451	1172.31275	1837.759031	1456.448551	58	0.792513342	191.2410639	0.1040621	1504.397766	Flank	HPVIVITGYH
27	1000	27	1039.019313	508.7302122	42	0.489625367	78.49877597	0.075550834	1101.801636	1172.845271	581.5723319	42	0.495864498	89.73855906	0.076513553	1243.713973	Flank	HPVIVITGIH
28	1000	28	2477.173058	999.6145688	58	0.403530373	131.2558233	0.052986134	2645.234397	2832.097839	1160.080839	58	0.409618913	152.3260768	0.053785598	3024.238696	Flank	HPVIVITGVH
29	1000	29	1200.685107	488.2694289	45	0.40665902	72.78690895	0.060621147	1100.831747	1426.393086	593.2220283	45	0.415889585	88.43231874	0.061997159	1307.769027	Flank	HPVIVITGLH
30	1000	30	919.0436585	386.4477218	57	0.420488971	51.18625119	0.055695125	848.1669331	1076.680354	466.50469	57	0.433280582	61.79005567	0.057389415	993.6466728	Flank	HPVIVITGEH
31	1000	31	1199.585854	826.6142266	28	0.689083006	156.2154053	0.130224448	1297.161863	1361.090896	948.1924273	28	0.696641517	179.1915256	0.131652872	1471.803953	Flank	HPVIVITGSH
32	1000	32	762.404008	700.6963147	50	0.919061688	99.09342313	0.12997495	486.2244169	886.3066492	822.1829035	50	0.92765061	116.2742213	0.131189607	565.2435313	Flank	HPVIVITGTH
33	1000	33	1651.474371	577.6760914	29	0.349794161	107.2717571	0.064955145	1647.159571	1905.718809	679.1430488	29	0.356371069	126.1136981	0.066176446	1900.739746	Flank	HPVIVITGRH
34	1000	34	2708.550816	1420.200653	65	0.524339675	176.1542111	0.065036332	2657.030919	3827.814751	2128.057182	65	0.555945708	263.9530078	0.068956578	3755.005108	Flank	HPVIVITGAH
35	1000	35	6907.166411	3650.103988	40	0.528451723	577.1321149	0.083555554	6049.569684	8260.499476	4482.460528	40	0.542637953	708.7392396	0.085798594	7234.872339	Flank	HPVIVITGPP
36	1000	36	5061.677255	2955.022318	42	0.58380299	455.9698428	0.090082757	5384.013046	6142.454853	3649.010509	42	0.594063871	563.0545455	0.091666045	6533.616309	Flank	HPVIVITGPT
37	1000	37	2837.406027	2005.461632	58	0.706794027	263.3300132	0.092806602	2223.917541	3369.552138	2407.960695	58	0.714623367	316.1807293	0.093834645	2641.005917	Flank	HPVIVITGPF
38	1000	38	8341.502875	5907.840429	24	0.708246526	1205.932878	0.144570217	7680.748674	10386.34788	7534.46902	24	0.725420437	1537.967048	0.148075827	9563.615681	Flank	HPVIVITGPD
39	1000	39	5656.478422	3434.097185	48	0.607108686	495.6692335	0.087628591	6260.319157	6743.004417	4148.102015	48	0.615171185	598.7269538	0.088792312	7462.834042	Flank	HPVIVITGPA
40	1000	40	8213.535233	2794.56736	29	0.340239286	518.938131	0.063180849	8551.019322	10257.33679	3608.426499	29	0.351789804	670.0679789	0.065325727	10678.79818	Flank	HPVIVITGPG
41	1000	41	5911.416657	3111.357066	28	0.526330192	587.9912168	0.099467057	6860.828376	6650.529189	3545.24069	28	0.53307648	669.9875146	0.100741985	7718.647157	Flank	HPVIVITGPI
42	1000	42	8681.293528	4268.2184	49	0.491656962	609.7454857	0.070236709	8669.994128	10357.55959	5206.183234	49	0.502645743	743.7404619	0.071806535	10344.0784	Flank	HPVIVITGPQ
43	1000	43	5394.55717	4208.910611	42	0.780214293	649.4490069	0.120389679	6491.224815	5749.663791	4494.448667	42	0.781688953	693.5084855	0.120617224	6918.521595	Flank	HPVIVITGPS
44	1000	44	4191.898106	2851.565282	46	0.680256345	420.4403633	0.100298326	4755.948293	5049.995601	3506.828928	46	0.694422175	517.0537171	0.102386964	5729.509008	Flank	HPVIVITGPV
45	1000	45	2628.190683	1988.135763	41	0.75646557	310.4946413	0.118140074	2147.187119	2958.076492	2250.567613	41	0.760821304	351.4796105	0.118820325	2416.698219	Flank	HPVIVITGPY
46	1000	46	2334.772116	1477.755253	37	0.632933399	242.941467	0.10405361	2167.000563	2581.252973	1652.181542	37	0.640069594	271.6169724	0.105226793	2395.76985	Flank	HPVIVITQPH
47	1000	47	37240.57949	17699.89268	67	0.475285104	2162.386054	0.058065317	43893.43579	47262.51815	23447.09785	67	0.49610344	2864.518916	0.060608682	55705.74717	Flank	HPVIVITGPT(PO4)
48	1000	48	30648.01472	11874.85165	51	0.387459082	1662.811826	0.054255124	34804.22984	37045.05899	14896.95299	51	0.402130632	2085.990659	0.056309552	42068.78518	Flank	HPVIVITGPS(PO4)
49	125	1	358.5777919	283.5074149	23	0.790644098	59.11538249	0.164860691	293.8134534	399.8634565	317.9614795	23	0.795175139	66.29955159	0.165805478	327.6423296	Flank	HPVIVITGPH
50	125	2	42.03829061	175.4332347	47	4.173177171	25.58956728	0.608720453	-10.00758166	51.25785962	213.9816721	47	4.174611928	31.21243479	0.608929733	-12.20238046	Flank	SCRAMBLED
51	125	3	271.183831	220.9394489	30	0.814722058	40.33784	0.148747216	190.9439467	332.4555995	275.7140959	30	0.82932607	50.33827658	0.151413532	234.0861697	Flank	FPVIVITGPH
52	125	4	944.2997335	495.3779551	67	0.524598216	60.52004953	0.064089873	1030.759037	1034.197485	545.0820909	67	0.527058032	66.59237617	0.064390387	1128.887753	Flank	YPVIVITGPH
53	125	5	2290.825353	1488.711534	29	0.649858154	276.4467918	0.12067563	2251.313107	2726.98811	1796.637153	29	0.658835712	333.6271438	0.12234272	2679.952911	Flank	IPVIVITGPH
54	125	6	2318.153625	1391.005955	37	0.600049082	228.6799704	0.098647461	2410.064771	2735.911696	1683.379214	37	0.615290039	276.745838	0.101153059	2844.386292	Flank	VPVIVITGPH
55	125	7	872.7843947	391.4862733	47	0.448548663	57.10414193	0.065427547	871.1254378	989.3598689	458.9497768	47	0.46388558	66.94470529	0.067664666	987.4793294	Flank	TPVIVITGPH
56	125	8	178.1123522	164.9118107	49	0.925886434	23.5588301	0.132269491	144.5704993	210.6026157	196.910901	49	0.934987917	28.13012871	0.133569702	170.9422448	Flank	QPVIVITGPH
57	125	9	449.4787287	289.7664137	57	0.64467214	38.38049909	0.085388911	423.4865147	532.8307108	349.1250771	57	0.655227017	46.24274613	0.086786938	502.0184633	Flank	APVIVITGPH
58	125	10	324.9981614	284.0744085	60	0.874080048	36.67384844	0.112843249	226.5307153	409.4894598	361.5797716	60	0.883001413	46.6797478	0.113994992	285.4229693	Flank	GPVIVITGPH
59	125	11	638.2592441	451.6634325	36	0.707648869	75.27723875	0.117941478	547.5213659	794.4502925	577.6568895	36	0.727115208	96.27614826	0.121185868	681.5075744	Flank	NPVIVITGPH
60	125	12	62.39950369	362.0565021	59	5.802233683	47.13574172	0.755386484	9.49893188	69.99936813	406.1734618	59	5.802530404	52.87928066	0.755425114	10.65584164	Flank	EPVIVITGPH
61	125	13	306.566994	304.5355516	64	0.993373578	38.06694395	0.124171697	243.5928547	374.1873165	375.444418	64	1.003359551	46.93055225	0.125419944	297.3227986	Flank	RPVIVITGPH
62	125	14	148.7816392	174.1605286	76	1.1705781	19.97758274	0.134274517	108.0283548	175.0686806	206.9143832	76	1.181904053	23.73470754	0.135573693	127.1150233	Flank	HPVIVITMPH
63	125	15	319.4478443	262.2806797	64	0.821043824	32.78508496	0.102630478	307.5755274	418.5938821	349.1247003	64	0.834041574	43.64058754	0.104255197	403.036791	Flank	HPVIVITHPH
64	125	16	349.2856538	275.9130185	56	0.789935159	36.87042799	0.105559526	346.9852071	429.6800173	342.9996346	56	0.798267596	45.83525416	0.106672995	426.8500815	Flank	HPVIVITSPH
65	125	17	274.7639726	210.5019879	64	0.76611932	26.31274849	0.095764915	236.1078827	330.5435581	255.5399553	64	0.773090109	31.94249441	0.096636264	284.0399304	Flank	HPVIVITTPH
66	125	18	619.4826925	438.9211097	41	0.708528446	68.54796088	0.110653553	621.3983186	754.3287135	540.9483695	41	0.717125518	84.48194186	0.11199619	756.6613239	Flank	HPVIVITAPH
67	125	19	197.9063599	128.8866546	31	0.651250696	23.14872652	0.116968078	187.879562	265.1891236	177.5030692	31	0.669345208	31.88049235	0.120217948	251.7534879	Flank	HPVIVITDPH
68	125	20	128.5787856	115.42989	48	0.897736664	16.66086951	0.129577126	101.1760775	140.6129082	127.0137494	48	0.903286555	18.3328556	0.130378184	110.6454881	Flank	HPVIVITNPH
69	125	21	1028.881982	532.4171529	37	0.517471549	87.52884077	0.085071799	1050.202261	1183.652763	619.638058	37	0.523496483	101.8678692	0.086062292	1208.180171	Flank	HPVIVITKPH
70	125	22	24.34596867	113.4270286	16	4.65896552	28.35675715	1.16474138	-0.996610372	26.86996345	125.2172229	16	4.660118839	31.30430572	1.16502971	-1.099930943	Flank	SCRAMBLED
71	125	23	515.9508201	375.243536	59	0.727285473	48.85254731	0.094684504	413.6074085	587.2274249	431.9927938	59	0.735648193	56.24067137	0.095773237	470.7456678	Flank	HPVIVITEPH
72	125	24	82.60871479	118.7446125	40	1.43743445	18.77517176	0.227278342	62.81724497	92.61909851	133.3053361	40	1.439285615	21.07742432	0.227571037	70.429332	Flank	HPVIVITGFH
73	125	25	-5.337045881	92.26425176	33	-17.28751332	16.06114468	-3.009369796	-24.21403098	-6.297967109	108.8850273	33	-17.28891648	18.95445033	-3.009614054	-28.57370427	Flank	HPVIVITGDH
74	125	26	84.54735921	112.9596794	59	1.336052131	14.70609765	0.173939172	60.05453003	108.497377	145.5439917	59	1.341451708	18.94821377	0.174642137	77.06638082	Flank	HPVIVITGYH
75	125	27	124.7695313	98.68455834	27	0.790934752	18.99185211	0.152215464	108.0336421	140.8398794	111.94125	27	0.794812169	21.54310361	0.152961673	121.9484034	Flank	HPVIVITGIH
76	125	28	227.8175783	160.835175	50	0.705982287	22.74552859	0.099840973	202.1346514	260.4588602	184.7903543	50	0.709480008	26.13330252	0.100335625	231.096131	Flank	HPVIVITGVH
77	125	29	81.75421474	96.11518423	65	1.175660295	11.92162137	0.145822713	70.55669975	97.12258945	114.4963587	65	1.178884947	14.20152546	0.146222681	83.82013581	Flank	HPVIVITGLH
78	125	30	26.05720213	64.44345165	36	2.473153155	10.74057527	0.412192192	24.43489752	30.5265994	75.5643261	36	2.475360098	12.59405435	0.412560016	28.62603301	Flank	HPVIVITGEH
79	125	31	79.83516865	161.524538	45	2.023225362	24.07865647	0.30160463	49.9663441	90.58369675	183.5055538	45	2.025812153	27.35539283	0.301990246	56.69351287	Flank	HPVIVITGSH
80	125	32	27.9327041	77.89676428	41	2.788729799	12.16543072	0.435526424	25.60575788	32.4722078	90.64851145	41	2.791572166	14.15691904	0.435970327	29.76709622	Flank	HPVIVITGTH
81	125	33	160.1486013	93.0952045	31	0.581305136	16.72039232	0.104405485	151.5114809	184.8034745	108.1629406	31	0.585286293	19.42663761	0.105120521	174.8366696	Flank	HPVIVITGRH
82	125	34	188.3827816	139.8627766	57	0.742439279	18.52527731	0.098338485	178.9976814	266.228858	203.6884995	57	0.765087981	26.97920083	0.101338379	252.9655199	Flank	HPVIVITGAH
83	125	35	642.6497929	514.9263847	29	0.801255039	95.61942914	0.148789325	437.1261987	768.5652788	623.0615903	29	0.810681418	115.6996327	0.15053976	522.7730912	Flank	HPVIVITGPP
84	125	36	595.1634287	272.4506773	38	0.457774561	44.19733606	0.07426084	566.7691969	722.2436965	340.0253217	38	0.470790293	55.1593909	0.07637227	687.7866819	Flank	HPVIVITGPT
85	125	37	112.6871459	145.2061189	75	1.288577483	16.76695837	0.148792111	83.28554439	133.8212472	173.0159525	75	1.292888507	19.97816135	0.149289905	98.90547264	Flank	HPVIVITGPF
86	125	38	280.5156615	409.0175666	18	1.458091732	96.40636499	0.343675517	26.83195428	349.2815731	512.2251087	18	1.466510541	120.732616	0.345659849	33.40956847	Flank	HPVIVITGPD
87	125	39	531.5176495	376.299176	52	0.707971177	52.1833067	0.098177938	502.6663333	633.6143428	452.9690356	52	0.714897067	62.81550323	0.099138386	599.2211147	Flank	HPVIVITGPA
88	125	40	1360.723641	752.3949633	24	0.552937379	153.5819788	0.11286787	1212.185941	1699.317074	951.8193942	24	0.560118773	194.2893203	0.114333766	1513.81824	Flank	HPVIVITGPG
89	125	41	610.7285665	378.743564	50	0.620150399	53.56242848	0.08770251	622.9617506	687.0887968	430.0394201	50	0.625886235	60.81675803	0.08851368	700.8515126	Flank	HPVIVITGPI
90	125	42	839.8315601	620.8736072	40	0.739283491	98.16873689	0.116890983	895.8116694	1001.994162	748.125542	40	0.746636628	118.2890344	0.118053616	1068.783439	Flank	HPVIVITGPQ
91	125	43	477.3816732	535.5459035	57	1.121840099	70.93478778	0.148591351	442.5379732	508.8061975	571.3212768	57	1.122866191	75.67335175	0.14872726	471.668847	Flank	HPVIVITGPS
92	125	44	367.3261785	335.4788823	49	0.913299683	47.92555462	0.130471383	366.1136221	442.5192451	408.8431866	49	0.923899223	58.40616951	0.131985603	441.0584739	Flank	HPVIVITGPV
93	125	45	176.650512	178.2040472	47	1.008794399	25.99373183	0.147147786	175.6221671	198.8233694	201.2221216	47	1.01206474	29.35126306	0.147624815	197.6659485	Flank	HPVIVITGPY
94	125	46	187.6695604	159.7448832	44	0.851202949	24.08244727	0.128323673	162.1986774	207.4817526	177.7127972	44	0.856522537	26.79121222	0.129125631	179.3219199	Flank	HPVIVITQPH
95	125	47	16901.09256	8894.109272	56	0.526244634	1188.525345	0.070322397	19237.8603	21449.40291	11692.5043	56	0.54512027	1562.476611	0.07284476	24415.02614	Flank	HPVIVITGPT(PO4)
96	125	48	8991.297789	4756.303534	52	0.528989657	659.5806259	0.073357667	10818.81837	10868.01739	5866.86304	52	0.539828271	813.5875199	0.074860712	13076.98943	Flank	HPVIVITGPS(PO4)
97	2000	1	6093.881026	4592.243225	15	0.753582685	1185.712102	0.194574213	4822.891825	6795.513793	5153.277306	15	0.758335199	1330.570479	0.195801306	5378.186377	Flank	HPVIVITGPH
98	2000	2	855.6248441	567.8953754	51	0.663720063	79.5212584	0.092939399	802.1166709	1043.275012	701.7925523	51	0.672682221	98.27061341	0.094194352	978.0317685	Flank	SCRAMBLED
99	2000	3	4350.256035	3404.704462	34	0.782644615	583.901998	0.134222444	3632.322672	5333.160804	4254.987718	34	0.797836007	729.7243734	0.136827746	4453.016269	Flank	FPVIVITGPH
100	2000	4	11530.95363	3746.862498	60	0.324939516	483.7178685	0.041949511	12206.82493	12628.70551	4153.530567	60	0.328895987	536.2184904	0.042460289	13368.92005	Flank	YPVIVITGPH
101	2000	5	16445.8591	9221.120944	38	0.560695607	1495.863344	0.090956838	18827.26655	19577.07608	11180.00929	38	0.571076561	1813.636995	0.092640851	22411.8927	Flank	IPVIVITGPH
102	2000	6	16713.02596	9106.677962	33	0.544885049	1585.269153	0.094852312	17944.64103	19724.90636	11078.00065	33	0.561625006	1928.432386	0.097766365	21178.4727	Flank	VPVIVITGPH
103	2000	7	11338.7345	4912.108243	56	0.433214857	656.4080747	0.05789077	12048.47572	12853.2189	5772.069081	56	0.449075763	771.3251755	0.060010273	13657.75835	Flank	TPVIVITGPH
104	2000	8	4236.354569	2429.707023	45	0.57353722	362.1993379	0.085497881	3766.215829	5009.12678	2945.952841	45	0.588117045	439.1567207	0.087671313	4453.227949	Flank	QPVIVITGPH
105	2000	9	6851.00721	3628.188454	47	0.529584679	529.2256779	0.077247865	6043.487473	8121.467845	4404.952753	47	0.54238382	642.5283959	0.079114811	7164.200486	Flank	APVIVITGPH
106	2000	10	5102.809142	2434.01624	61	0.476995351	311.643845	0.061072997	4858.064858	6429.4104	3170.68465	61	0.493153252	405.9645698	0.063141804	6121.038795	Flank	GPVIVITGPH
107	2000	11	10345.5934	6632.926959	22	0.641135477	1414.144779	0.136690543	8334.756091	12877.30617	8531.973878	22	0.662558905	1819.022943	0.141258033	10374.38858	Flank	NPVIVITGPH
108	2000	12	1128.375321	504.6823203	53	0.447264585	69.32344813	0.061436516	1075.434972	1265.804291	571.0011946	53	0.451097534	78.43304611	0.061963012	1206.416143	Flank	EPVIVITGPH
109	2000	13	7488.642703	4666.188321	60	0.62310201	602.4023219	0.080442124	6696.484186	9140.433159	5839.838692	60	0.638901745	753.9199332	0.082481861	8173.546066	Flank	RPVIVITGPH
110	2000	14	3270.005133	3261.345716	63	0.997351865	410.8909383	0.125654524	2674.676273	3847.756263	3888.623355	63	1.010621019	489.9204924	0.12732628	3147.243494	Flank	HPVIVITMPH
111	2000	15	5865.204827	3535.429851	48	0.602780287	510.2953441	0.08700384	6344.746521	7685.570279	4767.881899	48	0.620368005	688.1844745	0.089542409	8313.945843	Flank	HPVIVITHPH
112	2000	16	5802.449136	2768.059663	51	0.477050224	387.6058817	0.066800393	5766.95979	7137.986968	3502.784952	51	0.490724481	490.4880007	0.068715172	7094.329112	Flank	HPVIVITSPH
113	2000	17	5833.484386	2227.029906	57	0.38176667	294.9773171	0.050566231	5468.596817	7017.734774	2776.002405	57	0.395569581	367.6905008	0.052394471	6578.771709	Flank	HPVIVITTPH
114	2000	18	9582.682999	7331.378511	43	0.765065328	1118.024742	0.116671369	10930.19035	11668.59547	9020.219824	43	0.773033897	1375.570627	0.117886564	13309.42176	Flank	HPVIVITAPH
115	2000	19	1723.16091	1163.836792	29	0.675408075	216.1190668	0.125420131	1650.044071	2308.988613	1599.833556	29	0.692871999	297.0816331	0.1286631	2211.014044	Flank	HPVIVITDPH
116	2000	20	2981.029573	1493.039366	46	0.500846882	220.1366447	0.073845844	2709.405852	3260.034195	1664.990716	46	0.510727991	245.4894881	0.075302734	2962.988293	Flank	HPVIVITNPH
117	2000	21	11807.83039	6195.885022	47	0.524726797	903.762716	0.07653927	13716.11724	13584.03715	7208.632367	47	0.530669365	1051.487099	0.077406082	15779.38029	Flank	HPVIVITKPH
118	2000	22	837.0314724	450.3433369	12	0.538024378	130.0029234	0.15531426	629.8860237	923.8081825	506.1744832	12	0.547921628	146.1199871	0.15817135	695.187555	Flank	SCRAMBLED
119	2000	23	7937.643278	4069.074232	74	0.51263002	473.0202713	0.059592029	8465.130609	9034.197912	4737.776996	74	0.524426965	550.7553887	0.060963396	9634.555572	Flank	HPVIVITEPH
120	2000	24	1244.480024	636.2395668	48	0.511249321	91.8332713	0.073792483	1321.020546	1395.283999	720.5681457	48	0.516431168	104.0050532	0.074540419	1481.099572	Flank	HPVIVITGFH
121	2000	25	1182.532581	1323.400588	25	1.119123996	264.6801175	0.223824799	881.081019	1395.444496	1591.635628	25	1.140594006	318.3271256	0.228118801	1039.717364	Flank	HPVIVITGDH
122	2000	26	1860.083273	1171.891907	51	0.630021206	164.0976899	0.088220615	1511.335349	2386.995383	1531.00051	51	0.641392322	214.3829523	0.089812889	1939.456449	Flank	HPVIVITGYH
123	2000	27	2218.782225	757.4836288	33	0.341396114	131.8609745	0.059429435	2046.250508	2504.561954	877.3116495	33	0.350285465	152.7203555	0.060976873	2309.808107	Flank	HPVIVITGIH
124	2000	28	4635.589558	1627.720956	63	0.351135694	205.0735644	0.044238939	4726.197807	5299.768268	1897.932538	63	0.358116137	239.1170239	0.045118392	5403.358701	Flank	HPVIVITGVH
125	2000	29	1627.764411	746.8912024	64	0.458844779	93.3614003	0.057355597	1554.117399	1933.755894	903.1512034	64	0.467045094	112.8939004	0.058380637	1846.264521	Flank	HPVIVITGLH
126	2000	30	1438.450719	651.7375858	40	0.453083013	103.0487604	0.071638715	1411.212112	1685.177428	783.5718154	40	0.464978822	123.8935823	0.073519607	1653.266786	Flank	HPVIVITGEH
127	2000	31	2493.316069	1808.047106	27	0.725157604	347.9588277	0.139556646	2358.538964	2829.001184	2071.801716	27	0.732343884	398.7184261	0.140939646	2676.078498	Flank	HPVIVITGSH
128	2000	32	1681.684409	1163.354231	40	0.691779162	183.9424548	0.10937989	1529.442057	1954.984572	1374.647059	40	0.703149825	217.3507843	0.111177749	1778.000444	Flank	HPVIVITGTH
129	2000	33	2903.609829	845.6790977	22	0.291250942	180.2993894	0.062094909	2683.082012	3350.62049	1002.230435	22	0.299117861	213.6762468	0.063772142	3096.142421	Flank	HPVIVITGRH
130	2000	34	5521.560354	2628.213189	57	0.475991028	348.1153411	0.063046552	5894.361882	7803.25407	3984.331096	57	0.510598663	527.7375458	0.067630445	8330.109678	Flank	HPVIVITGAH
131	2000	35	10945.82845	6090.747969	60	0.556444676	786.3121816	0.071836699	11053.76012	13090.46356	7460.70759	60	0.56993456	963.1732083	0.073578235	13219.54247	Flank	HPVIVITGPP
132	2000	36	11353.63768	3661.156399	39	0.322465496	586.254215	0.051635804	11272.00431	13777.88494	4693.993106	39	0.340690398	751.64045	0.054554124	13678.82109	Flank	HPVIVITGPT
133	2000	37	4460.170618	2378.976165	67	0.533382323	290.6381963	0.065163022	3997.208108	5296.660859	2879.871335	67	0.543714505	351.8322808	0.066425299	4746.871262	Flank	HPVIVITGPF
134	2000	38	9292.467811	7136.770869	16	0.768016744	1784.192717	0.192004186	9211.295367	11570.43338	9069.857403	16	0.783882254	2267.464351	0.195970564	11469.36224	Flank	HPVIVITGPD
135	2000	39	10356.74683	6090.642266	67	0.588084499	744.0903814	0.071845956	11215.28936	12346.12499	7363.281182	67	0.596404231	899.5679706	0.072862374	13369.58087	Flank	HPVIVITGPA
136	2000	40	12869.682	6353.952599	32	0.49371481	1123.230743	0.087277272	15082.76311	16072.08819	8064.082891	32	0.501744565	1425.541924	0.088696746	18835.8577	Flank	HPVIVITGPG
137	2000	41	10037.13588	5853.645592	48	0.583198799	844.9009645	0.084177496	11819.07464	11292.09275	6654.367131	48	0.58929441	960.4751635	0.085057322	13296.82975	Flank	HPVIVITGPI
138	2000	42	13728.31696	7038.482711	41	0.51269815	1099.226323	0.080069999	15899.86958	16379.10992	8570.291097	41	0.523245227	1338.454601	0.081717176	18969.96642	Flank	HPVIVITGPQ
139	2000	43	7218.658955	7144.530686	37	0.989731019	1174.55361	0.162710777	5036.487063	7693.840422	7623.779715	37	0.990893923	1253.341665	0.162901957	5368.023062	Flank	HPVIVITGPS
140	2000	44	8916.821809	4585.726298	35	0.514278113	775.1292183	0.086928867	10942.48172	10742.12917	5724.208804	35	0.532874695	967.5678852	0.090072263	13182.44937	Flank	HPVIVITGPV
141	2000	45	4479.556454	3089.319702	43	0.68964857	471.1168379	0.105170421	3941.869772	5041.822395	3501.160135	43	0.694423536	533.9219151	0.105898596	4436.646239	Flank	HPVIVITGPY
142	2000	46	3080.89589	3129.124301	52	1.015654022	433.9314659	0.140845871	1468.902742	3406.144701	3474.664103	52	1.02011641	481.849215	0.141464693	1623.974152	Flank	HPVIVITQPH
143	2000	47	33734.59258	25221.79371	54	0.747653722	3432.251388	0.101742785	45261.57859	42813.02321	32583.17983	54	0.761057673	4434.009155	0.103566831	57442.07552	Flank	HPVIVITGPT(PO4)
144	2000	48	33275.07607	17826.51163	60	0.535731657	2301.392756	0.069162659	38783.28369	40220.45692	21977.92809	60	0.546436559	2837.338316	0.070544656	46878.3719	Flank	HPVIVITGPS(PO4)
145	250	1	1920.166514	3766.704525	22	1.961655147	803.0641031	0.418226283	872.3391905	2141.249226	4204.312363	22	1.96348576	896.3624075	0.41861657	972.7779351	Flank	HPVIVITGPH
146	250	2	103.9496937	165.0760847	37	1.588038202	27.13834115	0.261071872	96.91831479	126.7472756	201.7569161	37	1.591804756	33.16863269	0.26169109	118.1738197	Flank	SCRAMBLED
147	250	3	697.7627622	582.9212222	51	0.835414634	81.62529781	0.116981447	577.7466127	855.4165509	726.8158411	51	0.849663056	101.7745747	0.118976626	708.2837341	Flank	FPVIVITGPH
148	250	4	2085.015746	963.0098959	47	0.461871762	140.4694303	0.067370921	2175.212392	2283.510166	1061.064409	47	0.464663755	154.7721509	0.067778175	2382.293572	Flank	YPVIVITGPH
149	250	5	5059.806303	2599.406539	30	0.513736373	474.5845326	0.093795	5078.682364	6023.170473	3162.445205	30	0.525046605	577.3808586	0.095859956	6045.64045	Flank	IPVIVITGPH
150	250	6	5067.765008	1661.171663	28	0.32779177	313.9319361	0.061946822	4861.364004	5981.034824	2122.807156	28	0.354923056	401.1728439	0.067074153	5737.437974	Flank	VPVIVITGPH
151	250	7	1999.764557	1201.030198	41	0.600585801	187.5694042	0.093795744	1824.718894	2266.867753	1387.606826	41	0.612125178	216.707778	0.095597892	2068.44171	Flank	TPVIVITGPH
152	250	8	520.6799612	330.6263069	45	0.634989497	49.28685982	0.094658645	535.0685236	615.6595004	399.0634301	45	0.648188536	59.4888638	0.096626242	632.6727443	Flank	QPVIVITGPH
153	250	9	1087.922613	441.4410352	57	0.405765107	58.47029349	0.053744901	1104.036966	1289.668548	544.670251	57	0.422333515	72.14333714	0.055939441	1308.771169	Flank	APVIVITGPH
154	250	10	619.679268	332.5303941	35	0.536616942	56.20789547	0.090704818	558.4622325	780.7801976	430.2327789	35	0.551029317	72.72261273	0.093140954	703.648282	Flank	GPVIVITGPH
155	250	11	1537.512824	930.3966451	30	0.605130982	169.86641	0.110481296	1608.938063	1913.76392	1201.430914	30	0.627784285	219.350271	0.114617205	2002.667923	Flank	NPVIVITGPH
156	250	12	106.3588017	108.3918143	53	1.019114662	14.88876075	0.139986165	76.79233689	119.3126303	121.7946505	53	1.02080266	16.72978187	0.140218029	86.14515728	Flank	EPVIVITGPH
157	250	13	1020.219903	699.1565511	64	0.685299855	87.39456889	0.085662482	900.3745593	1245.252604	871.2989094	64	0.699696517	108.9123637	0.087462065	1098.972645	Flank	RPVIVITGPH
158	250	14	452.6841367	353.6934355	49	0.781325005	50.52763365	0.111617858	381.7672206	532.6652869	425.1699706	49	0.798193502	60.73856722	0.114027643	449.2186264	Flank	HPVIVITMPH
159	250	15	948.3864968	597.8614988	42	0.630398578	92.25203207	0.097272612	899.0122121	1242.734276	804.3426628	42	0.647236242	124.1127674	0.09987072	1178.035847	Flank	HPVIVITHPH
160	250	16	786.4237596	448.050854	43	0.569732092	68.32711467	0.08688333	757.3610403	967.4333056	562.3012135	43	0.581229952	85.75013115	0.088636737	931.6812796	Flank	HPVIVITSPH
161	250	17	605.0486268	414.3268992	57	0.684782811	54.87893844	0.090701699	553.1661471	727.8790011	504.1091547	57	0.692572741	66.77088869	0.0917335	665.4639062	Flank	HPVIVITTPH
162	250	18	2148.666766	1183.379065	32	0.550750393	209.1938404	0.097359834	2201.869577	2616.378241	1469.795612	32	0.561767251	259.8256111	0.099307358	2681.161985	Flank	HPVIVITAPH
163	250	19	353.4112363	246.9442245	47	0.698744689	36.02051721	0.101922388	303.503305	473.5614158	338.8991842	47	0.715639351	49.43352663	0.104386728	406.6861494	Flank	HPVIVITDPH
164	250	20	315.4547095	256.9903906	56	0.814666521	34.34178548	0.108864393	306.767877	344.9791807	283.1514264	56	0.820778303	37.83770094	0.109681114	335.4793183	Flank	HPVIVITNPH
165	250	21	2137.215915	3054.865835	40	1.429366969	483.0166992	0.226002762	1906.759352	2458.70913	3519.787635	40	1.431559183	556.5272903	0.226349381	2193.585868	Flank	HPVIVITKPH
166	250	22	203.7061513	163.8145101	20	0.80417066	36.63003804	0.179818026	180.0383834	224.8247714	182.2937046	20	0.810825709	40.76211153	0.18130614	198.7033191	Flank	SCRAMBLED
167	250	23	1137.173492	497.5786325	67	0.437557362	60.78890506	0.05345614	1109.319452	1294.269599	584.1309125	67	0.451320894	71.36294901	0.055137623	1262.567632	Flank	HPVIVITEPH
168	250	24	225.2421151	168.7230637	35	0.749074229	28.51940303	0.126616654	224.7683633	252.536572	190.0641787	35	0.752620411	32.12670987	0.127216069	252.0054117	Flank	HPVIVITGFH
169	250	25	1394.758597	4908.201705	15	3.519033124	1267.292231	0.908610446	71.32584799	1645.881255	5803.245272	15	3.52591978	1498.391486	0.910388573	84.16788138	Flank	HPVIVITGDH
170	250	26	240.1645504	206.1879709	43	0.858527916	31.44337078	0.13092428	165.3357376	308.1967787	267.1779138	43	0.866906899	40.74424987	0.132202063	212.1709538	Flank	HPVIVITGYH
171	250	27	280.6277414	143.4212659	28	0.511073015	27.1040716	0.096583721	259.9400303	316.7726676	163.7883876	28	0.517053409	30.95309581	0.09771391	293.4203739	Flank	HPVIVITGIH
172	250	28	845.7190188	654.9110587	43	0.774383742	99.87300015	0.118092414	730.3946938	966.892078	751.8299833	43	0.777573837	114.6529976	0.118578899	835.0442967	Flank	HPVIVITGVH
173	250	29	260.0637465	199.0787536	61	0.76549983	25.48942247	0.09801221	230.7016263	308.9512212	238.029338	61	0.770443104	30.47653376	0.098645131	274.0695316	Flank	HPVIVITGLH
174	250	30	153.8149442	297.7855636	38	1.935998905	48.30719733	0.314060494	180.0823853	180.1976729	349.3703808	38	1.938817384	56.67535967	0.314517711	210.9705719	Flank	HPVIVITGEH
175	250	31	399.2705935	280.9755811	22	0.703722202	59.90419516	0.150034077	291.5684126	453.0259906	322.1581667	22	0.711125131	68.68435193	0.151612387	330.8234342	Flank	HPVIVITGSH
176	250	32	237.0920041	239.9801933	33	1.012181723	41.77518952	0.176198222	177.5767239	275.6231835	281.1320136	33	1.019986817	48.93880195	0.177556914	206.4357342	Flank	HPVIVITGTH
177	250	33	364.6066254	118.8759659	27	0.326038963	22.87769031	0.062746228	394.8048041	420.7378064	140.1415607	27	0.333085258	26.97025593	0.064102288	455.5849939	Flank	HPVIVITGRH
178	250	34	551.4785918	284.4778338	57	0.515845652	37.68000958	0.068325426	569.7383398	779.368021	427.0483566	57	0.547941852	56.56393663	0.072576671	805.1733085	Flank	HPVIVITGAH
179	250	35	1920.54602	1283.35637	39	0.668224743	205.5014862	0.107001594	1499.953684	2296.841924	1560.702029	39	0.679499104	249.9123345	0.108806937	1793.842205	Flank	HPVIVITGPP
180	250	36	1516.31208	818.1592754	40	0.539571824	129.36234	0.085313796	1370.672672	1840.077513	1013.252521	40	0.550657521	160.2092906	0.087066599	1663.340941	Flank	HPVIVITGPT
181	250	37	708.7038343	452.7685894	72	0.638868548	53.35928998	0.07529138	615.3617405	841.6188933	544.9648259	72	0.647519715	64.22472065	0.07631093	730.7707986	Flank	HPVIVITGPF
182	250	38	1767.756921	1631.563156	17	0.922956735	395.7121899	0.223849889	1519.589323	2201.106758	2060.676575	17	0.936200195	499.7874811	0.227061899	1892.103087	Flank	HPVIVITGPD
183	250	39	1255.898253	968.0115571	63	0.770772278	121.9579927	0.097108179	1269.954008	1497.137765	1163.483672	63	0.777138684	146.5851644	0.097910271	1513.893423	Flank	HPVIVITGPA
184	250	40	2052.165068	1323.480531	20	0.64491914	295.9392434	0.144208304	2437.758349	2562.812194	1668.613133	20	0.651086778	373.1132394	0.145587429	3044.353946	Flank	HPVIVITGPG
185	250	41	1604.60021	909.8171249	23	0.567005488	189.7099847	0.118228817	1938.207327	1805.225575	1034.887637	23	0.573273308	215.7889892	0.119535748	2180.544048	Flank	HPVIVITGPI
186	250	42	2150.093183	1493.055384	35	0.694414268	252.372422	0.117377435	2313.636649	2565.253462	1801.416892	35	0.702237389	304.4950302	0.118699783	2760.375443	Flank	HPVIVITGPQ
187	250	43	1348.20021	1395.21169	48	1.034869806	201.3814612	0.14937059	1168.064052	1436.947962	1488.652283	48	1.035982042	214.8684491	0.149531128	1244.954011	Flank	HPVIVITGPS
188	250	44	985.7765799	758.9353775	43	0.769885786	115.73656	0.117406482	1081.914454	1187.568797	929.1901234	43	0.782430564	141.7001654	0.119319542	1303.38646	Flank	HPVIVITGPV
189	250	45	474.2859827	444.3108132	33	0.936799377	77.34458487	0.16307584	377.6169538	533.8175138	501.9593606	33	0.940320142	87.37990888	0.163688726	425.0147607	Flank	HPVIVITGPY
190	250	46	471.1070614	519.3927	42	1.102493982	80.14403356	0.170118515	263.5956138	520.8416249	576.3665937	42	1.106606243	88.93529621	0.17075305	291.4232857	Flank	HPVIVITQPH
191	250	47	20265.29841	11081.31045	38	0.546812103	1797.625929	0.088704636	23295.94099	25718.9616	14531.23994	38	0.565001035	2357.278393	0.091655271	29565.19069	Flank	HPVIVITGPT(PO4)
192	250	48	13363.15417	7220.567597	48	0.540334079	1042.199161	0.077990506	16081.67719	16152.39483	8899.154885	48	0.550949564	1284.482367	0.07952272	19438.34488	Flank	HPVIVITGPS(PO4)
193	500	1	2940.802461	2218.540488	33	0.754399698	386.1983279	0.131324131	2032.064672	3279.398399	2489.545777	33	0.759147098	433.3742933	0.132150547	2266.031031	Flank	HPVIVITGPH
194	500	2	222.036074	207.9670914	38	0.936636501	33.73671711	0.151942504	163.1168232	270.7316055	255.3021983	38	0.943008475	41.41548543	0.152976175	198.8905615	Flank	SCRAMBLED
195	500	3	1521.919336	969.1951147	49	0.636824234	138.456445	0.090974891	1339.724203	1865.784561	1222.843235	49	0.655404306	174.6918907	0.093629187	1642.423928	Flank	FPVIVITGPH
196	500	4	4777.078265	1129.762328	48	0.236496508	163.067146	0.034135331	4762.819617	5231.858224	1265.60672	48	0.241903864	182.6745952	0.034915815	5216.242147	Flank	YPVIVITGPH
197	500	5	10568.97983	4444.911039	32	0.420561976	785.7566843	0.074345556	10198.7035	12581.26565	5464.112635	32	0.434305481	965.9277743	0.076775088	12140.49038	Flank	IPVIVITGPH
198	500	6	10726.39687	4272.173025	29	0.398285937	793.3226146	0.073959842	9930.237648	12659.41754	5328.315879	29	0.420897396	989.4434191	0.078158684	11719.78122	Flank	VPVIVITGPH
199	500	7	3954.696242	1955.164309	52	0.494390514	271.1325065	0.068559629	3850.06007	4482.914427	2278.872735	52	0.508346249	316.0227884	0.070494941	4364.302282	Flank	TPVIVITGPH
200	500	8	1583.950887	707.6164093	48	0.446741383	102.1356311	0.064481564	1534.294132	1872.886388	871.4751457	48	0.465311271	125.7866025	0.067161897	1814.171524	Flank	QPVIVITGPH
201	500	9	2293.700829	1116.748958	57	0.486876468	147.9170129	0.064488364	1988.847675	2719.04801	1361.613269	57	0.500768381	180.3500832	0.066328392	2357.66245	Flank	APVIVITGPH
202	500	10	1631.695237	712.749838	56	0.436815541	95.24520343	0.058371932	1593.661107	2055.894712	934.2076556	56	0.454404426	124.8387491	0.060722346	2007.97267	Flank	GPVIVITGPH
203	500	11	3426.554062	2125.452769	27	0.620288701	409.0435761	0.119374616	2884.621221	4265.080219	2739.92045	27	0.642407718	527.2979365	0.123631423	3590.528761	Flank	NPVIVITGPH
204	500	12	321.4880032	213.0742109	48	0.662774999	30.75461325	0.095663331	303.6304518	360.6432063	239.9603133	48	0.665367624	34.63528787	0.096037544	340.6107182	Flank	EPVIVITGPH
205	500	13	1931.195755	1731.694105	51	0.896695273	242.4856766	0.125562453	1525.638406	2357.164898	2139.705627	51	0.907745414	299.6187175	0.127109783	1862.152652	Flank	RPVIVITGPH
206	500	14	876.8795702	779.2540654	34	0.888667146	133.6409697	0.152405158	618.7819972	1031.808429	932.2738313	34	0.903533839	159.883643	0.154954775	728.1096539	Flank	HPVIVITMPH
207	500	15	1793.959376	1140.174237	61	0.635563019	145.9843519	0.081375506	1687.333511	2350.744991	1533.31428	61	0.652267382	196.3207764	0.08351428	2211.025985	Flank	HPVIVITHPH
208	500	16	1626.53196	968.1446358	46	0.595220174	142.7451389	0.087760427	1494.171656	2000.90749	1213.019789	46	0.606234818	178.8500105	0.089384447	1838.082086	Flank	HPVIVITSPH
209	500	17	1482.481403	720.4693157	61	0.485988771	92.24664327	0.062224486	1490.516235	1783.438611	886.1995818	61	0.496905011	113.4662295	0.063622167	1793.104587	Flank	HPVIVITTPH
210	500	18	3977.249844	2143.676522	36	0.538984627	357.2794204	0.089830771	3879.797729	4842.998512	2664.797505	36	0.55023711	444.1329174	0.091706185	4724.333488	Flank	HPVIVITAPH
211	500	19	653.6306752	425.6804097	38	0.651255251	69.054481	0.105647552	618.3856865	875.8472743	586.2480586	38	0.669349641	95.1019932	0.10858285	828.6199509	Flank	HPVIVITDPH
212	500	20	826.5246784	501.7498526	39	0.607059735	80.34427757	0.097207355	736.7871866	903.8819133	556.1019188	39	0.615237356	89.04757359	0.098516822	805.7455867	Flank	HPVIVITNPH
213	500	21	3888.346351	2398.989351	45	0.616969049	357.6202177	0.091972316	4118.118095	4473.25542	2782.503563	45	0.622031005	414.7911409	0.092726907	4737.590847	Flank	HPVIVITKPH
214	500	22	317.0086787	378.8813066	25	1.195176448	75.77626133	0.23903529	214.3661507	349.8735961	419.7308904	25	1.199664379	83.94617807	0.239932876	236.589914	Flank	SCRAMBLED
215	500	23	2676.864406	1273.495919	93	0.475741661	132.0553752	0.049332112	2434.253216	3046.662842	1488.082679	93	0.488430377	154.3069856	0.050647871	2770.535856	Flank	HPVIVITEPH
216	500	24	330.5356478	262.7264114	56	0.794850459	35.1082935	0.10621636	274.4443842	370.589396	295.8019711	56	0.798193295	39.52820108	0.106663066	307.7010884	Flank	HPVIVITGFH
217	500	25	385.060803	479.1763332	28	1.244417322	90.55581513	0.235172769	194.707279	454.3899989	574.2401389	28	1.263760515	108.5211857	0.238828289	229.7638181	Flank	HPVIVITGDH
218	500	26	769.010645	504.9398044	65	0.656609642	62.63007463	0.081442403	762.9273298	986.8509036	658.7505961	65	0.667527986	81.70795535	0.082796657	979.0443471	Flank	HPVIVITGYH
219	500	27	604.9634066	245.7398904	41	0.406206206	38.37812313	0.063438751	613.4725574	682.882851	282.512261	41	0.413705309	44.12100259	0.064609914	692.4879827	Flank	HPVIVITGIH
220	500	28	1405.692592	1125.872399	70	0.800937848	134.5674902	0.095730383	1296.311489	1607.097631	1292.142802	70	0.804022592	154.4406044	0.09609908	1482.044605	Flank	HPVIVITGVH
221	500	29	504.4273399	222.737376	51	0.441564837	31.18947115	0.061831445	519.6196011	599.2509328	269.7109176	51	0.450080096	37.76708263	0.06302382	617.2990756	Flank	HPVIVITGLH
222	500	30	415.090468	240.4409339	45	0.579249471	35.84281819	0.086349413	388.125993	486.2878359	286.2294654	45	0.588600916	42.66856946	0.087743444	454.6983459	Flank	HPVIVITGEH
223	500	31	556.3629343	519.0040014	45	0.932851506	77.36854852	0.139061292	524.856715	631.2683016	592.412912	45	0.938448692	88.31170279	0.139895671	595.520274	Flank	HPVIVITGSH
224	500	32	469.989989	426.5658798	26	0.90760631	83.65645172	0.177996242	431.8915692	546.3707535	500.6409499	26	0.916302614	98.18376818	0.179701727	502.0807413	Flank	HPVIVITGTH
225	500	33	796.3775162	472.135035	35	0.592853296	79.80538672	0.100210497	721.733768	918.979815	548.40802	35	0.596757416	92.69787429	0.100870414	832.8446637	Flank	HPVIVITGRH
226	500	34	1353.39489	595.8064613	59	0.440231056	77.56739436	0.057313202	1452.990234	1912.662999	913.1777456	59	0.477437869	118.8856162	0.062157116	2053.414475	Flank	HPVIVITGAH
227	500	35	3069.800007	1889.280862	31	0.615441025	339.3248598	0.110536471	2820.800243	3671.271233	2304.325616	31	0.627664226	413.8690982	0.112731823	3373.484515	Flank	HPVIVITGPP
228	500	36	2982.592288	1255.288188	49	0.420871533	179.326884	0.060124505	3265.635925	3619.440267	1574.430717	49	0.434992872	224.9186738	0.062141839	3962.919844	Flank	HPVIVITGPT
229	500	37	1435.006597	815.9154541	59	0.568579584	106.2231444	0.074022757	1304.29474	1704.137335	985.4740568	59	0.578283238	128.2977943	0.075286065	1548.910903	Flank	HPVIVITGPF
230	500	38	2434.591939	2917.82395	21	1.198485834	636.7213864	0.26153105	536.9356094	3031.410431	3664.108766	21	1.208714178	799.5740845	0.263763058	668.5605833	Flank	HPVIVITGPD
231	500	39	2515.013493	1971.688052	56	0.783967186	263.4778987	0.104762022	3109.129051	2998.110454	2369.188716	56	0.790227296	316.5961593	0.105598564	3706.34684	Flank	HPVIVITGPA
232	500	40	4674.292218	2078.165341	28	0.444594656	392.736334	0.084020492	4678.99167	5837.412049	2647.237099	28	0.453494987	500.2807875	0.085702497	5843.280881	Flank	HPVIVITGPG
233	500	41	3396.452081	1818.71405	37	0.535474668	298.994748	0.088031493	3812.70371	3821.115143	2071.45391	37	0.542107168	340.5449251	0.08912187	4289.411284	Flank	HPVIVITGPI
234	500	42	5415.02803	1586.882421	34	0.293051562	272.1480901	0.050257928	5286.107121	6460.612735	2010.12694	34	0.31113565	344.7339261	0.053359324	6306.798559	Flank	HPVIVITGPQ
235	500	43	2337.367616	2360.160748	53	1.009751624	324.1930113	0.138700053	1242.119637	2491.229127	2518.362341	53	1.010891497	345.9236714	0.138856626	1323.88444	Flank	HPVIVITGPS
236	500	44	2486.69911	1566.280628	40	0.629863348	247.6507119	0.09959014	2932.074521	2995.735881	1932.659018	40	0.645136652	305.5802219	0.102005061	3532.281334	Flank	HPVIVITGPV
237	500	45	1476.725025	954.3526146	39	0.646262912	152.8187222	0.103484887	1507.775028	1662.080918	1082.606391	39	0.651356007	173.3557626	0.104300435	1697.028262	Flank	HPVIVITGPY
238	500	46	1092.225081	855.8913495	32	0.783621768	151.3016443	0.138526067	1244.355971	1207.530798	953.2210743	32	0.789396904	168.5072714	0.139546976	1375.722078	Flank	HPVIVITQPH
239	500	47	23837.56387	17310.00132	56	0.726164864	2313.146225	0.097037862	32543.75724	30252.57153	22385.63767	56	0.739958176	2991.406662	0.098881071	41301.71813	Flank	HPVIVITGPT(PO4)
240	500	48	24565.631	6743.09466	52	0.274493037	935.0989827	0.038065335	25658.47606	29693.1223	8754.735639	52	0.294840521	1214.063394	0.040887024	31014.07278	Flank	HPVIVITGPS(PO4)
241	63	1	379.6171792	1162.617095	21	3.062604008	253.7038495	0.668314985	53.13942999	423.3252612	1296.974145	21	3.063776872	283.0229616	0.668570925	59.25775838	Flank	HPVIVITGPH
242	63	2	-66.57227109	37.25814609	36	-0.559664639	6.209691016	-0.09327744	-63.8484766	-81.17247576	46.28977826	36	-0.570264462	7.714963043	-0.095044077	-77.85131609	Flank	SCRAMBLED
243	63	3	64.96485995	101.9446964	29	1.569228295	18.93065487	0.291398379	51.6978721	79.64313868	125.5860716	29	1.576859899	23.32074803	0.292815532	63.37858344	Flank	FPVIVITGPH
244	63	4	421.7377937	230.0575954	33	0.54549912	40.04788694	0.094959208	427.4074187	461.8874178	253.0519978	33	0.547865103	44.05069861	0.095371073	468.0967936	Flank	YPVIVITGPH
245	63	5	742.55403	723.1970451	37	0.973931884	118.8928618	0.160113415	703.8806672	883.9329492	866.2056679	37	0.979944993	142.4033346	0.161101964	837.8963535	Flank	IPVIVITGPH
246	63	6	672.6851165	438.1177768	19	0.651296968	100.5111113	0.149417772	689.2764728	793.9107478	528.2404772	19	0.665365066	121.1866767	0.152645215	813.4920582	Flank	VPVIVITGPH
247	63	7	190.0816732	170.80264	48	0.898575003	24.65323755	0.12969813	175.0315231	215.4703732	195.2868943	48	0.906328287	28.18723525	0.13081722	198.4100149	Flank	TPVIVITGPH
248	63	8	37.11986866	87.53203594	42	2.358091208	13.50648638	0.363861373	34.33651775	43.89106841	103.6566439	42	2.36167967	15.99456741	0.364415085	40.59999413	Flank	QPVIVITGPH
249	63	9	71.39526481	99.79089619	26	1.397724295	19.57060488	0.274116287	64.59510194	84.63490545	118.7109314	26	1.402623785	23.28112906	0.275077156	76.57371058	Flank	APVIVITGPH
250	63	10	39.73809981	63.55564031	44	1.599362843	9.581373282	0.241113021	40.33195188	50.06900025	80.32349027	44	1.604255924	12.10922178	0.24185068	50.81723883	Flank	GPVIVITGPH
251	63	11	205.3898938	223.8692025	22	1.08997185	47.72907435	0.232382779	168.7191625	255.6517006	281.9095585	22	1.102709498	60.10331981	0.235098455	210.0071236	Flank	NPVIVITGPH
252	63	12	-48.65516093	57.81226243	52	-1.188204115	8.017118328	-0.164774264	-58.48742614	-54.58105145	64.9324688	52	-1.189652216	9.004513296	-0.164975079	-65.6108243	Flank	EPVIVITGPH
253	63	13	89.40123881	144.0725491	52	1.611527435	19.97926781	0.223478646	70.1586674	109.1207152	176.5248073	52	1.617702074	24.47958631	0.224334914	85.63375705	Flank	RPVIVITGPH
254	63	14	4.471875834	61.67725785	44	13.79225635	9.298196472	2.079260878	4.581465593	5.261975914	72.57960311	44	13.79322222	10.94178686	2.079406489	5.390928214	Flank	HPVIVITMPH
255	63	15	89.47664316	91.8485293	53	1.026508439	12.61636578	0.141001778	81.49944141	117.2472317	121.577632	53	1.036933924	16.69997209	0.142433829	106.7941706	Flank	HPVIVITHPH
256	63	16	134.7942178	153.1619731	40	1.136265157	24.21703429	0.179659296	98.83129897	165.8195268	189.3781039	40	1.1420736	29.94330737	0.180577692	121.5790966	Flank	HPVIVITSPH
257	63	17	58.95717983	81.5841754	49	1.383786939	11.6548822	0.197683848	54.51505919	70.92602357	98.42109138	49	1.387658386	14.06015591	0.198236912	65.58211203	Flank	HPVIVITTPH
258	63	18	319.538586	336.3489831	35	1.052608348	56.85335483	0.177923285	248.0758406	389.0942126	411.8228701	35	1.058414278	69.61077017	0.178904666	302.0757996	Flank	HPVIVITAPH
259	63	19	3.708758224	76.19461848	25	20.54450948	15.2389237	4.108901896	10.65449531	4.969634848	102.1016003	25	20.54509103	20.42032006	4.109018205	14.27673306	Flank	HPVIVITDPH
260	63	20	18.78733929	79.01752248	51	4.20589213	11.0646663	0.588942699	1.718340198	20.5457098	86.4374496	51	4.207080234	12.10366392	0.589109066	1.879165458	Flank	HPVIVITNPH
261	63	21	343.2448515	216.5452092	40	0.630876787	34.23880387	0.099750379	347.1188134	394.8778616	251.0744129	40	0.63582803	39.69835034	0.100533239	399.3345687	Flank	HPVIVITKPH
262	63	22	12.33551249	129.7400418	16	10.51760451	32.43501045	2.629401128	-22.08207137	13.61435949	143.1974049	16	10.51811545	35.79935122	2.629528861	-24.37136343	Flank	SCRAMBLED
263	63	23	166.6721542	159.6807884	51	0.958053187	22.35978278	0.13415428	141.2883953	189.6972659	182.9472546	51	0.964416929	25.6177397	0.135045382	160.8068391	Flank	HPVIVITEPH
264	63	24	10.57332621	49.84309029	29	4.714040719	9.255629506	0.875375386	8.094538164	11.85458392	55.88968674	29	4.714605518	10.37845428	0.875480266	9.075420547	Flank	HPVIVITGFH
265	63	25	-19.07274846	75.6971379	16	-3.968863642	18.92428447	-0.99221591	-39.41201521	-22.5067472	89.46366835	16	-3.974971041	22.36591709	-0.99374276	-46.50804602	Flank	HPVIVITGDH
266	63	26	-5.772955788	56.99640395	51	-9.873001983	7.981092931	-1.382496805	-21.13490015	-7.408280592	73.14739287	51	-9.873734123	10.24268374	-1.382599325	-27.12185513	Flank	HPVIVITGYH
267	63	27	-7.549262096	51.31952234	22	-6.797952129	10.94135893	-1.449328264	-16.8190794	-8.521609021	57.93334387	22	-6.798404353	12.35143041	-1.449424678	-18.98538121	Flank	HPVIVITGIH
268	63	28	58.58005855	89.48147387	75	1.527507416	10.33243061	0.176381364	52.63207757	66.97330116	102.4106922	75	1.529127136	11.82536814	0.176568393	60.17310444	Flank	HPVIVITGVH
269	63	29	12.84579147	51.53216812	41	4.011599305	8.047972554	0.626506555	-3.748496672	15.26057751	61.23376196	41	4.012545523	9.56310696	0.626654329	-4.453149045	Flank	HPVIVITGLH
270	63	30	-36.05357502	38.2060006	27	-1.059700753	7.352748244	-0.203939505	-43.39133531	-42.23757549	44.97631043	27	-1.064841197	8.655694978	-0.204928784	-50.83392699	Flank	HPVIVITGEH
271	63	31	14.74486609	151.450821	36	10.27142736	25.2418035	1.71190456	-3.247760799	16.73002639	171.8497806	36	10.27193721	28.6416301	1.711989535	-3.685019826	Flank	HPVIVITGSH
272	63	32	-38.53259312	62.15067068	54	-1.612937663	8.457635019	-0.219493014	-42.18184194	-44.79474548	72.47104813	54	-1.617847079	9.862060502	-0.220161101	-49.03705463	Flank	HPVIVITGTH
273	63	33	38.18455975	56.76315061	22	1.486547206	12.10194437	0.316932929	29.11314735	44.06307177	65.57063271	22	1.488108524	13.97970587	0.317265803	33.59511566	Flank	HPVIVITGRH
274	63	34	43.58919943	87.23653295	47	2.001333681	12.72475614	0.29192452	38.10222867	61.60171691	123.8099505	47	2.009845775	18.05953737	0.293166137	53.84734601	Flank	HPVIVITGAH
275	63	35	180.8992433	206.3474269	27	1.140676009	39.71158082	0.2195232	138.9466872	216.343145	248.2141855	27	1.14731708	47.76884227	0.220801275	166.170752	Flank	HPVIVITGPP
276	63	36	215.0175465	237.0295737	28	1.102373167	44.79437895	0.208328947	160.1569437	260.9284444	289.0673311	28	1.107841392	54.62859073	0.209362344	194.353916	Flank	HPVIVITGPT
277	63	37	54.36981829	70.6774483	34	1.29993902	12.12108239	0.222937703	39.7128216	64.5666978	84.20869362	34	1.304212489	14.44167181	0.223670597	47.16082988	Flank	HPVIVITGPF
278	63	38	144.1945474	311.4816555	15	2.16014864	80.42421762	0.557747981	-65.96068611	179.5425542	388.8604832	15	2.16584021	100.403345	0.559217538	-82.13035979	Flank	HPVIVITGPD
279	63	39	96.87879991	166.1396693	44	1.714922867	25.04649754	0.25853435	75.18307361	115.4877871	198.3841888	44	1.717793663	29.90754176	0.258967139	89.62463207	Flank	HPVIVITGPA
280	63	40	420.3340051	256.1059278	34	0.609291479	43.92180426	0.104492627	394.226898	524.9271273	323.2585475	34	0.615816045	55.43838354	0.10561158	492.323701	Flank	HPVIVITGPG
281	63	41	161.4822197	248.3858983	33	1.538162522	43.23843495	0.267759726	135.5291346	181.6725631	279.8636797	33	1.540484017	48.71801335	0.268163847	152.4745282	Flank	HPVIVITGPI
282	63	42	292.2344682	258.4564482	33	0.884414661	44.99149267	0.153956831	306.1247253	348.6618567	310.5078959	33	0.890570305	54.05248668	0.155028391	365.2341756	Flank	HPVIVITGPQ
283	63	43	154.9898587	239.9374817	41	1.548085041	37.47193914	0.241770265	59.00087231	165.1923504	255.8546655	41	1.548828773	39.9577856	0.241886416	62.88471295	Flank	HPVIVITGPS
284	63	44	126.2811649	162.31787	43	1.285368805	24.75324311	0.196016905	111.8517385	152.1313999	196.6939826	43	1.292921663	29.99555114	0.197168705	134.7482151	Flank	HPVIVITGPV
285	63	45	37.44693175	133.0961835	24	3.554261384	27.16814468	0.725510567	7.713573822	42.14720387	149.8413589	24	3.555190977	30.58623931	0.725700319	8.681767858	Flank	HPVIVITGPY
286	63	46	13.92996514	76.45420921	25	5.488470966	15.29084184	1.097694193	1.147206991	15.40054537	84.53819051	25	5.489298493	16.9076381	1.097859699	1.268317124	Flank	HPVIVITQPH
287	63	47	6826.941718	5904.294091	37	0.864851984	970.6599693	0.14218079	8581.440228	8664.163159	7593.83948	37	0.876465429	1248.41952	0.144090029	10890.82071	Flank	HPVIVITGPT(PO4)
288	63	48	4334.988121	2150.293527	53	0.496032161	295.3655315	0.068135257	5197.082698	5239.813805	2659.598646	53	0.507575029	365.3239698	0.069720792	6281.850125	Flank	HPVIVITGPS(PO4)
