# Supplementary material for: Quantitative mapping of protein-peptide affinity landscapes using spectrally encoded beads
Source: eLife journal article supplement (doi:10.7554/elife.40499), 2019-07-08
Supplement: supp [file elife-40499-supp-v1.zip › elife_poa_e40499_Figure_3_source_data_3.csv]

	conc	code	AVG	SD	N	CV	SEM	RSEM	MED	AVG_NORM	SD_NORM	N_NORM	CV_NORM	SEM_NORM	RSEM_NORM	MED_NORM	library	sequence
1	1000	1	NA	NA	0	NA	NA	NA	NA	NA	NA	0	NA	NA	NA	NA	Pos1to6	HPKYVITGPH
2	1000	2	1501.328176	506.9260408	16	0.33765172	126.7315102	0.08441293	1301.016467	2393.053262	899.0614875	16	0.375696397	224.7653719	0.093924099	2073.764917	Pos1to6	HPKVVITGPH
3	1000	3	203.3459593	155.4286026	18	0.764355501	36.63487295	0.180160319	170.0124768	256.1808621	197.5394061	18	0.771093533	46.56048454	0.181748489	214.1864191	Pos1to6	HPKTVITGPH
4	1000	4	197.3853156	92.62183614	24	0.469243803	18.90635313	0.09578399	183.0560789	249.5008503	120.2626235	24	0.482012881	24.54850523	0.098390467	231.3882732	Pos1to6	HPKMVITGPH
5	1000	5	9295.58304	1562.466874	21	0.168087022	340.9582248	0.036679595	9339.507046	11502.34744	2247.401313	21	0.195386318	490.423173	0.04263679	11556.69897	Pos1to6	HPKIVITGPH
6	1000	6	-24.30379857	50.43745853	20	-2.075291168	11.27815859	-0.464049213	-40.01272635	-32.33291195	67.21455153	20	-2.078827655	15.02963063	-0.464839995	-53.23151251	Pos1to6	Scrambled
7	1000	7	8440.902723	2186.938871	31	0.259088268	392.7858164	0.046533627	8677.458	11161.62047	3248.769502	31	0.291066115	583.4962277	0.052277017	11474.42353	Pos1to6	HPKIFITGPH
8	1000	8	6403.830017	1095.528638	20	0.171073972	244.9676505	0.038253303	6309.949844	10080.4978	2114.941529	20	0.209805267	472.9153027	0.046913884	9932.717661	Pos1to6	HPKIYITGPH
9	1000	9	7999.436491	1787.405273	21	0.223441398	390.0438076	0.04875891	7761.807475	10888.73714	2773.463356	21	0.254709368	605.2193221	0.055582141	10565.27937	Pos1to6	HPKIRITGPH
10	1000	10	1135.473874	424.1757734	23	0.37356718	88.44676285	0.077894142	1032.540867	1562.306686	614.6879825	23	0.393448987	128.1713045	0.082039785	1420.68042	Pos1to6	HPKIMITGPH
11	1000	11	1838.282907	4685.124082	19	2.548641487	1074.84118	0.584698457	207.8990793	2476.170041	6316.288867	19	2.550830017	1449.056046	0.58520054	280.0403952	Pos1to6	HPKIGITGPH
12	1000	12	11182.32143	2699.927151	19	0.241446033	619.4057688	0.055391519	10746.73717	17457.34735	5064.842895	19	0.290126718	1161.95465	0.066559634	16777.33241	Pos1to6	HPKIIITGPH
13	1000	13	1745.290435	612.3377601	21	0.350851496	133.6230541	0.076562073	1593.427733	2284.927291	859.4317155	21	0.376130881	187.5433758	0.082078487	2086.109246	Pos1to6	HPKIQITGPH
14	1000	14	7608.221951	2007.845667	23	0.263904718	418.6647627	0.055027938	7161.916364	9989.146605	2865.38142	23	0.286849471	597.4733278	0.059812249	9403.173698	Pos1to6	HPKILITGPH
15	1000	15	697.9388024	137.8810371	14	0.197554623	36.85025721	0.052798694	672.1921602	917.2498613	219.8183913	14	0.239649413	58.74893625	0.064049	883.4129347	Pos1to6	HPKIEITGPH
16	1000	16	1771.50253	706.3929498	10	0.398753565	223.3810645	0.126096949	1553.418387	2346.316719	982.539753	10	0.418758365	310.7063511	0.132423022	2057.468997	Pos1to6	HPKISITGPH
17	1000	17	5355.544756	2071.454863	11	0.386786958	624.5671411	0.116620656	4845.710885	6928.380829	2809.734915	11	0.405539907	847.1669522	0.122274883	6268.817073	Pos1to6	HPKIKITGPH
18	1000	18	428.4140867	160.7597962	17	0.375243955	38.98997765	0.091010027	365.8016111	556.0427224	219.2684915	17	0.39433749	53.18042063	0.09564089	474.7773942	Pos1to6	HPKIAITGPH
19	1000	19	2241.719921	793.3645262	19	0.353908853	182.010305	0.081192259	2121.562208	2988.070995	1114.899545	19	0.373116819	255.7754973	0.085598869	2827.908357	Pos1to6	HPKIHITGPH
20	1000	20	98.18766384	63.50474773	13	0.646769108	17.61304801	0.179381475	114.1816992	141.9702379	94.04593405	13	0.662434151	26.08364904	0.183726177	165.0961268	Pos1to6	HPKIVDTGPH
21	1000	21	593.3232704	279.2240855	9	0.470610373	93.07469516	0.156870124	507.3692514	737.0962263	360.4266555	9	0.488981822	120.1422185	0.162993941	630.3139945	Pos1to6	HPKIVRTGPH
22	1000	22	93.27745737	64.12825921	21	0.687500078	13.99393343	0.150024817	75.6816568	125.8484041	87.90426604	21	0.698493292	19.18228348	0.152423732	102.1084407	Pos1to6	HPKIVQTGPH
23	1000	23	114.0614835	140.7930919	14	1.234361395	37.6285366	0.32989696	66.98703011	163.472221	203.1439661	14	1.242681875	54.29250868	0.332120701	96.00540216	Pos1to6	HPKIVETGPH
24	1000	24	7508.734386	1477.94542	15	0.196830164	381.6038665	0.05082133	7400.932082	10599.95687	2604.459855	15	0.24570476	672.468643	0.063440696	10447.77413	Pos1to6	HPKIVVTGPH
25	1000	25	3303.826144	1442.325135	21	0.436562056	314.7411481	0.095265651	3033.403544	4476.842228	2026.317077	21	0.452621954	442.1786375	0.098770208	4110.406688	Pos1to6	HPKIVLTGPH
26	1000	26	158.6960603	71.95100232	22	0.453388712	15.34000524	0.096662798	129.6441914	197.9056986	93.86112432	22	0.474271964	20.01125894	0.101115122	161.6758741	Pos1to6	HPKIVHTGPH
27	1000	27	159.7646355	273.7597329	12	1.713518965	79.02762774	0.494650318	68.42756111	203.9351095	350.2014363	12	1.717219939	101.0944468	0.495718697	87.3458768	Pos1to6	HPKIVATGPH
28	1000	28	76.58061161	71.09237508	17	0.928333864	17.24243362	0.225154034	83.80349688	105.4731046	98.97933266	17	0.938431963	24.00601431	0.227603183	115.4210551	Pos1to6	HPKIVGTGPH
29	1000	29	443.0101197	259.967309	8	0.58682025	91.91232355	0.207472289	350.2507889	546.8376351	327.3108464	8	0.598552158	115.7218595	0.211620145	432.3384604	Pos1to6	HPKIVYTGPH
30	1000	30	90.72701469	79.77239631	5	0.87925737	35.67530018	0.39321585	62.69415582	113.6832949	101.7356832	5	0.894904421	45.49758067	0.400213424	78.55739803	Pos1to6	HPKIVSTGPH
31	1000	31	213.8493804	121.0164436	17	0.565895694	29.35079878	0.137249866	203.6006572	312.9724521	182.2086865	17	0.582187618	44.19209766	0.141201238	297.9732595	Pos1to6	HPKIVKTGPH
32	1000	32	693.5076618	297.778686	20	0.429380528	66.58533841	0.096012405	687.6528828	921.0273148	412.2127672	20	0.447557592	92.17357688	0.10007692	913.2517534	Pos1to6	HPKIVIEGPH
33	1000	33	6239.121374	1852.871477	21	0.296976348	404.3297047	0.064805552	5798.525366	8371.153156	2775.286679	21	0.331529794	605.6172039	0.072345732	7779.996735	Pos1to6	HPKIVIHGPH
34	1000	34	500.8108133	161.3937515	15	0.32226491	41.67168745	0.083208442	465.2892445	645.7521744	229.3030004	15	0.35509443	59.20578011	0.091684988	599.9501875	Pos1to6	HPKIVIDGPH
35	1000	35	1663.722039	768.6829563	10	0.462026071	243.078894	0.146105472	1339.732027	2065.28824	1023.580281	10	0.495611344	323.6845056	0.156726068	1663.098003	Pos1to6	HPKIVIQGPH
36	1000	36	8409.556936	1464.399271	14	0.174135128	391.3771677	0.04653957	8506.846804	10148.15533	2078.111937	14	0.204777309	555.3987771	0.054729038	10265.55899	Pos1to6	HPKIVISGPH
37	1000	37	2128.693138	1019.617628	13	0.478987605	282.7910491	0.132847259	1878.938353	2785.852046	1388.364173	13	0.498362494	385.0629397	0.138220887	2458.994281	Pos1to6	HPKIVIRGPH
38	1000	38	896.5014552	295.0411247	9	0.329102784	98.34704156	0.109700928	782.6082164	1230.260453	431.0793639	9	0.350396831	143.6931213	0.116798944	1073.965841	Pos1to6	HPKIVIVGPH
39	1000	39	1318.843392	462.9713212	8	0.35104344	163.6850804	0.124112598	1091.382834	1572.761147	570.5073609	8	0.362742532	201.7048118	0.128248852	1301.507463	Pos1to6	HPKIVIFGPH
40	1000	40	NA	NA	0	NA	NA	NA	NA	NA	NA	0	NA	NA	NA	NA	Pos1to6	HPKIVIYGPH
41	1000	41	355.8532652	112.7481754	17	0.316838951	27.3454492	0.076844733	326.0559081	452.939305	150.472854	17	0.332214167	36.4950277	0.080573771	415.0124527	Pos1to6	HPKIVIAGPH
42	1000	42	345.6075757	310.6935652	19	0.898977879	71.27799228	0.20623967	234.9554293	466.6399576	424.0458948	19	0.908721784	97.28280014	0.208475075	317.2372346	Pos1to6	HPKIVIGGPH
43	1000	43	1342.302702	417.6313814	20	0.311130553	93.38521584	0.069570907	1285.432173	1760.371438	583.5227963	20	0.331477087	130.4796639	0.07412053	1685.788221	Pos1to6	HPKIVIIGPH
44	1000	44	724.7272725	337.1752357	11	0.465244304	101.6621587	0.140276436	626.2670802	1044.996102	510.4671512	11	0.488487135	153.9116371	0.147284413	903.0247408	Pos1to6	HPKIVIKGPH
45	1000	45	798.2471553	291.7954289	12	0.365545216	84.23408471	0.105523814	856.0035748	990.4333865	376.1106379	12	0.379743497	108.573789	0.109622505	1062.095259	Pos1to6	HPKIVILGPH
46	1000	46	787.9311245	306.9835621	16	0.389607102	76.74589052	0.097401776	787.272601	1184.259514	488.7931459	16	0.412741583	122.1982865	0.103185396	1183.269754	Pos1to6	HPKIVIMGPH
47	1000	47	2197.489217	761.0278104	19	0.346316971	174.5917536	0.079450562	2310.675842	2888.380043	1083.826188	19	0.375236697	248.6467803	0.086085202	3037.152554	Pos1to6	HPKIVINGPH
48	1000	48	216.5552056	176.5703317	7	0.815359442	66.73731236	0.308176902	173.8560966	255.0387377	210.6281445	7	0.825867264	79.60995564	0.312148485	204.7516673	Pos1to6	G
49	125	1	NA	NA	0	NA	NA	NA	NA	NA	NA	0	NA	NA	NA	NA	Pos1to6	HPKYVITGPH
50	125	2	87.77771852	55.37819245	11	0.630891226	16.69715327	0.190220862	88.89046913	139.9139502	91.23020835	11	0.652045119	27.50694278	0.196599001	141.6876274	Pos1to6	HPKVVITGPH
51	125	3	-5.340682789	16.26620538	21	-3.045716442	3.549577021	-0.664629816	-8.06841732	-6.728339848	20.50403977	21	-3.047414404	4.4743483	-0.665000342	-10.16481523	Pos1to6	HPKTVITGPH
52	125	4	-4.351787354	12.96380372	13	-2.97896075	3.595512233	-0.826215056	-7.464858981	-5.500787339	16.39784043	13	-2.980998795	4.547942653	-0.826780308	-9.435801529	Pos1to6	HPKMVITGPH
53	125	5	1242.194706	432.8163874	31	0.348428781	77.73611798	0.062579656	1144.294459	1537.090791	557.0235104	31	0.362388164	100.0443758	0.065086836	1415.9491	Pos1to6	HPKIVITGPH
54	125	6	-41.69596971	13.14270378	24	-0.315203217	2.682743176	-0.064340587	-43.69003002	-55.47083979	18.73272974	24	-0.337704095	3.823802445	-0.06893356	-58.12366693	Pos1to6	Scrambled
55	125	7	1286.907955	374.4389514	22	0.290960165	79.83065268	0.062032916	1230.328127	1701.711137	544.150096	22	0.31976643	116.0131903	0.068174432	1626.894191	Pos1to6	HPKIFITGPH
56	125	8	806.1254424	157.6368008	30	0.195548723	28.78041056	0.035702149	840.6358279	1268.950882	292.1103129	30	0.230198282	53.33180256	0.042028264	1323.274914	Pos1to6	HPKIYITGPH
57	125	9	1217.758972	339.6020623	21	0.278874613	74.10724555	0.06085543	1126.759403	1657.598927	504.7432384	21	0.304502633	110.1440046	0.066447922	1533.731404	Pos1to6	HPKIRITGPH
58	125	10	42.98847409	42.83462017	25	0.996421043	8.566924034	0.199284209	30.93420244	59.14815129	59.38735251	25	1.004044103	11.8774705	0.200808821	42.56259206	Pos1to6	HPKIMITGPH
59	125	11	-0.051348701	19.18791019	19	-373.6785863	4.402008497	-85.72774712	-2.920055266	-0.069166784	25.846147	19	-373.6786013	5.929512783	-85.72775054	-3.933319154	Pos1to6	HPKIGITGPH
60	125	12	1765.866945	652.6628647	30	0.369599118	119.1593911	0.067479258	1733.833794	2756.793643	1111.233505	30	0.403089113	202.8825525	0.073593667	2706.784899	Pos1to6	HPKIIITGPH
61	125	13	81.07416147	94.47969496	23	1.165349024	19.70037824	0.242992069	69.27123866	106.1419695	124.5265627	23	1.173207576	25.96558325	0.24463069	90.6896299	Pos1to6	HPKIQITGPH
62	125	14	1111.263376	292.4304511	19	0.263151344	67.08814655	0.060371059	1135.897144	1459.023258	417.5090054	19	0.286156511	95.78313486	0.065648806	1491.365942	Pos1to6	HPKILITGPH
63	125	15	32.89987123	47.97115853	12	1.458095632	13.84808065	0.420915953	25.35034887	43.23789166	63.31726626	12	1.464393009	18.27812036	0.422733849	33.31610724	Pos1to6	HPKIEITGPH
64	125	16	86.93384743	38.55102923	23	0.443452468	8.038445271	0.092466232	69.61338884	115.1419974	53.14077668	23	0.461523839	11.08061791	0.096234373	92.20142527	Pos1to6	HPKISITGPH
65	125	17	537.5843265	293.0105413	13	0.54505038	81.26650238	0.151169776	406.0086525	695.4640679	388.4267257	13	0.558514442	107.7301905	0.154904035	525.2467662	Pos1to6	HPKIKITGPH
66	125	18	7.361837969	29.34848874	18	3.986570863	6.917505136	0.939643764	-1.058404931	9.554999599	38.10928823	18	3.988413378	8.982445377	0.940078049	-1.373713838	Pos1to6	HPKIAITGPH
67	125	19	210.9755683	149.6389431	25	0.70927143	29.92778863	0.141854286	175.6710471	281.2171005	202.2087149	25	0.719048431	40.44174299	0.143809686	234.1584047	Pos1to6	HPKIHITGPH
68	125	20	-22.28642624	31.7411151	13	-1.424235307	8.803401388	-0.395011802	-26.89490757	-32.22410138	46.12612998	13	-1.431417107	12.79308668	-0.397003675	-38.88753714	Pos1to6	HPKIVDTGPH
69	125	21	28.08720641	20.72172501	22	0.737763831	4.417886616	0.157291777	23.2370463	34.89324435	26.15654408	22	0.749616282	5.576593936	0.159818728	28.86780276	Pos1to6	HPKIVRTGPH
70	125	22	-12.67240534	63.06919026	22	-4.976891802	13.44639654	-1.061076897	-24.15092838	-17.09739988	85.11807673	22	-4.978422293	18.14723493	-1.061403199	-32.58403349	Pos1to6	HPKIVQTGPH
71	125	23	-22.4775991	19.6960618	28	-0.876252918	3.722205809	-0.165596236	-23.70880925	-32.21475767	28.60462534	28	-0.88793545	5.405766072	-0.167804027	-33.97932053	Pos1to6	HPKIVETGPH
72	125	24	878.8688004	232.6966464	23	0.264768355	48.52060488	0.055208018	829.7167844	1240.684635	375.7677127	23	0.302871255	78.35298443	0.063153022	1171.297542	Pos1to6	HPKIVVTGPH
73	125	25	181.7009502	82.47736352	24	0.453918174	16.83562133	0.092655659	180.8243489	246.2134662	115.568812	24	0.469384611	23.59038497	0.095812732	245.0256296	Pos1to6	HPKIVLTGPH
74	125	26	-5.340844922	15.35530291	18	-2.87506998	3.619279604	-0.677660493	-5.065433685	-6.660427757	19.17162216	18	-2.87843707	4.518794678	-0.678454124	-6.316969619	Pos1to6	HPKIVHTGPH
75	125	27	-25.67528594	12.68606861	16	-0.494096488	3.171517152	-0.123524122	-25.16969653	-32.77378773	16.6091792	16	-0.506782412	4.1522948	-0.126695603	-32.12841692	Pos1to6	HPKIVATGPH
76	125	28	-26.69033229	17.9511934	15	-0.67257287	4.634978206	-0.173657568	-28.79345244	-36.76011658	25.23375311	15	-0.686443773	6.515327037	-0.17723902	-39.65670629	Pos1to6	HPKIVGTGPH
77	125	29	4.072775611	17.43235509	8	4.280214959	6.163268249	1.513284511	0.007300118	5.027304986	21.52611146	8	4.281839181	7.610629695	1.51385876	0.009011034	Pos1to6	HPKIVYTGPH
78	125	30	-22.54553258	16.29349444	11	-0.722692816	4.912673415	-0.217900083	-17.27163986	-28.25013518	20.95172388	11	-0.741650394	6.317182439	-0.223616007	-21.64181125	Pos1to6	HPKIVSTGPH
79	125	31	-10.90236359	15.49433001	18	-1.421189991	3.652048606	-0.334977693	-11.269382	-15.95580711	22.78098973	18	-1.427755398	5.369530774	-0.336525175	-16.49294522	Pos1to6	HPKIVKTGPH
80	125	32	5.634007511	19.31617415	21	3.428496344	4.215134771	0.748159239	3.8744904	7.482361183	25.670636	21	3.430820214	5.601792028	0.748666349	5.145597785	Pos1to6	HPKIVIEGPH
81	125	33	716.7368708	328.2445982	20	0.457970856	73.39772349	0.102405397	648.214438	961.6601055	462.6518264	20	0.481097036	103.4520934	0.107576568	869.7221954	Pos1to6	HPKIVIHGPH
82	125	34	-8.442950498	20.49855487	19	-2.427889975	4.702691009	-0.55699616	-12.9497842	-10.88645352	26.4809197	19	-2.432465233	6.075139627	-0.558045797	-16.6976253	Pos1to6	HPKIVIDGPH
83	125	35	82.03914499	47.15796492	19	0.574822726	10.81877913	0.131873377	67.13083731	101.8406185	61.32324873	19	0.602149218	14.06851811	0.138142505	83.3339498	Pos1to6	HPKIVIQGPH
84	125	36	847.2962499	403.2406536	18	0.475914597	95.04473354	0.112174146	774.2965442	1022.466941	498.9234358	18	0.487960457	117.5973816	0.115013383	934.3752191	Pos1to6	HPKIVISGPH
85	125	37	236.0905934	100.3347816	19	0.424984241	23.01837754	0.097498071	210.1865269	308.975235	138.0215769	19	0.446707572	31.66432135	0.102481745	275.0742019	Pos1to6	HPKIVIRGPH
86	125	38	58.34554168	37.64601492	17	0.645225219	9.13049976	0.156490102	49.48359373	80.06703408	52.5513609	17	0.656342045	12.74557716	0.159186328	67.90586686	Pos1to6	HPKIVIVGPH
87	125	39	92.51176534	61.76230844	13	0.667615716	17.12978231	0.185163284	76.68272049	110.3231142	74.34021291	13	0.673840776	20.61826535	0.186889805	91.44649329	Pos1to6	HPKIVIFGPH
88	125	40	5.546655995	0	1	0	0	0	5.546655995	7.714924816	1.053672018	1	0.136575799	1.053672018	0.136575799	7.714924816	Pos1to6	HPKIVIYGPH
89	125	41	20.08921844	25.07918389	18	1.248390223	5.911220331	0.294248397	13.49847387	25.5700805	32.02347596	18	1.252380725	7.548005669	0.295188968	17.18120914	Pos1to6	HPKIVIAGPH
90	125	42	-5.588968066	16.98337717	15	-3.03873219	4.38508913	-0.784597278	-10.87618312	-7.546234531	22.95284629	15	-3.041629066	5.926399429	-0.785345248	-14.68504162	Pos1to6	HPKIVIGGPH
91	125	43	138.3918042	152.2383826	13	1.100053456	42.22333035	0.305099934	90.82680971	181.4948143	200.7296909	13	1.10598031	55.67239947	0.306743747	119.1153988	Pos1to6	HPKIVIIGPH
92	125	44	60.12978481	36.28024528	11	0.603365626	10.93890554	0.181921581	66.98995325	86.70211969	53.88224568	11	0.621463995	16.24610835	0.187378445	96.5939087	Pos1to6	HPKIVIKGPH
93	125	45	71.90212234	26.68539247	14	0.371134976	7.131971133	0.099189995	69.42313889	89.21329948	34.3584716	14	0.385127238	9.18268779	0.102929584	86.13747521	Pos1to6	HPKIVILGPH
94	125	46	46.04784585	28.67681798	26	0.622761336	5.62398671	0.122133546	44.88668314	69.20985582	44.12059647	26	0.637490079	8.65276086	0.125022091	67.46462969	Pos1to6	HPKIVIMGPH
95	125	47	127.0937118	59.44023829	22	0.467688271	12.67270138	0.099711474	107.679508	167.0519873	81.77010539	22	0.489488971	17.43344505	0.104359399	141.5339559	Pos1to6	HPKIVINGPH
96	125	48	-17.77576495	32.45712191	2	-1.825919841	22.950651	-1.291120301	-17.77576495	-20.93465564	38.32373893	2	-1.830636223	27.09897568	-1.294455288	-20.93465564	Pos1to6	G
97	2000	1	NA	NA	0	NA	NA	NA	NA	NA	NA	0	NA	NA	NA	NA	Pos1to6	HPKYVITGPH
98	2000	2	2291.122641	386.0278858	19	0.16848853	88.56087072	0.03865392	2282.707109	3651.952051	860.5558501	19	0.235642702	197.4250519	0.054060143	3638.53805	Pos1to6	HPKVVITGPH
99	2000	3	435.4492613	276.5079059	19	0.634994546	63.43526415	0.14567774	384.7206013	548.5910196	352.7930707	19	0.643089402	80.93628121	0.147534827	484.681651	Pos1to6	HPKTVITGPH
100	2000	4	440.0031719	238.1093468	18	0.541153705	56.12291126	0.127551152	380.8183896	556.1769637	307.155748	18	0.552262621	72.39730409	0.130169548	481.3656564	Pos1to6	HPKMVITGPH
101	2000	5	10690.69759	2764.504656	19	0.258589735	634.2208644	0.059324554	11527.1551	13228.66112	3665.82448	19	0.277112283	840.9978134	0.063573918	14263.69302	Pos1to6	HPKIVITGPH
102	2000	6	-18.74720273	42.88073573	18	-2.287313811	10.10708634	-0.539125036	-24.92275466	-24.94061384	57.1270488	18	-2.290522966	13.46497453	-0.539881441	-33.15634917	Pos1to6	Scrambled
103	2000	7	11556.41065	2223.55876	26	0.192409116	436.0757503	0.037734532	11547.82785	15281.33588	3571.193603	26	0.233696428	700.3686872	0.04583164	15269.98662	Pos1to6	HPKIFITGPH
104	2000	8	8616.142209	2647.488493	26	0.307270752	519.2152111	0.060260752	9119.574795	13562.97752	4481.271417	26	0.330404693	878.8496309	0.064797691	14355.44875	Pos1to6	HPKIYITGPH
105	2000	9	11092.27047	3048.125981	20	0.2747973	681.5816898	0.061446544	10558.92225	15098.66571	4541.270043	20	0.300772938	1015.458852	0.067254873	14372.6785	Pos1to6	HPKIRITGPH
106	2000	10	1948.699567	831.0109729	23	0.426443864	173.2777661	0.088919692	1883.357257	2681.229776	1190.369505	23	0.443964003	248.2091998	0.092572894	2591.324822	Pos1to6	HPKIMITGPH
107	2000	11	1977.055078	4509.152049	32	2.280741746	797.1129979	0.403181989	502.3840563	2663.096379	6080.347251	32	2.283187082	1074.863693	0.403614267	676.7121342	Pos1to6	HPKIGITGPH
108	2000	12	12327.70603	2690.568034	14	0.218253747	719.0845541	0.058330767	12276.67349	19245.4713	5218.044043	14	0.271131009	1394.580931	0.07246281	19165.80154	Pos1to6	HPKIIITGPH
109	2000	13	2712.144974	778.9755622	14	0.287217523	208.1899762	0.076762112	2635.531519	3550.729404	1127.721795	14	0.317602855	301.3963275	0.084882933	3450.427374	Pos1to6	HPKIQITGPH
110	2000	14	9101.510504	1247.120036	12	0.137023413	360.0125442	0.039555252	8989.326191	11949.74638	2117.91632	12	0.177235253	611.3897786	0.05116341	11802.455	Pos1to6	HPKILITGPH
111	2000	15	1416.457107	362.8746164	12	0.256184684	104.7528787	0.073954148	1380.800077	1861.545855	539.6383667	12	0.289887227	155.7801781	0.083683234	1814.684432	Pos1to6	HPKIEITGPH
112	2000	16	2884.038403	743.2527775	15	0.257712511	191.9070419	0.066541084	2825.761596	3819.846379	1098.960578	15	0.287697585	283.7504012	0.074283197	3742.66001	Pos1to6	HPKISITGPH
113	2000	17	7273.899607	2462.843666	10	0.338586425	778.8195505	0.107070429	6975.540599	9410.125186	3386.32782	10	0.359860018	1070.850881	0.11379773	9024.143007	Pos1to6	HPKIKITGPH
114	2000	18	725.4992224	241.7020279	13	0.333152704	67.03608115	0.092399935	715.1633531	941.6323488	333.8279311	13	0.354520457	92.58720943	0.098326284	928.2173256	Pos1to6	HPKIAITGPH
115	2000	19	3714.470464	1180.536565	14	0.317820959	315.5116684	0.084941224	3474.536656	4951.154402	1678.834513	14	0.33907941	448.687397	0.090622784	4631.337798	Pos1to6	HPKIHITGPH
116	2000	20	483.2634958	1448.672341	23	2.997686259	302.0690643	0.625060794	166.7631087	698.7541079	2097.034495	23	3.001105069	437.2619189	0.625773665	241.1239587	Pos1to6	HPKIVDTGPH
117	2000	21	951.5912305	254.4671501	18	0.267412248	59.97848247	0.063029671	928.5217812	1182.178991	352.952024	18	0.298560562	83.19158986	0.070371399	1153.519397	Pos1to6	HPKIVRTGPH
118	2000	22	260.8141926	117.5836336	16	0.450832957	29.39590841	0.112708239	230.4600312	351.8861988	164.4806872	16	0.467425798	41.1201718	0.116856449	310.9328659	Pos1to6	HPKIVQTGPH
119	2000	23	285.95027	134.5987632	26	0.470706893	26.39698923	0.092313217	286.9197065	409.8221794	201.6788063	26	0.492112961	39.55246803	0.096511292	411.2115699	Pos1to6	HPKIVETGPH
120	2000	24	11562.48804	1771.894504	20	0.153245089	396.2076559	0.034266644	11500.46678	16322.57425	3466.876834	20	0.212397676	775.217227	0.047493564	16235.01986	Pos1to6	HPKIVVTGPH
121	2000	25	4051.450888	1219.287999	23	0.300950951	254.2391227	0.062752611	3968.618533	5489.909465	1777.6771	23	0.32380809	370.6712988	0.067518654	5377.667667	Pos1to6	HPKIVLTGPH
122	2000	26	335.4135658	190.2886284	13	0.567325379	52.77656976	0.15734775	279.3587499	418.2854692	244.3412546	13	0.584149517	67.76807094	0.162013926	348.380977	Pos1to6	HPKIVHTGPH
123	2000	27	151.6018376	61.31739538	12	0.404463405	17.70080736	0.116758528	144.6134761	193.5155253	81.25064983	12	0.419866312	23.45504227	0.121204964	184.5950763	Pos1to6	HPKIVATGPH
124	2000	28	212.4960956	139.1341944	16	0.654761181	34.7835486	0.163690295	161.1983243	292.6670661	195.7947027	16	0.669001488	48.94867567	0.167250372	222.0155646	Pos1to6	HPKIVGTGPH
125	2000	29	768.1153855	281.6942784	11	0.366734326	84.93402064	0.11057456	778.6277617	948.1372597	365.2491854	11	0.385228174	110.126773	0.116150665	961.1134033	Pos1to6	HPKIVYTGPH
126	2000	30	271.9206464	79.51031753	13	0.29240265	22.05219437	0.081097904	265.4625959	340.7235997	114.6673926	13	0.336540799	31.80301259	0.093339624	332.6314954	Pos1to6	HPKIVSTGPH
127	2000	31	324.8580551	145.601576	23	0.448200603	30.36002732	0.093456286	329.2147944	475.4356635	222.790322	23	0.468602461	46.45499344	0.097710368	481.8118306	Pos1to6	HPKIVKTGPH
128	2000	32	1265.595042	383.9291823	16	0.303358633	95.98229558	0.075839658	1329.172202	1680.799892	552.2818437	16	0.328582746	138.0704609	0.082145686	1765.234865	Pos1to6	HPKIVIEGPH
129	2000	33	7664.461342	2024.499991	15	0.264141197	522.7236499	0.068200964	7817.387127	10283.56012	3110.460339	15	0.302469213	803.117406	0.078097215	10488.74369	Pos1to6	HPKIVIHGPH
130	2000	34	1150.59273	595.9856687	15	0.517981431	153.882838	0.13374223	1062.512854	1483.589685	799.6839409	15	0.539019615	206.4775057	0.139174266	1370.018313	Pos1to6	HPKIVIDGPH
131	2000	35	2518.49161	987.1974368	20	0.391979641	220.7440576	0.087649312	2270.922263	3126.370261	1347.645295	20	0.431057483	301.3426488	0.096387383	2819.046051	Pos1to6	HPKIVIQGPH
132	2000	36	10550.88077	2964.968614	19	0.281016218	680.2104504	0.064469542	10442.20503	12732.17814	3831.958759	19	0.300966474	879.1116307	0.069046444	12601.03469	Pos1to6	HPKIVISGPH
133	2000	37	3168.448342	714.1386335	12	0.225390651	206.1540662	0.065064676	2906.960207	4146.594986	1095.022981	12	0.264077631	316.1059063	0.076232646	3804.381615	Pos1to6	HPKIVIRGPH
134	2000	38	1960.457202	701.6021387	8	0.357876794	248.053815	0.126528554	1742.501201	2690.316845	1015.733022	8	0.377551449	359.115854	0.133484595	2391.217889	Pos1to6	HPKIVIVGPH
135	2000	39	1924.275818	526.2050381	14	0.27345614	140.634212	0.073084228	1868.340684	2294.757861	661.6265214	14	0.288320843	176.8271258	0.077056987	2228.0535	Pos1to6	HPKIVIFGPH
136	2000	40	103.208369	0	1	0	0	0	103.208369	143.5540274	19.60600595	1	0.136575799	19.60600595	0.136575799	143.5540274	Pos1to6	HPKIVIYGPH
137	2000	41	922.152354	369.8502388	15	0.401072813	95.49492103	0.103556555	942.964674	1173.739536	485.1375657	15	0.413326425	125.2619808	0.106720424	1200.229999	Pos1to6	HPKIVIAGPH
138	2000	42	548.4058479	588.8659552	15	1.073777673	152.0445358	0.277248203	380.1722952	740.4585421	801.138005	15	1.081948495	206.8529434	0.2793579	513.3093028	Pos1to6	HPKIVIGGPH
139	2000	43	2069.282298	759.837558	21	0.367198598	165.8101488	0.080129303	1867.577425	2713.773467	1043.690774	21	0.384590234	227.7519987	0.08392447	2449.246325	Pos1to6	HPKIVIIGPH
140	2000	44	1625.813199	1450.736456	16	0.892314355	362.6841139	0.223078589	1120.010975	2344.28663	2120.75981	16	0.904650389	530.1899526	0.226162597	1614.962134	Pos1to6	HPKIVIKGPH
141	2000	45	1421.23407	349.7790136	20	0.246109364	78.21296514	0.055031727	1403.547475	1763.410823	470.3768644	20	0.266742643	105.1794644	0.059645468	1741.465997	Pos1to6	HPKIVILGPH
142	2000	46	1640.447821	484.0270204	18	0.295057858	114.0862628	0.069545804	1573.397289	2465.591062	801.3021485	18	0.324993938	188.8687277	0.076601806	2364.814195	Pos1to6	HPKIVIMGPH
143	2000	47	3700.240406	1254.052161	14	0.338910996	335.1595379	0.090577774	3977.418764	4863.596355	1791.809872	14	0.368412537	478.8813316	0.098462392	5227.919615	Pos1to6	HPKIVINGPH
144	2000	48	443.0272608	264.5963261	12	0.59724615	76.38238004	0.172410113	453.1012348	521.7566258	319.0611866	12	0.611513435	92.10503099	0.176528723	533.6208228	Pos1to6	G
145	250	1	275.5456231	0	1	0	0	0	275.5456231	338.8045917	35.1253656	1	0.103674408	35.1253656	0.103674408	338.8045917	Pos1to6	HPKYVITGPH
146	250	2	318.0743819	94.99817271	14	0.298666533	25.38932962	0.079821988	286.6631159	506.9970373	172.9304362	14	0.341087666	46.21760316	0.091159513	456.9288152	Pos1to6	HPKVVITGPH
147	250	3	33.81140666	27.29875008	13	0.807382856	7.571311013	0.223927714	29.68075095	42.59654499	34.66356453	13	0.813764697	9.613943023	0.225697719	37.39263073	Pos1to6	HPKTVITGPH
148	250	4	232.6760183	610.9681534	10	2.625832081	193.2050942	0.830361013	31.68725723	294.1093375	772.9616853	10	2.628143982	244.431947	0.8310921	40.05362607	Pos1to6	HPKMVITGPH
149	250	5	3694.298274	1272.019349	16	0.344319612	318.0048371	0.086079903	3740.479237	4571.321896	1638.540334	16	0.358439062	409.6350835	0.089609766	4628.466184	Pos1to6	HPKIVITGPH
150	250	6	-43.22131887	14.63707355	17	-0.338654024	3.550011783	-0.082135665	-41.71938298	-57.50011024	20.68226576	17	-0.359690889	5.016186254	-0.087237855	-55.50198798	Pos1to6	Scrambled
151	250	7	3115.221234	976.0502213	22	0.313316502	208.0946064	0.066799303	2900.794126	4119.336311	1401.543163	22	0.340235188	298.8100063	0.072538386	3835.79389	Pos1to6	HPKIFITGPH
152	250	8	2110.113759	460.7914365	15	0.218372794	118.9758373	0.056383613	2199.833324	3321.605515	829.9935384	15	0.249877216	214.3034101	0.06451802	3462.83629	Pos1to6	HPKIYITGPH
153	250	9	3374.101254	1151.283893	16	0.341212017	287.8209734	0.085303004	3287.632522	4592.786215	1664.696176	16	0.362458886	416.1740439	0.090614722	4475.086012	Pos1to6	HPKIRITGPH
154	250	10	261.2382722	84.99376937	21	0.325349608	18.54716104	0.070997105	242.4816884	359.4396212	125.083973	21	0.347997176	27.29556069	0.075939209	333.6323024	Pos1to6	HPKIMITGPH
155	250	11	36.63579644	25.90382743	20	0.707063308	5.792271902	0.158104162	33.46387644	49.3484769	35.27980785	20	0.714911788	7.888804859	0.159859136	45.07589555	Pos1to6	HPKIGITGPH
156	250	12	4384.658476	1404.333686	16	0.320283482	351.0834215	0.080070871	4169.086129	6845.135555	2453.375603	16	0.358411544	613.3439007	0.089602886	6508.593508	Pos1to6	HPKIIITGPH
157	250	13	355.9481998	123.4562243	28	0.346837614	23.33103339	0.065546148	344.8576155	466.0059663	173.5357654	28	0.372389578	32.79517705	0.070375015	451.4862175	Pos1to6	HPKIQITGPH
158	250	14	2604.709456	790.0131547	23	0.303301834	164.72913	0.063242804	2314.657635	3419.829862	1106.191646	23	0.323463941	230.6569029	0.067446894	3039.008931	Pos1to6	HPKILITGPH
159	250	15	140.3119193	55.93124341	17	0.398620756	13.56531908	0.096679734	146.1036398	184.4016812	77.6465797	17	0.421073057	18.83206174	0.102125217	192.0133153	Pos1to6	HPKIEITGPH
160	250	16	412.5128877	113.8405174	11	0.27596839	34.32420746	0.0832076	393.5466292	546.3643822	166.1816596	11	0.304159028	50.10565562	0.091707398	521.2439838	Pos1to6	HPKISITGPH
161	250	17	1394.706972	832.4666453	12	0.59687566	240.3124209	0.172303162	973.1073134	1804.309644	1099.177111	12	0.609195387	317.3051005	0.17585956	1258.893047	Pos1to6	HPKIKITGPH
162	250	18	57.89996231	27.01624395	14	0.466602099	7.220394909	0.124704656	53.13294529	75.1489124	36.22860006	14	0.48209081	9.682500644	0.128844189	68.96175562	Pos1to6	HPKIAITGPH
163	250	19	598.4301011	190.2514973	10	0.31791766	60.16280598	0.100534391	514.6943421	797.6695085	270.5456071	10	0.33917005	85.55403293	0.107254987	686.0550333	Pos1to6	HPKIHITGPH
164	250	20	-2.908202072	28.22961824	18	-9.706897093	6.65378483	-2.287937586	-5.917055364	-4.204989953	40.82184666	18	-9.707953435	9.621801531	-2.288186568	-8.555512217	Pos1to6	HPKIVDTGPH
165	250	21	88.10754694	22.91078781	5	0.26003207	10.24601579	0.116289877	100.2006774	109.4575986	31.95820299	5	0.291968793	14.29214286	0.130572414	124.4811132	Pos1to6	HPKIVRTGPH
166	250	22	-2.864870016	17.03494658	15	-5.946149907	4.398404293	-1.535289304	-5.16022657	-3.865235284	22.98822007	15	-5.947430978	5.935532899	-1.535620075	-6.962092418	Pos1to6	HPKIVQTGPH
167	250	23	0.06725854	19.08519214	13	283.7586432	5.293279912	78.70048753	-1.832969978	0.096394529	27.35278424	13	283.7586795	7.586297392	78.7004976	-2.62700137	Pos1to6	HPKIVETGPH
168	250	24	2361.693482	644.997861	21	0.273108202	140.7500724	0.059597096	2314.071902	3333.963857	1034.156711	21	0.310188339	225.6714956	0.067688645	3266.737255	Pos1to6	HPKIVVTGPH
169	250	25	718.9215624	244.5567612	16	0.340171688	61.13919031	0.085042922	740.6999775	974.1730553	351.2390122	16	0.360550941	87.80975305	0.090137735	1003.683848	Pos1to6	HPKIVLTGPH
170	250	26	18.99265746	30.83492932	12	1.623518425	8.901277372	0.4686694	12.22237722	23.68524545	38.59448534	12	1.629473733	11.14126825	0.470388549	15.24220637	Pos1to6	HPKIVHTGPH
171	250	27	-9.244617455	19.00274068	5	-2.055546459	8.498283983	-0.919268323	-2.511456131	-11.80049682	24.29288785	5	-2.058632634	10.86410972	-0.920648502	-3.205803834	Pos1to6	HPKIVATGPH
172	250	28	15.94645352	36.05671598	12	2.26111191	10.40867734	0.652726785	4.168305446	21.9627648	49.75173611	12	2.265276552	14.36208912	0.653929013	5.740932427	Pos1to6	HPKIVGTGPH
173	250	29	38.64592559	49.68575752	5	1.285666128	22.22014626	0.574967372	44.35454215	47.70330432	61.58797863	5	1.291063156	27.54298136	0.577380996	54.74983948	Pos1to6	HPKIVYTGPH
174	250	30	16.91628924	20.56285187	9	1.215565162	6.854283957	0.405188387	10.29837706	21.19654774	26.0066962	9	1.226930749	8.668898734	0.408976916	12.9041327	Pos1to6	HPKIVSTGPH
175	250	31	20.22827218	25.66039131	10	1.268540935	8.11452822	0.401147866	22.94063699	29.60444371	37.77207516	10	1.275892077	11.94457895	0.403472501	33.57403887	Pos1to6	HPKIVKTGPH
176	250	32	138.6452385	68.44497409	14	0.49366985	18.29268878	0.131938817	137.773365	184.1307007	93.82540274	14	0.509558712	25.07589366	0.136185294	182.9727909	Pos1to6	HPKIVIEGPH
177	250	33	2413.598887	631.4681122	7	0.261629269	238.6725123	0.098886569	2248.433852	3238.3736	972.4126184	7	0.300278084	367.5374229	0.113494448	3016.76839	Pos1to6	HPKIVIHGPH
178	250	34	65.09524383	45.82508689	12	0.703969817	13.22856312	0.203218582	60.48263858	83.93467977	60.39862139	12	0.719590776	17.43558016	0.207727964	77.98712475	Pos1to6	HPKIVIDGPH
179	250	35	264.8185469	66.00119946	6	0.249231786	26.94487685	0.101748451	261.4228277	328.7367829	100.9382519	6	0.307048852	41.20786879	0.125352169	324.521452	Pos1to6	HPKIVIQGPH
180	250	36	2705.284934	962.4241919	14	0.355757052	257.2186848	0.095080071	2420.308099	3264.577663	1213.500136	14	0.371717343	324.3215533	0.099345639	2920.684494	Pos1to6	HPKIVISGPH
181	250	37	460.5172785	71.65571585	5	0.155598322	32.04541033	0.069585685	461.6410818	602.6857415	125.188851	5	0.207718289	55.98615618	0.092894443	604.1564795	Pos1to6	HPKIVIRGPH
182	250	38	227.1682128	96.81523341	21	0.426183013	21.12681598	0.093000758	215.0419365	311.7407862	138.0491749	21	0.442833216	30.1247997	0.09663413	295.1000122	Pos1to6	HPKIVIVGPH
183	250	39	364.1776319	166.6077023	10	0.457490213	52.68598151	0.144671108	316.118703	434.2929823	202.6096354	10	0.466527537	64.07079236	0.147528961	376.9812373	Pos1to6	HPKIVIFGPH
184	250	40	NA	NA	0	NA	NA	NA	NA	NA	NA	0	NA	NA	NA	NA	Pos1to6	HPKIVIYGPH
185	250	41	87.5081591	41.08924018	17	0.469547533	9.96560455	0.113882004	81.12327116	111.3826642	53.46996893	17	0.480056473	12.96837233	0.116430797	103.2558126	Pos1to6	HPKIVIAGPH
186	250	42	29.08112677	56.6714151	6	1.94873519	23.13600833	0.79556781	12.56574434	39.26538861	76.69509349	6	1.953249317	31.3106408	0.797410695	16.96629015	Pos1to6	HPKIVIGGPH
187	250	43	353.5949053	98.15806056	10	0.277600325	31.04030421	0.087784931	342.6581128	463.7242936	139.2229606	10	0.300227878	44.0261658	0.094940391	449.3811673	Pos1to6	HPKIVIIGPH
188	250	44	176.2671302	53.18766549	12	0.301744661	15.35395649	0.087106181	169.4797893	254.1624566	85.52000482	12	0.336477724	24.6874989	0.097132752	244.3756788	Pos1to6	HPKIVIKGPH
189	250	45	208.0533645	81.89424178	14	0.393621329	21.88715676	0.105199725	203.3571126	258.1443567	105.0236986	14	0.406840963	28.06876412	0.108732821	252.3174337	Pos1to6	HPKIVILGPH
190	250	46	229.1050417	144.3292742	10	0.629969874	45.64092396	0.199213966	184.2253965	344.3445967	221.9417695	10	0.644533911	70.18414994	0.203819519	276.8905449	Pos1to6	HPKIVIMGPH
191	250	47	655.1988342	253.2307261	6	0.38649447	103.381011	0.157785707	688.0932732	861.1934122	355.3350283	6	0.412607694	145.0649179	0.168446386	904.4298661	Pos1to6	HPKIVINGPH
192	250	48	32.31636786	92.45577459	8	2.860958106	32.68805259	1.011501439	-6.120703932	38.05923595	109.0005289	8	2.863970496	38.53750656	1.012566479	-7.208400281	Pos1to6	G
193	500	1	NA	NA	0	NA	NA	NA	NA	NA	NA	0	NA	NA	NA	NA	Pos1to6	HPKYVITGPH
194	500	2	797.2892624	241.0449561	13	0.302330619	66.85384222	0.083851427	777.7147633	1270.845176	437.5527537	13	0.344300598	121.3552992	0.095491805	1239.644257	Pos1to6	HPKVVITGPH
195	500	3	120.8213311	68.12460651	22	0.563845853	14.52421491	0.12021234	108.8756297	152.2140536	87.21055708	22	0.572946814	18.59335324	0.122152671	137.1645287	Pos1to6	HPKTVITGPH
196	500	4	138.5633219	92.77529351	17	0.669551597	22.5013138	0.162390115	108.6012332	175.1481184	118.848809	17	0.678561723	28.82507018	0.164575392	137.2751562	Pos1to6	HPKMVITGPH
197	500	5	5928.935847	1122.944362	23	0.18940066	234.1500857	0.039492768	5750.585176	7336.460742	1569.988477	23	0.213998075	327.3652273	0.044621683	7115.769755	Pos1to6	HPKIVITGPH
198	500	6	-6.058851356	31.49797978	21	-5.198671815	6.873422694	-1.134443196	-18.38493284	-8.060481032	41.91518311	21	-5.200084579	9.146642827	-1.134751486	-24.45866282	Pos1to6	Scrambled
199	500	7	4921.211563	1249.903936	24	0.253982972	255.1355726	0.051844057	4978.139881	6507.443279	1864.585231	24	0.286531154	380.6068664	0.058487927	6582.721043	Pos1to6	HPKIFITGPH
200	500	8	3975.943961	1008.732298	18	0.253708882	237.7604827	0.059799757	4182.905804	6258.675549	1760.459221	18	0.28128303	414.9442178	0.066299046	6584.461585	Pos1to6	HPKIYITGPH
201	500	9	5247.23228	2001.819828	27	0.381500136	385.2504056	0.073419735	4975.371372	7142.469732	2861.387459	27	0.400615973	550.6742732	0.07709858	6772.41592	Pos1to6	HPKIRITGPH
202	500	10	544.7424237	177.1548534	16	0.325208476	44.28871335	0.081302119	582.3557771	749.5150264	260.7302187	16	0.347865232	65.18255468	0.086966308	801.2675103	Pos1to6	HPKIMITGPH
203	500	11	127.7506128	63.55714836	27	0.497509538	12.2315789	0.095745755	110.0587134	172.0802815	87.52039032	27	0.508602087	16.84330697	0.097880517	148.2492644	Pos1to6	HPKIGITGPH
204	500	12	7352.186555	1989.681607	21	0.270624472	434.1841226	0.059055101	7452.053854	11477.9096	3613.535625	21	0.314825238	788.5381203	0.068700499	11633.81802	Pos1to6	HPKIIITGPH
205	500	13	732.132158	302.1564851	26	0.412707572	59.25776206	0.080938614	612.5456067	958.5045068	416.3763959	26	0.434402126	81.65812953	0.085193266	801.9422699	Pos1to6	HPKIQITGPH
206	500	14	5231.851713	1260.353708	12	0.24090012	363.8327763	0.069541875	4957.183465	6869.112666	1826.07046	12	0.265837896	527.1411357	0.07674079	6508.48946	Pos1to6	HPKILITGPH
207	500	15	377.3139933	189.2086745	12	0.501462119	54.61983958	0.144759645	360.8111807	495.8761526	257.601943	12	0.519488468	74.36327556	0.149963404	474.1877143	Pos1to6	HPKIEITGPH
208	500	16	987.712511	239.0632443	15	0.242037275	61.72586426	0.062493756	939.3601028	1308.203821	358.1139673	15	0.27374478	92.46462877	0.070680598	1244.162104	Pos1to6	HPKISITGPH
209	500	17	3024.850909	872.7790378	16	0.288536217	218.1947595	0.072134054	3038.349359	3913.200244	1225.722847	16	0.313227735	306.4307119	0.078306934	3930.662969	Pos1to6	HPKIKITGPH
210	500	18	205.4440323	56.78251258	22	0.276389204	12.10607236	0.058926376	189.7545232	266.6477657	80.47508315	22	0.301802953	17.15734538	0.064344606	246.2842025	Pos1to6	HPKIAITGPH
211	500	19	1167.656444	635.2663512	21	0.544052452	138.6264829	0.118721978	1055.534078	1556.412252	866.5146192	21	0.556738498	189.0889921	0.1214903	1406.960224	Pos1to6	HPKIHITGPH
212	500	20	49.63269801	55.57427649	14	1.119710971	14.85285015	0.299255345	34.58229502	71.76426922	81.00979405	14	1.128831868	21.65077817	0.301693007	50.00278506	Pos1to6	HPKIVDTGPH
213	500	21	316.9693111	380.1172811	25	1.19922424	76.02345622	0.239844848	217.2257016	393.7767061	475.1120964	25	1.206552061	95.02241927	0.241310412	269.8634166	Pos1to6	HPKIVRTGPH
214	500	22	68.79871124	60.76069453	14	0.883166173	16.23897868	0.236036088	67.24392554	92.82208432	82.77414307	14	0.891750532	22.12232028	0.238330355	90.72439316	Pos1to6	HPKIVQTGPH
215	500	23	62.73226587	54.34183041	19	0.866250081	12.4668709	0.198731398	51.72744773	89.90750006	78.94469287	19	0.87806571	18.11115465	0.201442089	74.13546196	Pos1to6	HPKIVETGPH
216	500	24	4928.803263	1442.074218	30	0.292581006	263.2855262	0.053417739	4839.862551	6957.910524	2278.461912	30	0.327463526	415.9883286	0.059786387	6832.354385	Pos1to6	HPKIVVTGPH
217	500	25	1494.022146	860.7800986	27	0.576149491	165.6572072	0.110880021	1410.433999	2024.471367	1191.22283	27	0.588411795	229.2509406	0.113239903	1911.205436	Pos1to6	HPKIVLTGPH
218	500	26	113.261559	55.94582025	23	0.493952412	11.66550993	0.102996198	122.6138076	141.2455225	72.4854568	23	0.513187643	15.11426255	0.107007021	152.9084667	Pos1to6	HPKIVHTGPH
219	500	27	40.59995951	32.87385781	17	0.809701739	7.973081652	0.196381517	37.77129723	51.82471806	42.36695202	17	0.817504728	10.27549519	0.19827402	48.2140094	Pos1to6	HPKIVATGPH
220	500	28	34.29346525	30.880261	14	0.90047071	8.253096906	0.24066092	26.19062724	47.23177542	43.0223736	14	0.910877756	11.498213	0.24344232	36.07188176	Pos1to6	HPKIVGTGPH
221	500	29	119.7439544	67.88599287	6	0.566926265	27.71434053	0.231446679	101.430534	147.8081379	85.58998284	6	0.57906137	34.94196418	0.236400814	125.2026328	Pos1to6	HPKIVYTGPH
222	500	30	71.34383723	52.14488267	16	0.730895403	13.03622067	0.182723851	56.8412618	89.39567245	67.0150704	16	0.749645576	16.7537676	0.187411394	71.2235705	Pos1to6	HPKIVSTGPH
223	500	31	88.33879728	52.60094471	17	0.595445561	12.757603	0.144416761	74.6565056	129.2854342	78.98693602	17	0.61095	19.1571459	0.14817714	109.2611518	Pos1to6	HPKIVKTGPH
224	500	32	373.9602737	150.5938019	17	0.402699999	36.52436188	0.097669096	347.8103827	496.6457412	209.5983012	17	0.422027783	50.83505499	0.102356772	461.9168331	Pos1to6	HPKIVIEGPH
225	500	33	3340.008099	1610.018712	18	0.482040362	379.4850497	0.113618003	3261.064753	4481.355252	2258.887397	18	0.504063452	532.4248655	0.118808895	4375.435397	Pos1to6	HPKIVIHGPH
226	500	34	183.939994	83.01543755	10	0.45131804	26.25178636	0.142719296	165.2832724	237.1746933	112.7329404	10	0.475316059	35.6492859	0.150308135	213.1184664	Pos1to6	HPKIVIDGPH
227	500	35	741.6873512	319.1671221	18	0.430325691	75.22841212	0.101428738	670.6174717	920.7055798	429.2332129	18	0.466200295	101.1712385	0.109884463	832.4818363	Pos1to6	HPKIVIQGPH
228	500	36	4296.219806	1631.964206	10	0.379860501	516.0723951	0.120122437	3865.8281	5184.423659	2047.057739	10	0.394847696	647.3364957	0.124861805	4665.052434	Pos1to6	HPKIVISGPH
229	500	37	1135.607359	251.9976209	13	0.22190559	69.89156488	0.061545537	1073.176461	1486.186067	388.0572144	13	0.261109442	107.6277065	0.072418729	1404.481833	Pos1to6	HPKIVIRGPH
230	500	38	440.5649438	142.280608	12	0.322950362	41.07287368	0.093227739	426.3400163	604.5830984	208.3543119	12	0.344624771	60.14670904	0.099484602	585.0623652	Pos1to6	HPKIVIVGPH
231	500	39	624.5147535	313.7218973	12	0.502345054	90.56371093	0.145014526	631.5491311	744.752975	380.2627306	12	0.510589072	109.7723949	0.147394369	753.1416858	Pos1to6	HPKIVIFGPH
232	500	40	NA	NA	0	NA	NA	NA	NA	NA	NA	0	NA	NA	NA	NA	Pos1to6	HPKIVIYGPH
233	500	41	218.846634	78.52295765	18	0.358803589	18.50803861	0.084570817	222.585264	278.5536961	103.7474529	18	0.372450462	24.45350917	0.087787416	283.3123218	Pos1to6	HPKIVIAGPH
234	500	42	107.7476366	49.2850996	21	0.457412349	10.75489045	0.099815558	88.13048128	145.4810488	69.28932799	21	0.476277347	15.12017097	0.103932238	118.9939311	Pos1to6	HPKIVIGGPH
235	500	43	876.7346178	330.2677002	13	0.376702019	91.59977905	0.104478342	854.4543055	1149.799206	452.6460975	13	0.393674039	125.5414396	0.109185533	1120.579548	Pos1to6	HPKIVIIGPH
236	500	44	371.2724912	104.4810724	16	0.281413449	26.12026811	0.070353362	352.9001134	535.3438744	170.4386825	16	0.318372341	42.60967062	0.079593085	508.8524426	Pos1to6	HPKIVIKGPH
237	500	45	349.2526761	184.4649827	16	0.528170563	46.11624568	0.132042641	364.2226301	433.3388581	233.1773656	16	0.538094753	58.29434139	0.134523688	451.9129828	Pos1to6	HPKIVILGPH
238	500	46	392.8080882	165.606457	13	0.421596352	45.9309671	0.11692979	337.4573237	590.3900747	261.5803855	13	0.443063657	72.54934557	0.122883749	507.1979436	Pos1to6	HPKIVIMGPH
239	500	47	1067.412901	389.3021793	21	0.36471564	84.95270023	0.079587477	1089.385332	1403.007623	550.3736791	21	0.392281318	120.1013831	0.085602802	1431.888187	Pos1to6	HPKIVINGPH
240	500	48	44.07713712	76.80719102	6	1.742563062	31.35640443	0.711398391	44.59583788	51.90998472	90.71292839	6	1.747504433	37.03339794	0.713415697	52.52086261	Pos1to6	G
241	63	1	1187.623615	0	1	0	0	0	1187.623615	1460.274816	151.3931276	1	0.103674408	151.3931276	0.103674408	1460.274816	Pos1to6	HPKYVITGPH
242	63	2	18.6450339	43.49782978	13	2.332944527	12.06412736	0.647042393	9.214490886	29.71939108	69.50633835	13	2.338753785	19.27758976	0.648653592	14.68750659	Pos1to6	HPKVVITGPH
243	63	3	-25.55886825	10.3127022	11	-0.403488218	3.109396708	-0.121656275	-25.97251007	-32.19976892	13.39868901	11	-0.416111341	4.03985674	-0.12546229	-32.72088632	Pos1to6	HPKTVITGPH
244	63	4	-26.16056256	17.20876486	14	-0.657813257	4.599235869	-0.175807988	-29.87741759	-33.06772129	22.05557397	14	-0.666981972	5.894600089	-0.17825843	-37.76593547	Pos1to6	HPKMVITGPH
245	63	5	800.1355996	173.2565017	16	0.216533925	43.31412543	0.054133481	800.8103047	990.087187	235.9847559	16	0.23834745	58.99618896	0.059586862	990.9220665	Pos1to6	HPKIVITGPH
246	63	6	-44.57763998	7.474995869	18	-0.167684872	1.761873423	-0.039523703	-43.90536169	-59.30451175	12.27033194	18	-0.206903852	2.892144973	-0.048767706	-58.41013655	Pos1to6	Scrambled
247	63	7	682.4029749	299.4285398	21	0.438785514	65.34066423	0.095750849	663.9977377	902.3588188	413.6362816	21	0.458394458	90.2628367	0.100029872	878.0211053	Pos1to6	HPKIFITGPH
248	63	8	501.9062942	109.2877523	15	0.217745331	28.21797632	0.056221603	500.2001196	790.0686433	196.9870645	15	0.24932905	50.86184135	0.064376484	787.3828929	Pos1to6	HPKIYITGPH
249	63	9	614.9347552	271.7244989	19	0.441875332	62.33787532	0.101373153	539.7074236	837.0418236	383.7675762	19	0.458480766	88.04232013	0.105182701	734.6432808	Pos1to6	HPKIRITGPH
250	63	10	-4.201744343	22.02842693	19	-5.242686164	5.05366773	-1.202754694	-9.083108479	-5.78121032	30.31747824	19	-5.244140338	6.955306519	-1.203088304	-12.49751441	Pos1to6	HPKIMITGPH
251	63	11	-6.336062295	36.99960461	18	-5.839526648	8.720890441	-1.376389631	-14.56505748	-8.534686132	49.84668206	18	-5.840482156	11.74897563	-1.376614846	-19.61915591	Pos1to6	HPKIGITGPH
252	63	12	1076.379682	331.705935	14	0.30816815	88.65214014	0.082361402	1097.913343	1680.396518	584.1521743	14	0.34762758	156.1212356	0.092907379	1714.01392	Pos1to6	HPKIIITGPH
253	63	13	24.96531294	20.77281769	22	0.832067186	4.428779613	0.17739732	26.10680099	32.68448832	27.55427344	22	0.843038238	5.874590835	0.179736356	34.17891994	Pos1to6	HPKIQITGPH
254	63	14	595.4889534	193.190242	13	0.324422881	53.58133258	0.089978718	558.5809503	781.8418673	268.4430169	13	0.343346945	74.45269706	0.095227309	733.3838365	Pos1to6	HPKILITGPH
255	63	15	-2.229740642	11.96143569	13	-5.364496419	3.317505362	-1.487843608	-5.215575718	-2.930384852	15.72506489	13	-5.366211498	4.36134829	-1.488319286	-6.854449255	Pos1to6	HPKIEITGPH
256	63	16	24.70085524	33.61539253	9	1.360899945	11.20513084	0.453633315	30.60236846	32.7157476	44.71900235	9	1.366895322	14.90633412	0.455631774	40.53217399	Pos1to6	HPKISITGPH
257	63	17	228.6394398	100.0128233	17	0.437425946	24.2566726	0.106091375	199.6305464	295.787111	134.3146843	17	0.454092417	32.57609591	0.110133588	258.2587792	Pos1to6	HPKIKITGPH
258	63	18	-21.82012517	17.46171147	17	-0.800257163	4.235087105	-0.194090871	-24.49854811	-28.32054822	22.92225281	17	-0.809385914	5.559462912	-0.196304919	-31.79689886	Pos1to6	HPKIAITGPH
259	63	19	66.21690849	45.17839638	19	0.682278853	10.36463496	0.156525504	54.56190386	88.26295461	61.11654307	19	0.692437086	14.02109658	0.158855962	72.72756994	Pos1to6	HPKIHITGPH
260	63	20	-31.85796352	12.68016795	17	-0.398021924	3.075392459	-0.096534496	-31.93536323	-46.06365487	19.48499018	17	-0.423001393	4.725804272	-0.102592907	-46.17556765	Pos1to6	HPKIVDTGPH
261	63	21	3.22163084	19.30886162	15	5.993505332	4.985526632	1.547516422	-1.98727183	4.002290241	23.99363328	15	5.994975835	6.195129474	1.547896105	-2.468823725	Pos1to6	HPKIVRTGPH
262	63	22	-30.50596857	8.723888374	16	-0.285973165	2.180972093	-0.071493291	-32.51934123	-41.15814869	12.81976718	16	-0.311475797	3.204941796	-0.077868949	-43.87455781	Pos1to6	HPKIVQTGPH
263	63	23	-27.08924693	13.74453626	14	-0.507379784	3.673381831	-0.135602951	-21.78242935	-38.82414314	20.47193913	14	-0.527299187	5.471355876	-0.140926636	-31.21844463	Pos1to6	HPKIVETGPH
264	63	24	482.4943967	156.1406338	12	0.323611289	45.07391847	0.093418532	432.5358198	681.1294065	242.1153802	12	0.355461646	69.89268997	0.102612939	610.6037049	Pos1to6	HPKIVVTGPH
265	63	25	51.25565119	38.8235429	17	0.757449023	9.416092244	0.183708372	41.76269698	69.45385552	53.25843855	17	0.766817596	12.91706868	0.185980585	56.59044915	Pos1to6	HPKIVLTGPH
266	63	26	-15.15486448	17.67844325	19	-1.166519389	4.055713032	-0.267617902	-18.74289179	-18.89923439	22.20270004	19	-1.174793623	5.093648724	-0.269516141	-23.37376924	Pos1to6	HPKIVHTGPH
267	63	27	-33.04955647	12.20848535	9	-0.36939937	4.069495115	-0.123133123	-31.77492342	-42.18683876	16.29269524	9	-0.386203274	5.430898414	-0.128734425	-40.55980516	Pos1to6	HPKIVATGPH
268	63	28	-37.46591464	10.83074873	17	-0.289082726	2.626842414	-0.07011286	-34.91950564	-51.60113312	16.51394358	17	-0.320030638	4.005219627	-0.077618831	-48.09400963	Pos1to6	HPKIVGTGPH
269	63	29	-20.86473327	12.42792447	5	-0.595642624	5.557936787	-0.266379479	-25.2311392	-25.75476471	15.63839865	5	-0.607204097	6.993704489	-0.271549927	-31.14451765	Pos1to6	HPKIVYTGPH
270	63	30	-28.18010473	10.15769669	14	-0.360456314	2.714758633	-0.096336002	-28.63706994	-35.31039975	14.02179285	14	-0.397100938	3.747481771	-0.10612969	-35.88298897	Pos1to6	HPKIVSTGPH
271	63	31	-22.33846522	16.93659294	19	-0.758180688	3.885520898	-0.173938579	-27.66580945	-32.69274955	25.18705191	19	-0.770417057	5.778305998	-0.176745795	-40.48941458	Pos1to6	HPKIVKTGPH
272	63	32	-12.28237964	14.0942669	8	-1.147519236	4.98307585	-0.405709316	-18.31965856	-16.31187046	18.83113821	8	-1.15444383	6.657812762	-0.40815753	-24.32980465	Pos1to6	HPKIVIEGPH
273	63	33	437.7781697	179.167037	10	0.409264439	56.65759186	0.129420779	378.9800405	587.3756716	255.5012835	10	0.434987855	80.79660011	0.137555238	508.485053	Pos1to6	HPKIVIHGPH
274	63	34	-27.1062453	18.70886314	14	-0.690204893	5.000153997	-0.184465017	-19.11832455	-34.95115595	24.6800746	14	-0.706130425	6.596027388	-0.188721294	-24.6514239	Pos1to6	HPKIVIDGPH
275	63	35	20.82347112	21.64600561	18	1.039500354	5.10201245	0.245012583	11.14866235	25.8495524	27.26758388	18	1.0548571	6.427031156	0.248632203	13.83957218	Pos1to6	HPKIVIQGPH
276	63	36	497.9637545	233.3655128	16	0.468639556	58.34137821	0.117159889	531.5082357	600.9131717	288.9597298	16	0.480867692	72.23993245	0.120216923	641.3926653	Pos1to6	HPKIVISGPH
277	63	37	130.7524947	55.08881886	14	0.42132136	14.72310615	0.11260287	135.3049437	171.1177145	75.84352112	14	0.443224253	20.27003365	0.118456664	177.0755715	Pos1to6	HPKIVIRGPH
278	63	38	13.05081886	21.86666681	12	1.675501517	6.312362983	0.483675626	12.81828745	17.90951508	30.0846518	12	1.679813868	8.684690908	0.484920494	17.59041442	Pos1to6	HPKIVIVGPH
279	63	39	30.45201028	48.60302643	12	1.596053133	14.0304852	0.460740853	12.6402401	36.31495513	58.05552123	12	1.598667024	16.75918541	0.461495418	15.07387354	Pos1to6	HPKIVIFGPH
280	63	40	-41.09121563	0	1	0	0	0	-41.09121563	-57.15437184	7.805903981	1	-0.136575799	7.805903981	-0.136575799	-57.15437184	Pos1to6	HPKIVIYGPH
281	63	41	-2.451630489	18.86780774	14	-7.696024267	5.042633729	-2.056849003	-6.433406323	-3.120499145	24.01746022	14	-7.696672583	6.418936245	-2.057022273	-8.18860714	Pos1to6	HPKIVIAGPH
282	63	42	-23.01230167	15.97794791	17	-0.694322026	3.875221584	-0.168397826	-22.08527925	-31.07125027	21.96403648	17	-0.706892587	5.327061317	-0.171446635	-29.81958296	Pos1to6	HPKIVIGGPH
283	63	43	30.10934309	18.25150289	16	0.606174065	4.562875723	0.151543516	29.35076482	39.48709001	24.3581848	16	0.616864519	6.089546201	0.15421613	38.49224771	Pos1to6	HPKIVIIGPH
284	63	44	20.04531177	25.10221628	14	1.252273677	6.708849497	0.334684218	11.48700124	28.90366274	36.45022079	14	1.261093486	9.741731276	0.337041411	16.56329486	Pos1to6	HPKIVIKGPH
285	63	45	3.16435047	16.79407765	21	5.307274844	3.664768193	1.158142319	1.046661849	3.926200465	20.84133869	21	5.308271667	4.547952959	1.158359844	1.298656479	Pos1to6	HPKIVILGPH
286	63	46	5.519498279	46.46684789	15	8.418672411	11.99768853	2.17369187	-4.122126131	8.295799142	69.84876027	15	8.419774765	18.03487235	2.173976496	-6.195550518	Pos1to6	HPKIVIMGPH
287	63	47	60.69499648	47.22975827	16	0.778149123	11.80743957	0.194537281	61.15764767	79.77750935	63.13941027	16	0.791443739	15.78485257	0.197860935	80.38561812	Pos1to6	HPKIVINGPH
288	63	48	-5.064309415	37.7724871	5	-7.458566213	16.89236977	-3.335572213	-19.17927638	-5.964276302	44.49184448	5	-7.459722225	19.89735774	-3.336089198	-22.58758188	Pos1to6	G
