# Supplementary material for: Quantitative mapping of protein-peptide affinity landscapes using spectrally encoded beads
Source: eLife journal article supplement (doi:10.7554/elife.40499), 2019-07-08
Supplement: supp [file elife-40499-supp-v1.zip › elife_poa_e40499_Figure_3_source_data_4.csv]

	conc	code	AVG	SD	N	CV	SEM	RSEM	MED	AVG_NORM	SD_NORM	N_NORM	CV_NORM	SEM_NORM	RSEM_NORM	MED_NORM	library	sequence
1	1000	1	6141.855593	1296.570898	23	0.2111041	270.353721	0.044018248	5743.568852	9288.226339	2477.362304	23	0.266720708	516.5657491	0.055615112	8685.903907	Flank	HPKIVITGPH
2	1000	2	142.0549377	80.37727822	55	0.565818264	10.83806998	0.076294919	118.9749512	181.2785746	104.6866454	55	0.577490449	14.11594438	0.077868796	151.8258353	Flank	Scrambled
3	1000	3	7407.090359	1897.816475	49	0.256216191	271.1166393	0.036602313	7514.362358	9493.158483	2726.189743	49	0.287174153	389.4556775	0.041024879	9630.641629	Flank	FPKIVITGPH
4	1000	4	8027.827851	1380.432678	42	0.171955939	213.0053866	0.026533377	7983.795166	9820.900709	1949.645542	42	0.198520034	300.8368383	0.030632306	9767.033008	Flank	YPKIVITGPH
5	1000	5	24177.74105	4191.426983	46	0.173358916	617.9921935	0.025560378	23561.48551	29499.45508	6053.396605	46	0.205203675	892.5246368	0.030255631	28747.55677	Flank	IPKIVITGPH
6	1000	6	22043.1326	3395.982449	48	0.154060791	490.1678453	0.02223676	22101.37555	29215.40736	5734.261763	48	0.196275263	827.6693932	0.028329894	29292.60109	Flank	VPKIVITGPH
7	1000	7	10996.30251	3090.968189	43	0.281091593	471.3682297	0.042866066	9865.605081	16271.23795	5086.778443	43	0.312623936	775.7264402	0.047674703	14598.14402	Flank	TPKIVITGPH
8	1000	8	4736.268665	949.7103237	40	0.200518676	150.162387	0.031704787	4507.323557	6317.061289	1521.877485	40	0.240915422	240.6299586	0.038092073	6011.702707	Flank	QPKIVITGPH
9	1000	9	9276.215314	2016.354192	58	0.217368196	264.7602763	0.028541842	9359.025218	11862.98543	2882.850207	58	0.243012202	378.5367771	0.031909065	11968.88775	Flank	APKIVITGPH
10	1000	10	3076.55429	953.6068215	46	0.309959367	140.6016552	0.045701015	3041.145373	3903.828416	1290.233092	46	0.33050456	190.234491	0.048730239	3858.898171	Flank	GPKIVITGPH
11	1000	11	10245.11382	2557.437619	38	0.249625106	414.871165	0.040494539	9575.784038	12791.16056	3599.625787	38	0.281415105	583.9364108	0.045651558	11955.49345	Flank	NPKIVITGPH
12	1000	12	285.8797662	152.151968	54	0.532223634	20.70526027	0.072426463	254.7211167	371.238682	203.053992	54	0.546963455	27.63214837	0.074432298	330.776581	Flank	EPKIVITGPH
13	1000	13	9181.260888	3616.522944	37	0.393902644	594.5527095	0.064757196	9157.173962	13572.99131	5721.875288	37	0.421563321	940.6705028	0.069304583	13537.38273	Flank	RPKIVITGPH
14	1000	14	2781.848504	636.8375434	40	0.228926033	100.6928568	0.036196384	2829.545021	4263.753623	1154.579209	40	0.270789382	182.5550019	0.042815561	4336.858322	Flank	HPKIVITHPH
15	1000	15	4045.637746	676.7236822	36	0.167272436	112.7872804	0.027878739	4034.119747	5123.787568	1086.233365	36	0.211998127	181.0388942	0.035333021	5109.200058	Flank	HPKIVITSPH
16	1000	16	2842.378009	665.8631987	44	0.234262718	100.3826542	0.035316434	2951.223404	3899.141429	1025.318587	44	0.262960092	154.5725929	0.039642725	4048.454289	Flank	HPKIVITTPH
17	1000	17	8955.82224	2647.912342	36	0.29566379	441.3187237	0.049277298	8299.781859	11138.2222	3496.723529	36	0.313939107	582.7872548	0.052323184	10322.31459	Flank	HPKIVITAPH
18	1000	18	722.9413487	252.4936714	42	0.34925886	38.96061935	0.053891812	717.7289362	949.4979116	354.7938576	42	0.373664706	54.74588078	0.057657716	942.6520246	Flank	HPKIVITDPH
19	1000	19	1484.543319	410.9673501	40	0.276830824	64.97964351	0.043770797	1462.392529	1885.061366	593.4707654	40	0.314828353	93.83596718	0.049778733	1856.934467	Flank	HPKIVITNPH
20	1000	20	6938.559887	1995.340561	47	0.287572723	291.0503339	0.041946793	6782.499174	9889.75364	3401.567356	47	0.343948644	496.1695935	0.050170066	9667.315263	Flank	HPKIVITKPH
21	1000	21	4021.707199	700.5106073	61	0.174182399	89.69119252	0.022301771	3978.439514	NA	NA	61	NA	NA	NA	NA	Flank	HPKIVITQPH
22	1000	22	3439.346293	893.3867227	51	0.259754804	125.0991635	0.036372948	3350.529892	4518.888671	1317.44381	51	0.291541551	184.4790329	0.040823983	4402.194569	Flank	HPKIVITEPH
23	1000	23	419.8837669	325.831682	35	0.776004475	55.07560648	0.131168697	363.2050113	556.2093874	435.5287247	35	0.783030158	73.61779095	0.132356254	481.1284759	Flank	HPKIVITGFH
24	1000	24	880.9694598	291.1138884	37	0.330447197	47.85882845	0.054325185	909.2167621	1135.538941	393.7466543	37	0.346748702	64.73155122	0.057005136	1171.94873	Flank	HPKIVITGDH
25	1000	25	434.7580723	172.4431986	40	0.396641741	27.26566372	0.062714566	384.32451	594.9918116	248.4149568	40	0.417509875	39.27785342	0.066014108	525.9705362	Flank	HPKIVITGYH
26	1000	26	744.3400876	273.1067262	35	0.366911215	46.16346232	0.062019315	752.1540724	966.4050822	370.0504246	35	0.382914402	62.54993816	0.064724347	976.5502763	Flank	HPKIVITGIH
27	1000	27	1875.635824	556.9800919	27	0.29695535	107.1908687	0.057149084	1898.54523	2351.518437	737.5833845	27	0.313662599	141.9479885	0.060364395	2380.240372	Flank	HPKIVITGVH
28	1000	28	641.5451469	512.9222666	39	0.799510789	82.13329559	0.128024187	496.9235718	741.8526057	596.8024683	39	0.8044758	95.56487744	0.128819225	574.6190247	Flank	HPKIVITGLH
29	1000	29	491.5529647	313.9868761	22	0.638765095	66.94222691	0.136185176	349.7116025	590.998085	383.5937275	22	0.649060864	81.78245749	0.138380241	420.4610738	Flank	HPKIVITGEH
30	1000	30	783.1723316	344.1620742	35	0.439446161	58.17400826	0.074279958	697.9786432	1018.873753	463.0739901	35	0.454495946	78.27379059	0.076823836	908.0404034	Flank	HPKIVITGSH
31	1000	31	1197.683502	396.1433694	31	0.330757975	71.14944951	0.059405886	1145.127825	1612.87816	564.3835153	31	0.349923218	101.3662717	0.062848065	1542.103282	Flank	HPKIVITGTH
32	1000	32	1286.523118	339.4257084	32	0.263831799	60.00255503	0.046639313	1275.823795	1799.071316	530.8357807	32	0.295060999	93.83939505	0.052159908	1784.109405	Flank	HPKIVITGRH
33	1000	33	1886.307992	808.2943272	31	0.428506018	145.1739468	0.076961953	1690.07132	2278.79595	1046.694841	31	0.459319247	187.9919431	0.082496172	2041.727913	Flank	HPKIVITGAH
34	1000	34	7572.926246	2303.996316	40	0.304241219	364.2938039	0.048104761	7443.57801	9644.176097	3192.248765	40	0.331002745	504.7388478	0.052336129	9479.450187	Flank	HPKIVITGPT
35	1000	35	5901.090349	763.1029158	29	0.129315579	141.704654	0.0240133	5730.642467	7666.545615	1483.479547	29	0.193500388	275.4752362	0.03593212	7445.104087	Flank	HPKIVITGPF
36	1000	36	11703.53489	2107.985564	38	0.180115289	341.9604139	0.029218558	11173.41962	15002.7961	3061.229837	38	0.204043954	496.5970546	0.0331003	14323.23976	Flank	HPKIVITGPD
37	1000	37	7243.933545	2187.719299	28	0.302007091	413.440086	0.057073976	6984.585752	9116.488127	2976.857641	28	0.326535569	562.5732147	0.061709422	8790.09901	Flank	HPKIVITGPA
38	1000	38	10787.03169	2746.406299	35	0.254602599	464.2273937	0.043035694	10465.53209	14474.05233	4074.747718	35	0.281520864	688.7580741	0.047585711	14042.66378	Flank	HPKIVITGPG
39	1000	39	7956.531916	1441.138554	27	0.181126472	277.347244	0.034857806	8108.141533	10167.06602	2210.651215	27	0.217432562	425.4400247	0.041844916	10360.79678	Flank	HPKIVITGPI
40	1000	40	8896.760254	1886.829947	45	0.212080566	281.2720016	0.031615104	8237.060338	12455.66967	3157.889548	45	0.25353029	470.7503796	0.037794064	11532.07456	Flank	HPKIVITGPQ
41	1000	41	6466.581003	2348.805061	33	0.363222089	408.8744793	0.06322885	6253.768742	8263.497507	3176.783723	33	0.384435733	553.0070639	0.066921671	7991.549534	Flank	HPKIVITGPV
42	1000	42	8352.226462	2036.09547	45	0.243778767	303.523192	0.036340393	8172.10776	11430.46796	3063.702559	45	0.268029495	456.7098123	0.039955478	11183.96589	Flank	HPKIVITGPY
43	1000	43	6459.477099	2489.027802	28	0.385329612	470.3820407	0.072820452	6177.316945	8870.226955	3570.787703	28	0.402558776	674.8154463	0.076076458	8482.761443	Flank	HPKIVITGPS
44	1000	44	497.528195	454.5862318	52	0.913689388	63.03976799	0.126705921	408.4448638	588.3663696	541.3548095	52	0.920098152	75.07240477	0.127594656	483.0182975	Flank	HSKIVITGPH
45	1000	45	180.2314867	105.6670204	31	0.586285018	18.97835712	0.105299898	170.9437734	235.4149983	140.5143608	31	0.596879391	25.23712422	0.107202703	223.2835608	Flank	HFKIVITGPH
46	1000	46	152.5687045	116.49393	36	0.763550627	19.41565499	0.127258438	114.7207319	242.6151647	189.6815146	36	0.781820522	31.61358577	0.13030342	182.4292168	Flank	HYKIVITGPH
47	1000	47	455.1115372	870.6084664	24	1.912956265	177.712209	0.390480562	244.7811593	587.4131155	1125.799718	24	1.916538272	229.802905	0.391211737	315.9393943	Flank	HIKIVITGPH
48	1000	48	3625.829413	963.7322936	41	0.265796369	150.5096978	0.041510419	3563.517574	4705.538386	1423.680577	41	0.302554237	222.3415514	0.047251033	4624.671166	Flank	HPKFVITGPH
49	125	1	633.2312027	190.5587493	19	0.300930763	43.71717531	0.069038252	617.8371845	957.6250445	327.7461318	19	0.342248914	75.19011934	0.078517286	934.3449261	Flank	HPKIVITGPH
50	125	2	-23.85349784	21.28992845	30	-0.892528576	3.886991353	-0.162952678	-22.10109895	-30.43982954	27.3950377	30	-0.899973427	5.001626704	-0.164311916	-28.20356533	Flank	Scrambled
51	125	3	823.9288955	374.8559893	29	0.454961577	69.6090097	0.084484244	807.6844174	1055.973021	499.568207	29	0.47308804	92.76748715	0.087850244	1035.15359	Flank	FPKIVITGPH
52	125	4	1117.182767	334.2345957	30	0.29917629	61.02260918	0.054621868	1164.987662	1366.713541	430.7811084	30	0.315194879	78.64951015	0.057546448	1425.196002	Flank	YPKIVITGPH
53	125	5	6733.137997	1857.56999	30	0.275884735	339.1443285	0.050369431	6672.936914	8215.155479	2439.328835	30	0.296930331	445.3584761	0.054211813	8141.703657	Flank	IPKIVITGPH
54	125	6	4377.565311	1551.525995	43	0.354426693	236.6054961	0.054049564	4280.737445	5801.913736	2174.034693	43	0.37470993	331.5371825	0.057142729	5673.580545	Flank	VPKIVITGPH
55	125	7	1140.359093	361.760448	38	0.3172338	58.68529398	0.051462118	1065.435261	1687.390296	582.9647148	38	0.345483032	94.56936451	0.056044748	1576.52544	Flank	TPKIVITGPH
56	125	8	336.2685263	110.4636988	37	0.328498477	18.16012022	0.054004817	356.8400356	448.5026168	159.0406661	37	0.354603652	26.14612444	0.058296481	475.9401408	Flank	QPKIVITGPH
57	125	9	758.1860145	313.150515	42	0.413025971	48.3201735	0.063731291	725.4417911	969.614152	414.1018174	42	0.427078974	63.89729765	0.065899716	927.7388579	Flank	APKIVITGPH
58	125	10	159.6316164	83.19442344	34	0.521165076	14.26772591	0.089379073	158.9793093	202.5559706	108.091938	34	0.533639851	18.53761443	0.091518479	201.7282604	Flank	GPKIVITGPH
59	125	11	1233.311034	338.9586165	26	0.27483628	66.47525385	0.053899829	1270.992846	1539.805192	468.1026742	26	0.304001231	91.80248732	0.059619547	1586.851435	Flank	NPKIVITGPH
60	125	12	-21.87118283	20.04890925	32	-0.916681526	3.544179921	-0.162047931	-24.40582816	-28.40155214	26.2804466	32	-0.925317267	4.645770501	-0.163574529	-31.69300016	Flank	EPKIVITGPH
61	125	13	1375.978527	565.2113344	39	0.410770462	90.50624749	0.065775916	1270.5167	2034.159013	889.6712794	39	0.43736565	142.4614195	0.070034554	1878.250965	Flank	RPKIVITGPH
62	125	14	225.3652516	65.60318235	34	0.29109715	11.25085295	0.049922749	223.4917069	345.4184894	112.2781783	34	0.325049706	19.25554872	0.055745565	342.5468977	Flank	HPKIVITHPH
63	125	15	377.8337942	108.6106769	22	0.287456227	23.15587411	0.061285874	381.400347	478.5253201	151.0156617	22	0.315585519	32.19664726	0.067283059	483.042348	Flank	HPKIVITSPH
64	125	16	228.4523687	91.038587	32	0.398501392	16.09350055	0.070445759	211.9284643	313.3883293	130.3757027	32	0.416019649	23.04738587	0.073542579	290.7210275	Flank	HPKIVITTPH
65	125	17	1357.349387	436.388505	25	0.321500499	87.27770099	0.0643001	1246.089391	1688.115136	571.2299687	25	0.338383299	114.2459937	0.06767666	1549.742743	Flank	HPKIVITAPH
66	125	18	44.0566217	23.59688048	22	0.535603493	5.030871822	0.114191048	40.38052421	57.86315912	31.9305387	22	0.551828472	6.807613723	0.117650226	53.03504008	Flank	HPKIVITDPH
67	125	19	133.3803167	60.11744435	34	0.450722009	10.31005665	0.077298187	127.8047029	169.3652713	80.44973694	34	0.47500728	13.79701606	0.081463077	162.285401	Flank	HPKIVITNPH
68	125	20	979.0124098	456.2907604	24	0.466072499	93.13996145	0.09513665	890.0560404	1395.418026	701.6416232	24	0.502818231	143.2219966	0.102637342	1268.625638	Flank	HPKIVITKPH
69	125	21	376.3022229	113.6619262	46	0.302049574	16.75853674	0.04453478	345.6749732	NA	NA	46	NA	NA	NA	NA	Flank	HPKIVITQPH
70	125	22	211.1723871	93.75390774	37	0.443968594	15.41304749	0.072987987	207.8937936	277.4551983	128.5405436	37	0.463283962	21.1319352	0.076163414	273.1475195	Flank	HPKIVITEPH
71	125	23	-5.082321618	29.65384166	38	-5.83470388	4.810488337	-0.946513955	-7.611458767	-6.732422676	39.28801147	38	-5.835642437	6.373357054	-0.946666209	-10.08270658	Flank	HPKIVITGFH
72	125	24	42.52123349	33.42786389	31	0.786145207	6.003821591	0.141195847	46.09825184	54.80838854	43.47046751	31	0.793135297	7.807526446	0.142451305	59.41904057	Flank	HPKIVITGDH
73	125	25	-1.212268286	25.25297039	23	-20.831173	5.265608325	-4.343599832	-7.486752115	-1.659059946	34.5608413	23	-20.83158079	7.206433572	-4.343684863	-10.24605749	Flank	HPKIVITGYH
74	125	26	38.80729363	64.35296118	17	1.658269752	15.60788566	0.402189491	21.44929894	50.3849872	83.73400014	17	1.661883922	20.30847806	0.403066056	27.84844166	Flank	HPKIVITGIH
75	125	27	101.2693208	116.1335015	14	1.146778714	31.03798384	0.306489503	78.0000266	126.9631727	146.1623053	14	1.151218123	39.06351923	0.307675985	97.79003913	Flank	HPKIVITGVH
76	125	28	29.70522527	66.75693655	24	2.24731292	13.62670261	0.458730829	18.78260752	34.34972407	77.25541735	24	2.249084074	15.76969603	0.459092364	21.7193231	Flank	HPKIVITGLH
77	125	29	25.30364844	38.82751492	16	1.534463104	9.706878729	0.383615776	18.26721874	30.42278013	46.81388937	16	1.538777494	11.70347234	0.384694373	21.96282409	Flank	HPKIVITGEH
78	125	30	38.26779406	48.45160481	26	1.266119619	9.502141477	0.248306486	32.3969523	49.78476561	63.2974193	26	1.271421458	12.41364524	0.249346263	42.14705123	Flank	HPKIVITGSH
79	125	31	60.06330621	47.17848627	20	0.785479343	10.54943024	0.17563852	50.63762679	80.88513753	64.20177061	20	0.793740019	14.35595234	0.177485664	68.19190727	Flank	HPKIVITGTH
80	125	32	134.3970168	51.50293273	34	0.383214851	8.832680094	0.065720805	136.2238351	187.9405154	76.18140386	34	0.405348489	13.06500298	0.069516692	190.4951344	Flank	HPKIVITGRH
81	125	33	118.9623893	44.33926706	31	0.372716682	7.963567452	0.066941892	114.8559361	143.7151368	58.60238925	31	0.407767689	10.52529982	0.073237239	138.7542454	Flank	HPKIVITGAH
82	125	34	834.956582	315.5908131	36	0.377972723	52.59846884	0.062995454	836.963677	1063.323219	425.1477891	36	0.39982931	70.85796484	0.066638218	1065.879269	Flank	HPKIVITGPT
83	125	35	622.611164	163.902797	31	0.263250656	29.43781137	0.047281213	618.1343619	808.8804961	242.692173	31	0.300034646	43.58880104	0.053887813	803.0643493	Flank	HPKIVITGPF
84	125	36	1691.046038	472.5253903	28	0.279427869	89.29890506	0.052806904	1704.551288	2167.756933	640.3964615	28	0.295418943	121.0235556	0.055828933	2185.069352	Flank	HPKIVITGPD
85	125	37	763.4910412	265.3046991	27	0.347488949	51.05791315	0.066874279	771.9008436	960.8532393	354.5610481	27	0.369006455	68.23530552	0.071015325	971.4369731	Flank	HPKIVITGPA
86	125	38	1373.645112	512.8952886	30	0.373382677	93.64143973	0.068170038	1462.07859	1843.158694	722.9462789	30	0.392232249	131.9913283	0.071611483	1961.818842	Flank	HPKIVITGPG
87	125	39	1045.636246	301.9915822	22	0.288811318	64.38482165	0.06157478	1063.825408	1336.141531	418.0267729	22	0.312861148	89.12360744	0.066702221	1359.384123	Flank	HPKIVITGPI
88	125	40	1199.513709	404.9025666	26	0.337555597	79.40792647	0.066200099	1127.549807	1679.346874	613.0035294	26	0.365024962	120.219883	0.071587285	1578.59575	Flank	HPKIVITGPQ
89	125	41	745.0076801	438.3480462	32	0.588380574	77.489719	0.104011973	578.6270129	952.0284527	572.842922	32	0.601707775	101.2652787	0.106367912	739.4143638	Flank	HPKIVITGPV
90	125	42	1012.975565	297.2708084	34	0.293462961	50.98152305	0.050328483	1030.647808	1386.311158	435.1609137	34	0.313898443	74.62948101	0.053833139	1410.496567	Flank	HPKIVITGPY
91	125	43	996.9258475	393.9918101	29	0.395206736	73.16244242	0.073388048	936.3682476	1368.989841	564.0554173	29	0.412023085	104.7424615	0.076510766	1285.83146	Flank	HPKIVITGPS
92	125	44	16.70851723	34.71616294	26	2.077752469	6.808399702	0.407480784	27.59078612	19.75914073	41.11044692	26	2.080578679	8.062421963	0.408035049	32.62828283	Flank	HSKIVITGPH
93	125	45	-12.58431002	32.03696809	27	-2.545786621	6.165517383	-0.489936864	-24.12642548	-16.43739047	41.8865362	27	-2.54824732	8.061067651	-0.490410425	-31.51348588	Flank	HFKIVITGPH
94	125	46	-31.57164801	20.95940465	27	-0.663867931	4.033639306	-0.127761443	-33.93004096	-50.20531967	34.38072603	27	-0.684802452	6.616573809	-0.131790293	-53.95564249	Flank	HYKIVITGPH
95	125	47	5.721080056	42.93981816	20	7.505544013	9.601635236	1.678290662	1.621237185	7.384206255	55.4292324	20	7.506457767	12.39435316	1.678494984	2.092533165	Flank	HIKIVITGPH
96	125	48	391.8513357	137.6027195	26	0.351160522	26.98611354	0.068868244	357.0750979	508.5378522	193.1139056	26	0.379743425	37.8727528	0.074473813	463.4058553	Flank	HPKFVITGPH
97	2000	1	8866.275375	2065.632621	13	0.232976366	572.9034102	0.064616018	9938.890041	13408.32119	3812.610384	13	0.284346588	1057.427864	0.078863554	15030.41855	Flank	HPKIVITGPH
98	2000	2	296.3275858	151.7907087	35	0.512239548	25.65731265	0.086584287	289.1711581	378.1483648	198.5672384	35	0.525104052	33.56398928	0.088758785	369.015933	Flank	Scrambled
99	2000	3	11888.48242	2237.462914	32	0.18820425	395.5312998	0.033270125	12065.30036	15236.65059	3482.602973	32	0.228567489	615.6430446	0.040405405	15463.26599	Flank	FPKIVITGPH
100	2000	4	12534.02493	1977.849162	38	0.157798407	320.8495018	0.025598282	12427.89839	15333.58918	2858.046767	38	0.186391244	463.6364082	0.030236653	15203.75853	Flank	YPKIVITGPH
101	2000	5	25300.96269	8133.135418	34	0.321455571	1394.821217	0.055129176	26473.35091	30869.90678	10486.1815	34	0.339689445	1798.36529	0.058256259	32300.34701	Flank	IPKIVITGPH
102	2000	6	28786.0067	5685.167316	36	0.197497603	947.527886	0.032916267	28337.4147	38152.24122	8848.898491	36	0.231936531	1474.816415	0.038656089	37557.68879	Flank	VPKIVITGPH
103	2000	7	16296.18817	3563.51504	44	0.218671692	537.2201056	0.032965998	16075.48502	24113.48315	6220.089238	44	0.257950674	937.7137348	0.038887527	23786.90852	Flank	TPKIVITGPH
104	2000	8	8707.662478	2702.416173	46	0.31034921	398.4495269	0.045758495	8321.413946	11613.96058	3923.888485	46	0.337859635	578.545794	0.049814686	11098.79646	Flank	QPKIVITGPH
105	2000	9	13074.0589	4249.206491	47	0.325010505	619.8104687	0.047407655	13402.75232	16719.89761	5729.775618	47	0.342692028	835.7736718	0.04998677	17140.25065	Flank	APKIVITGPH
106	2000	10	6089.003636	1744.229138	49	0.286455591	249.1755911	0.040922227	6043.155921	7726.314304	2384.106496	49	0.308569701	340.5866423	0.044081386	7668.138308	Flank	GPKIVITGPH
107	2000	11	14653.99723	3597.541031	50	0.245498957	508.7691317	0.034718795	14062.69931	18295.71001	5081.845654	50	0.277761598	718.6815045	0.039281422	17557.46671	Flank	NPKIVITGPH
108	2000	12	741.8087852	260.0092788	32	0.350507144	45.96358105	0.061961495	694.4697192	963.3004788	358.8372284	32	0.372508097	63.43405938	0.06585075	901.8267597	Flank	EPKIVITGPH
109	2000	13	13457.44971	4022.999789	45	0.298942212	599.7134001	0.044563674	13091.07785	19894.63651	6655.723399	45	0.334548631	992.1766639	0.049871565	19353.01568	Flank	RPKIVITGPH
110	2000	14	4846.451288	1103.501565	47	0.227692697	160.9622465	0.033212393	4792.642005	7428.181013	2003.733413	47	0.269747521	292.2745572	0.03934672	7345.707246	Flank	HPKIVITHPH
111	2000	15	7222.09814	1929.864468	35	0.267216594	326.2066332	0.045167848	7345.532742	9146.764734	2719.03403	35	0.297267297	459.6006358	0.050247344	9303.094272	Flank	HPKIVITSPH
112	2000	16	5445.312909	1083.501966	40	0.198978825	171.316703	0.031461315	5463.227795	7469.817558	1733.60226	40	0.232080937	274.1065849	0.036695218	7494.392993	Flank	HPKIVITTPH
113	2000	17	13085.84019	3375.342713	33	0.257938555	587.5717476	0.044901339	12408.96236	16274.66377	4535.728197	33	0.278698734	789.5689325	0.048515222	15432.84094	Flank	HPKIVITAPH
114	2000	18	1308.654017	322.4194352	33	0.246374849	56.12601951	0.042888356	1293.582077	1718.76219	481.0818957	33	0.279900209	83.74560872	0.048724372	1698.966981	Flank	HPKIVITDPH
115	2000	19	2792.527788	834.9349089	40	0.298988935	132.0148005	0.047274301	2637.832971	3545.9297	1186.037794	40	0.334478654	187.529041	0.052885719	3349.499444	Flank	HPKIVITNPH
116	2000	20	11118.57222	3306.609905	47	0.297395191	482.3186256	0.043379547	10391.19599	15847.6603	5581.583265	47	0.352202354	814.1575955	0.051373993	14810.90745	Flank	HPKIVITKPH
117	2000	21	7433.585894	1653.12973	50	0.222386578	233.7878484	0.031450211	7468.726406	NA	NA	50	NA	NA	NA	NA	Flank	HPKIVITQPH
118	2000	22	5572.978076	1652.962067	57	0.296603009	218.9401743	0.039286028	5325.916452	7322.225025	2378.283739	57	0.324803421	315.0113767	0.043021264	6997.615671	Flank	HPKIVITEPH
119	2000	23	682.607818	402.3036895	40	0.589362851	63.60979849	0.093186449	656.9100702	904.2332813	541.2588558	40	0.598583205	85.5805394	0.094644315	870.1921259	Flank	HPKIVITGFH
120	2000	24	1601.791539	464.8369042	35	0.290198127	78.57177747	0.049052436	1523.386185	2064.653488	637.2199888	35	0.308632898	107.7098369	0.052168481	1963.591718	Flank	HPKIVITGDH
121	2000	25	853.4427172	291.0058789	29	0.340978806	54.0384351	0.063318175	846.363648	1167.986199	426.3651536	29	0.365042972	79.17402139	0.067786778	1158.298079	Flank	HPKIVITGYH
122	2000	26	1494.197126	588.2014815	26	0.393657216	115.3558012	0.077202532	1537.766501	1939.973032	792.7006217	26	0.408614248	155.4613823	0.080135847	1996.540811	Flank	HPKIVITGIH
123	2000	27	3699.321214	767.2926974	24	0.207414456	156.622966	0.042338299	3825.546081	4637.905679	1069.96497	24	0.230700028	218.4056849	0.047091446	4796.156069	Flank	HPKIVITGVH
124	2000	28	1077.18377	380.7633775	41	0.353480426	59.46524905	0.055204368	1038.039666	1245.604601	454.1116701	41	0.364571285	70.92032783	0.056936469	1200.340202	Flank	HPKIVITGLH
125	2000	29	1248.949872	506.8107333	18	0.405789491	119.4564354	0.0956455	1069.903701	1501.622481	633.4004357	18	0.421810704	149.2939144	0.099421736	1286.353829	Flank	HPKIVITGEH
126	2000	30	1579.402506	495.5737512	35	0.313772929	83.76725288	0.053037305	1512.053459	2054.735203	687.3606386	35	0.334525168	116.1851536	0.056545074	1967.116969	Flank	HPKIVITGSH
127	2000	31	2388.501686	1016.145325	37	0.425432115	167.0532623	0.069940609	2165.921325	3216.511038	1416.864551	37	0.440497338	232.9310973	0.072417316	2916.76991	Flank	HPKIVITGTH
128	2000	32	2295.340386	722.4242846	34	0.314735143	123.8947427	0.053976632	2193.062506	3209.799335	1095.628156	34	0.341338521	187.8986786	0.058539073	3066.774156	Flank	HPKIVITGRH
129	2000	33	4034.17708	1335.078952	51	0.33094208	186.9484468	0.04634116	3758.367126	4873.576548	1803.087802	51	0.369972193	252.4827938	0.051806469	4540.378254	Flank	HPKIVITGAH
130	2000	34	11176.58701	2220.058387	41	0.198634734	346.7148699	0.031021534	11328.79087	14233.46402	3381.933813	41	0.237604409	528.1693261	0.037107574	14427.29674	Flank	HPKIVITGPT
131	2000	35	9004.843523	1371.772465	25	0.15233718	274.3544931	0.030467436	9066.310438	11698.86234	2451.923507	25	0.209586491	490.3847015	0.041917298	11778.71858	Flank	HPKIVITGPF
132	2000	36	14756.54589	4189.24438	38	0.283890581	679.5851768	0.046053133	14840.23822	18916.45995	5668.195931	38	0.299643588	919.5027991	0.048608609	19023.7454	Flank	HPKIVITGPD
133	2000	37	10394.21649	2194.753509	33	0.211151414	382.0575462	0.036756743	9953.433032	13081.11824	3204.262954	33	0.24495329	557.7905841	0.042640895	12526.39239	Flank	HPKIVITGPA
134	2000	38	15938.11007	3052.772487	25	0.191539177	610.5544974	0.038307835	15403.38257	21385.77561	4835.208472	25	0.226094604	967.0416944	0.045218921	20668.2776	Flank	HPKIVITGPG
135	2000	39	12034.86596	2301.191479	38	0.191210395	373.302552	0.031018422	12320.54378	15378.46865	3474.02077	38	0.225901606	563.5605864	0.03664608	15743.5153	Flank	HPKIVITGPI
136	2000	40	13842.793	2796.595669	37	0.202025391	459.7574959	0.03321277	13537.80288	19380.22966	4751.663205	37	0.245180954	781.168619	0.040307501	18953.23644	Flank	HPKIVITGPQ
137	2000	41	10187.95919	3131.052469	29	0.307328721	581.4218471	0.057069511	9856.919823	13018.96247	4324.0106	29	0.332131736	802.9486106	0.061675315	12595.93475	Flank	HPKIVITGPV
138	2000	42	13202.71549	2483.823546	42	0.188129749	383.2622939	0.02902905	12900.32181	18068.62124	3950.567798	42	0.21864246	609.5858455	0.033737264	17654.77933	Flank	HPKIVITGPY
139	2000	43	10790.00182	2219.602636	42	0.205709199	342.4921223	0.031741619	10517.83046	14816.95244	3502.91474	42	0.236412633	540.511479	0.036479261	14443.20366	Flank	HPKIVITGPS
140	2000	44	718.5989727	545.4011634	38	0.75897849	88.47575182	0.123122569	547.9536852	849.8000174	651.5260292	38	0.766681591	105.6914784	0.124372177	647.9984927	Flank	HSKIVITGPH
141	2000	45	366.5265736	193.2410456	27	0.52722247	37.18925656	0.101464012	271.9269911	478.7501577	258.0363062	27	0.538979052	49.65911029	0.103726567	355.1859517	Flank	HFKIVITGPH
142	2000	46	370.8424867	343.7109021	44	0.926837982	51.81636812	0.139726083	259.9174193	589.7147208	555.4794684	44	0.941946078	83.7416807	0.142003714	413.3213799	Flank	HYKIVITGPH
143	2000	47	631.7904818	306.2340078	20	0.484708169	68.47600584	0.108384042	608.6198833	815.4528833	406.6316839	20	0.498657485	90.9256087	0.111503203	785.5465586	Flank	HIKIVITGPH
144	2000	48	6138.653335	1826.21269	36	0.297494025	304.3687817	0.049582338	5884.557086	7966.637594	2634.947187	36	0.330747716	439.1578646	0.055124619	7636.875898	Flank	HPKFVITGPH
145	250	1	1966.747428	412.6120735	13	0.209794134	114.4379991	0.058186424	1934.704365	2974.279513	790.2217568	13	0.265685102	219.1680818	0.073687789	2925.821321	Flank	HPKIVITGPH
146	250	2	25.52966797	40.31791314	37	1.579257247	6.628224091	0.259628292	16.06129634	32.57881702	51.58779665	37	1.583476669	8.480981526	0.260321961	20.49607676	Flank	Scrambled
147	250	3	2334.191748	570.7940162	38	0.244536044	92.59501648	0.039668985	2357.561595	2991.57309	828.0776686	38	0.276803422	134.3319362	0.044903444	3021.524616	Flank	FPKIVITGPH
148	250	4	3151.572107	510.1313068	26	0.161865662	100.0449803	0.031744468	3204.961129	3855.498314	731.9544642	26	0.189846916	143.5480806	0.037232043	3920.812156	Flank	YPKIVITGPH
149	250	5	13801.14653	2614.227757	33	0.189421056	455.07864	0.032973974	13970.89323	16838.88918	3686.738993	33	0.218941936	641.778882	0.038112899	17045.99849	Flank	IPKIVITGPH
150	250	6	11658.66517	2324.733723	46	0.199399647	342.7632877	0.029399874	11569.64848	15452.09832	3608.965528	46	0.233558281	532.1129372	0.03443629	15334.11786	Flank	VPKIVITGPH
151	250	7	3712.323823	829.931745	35	0.223561248	140.2840691	0.037788748	3509.761047	5493.12864	1439.795783	35	0.262108514	243.3699063	0.044304425	5193.396331	Flank	TPKIVITGPH
152	250	8	1107.608597	266.1558275	35	0.240297726	44.988546	0.040617729	1101.24164	1477.287689	406.1211319	35	0.274909982	68.64700051	0.046468268	1468.795676	Flank	QPKIVITGPH
153	250	9	2708.054868	683.7185683	43	0.252475892	104.2661042	0.038502213	2887.725341	3463.224426	951.914804	43	0.274863736	145.1656467	0.041916327	3692.997898	Flank	APKIVITGPH
154	250	10	651.3442332	141.5927989	39	0.217385511	22.67299348	0.034809541	671.1693836	826.4883004	203.1462428	39	0.245794457	32.52943282	0.039358613	851.6443608	Flank	GPKIVITGPH
155	250	11	3400.884672	692.6898611	30	0.203679315	126.4672874	0.037186585	3426.546576	4246.049644	1025.814585	30	0.241592697	187.2872627	0.04410859	4278.088871	Flank	NPKIVITGPH
156	250	12	45.89101852	34.6761055	42	0.755618564	5.350639242	0.116594476	43.74623646	59.59330895	45.65277039	42	0.766072084	7.044375406	0.118207489	56.80813084	Flank	EPKIVITGPH
157	250	13	3133.913965	910.2715523	46	0.290458373	134.2122183	0.042825751	3099.687465	4632.978796	1514.937357	46	0.326989918	223.3653274	0.048212033	4582.380519	Flank	RPKIVITGPH
158	250	14	662.7679435	150.1066698	35	0.226484505	25.37265812	0.038282869	691.6571398	1015.827863	272.9818695	35	0.268728472	46.1423577	0.045423402	1060.106484	Flank	HPKIVITHPH
159	250	15	1064.97404	210.8140852	24	0.197952323	43.03224494	0.040406849	1052.832474	1348.786294	319.6033296	24	0.236956241	65.23875647	0.04836849	1333.409039	Flank	HPKIVITSPH
160	250	16	750.2892251	301.4512037	41	0.401779998	47.0787685	0.062747494	690.0753497	1029.238121	431.4167401	41	0.419161253	67.37597524	0.06546199	946.63742	Flank	HPKIVITTPH
161	250	17	3016.793636	748.4678817	26	0.248100458	146.7866282	0.048656503	2869.6065	3751.941134	1011.595439	26	0.269619219	198.3901879	0.052876679	3568.886693	Flank	HPKIVITAPH
162	250	18	233.2240238	106.2283746	33	0.45547784	18.49198645	0.079288515	201.0026942	306.3121564	145.3300677	33	0.474450866	25.29871753	0.082591295	263.993253	Flank	HPKIVITDPH
163	250	19	348.6589517	123.3581053	28	0.353807366	23.31249063	0.066863307	327.8836175	442.7243794	170.1244335	28	0.384267146	32.15049593	0.072619665	416.3440243	Flank	HPKIVITNPH
164	250	20	2433.787956	878.8071567	32	0.361086164	155.352625	0.063831619	2463.43217	3468.956626	1413.300001	32	0.407413569	249.8385037	0.072021224	3511.209483	Flank	HPKIVITKPH
165	250	21	1040.110165	236.8233672	59	0.227690657	30.83177626	0.029642799	1010.256559	NA	NA	59	NA	NA	NA	NA	Flank	HPKIVITQPH
166	250	22	713.4964581	239.5378579	36	0.335723962	39.92297631	0.055953994	691.3387894	937.4488019	338.3066818	36	0.360880169	56.38444697	0.060146695	908.3362817	Flank	HPKIVITEPH
167	250	23	72.83236675	47.10521601	40	0.646762121	7.447988613	0.10226207	68.83300678	96.47919088	63.21077189	40	0.655175187	9.994500592	0.103592293	91.18134006	Flank	HPKIVITGFH
168	250	24	253.551729	87.64740763	33	0.345678604	15.25745527	0.060174921	226.7763796	326.8193451	118.0777125	33	0.361293523	20.55469142	0.06289313	292.3068525	Flank	HPKIVITGDH
169	250	25	95.58935752	58.95322844	29	0.616734226	10.94733969	0.114524671	76.14715139	130.8196181	82.46316408	29	0.63035778	15.31302514	0.117054501	104.2118236	Flank	HPKIVITGYH
170	250	26	154.5329868	62.21542732	27	0.402602891	11.97336457	0.077480963	145.1883888	200.6360618	83.71326306	27	0.417239365	16.11062499	0.080297753	188.5036143	Flank	HPKIVITGIH
171	250	27	354.4759317	96.59286325	32	0.272494843	17.07536716	0.048170738	349.3986923	444.4128643	129.1515974	32	0.290611744	22.83099259	0.051373384	438.0474377	Flank	HPKIVITGVH
172	250	28	101.519299	66.97800355	45	0.659756364	9.984491262	0.098350672	92.42967239	117.3921381	78.15550937	45	0.665764426	11.65073545	0.099246301	106.8813218	Flank	HPKIVITGLH
173	250	29	129.617982	93.99473468	19	0.725167398	21.56387104	0.166364811	93.85235483	155.8407428	114.426474	19	0.734252622	26.25123351	0.168449104	112.8394414	Flank	HPKIVITGEH
174	250	30	151.9800503	56.49247338	20	0.371709795	12.63210107	0.083116837	143.2720522	197.7195542	76.98931559	20	0.389386451	17.21533432	0.087069457	186.3908206	Flank	HPKIVITGSH
175	250	31	279.1117817	127.5175768	27	0.456869201	24.54076909	0.087924519	228.5320451	375.8699991	177.0083879	27	0.470929812	34.06528013	0.090630484	307.7560505	Flank	HPKIVITGTH
176	250	32	418.5095103	149.1014881	44	0.356267861	22.47789508	0.053709401	413.8280135	585.2428495	222.3773156	44	0.379974426	33.52464172	0.0572833	578.6962538	Flank	HPKIVITGRH
177	250	33	426.8610794	185.607197	30	0.434818741	33.88708289	0.079386678	355.2786129	515.6789365	239.9010801	30	0.465214037	43.79974437	0.084936074	429.2021599	Flank	HPKIVITGAH
178	250	34	2442.937441	798.2370275	27	0.326752955	153.6207876	0.062883635	2325.046189	3111.098419	1094.503664	27	0.351806184	210.6373284	0.067705132	2960.963061	Flank	HPKIVITGPT
179	250	35	1623.622417	455.2834052	35	0.280412121	76.9569414	0.047398299	1678.739691	2109.368708	664.872342	35	0.31519968	112.3839377	0.05327847	2180.975659	Flank	HPKIVITGPF
180	250	36	4527.135252	1136.198366	43	0.250975132	173.2686265	0.038273349	4410.607729	5803.34811	1559.157087	43	0.268665098	237.7692268	0.040971043	5653.971132	Flank	HPKIVITGPD
181	250	37	2180.201786	527.5648226	21	0.241979814	115.1240826	0.052804324	2095.78665	2743.783274	746.2456241	21	0.271976884	162.8441457	0.059350222	2637.546852	Flank	HPKIVITGPA
182	250	38	3848.761081	804.5991112	32	0.209054055	142.2343719	0.036955885	3693.081796	5164.272331	1245.169263	32	0.241112239	220.1169074	0.042623025	4955.381677	Flank	HPKIVITGPG
183	250	39	2617.592279	813.0784546	42	0.310620742	125.4607293	0.047929821	2521.417097	3344.828348	1114.161095	42	0.333099633	171.9187893	0.051398389	3221.933167	Flank	HPKIVITGPI
184	250	40	3116.200151	729.1743519	45	0.23399471	108.6988945	0.034881872	3104.882888	4362.752124	1187.221543	45	0.272126747	176.9805383	0.04056626	4346.907694	Flank	HPKIVITGPQ
185	250	41	1801.45591	630.4771707	43	0.349982016	96.14686717	0.053371757	1672.598275	2302.039735	856.2472564	43	0.371951554	130.5764824	0.05672208	2137.375479	Flank	HPKIVITGPV
186	250	42	2745.54364	526.0110009	37	0.191587194	86.47567587	0.031496741	2887.185855	3757.423096	832.7366488	37	0.221624403	136.9010618	0.036434827	3951.26803	Flank	HPKIVITGPY
187	250	43	2592.483768	1124.41587	31	0.43372147	201.951052	0.077898676	2432.842073	3560.02801	1598.801293	31	0.449097953	287.1531891	0.080660374	3340.80623	Flank	HPKIVITGPS
188	250	44	122.8302056	182.8353951	44	1.488521445	27.56347291	0.224403051	77.62364643	145.2564153	216.7899519	44	1.492463871	32.68231494	0.224997394	91.79609016	Flank	HSKIVITGPH
189	250	45	29.09516042	36.8803481	32	1.267576723	6.519586058	0.224078024	36.816768	38.00355455	48.35996195	32	1.272511546	8.548914259	0.224950386	48.08937401	Flank	HFKIVITGPH
190	250	46	5.007477897	51.8700321	40	10.35851444	8.201372187	1.63782494	-9.144690136	7.962904834	82.49471606	40	10.35987718	13.04355988	1.638040408	-14.54191088	Flank	HYKIVITGPH
191	250	47	55.43921178	40.9330484	31	0.738341096	7.35179252	0.132609976	43.44708441	71.55547036	53.49291189	31	0.74757264	9.607610596	0.13426801	56.07721432	Flank	HIKIVITGPH
192	250	48	1010.147974	265.4304974	26	0.262763975	52.0552033	0.051532255	968.6804701	1310.952482	393.1464602	26	0.299893753	77.10236433	0.058814004	1257.136676	Flank	HPKFVITGPH
193	500	1	3811.142408	1037.466013	16	0.272219167	259.3665033	0.068054792	4068.343359	5763.527449	1828.757996	16	0.317298393	457.189499	0.079324598	6152.488181	Flank	HPKIVITGPH
194	500	2	68.28094953	41.05826001	31	0.601313548	7.37428119	0.107999101	64.80248432	87.13441018	53.35322493	31	0.612309475	9.582522078	0.109974028	82.69548517	Flank	Scrambled
195	500	3	4006.051955	1371.923417	27	0.342462712	264.0267846	0.06590698	4200.979819	5134.281379	1880.177533	27	0.366200719	361.8403349	0.070475361	5384.107021	Flank	FPKIVITGPH
196	500	4	4528.571192	1109.928185	37	0.245094565	182.4710695	0.040293298	4856.416415	5540.060008	1464.847857	37	0.264410106	240.8195042	0.043468754	5941.131811	Flank	YPKIVITGPH
197	500	5	15352.31505	5877.258372	31	0.382825545	1055.586765	0.068757498	16048.00748	18731.48229	7459.990839	31	0.398259504	1339.853908	0.071529518	19580.30218	Flank	IPKIVITGPH
198	500	6	14492.07885	3732.019353	39	0.257521325	597.601369	0.041236414	14412.69879	19207.43276	5470.123232	39	0.284792002	875.9207342	0.045603218	19102.22445	Flank	VPKIVITGPH
199	500	7	6137.795624	2091.049634	38	0.340684142	339.2130432	0.055266266	5358.062851	9082.101275	3334.342627	38	0.36713339	540.9017995	0.0595569	7928.330044	Flank	TPKIVITGPH
200	500	8	2349.747604	542.7046027	29	0.230962935	100.7777147	0.04288874	2292.463197	3134.007101	836.1186653	29	0.266789014	155.2633383	0.049541476	3057.603261	Flank	QPKIVITGPH
201	500	9	4505.785969	847.602401	32	0.188114217	149.8363514	0.03325421	4284.837104	5762.271735	1251.792443	32	0.217239398	221.2877313	0.038402863	5479.708958	Flank	APKIVITGPH
202	500	10	1485.662936	622.2516876	31	0.418837727	111.7597023	0.075225476	1383.164237	1885.152232	818.6500041	31	0.434262013	147.0338812	0.07799576	1755.09201	Flank	GPKIVITGPH
203	500	11	5378.611886	1389.974356	43	0.258426223	211.9691021	0.03940963	5399.777743	6715.268315	1942.395054	43	0.28925055	296.2124687	0.044110295	6741.694169	Flank	NPKIVITGPH
204	500	12	111.521799	52.22564213	36	0.468299853	8.704273688	0.078049976	106.1122759	144.8203426	70.23589195	36	0.484986368	11.70598199	0.080831061	137.7956264	Flank	EPKIVITGPH
205	500	13	5924.340517	1402.009293	35	0.236652382	236.9828238	0.040001553	5579.996664	8758.16768	2454.798784	35	0.280286799	414.9367273	0.047377116	8249.111659	Flank	RPKIVITGPH
206	500	14	1392.337619	454.5705078	27	0.326480088	87.48213502	0.062831122	1436.885692	2134.043087	762.0327168	27	0.357084035	146.6532647	0.068720855	2202.322149	Flank	HPKIVITHPH
207	500	15	2274.604777	374.4237145	15	0.164610449	96.67578738	0.042502235	2336.675167	2880.779845	604.6875456	15	0.209904116	156.1296529	0.05419701	2959.3918	Flank	HPKIVITSPH
208	500	16	1568.988051	704.625139	21	0.449095287	153.7618112	0.098000626	1437.905844	2152.319744	1000.204928	21	0.464710195	218.2626093	0.101408078	1972.502682	Flank	HPKIVITTPH
209	500	17	5049.294455	1660.74834	27	0.32890701	319.611167	0.063298184	4637.400617	6279.732011	2169.195306	27	0.345428006	417.4618313	0.066477651	5767.465803	Flank	HPKIVITAPH
210	500	18	404.0383394	156.4088585	33	0.387113903	27.22728746	0.067387881	408.1541969	530.6565466	217.181028	33	0.409268536	37.80636427	0.071244507	536.0622383	Flank	HPKIVITDPH
211	500	19	921.3263831	301.0240549	31	0.326729008	54.06551631	0.058682262	863.757704	1169.892955	420.5654225	31	0.359490516	75.53577973	0.064566403	1096.792701	Flank	HPKIVITNPH
212	500	20	5273.160861	2238.604841	23	0.424528077	466.7813766	0.088520223	5061.8097	7516.006588	3491.722523	23	0.464571509	728.0744759	0.096869856	7214.760948	Flank	HPKIVITKPH
213	500	21	2154.410621	406.1847537	39	0.188536368	65.04161471	0.030189981	2076.3126	NA	NA	39	NA	NA	NA	NA	Flank	HPKIVITQPH
214	500	22	1520.542778	330.3829433	44	0.217279611	49.80710273	0.032756134	1562.73997	1997.810907	508.301937	44	0.254429453	76.62940025	0.038356683	2053.252957	Flank	HPKIVITEPH
215	500	23	221.0506648	215.5720987	30	0.97521579	39.3579004	0.178049229	178.3180449	292.8202149	287.2026167	30	0.980815539	52.43578392	0.179071598	236.213396	Flank	HPKIVITGFH
216	500	24	601.3042301	192.0571476	31	0.319400959	34.49448201	0.057366106	547.993374	775.0602035	260.6050299	31	0.336238435	46.8060451	0.060390206	706.3443672	Flank	HPKIVITGDH
217	500	25	208.0237267	97.7245764	24	0.469776106	19.94794563	0.095892646	223.0107691	284.6926185	138.7944155	24	0.487523759	28.33129143	0.099515371	305.2032612	Flank	HPKIVITGYH
218	500	26	368.2120743	124.5584337	31	0.338279058	22.37135511	0.060756712	379.4221	478.0637585	169.9866741	31	0.355573229	30.53050794	0.063862837	492.6181618	Flank	HPKIVITGIH
219	500	27	872.0972992	345.855428	29	0.396578946	64.22374066	0.073642862	830.6131863	1093.364102	447.4472955	29	0.409239058	83.08887685	0.075993785	1041.354722	Flank	HPKIVITGVH
220	500	28	322.426429	178.0309016	22	0.552159766	37.95631576	0.117720858	304.2082612	372.8387436	208.537951	22	0.559324787	44.46044054	0.119248445	351.7721119	Flank	HPKIVITGLH
221	500	29	307.9415459	197.4848962	20	0.641306439	44.15896524	0.143400479	238.0655977	370.2405986	241.234724	20	0.651562052	53.94172415	0.145693704	286.2281838	Flank	HPKIVITGEH
222	500	30	417.5244258	89.43057812	17	0.214192446	21.69010116	0.051949299	383.0425262	543.1814451	132.3090555	17	0.243581692	32.08965946	0.059077238	498.3219664	Flank	HPKIVITGSH
223	500	31	570.6718311	260.4890053	30	0.456460248	47.55856806	0.083337858	558.2875644	768.5036416	361.6063844	30	0.470533079	66.01999122	0.085907194	751.826186	Flank	HPKIVITGTH
224	500	32	830.9639328	374.6200406	24	0.450825873	76.46899558	0.092024446	784.5817269	1162.018276	545.8985051	24	0.469784784	111.4310657	0.095894417	1097.157494	Flank	HPKIVITGRH
225	500	33	1032.754494	292.7886471	29	0.283502661	54.36948683	0.052645122	1025.544513	1247.641832	409.5050951	29	0.328223281	76.04318713	0.060949533	1238.931655	Flank	HPKIVITGAH
226	500	34	3984.395811	1709.814937	41	0.429127782	267.0282309	0.0670185	3721.110995	5074.156752	2275.750825	41	0.448498329	355.4125674	0.070043671	4738.861643	Flank	HPKIVITGPT
227	500	35	2993.398334	833.6527408	17	0.278497095	202.1904886	0.067545467	2972.261912	3888.946536	1219.173965	17	0.31349723	295.6931197	0.076034247	3861.486637	Flank	HPKIVITGPF
228	500	36	7168.873447	2062.821418	47	0.287746943	300.8934285	0.041972205	6980.781395	9189.800139	2787.263823	47	0.303299722	406.5642139	0.044240811	8948.68438	Flank	HPKIVITGPD
229	500	37	4262.684199	1121.848971	32	0.263179001	198.3167537	0.046523914	4389.018362	5364.586747	1561.089044	32	0.290998938	275.9641622	0.051441831	5523.578251	Flank	HPKIVITGPA
230	500	38	6440.10465	1267.790643	38	0.196858702	205.6627997	0.031934698	6396.161854	8641.340307	1992.852372	38	0.230618434	323.2833439	0.03741125	8582.377809	Flank	HPKIVITGPG
231	500	39	5019.773331	1837.281001	20	0.366008758	410.8285213	0.081842046	4795.431773	6414.398558	2471.271655	20	0.385269427	552.5931411	0.086148863	6127.729006	Flank	HPKIVITGPI
232	500	40	4907.206875	1434.184419	28	0.292260843	271.035379	0.055232108	5007.619565	6870.202868	2223.185783	28	0.323598273	420.1426215	0.061154325	7010.782953	Flank	HPKIVITGPQ
233	500	41	3512.71868	1667.2312	29	0.47462702	309.5970614	0.088136025	3316.842513	4488.823698	2204.242603	29	0.491051276	409.3175755	0.091185933	4238.517977	Flank	HPKIVITGPV
234	500	42	4769.65897	1561.764065	38	0.32743726	253.3515861	0.053117338	4479.904688	6527.533021	2257.685636	38	0.345871193	366.2449723	0.056107717	6130.988811	Flank	HPKIVITGPY
235	500	43	4503.781516	1690.539213	32	0.375359952	298.8479353	0.066354892	4273.758961	6184.643679	2430.728245	32	0.393026401	429.6961064	0.069477908	5868.774106	Flank	HPKIVITGPS
236	500	44	199.3865248	128.0269735	36	0.642104443	21.33782891	0.107017407	181.8674298	235.7903068	153.5446543	36	0.651191545	25.59077572	0.108531924	215.0725939	Flank	HSKIVITGPH
237	500	45	172.413738	441.5490018	21	2.560985029	96.3538916	0.55885275	55.35961869	225.203601	577.2939234	21	2.563431139	125.975862	0.559386535	72.30969889	Flank	HFKIVITGPH
238	500	46	72.14791054	138.72211	40	1.922746051	21.93389148	0.304012844	43.60073979	114.7298016	221.4370219	40	1.930074129	35.01226737	0.305171515	69.33401381	Flank	HYKIVITGPH
239	500	47	226.6004204	252.7715489	19	1.115494616	57.98977039	0.255912016	129.8260064	292.4734884	328.0459513	19	1.121626282	75.25890267	0.257318717	167.5666132	Flank	HIKIVITGPH
240	500	48	2307.864868	591.4426035	33	0.256272632	102.9569421	0.044611339	2211.456619	2995.10691	881.2285491	33	0.294222736	153.4022002	0.051217604	2869.989959	Flank	HPKFVITGPH
241	63	1	331.2769428	89.65863505	12	0.270645564	25.88221854	0.078128645	350.3902311	500.9846257	158.2857863	12	0.315949389	45.69317066	0.091206732	529.8893346	Flank	HPKIVITGPH
242	63	2	-12.27150487	115.9778944	67	-9.450992004	14.16895492	-1.154622442	-26.37269296	-15.65986334	148.0122988	67	-9.451697984	18.0825803	-1.154708691	-33.65461468	Flank	Scrambled
243	63	3	469.2986946	121.1085867	63	0.25806291	15.25824772	0.032512871	486.9109168	601.4678731	173.7177531	63	0.288822996	21.88637967	0.036388277	624.0402475	Flank	FPKIVITGPH
244	63	4	729.3137615	176.6540154	53	0.242219501	24.26529518	0.033271407	721.8756759	892.2112146	233.5338704	53	0.261747293	32.07834414	0.035953756	883.1117794	Flank	YPKIVITGPH
245	63	5	4840.255451	1140.603133	45	0.235649367	170.031076	0.035128534	4670.751317	5905.634358	1535.304323	45	0.259972804	228.8696554	0.038754457	5698.821009	Flank	IPKIVITGPH
246	63	6	2848.345188	567.1130023	46	0.199102624	83.61625042	0.02935608	2896.237842	3775.124275	880.7544266	46	0.23330475	129.8601555	0.034398909	3838.599981	Flank	VPKIVITGPH
247	63	7	605.0300897	239.8416781	58	0.39641281	31.4927552	0.052051552	573.5472881	895.2635254	375.4393644	58	0.419361846	49.29760369	0.055064908	848.6783978	Flank	TPKIVITGPH
248	63	8	174.2991397	125.5401156	45	0.720256657	18.71441549	0.107369523	146.15785	232.4737944	170.2943383	45	0.732531332	25.3859811	0.109199324	194.9399753	Flank	QPKIVITGPH
249	63	9	363.4912022	112.5517035	88	0.309640791	11.9980519	0.033007819	360.7594945	464.8545437	152.5427228	88	0.328151515	16.26110889	0.034981069	461.3610706	Flank	APKIVITGPH
250	63	10	75.27520209	40.8662565	54	0.542891356	5.561193118	0.073878156	71.10894871	95.5164269	52.99995391	54	0.554877895	7.212380193	0.075509317	90.22988332	Flank	GPKIVITGPH
251	63	11	615.8440511	192.3792079	61	0.312382993	24.63163355	0.039996544	603.3025623	768.8894703	260.135776	61	0.33832662	33.30697312	0.043318285	753.2312551	Flank	NPKIVITGPH
252	63	12	-32.74745371	14.85604503	55	-0.453654967	2.003188704	-0.061170823	-34.10787372	-42.52529557	20.02349291	55	-0.470860758	2.699967233	-0.063490852	-44.29191423	Flank	EPKIVITGPH
253	63	13	700.0051639	264.9317098	49	0.378471079	37.84738711	0.054067297	689.6591592	1034.843049	421.3688479	49	0.407181406	60.1955497	0.058168772	1019.548174	Flank	RPKIVITGPH
254	63	14	93.114111	30.76358076	66	0.330385808	3.786735024	0.040667682	92.50631862	142.7164806	51.47190964	66	0.360658485	6.335754101	0.044393991	141.7849141	Flank	HPKIVITHPH
255	63	15	171.346857	49.57398291	34	0.289319476	8.501867929	0.049617881	169.2816314	217.0102591	68.8538011	34	0.317283622	11.80832947	0.054413692	214.3946574	Flank	HPKIVITSPH
256	63	16	90.06288027	31.3536849	71	0.348131048	3.720997816	0.041315554	90.35188423	123.5472223	45.47212794	71	0.368054636	5.39654874	0.043680049	123.9436746	Flank	HPKIVITTPH
257	63	17	605.6419833	130.7887907	45	0.215950668	19.49684178	0.032192025	583.8636388	753.2278783	181.0496879	45	0.240365091	26.98929396	0.035831512	726.1424769	Flank	HPKIVITAPH
258	63	18	18.39498713	20.51653324	42	1.11533284	3.165769809	0.172099594	14.92449239	24.15963881	27.13645762	42	1.123214541	4.187246316	0.173315766	19.60155465	Flank	HPKIVITDPH
259	63	19	50.72342369	25.65400873	65	0.505762562	3.181988164	0.062732125	48.8565116	64.40820224	33.97661521	65	0.527520006	4.214280449	0.065430804	62.03761204	Flank	HPKIVITNPH
260	63	20	426.9408172	171.8955742	53	0.402621551	23.61167301	0.055304323	398.1097534	608.5325442	270.5792673	53	0.44464223	37.16692075	0.061076307	567.4386972	Flank	HPKIVITKPH
261	63	21	156.421526	62.91795584	71	0.402233359	7.466987596	0.047736317	153.1993464	NA	NA	71	NA	NA	NA	NA	Flank	HPKIVITQPH
262	63	22	87.16309045	38.82304369	61	0.44540692	4.970781384	0.057028512	89.19686503	114.5218505	53.21400976	61	0.464662504	6.813355779	0.059493937	117.1939865	Flank	HPKIVITEPH
263	63	23	-3.671489301	25.640162	45	-6.983586196	3.822209679	-1.041051564	-7.060201893	-4.863528852	33.9686868	45	-6.984370368	5.063752853	-1.041168462	-9.352470564	Flank	HPKIVITGFH
264	63	24	17.9666054	19.05085363	51	1.060347974	2.667653092	0.148478415	18.5625615	23.15832841	24.67614315	51	1.065540773	3.45535118	0.149205552	23.92649507	Flank	HPKIVITGDH
265	63	25	-21.93604158	19.89255341	32	-0.906843349	3.516539853	-0.16030877	-23.10285569	-30.02075395	27.5039047	32	-0.916163023	4.86204938	-0.161956272	-31.6176072	Flank	HPKIVITGYH
266	63	26	-8.892485565	23.72246182	25	-2.667697534	4.744492364	-0.533539507	-14.97862282	-11.54545266	30.82573102	25	-2.669945643	6.165146204	-0.533989129	-19.44731643	Flank	HPKIVITGIH
267	63	27	32.79585079	50.0278219	37	1.52543144	8.224523257	0.250779384	24.65167558	41.11674922	62.85812143	37	1.528771672	10.33381151	0.251328515	30.90624997	Flank	HPKIVITGVH
268	63	28	-11.17406821	19.7501977	55	-1.767502876	2.663116114	-0.238330039	-13.64514946	-12.92116644	22.86728965	55	-1.769754284	3.083424708	-0.238633619	-15.77860846	Flank	HPKIVITGLH
269	63	29	3.059713492	50.00209253	21	16.34208322	10.91135114	3.566134923	-9.618037295	3.678718153	60.11941056	21	16.34248889	13.11913093	3.566223447	-11.56384364	Flank	HPKIVITGEH
270	63	30	1.152793037	24.51893237	48	21.26915377	3.539003051	3.069937914	-5.297554162	1.499734504	31.89855811	48	21.26947004	4.604160277	3.069983563	-6.8918917	Flank	HPKIVITGSH
271	63	31	18.69239261	32.22291021	43	1.723851563	4.913947738	0.262884899	12.16106481	25.17238631	43.48860045	43	1.72763122	6.631949395	0.263461291	16.37687736	Flank	HPKIVITGTH
272	63	32	77.58986342	38.95919191	54	0.502117032	5.301674498	0.068329473	75.26371768	108.5015075	56.3346774	54	0.519206403	7.666178581	0.070655042	105.24863	Flank	HPKIVITGRH
273	63	33	36.68692399	23.72430459	45	0.646669222	3.536610519	0.096399756	35.08983347	44.32044723	29.58328753	45	0.667486214	4.410016127	0.09950297	42.39104682	Flank	HPKIVITGAH
274	63	34	446.1900088	158.7440328	49	0.355776754	22.67771897	0.050825251	476.4641799	568.2261887	215.3098904	49	0.378915817	30.75855577	0.054130831	606.7805635	Flank	HPKIVITGPT
275	63	35	291.8874915	100.8672371	33	0.345568892	17.5587322	0.060155823	303.2757089	379.2127616	141.958205	33	0.374349757	24.71175158	0.065165928	394.0080424	Flank	HPKIVITGPF
276	63	36	826.0528006	280.4990411	56	0.339565511	37.48326104	0.04537635	809.3666341	1058.919536	373.6308023	56	0.352841542	49.92851612	0.047150434	1037.529489	Flank	HPKIVITGPD
277	63	37	419.7081332	122.2756365	40	0.291334923	19.33347568	0.046064096	414.4986776	528.2025558	167.2770311	40	0.316691067	26.44882092	0.050073254	521.6464577	Flank	HPKIVITGPA
278	63	38	674.9695004	247.6868656	54	0.366960086	33.70591315	0.049936943	673.4939231	905.6749023	349.7021999	54	0.38612332	47.58844176	0.052544728	903.6949708	Flank	HPKIVITGPG
279	63	39	505.2640628	177.4981486	52	0.35129779	24.61456447	0.048716238	452.8072853	645.6397255	239.740434	52	0.37132231	33.24601645	0.051493139	578.6090737	Flank	HPKIVITGPI
280	63	40	574.5176654	168.3201521	39	0.29297646	26.9527952	0.04691378	558.4948024	804.3379898	260.8023584	39	0.324244735	41.76180016	0.051920711	781.9056118	Flank	HPKIVITGPQ
281	63	41	280.1543883	113.9436188	44	0.406717237	17.17764685	0.061314931	272.1473602	358.0029521	152.42665	44	0.425769254	22.97918209	0.06418713	347.7709521	Flank	HPKIVITGPV
282	63	42	535.3350932	150.6365633	53	0.281387425	20.69152329	0.038651535	539.5455359	732.6346642	221.7241146	53	0.302639399	30.45614943	0.041570719	738.3968799	Flank	HPKIVITGPY
283	63	43	480.007442	185.4763399	27	0.386403051	35.69493827	0.074363302	461.0482352	659.1516443	266.024634	27	0.403586392	51.19646468	0.077670237	633.1166472	Flank	HPKIVITGPS
284	63	44	1.557659212	39.50938602	51	25.36458919	5.532420638	3.551752909	-8.477990869	1.842054993	46.72339491	51	25.36482086	6.542583935	3.551785349	-10.02589352	Flank	HSKIVITGPH
285	63	45	-20.5084096	34.83503566	36	-1.698573237	5.805839277	-0.283095539	-27.60823379	-26.78770117	45.59960716	36	-1.702259065	7.599934527	-0.283709844	-36.06135879	Flank	HFKIVITGPH
286	63	46	-27.26846749	20.57433221	57	-0.754510029	2.725136874	-0.099937295	-30.85663843	-43.36239043	33.5188516	57	-0.772993631	4.439680352	-0.102385508	-49.06830951	Flank	HYKIVITGPH
287	63	47	-11.21603667	22.44075479	24	-2.000774021	4.58069989	-0.408406287	-12.94215733	-14.47655466	29.01389756	24	-2.004199082	5.92243704	-0.409105425	-16.70446107	Flank	HIKIVITGPH
288	63	48	195.9811998	83.87695631	50	0.427984707	11.86199292	0.060526178	179.8215435	254.3409945	114.8940973	50	0.451732516	16.24847906	0.063884625	233.3692734	Flank	HPKFVITGPH
