# Supplementary material for: Quantitative mapping of protein-peptide affinity landscapes using spectrally encoded beads
Source: eLife journal article supplement (doi:10.7554/elife.40499), 2019-07-08
Supplement: supp [file elife-40499-supp-v1.zip › elife_poa_e40499_Figure_3_source_data_5.csv]

	conc	code	AVG	SD	N	CV	SEM	RSEM	MED	AVG_NORM	SD_NORM	N_NORM	CV_NORM	SEM_NORM	RSEM_NORM	MED_NORM	library	sequence
1	1000	1	12.14480639	16.34722523	72	1.346026005	1.926538969	0.158630686	11.63200109	14.5452859	19.61609789	72	1.348622366	2.311779306	0.15893667	13.93112217	Pos1to6	SFRIEITPSHEL
2	1000	2	51.03140996	52.65031026	99	1.031723605	5.291555279	0.103692124	48.45312806	73.96556751	77.53754785	99	1.048292475	7.792816769	0.105357358	70.22857328	Pos1to6	SHRIEITPSHEL
3	1000	3	35.457875	22.00605755	91	0.620625392	2.306861645	0.065059219	35.39238244	45.43526627	28.47169868	91	0.626643157	2.984645	0.065690052	45.35134494	Pos1to6	SLRIEITPSHEL
4	1000	4	16.59145294	24.54877007	59	1.479603393	3.195977641	0.192627954	11.85138829	19.18007754	28.44935287	59	1.483276217	3.703790268	0.193106115	13.70046054	Pos1to6	SYRIEITPSHEL
5	1000	5	126.1501066	77.2277887	117	0.612189643	7.139711591	0.056596953	123.9639778	179.1553845	114.3650399	117	0.638356699	10.57305168	0.059016098	176.0506963	Pos1to6	SKRIEITPSHEL
6	1000	6	9.299085845	51.27190383	138	5.51364991	4.364554298	0.469353049	11.58929042	11.69184969	64.47397029	138	5.514437152	5.488388827	0.469420064	14.57135075	Pos1to6	SARIEITPSHEL
7	1000	7	-0.775910272	26.92425315	114	-34.70021484	2.521687348	-3.249972887	-0.646061318	-1.048121077	36.37028485	114	-34.70046128	3.406389275	-3.249995969	-0.872717515	Pos1to6	SPEIEITPSHEL
8	1000	8	8.659607577	30.89089049	106	3.567239071	3.000388521	0.346480888	9.239382842	12.65048222	45.19142194	106	3.572308244	4.389378923	0.346973249	13.49745325	Pos1to6	SPGIEITPSHEL
9	1000	9	134.5438089	128.9208096	91	0.958206927	13.51457298	0.100447379	97.60122785	185.9289024	180.9936675	91	0.973456333	18.97329171	0.102045951	134.8771773	Pos1to6	SPLIEITPSHEL
10	1000	10	93.16036577	128.865567	113	1.383266005	12.12265281	0.13012672	57.18027725	123.0659766	171.0445794	113	1.389860822	16.09052053	0.130747108	75.53584192	Pos1to6	SPVIEITPSHEL
11	1000	11	311.1022002	282.9507632	97	0.909510646	28.72929723	0.092346815	217.6635999	448.8732733	415.8151942	97	0.926353202	42.21963628	0.094056917	314.0555499	Pos1to6	SPYIEITPSHEL
12	1000	12	126.3636902	84.82391766	123	0.671268127	7.648315085	0.060526209	117.4109128	180.0343407	124.4134864	123	0.691054195	11.21798629	0.062310258	167.279036	Pos1to6	SPKIEITPSHEL
13	1000	13	29.37926135	58.30820779	134	1.984672354	5.037061966	0.171449578	28.70088895	42.8707063	85.35826394	134	1.991062693	7.373830908	0.172001619	41.88081401	Pos1to6	SPSIEITPSHEL
14	1000	14	24.13020987	30.29452795	123	1.255460608	2.731565595	0.113201071	19.56632013	38.42319681	48.81474722	123	1.270449918	4.401477529	0.114552611	31.15598966	Pos1to6	SPAIEITPSHEL
15	1000	15	679.4606642	497.3295785	110	0.731947565	47.41851477	0.069788462	514.8779454	947.3914912	716.5315311	110	0.756320421	68.31860089	0.072112323	717.9090861	Pos1to6	SPRFEITPSHEL
16	1000	16	33.21078134	57.97385439	99	1.745633558	5.826591596	0.175442774	23.03590704	44.90267287	79.10475414	99	1.761693661	7.950326928	0.177056875	31.14572305	Pos1to6	SPRHEITPSHEL
17	1000	17	132.6267553	74.47675315	92	0.561551498	7.764738272	0.058545791	123.5151089	180.5690131	105.9202191	92	0.586591338	11.04294621	0.061156375	168.1636654	Pos1to6	SPRLEITPSHEL
18	1000	18	54.20318914	50.48266115	100	0.931359611	5.048266115	0.093135961	45.74274358	69.0548533	65.27257315	100	0.945227888	6.527257315	0.094522789	58.27624716	Pos1to6	SPRYEITPSHEL
19	1000	19	23.667616	36.68218745	119	1.549889412	3.36265061	0.142078129	16.27794882	34.71535282	54.16208632	119	1.56017675	4.965030312	0.143021168	23.87628463	Pos1to6	SPRAEITPSHEL
20	1000	20	33.4029799	34.90776334	98	1.045049377	3.526216596	0.105565929	33.83657501	49.41594042	52.54899709	98	1.063401741	5.308250313	0.107419797	50.05739547	Pos1to6	SPRKEITPSHEL
21	1000	21	465.5297705	1023.156661	132	2.197832932	89.05435657	0.191296803	319.9586852	711.7660282	1570.693429	132	2.206755263	136.7113152	0.192073392	489.1969043	Pos1to6	SPRIDITPSHEL
22	1000	22	12913.95519	8391.259081	120	0.649782267	766.0136474	0.059316734	11240.48125	18130.69254	12156.9408	120	0.670517178	1109.771785	0.061209564	15781.19998	Pos1to6	SPRIRITPSHEL
23	1000	23	15142.128	12341.35393	107	0.815034316	1193.083717	0.078792341	11312.51383	21874.28187	18300.62045	107	0.836627257	1769.187756	0.08087981	16342.03041	Pos1to6	SPRIHITPSHEL
24	1000	24	5818.315045	4257.218483	99	0.731692672	427.8665564	0.07353788	4965.79853	8411.680665	6330.976421	99	0.75264108	636.2870711	0.075643275	7179.176644	Pos1to6	SPRINITPSHEL
25	1000	25	3159.631392	1317.038176	115	0.416832855	122.8144431	0.038869864	3172.59256	4297.097663	1889.192234	115	0.439643774	176.1680842	0.040996993	4314.724847	Pos1to6	SPRIFITPSHEL
26	1000	26	6016.560332	3065.072483	88	0.509439333	326.7378245	0.054306415	5597.476329	9109.940892	4878.053253	88	0.535464863	520.002224	0.057080746	8475.387212	Pos1to6	SPRIVITPSHEL
27	1000	27	10511.72193	9300.273978	98	0.884752664	939.4695424	0.089373515	7127.27584	14727.00013	13238.96998	98	0.898959046	1337.337922	0.090808577	9985.366143	Pos1to6	SPRILITPSHEL
28	1000	28	1665.365362	1266.832493	106	0.760693432	123.0456491	0.073885078	1339.558756	3224.977533	2539.832457	106	0.787550435	246.6903359	0.07649366	2594.053527	Pos1to6	SPRIAITPSHEL
29	1000	29	300.5384718	259.4095229	107	0.863149138	25.07806514	0.083443777	240.9576847	426.1798429	375.4324746	107	0.880924992	36.29442724	0.085162233	341.6910573	Pos1to6	SPRIGITPSHEL
30	1000	30	-11.54920863	157.5209169	122	-13.63910913	14.26127373	-1.234826921	5.500558238	-16.74089776	228.3480538	122	-13.64013191	20.6736614	-1.234919519	7.973211504	Pos1to6	SPRIEETPSHEL
31	1000	31	377.3648647	347.5093666	100	0.920884266	34.75093666	0.092088427	324.9549057	522.5526708	491.5642862	100	0.940698065	49.15642862	0.094069806	449.978442	Pos1to6	SPRIEFTPSHEL
32	1000	32	22.67226699	33.62920199	87	1.483274787	3.605428899	0.159023749	19.99817029	33.70392711	50.60014272	87	1.501312964	5.424904728	0.160957645	29.72869339	Pos1to6	SPRIEHTPSHEL
33	1000	33	14.39533534	39.18362683	114	2.721966935	3.669882893	0.254935561	15.48432662	21.93858267	59.88084719	114	2.729476562	5.608355186	0.255638902	23.5982123	Pos1to6	SPRIEQTPSHEL
34	1000	34	120.6195743	77.07197605	134	0.638967402	6.65800466	0.055198376	110.71899	188.5953593	126.6579025	134	0.671585467	10.94157629	0.058016148	173.1152495	Pos1to6	SPRIERTPSHEL
35	1000	35	157.9626357	110.8093367	99	0.701490806	11.13675736	0.070502479	139.2753769	243.1965952	176.4209027	99	0.725425052	17.73096786	0.072907961	214.4260085	Pos1to6	SPRIEYTPSHEL
36	1000	36	22.20105614	23.34053926	90	1.051325627	2.460308863	0.110819451	19.8005186	31.92133925	34.14205101	90	1.069568252	3.598888172	0.112742393	28.46977492	Pos1to6	SPRIEATPSHEL
37	1000	37	1039.556752	510.0616249	101	0.490652987	50.75302861	0.048821797	924.7536375	1476.650875	767.582797	101	0.519813322	76.37734296	0.051723359	1313.577413	Pos1to6	SPRIEITPSHEL
38	1000	38	531.6259572	304.1188974	68	0.572054267	36.87983343	0.06937177	455.470588	768.3942952	465.8510853	68	0.606265674	56.49274207	0.073520512	658.3218834	Pos1to6	SPRIEISPSHEL
39	1000	39	34.20500227	82.39373279	104	2.408821147	8.079370217	0.236204347	23.49691669	52.01153594	125.6719943	104	2.416233093	12.32315291	0.236931148	35.72900587	Pos1to6	SPRIEIEPSHEL
40	1000	40	418.0487322	200.3525577	74	0.479256465	23.29051175	0.055712432	420.2069259	584.5535174	295.9201686	74	0.506232808	34.40002086	0.058848369	587.5712988	Pos1to6	SPRIEIFPSHEL
41	1000	41	847.6657907	765.9109621	72	0.903552993	90.26347251	0.106484741	531.2457843	1204.65853	1111.963389	72	0.923052767	131.0461422	0.108782812	754.9788757	Pos1to6	SPRIEIHPSHEL
42	1000	42	190.3052945	131.0350841	90	0.688551963	13.81231063	0.07257975	173.4912884	269.9541755	191.5875471	90	0.709703959	20.19510068	0.074809366	246.1029675	Pos1to6	SPRIEIKPSHEL
43	1000	43	101.7668449	65.02698666	86	0.63898008	7.012040305	0.068902994	85.51525764	142.6642568	95.72680962	86	0.670993645	10.32248735	0.072355106	119.8815851	Pos1to6	SPRIEILPSHEL
44	1000	44	492.2359851	197.6488116	83	0.401532634	21.69477554	0.044073932	501.4340069	626.6122314	262.9053478	83	0.419566256	28.85761095	0.04605338	638.321235	Pos1to6	SPRIEIYPSHEL
45	1000	45	77.89966832	61.04165588	93	0.783593271	6.329724852	0.081254837	74.8773902	119.1063364	96.49199373	93	0.810133169	10.00575364	0.084006896	114.4853607	Pos1to6	SPRIEINPSHEL
46	1000	46	50.48349999	65.2387449	95	1.292278564	6.693353998	0.132584983	46.45567262	73.5398489	96.06395964	95	1.306284431	9.855954301	0.134021955	67.67247012	Pos1to6	SPRIEIAPSHEL
47	1000	47	21.04411139	51.42987548	117	2.443908157	4.75469367	0.225939389	14.23011301	30.78615936	75.50986219	117	2.452721085	6.980889229	0.226754145	20.81772515	Pos1to6	Scrambled
48	1000	48	-6.544315628	190.2147875	60	-29.06564999	24.55662347	-3.752359279	16.38354206	-9.498611423	276.089012	60	-29.06624976	35.64293819	-3.752436709	23.77955292	Pos1to6	SPRIEIPPSHEL
49	125	1	-4.737702278	8.298814172	57	-1.751653794	1.09920479	-0.232012213	-6.049432144	-5.674131967	9.950439861	57	-1.753649707	1.317967956	-0.232276578	-7.245131563	Pos1to6	SFRIEITPSHEL
50	125	2	0.075666249	6.286658532	59	83.08405166	0.818453228	10.8166222	-0.660226259	0.109671613	9.111984701	59	83.08425906	1.186279365	10.81664921	-0.956940244	Pos1to6	SHRIEITPSHEL
51	125	3	-1.94073711	5.197608261	71	-2.678161938	0.616842615	-0.317839347	-1.977174794	-2.486835643	6.663632435	71	-2.679562863	0.790827675	-0.318005606	-2.533526423	Pos1to6	SLRIEITPSHEL
52	125	4	-3.623160292	18.05976858	39	-4.984534804	2.8918774	-0.798164356	-5.930671489	-4.188451464	20.88205367	39	-4.985626275	3.343804702	-0.798339131	-6.85598419	Pos1to6	SYRIEITPSHEL
53	125	5	29.47239603	20.0771447	85	0.681218611	2.177672095	0.073888533	27.44518409	41.85599668	29.50126071	85	0.704827577	3.199860996	0.076449284	38.97699845	Pos1to6	SKRIEITPSHEL
54	125	6	-5.478002471	5.31985587	84	-0.971130608	0.580443862	-0.105959036	-6.438611224	-6.887556748	6.719433584	84	-0.975590304	0.73315031	-0.106445629	-8.0953414	Pos1to6	SARIEITPSHEL
55	125	7	-9.05162327	6.250830468	89	-0.690575633	0.662586704	-0.073200871	-9.775318672	-12.22718331	8.593876579	89	-0.702850065	0.910949095	-0.074501958	-13.20477109	Pos1to6	SPEIEITPSHEL
56	125	8	-7.294286713	7.288729124	76	-0.99923809	0.83607457	-0.11462047	-8.379891787	-10.65593834	10.83907655	76	-1.017186493	1.24332735	-0.116679293	-12.24185636	Pos1to6	SPGIEITPSHEL
57	125	9	15.91497187	40.13086196	63	2.521579194	5.056013364	0.317689117	4.043206329	21.99323237	55.58598957	63	2.527413372	7.003176418	0.318424154	5.587391357	Pos1to6	SPLIEITPSHEL
58	125	10	40.00652807	116.0183235	80	2.899984806	12.9712429	0.324228158	3.802797727	52.84911032	153.4281684	80	2.903136259	17.15379071	0.324580501	5.023542064	Pos1to6	SPVIEITPSHEL
59	125	11	46.49114638	127.2025054	103	2.736058697	12.53363528	0.269591874	14.90151613	67.07967042	183.9125641	103	2.741703454	18.1214434	0.270148069	21.50062686	Pos1to6	SPYIEITPSHEL
60	125	12	-0.675088481	9.592381148	106	-14.20907248	0.931694419	-1.380107121	-1.972500774	-0.961819881	13.66748067	106	-14.21002096	1.327503075	-1.380199246	-2.810284155	Pos1to6	SPKIEITPSHEL
61	125	13	-4.275339965	7.036199371	85	-1.645763712	0.763182975	-0.178508138	-4.129473021	-6.238647111	10.31538084	85	-1.65346439	1.118860144	-0.179343394	-6.025795643	Pos1to6	SPSIEITPSHEL
62	125	14	-4.096694361	11.59241389	90	-2.829699478	1.221947716	-0.298276515	-6.805237594	-6.5232791	18.50250905	90	-2.836381637	1.950335701	-0.298980876	-10.83616698	Pos1to6	SPAIEITPSHEL
63	125	15	20.1205781	14.79650631	71	0.735391709	1.75602223	0.087274939	15.6131737	28.05469911	21.31186637	71	0.75965407	2.52925321	0.090154352	21.76989589	Pos1to6	SPRFEITPSHEL
64	125	16	-3.530857558	17.17650229	83	-4.864682872	1.885366063	-0.533968316	-1.720270912	-4.773899784	23.25113052	83	-4.870468918	2.552143135	-0.534603417	-2.325894149	Pos1to6	SPRHEITPSHEL
65	125	17	-0.638767405	5.954569388	85	-9.321968124	0.645863732	-1.011109407	-1.569087091	-0.869670676	8.108383255	85	-9.323510016	0.879477646	-1.011276648	-2.136284694	Pos1to6	SPRLEITPSHEL
66	125	18	-2.057029307	5.930901258	77	-2.88323615	0.675888926	-0.328575254	-2.115328103	-2.62065497	7.567785349	77	-2.887745787	0.862429181	-0.329089175	-2.694927626	Pos1to6	SPRYEITPSHEL
67	125	19	-5.862009371	6.835555441	94	-1.166077194	0.705033711	-0.120271679	-5.417583459	-8.598319472	10.14357682	94	-1.179716205	1.046230064	-0.121678436	-7.946441296	Pos1to6	SPRAEITPSHEL
68	125	20	-0.915192346	4.612537707	82	-5.039965345	0.509369578	-0.556571064	-1.412660897	-1.353923829	6.82892467	82	-5.043802706	0.754128573	-0.55699483	-2.089872428	Pos1to6	SPRKEITPSHEL
69	125	21	3.490737055	7.901705999	108	2.263621085	0.760342014	0.21781704	2.192111377	5.337119571	12.12745732	108	2.272285108	1.166965125	0.218650736	3.351601781	Pos1to6	SPRIDITPSHEL
70	125	22	8052.329289	5690.271823	118	0.706661591	523.831981	0.065053472	6517.623392	11305.15821	8204.98208	118	0.725773309	755.3298243	0.066812849	9150.490618	Pos1to6	SPRIRITPSHEL
71	125	23	3745.325452	3744.998774	74	0.999912777	435.3472646	0.116237499	2073.379213	5410.488187	5505.659698	74	1.017590189	640.0199397	0.118292457	2995.19865	Pos1to6	SPRIHITPSHEL
72	125	24	364.0738558	288.700907	79	0.792973465	32.48138975	0.089216485	310.3968549	526.3504966	427.5772048	79	0.81234312	48.10619399	0.091395742	448.7483409	Pos1to6	SPRINITPSHEL
73	125	25	875.839578	361.5796497	68	0.41283776	43.84797317	0.050063932	867.5787045	1191.14154	519.1683492	68	0.435857815	62.95841004	0.052855524	1179.906755	Pos1to6	SPRIFITPSHEL
74	125	26	1837.704179	952.6412106	70	0.518386594	113.8624029	0.061959049	1693.438699	2782.549417	1513.663013	70	0.543984234	180.9173338	0.065018552	2564.110654	Pos1to6	SPRIVITPSHEL
75	125	27	2541.190534	2455.584583	80	0.966312659	274.5427026	0.10803704	1682.528066	3560.226725	3486.660461	80	0.979336635	389.8204902	0.109493164	2357.23426	Pos1to6	SPRILITPSHEL
76	125	28	112.0269915	97.30339342	86	0.868570977	10.49249475	0.093660417	82.27643084	216.9401014	193.5510274	86	0.892186489	20.87114404	0.096206943	159.3281853	Pos1to6	SPRIAITPSHEL
77	125	29	12.03982836	11.99145584	98	0.995982291	1.211319963	0.100609405	10.15971346	17.07312921	17.26821166	98	1.011426286	1.744352794	0.102169484	14.40702437	Pos1to6	SPRIGITPSHEL
78	125	30	-6.311176343	7.151458137	91	-1.133141866	0.749676513	-0.118785544	-5.607980423	-9.148224897	10.47825654	91	-1.145386855	1.098419745	-0.120069167	-8.128922936	Pos1to6	SPRIEETPSHEL
79	125	31	9.015835958	9.697882403	61	1.075649829	1.241686605	0.137722848	7.499208467	12.48459939	13.64143205	61	1.092660776	1.746606398	0.139900877	10.38446284	Pos1to6	SPRIEFTPSHEL
80	125	32	-3.858955827	6.805842643	84	-1.763648756	0.742578311	-0.192429855	-4.940381998	-5.736610545	10.20454731	84	-1.778846103	1.113407393	-0.194088022	-7.344226971	Pos1to6	SPRIEHTPSHEL
81	125	33	-6.254463231	5.351574405	69	-0.855640877	0.64425385	-0.103007057	-6.556308543	-9.531841763	8.380758338	69	-0.879238089	1.008924742	-0.105847827	-9.991855939	Pos1to6	SPRIEQTPSHEL
82	125	34	3.846219467	7.884035038	65	2.049814137	0.977894193	0.254248152	2.424644353	6.013776342	12.38967201	65	2.060214964	1.536749679	0.255538216	3.791065219	Pos1to6	SPRIERTPSHEL
83	125	35	0.721150249	6.641988596	95	9.210270121	0.681453651	0.944953776	-0.096409677	1.110270695	10.22795127	95	9.21212396	1.049365659	0.945143976	-0.148430703	Pos1to6	SPRIEYTPSHEL
84	125	36	-4.394016181	5.945397518	67	-1.353066824	0.726345911	-0.165303422	-4.219028763	-6.317847234	8.638326013	67	-1.367289473	1.055339489	-0.167040995	-6.066245118	Pos1to6	SPRIEATPSHEL
85	125	37	51.11398524	30.97292659	80	0.605957967	3.462878466	0.06774816	49.09249423	72.60547434	45.72707499	80	0.629802028	5.112442404	0.070414007	69.73402316	Pos1to6	SPRIEITPSHEL
86	125	38	14.37623438	11.52047663	86	0.801355649	1.242284943	0.086412402	11.8849703	20.77892612	17.16599465	86	0.826125207	1.851056808	0.089083372	17.17813671	Pos1to6	SPRIEISPSHEL
87	125	39	-5.178370365	9.006242787	61	-1.739204065	1.153131226	-0.222682262	-5.722754454	-7.874140578	13.77545691	61	-1.749455293	1.763766522	-0.223994797	-8.701921625	Pos1to6	SPRIEIEPSHEL
88	125	40	20.76485406	14.78257441	66	0.711903602	1.819609125	0.087629276	18.2256081	29.03529552	21.20554072	66	0.730336659	2.610221625	0.089898228	25.48469233	Pos1to6	SPRIEIFPSHEL
89	125	41	50.96132433	32.83179842	57	0.644249318	4.348677935	0.085332907	40.9749409	72.42358337	48.61967188	57	0.671323754	6.43983286	0.088919003	58.23145468	Pos1to6	SPRIEIHPSHEL
90	125	42	3.449379323	9.545668635	84	2.767358339	1.041517835	0.301943549	1.694422019	4.89305541	13.56695955	84	2.772696897	1.480276645	0.302526034	2.403592082	Pos1to6	SPRIEIKPSHEL
91	125	43	1.459664715	6.914977147	49	4.737373641	0.987853878	0.676767663	0.729657365	2.046265481	9.702977061	49	4.741797755	1.38613958	0.677399679	1.022887423	Pos1to6	SPRIEILPSHEL
92	125	44	21.92733869	17.90617037	53	0.816613937	2.45960166	0.112170551	20.3523432	27.91331605	23.04608485	53	0.825630492	3.165623212	0.11340907	25.90836016	Pos1to6	SPRIEIYPSHEL
93	125	45	-5.027307706	12.80287771	53	-2.546666817	1.758610503	-0.34981159	-3.581089042	-7.686607859	19.63895848	53	-2.554957771	2.697618413	-0.35095044	-5.475381413	Pos1to6	SPRIEINPSHEL
94	125	46	-4.251131533	7.105443103	73	-1.67142396	0.831629212	-0.195625378	-3.926645379	-6.19266831	10.41777845	73	-1.68227619	1.219308741	-0.196895535	-5.719985894	Pos1to6	SPRIEIAPSHEL
95	125	47	-4.406765593	5.729072523	82	-1.300062915	0.632670222	-0.143567932	-4.666089872	-6.446810003	8.487580325	82	-1.316555059	0.937296448	-0.145389184	-6.826184472	Pos1to6	Scrambled
96	125	48	-4.404926358	6.064667134	61	-1.376791946	0.776501058	-0.176280145	-5.646429649	-6.393439162	8.883020618	61	-1.389396285	1.137354244	-0.177893965	-8.195393408	Pos1to6	SPRIEIPPSHEL
97	2000	1	6.185538836	11.05779426	75	1.787684881	1.276844098	0.206424069	2.984949035	7.408140399	13.2579089	75	1.78964061	1.530891455	0.206649898	3.574938598	Pos1to6	SFRIEITPSHEL
98	2000	2	73.20909032	61.49431433	79	0.839981948	6.918650902	0.094505353	61.19550631	106.1101764	91.28147213	79	0.860251818	10.26996799	0.096785891	88.69753661	Pos1to6	SHRIEITPSHEL
99	2000	3	33.9321002	26.56148427	79	0.782783385	2.988400458	0.088070012	30.70195371	43.48015801	34.24336696	79	0.787563075	3.852679786	0.088607769	39.34108972	Pos1to6	SLRIEITPSHEL
100	2000	4	5.375261163	18.39412218	47	3.421995996	2.683058475	0.499149417	2.289228593	6.213917871	21.27388008	47	3.423585654	3.103114337	0.499381292	2.646397642	Pos1to6	SYRIEITPSHEL
101	2000	5	142.05402	88.39405191	82	0.622256603	9.761490049	0.068716746	133.8444469	201.7417445	130.7321367	82	0.648017281	14.43694936	0.071561537	190.0827038	Pos1to6	SKRIEITPSHEL
102	2000	6	5.60473085	17.12100529	117	3.054741744	1.582837499	0.282410974	3.64857561	7.046893826	21.53645229	117	3.056162448	1.991045718	0.282542318	4.587396902	Pos1to6	SARIEITPSHEL
103	2000	7	-10.73012092	17.94669117	100	-1.672552557	1.794669117	-0.167255256	-9.827570875	-14.49454439	24.31688491	100	-1.677657762	2.431688491	-0.167765776	-13.27535481	Pos1to6	SPEIEITPSHEL
104	2000	8	5.409855802	14.84090149	89	2.743308146	1.573132412	0.290790082	4.129601705	7.903046882	21.73256157	89	2.749896577	2.303646919	0.291488454	6.032773713	Pos1to6	SPGIEITPSHEL
105	2000	9	113.0227806	1056.675122	87	9.349222489	113.2874643	1.002341862	157.1901673	156.1885434	1460.487475	87	9.350797713	156.5806929	1.002510744	217.2243785	Pos1to6	SPLIEITPSHEL
106	2000	10	119.081503	162.1184397	86	1.361407402	17.48168094	0.146804336	63.77711924	157.3081143	215.2144251	86	1.36810759	23.2071683	0.147526835	84.25035046	Pos1to6	SPVIEITPSHEL
107	2000	11	470.4854324	340.1335075	65	0.722941634	42.18836932	0.089669874	404.3891882	678.8390951	505.0696292	65	0.744019655	62.64617741	0.09228428	583.4722432	Pos1to6	SPYIEITPSHEL
108	2000	12	219.6183532	133.0031967	87	0.605610573	14.25943943	0.064928269	249.1549108	312.8972046	196.3337504	87	0.627470452	21.04918748	0.067271894	354.9788711	Pos1to6	SPKIEITPSHEL
109	2000	13	52.90133524	46.62678174	102	0.881391396	4.616739338	0.087270753	40.75964103	77.19450732	69.14219799	102	0.895688053	6.846097745	0.088686333	59.47714541	Pos1to6	SPSIEITPSHEL
110	2000	14	19.99385073	21.9445375	93	1.097564336	2.275542535	0.11381212	17.37965484	31.8367584	35.48776391	93	1.114678934	3.679909693	0.115586821	27.67410239	Pos1to6	SPAIEITPSHEL
111	2000	15	1835.559073	2486.581475	93	1.354672542	257.8464875	0.140472999	1120.331295	2559.37266	3501.209672	93	1.367995262	363.0585303	0.141854501	1562.110056	Pos1to6	SPRFEITPSHEL
112	2000	16	31.08861979	23.08866934	98	0.742672704	2.332307808	0.075021272	27.28856506	42.03340204	32.77233011	98	0.77967351	3.310505265	0.078758918	36.89553394	Pos1to6	SPRHEITPSHEL
113	2000	17	242.089326	164.8066431	107	0.680767904	15.93245955	0.065812317	208.1860368	329.600393	231.2362884	107	0.701565573	22.35445576	0.067822904	283.4416563	Pos1to6	SPRLEITPSHEL
114	2000	18	75.31707396	103.4023088	90	1.372893335	10.89956037	0.144715664	85.21332864	95.9539388	132.6408729	90	1.382339012	13.98157564	0.145711326	108.5617655	Pos1to6	SPRYEITPSHEL
115	2000	19	10.5835716	16.60672294	103	1.56910385	1.636309033	0.154608396	7.962017535	15.52384583	24.51628238	103	1.57926603	2.415661082	0.155609706	11.67858427	Pos1to6	SPRAEITPSHEL
116	2000	20	36.93410718	33.18077636	86	0.898377648	3.577975132	0.096874553	38.04712315	54.63984487	50.25016726	86	0.919661602	5.41861489	0.099169661	56.28642642	Pos1to6	SPRKEITPSHEL
117	2000	21	1304.895946	1925.976064	100	1.475961413	192.5976064	0.147596141	862.4865192	1995.104639	2971.139735	100	1.48921499	297.1139735	0.148921499	1318.688176	Pos1to6	SPRIDITPSHEL
118	2000	22	12770.66226	8233.312419	115	0.644705204	767.7603418	0.06011907	10737.8202	17929.51482	11933.85452	115	0.665598296	1112.837672	0.062067361	15075.48336	Pos1to6	SPRIRITPSHEL
119	2000	23	18046.99773	17390.53399	92	0.963624767	1813.088503	0.100464827	9915.606967	26070.64974	25600.22215	92	0.981955663	2669.00766	0.102375955	14324.0621	Pos1to6	SPRIHITPSHEL
120	2000	24	8390.645618	6055.652817	60	0.721714763	781.781417	0.093172975	7209.183632	12130.56202	9012.335139	60	0.742944566	1163.487463	0.095913731	10422.49347	Pos1to6	SPRINITPSHEL
121	2000	25	4348.010515	1876.253067	94	0.431519901	193.5207277	0.044507879	4196.994372	5913.292882	2682.227176	94	0.453592817	276.6506097	0.046784527	5707.910977	Pos1to6	SPRIFITPSHEL
122	2000	26	7140.653897	3228.791176	71	0.452170239	383.1870146	0.053662735	7260.487509	10811.98082	5203.833554	71	0.481302514	617.5814215	0.0571201	10993.42621	Pos1to6	SPRIVITPSHEL
123	2000	27	12952.51294	11990.05401	77	0.925693266	1366.393466	0.105492538	8361.960739	18146.56639	17044.7184	77	0.939280635	1942.425935	0.107040963	11715.16881	Pos1to6	SPRILITPSHEL
124	2000	28	2704.072979	2338.354129	74	0.864752596	271.828146	0.100525447	2116.761509	5236.43328	4652.411815	74	0.888469606	540.831888	0.103282494	4099.105497	Pos1to6	SPRIAITPSHEL
125	2000	29	524.8888037	611.2070659	91	1.164450569	64.07190993	0.122067587	355.2351889	744.3207737	876.5771718	91	1.177687366	91.89025575	0.123455181	503.7427524	Pos1to6	SPRIGITPSHEL
126	2000	30	-231.5009859	2427.323136	111	-10.48515248	230.3913163	-0.995206631	0.545392431	-335.5670905	3518.918547	111	-10.48648287	334.0009675	-0.995332907	0.790561434	Pos1to6	SPRIEETPSHEL
127	2000	31	815.8986162	698.041411	76	0.855549203	80.07084128	0.098138224	565.4715556	1129.808419	990.6619031	76	0.87684061	113.6367138	0.100580516	783.0317533	Pos1to6	SPRIEFTPSHEL
128	2000	32	-172.3396752	1637.082207	68	-9.499160332	198.5253781	-1.151942394	22.40023451	-256.1951063	2434.364276	68	-9.501993661	295.2100306	-1.152285986	33.2995316	Pos1to6	SPRIEHTPSHEL
129	2000	33	-21.98542596	196.2355059	79	-8.925708614	22.07821934	-1.004220677	7.678305931	-33.50592906	299.1409883	79	-8.9280016	33.65599066	-1.004478658	11.7017871	Pos1to6	SPRIEQTPSHEL
130	2000	34	181.9571078	121.6325535	79	0.668468272	13.68473143	0.075208557	156.5919333	284.4999771	199.0681796	79	0.699712463	22.39692003	0.078723803	244.8401273	Pos1to6	SPRIERTPSHEL
131	2000	35	287.5937314	220.4139208	99	0.76640725	22.15243254	0.077026827	248.9878365	442.7744319	349.0714748	99	0.788373153	35.08300324	0.079234483	383.3374508	Pos1to6	SPRIEYTPSHEL
132	2000	36	11.23384345	21.21846626	64	1.888798465	2.652308283	0.236099808	9.135132948	16.15235445	30.67353081	64	1.899012984	3.834191351	0.237376623	13.13476602	Pos1to6	SPRIEATPSHEL
133	2000	37	1674.346394	858.2029339	84	0.512559968	93.63761681	0.055924877	1546.104343	2378.345448	1285.590333	84	0.540539783	140.2694051	0.058977726	2196.182486	Pos1to6	SPRIEITPSHEL
134	2000	38	1152.839942	772.072258	82	0.669713314	85.26111769	0.073957463	875.7148455	1666.276115	1164.997422	82	0.699162289	128.6524432	0.077209558	1265.728812	Pos1to6	SPRIEISPSHEL
135	2000	39	39.07861529	33.93765653	64	0.868445729	4.242207066	0.108555716	38.08117585	59.42226776	52.81436402	64	0.888797517	6.601795502	0.11109969	57.90557856	Pos1to6	SPRIEIEPSHEL
136	2000	40	759.0325367	382.7887363	58	0.504311367	50.2626235	0.066219327	680.8070406	1061.347888	562.529251	58	0.530014011	73.86370933	0.069594249	951.9659301	Pos1to6	SPRIEIFPSHEL
137	2000	41	2083.022065	1706.958202	71	0.819462372	202.5786685	0.097252291	1449.506334	2960.282609	2489.344187	71	0.840914371	295.4308022	0.099798175	2059.963006	Pos1to6	SPRIEIHPSHEL
138	2000	42	355.325818	193.966182	59	0.545882602	25.252246	0.071067861	348.3691093	504.0410906	288.4787579	59	0.572331826	37.55673533	0.074511257	494.1727758	Pos1to6	SPRIEIKPSHEL
139	2000	43	155.5974849	101.388405	66	0.651606966	12.48004994	0.080207273	134.0362422	218.1280118	148.9877501	66	0.683028965	18.33912429	0.084075054	187.9018741	Pos1to6	SPRIEILPSHEL
140	2000	44	915.5998038	495.1659404	53	0.540810448	68.01627282	0.074286028	880.649957	1165.550779	646.1014238	53	0.554331424	88.74885594	0.076143277	1121.059921	Pos1to6	SPRIEIYPSHEL
141	2000	45	153.4634625	111.0750424	70	0.723788194	13.27600684	0.086509236	129.7949143	234.6411888	176.5535306	70	0.752440488	21.10218308	0.08993384	198.4526643	Pos1to6	SPRIEINPSHEL
142	2000	46	53.53694058	193.1385933	85	3.607576212	20.94882173	0.39129658	62.86351629	77.98782812	281.74015	85	3.612616953	30.55900987	0.391843325	91.57394971	Pos1to6	SPRIEIAPSHEL
143	2000	47	13.87578971	20.94978111	88	1.509808201	2.23325417	0.160946095	9.274646065	20.29937333	30.93690058	88	1.524032298	3.297884683	0.162462389	13.56820093	Pos1to6	Scrambled
144	2000	48	33.12970641	22.69980674	69	0.685179834	2.7327356	0.082485959	27.57561759	48.08542644	34.14869015	69	0.710167148	4.111019195	0.085494078	40.02405922	Pos1to6	SPRIEIPPSHEL
145	250	1	-1.393676211	27.26171387	74	-19.5610097	3.169109866	-2.273921189	-2.584469207	-1.669143031	32.65042151	74	-19.56118853	3.795534404	-2.273941978	-3.095302002	Pos1to6	SFRIEITPSHEL
146	250	2	11.70353532	16.71386948	76	1.428104331	1.917212316	0.163814802	7.986810615	16.96325131	24.42911679	76	1.440119959	2.802211878	0.165193089	11.57618377	Pos1to6	SHRIEITPSHEL
147	250	3	5.964596993	8.574432799	92	1.437554425	0.893946415	0.149875409	4.020594736	7.642958089	11.00710287	92	1.440162662	1.147569802	0.150147337	5.15193853	Pos1to6	SLRIEITPSHEL
148	250	4	-0.761688866	7.814049283	54	-10.25884666	1.06335742	-1.396052204	-0.660202991	-0.880528762	9.033676554	54	-10.25937703	1.22932767	-1.396124377	-0.763208901	Pos1to6	SYRIEITPSHEL
149	250	5	36.44174257	22.58722832	104	0.61981746	2.214859961	0.060778102	34.22354729	51.75369707	33.41609219	104	0.64567546	3.276717425	0.063313688	48.60346883	Pos1to6	SKRIEITPSHEL
150	250	6	-3.126989858	17.35394983	99	-5.54973013	1.744137583	-0.557768865	-1.508323775	-3.93160102	21.82239965	99	-5.550512256	2.193233686	-0.557847471	-1.896433171	Pos1to6	SARIEITPSHEL
151	250	7	-4.999750987	12.69983665	114	-2.540093834	1.189448682	-0.237901584	-7.262447288	-6.75380205	17.17801397	114	-2.543458314	1.608868416	-0.238216697	-9.810314857	Pos1to6	SPEIEITPSHEL
152	250	8	-6.119001411	20.67644347	98	-3.37905519	2.088636199	-0.34133612	-5.454371586	-8.939009982	30.25324113	98	-3.384406237	3.056038851	-0.341876657	-7.968078251	Pos1to6	SPGIEITPSHEL
153	250	9	48.47059762	85.3863701	91	1.761611663	8.950923704	0.184667079	18.30499668	66.98253223	118.5559102	91	1.769952646	12.42803629	0.185541452	25.29605762	Pos1to6	SPLIEITPSHEL
154	250	10	-426.2059448	4732.971684	96	-11.10489364	483.0568997	-1.133388461	12.50236317	-563.0232385	6252.776772	96	-11.10571704	638.171357	-1.133472499	16.51577385	Pos1to6	SPVIEITPSHEL
155	250	11	91.80757602	142.526408	94	1.552447131	14.70047654	0.160122695	42.5936021	132.4644028	206.9589482	94	1.56237407	21.34618563	0.161146581	61.45610537	Pos1to6	SPYIEITPSHEL
156	250	12	11.5817654	12.54689034	103	1.083331418	1.23628184	0.106743816	10.0340041	16.50090699	18.08006995	103	1.095701585	1.781482227	0.107962685	14.29576257	Pos1to6	SPKIEITPSHEL
157	250	13	1.178032276	11.41669069	97	9.691322489	1.159189311	0.984004712	0.244091588	1.71900427	16.66167782	97	9.692633175	1.691737068	0.984137792	0.356182501	Pos1to6	SPSIEITPSHEL
158	250	14	-3.040327631	20.10090411	99	-6.611426974	2.020216875	-0.664473412	-4.533164182	-4.841197303	32.02108148	99	-6.614289704	3.218239777	-0.664761127	-7.218281999	Pos1to6	SPAIEITPSHEL
159	250	15	93.40086808	78.98763752	84	0.845684191	8.618257807	0.09227171	66.66924123	130.2315091	112.8931494	84	0.866865094	12.31765244	0.094582736	92.95883514	Pos1to6	SPRFEITPSHEL
160	250	16	5.013324456	11.92836164	87	2.379331669	1.278854604	0.255091131	2.323834611	6.778270758	16.2077897	87	2.391139316	1.73765745	0.256357043	3.141943101	Pos1to6	SPRHEITPSHEL
161	250	17	14.70078526	13.31964286	88	0.906049753	1.4198787	0.096585228	12.21126323	20.01486261	18.44926858	88	0.921778427	1.966698638	0.09826191	16.6254218	Pos1to6	SPRLEITPSHEL
162	250	18	4.01220621	11.18754981	84	2.788378569	1.220661758	0.304237044	1.618195238	5.111549995	14.27677059	84	2.793041367	1.557723378	0.304745797	2.061580444	Pos1to6	SPRYEITPSHEL
163	250	19	-0.091909727	11.08365699	108	-120.5928613	1.066525391	-11.60405349	-1.733244048	-0.134811998	16.2573825	108	-120.5929939	1.56436736	-11.60406625	-2.542299936	Pos1to6	SPRAEITPSHEL
164	250	20	2.358180247	7.612837968	81	3.228268059	0.845870885	0.358696451	1.979902188	3.488661638	11.28322367	81	3.234255667	1.253691519	0.359361741	2.929041924	Pos1to6	SPRKEITPSHEL
165	250	21	42.07567591	31.13368544	114	0.739944986	2.915936804	0.069302198	34.15478954	64.3310882	49.28020764	114	0.766040324	4.615514327	0.07174625	52.22054622	Pos1to6	SPRIDITPSHEL
166	250	22	12641.76788	8594.384106	119	0.679840366	787.8458993	0.062320864	10849.70348	17748.55211	12418.39716	119	0.699685083	1138.392601	0.064140026	15232.56315	Pos1to6	SPRIRITPSHEL
167	250	23	6652.472687	6555.640894	84	0.98544424	715.2790625	0.107520782	4011.296417	9610.146125	9642.595654	84	1.003376591	1052.09344	0.109477361	5794.709206	Pos1to6	SPRIHITPSHEL
168	250	24	1645.990241	1328.973781	78	0.807400766	150.4766492	0.091420134	1325.003921	2379.648434	1966.618443	78	0.826432348	222.6756897	0.093575037	1915.590645	Pos1to6	SPRINITPSHEL
169	250	25	1607.209129	740.2797171	95	0.460599498	75.95109643	0.047256511	1600.238219	2185.803891	1052.11648	95	0.481340748	107.9448732	0.049384519	2176.323455	Pos1to6	SPRIFITPSHEL
170	250	26	3069.081181	1508.127228	95	0.491393723	154.7305889	0.050415932	2987.700101	4647.03196	2408.678091	95	0.51832613	247.1251578	0.053179139	4523.809256	Pos1to6	SPRIVITPSHEL
171	250	27	5361.897096	4829.519657	81	0.900710993	536.6132952	0.100078999	3692.494981	7512.057471	6871.050212	81	0.914669548	763.4500235	0.10162995	5173.212767	Pos1to6	SPRILITPSHEL
172	250	28	399.7958547	310.4366837	99	0.776488	31.20006064	0.07803998	304.9559379	774.2040747	621.5440326	99	0.802816793	62.46752566	0.080686124	590.5467177	Pos1to6	SPRIAITPSHEL
173	250	29	45.7854884	33.28638552	94	0.727007327	3.433228524	0.07498508	39.29354404	64.92630422	48.56652731	94	0.74802544	5.009254812	0.077152933	55.72037524	Pos1to6	SPRIGITPSHEL
174	250	30	-2.460503413	9.665244176	100	-3.928157191	0.966524418	-0.392815719	-2.742239612	-3.566567841	14.02269954	100	-3.931706942	1.402269954	-0.393170694	-3.974952263	Pos1to6	SPRIEETPSHEL
175	250	31	46.92110098	33.84338595	84	0.721282861	3.69261614	0.078698412	39.31725622	64.97358109	48.49719588	84	0.746414082	5.291477884	0.081440453	54.44422406	Pos1to6	SPRIEFTPSHEL
176	250	32	6.870670549	42.87555606	77	6.24037432	4.886123084	0.711156655	2.139919061	10.21373731	63.78158645	77	6.244686396	7.26858636	0.711648061	3.18114091	Pos1to6	SPRIEHTPSHEL
177	250	33	-0.438964364	11.25645535	83	-25.64320994	1.235556491	-2.814707962	-0.933829663	-0.668984484	17.15544357	83	-25.64400815	1.883054568	-2.814795578	-1.423162349	Pos1to6	SPRIEQTPSHEL
178	250	34	15.25850987	16.19761846	80	1.061546547	1.810948798	0.118684512	14.42267827	23.85752203	25.80176139	80	1.081493768	2.884724621	0.120914679	22.5506532	Pos1to6	SPRIERTPSHEL
179	250	35	20.10422913	20.92039852	90	1.040596901	2.20520363	0.109688544	17.8919748	30.95213025	32.71266882	90	1.056879399	3.44821806	0.11140487	27.546181	Pos1to6	SPRIEYTPSHEL
180	250	36	1.152697493	9.568693165	62	8.301131239	1.215225247	1.054244722	0.162513917	1.65738276	13.7620137	62	8.303461358	1.747777488	1.054540647	0.233667347	Pos1to6	SPRIEATPSHEL
181	250	37	184.4690623	88.10330604	87	0.477604781	9.445665877	0.051204607	182.479554	262.0312955	132.984913	87	0.507515382	14.25747922	0.05441136	259.2052745	Pos1to6	SPRIEITPSHEL
182	250	38	76.68447994	45.08144154	68	0.58788221	5.4669278	0.07129119	72.01953826	110.8371706	68.85455145	68	0.621222565	8.349840837	0.075334302	104.0946207	Pos1to6	SPRIEISPSHEL
183	250	39	-2.037169425	9.76200118	72	-4.791943695	1.150462872	-0.56473598	-2.143167591	-3.097684658	14.85548522	72	-4.795673823	1.750735723	-0.56517558	-3.258863639	Pos1to6	SPRIEIEPSHEL
184	250	40	71.67909616	60.6700075	80	0.846411447	6.783113049	0.094631677	68.23087072	100.22819	86.39398095	80	0.861972873	9.659140713	0.096371497	95.40656961	Pos1to6	SPRIEIFPSHEL
185	250	41	188.5934816	131.4507335	58	0.69700571	17.26032691	0.091521333	148.1412598	268.0192463	193.5379874	58	0.722104812	25.41278275	0.094817007	210.5306529	Pos1to6	SPRIEIHPSHEL
186	250	42	21.33648664	13.64250581	66	0.63939795	1.679276381	0.078704447	20.15912379	30.26649191	20.04011244	66	0.662122076	2.46676732	0.081501593	28.59636488	Pos1to6	SPRIEIKPSHEL
187	250	43	13.85020651	22.79129011	66	1.645555977	2.805413881	0.202553939	8.391946208	19.41623935	32.19696919	66	1.658249499	3.963172943	0.204116403	11.76444814	Pos1to6	SPRIEILPSHEL
188	250	44	89.76965153	40.33386632	54	0.449304031	5.48874399	0.061142534	90.01188083	114.2760045	53.194406	54	0.465490601	7.238841771	0.063345247	114.5843604	Pos1to6	SPRIEIYPSHEL
189	250	45	6.352102606	32.36042001	71	5.094442269	3.840475292	0.604599064	6.162647937	9.712180885	49.5184468	71	5.098591901	5.87675844	0.605091535	9.422510184	Pos1to6	SPRIEINPSHEL
190	250	46	3.100246638	10.1122464	80	3.261755461	1.130583518	0.364675347	1.623578483	4.516162099	14.75579086	80	3.267329768	1.649747572	0.365298573	2.365083965	Pos1to6	SPRIEIAPSHEL
191	250	47	0.420015461	16.09366473	81	38.31683886	1.78818497	4.25742654	-2.003416349	0.614455164	23.5443255	81	38.31740197	2.616036167	4.257489108	-2.930867161	Pos1to6	Scrambled
192	250	48	-1.753054957	10.38295664	64	-5.922778745	1.29786958	-0.740347343	-1.416088415	-2.544435322	15.07761482	64	-5.925721394	1.884701853	-0.740715174	-2.055352211	Pos1to6	SPRIEIPPSHEL
193	500	1	1.489463579	12.53867304	86	8.418247496	1.352079886	0.907762973	0.163182272	1.783863234	15.01774345	86	8.418663028	1.619404924	0.907807781	0.195436034	Pos1to6	SFRIEITPSHEL
194	500	2	20.47921135	13.53759906	78	0.661041035	1.532831252	0.074848158	21.35023833	29.68282653	20.38064385	78	0.686613986	2.307653498	0.077743725	30.94530399	Pos1to6	SHRIEITPSHEL
195	500	3	14.03512609	18.34682685	87	1.307207839	1.966986304	0.140147391	10.84117591	17.98443057	23.56096385	87	1.31007561	2.526000468	0.140454848	13.89174377	Pos1to6	SLRIEITPSHEL
196	500	4	56.97869249	397.817277	48	6.981860404	57.41997799	1.007744746	-2.148804696	65.86859779	459.9366843	48	6.982639675	66.38614212	1.007857224	-2.484064587	Pos1to6	SYRIEITPSHEL
197	500	5	61.15128798	31.05247582	84	0.507797576	3.38810288	0.055405258	60.17239345	86.84560646	46.8146552	84	0.539056115	5.107897645	0.058815844	85.4554037	Pos1to6	SKRIEITPSHEL
198	500	6	-0.284158171	11.73730869	110	-41.30554696	1.119108473	-3.938329375	-1.753098177	-0.357275401	14.75749341	110	-41.30565205	1.407071788	-3.938339395	-2.204190897	Pos1to6	SARIEITPSHEL
199	500	7	-7.277791534	14.10210115	89	-1.937689625	1.494819732	-0.205394689	-9.786494905	-9.831042289	19.09284744	89	-1.942097987	2.023837781	-0.205861975	-13.21986826	Pos1to6	SPEIEITPSHEL
200	500	8	-2.840367756	12.22388378	81	-4.303627146	1.358209309	-0.478180794	-3.208286378	-4.14938223	17.87483272	81	-4.307829873	1.986092525	-0.478647764	-4.686860164	Pos1to6	SPGIEITPSHEL
201	500	9	101.5067896	160.9984985	86	1.586086005	17.36091457	0.171032052	37.63947379	140.2743548	223.7859846	86	1.595344958	24.13146332	0.172030471	52.01477576	Pos1to6	SPLIEITPSHEL
202	500	10	32.32629284	596.2604582	98	18.44506146	60.23140191	1.863232577	20.17137514	42.70342614	787.6884896	98	18.4455572	79.56855321	1.863282654	26.64663197	Pos1to6	SPVIEITPSHEL
203	500	11	126.0902437	161.5902814	117	1.281544683	14.9390268	0.118478848	73.77842962	181.9290908	235.3347841	117	1.293552246	21.75670849	0.119588947	106.45108	Pos1to6	SPYIEITPSHEL
204	500	12	36.75776295	27.28087337	112	0.742179915	2.577800231	0.07012941	36.53001641	52.36994589	39.80756775	112	0.760122377	3.761461592	0.071824813	52.0454682	Pos1to6	SPKIEITPSHEL
205	500	13	12.42403722	47.29951376	113	3.807096913	4.449563966	0.358141551	2.673954633	18.12936154	69.08070214	113	3.810432154	6.498565811	0.358455304	3.901879028	Pos1to6	SPSIEITPSHEL
206	500	14	2.906047869	14.14940749	100	4.868951968	1.414940749	0.486895197	0.369679147	4.627379944	22.54847509	100	4.872838487	2.254847509	0.487283849	0.588650272	Pos1to6	SPAIEITPSHEL
207	500	15	210.2775921	256.8301418	78	1.221386165	29.08028713	0.13829475	180.2090671	293.1960775	362.4332263	78	1.236146231	41.03748185	0.139965999	251.2706707	Pos1to6	SPRFEITPSHEL
208	500	16	12.01500599	24.35639075	76	2.027164262	2.793869629	0.232531688	9.397429508	16.24490186	33.15601176	76	2.041010284	3.803255385	0.234119936	12.70580474	Pos1to6	SPRHEITPSHEL
209	500	17	41.48612562	23.69151551	97	0.571070814	2.405508942	0.057983456	39.4051824	56.48263611	33.6473083	97	0.595710658	3.416366545	0.060485253	53.64946823	Pos1to6	SPRLEITPSHEL
210	500	18	14.74109902	14.4451745	73	0.979925207	1.690679795	0.11469157	13.33876082	18.78015752	18.650866	73	0.993115525	2.182918752	0.11623538	16.9935789	Pos1to6	SPRYEITPSHEL
211	500	19	-35.40553778	387.6585021	108	-10.94909233	37.30245676	-1.053576901	-0.508721454	-51.93238455	568.688344	108	-10.95055328	54.72206141	-1.053717481	-0.746186044	Pos1to6	SPRAEITPSHEL
212	500	20	12.94112201	14.99405703	72	1.158636555	1.767066567	0.136546627	10.87549525	19.14493007	22.49943696	72	1.175216461	2.651584074	0.138500588	16.08906831	Pos1to6	SPRKEITPSHEL
213	500	21	109.0512662	73.80498678	94	0.676791654	7.612403145	0.069805729	87.24807151	166.7325948	117.5844478	94	0.70522772	12.12790976	0.072738685	133.396868	Pos1to6	SPRIDITPSHEL
214	500	22	12762.92601	8754.415044	135	0.685925393	753.4600816	0.059035058	9815.711525	17918.65342	12643.38379	135	0.705598992	1088.169219	0.060728292	13780.87852	Pos1to6	SPRIRITPSHEL
215	500	23	10113.0791	9295.51423	80	0.919157671	1039.270085	0.102764952	6419.326499	14609.32986	13708.77626	80	0.938357638	1532.68778	0.104911573	9273.3437	Pos1to6	SPRIHITPSHEL
216	500	24	2892.24615	2205.507223	74	0.762558617	256.3850069	0.088645639	2228.603038	4181.391147	3272.696806	74	0.782681335	380.4432761	0.090984857	3221.946034	Pos1to6	SPRINITPSHEL
217	500	25	2212.327154	938.9423738	75	0.42441389	108.4197265	0.049007095	2238.196783	3008.764208	1344.430082	75	0.446837967	155.241414	0.051596404	3043.946895	Pos1to6	SPRIFITPSHEL
218	500	26	4455.047367	2715.833	99	0.609608109	272.9514865	0.06126792	3874.505814	6745.584843	4259.964912	99	0.631518988	428.1425828	0.063470046	5866.561125	Pos1to6	SPRIVITPSHEL
219	500	27	7232.295316	6100.337909	80	0.843485732	682.0385125	0.094304572	5310.338967	10132.49921	8697.487718	80	0.858375366	972.4086885	0.095969283	7439.824151	Pos1to6	SPRILITPSHEL
220	500	28	840.420653	601.7788332	81	0.716044794	66.8643148	0.079560533	646.8621115	1627.473338	1211.676946	81	0.744514161	134.6307718	0.082723796	1252.647512	Pos1to6	SPRIAITPSHEL
221	500	29	140.4200778	105.842493	110	0.75375612	10.09168574	0.071867826	113.4137656	199.1232813	154.1310277	110	0.774048251	14.69581687	0.073802605	160.8268669	Pos1to6	SPRIGITPSHEL
222	500	30	-2.811938535	11.65213696	103	-4.143809266	1.14811917	-0.408301659	-2.052319611	-4.075982783	16.9038116	103	-4.147174435	1.665582048	-0.408633239	-2.974894114	Pos1to6	SPRIEETPSHEL
223	500	31	141.4382547	112.5670832	80	0.795874379	12.5853825	0.088981461	118.2535185	195.8553767	160.3505473	80	0.818719149	17.9277362	0.091535584	163.7505176	Pos1to6	SPRIEFTPSHEL
224	500	32	7.540242665	11.26356435	88	1.49379335	1.200699994	0.159238906	5.682989343	11.20910358	16.94486939	88	1.511706022	1.806329146	0.161148403	8.448165269	Pos1to6	SPRIEHTPSHEL
225	500	33	1.832287617	20.63630046	79	11.26258796	2.321765197	1.267140145	0.41057933	2.792417988	31.45492788	79	11.26440527	3.538955878	1.267344607	0.625725511	Pos1to6	SPRIEQTPSHEL
226	500	34	43.27176996	26.81219661	87	0.619623293	2.874569207	0.06643059	39.09498994	67.65779974	44.19461778	87	0.653208026	4.738160369	0.070031251	61.12717374	Pos1to6	SPRIERTPSHEL
227	500	35	46.54895712	37.202775	91	0.799218227	3.899910492	0.083780835	39.40904953	71.66598502	58.78803734	91	0.820305998	6.162660813	0.085991434	60.67350437	Pos1to6	SPRIEYTPSHEL
228	500	36	7.765949592	32.94694078	76	4.242487076	3.779273299	0.486646643	3.146956467	11.16611344	47.42298106	76	4.247044533	5.439789001	0.487169419	4.524787664	Pos1to6	SPRIEATPSHEL
229	500	37	409.7205662	244.6549668	74	0.5971264	28.4405622	0.069414534	356.0919567	581.9925001	361.5974596	74	0.621309483	42.03485085	0.07222576	505.8150975	Pos1to6	SPRIEITPSHEL
230	500	38	198.8241428	127.5483226	79	0.641513253	14.35030746	0.07217588	173.4331875	287.3737353	193.1722821	79	0.672198807	21.73357974	0.075628275	250.6745016	Pos1to6	SPRIEISPSHEL
231	500	39	6.740948492	10.07330241	54	1.494344961	1.370802829	0.203354592	5.603136883	10.2501699	15.43945738	54	1.506263557	2.101044027	0.204976507	8.520033212	Pos1to6	SPRIEIEPSHEL
232	500	40	160.8955674	96.61739371	59	0.600497548	12.57851327	0.078178122	161.7561393	224.9787228	139.9906853	59	0.622239666	18.22523487	0.081008704	226.1820522	Pos1to6	SPRIEIFPSHEL
233	500	41	398.8672897	257.8436722	47	0.646439753	37.61036506	0.094292929	328.442029	566.8494449	381.7312286	47	0.673426131	55.68122241	0.098229297	466.7647276	Pos1to6	SPRIEIHPSHEL
234	500	42	54.19719238	36.14498741	76	0.666916234	4.146114406	0.076500539	46.82714399	76.88045893	52.95011033	76	0.688733016	6.07379421	0.079003095	66.42580847	Pos1to6	SPRIEIKPSHEL
235	500	43	27.85253473	23.19103943	78	0.832636586	2.625868135	0.094277528	20.11474281	39.04573411	33.47976724	78	0.857450065	3.790837155	0.097087102	28.19832763	Pos1to6	SPRIEILPSHEL
236	500	44	227.2262876	81.91034537	63	0.360479178	10.31973351	0.045416108	228.2473219	289.2571356	110.0518392	63	0.380463697	13.86522847	0.04793392	290.5569036	Pos1to6	SPRIEIYPSHEL
237	500	45	16.52501421	12.17783217	69	0.736933235	1.466038715	0.088716336	17.0426103	25.26626805	19.33105525	69	0.765093412	2.327185577	0.092106423	26.05765749	Pos1to6	SPRIEINPSHEL
238	500	46	13.02167544	14.41420068	55	1.106939022	1.943610423	0.149259627	11.34833708	18.96881248	21.30687534	55	1.123258262	2.873018485	0.151460113	16.53124276	Pos1to6	SPRIEIAPSHEL
239	500	47	4.040941913	24.08271928	86	5.959679648	2.596906406	0.642648784	2.058440884	5.911633873	35.25284045	86	5.963299016	3.80141155	0.64303907	3.011364458	Pos1to6	Scrambled
240	500	48	6.642202218	14.64551144	64	2.204918031	1.83068893	0.275614754	3.598431064	9.640686887	21.3330114	64	2.212810317	2.666626425	0.27660129	5.222868265	Pos1to6	SPRIEIPPSHEL
241	63	1	-7.106647632	6.517656728	75	-0.917121133	0.752594173	-0.105900027	-7.206264184	-8.511310788	7.838300126	75	-0.920927495	0.905088938	-0.106339547	-8.630617031	Pos1to6	SFRIEITPSHEL
242	63	2	-4.816579393	7.91785337	96	-1.643874776	0.808112526	-0.167777267	-5.101821109	-6.981210759	11.54918429	96	-1.654323969	1.178733686	-0.168843733	-7.394643689	Pos1to6	SHRIEITPSHEL
243	63	3	-5.188680771	7.509156443	89	-1.447218816	0.795968991	-0.153404888	-5.886873759	-6.648708994	9.639362574	89	-1.449809667	1.021770389	-0.153679517	-7.543364534	Pos1to6	SLRIEITPSHEL
244	63	4	-6.579708299	8.927534364	46	-1.356828291	1.31629313	-0.200053417	-7.975385369	-7.606284745	10.35087963	46	-1.360832519	1.526153941	-0.200643809	-9.219717549	Pos1to6	SYRIEITPSHEL
245	63	5	14.67263465	11.70537839	91	0.797769363	1.227057068	0.083628953	13.61398819	20.83772716	17.04570753	91	0.818021437	1.786875673	0.085751947	19.33426261	Pos1to6	SKRIEITPSHEL
246	63	6	-5.922913194	7.304114113	134	-1.233196212	0.630979356	-0.106531927	-6.74592873	-7.446948219	9.209724534	134	-1.236711236	0.795599023	-0.106835579	-8.481735304	Pos1to6	SARIEITPSHEL
247	63	7	-8.052047647	7.499210888	105	-0.93134209	0.731848045	-0.090889681	-8.981087642	-10.87692888	10.22952811	105	-0.940479451	0.998299723	-0.091781397	-12.13190183	Pos1to6	SPEIEITPSHEL
248	63	8	-9.541120332	5.369669847	92	-0.562792383	0.559826781	-0.058675162	-10.13379286	-13.93824975	8.280386381	92	-0.594076482	0.863289957	-0.061936755	-14.80406188	Pos1to6	SPGIEITPSHEL
249	63	9	12.00801839	27.16910795	94	2.262580476	2.802279519	0.233367357	2.620435862	16.59413166	37.65342353	94	2.269080679	3.883654102	0.234037802	3.621235103	Pos1to6	SPLIEITPSHEL
250	63	10	4.569134349	24.6615971	110	5.397433129	2.351391023	0.514625057	-2.389896904	6.035882065	32.58849398	110	5.399127026	3.107190985	0.514786563	-3.157082886	Pos1to6	SPVIEITPSHEL
251	63	11	21.56819335	48.5666355	94	2.251771148	5.009265971	0.23225246	4.945125888	31.1196306	70.28762424	94	2.258626561	7.249614899	0.232959542	7.135066364	Pos1to6	SPYIEITPSHEL
252	63	12	-5.377501681	6.031130585	126	-1.121548805	0.537295817	-0.099915509	-5.884128252	-7.661496497	8.684321401	126	-1.133501974	0.773660841	-0.100980382	-8.383303375	Pos1to6	SPKIEITPSHEL
253	63	13	-5.916477043	7.168401694	132	-1.21159968	0.623929282	-0.105456216	-7.604587409	-8.633421603	10.5503806	132	-1.222039312	0.918292762	-0.106364869	-11.0967403	Pos1to6	SPSIEITPSHEL
254	63	14	-6.22452092	8.144315197	95	-1.308424424	0.835589108	-0.134241513	-7.269891852	-9.911475849	13.1110362	95	-1.322813716	1.345163931	-0.135717824	-11.57604874	Pos1to6	SPAIEITPSHEL
255	63	15	0.10212164	7.896663908	102	77.32605862	0.781886237	7.656420695	-0.523718243	0.142391131	11.01057836	102	77.32629316	1.090209711	7.656443918	-0.730235367	Pos1to6	SPRFEITPSHEL
256	63	16	-5.961813296	4.560269301	74	-0.764913135	0.530120538	-0.088919346	-5.846617814	-8.060676121	6.455691492	74	-0.800887096	0.750458892	-0.093101234	-7.904925946	Pos1to6	SPRHEITPSHEL
257	63	17	-6.263302797	6.553755513	99	-1.046373731	0.658677212	-0.105164517	-5.810336042	-8.527377465	9.039210357	99	-1.06002231	0.908474823	-0.106536251	-7.910671132	Pos1to6	SPRLEITPSHEL
258	63	18	-4.909005822	5.40671942	113	-1.101387861	0.508621379	-0.103609854	-5.539311301	-6.254072542	6.961657173	113	-1.113139818	0.654897618	-0.104715386	-7.05708161	Pos1to6	SPRYEITPSHEL
259	63	19	-10.5305677	23.55686498	115	-2.236998578	2.196688986	-0.208601193	-8.303429749	-15.44610041	34.66318629	115	-2.244138351	3.232358789	-0.20926698	-12.17936328	Pos1to6	SPRAEITPSHEL
260	63	20	-5.965956939	5.016326373	98	-0.840825106	0.506725485	-0.084936162	-6.396756932	-8.825960243	7.621470515	98	-0.863528761	0.769884783	-0.087229578	-9.463280232	Pos1to6	SPRKEITPSHEL
261	63	21	27.28014623	242.1621766	113	8.87686505	22.78070131	0.83506522	-6.330666019	41.70964471	370.3432032	113	8.879078348	34.83895797	0.835273429	-9.6791941	Pos1to6	SPRIDITPSHEL
262	63	22	4118.527382	3254.910058	126	0.790309194	289.9704348	0.070406339	3134.486529	5782.252809	4668.84212	126	0.807443444	415.9335145	0.071932779	4400.697593	Pos1to6	SPRIRITPSHEL
263	63	23	1243.783284	1329.761949	97	1.069126725	135.0168695	0.108553372	697.8021762	1796.766356	1950.709262	97	1.085677754	198.0645168	0.110233874	1008.043354	Pos1to6	SPRIHITPSHEL
264	63	24	77.73568504	70.62967748	74	0.908587574	8.210533233	0.10562116	49.95118318	112.3843851	104.0163359	74	0.925540819	12.09165344	0.107591935	72.21564981	Pos1to6	SPRINITPSHEL
265	63	25	337.4941892	195.1703147	101	0.57829237	19.42017215	0.057542242	316.5076107	458.9919872	273.074807	101	0.594944606	27.17195887	0.059199201	430.4502473	Pos1to6	SPRIFITPSHEL
266	63	26	702.5858133	374.1198085	98	0.532489842	37.79180765	0.053789597	676.2791814	1063.816346	593.0140356	98	0.557440236	59.9034637	0.056309967	1023.984308	Pos1to6	SPRIVITPSHEL
267	63	27	970.6799308	1080.942335	100	1.113592958	108.0942335	0.111359296	679.8498751	1359.929759	1529.80273	100	1.124913048	152.980273	0.112491305	952.4747011	Pos1to6	SPRILITPSHEL
268	63	28	27.02804773	35.37128625	95	1.308688167	3.629017398	0.134268573	16.89452496	52.33977401	69.32295696	95	1.324479486	7.112385315	0.135888728	32.71622232	Pos1to6	SPRIAITPSHEL
269	63	29	-1.706004557	6.22389693	121	-3.648229955	0.565808812	-0.331657269	-2.181856263	-2.419206932	8.836096343	121	-3.652476449	0.803281486	-0.332043314	-3.093990442	Pos1to6	SPRIGITPSHEL
270	63	30	-8.59239347	5.755515804	117	-0.669838483	0.532097624	-0.06192659	-9.340197557	-12.4549123	8.598257992	117	-0.690350746	0.794909233	-0.063822949	-13.53887504	Pos1to6	SPRIEETPSHEL
271	63	31	-2.224689113	5.884899958	81	-2.645268466	0.653877773	-0.293918718	-1.900784721	-3.080618643	8.170512845	81	-2.652231188	0.907834761	-0.294692354	-2.632094892	Pos1to6	SPRIEFTPSHEL
272	63	32	-6.027056514	5.30631301	87	-0.88041534	0.568896469	-0.094390432	-5.880486704	-8.959645433	8.157547788	87	-0.910476631	0.874580924	-0.097613341	-8.741759052	Pos1to6	SPRIEHTPSHEL
273	63	33	-7.936248093	5.20484291	88	-0.655831679	0.554838119	-0.069911892	-8.019156274	-12.09489259	8.301128421	88	-0.686333372	0.884903263	-0.073163383	-12.22124519	Pos1to6	SPRIEQTPSHEL
274	63	34	-1.150009769	22.54864804	94	-19.60735347	2.325715467	-2.022344096	-3.428819686	-1.798103723	35.25801533	94	-19.60844354	3.636586611	-2.022456527	-5.361148755	Pos1to6	SPRIERTPSHEL
275	63	35	-4.125823893	7.482052282	104	-1.813468649	0.733675588	-0.177825231	-3.938505174	-6.352048501	11.57889882	104	-1.82286058	1.135404443	-0.178746186	-6.063655777	Pos1to6	SPRIEYTPSHEL
276	63	36	-7.356029465	5.086440936	86	-0.691465547	0.548485032	-0.074562647	-7.709424739	-10.57671809	7.603588393	86	-0.718898654	0.819916023	-0.077520835	-11.08484033	Pos1to6	SPRIEATPSHEL
277	63	37	7.77795752	9.876053212	84	1.269748927	1.077565748	0.138540966	4.647827467	11.04829319	14.15617023	84	1.281299291	1.544564801	0.139801214	6.602062358	Pos1to6	SPRIEITPSHEL
278	63	38	-1.935336097	6.29114364	89	-3.250672403	0.666859892	-0.344570586	-1.689274203	-2.797269764	9.110335756	89	-3.256867061	0.965693659	-0.345227218	-2.441620171	Pos1to6	SPRIEISPSHEL
279	63	39	-6.971548255	6.023882371	75	-0.864066654	0.695578022	-0.099773823	-7.955181623	-10.60081592	9.376625269	75	-0.884519205	1.082719425	-0.10213548	-12.09651184	Pos1to6	SPRIEIEPSHEL
280	63	40	0.125849195	14.90183222	89	118.4102311	1.579591056	12.5514594	1.040325591	0.175973717	20.83710828	89	118.4103434	2.20872906	12.5514713	1.454677258	Pos1to6	SPRIEIFPSHEL
281	63	41	7.941609798	8.531359025	51	1.074260665	1.194629213	0.150426581	6.007349684	11.28620276	12.31000563	51	1.090712784	1.723745572	0.152730339	8.537332896	Pos1to6	SPRIEIHPSHEL
282	63	42	-5.291013969	5.802428886	69	-1.096657261	0.698530351	-0.13202202	-5.843721395	-7.505473334	8.331525216	69	-1.110059932	1.002997771	-0.133635512	-8.289506578	Pos1to6	SPRIEIKPSHEL
283	63	43	-4.443535722	6.96810333	63	-1.568143876	0.877898501	-0.197567558	-4.914245612	-6.229275576	9.851343088	63	-1.581458866	1.241152566	-0.199245089	-6.88915136	Pos1to6	SPRIEILPSHEL
284	63	44	1.877828395	8.911213873	63	4.745488937	1.122707418	0.597875408	1.151456448	2.390459609	11.3476285	63	4.747048835	1.429666809	0.598071937	1.465794286	Pos1to6	SPRIEIYPSHEL
285	63	45	-5.627292071	6.400071602	69	-1.13732707	0.77047808	-0.13691809	-6.097248755	-8.603966573	9.944228438	69	-1.155772556	1.197144424	-0.139138665	-9.32251673	Pos1to6	SPRIEINPSHEL
286	63	46	-6.470649612	6.94844854	73	-1.073840952	0.813254388	-0.125683577	-6.89754085	-9.425863793	10.2803706	73	-1.090655544	1.203226369	-0.127651576	-10.04772078	Pos1to6	SPRIEIAPSHEL
287	63	47	-7.091098379	9.249128741	92	-1.304329491	0.96428833	-0.13598575	-9.089762669	-10.3738134	13.70140452	92	-1.32076836	1.428470167	-0.13769962	-13.29772861	Pos1to6	Scrambled
288	63	48	-7.705712368	6.98438816	67	-0.906390977	0.853278821	-0.110733282	-8.091888803	-11.18429668	10.35022258	67	-0.925424538	1.264480942	-0.113058602	-11.74480447	Pos1to6	SPRIEIPPSHEL
