# Supplementary material for: Quantitative mapping of protein-peptide affinity landscapes using spectrally encoded beads
Source: eLife journal article supplement (doi:10.7554/elife.40499), 2019-07-08
Supplement: supp [file elife-40499-supp-v1.zip › elife_poa_e40499_Figure_3_source_data_6.csv]

	conc	code	AVG	SD	N	CV	SEM	RSEM	MED	AVG_NORM	SD_NORM	N_NORM	CV_NORM	SEM_NORM	RSEM_NORM	MED_NORM	library	sequence
1	1000	1	5314.998241	2097.30981	83	0.394602164	230.2096592	0.043313215	4881.258372	7117.200898	2996.615677	83	0.421038512	328.9213022	0.046214981	6536.38908	Flank	SPRIEITPSHEL
2	1000	2	-31.45937297	41.12510285	97	-1.307244835	4.175621547	-0.132730603	-31.54232042	-47.58744143	63.02345073	97	-1.32437149	6.399061901	-0.134469551	-47.71291299	Flank	Scrambled
3	1000	3	7905.336018	2011.201313	56	0.254410604	268.7580803	0.033997047	7894.412753	10668.63373	3254.338377	56	0.30503797	434.8792581	0.040762413	10653.89226	Flank	FPRIEITPSHEL
4	1000	4	9178.933623	4473.579264	45	0.487374618	666.8818225	0.072653518	7667.874384	12130.28579	6315.48402	45	0.520637694	941.456772	0.077612085	10133.3675	Flank	HPRIEITPSHEL
5	1000	5	11473.47808	3345.94278	57	0.291624105	443.1809477	0.038626556	10900.48748	14907.85715	4889.23811	57	0.327963842	647.5954079	0.043439872	14163.35213	Flank	LPRIEITPSHEL
6	1000	6	9611.925101	2035.993633	56	0.211819548	272.0710934	0.028305578	9765.105456	12221.9811	3054.91779	56	0.24995275	408.2305612	0.033401341	12416.75659	Flank	YPRIEITPSHEL
7	1000	7	6478.259151	3235.467392	89	0.499434696	342.9588576	0.052939972	5570.761635	8562.626402	4541.757917	89	0.530416452	481.4253763	0.056224031	7363.143329	Flank	APRIEITPSHEL
8	1000	8	3365.849199	2261.073002	88	0.671768956	241.0311918	0.071610811	2548.807807	4840.419725	3342.001998	88	0.690436406	356.25861	0.073600768	3665.434442	Flank	QPRIEITPSHEL
9	1000	9	9320.544998	5022.306103	70	0.538842536	600.2803939	0.064404001	8063.119267	13653.97822	7878.070815	70	0.576979887	941.6095625	0.068962287	11811.9332	Flank	KPRIEITPSHEL
10	1000	10	5.426861109	52.68856286	75	9.708846755	6.083951191	1.121081058	2.074737132	7.185040514	69.76567572	75	9.709851403	8.055846331	1.121197064	2.746904711	Flank	DPRIEITPSHEL
11	1000	11	3910.751792	2207.39652	68	0.564443012	267.6861473	0.068448769	3366.375819	5301.681104	3091.014352	68	0.583025326	374.8405489	0.070702206	4563.688011	Flank	GPRIEITPSHEL
12	1000	12	1390.20491	630.9833555	84	0.453877951	68.84592831	0.049522144	1234.306895	1853.277381	897.5677175	84	0.48431375	97.93266683	0.052842962	1645.450273	Flank	SPRIEITGSHEL
13	1000	13	102.1955779	59.22505339	83	0.579526576	6.500794159	0.063611306	96.20434291	116.5648194	68.06751411	83	0.583945606	7.471380315	0.064096357	109.7311849	Flank	SPRIEITFSHEL
14	1000	14	3635.481678	1116.154898	69	0.30701706	134.3692596	0.036960511	3329.566361	4755.872069	1603.451396	69	0.337151919	193.0328642	0.040588321	4355.679126	Flank	SPRIEITHSHEL
15	1000	15	2546.684529	1037.700166	49	0.407471029	148.2428808	0.058210147	2370.702339	3062.496242	1309.75973	49	0.427677171	187.1085328	0.061096739	2850.870189	Flank	SPRIEITKSHEL
16	1000	16	1192.268309	306.3773607	64	0.256970145	38.29717008	0.032121268	1152.240848	1557.122027	471.3881947	64	0.302730413	58.92352434	0.037841302	1504.845505	Flank	SPRIEITQSHEL
17	1000	17	120.3040758	68.92606396	78	0.572932077	7.804339927	0.064871783	107.9748255	142.2533278	82.430811	78	0.579464904	9.33345142	0.06561148	127.674629	Flank	SPRIEITYSHEL
18	1000	18	695.4096507	217.0859954	50	0.312169949	30.70059589	0.044147498	654.2720849	863.4352277	305.2842614	50	0.353569384	43.17371428	0.050002262	812.3579619	Flank	SPRIEITNSHEL
19	1000	19	433.5747329	162.6126964	70	0.375051137	19.4359347	0.044827185	462.3486087	526.2746517	207.5944955	70	0.394460373	24.81228802	0.047147032	561.200491	Flank	SPRIEITASHEL
20	1000	20	1489.060106	624.919899	65	0.419674059	77.51177382	0.052054161	1331.532083	1972.633216	891.7869258	65	0.452079443	110.6125547	0.056073554	1763.947879	Flank	SPRIEITGSHEL
21	1000	21	488.8810656	223.9062835	63	0.457997454	28.20954015	0.057702255	459.324498	747.899495	370.651279	63	0.49558969	46.69767177	0.062438432	702.6832992	Flank	SPRIEITPEHEL
22	1000	22	13157.7058	7808.335128	58	0.593441991	1025.284632	0.077922751	10360.67012	16052.57063	9793.358602	58	0.610080393	1285.930984	0.08010748	12640.15106	Flank	SPRIEITPFHEL
23	1000	23	4975.74177	4373.544545	20	0.878973377	977.9542905	0.196544422	2580.2418	7498.684383	6706.059223	20	0.894298104	1499.520428	0.199971135	3888.549644	Flank	SPRIEITPHHEL
24	1000	24	2049.10509	1015.869964	62	0.495762745	129.0156144	0.062961932	1741.613261	2851.637631	1507.001171	62	0.528468679	191.3893401	0.067115589	2423.716547	Flank	SPRIEITPLHEL
25	1000	25	942.9407848	516.5739699	114	0.547832884	48.38158508	0.051309251	795.4100103	1356.790781	785.4832112	114	0.578927291	73.56724309	0.054221509	1144.5098	Flank	SPRIEITPQHEL
26	1000	26	1515.803371	885.6554058	86	0.584281196	95.50267852	0.063004662	1278.272783	1897.578538	1135.983781	86	0.598649151	122.4962814	0.064553998	1600.222724	Flank	SPRIEITPKHEL
27	1000	27	7575.710813	5133.471008	57	0.677622356	679.9448454	0.089753274	6434.731057	10535.88576	7387.999122	57	0.701222402	978.564389	0.092879176	8949.073289	Flank	SPRIEITPRHEL
28	1000	28	11854.21579	4813.015878	72	0.406017232	567.2193609	0.04784959	11587.06033	16807.23017	7512.444816	72	0.44697697	885.3501121	0.052676741	16428.44987	Flank	SPRIEITPPHEL
29	1000	29	6225.017344	3051.899357	34	0.490263591	523.3964217	0.084079512	4893.487617	10276.61416	5499.740444	34	0.535170471	943.1977048	0.091780979	8078.448842	Flank	SPRIEITPVHEL
30	1000	30	3266.22485	3539.82074	42	1.083765173	546.2061985	0.167228597	1808.190024	5569.54418	6175.313259	42	1.10876457	952.8715229	0.171086087	3083.313209	Flank	SPRIEITPAHEL
31	1000	31	1334.247145	850.4007026	73	0.637363704	99.53187381	0.074597779	1074.038473	1896.767604	1267.914209	73	0.668460494	148.3981336	0.078237383	1526.854592	Flank	SPRIEITPGHEL
32	1000	32	3036.495779	1590.664979	91	0.523848902	166.7469978	0.054914286	2477.228697	4768.473965	2655.121252	91	0.556807329	278.3323348	0.058369268	3890.208124	Flank	SPRIEITPTHEL
33	1000	33	833.6906118	329.5663571	95	0.395310146	33.81279479	0.040557965	783.1335242	1089.320379	464.7476506	95	0.426640004	47.68210287	0.043772341	1023.261262	Flank	SPRIEITPDHEL
34	1000	34	2190.361356	728.0144988	68	0.332371869	88.28472575	0.04030601	2047.410521	2972.587812	1079.692457	68	0.363216337	130.9319424	0.044046451	2778.586073	Flank	SPRIEITPSDEL
35	1000	35	973.9015516	493.2949489	93	0.506514183	51.15230332	0.052523074	896.8582602	1434.651603	769.5290878	93	0.536387431	79.79644917	0.055620786	1321.15935	Flank	SPRIEITPSEEL
36	1000	36	3177.88452	1122.128874	71	0.353105617	133.1721966	0.041905927	2937.546864	4266.090083	1675.803553	71	0.392819542	198.881292	0.046619103	3943.453408	Flank	SPRIEITPSFEL
37	1000	37	5578.591441	2514.384675	71	0.450720348	298.4025614	0.053490664	4701.06548	8456.068148	4197.706731	71	0.496413541	498.1761355	0.058913449	7125.908123	Flank	SPRIEITPSYEL
38	1000	38	1592.980345	513.1708145	56	0.322145101	68.5753346	0.04304845	1534.257258	2340.208453	921.966553	56	0.393967705	123.202963	0.052646149	2253.939802	Flank	SPRIEITPSVEL
39	1000	39	4311.320131	2011.464358	63	0.466554164	253.4206887	0.0587803	3848.894108	6103.286679	3037.108609	63	0.49761854	382.6397183	0.062694043	5448.65689	Flank	SPRIEITPSQEL
40	1000	40	6766.626038	4368.953891	78	0.645662087	494.6866154	0.073106835	5413.289446	8992.238361	5990.530446	78	0.666189018	678.2940047	0.075431053	7193.77556	Flank	SPRIEITPSPEL
41	1000	41	2446.96798	1119.227168	54	0.457393467	152.307526	0.062243367	2274.572644	4141.83129	2166.396039	54	0.5230527	294.8091598	0.071178457	3850.028372	Flank	SPRIEITPSAEL
42	1000	42	2841.237644	1324.289312	68	0.466095933	160.593668	0.056522434	2517.485972	3619.214846	1792.881922	68	0.495378694	217.4188688	0.060073491	3206.814685	Flank	SPRIEITPSGEL
43	1000	43	921.1962284	322.4134678	68	0.349994342	39.09837597	0.042443048	928.2087146	1300.032016	531.1624434	68	0.408576433	64.4129076	0.04954717	1309.928341	Flank	SPRIEITPSTEL
44	1000	44	1573.172315	642.0163767	73	0.408103022	75.14233325	0.047764846	1529.300859	2202.967146	970.4469028	73	0.440518101	113.5822188	0.051558744	2141.532441	Flank	SPRIEITPSSEL
45	1000	45	6379.626953	1753.862724	50	0.274916188	248.033645	0.03887902	5880.447025	8284.128323	2628.024318	50	0.317236071	371.6587632	0.044863955	7635.928889	Flank	SPRIEITPStEL
46	1000	46	4700.137604	1018.408687	76	0.216676356	116.8194882	0.024854483	4688.118607	7107.037183	1931.750841	76	0.27180818	221.5870184	0.031178537	7088.863361	Flank	SPRIEITPSsEL
47	1000	47	135.2419704	94.30301695	56	0.697291061	12.60177071	0.093179437	115.5915725	181.8559475	129.5371747	56	0.712306507	17.31013309	0.095185961	155.4326285	Flank	SPRIEIGPSHEL
48	1000	48	9.565323939	46.46557686	60	4.857710743	5.998680178	0.62712776	4.164810983	13.08426232	63.59981601	60	4.860787293	8.210700941	0.627524941	5.696982115	Flank	SPRIEGTPSHEL
49	125	1	348.8661854	178.8643064	108	0.512701758	17.21122591	0.04933475	309.8280616	467.1592755	249.1433834	108	0.533315716	23.97383325	0.051318329	414.8841558	Flank	SPRIEITPSHEL
50	125	2	-20.98667104	10.4051621	99	-0.495798599	1.045758139	-0.049829634	-20.56085912	-31.74576873	17.12174523	99	-0.539339443	1.720800142	-0.054205654	-31.10165864	Flank	Scrambled
51	125	3	1227.083191	464.4146214	114	0.378470364	43.49641451	0.035446997	1171.186111	1656.008182	685.9217547	114	0.414201912	64.24245833	0.038793563	1580.572366	Flank	FPRIEITPSHEL
52	125	4	1061.701671	559.6696349	55	0.527143971	75.46583818	0.071080079	910.4438549	1403.076351	782.974883	55	0.558041537	105.5763117	0.075246305	1203.183791	Flank	HPRIEITPSHEL
53	125	5	2490.529779	1007.78607	61	0.404647268	129.033784	0.051809774	2334.815833	3236.025024	1396.580352	61	0.431572791	178.8137909	0.055257234	3033.700912	Flank	LPRIEITPSHEL
54	125	6	2959.004482	706.6127244	75	0.238800829	81.59260932	0.027574345	2990.673469	3762.502982	1027.891386	75	0.273193507	118.6906737	0.031545669	3802.771478	Flank	YPRIEITPSHEL
55	125	7	560.6892524	284.7040172	113	0.507775057	26.78270103	0.047767459	496.6173826	741.0899261	398.9116462	113	0.538276978	37.52645102	0.050636839	656.4030571	Flank	APRIEITPSHEL
56	125	8	175.6270269	137.6463416	85	0.783742366	14.92984195	0.085008795	144.8758175	252.5688095	202.004685	85	0.799800598	21.9104844	0.086750555	208.3455684	Flank	QPRIEITPSHEL
57	125	9	1809.836806	985.966884	85	0.544782204	106.9431238	0.059089926	1439.375528	2651.290492	1544.458437	85	0.582530825	167.5200379	0.063184339	2108.58937	Flank	KPRIEITPSHEL
58	125	10	-18.45060883	55.57124418	132	-3.011892166	4.836855963	-0.262151564	-24.12419447	-24.42818589	73.65413364	132	-3.01512908	6.410769468	-0.262433301	-31.93988406	Flank	DPRIEITPSHEL
59	125	11	206.7208163	126.5562377	103	0.612208484	12.46995663	0.060322694	178.5367499	280.2447979	176.3810633	103	0.629382114	17.37934258	0.062014862	242.0365606	Flank	GPRIEITPSHEL
60	125	12	71.11032831	53.60198475	109	0.753786208	5.134138994	0.072199624	63.42123719	94.79693391	73.23014133	109	0.77249483	7.014175423	0.073991585	84.546633	Flank	SPRIEITGSHEL
61	125	13	-1.671019115	15.52468313	105	-9.290547901	1.51505394	-0.906664637	-3.312258982	-1.905973285	17.70806348	105	-9.290824598	1.728130044	-0.90669164	-3.777980201	Flank	SPRIEITFSHEL
62	125	14	296.8988797	120.8279957	101	0.406966829	12.02283493	0.040494713	272.2034568	388.397801	167.0715348	101	0.430155718	16.62423906	0.042802094	356.0916907	Flank	SPRIEITHSHEL
63	125	15	175.1550928	85.93000175	75	0.490593795	9.922341928	0.056648892	154.8240578	210.6314337	106.8956903	75	0.507501128	12.34325111	0.058601183	186.1825011	Flank	SPRIEITKSHEL
64	125	16	74.52761437	52.03375219	109	0.698180837	4.983929556	0.066873596	70.56880407	97.33429055	69.71938633	109	0.716288021	6.677906082	0.068607949	92.16401916	Flank	SPRIEITQSHEL
65	125	17	5.069800871	66.54111795	119	13.12499635	6.099814281	1.203166443	-4.292557835	5.994776492	78.68313886	119	13.12528315	7.212871513	1.203192733	-5.075726927	Flank	SPRIEITYSHEL
66	125	18	49.66751967	72.75399878	60	1.464820455	9.392500855	0.189107508	40.31943356	61.66823557	90.91119906	60	1.474198154	11.73658533	0.190318163	50.06145552	Flank	SPRIEITNSHEL
67	125	19	9.269425924	25.14049399	97	2.712195361	2.552630416	0.275381716	11.74544188	11.25126427	30.54659051	97	2.714947385	3.101536353	0.275661142	14.2566618	Flank	SPRIEITASHEL
68	125	20	72.11384988	43.92429575	101	0.60909653	4.370630783	0.06060737	63.80706784	95.53286333	60.36347294	101	0.631860816	6.006390051	0.062872501	84.52844914	Flank	SPRIEITGSHEL
69	125	21	-0.907036441	18.36724078	106	-20.24972752	1.78398413	-1.966827406	-2.637133508	-1.387601492	28.09978031	106	-20.25061264	2.729291935	-1.966913376	-4.034336688	Flank	SPRIEITPEHEL
70	125	22	1106.986861	665.5426688	59	0.601220025	86.64627526	0.07827218	925.8897176	1350.538236	834.1585045	59	0.617648936	108.5981873	0.080411042	1129.597387	Flank	SPRIEITPFHEL
71	125	23	268.0115899	262.5316512	27	0.979553352	50.52423983	0.18851513	132.2050563	403.906476	401.2114401	27	0.993327575	77.21317765	0.191165981	199.2394374	Flank	SPRIEITPHHEL
72	125	24	105.7823884	53.49432053	101	0.505701576	5.322883839	0.050319188	96.90878304	147.2120884	79.17116599	101	0.53780343	7.877825456	0.053513441	134.8631331	Flank	SPRIEITPLHEL
73	125	25	30.58546594	23.8943881	140	0.781233418	2.019444377	0.066026275	29.10581986	44.00920917	35.35453441	140	0.803344006	2.988003518	0.06789496	41.88015696	Flank	SPRIEITPQHEL
74	125	26	102.7949673	56.23568292	119	0.547066499	5.155116601	0.050149504	97.16088274	128.6852421	72.37078229	119	0.562386029	6.634218735	0.051553843	121.6321387	Flank	SPRIEITPKHEL
75	125	27	751.1934041	499.7009502	135	0.665209449	43.00741018	0.057252114	650.9410441	1044.71885	720.0564371	135	0.689234656	61.97259087	0.059319874	905.2933307	Flank	SPRIEITPRHEL
76	125	28	2535.742069	1128.738815	110	0.445131557	107.6210233	0.042441629	2195.106243	3595.244203	1735.726867	110	0.482784136	165.4950633	0.046031661	3112.281446	Flank	SPRIEITPPHEL
77	125	29	447.3535911	245.0688738	46	0.547819172	36.13343415	0.08077153	378.9399623	738.516858	434.5058708	46	0.588349292	64.06439555	0.086747371	625.5757324	Flank	SPRIEITPVHEL
78	125	30	301.8820258	293.1999177	88	0.971240063	31.25521624	0.103534539	192.530043	514.7671569	514.282837	88	0.999059148	54.82273463	0.106500063	328.300907	Flank	SPRIEITPAHEL
79	125	31	42.20610799	32.47119166	106	0.769348163	3.153880939	0.074725699	34.91895792	60.00026204	47.71826296	106	0.795300909	4.634807419	0.077246453	49.64083933	Flank	SPRIEITPGHEL
80	125	32	177.2044481	103.8647719	114	0.586129598	9.727827171	0.054896067	154.4367467	278.279589	171.3544018	114	0.615763457	16.04881015	0.057671532	242.5254831	Flank	SPRIEITPTHEL
81	125	33	9.971545275	57.58947514	115	5.775381203	5.370246248	0.538557074	15.93120258	13.02906296	75.27684708	115	5.7776102	7.019602185	0.538764929	20.81609578	Flank	SPRIEITPDHEL
82	125	34	130.3052059	81.71241577	87	0.627084814	8.76049052	0.067230549	118.9854074	176.8400751	113.878749	87	0.643964604	12.20908343	0.069040252	161.4777264	Flank	SPRIEITPSDEL
83	125	35	38.03930604	29.32273917	89	0.770853683	3.108204136	0.081710327	33.3387192	56.03559344	44.31314639	89	0.790803553	4.697184123	0.083825009	49.11117235	Flank	SPRIEITPSEEL
84	125	36	253.0849451	86.64330143	99	0.342348698	8.707979438	0.034407339	235.4948638	339.7490272	130.1847373	99	0.383179132	13.08405839	0.038510952	316.1355602	Flank	SPRIEITPSFEL
85	125	37	556.4401166	223.0653065	92	0.400879268	23.25616584	0.041794553	523.7108001	843.455843	380.9412629	92	0.451643398	39.71587211	0.047087079	793.8445148	Flank	SPRIEITPSYEL
86	125	38	68.58762988	30.14907366	90	0.439570134	3.177991404	0.046334761	66.88323928	100.7604091	49.83872921	90	0.49462611	5.253463333	0.05213817	98.25653052	Flank	SPRIEITPSVEL
87	125	39	280.5705481	198.1986757	83	0.706412975	21.75513097	0.077538898	251.3353405	397.1875056	288.8759545	83	0.72730373	31.70825537	0.079831956	355.8009122	Flank	SPRIEITPSQEL
88	125	40	591.0629996	354.6172007	79	0.599965149	39.8975522	0.067501353	409.2238611	785.4696489	488.5636734	79	0.622001976	54.96770778	0.06998069	543.821763	Flank	SPRIEITPSPEL
89	125	41	153.9567284	64.53611942	72	0.419183495	7.605654612	0.049401249	139.7478728	260.5930279	127.6879632	72	0.489989944	15.04817077	0.057745869	236.5425772	Flank	SPRIEITPSAEL
90	125	42	201.8120388	132.044261	97	0.654293281	13.40706341	0.066433417	170.4811473	257.0714662	173.6430372	97	0.675466008	17.63077919	0.068583182	217.1616656	Flank	SPRIEITPSGEL
91	125	43	48.11890217	90.5727175	85	1.882268992	9.823990537	0.204160737	33.12975666	67.90747886	128.6192608	85	1.894036753	13.95071756	0.20543713	46.75414752	Flank	SPRIEITPSTEL
92	125	44	74.85336211	65.91384017	78	0.880572874	7.463272745	0.099705244	64.27530463	104.8197301	93.92436857	78	0.896056196	10.63484055	0.101458385	90.00691343	Flank	SPRIEITPSSEL
93	125	45	1734.449635	565.0980596	67	0.325808284	69.03771595	0.039803817	1691.914215	2252.232529	815.8270567	67	0.362230385	99.66913821	0.044253485	2196.999068	Flank	SPRIEITPStEL
94	125	46	1093.293615	200.89945	93	0.183756172	20.83230252	0.019054627	1097.63617	1653.159764	407.2862787	93	0.246368371	42.23361969	0.02554721	1659.726105	Flank	SPRIEITPSsEL
95	125	47	-6.394366015	57.67322072	94	-9.01938059	5.948538519	-0.930278077	-9.452112023	-8.598318165	77.56159212	94	-9.020553861	7.999867401	-0.930399091	-12.70998037	Flank	SPRIEIGPSHEL
96	125	48	-11.46756605	50.64510398	81	-4.416377787	5.627233776	-0.490708643	-18.12421749	-15.68631061	69.32975256	81	-4.419761554	7.70330584	-0.491084617	-24.79184369	Flank	SPRIEGTPSHEL
97	2000	1	9438.294565	4340.238035	83	0.459854056	476.4030161	0.05047554	8525.891066	12638.61915	6101.041412	83	0.482730062	669.6762957	0.052986508	11416.83907	Flank	SPRIEITPSHEL
98	2000	2	90.36530729	172.1395393	64	1.904929496	21.51744241	0.238116187	62.08755596	136.6922911	262.0012622	64	1.916723029	32.75015777	0.239590379	93.91757221	Flank	Scrambled
99	2000	3	10054.69944	2663.00405	56	0.264851681	355.8588848	0.035392295	9468.130219	13569.30374	4258.034123	56	0.313799013	569.0037439	0.041933157	12777.70018	Flank	FPRIEITPSHEL
100	2000	4	13530.32495	7425.0414	39	0.548770368	1188.958171	0.087873586	11013.40127	17880.8035	10344.29607	39	0.578514051	1656.413032	0.092636387	14554.59974	Flank	HPRIEITPSHEL
101	2000	5	17247.02342	7076.62545	64	0.410309958	884.5781813	0.051288745	16186.94264	22409.60933	9790.458621	64	0.436886626	1223.807328	0.054610828	21032.21246	Flank	LPRIEITPSHEL
102	2000	6	11661.98552	2098.944	62	0.179981702	266.5661546	0.022857699	11668.19319	14828.72215	3315.878319	62	0.223611872	421.1169677	0.028398736	14836.61547	Flank	YPRIEITPSHEL
103	2000	7	10984.62341	5091.442387	66	0.463506321	626.7132347	0.057053684	9490.541182	14518.90457	7212.034127	66	0.49673404	887.7400337	0.061143734	12544.1043	Flank	APRIEITPSHEL
104	2000	8	6156.033177	3423.461675	79	0.556114884	385.169531	0.062567813	5161.53874	8852.976664	5121.67972	79	0.578526287	576.2339885	0.065089293	7422.796581	Flank	QPRIEITPSHEL
105	2000	9	14069.26801	8815.479241	72	0.626576964	1038.914192	0.073842803	11270.03364	20610.54145	13595.97927	72	0.659661431	1602.301524	0.077741845	16509.84935	Flank	KPRIEITPSHEL
106	2000	10	148.2805034	372.9188062	99	2.514955086	37.47975023	0.252762497	174.4694749	196.3200095	494.4968648	99	2.518830689	49.69880486	0.253152009	230.9936114	Flank	DPRIEITPSHEL
107	2000	11	7458.055581	3666.066815	87	0.491557991	393.0436186	0.052700548	6894.498938	10110.64738	5184.622018	87	0.512788333	555.8498253	0.05497668	9346.651663	Flank	GPRIEITPSHEL
108	2000	12	2986.905476	1095.759993	74	0.366854593	127.3795118	0.04264598	2849.644471	3981.833409	1608.270877	74	0.4039021	186.9576919	0.046952665	3798.851236	Flank	SPRIEITGSHEL
109	2000	13	234.2521699	996.7041606	75	4.25483427	115.0894831	0.491305942	323.4090731	267.1892701	1137.007484	75	4.255438413	131.2903154	0.491375703	368.8821078	Flank	SPRIEITFSHEL
110	2000	14	6872.99882	1886.444292	68	0.27447179	228.7649727	0.033284594	7124.108306	8991.134055	2767.556722	68	0.307809527	335.6155497	0.037327388	9319.63099	Flank	SPRIEITHSHEL
111	2000	15	4609.234814	2134.525001	65	0.463097474	264.755242	0.057440172	4117.977382	5542.800507	2665.933743	65	0.480972342	330.6683842	0.059657277	4952.042593	Flank	SPRIEITKSHEL
112	2000	16	2709.00569	767.1803298	92	0.283196278	79.98407847	0.029525253	2630.394252	3538.006002	1150.870334	92	0.325287841	119.9865267	0.033913602	3435.338171	Flank	SPRIEITQSHEL
113	2000	17	339.4395343	624.1958452	83	1.83890143	68.51439504	0.201845655	339.6247962	401.3696381	738.9003428	83	1.840947278	81.10484934	0.202070216	401.5887006	Flank	SPRIEITYSHEL
114	2000	18	1521.414113	524.3908604	37	0.344673325	86.2093264	0.056663946	1464.503515	1889.019716	722.6850569	37	0.382571474	118.8086915	0.062894363	1818.358322	Flank	SPRIEITNSHEL
115	2000	19	949.4288292	2046.565664	75	2.155575648	236.3170474	0.248904436	1095.942275	1152.420306	2488.118411	75	2.159037286	287.3031668	0.249304152	1330.258881	Flank	SPRIEITASHEL
116	2000	20	4172.622898	1958.740323	71	0.469426634	232.4597088	0.055710692	3649.450123	5527.684539	2756.152912	71	0.498608937	327.0951723	0.059173994	4834.611111	Flank	SPRIEITGSHEL
117	2000	21	1677.558488	791.1771722	59	0.471624195	103.0024944	0.06140024	1426.034284	2566.360685	1304.248776	59	0.508209459	169.7987277	0.066163236	2181.574202	Flank	SPRIEITPEHEL
118	2000	22	16554.75252	12001.97068	41	0.724986415	1874.392912	0.113223856	11314.54468	20197.0114	14918.88024	41	0.738667714	2329.937651	0.115360516	13803.89032	Flank	SPRIEITPFHEL
119	2000	23	9347.592903	8500.831423	14	0.909413954	2271.942763	0.243051103	5068.958578	14087.27626	13019.94086	14	0.924234083	3479.725565	0.247011949	7639.166637	Flank	SPRIEITPHHEL
120	2000	24	4180.054847	1935.978873	78	0.463146763	219.2064416	0.052441044	3737.85875	5817.174414	2896.949175	78	0.497999367	328.014902	0.056387325	5201.792101	Flank	SPRIEITPLHEL
121	2000	25	2351.224162	1424.743275	89	0.605958078	151.0224851	0.064231428	2213.324414	3383.159705	2145.630536	89	0.63420906	227.436382	0.067226026	3184.73674	Flank	SPRIEITPQHEL
122	2000	26	3224.46166	1528.5689	90	0.474053985	161.1253095	0.049969678	2841.00098	4036.585061	1984.602436	90	0.491653813	209.195465	0.051824862	3556.544727	Flank	SPRIEITPKHEL
123	2000	27	13881.68611	8154.674986	70	0.587441246	974.6700844	0.070212658	11575.24996	19305.89255	11863.75008	70	0.614514457	1417.989351	0.073448526	16098.22684	Flank	SPRIEITPRHEL
124	2000	28	15455.83747	6825.413417	67	0.441607479	833.8569646	0.05395094	13787.41262	21913.70753	10508.43015	67	0.479536844	1283.809072	0.05858475	19548.16931	Flank	SPRIEITPPHEL
125	2000	29	9663.348257	5596.556049	37	0.579152888	920.0681469	0.095212148	7529.343602	15952.80721	9852.936129	37	0.617630239	1619.812722	0.101537786	12429.87044	Flank	SPRIEITPVHEL
126	2000	30	7063.482137	6168.214713	56	0.873254097	824.2623623	0.116693487	5236.031197	12044.60123	10889.44289	56	0.904093269	1455.163016	0.120814545	8928.444435	Flank	SPRIEITPAHEL
127	2000	31	3575.782203	2021.450668	60	0.565317056	260.968159	0.072982118	2816.489696	5083.336972	3050.808268	60	0.600158574	393.8576538	0.077480139	4003.925684	Flank	SPRIEITPGHEL
128	2000	32	5411.336976	2135.109084	91	0.394562211	223.8202478	0.041361358	5156.202122	8497.894073	3716.758433	91	0.43737406	389.6221507	0.04584926	8097.233577	Flank	SPRIEITPTHEL
129	2000	33	1997.05404	817.0569524	80	0.409131118	91.34974435	0.04574225	2007.463246	2609.399256	1146.770423	80	0.439476795	128.212831	0.049134999	2623.000178	Flank	SPRIEITPDHEL
130	2000	34	4396.880677	1607.152188	89	0.365520992	170.3577912	0.038745148	4236.4649	5967.103954	2349.710704	89	0.393777404	249.0688364	0.041740321	5749.400158	Flank	SPRIEITPSDEL
131	2000	35	2400.415683	915.7745122	68	0.381506636	111.0539719	0.046264475	2217.310656	3536.04551	1486.410585	68	0.420359574	180.2537601	0.050976086	3266.314016	Flank	SPRIEITPSEEL
132	2000	36	5744.983592	2180.178164	78	0.379492496	246.8565665	0.042969064	5353.526578	7712.242963	3213.684986	78	0.416699137	363.8781705	0.047181886	7186.739007	Flank	SPRIEITPSFEL
133	2000	37	9981.26583	5036.492005	61	0.504594516	644.8567221	0.064606708	8233.662239	15129.67296	8257.713926	61	0.54579593	1057.291927	0.069882008	12480.64314	Flank	SPRIEITPSYEL
134	2000	38	3209.215694	1025.542902	62	0.319561849	130.2440788	0.040584395	3159.020947	4714.580263	1847.447012	62	0.391858216	234.6260052	0.049766043	4640.840387	Flank	SPRIEITPSVEL
135	2000	39	8061.480361	6562.157292	64	0.814013928	820.2696615	0.101751741	6133.534191	11412.17172	9497.300219	64	0.832207966	1187.162527	0.104025996	8682.889783	Flank	SPRIEITPSQEL
136	2000	40	13041.98271	9016.404606	63	0.691336955	1135.960205	0.087100269	10149.01324	17331.62385	12314.90922	63	0.710545609	1551.532724	0.089520332	13487.12721	Flank	SPRIEITPSPEL
137	2000	41	4712.088994	1609.352866	48	0.341537027	232.2900776	0.049296624	4356.766567	7975.861472	3393.472564	48	0.425467841	489.8055745	0.061410993	7374.429186	Flank	SPRIEITPSAEL
138	2000	42	5835.824508	3129.371055	60	0.536234606	404.000066	0.06922759	5025.273605	7433.768428	4176.839824	60	0.561873815	539.2277026	0.072537598	6401.275469	Flank	SPRIEITPSGEL
139	2000	43	2295.981881	837.3113614	68	0.364685527	101.5389172	0.044224616	2172.254517	3240.189074	1364.862852	68	0.421229385	165.5139325	0.051081566	3065.579659	Flank	SPRIEITPSTEL
140	2000	44	3511.131432	1170.813068	66	0.333457488	144.1171261	0.041045779	3330.475121	4916.757761	1831.134306	66	0.372427196	225.397052	0.045842619	4663.778533	Flank	SPRIEITPSSEL
141	2000	45	9188.544569	2751.274225	59	0.299424376	358.1853952	0.038981733	9237.066258	11931.5883	4041.177542	59	0.338695691	526.1165033	0.044094423	11994.5951	Flank	SPRIEITPStEL
142	2000	46	7034.309334	2227.421999	67	0.31665113	272.1229079	0.038685093	7211.021731	10636.51795	3793.510534	67	0.356649662	463.4510741	0.043571691	10903.72323	Flank	SPRIEITPSsEL
143	2000	47	455.4554272	180.7686048	52	0.396896368	25.06809514	0.055039623	440.5495375	612.4376778	258.889847	52	0.422720313	35.90156223	0.05862076	592.3941611	Flank	SPRIEIGPSHEL
144	2000	48	113.4464151	161.3225837	57	1.422015703	21.36769821	0.188350581	114.0078734	155.1816398	222.2961744	57	1.432490175	29.44384759	0.189737959	155.9496502	Flank	SPRIEGTPSHEL
145	250	1	1083.058085	461.8475028	88	0.426429117	49.23310922	0.045457497	1008.358239	1450.300005	654.0906924	88	0.451003717	69.72630209	0.048077158	1350.271032	Flank	SPRIEITPSHEL
146	250	2	-21.71443125	21.16651407	98	-0.974767141	2.138140805	-0.098466351	-20.71507483	-32.84662496	32.76838577	98	-0.997618045	3.310106827	-0.100774641	-31.3349351	Flank	Scrambled
147	250	3	2469.843658	742.0072935	69	0.300426827	89.32718102	0.03616714	2411.23978	3333.173607	1147.791706	69	0.344354013	138.1778837	0.041455352	3254.084835	Flank	FPRIEITPSHEL
148	250	4	2329.758601	1087.623967	44	0.466839769	163.9654824	0.070378743	1834.665194	3078.858484	1543.945339	44	0.501466809	232.7585175	0.075598966	2424.575016	Flank	HPRIEITPSHEL
149	250	5	4848.382908	1582.392411	59	0.326375297	206.0099448	0.042490444	4495.408409	6299.65903	2262.9415	59	0.359216505	294.6098895	0.046766006	5841.027971	Flank	LPRIEITPSHEL
150	250	6	4862.86798	1262.04336	68	0.259526552	153.0452376	0.031472217	4620.706624	6183.348281	1802.346722	68	0.29148394	218.5666444	0.03534762	5875.429577	Flank	YPRIEITPSHEL
151	250	7	1569.816264	781.6503025	92	0.497924706	81.49267742	0.051912239	1344.691482	2074.901587	1097.612369	92	0.528994905	114.434	0.055151531	1777.343345	Flank	APRIEITPSHEL
152	250	8	528.4125813	276.0121329	109	0.522342091	26.43716759	0.050031299	464.0358991	759.9088758	415.0175113	109	0.546141155	39.75146811	0.052310835	667.3289224	Flank	QPRIEITPSHEL
153	250	9	2732.237272	1794.996038	82	0.656969311	198.2241518	0.072550124	2300.676578	4002.545797	2756.133353	82	0.688595082	304.3640122	0.076042606	3370.338097	Flank	KPRIEITPSHEL
154	250	10	-10.30800087	30.30479427	109	-2.939929348	2.902672852	-0.281594161	-12.09924669	-13.64755839	40.16811354	109	-2.943245406	3.847407497	-0.281911781	-16.01912706	Flank	DPRIEITPSHEL
155	250	11	691.9130098	386.5605953	87	0.558683808	41.44364597	0.059897191	579.3255047	938.0043338	541.6519929	87	0.577451482	58.07118911	0.061909297	785.3730546	Flank	GPRIEITPSHEL
156	250	12	211.3447759	82.35837288	86	0.38968729	8.880931744	0.042021061	199.7472595	281.7429933	119.6697511	86	0.424747923	12.90432113	0.045801746	266.2823841	Flank	SPRIEITGSHEL
157	250	13	22.45110853	29.30868733	107	1.305444998	2.833377749	0.126202131	22.59075013	25.60785372	33.48003408	107	1.307412735	3.23663706	0.12639236	25.76712967	Flank	SPRIEITFSHEL
158	250	14	773.4410711	245.7000195	70	0.317671286	29.36676927	0.037968981	757.7450517	1011.801767	350.975624	70	0.346881806	41.9496107	0.041460306	991.2685157	Flank	SPRIEITHSHEL
159	250	15	458.6209939	189.5621655	88	0.413330763	20.20739473	0.044061207	406.736294	551.5112117	238.9497942	88	0.433263711	25.47213364	0.046186067	489.1176578	Flank	SPRIEITKSHEL
160	250	16	230.0898632	73.18877819	112	0.318087799	6.915689495	0.030056472	224.8519178	300.5011469	107.0019965	112	0.356078496	10.1107383	0.033646255	293.660304	Flank	SPRIEITQSHEL
161	250	17	25.73768679	30.02800392	98	1.166693968	3.033286457	0.117853888	20.66187924	30.43347927	35.60461145	98	1.169915905	3.596608886	0.118179353	24.4316002	Flank	SPRIEITYSHEL
162	250	18	126.8954939	55.52009361	49	0.437526124	7.931441944	0.062503732	124.4575266	157.5561104	73.73059366	49	0.467964038	10.53294195	0.066852005	154.5290789	Flank	SPRIEITNSHEL
163	250	19	73.47523107	62.09557651	94	0.845122575	6.404669691	0.087167738	63.25281086	89.18451355	76.15583571	94	0.853913226	7.854874698	0.088074424	76.77650122	Flank	SPRIEITASHEL
164	250	20	237.5610594	104.9113792	78	0.441618586	11.87887453	0.050003458	212.2445482	314.7091475	148.7068101	78	0.47252141	16.83773059	0.053502514	281.1710851	Flank	SPRIEITGSHEL
165	250	21	58.16364939	42.91798468	90	0.737883285	4.523952806	0.077779728	54.53222918	88.97985026	67.78368043	90	0.761786857	7.145027278	0.080299385	83.42443498	Flank	SPRIEITPEHEL
166	250	22	3167.557471	2095.685166	57	0.661609201	277.5802812	0.087632279	2669.949734	3864.460933	2614.591067	57	0.676573295	346.3110469	0.089614322	3257.373081	Flank	SPRIEITPFHEL
167	250	23	827.7278845	733.2144647	22	0.885815832	156.3218491	0.18885657	490.6428363	1247.426102	1123.961092	22	0.901024189	239.62931	0.192099003	739.4225713	Flank	SPRIEITPHHEL
168	250	24	317.4665853	158.7819401	70	0.500153236	18.97807174	0.059779746	280.0500839	441.8024559	235.2994028	70	0.532589622	28.12365779	0.063656635	389.7317719	Flank	SPRIEITPLHEL
169	250	25	140.1365748	69.16315967	127	0.493541103	6.137237994	0.043794691	129.8493372	201.6415197	106.4351652	127	0.527843499	9.444593668	0.046838536	186.8392867	Flank	SPRIEITPQHEL
170	250	26	329.0936781	144.1250491	108	0.437945359	13.86843932	0.042141312	303.6977015	411.9802822	188.249488	108	0.456938101	18.11431543	0.043968889	380.1879923	Flank	SPRIEITPKHEL
171	250	27	2060.535734	1494.897426	107	0.725489688	144.5171889	0.070135735	1606.323808	2865.680808	2142.326101	107	0.747580154	207.1064813	0.072271301	2233.987615	Flank	SPRIEITPRHEL
172	250	28	5041.828748	2320.008126	97	0.460152108	235.5611354	0.046721368	4433.976478	7148.442185	3550.397299	97	0.496667275	360.4882283	0.050428921	6286.612673	Flank	SPRIEITPPHEL
173	250	29	1606.122102	927.845445	43	0.577692968	141.4951038	0.088097352	1320.60693	2651.478098	1634.003814	43	0.616261479	249.1832455	0.093978994	2180.133345	Flank	SPRIEITPVHEL
174	250	30	828.2067346	965.1017786	57	1.165290909	127.8308534	0.154346551	470.9373525	1412.252435	1678.570489	57	1.188576806	222.3320926	0.157430844	803.0391389	Flank	SPRIEITPAHEL
175	250	31	199.0826214	124.5528124	70	0.625633777	14.88690847	0.074777539	163.8186002	283.0161325	186.0224722	70	0.657285754	22.23393808	0.078560674	232.8847507	Flank	SPRIEITPGHEL
176	250	32	503.7084171	284.8982047	95	0.565601437	29.22993906	0.058029483	407.2284617	791.0172276	471.6490985	95	0.596256418	48.39017649	0.061174618	639.5063451	Flank	SPRIEITPTHEL
177	250	33	104.3833107	54.79803411	100	0.524969305	5.479803411	0.052496931	94.78164051	136.3897661	74.87094481	100	0.548948407	7.487094481	0.054894841	123.8439909	Flank	SPRIEITPDHEL
178	250	34	385.1314037	175.526387	90	0.45575714	18.50210574	0.048041021	346.7044557	522.6703408	250.2109877	90	0.478716637	26.37455389	0.050461164	470.5202803	Flank	SPRIEITPSDEL
179	250	35	152.9955417	83.40089636	82	0.545119782	9.210088261	0.060198409	129.6952698	225.377297	129.1375401	82	0.5729838	14.26085562	0.063275475	191.0537327	Flank	SPRIEITPSEEL
180	250	36	688.1019322	258.1589133	79	0.375175394	29.04514699	0.04221053	650.6314611	923.7292325	381.2889676	79	0.412771356	42.89836042	0.046440406	873.4277178	Flank	SPRIEITPSFEL
181	250	37	1395.080567	646.1405486	87	0.46315644	69.27353815	0.049655582	1267.2303	2114.672937	1073.686444	87	0.50773168	115.1112695	0.05443455	1920.876602	Flank	SPRIEITPSYEL
182	250	38	251.9750337	80.88279369	75	0.320995269	9.339540541	0.037065341	248.0718257	370.1703574	145.4873341	75	0.393028051	16.7994303	0.04538297	364.43625	Flank	SPRIEITPSVEL
183	250	39	784.7010585	351.2253191	86	0.447591239	37.87360018	0.048265005	718.2223852	1110.855926	533.0827817	86	0.479884717	57.4837947	0.0517473	1016.745911	Flank	SPRIEITPSQEL
184	250	40	1684.064233	1056.658128	80	0.627445264	118.1379701	0.070150513	1315.920746	2237.970136	1451.433348	80	0.648549025	162.2751816	0.072509985	1748.740502	Flank	SPRIEITPSPEL
185	250	41	378.0415651	217.7536427	61	0.5760045	27.880497	0.073749819	372.1413264	639.8875652	402.7514185	61	0.629409666	51.56703502	0.08058765	629.9005963	Flank	SPRIEITPSAEL
186	250	42	517.3308779	199.0699935	73	0.384802072	23.29938041	0.045037676	482.089858	658.9845089	276.6379493	73	0.419794313	32.37802294	0.049133208	614.093923	Flank	SPRIEITPSGEL
187	250	43	131.966863	120.5316794	83	0.913348068	13.23007059	0.100252975	123.6649093	186.2373528	174.5714039	83	0.937359779	19.16170096	0.102888602	174.5212762	Flank	SPRIEITPSTEL
188	250	44	230.9769543	115.2642172	85	0.499029081	12.5021597	0.054127303	224.7463265	323.4449507	170.0896538	85	0.525868941	18.44881323	0.057038495	314.7199888	Flank	SPRIEITPSSEL
189	250	45	2749.909935	714.1847441	74	0.259712049	83.02229013	0.030190912	2604.844231	3570.836813	1086.087275	74	0.304154833	126.2550811	0.035357281	3382.464842	Flank	SPRIEITPStEL
190	250	46	1882.84215	439.5936998	100	0.233473475	43.95936998	0.023347348	1964.871804	2847.029235	812.4810264	100	0.285378533	81.24810264	0.028537853	2971.065562	Flank	SPRIEITPSsEL
191	250	47	7.708682992	74.06227243	76	9.607642772	8.495525291	1.102072209	11.54105152	10.36564201	99.6008027	76	9.608744214	11.42499562	1.102198553	15.51891661	Flank	SPRIEIGPSHEL
192	250	48	1.411359454	118.3665734	86	83.86706382	12.76379586	9.043618072	-12.03769407	1.930577306	161.9121943	86	83.86724208	17.45944092	9.043637294	-16.46618013	Flank	SPRIEGTPSHEL
193	500	1	2696.762356	1155.141613	80	0.428343866	129.1487585	0.0478903	2521.349095	3611.177011	1635.193538	80	0.452814562	182.8201954	0.050626207	3376.28485	Flank	SPRIEITPSHEL
194	500	2	-124.4296625	995.3344584	95	-7.999173499	102.1191607	-0.820697884	8.049222065	-188.2201937	1506.136149	95	-8.001990218	154.5263084	-0.820986874	12.17576345	Flank	Scrambled
195	500	3	4589.405942	1512.988584	66	0.32966981	186.2360206	0.040579548	4569.278577	6193.62554	2292.525051	66	0.370142663	282.1903267	0.045561412	6166.462685	Flank	FPRIEITPSHEL
196	500	4	5063.496858	2464.170408	44	0.486653883	371.4876664	0.073365833	4167.166591	6691.590387	3479.379869	44	0.519963068	524.5362512	0.078387382	5507.058201	Flank	HPRIEITPSHEL
197	500	5	9080.007976	3593.026754	84	0.395707445	392.0313589	0.043175222	8328.07783	11797.94487	4992.915425	84	0.423202132	544.7717351	0.046175138	10820.93797	Flank	LPRIEITPSHEL
198	500	6	7468.122722	1768.140301	67	0.236758335	216.0127181	0.028924634	7245.325542	9496.043073	2577.320655	67	0.271409958	314.8698323	0.033158004	9212.746763	Flank	YPRIEITPSHEL
199	500	7	3887.611741	1992.300349	95	0.512474105	204.4057029	0.052578734	3319.219369	5138.443238	2788.694762	95	0.542711991	286.1140457	0.055681075	4387.171729	Flank	APRIEITPSHEL
200	500	8	1517.971325	885.1300456	81	0.583100636	98.34778284	0.06478896	1339.000669	2182.990951	1319.645119	81	0.604512409	146.6272355	0.067168045	1925.613676	Flank	QPRIEITPSHEL
201	500	9	5603.131287	3117.389969	100	0.556365684	311.7389969	0.055636568	5343.517666	8208.214496	4870.57276	100	0.593377861	487.057276	0.059337786	7827.897817	Flank	KPRIEITPSHEL
202	500	10	30.97675228	129.6356244	112	4.184932727	12.24941511	0.395438973	23.32399033	41.01251454	171.730182	112	4.187262934	16.22697693	0.395659157	30.88043201	Flank	DPRIEITPSHEL
203	500	11	1798.11682	925.8754077	89	0.514913935	98.14259693	0.054580768	1700.617931	2437.649452	1304.675391	89	0.535218626	138.2953148	0.056733061	2305.473328	Flank	GPRIEITPSHEL
204	500	12	659.5940667	288.8978877	94	0.43799346	29.79754194	0.045175576	630.4922441	879.30258	412.7975708	94	0.469460207	42.57681849	0.048421123	840.5070404	Flank	SPRIEITGSHEL
205	500	13	74.08220331	271.2487465	96	3.661456252	27.68420926	0.373695814	83.93482292	84.49855486	309.4470827	96	3.662158285	31.58281063	0.373767465	95.73650515	Flank	SPRIEITFSHEL
206	500	14	1813.950339	560.7633561	77	0.30913931	63.90491532	0.035229694	1784.353751	2372.977371	804.6424908	77	0.339085615	91.69752209	0.038642392	2334.259643	Flank	SPRIEITHSHEL
207	500	15	1150.601109	512.1334697	62	0.445100796	65.0410157	0.056527858	993.2482018	1383.646672	641.5554123	62	0.463669971	81.47761884	0.058886145	1194.423122	Flank	SPRIEITKSHEL
208	500	16	607.2265462	214.2136053	111	0.352773782	20.33225563	0.033483806	614.6237303	793.0478599	307.2089601	111	0.387377579	29.15898409	0.036768253	802.7087041	Flank	SPRIEITQSHEL
209	500	17	100.2161417	241.92732	92	2.414055419	25.22266669	0.251682676	72.15933996	118.5003881	286.2512204	92	2.415614202	29.84375275	0.25184519	85.32467564	Flank	SPRIEITYSHEL
210	500	18	389.3293752	218.9156551	66	0.562289077	26.94665439	0.069213001	382.1329851	483.3995292	283.4099495	66	0.586285117	34.88535324	0.072166709	474.4643401	Flank	SPRIEITNSHEL
211	500	19	25.16000828	2066.383655	85	82.129689	224.1307762	8.908215517	239.759842	30.53931327	2508.187078	85	82.12977992	272.0510856	8.90822538	291.0214036	Flank	SPRIEITASHEL
212	500	20	704.5855162	356.6022416	96	0.506116339	36.39556388	0.051655282	662.0220087	933.4000603	497.7773209	96	0.533294717	50.80418508	0.054429164	877.0140297	Flank	SPRIEITGSHEL
213	500	21	261.7211808	212.5870201	85	0.812265249	23.0582998	0.088102536	234.3637095	400.3860095	333.9378479	85	0.834039752	36.22064512	0.090464313	358.5340327	Flank	SPRIEITPEHEL
214	500	22	6449.594199	3542.84024	69	0.549312116	426.5078446	0.066129408	5814.488445	7868.588035	4463.428321	69	0.567246411	537.3336261	0.068288443	7093.75083	Flank	SPRIEITPFHEL
215	500	23	1718.238172	1108.085999	16	0.644896626	277.0214997	0.161224156	1510.695285	2589.468333	1723.634151	16	0.66563245	430.9085378	0.166408113	2276.691128	Flank	SPRIEITPHHEL
216	500	24	784.0404349	564.5788114	86	0.720088896	60.88009893	0.077649183	727.2922406	1091.110075	810.6782379	86	0.742984834	87.41768257	0.080118115	1012.136436	Flank	SPRIEITPLHEL
217	500	25	460.8069478	262.3957243	104	0.56942658	25.73001766	0.05583687	433.9518757	663.0518362	397.4344923	104	0.599401842	38.9716583	0.058776186	624.4102642	Flank	SPRIEITPQHEL
218	500	26	809.7703301	375.9186517	119	0.46422873	34.46040631	0.042555778	688.7322196	1013.721719	488.8037513	119	0.482187312	44.80856642	0.044202038	862.1985563	Flank	SPRIEITPKHEL
219	500	27	4231.062789	2990.682336	108	0.706839507	287.7785419	0.068015663	3360.900199	5884.331553	4292.590181	108	0.729494955	413.0546827	0.070195685	4674.156843	Flank	SPRIEITPRHEL
220	500	28	8142.990724	4209.799537	90	0.516984445	443.7518343	0.054494945	6881.314827	11545.35414	6346.914295	90	0.549737515	669.0235095	0.057947422	9756.515672	Flank	SPRIEITPPHEL
221	500	29	3329.301546	1791.092283	42	0.537978389	276.3715394	0.083011868	3050.980968	5496.201139	3183.386187	42	0.579197541	491.2071529	0.089372121	5036.733633	Flank	SPRIEITPVHEL
222	500	30	2204.35307	2237.637881	84	1.015099583	244.1463088	0.110756445	1311.296971	3758.847715	3915.772428	84	1.04174809	427.245799	0.113664035	2236.014589	Flank	SPRIEITPAHEL
223	500	31	626.8276792	329.2240441	88	0.525222569	35.09540102	0.055988914	567.7183585	891.0991039	501.2903233	88	0.562552831	53.43772801	0.059968333	807.069211	Flank	SPRIEITPGHEL
224	500	32	1297.791985	782.2236113	108	0.602734198	75.2695021	0.057998125	1133.126249	2038.035861	1287.201965	108	0.631589458	123.8610668	0.060774724	1779.446906	Flank	SPRIEITPTHEL
225	500	33	369.3075427	226.4027233	76	0.613046573	25.97017346	0.070321265	384.4246186	482.5461946	305.790282	76	0.633701572	35.07655098	0.072690556	502.2985328	Flank	SPRIEITPDHEL
226	500	34	1244.469959	498.3516177	89	0.400452911	52.82516583	0.042447924	1208.604547	1688.897689	720.1472061	89	0.426400729	76.33545118	0.045198387	1640.223946	Flank	SPRIEITPSDEL
227	500	35	404.93216	804.1869975	90	1.985979571	84.76875256	0.209340628	468.8695426	596.5044122	1189.315176	90	1.993807843	125.364827	0.2101658	690.6903885	Flank	SPRIEITPSEEL
228	500	36	1819.249034	678.5529267	83	0.372985179	74.48085986	0.040940442	1654.336134	2442.215949	1003.217485	83	0.410781645	110.1174249	0.045089143	2220.831792	Flank	SPRIEITPSFEL
229	500	37	3158.62957	1314.920212	76	0.41629453	150.8316928	0.047752258	3046.809286	4787.872921	2228.181138	76	0.465380175	255.5899055	0.053382767	4618.374948	Flank	SPRIEITPSYEL
230	500	38	743.8272254	273.9038663	89	0.368235871	29.03375176	0.039032924	672.9653699	1092.738379	472.5771254	89	0.432470511	50.0930751	0.045841783	988.6369607	Flank	SPRIEITPSVEL
231	500	39	2156.449611	1105.984391	76	0.512872819	126.8651104	0.058830547	1960.875331	3052.761054	1652.415181	76	0.541285463	189.5450207	0.062089701	2775.897851	Flank	SPRIEITPSQEL
232	500	40	3729.722427	2169.813317	105	0.581762681	211.7520974	0.056774224	3025.578816	4956.466176	2996.002774	105	0.604463476	292.3799326	0.058989595	4020.722549	Flank	SPRIEITPSPEL
233	500	41	1065.357434	445.9521341	68	0.41859391	54.07963979	0.050761968	1036.778114	1803.264608	882.672155	68	0.489485653	107.0397214	0.059358854	1754.890161	Flank	SPRIEITPSAEL
234	500	42	1431.176354	576.8584925	84	0.403065975	62.9404216	0.043978103	1322.896789	1823.055779	795.9404143	84	0.436596852	86.84421898	0.047636622	1685.127504	Flank	SPRIEITPSGEL
235	500	43	514.7834227	256.5859934	72	0.498434841	30.23894932	0.058741109	459.4022279	726.4846624	393.1590771	72	0.541180148	46.33424158	0.063778692	648.3283217	Flank	SPRIEITPSTEL
236	500	44	752.8345721	317.7779812	77	0.422108645	36.21416192	0.048103745	699.501461	1054.22007	478.1138819	77	0.45352379	54.4861336	0.051683833	979.5358856	Flank	SPRIEITPSSEL
237	500	45	4594.017006	1593.466454	60	0.346856891	205.7156347	0.044779032	4460.890149	5965.462664	2274.473101	60	0.381273546	293.6332147	0.049222203	5792.593626	Flank	SPRIEITPStEL
238	500	46	3186.060789	671.9950194	83	0.2109172	73.76103602	0.02315117	3145.582897	4817.614803	1287.458397	83	0.267239796	141.3169182	0.029333378	4756.408534	Flank	SPRIEITPSsEL
239	500	47	85.91900166	58.01848057	67	0.675269492	7.088085534	0.082497299	75.90437942	115.5327848	79.80586505	67	0.690763797	9.74983819	0.084390229	102.0664133	Flank	SPRIEIGPSHEL
240	500	48	48.43668238	165.7795317	81	3.422602943	18.41994796	0.380289216	29.94502662	66.25580713	227.0565374	81	3.426968099	25.22850416	0.380774233	40.96135018	Flank	SPRIEGTPSHEL
241	63	1	153.5390818	64.7078616	100	0.421442286	6.47078616	0.042144229	140.9522651	205.6009129	91.7579532	100	0.446291565	9.17579532	0.044629157	188.7461749	Flank	SPRIEITPSHEL
242	63	2	-21.95288624	39.25093905	87	-1.787962577	4.208142376	-0.191689709	-26.26394594	-33.20732709	59.7905367	87	-1.800522413	6.410218386	-0.193036265	-39.72850922	Flank	Scrambled
243	63	3	685.9294908	175.8705118	64	0.256397362	21.98381397	0.03204967	674.5420023	925.6950607	283.907845	64	0.306696943	35.48848063	0.038337118	910.3270936	Flank	FPRIEITPSHEL
244	63	4	510.5501859	214.5301187	37	0.420193988	35.26853426	0.069079466	448.0354271	674.7101483	309.2591782	37	0.458358569	50.84189572	0.075353685	592.094681	Flank	HPRIEITPSHEL
245	63	5	1302.183445	560.1977741	63	0.430198814	70.57828549	0.054199956	1105.545381	1691.968612	770.8893515	63	0.455616816	97.12292916	0.057402323	1436.470484	Flank	LPRIEITPSHEL
246	63	6	1801.550072	415.9310163	68	0.230873969	50.43904451	0.027997581	1760.699581	2290.749325	610.0091519	68	0.266292407	73.97447547	0.032292698	2238.806147	Flank	YPRIEITPSHEL
247	63	7	266.0974095	155.2148452	86	0.58330085	16.7372472	0.062898948	222.1039484	351.7137321	214.5587756	86	0.610038096	23.13646778	0.0657821	293.5654607	Flank	APRIEITPSHEL
248	63	8	65.5730025	39.74663744	86	0.60614332	4.285990141	0.065362115	59.23932784	94.30037887	59.10449745	86	0.626768399	6.373401868	0.067586175	85.19193641	Flank	QPRIEITPSHEL
249	63	9	760.1433375	503.5696732	81	0.662466733	55.95218591	0.073607415	564.3291452	1113.559409	772.6342573	81	0.693841973	85.84825081	0.077093553	826.7046467	Flank	KPRIEITPSHEL
250	63	10	-28.98714855	13.84713887	114	-0.477699241	1.296903379	-0.044740633	-28.65909835	-38.37832452	19.10090092	114	-0.497700229	1.788963279	-0.046613897	-37.94399352	Flank	DPRIEITPSHEL
251	63	11	102.0054246	59.09353394	88	0.579317562	6.299391884	0.06175546	90.19078768	138.2854911	82.61692519	88	0.597437407	8.806993817	0.063687042	122.2687657	Flank	GPRIEITPSHEL
252	63	12	16.75258695	17.45425852	96	1.041884371	1.781417801	0.106336878	14.36593986	22.332816	23.57225986	96	1.055498772	2.405833697	0.107726392	19.15118498	Flank	SPRIEITGSHEL
253	63	13	-11.36420204	26.89536458	111	-2.366674271	2.552795034	-0.224634781	-13.9091889	-12.96206925	30.69107212	111	-2.367760234	2.91306765	-0.224737856	-15.86489479	Flank	SPRIEITFSHEL
254	63	14	132.2339586	69.22516772	84	0.523505221	7.553085025	0.057119102	121.0027622	172.9860982	93.71148189	84	0.541728398	10.22476093	0.059107414	158.293648	Flank	SPRIEITHSHEL
255	63	15	86.02641972	45.47848732	68	0.528657213	5.515076673	0.064109104	77.83867916	103.4504212	56.31671921	68	0.544383663	6.829405347	0.066016216	93.60431563	Flank	SPRIEITKSHEL
256	63	16	23.4240564	38.2472176	109	1.632817858	3.663419035	0.156395586	19.57545057	30.59220304	50.1908535	109	1.64064201	4.807411876	0.157145004	25.56586051	Flank	SPRIEITQSHEL
257	63	17	-13.14003864	12.65310961	83	-0.962943105	1.388859213	-0.105696737	-15.18421484	-15.53741395	15.02225958	83	-0.966844266	1.648907206	-0.106124945	-17.95454625	Flank	SPRIEITYSHEL
258	63	18	9.371055152	15.58567791	47	1.663172146	2.273404776	0.242598591	9.543868557	11.63529889	19.44767316	47	1.671437351	2.836734681	0.243804195	11.84986765	Flank	SPRIEITNSHEL
259	63	19	-8.911859248	14.3225816	72	-1.607137322	1.687932429	-0.18940295	-8.66874534	-10.81724848	17.43499534	72	-1.61177728	2.054733906	-0.189949774	-10.5221559	Flank	SPRIEITASHEL
260	63	20	23.85699274	56.73270889	77	2.378032701	6.465292209	0.271001977	15.68719283	31.6045646	75.34417527	77	2.383964982	8.586265647	0.271678024	20.78161755	Flank	SPRIEITGSHEL
261	63	21	-16.66844524	11.44702282	73	-0.686748084	1.339772683	-0.080377784	-17.8757374	-25.49970259	18.16521215	73	-0.712369569	2.126077269	-0.083376552	-27.34664097	Flank	SPRIEITPEHEL
262	63	22	413.2629205	172.7520924	44	0.418019822	26.04335783	0.063018859	359.0430366	504.1860885	222.5085004	44	0.441322173	33.54441857	0.066531821	438.0371314	Flank	SPRIEITPFHEL
263	63	23	79.34227845	80.30349883	12	1.012114857	23.18162333	0.292172393	60.94585496	119.5726651	122.6160042	12	1.025451796	35.39619151	0.296022435	91.8483619	Flank	SPRIEITPHHEL
264	63	24	29.34118492	40.08390905	69	1.36613123	4.825535586	0.164462874	30.28850001	40.83266761	56.28117804	69	1.378337036	6.775457631	0.16593228	42.15099891	Flank	SPRIEITPLHEL
265	63	25	7.084996019	14.03106336	98	1.980391143	1.417351436	0.200049715	6.369948387	10.19455032	20.27917472	98	1.989217187	2.048505994	0.20094128	9.165673378	Flank	SPRIEITPQHEL
266	63	26	47.41486517	25.65832079	102	0.541145075	2.540552329	0.053581347	44.93233034	59.35692732	33.03970391	102	0.556627599	3.271418165	0.055114345	56.2491332	Flank	SPRIEITPKHEL
267	63	27	376.7036541	262.5974273	71	0.697092859	31.16458102	0.082729702	278.9309684	523.8989135	377.236051	71	0.720055036	44.76968262	0.085454811	387.9219904	Flank	SPRIEITPRHEL
268	63	28	1221.92703	543.0200688	88	0.444396478	57.88613383	0.047372824	1061.644926	1732.48144	835.2405128	88	0.482106471	89.03693783	0.051392722	1505.229105	Flank	SPRIEITPPHEL
269	63	29	221.2455392	109.7363294	49	0.49599341	15.67661848	0.070856201	188.5136903	365.2447722	197.3871784	49	0.540424377	28.19816835	0.077203482	311.2091666	Flank	SPRIEITPVHEL
270	63	30	123.910286	131.8746377	57	1.064275146	17.46722247	0.140966687	89.29744147	211.2909686	230.2483655	57	1.089721757	30.49714103	0.144337173	152.2693839	Flank	SPRIEITPAHEL
271	63	31	5.802070405	17.37218239	76	2.994135055	1.992725986	0.343450845	3.052931537	8.248231387	24.75218746	76	3.000908473	2.839270626	0.34422781	4.340051736	Flank	SPRIEITPGHEL
272	63	32	56.83488608	29.15302161	81	0.512942378	3.239224623	0.056993598	53.05524452	89.252775	48.78189702	81	0.546558883	5.42021078	0.060728765	83.31727445	Flank	SPRIEITPTHEL
273	63	33	-5.686127916	12.90957851	89	-2.270363717	1.368412585	-0.240658073	-8.832114847	-7.429632679	16.91005124	89	-2.276027897	1.792461847	-0.241258475	-11.54025553	Flank	SPRIEITPDHEL
274	63	34	75.97300482	262.7723268	93	3.458759166	27.24822096	0.358656618	42.47162575	103.1046441	356.9337742	93	3.46185933	37.01230821	0.35897809	57.63918208	Flank	SPRIEITPSDEL
275	63	35	-0.122573765	15.83050687	56	-129.1508574	2.115440463	-17.25850928	-1.926948837	-0.180563065	23.31989639	56	-129.150978	3.116252235	-17.25852539	-2.838582847	Flank	SPRIEITPSEEL
276	63	36	108.6087297	64.45430698	73	0.593454202	7.543806031	0.069458561	97.88240272	145.7997047	90.09094659	73	0.617908978	10.54434774	0.072320776	131.4003529	Flank	SPRIEITPSFEL
277	63	37	260.334794	85.22080752	78	0.327350817	9.649356319	0.037065181	239.8275274	394.617312	153.0566518	78	0.387860966	17.33025318	0.043916606	363.532253	Flank	SPRIEITPSYEL
278	63	38	1.989555536	105.846544	74	53.2011005	12.30441081	6.184502311	17.14103369	2.922807363	155.4979811	74	53.20158388	18.07627313	6.184558503	25.18147323	Flank	SPRIEITPSVEL
279	63	39	106.2563514	66.52489534	70	0.626079236	7.951245815	0.074830781	93.32782879	150.4209742	97.70726744	70	0.6495588	11.67825214	0.077637126	132.1188121	Flank	SPRIEITPSQEL
280	63	40	245.4682961	155.520742	73	0.63356753	18.20232606	0.074153471	186.8823272	326.2053225	213.4928712	73	0.654473905	24.98745057	0.076600377	248.3498307	Flank	SPRIEITPSPEL
281	63	41	65.53419702	89.55163406	63	1.366487088	11.28244539	0.172161191	53.32047803	110.9256803	154.16923	63	1.389842547	19.42349725	0.175103702	90.25227387	Flank	SPRIEITPSAEL
282	63	42	63.57717352	31.7826788	74	0.499907074	3.694661363	0.058113017	60.01815049	80.98564045	42.70498942	74	0.527315573	4.964354182	0.06129919	76.45209887	Flank	SPRIEITPSGEL
283	63	43	-0.008934696	12.72906504	77	-1424.678033	1.45061159	-162.35713	-1.354569889	-0.01260903	17.96380811	77	-1424.678049	2.047165927	-162.3571317	-1.911627696	Flank	SPRIEITPSTEL
284	63	44	15.42601905	13.42543267	61	0.870310909	1.71895051	0.111431893	14.95427896	21.60158352	19.13843246	61	0.885973588	2.450425179	0.113437294	20.94098969	Flank	SPRIEITPSSEL
285	63	45	1049.82462	276.6655302	70	0.263534999	33.0678557	0.031498457	1036.113249	1363.227338	419.0910049	70	0.307425617	50.09095589	0.036744389	1345.422731	Flank	SPRIEITPStEL
286	63	46	659.7038001	157.1477915	86	0.23820962	16.94568216	0.025686804	671.6871842	997.5323771	288.5522829	86	0.289266083	31.11539288	0.031192364	1015.652348	Flank	SPRIEITPSsEL
287	63	47	-17.26580508	10.26466798	58	-0.594508506	1.347816937	-0.078062791	-19.29197333	-23.21682635	14.2098756	58	-0.612050733	1.865848076	-0.080366199	-25.94135592	Flank	SPRIEIGPSHEL
288	63	48	-24.3709438	8.881796035	62	-0.364442022	1.127989224	-0.046284183	-25.4656726	-33.33664637	13.44741927	62	-0.403382486	1.707823956	-0.051229627	-34.83410939	Flank	SPRIEGTPSHEL
