# Supplementary material for: Quantitative mapping of protein-peptide affinity landscapes using spectrally encoded beads
Source: eLife journal article supplement (doi:10.7554/elife.40499), 2019-07-08
Supplement: supp [file elife-40499-supp-v1.zip › elife_poa_e40499_Figure_3_source_data_7.csv]

	conc	code	AVG	SD	N	CV	SEM	RSEM	MED	AVG_NORM	SD_NORM	N_NORM	CV_NORM	SEM_NORM	RSEM_NORM	MED_NORM	library	sequence
1	1000	1	562.4787094	233.5507925	46	0.415217125	34.4351857	0.061220425	527.2546481	691.546783	301.5425479	46	0.436040707	44.46002313	0.064290695	648.2401016	Pos1to6	PEAIIITDTEIS
2	1000	2	1259.073677	397.0742329	55	0.315370133	53.54147864	0.0425245	1238.33116	1592.01683	531.1451768	55	0.333630378	71.61960103	0.044986711	1565.789266	Pos1to6	PFAIIITDTEIS
3	1000	3	1761.722242	646.5952253	49	0.3670245	92.37074646	0.052432071	1636.440169	2103.657725	788.0946716	49	0.374630655	112.5849531	0.053518665	1954.059455	Pos1to6	PHAIIITDTEIS
4	1000	4	1353.918117	424.3229333	58	0.313403689	55.71633075	0.041151921	1361.64637	1653.382076	552.7433408	58	0.334310713	72.57875637	0.043897147	1662.819688	Pos1to6	PQAIIITDTEIS
5	1000	5	1464.9814	482.0435585	74	0.329044149	56.03642544	0.038250605	1377.932372	1780.265247	612.7981558	74	0.344217333	71.23633863	0.040014452	1674.482089	Pos1to6	PYAIIITDTEIS
6	1000	6	1268.130956	473.069295	47	0.373044513	69.00424869	0.054414135	1189.447348	1538.158854	602.7771087	47	0.391882221	87.92407783	0.057161897	1442.720849	Pos1to6	PAAIIITDTEIS
7	1000	7	900.5894267	335.1867977	91	0.372186024	35.13712375	0.039015697	809.6661573	1103.442228	432.69529	91	0.392132256	45.35879115	0.04110663	992.0389938	Pos1to6	PGAIIITDTEIS
8	1000	8	904.2875936	335.4689185	73	0.370975916	39.26366707	0.043419447	870.3921344	1130.548326	437.0272802	73	0.386562228	51.15017424	0.045243687	1088.171924	Pos1to6	PRAIIITDTEIS
9	1000	9	22194.43075	4593.710052	30	0.2069758	838.6928727	0.037788438	21546.01842	27707.41571	6412.390534	30	0.231432285	1170.736981	0.042253561	26897.94102	Pos1to6	PPAIIITDTEIS
10	1000	10	32020.13088	8620.127274	101	0.26920962	857.7347222	0.026787358	32865.26814	42002.01221	12134.67234	101	0.288906929	1207.445027	0.028747314	43110.61059	Pos1to6	PPKIIITDTEIS
11	1000	11	810.9085122	462.1567782	93	0.569924685	47.92342544	0.059098437	765.879697	916.777211	527.7505864	93	0.575658492	54.72518649	0.059693005	865.869629	Pos1to6	PIFIIITDTEIS
12	1000	12	8458.616121	2036.606286	119	0.240772989	186.6953922	0.022071624	8625.254632	10377.67031	2805.782362	119	0.270367267	257.2056475	0.024784527	10582.11505	Pos1to6	PIPIIITDTEIS
13	1000	13	3330.736943	928.8892032	48	0.278883988	134.0736079	0.040253436	3260.608578	4157.705817	1247.615827	48	0.300073137	180.0778334	0.043311827	4070.165697	Pos1to6	PIQIIITDTEIS
14	1000	14	806.6182488	354.8666976	66	0.4399438	43.68107091	0.054153338	699.8071395	940.6259879	422.5621117	66	0.449234996	52.01380036	0.055297005	816.0697864	Pos1to6	PIYIIITDTEIS
15	1000	15	995.0678457	588.3509306	61	0.591267151	75.33061746	0.075704001	859.4896404	1193.894859	715.2397912	61	0.599081055	91.57707127	0.076704469	1031.226431	Pos1to6	PIVIIITDTEIS
16	1000	16	1068.866106	547.015894	71	0.511772139	64.91884297	0.060736179	878.5888208	1234.280019	640.7268874	71	0.519109827	76.04029179	0.061607002	1014.556098	Pos1to6	PIIIIITDTEIS
17	1000	17	5857.773955	2210.716617	68	0.377398758	268.0887683	0.045766322	6070.458774	6800.185547	2649.789477	68	0.389664291	321.3341736	0.047253736	7047.087569	Pos1to6	PIKIIITDTEIS
18	1000	18	1837.006679	927.5448382	64	0.504921865	115.9431048	0.063115233	1622.277631	2063.746138	1056.918628	64	0.512135969	132.1148286	0.064016996	1822.51335	Pos1to6	PISIIITDTEIS
19	1000	19	1613.960655	608.1747134	47	0.376821276	88.71139941	0.054965032	1528.303371	1791.781342	683.9237687	47	0.381700463	99.76053471	0.055676735	1696.68663	Pos1to6	PIGIIITDTEIS
20	1000	20	1207.8998	534.868404	66	0.442808587	65.83774933	0.054505969	1089.011019	1403.209444	632.4017082	66	0.450682335	77.84326917	0.055475161	1265.097111	Pos1to6	PIAFIITDTEIS
21	1000	21	488.6214002	152.323288	84	0.311740926	16.61983327	0.034013724	460.9926049	569.3548495	184.3758619	84	0.323832952	20.1170558	0.035333072	537.1610311	Pos1to6	PIAYIITDTEIS
22	1000	22	826.6963141	413.8024547	68	0.500549534	50.18091849	0.060700547	731.0196769	897.5038528	453.5174751	68	0.505309781	54.99707214	0.061277812	793.632396	Pos1to6	PIALIITDTEIS
23	1000	23	1117.117756	478.9753693	79	0.428759964	53.88893929	0.048239265	1086.367339	1370.229308	605.8982174	79	0.44218746	68.16887536	0.049749976	1332.511599	Pos1to6	PIAAIITDTEIS
24	1000	24	1055.024854	489.6413513	29	0.464104091	90.92411631	0.086181966	986.9432853	1161.435484	551.6091128	29	0.474937369	102.4312407	0.088193655	1086.487154	Pos1to6	PIAVIITDTEIS
25	1000	25	833.8919958	605.7300102	75	0.726389045	69.94367689	0.083876182	770.0382285	1138.168691	844.1807858	75	0.741700938	97.47760079	0.085644247	1051.015488	Pos1to6	PIAGIITDTEIS
26	1000	26	1401.744405	480.728114	58	0.342949907	63.12269383	0.045031529	1428.400202	1861.698733	679.7363416	58	0.365116186	89.2537543	0.047942104	1897.101096	Pos1to6	PIAIHITDTEIS
27	1000	27	1351.619378	495.701578	89	0.366746427	52.54426218	0.038875044	1250.073822	1560.525317	591.2505635	89	0.378879187	62.67243439	0.040161114	1443.284906	Pos1to6	PIAIYITDTEIS
28	1000	28	1263.242981	582.7620787	42	0.461322238	89.92214098	0.071183567	1183.305202	1509.800167	708.1207845	42	0.469016231	109.2654092	0.072370776	1414.260295	Pos1to6	PIAIFITDTEIS
29	1000	29	1245.724271	429.0353254	52	0.344406331	59.4964948	0.047760565	1139.451546	1379.816798	486.1101677	52	0.352300514	67.41135136	0.048855291	1262.104641	Pos1to6	PIAIQITDTEIS
30	1000	30	964.8835805	894.0013833	66	0.926538083	110.0439632	0.114048954	824.4957283	1291.358222	1204.603903	66	0.932819324	148.2764905	0.114822121	1103.469226	Pos1to6	PIAIEITDTEIS
31	1000	31	1477.590052	722.4510669	45	0.488938773	107.6966464	0.072886689	1399.226746	1687.720735	832.0290208	45	0.492989749	124.0315633	0.073490573	1598.213246	Pos1to6	PIAILITDTEIS
32	1000	32	2679.77233	743.5089739	41	0.277452292	116.1165935	0.043330768	2595.309042	3281.909541	978.8903895	41	0.298268547	152.8769946	0.046581721	3178.467592	Pos1to6	PIAIIITDTEIS
33	1000	33	242.545737	260.0311403	99	1.072091159	26.13411291	0.107749216	175.497019	302.2876334	326.8871812	99	1.08137795	32.85339784	0.108682573	218.7240196	Pos1to6	SCRAMBLED
34	1000	34	918.4775225	339.1664898	54	0.369270321	46.15471321	0.050251326	912.1473908	1109.643986	425.2631651	54	0.383242887	57.87098672	0.052152751	1101.996339	Pos1to6	PIAIAITDTEIS
35	1000	35	922.2145538	385.2274889	15	0.417720028	99.46530993	0.107854847	841.4133966	1049.429326	452.2069064	15	0.430907442	116.7593212	0.111259823	957.4820629	Pos1to6	PIAIIDTDTEIS
36	1000	36	709.5019505	369.4673117	51	0.520741784	51.73577183	0.072918435	675.7269023	791.5002817	415.0399832	51	0.524371239	58.11722225	0.07342666	753.8217944	Pos1to6	PIAIIFTDTEIS
37	1000	37	878.9645855	293.6571918	45	0.334094452	43.77582953	0.04980386	858.0595091	982.7666755	338.4244391	45	0.344358888	50.44933673	0.051333992	959.3927958	Pos1to6	PIAIIHTDTEIS
38	1000	38	1307.70546	2303.707119	126	1.761640668	205.2305419	0.156939424	733.1336057	1681.901197	2970.662467	126	1.766252663	264.6476468	0.157350293	942.9174436	Pos1to6	PIAIILTDTEIS
39	1000	39	924.1933245	224.9770496	105	0.243430724	21.95551192	0.023756406	899.9252517	1068.589112	278.0685067	105	0.260220232	27.13670759	0.025394894	1040.5294	Pos1to6	PIAIIRTDTEIS
40	1000	40	713.0054271	342.9911128	23	0.481049793	71.51859091	0.100305816	645.1433459	817.1031719	398.3058408	23	0.487460892	83.05250901	0.101642622	739.3333266	Pos1to6	PIAIISTDTEIS
41	1000	41	987.9500466	282.6840921	47	0.286131969	41.23371269	0.041736637	994.5444358	1144.59848	347.2388185	47	0.303371728	50.64998731	0.044251314	1152.23847	Pos1to6	PIAIIQTDTEIS
42	1000	42	1013.60109	391.7968713	42	0.386539513	60.45556975	0.059644342	976.1232477	1136.731988	445.2649775	42	0.391706209	68.70587766	0.06044158	1094.701388	Pos1to6	PIAIIATDTEIS
43	1000	43	1010.699441	370.770584	41	0.366845542	57.9046369	0.057291648	912.582695	1281.486801	505.728591	41	0.39464206	78.98153655	0.061632735	1157.082542	Pos1to6	PIAIIGTDTEIS
44	1000	44	465.4335802	307.5336003	41	0.660746481	48.02867927	0.103191264	379.5196307	519.2516501	344.5099871	41	0.663474034	53.8034207	0.103617236	423.4034735	Pos1to6	PIAIIYTDTEIS
45	1000	45	2236.742982	780.6427965	34	0.349008716	133.8791351	0.059854501	2157.00035	2596.234263	947.8892122	34	0.365101573	162.5616588	0.062614403	2503.675326	Pos1to6	PIAIIIEDTEIS
46	1000	46	898.6271133	370.6143902	38	0.412422889	60.12159306	0.066903827	838.2282767	977.000155	410.983375	38	0.420658454	66.67030715	0.068239812	911.3336824	Pos1to6	PIAIIIQDTEIS
47	1000	47	1197.637896	483.4648278	34	0.403681972	82.91353394	0.069230887	1059.675703	1440.932643	591.1816698	34	0.410277103	101.3868199	0.070361943	1274.944051	Pos1to6	PIAIIIRDTEIS
48	1000	48	783.0593536	1023.274405	33	1.306764806	178.1292098	0.227478554	551.2644859	897.0867087	1174.865322	33	1.309645222	204.5178013	0.22797997	631.5383898	Pos1to6	PIAIIIIDTEIS
49	125	1	30.11936867	53.42017288	54	1.773615293	7.269564752	0.24135847	20.03035789	37.03065052	65.86291783	54	1.778605477	8.96280787	0.242037548	24.62658466	Pos1to6	PEAIIITDTEIS
50	125	2	131.2055963	58.73560097	36	0.447660791	9.789266828	0.074610132	130.033587	165.9009487	76.43175575	36	0.460707165	12.73862596	0.076784527	164.4190192	Pos1to6	PFAIIITDTEIS
51	125	3	238.4234815	103.3199873	44	0.433346526	15.57607415	0.065329447	223.3447449	284.6994757	125.2128735	44	0.43980718	18.87655092	0.066303427	266.6940831	Pos1to6	PHAIIITDTEIS
52	125	4	213.3674254	80.19434009	55	0.375850906	10.81340261	0.050679726	215.9639403	260.560718	102.5185354	55	0.393453534	13.82359649	0.053053264	263.7315384	Pos1to6	PQAIIITDTEIS
53	125	5	162.7454102	156.7536389	76	0.963183163	17.98087555	0.110484686	141.2343809	197.7704276	191.5350511	76	0.968471644	21.97057716	0.111091316	171.6299333	Pos1to6	PYAIIITDTEIS
54	125	6	195.3919011	94.93543171	43	0.485871887	14.47751761	0.074094768	169.4403278	236.9974341	118.612648	43	0.500480726	18.08825924	0.076322595	205.5198945	Pos1to6	PAAIIITDTEIS
55	125	7	108.5349313	74.73336916	79	0.688565131	8.408160943	0.07746963	106.9288411	132.981826	93.02715184	79	0.69954786	10.4663723	0.078705283	131.0139728	Pos1to6	PGAIIITDTEIS
56	125	8	195.4546069	697.2674101	78	3.567413535	78.94998751	0.403930042	96.10394857	244.3590736	872.1341559	78	3.569068024	98.74974754	0.404117376	120.1500042	Pos1to6	PRAIIITDTEIS
57	125	9	5265.241393	1472.072866	23	0.279583167	306.9484112	0.05829712	5199.407758	6573.100871	1959.71762	23	0.298142027	408.6293713	0.06216691	6490.914491	Pos1to6	PPAIIITDTEIS
58	125	10	11860.71211	2967.806591	85	0.250221619	321.9038213	0.027140345	11838.63915	15558.14299	4220.940325	85	0.271301037	457.8252586	0.029426729	15529.18906	Pos1to6	PPKIIITDTEIS
59	125	11	66.75295402	154.2413409	77	2.310629441	17.57743212	0.263320663	42.48828004	75.46793022	174.4856569	77	2.312050382	19.88448604	0.263482594	48.03536563	Pos1to6	PIFIIITDTEIS
60	125	12	1253.127421	400.2207602	86	0.319377546	43.15691447	0.034439366	1196.411346	1537.431544	526.1719775	86	0.342240915	56.73858351	0.036904787	1467.84797	Pos1to6	PIPIIITDTEIS
61	125	13	483.7102627	283.5379943	46	0.586173204	41.80539652	0.086426524	429.880487	603.8078082	360.1988812	46	0.596545583	53.10842764	0.087955848	536.6129575	Pos1to6	PIQIIITDTEIS
62	125	14	105.8059385	181.4015769	61	1.714474438	23.22609192	0.219515958	62.87501918	123.3840364	211.8358431	61	1.716882096	27.12280041	0.219824227	73.32077736	Pos1to6	PIYIIITDTEIS
63	125	15	126.4566217	130.6553539	34	1.033202944	22.40720833	0.177192843	97.02684643	151.7242379	157.4433863	34	1.037694362	27.00131798	0.177963115	116.4140251	Pos1to6	PIVIIITDTEIS
64	125	16	125.2188907	119.498187	40	0.954314372	18.89432236	0.150890351	77.59584218	144.5973203	138.5631849	40	0.958269383	21.90876321	0.151515693	89.60429843	Pos1to6	PIIIIITDTEIS
65	125	17	869.9786168	343.1874215	52	0.394477996	47.59153251	0.054704255	804.6693715	1009.942695	410.2671729	52	0.40622817	56.89382032	0.056333711	934.1263545	Pos1to6	PIKIIITDTEIS
66	125	18	228.7813996	166.218265	43	0.726537495	25.34804778	0.110795929	176.6382417	257.0196044	188.0276964	43	0.731569473	28.67395489	0.111563299	198.4404811	Pos1to6	PISIIITDTEIS
67	125	19	236.1810491	153.8646996	37	0.651469287	25.2952008	0.107100891	199.8273569	262.2026725	171.5601526	37	0.6543036	28.20431536	0.107566849	221.8436543	Pos1to6	PIGIIITDTEIS
68	125	20	212.8732835	252.2780709	41	1.185109126	39.39921537	0.18508295	151.5043263	247.293527	293.8028988	41	1.188073551	45.88430395	0.185545916	176.0016034	Pos1to6	PIAFIITDTEIS
69	125	21	44.20653123	44.10251607	66	0.997647064	5.428644459	0.122801865	37.94740509	51.51064387	51.58746723	66	1.001491408	6.349978257	0.123275071	44.21734108	Pos1to6	PIAYIITDTEIS
70	125	22	102.8668835	208.0405039	44	2.022424485	31.36328602	0.304891963	61.24862103	111.6775564	225.9915855	44	2.023607901	34.0695134	0.30507037	66.49463947	Pos1to6	PIALIITDTEIS
71	125	23	172.9682822	97.67918849	72	0.564723123	11.51160276	0.066553258	145.4320435	212.1586631	121.9878825	72	0.574984216	14.37640982	0.06776254	178.3833864	Pos1to6	PIAAIITDTEIS
72	125	24	253.1321771	147.7674484	19	0.583756084	33.90017762	0.13392283	218.0155487	278.6632858	165.0816128	19	0.592405319	37.87231936	0.135907101	240.0047669	Pos1to6	PIAVIITDTEIS
73	125	25	65.862325	72.18909433	64	1.096060522	9.023636791	0.137007565	62.38748878	89.89465855	99.44754422	64	1.106267556	12.43094303	0.138283445	85.15189833	Pos1to6	PIAGIITDTEIS
74	125	26	201.8311784	142.8186148	50	0.707614235	20.19760221	0.100071765	176.8156856	268.0580337	192.6315642	50	0.718618881	27.24221706	0.101628057	234.8342084	Pos1to6	PIAIHITDTEIS
75	125	27	132.3943717	86.63952976	85	0.654404931	9.397376428	0.070980181	122.4590392	152.8572114	101.0815407	85	0.661280811	10.96383245	0.071725975	141.3862764	Pos1to6	PIAIYITDTEIS
76	125	28	152.8743615	227.2492782	50	1.486510073	32.13790113	0.210224271	113.2674332	182.7120673	272.0428811	50	1.488915785	38.47267319	0.21056449	135.3747396	Pos1to6	PIAIFITDTEIS
77	125	29	208.4247695	119.1393893	43	0.571618189	18.16858654	0.087170957	183.0366013	230.8600747	133.0698148	43	0.576408957	20.29295652	0.087901542	202.7390676	Pos1to6	PIAIQITDTEIS
78	125	30	95.9801614	60.47103201	55	0.630036782	8.153912292	0.084954142	99.59052887	128.4556739	82.11376784	55	0.639238154	11.0722182	0.086194855	133.2876327	Pos1to6	PIAIEITDTEIS
79	125	31	171.5974463	98.00543447	21	0.57113574	21.38653914	0.124632036	149.9177535	196.0006214	112.6234309	21	0.57460752	24.57644749	0.125389641	171.2378213	Pos1to6	PIAILITDTEIS
80	125	32	353.0690104	133.8492991	25	0.379102371	26.76985982	0.075820474	319.6129048	432.4026114	170.6226734	25	0.394592144	34.12453468	0.078918429	391.4290142	Pos1to6	PIAIIITDTEIS
81	125	33	-35.47208389	46.11179926	101	-1.299946161	4.588295517	-0.129349478	-41.67661437	-44.20927954	57.80874833	101	-1.307615707	5.752185451	-0.130112626	-51.94205959	Pos1to6	SCRAMBLED
82	125	34	135.4543732	87.50848256	26	0.646036599	17.16182539	0.126698201	133.5104632	163.647043	107.0454109	26	0.65412371	20.99333226	0.128284214	161.2985391	Pos1to6	PIAIAITDTEIS
83	125	35	91.28153937	99.73959715	15	1.092659018	25.75265325	0.282123345	52.45365697	103.87336	114.0288671	15	1.097768159	29.4421269	0.28344252	59.68937015	Pos1to6	PIAIIDTDTEIS
84	125	36	101.6473522	98.28622837	47	0.966933484	14.33651987	0.141041744	66.94198889	113.3949073	109.8675264	47	0.968892952	16.02582581	0.141327562	74.6785869	Pos1to6	PIAIIFTDTEIS
85	125	37	91.06870127	62.1710154	54	0.682682574	8.460403585	0.092901331	93.0535661	101.823539	70.03057321	54	0.687764086	9.529953931	0.093592837	104.0428082	Pos1to6	PIAIIHTDTEIS
86	125	38	144.7936385	225.6384898	116	1.558345326	20.95000783	0.144688731	91.58858307	186.2258754	291.1747882	116	1.563557092	27.03490038	0.145172631	117.7963634	Pos1to6	PIAIILTDTEIS
87	125	39	139.9765168	147.7043419	86	1.055208011	15.92736881	0.113786006	120.9602246	161.8464209	171.4289024	86	1.05920725	18.48565395	0.114217255	139.8590268	Pos1to6	PIAIIRTDTEIS
88	125	40	77.71478968	68.86089628	21	0.886071963	15.02667951	0.193356754	77.0335257	89.0610348	79.22592248	21	0.889568852	17.28851366	0.194119838	88.28030727	Pos1to6	PIAIISTDTEIS
89	125	41	163.6325488	96.29569403	34	0.588487405	16.51457528	0.100924757	141.0933063	189.5779724	113.189374	34	0.597059735	19.4118175	0.1023949	163.4649288	Pos1to6	PIAIIQTDTEIS
90	125	42	180.9994816	122.4308721	33	0.676415596	21.31247924	0.117748841	138.6467619	202.9870553	137.9056194	33	0.679381349	24.00628697	0.118265113	155.4893842	Pos1to6	PIAIIATDTEIS
91	125	43	159.0074108	63.7019463	28	0.400622499	12.03853628	0.075710536	164.9957185	201.6087967	85.93008034	28	0.42622188	16.23925877	0.080548364	209.2014964	Pos1to6	PIAIIGTDTEIS
92	125	44	90.75204779	346.9697471	36	3.823271822	57.82829119	0.63721197	29.69932718	101.2457042	387.1376688	36	3.823744148	64.5229448	0.637290691	33.13345943	Pos1to6	PIAIIYTDTEIS
93	125	45	292.7930662	134.3608987	33	0.458893718	23.38923029	0.079883143	252.3341493	339.8510229	160.1544181	33	0.471248892	27.87930569	0.082033903	292.8895137	Pos1to6	PIAIIIEDTEIS
94	125	46	99.73493655	59.9039017	30	0.60063107	10.93690608	0.109659729	96.01664522	108.4332389	65.74476179	30	0.606315577	12.00329636	0.110697573	104.3906598	Pos1to6	PIAIIIQDTEIS
95	125	47	223.6388914	183.6323542	25	0.821111002	36.72647084	0.1642222	168.3776455	269.0701253	221.8142444	25	0.824373364	44.36284888	0.164874673	202.582806	Pos1to6	PIAIIIRDTEIS
96	125	48	70.0141611	80.2907123	40	1.146778181	12.69507629	0.181321551	50.20208471	80.20946696	92.24564867	40	1.150059365	14.5853177	0.181840352	57.51240022	Pos1to6	PIAIIIIDTEIS
97	2000	1	964.5523568	297.5895626	44	0.308526085	44.86331457	0.046512057	954.3083358	1185.881471	398.4889653	44	0.336027651	60.07447187	0.050658074	1173.286826	Pos1to6	PEAIIITDTEIS
98	2000	2	1923.863723	543.235399	50	0.282366881	76.82508689	0.039932707	1835.177592	2432.600636	736.1660614	50	0.302625121	104.1096028	0.042797655	2320.462787	Pos1to6	PFAIIITDTEIS
99	2000	3	2674.592934	810.3019482	58	0.302962719	106.3978584	0.039780954	2573.251909	3193.708948	996.8647359	58	0.312133871	130.8947525	0.040985185	3072.698482	Pos1to6	PHAIIITDTEIS
100	2000	4	2216.689576	659.5730387	55	0.297548672	88.93681039	0.040121455	2283.473202	2706.984097	864.8676183	55	0.319494902	116.6187259	0.043080684	2788.53914	Pos1to6	PQAIIITDTEIS
101	2000	5	1784.167403	685.7503775	109	0.384353159	65.68297367	0.036814356	1744.045858	2168.144403	861.6645343	109	0.39742027	82.532494	0.038065958	2119.388158	Pos1to6	PYAIIITDTEIS
102	2000	6	1916.835961	638.3625392	42	0.3330293	98.50147828	0.051387537	1810.403302	2324.995057	823.0547582	42	0.354002799	127.0001064	0.054623818	2195.899291	Pos1to6	PAAIIITDTEIS
103	2000	7	1548.160574	551.3168201	82	0.356110877	60.88275779	0.039325868	1490.249768	1896.875206	714.9489148	82	0.376908777	78.95289973	0.041622611	1825.92031	Pos1to6	PGAIIITDTEIS
104	2000	8	1956.900282	2861.74832	73	1.462388424	334.9423063	0.171159619	1655.633922	2446.533994	3587.645973	73	1.466419834	419.9022005	0.17163146	2069.888133	Pos1to6	PRAIIITDTEIS
105	2000	9	25203.11243	6014.873557	26	0.238655982	1179.613755	0.046804289	27724.42845	31463.43879	8185.248457	26	0.260151108	1605.259293	0.05101983	34611.03702	Pos1to6	PPAIIITDTEIS
106	2000	10	34233.78036	11150.1196	72	0.32570518	1314.054197	0.038384724	37019.30284	44905.73964	15365.19675	72	0.342165542	1810.805802	0.040324596	48559.61443	Pos1to6	PPKIIITDTEIS
107	2000	11	1261.452608	424.5279134	91	0.336538932	44.50261744	0.035278866	1158.957712	1426.14239	493.6739848	91	0.346160375	51.75109526	0.036287467	1310.266205	Pos1to6	PIFIIITDTEIS
108	2000	12	10770.80236	4041.9472	90	0.375268904	426.0586445	0.039556816	11479.61032	13214.43536	5218.507134	90	0.394909581	550.0789509	0.041627125	14084.05459	Pos1to6	PIPIIITDTEIS
109	2000	13	4611.804202	1434.744106	63	0.311102563	180.7607667	0.039195239	4527.392727	5756.84165	1901.086701	63	0.330230848	239.514411	0.041605176	5651.472151	Pos1to6	PIQIIITDTEIS
110	2000	14	1231.657953	523.5143121	44	0.425048457	78.92275207	0.064078466	1142.320635	1436.279777	624.2907395	44	0.43465817	94.11537014	0.065527185	1332.10038	Pos1to6	PIYIIITDTEIS
111	2000	15	1457.461318	710.5010977	54	0.48749225	96.68695283	0.066339293	1314.257382	1748.680336	868.990255	54	0.4969406	118.2545953	0.06762505	1576.862461	Pos1to6	PIVIIITDTEIS
112	2000	16	1490.680501	519.3909141	59	0.348425376	67.61893748	0.04536112	1421.597344	1721.372908	618.1731071	59	0.359116322	80.47928361	0.046752963	1641.598687	Pos1to6	PIIIIITDTEIS
113	2000	17	8173.304835	3106.224103	45	0.380045057	463.0485499	0.056653772	8217.40485	9488.244141	3721.553549	45	0.392227845	554.7764478	0.058469875	9539.439064	Pos1to6	PIKIIITDTEIS
114	2000	18	2640.828197	1128.952012	61	0.427499227	144.5474932	0.054735667	2615.686565	2966.782351	1293.506048	61	0.435996273	165.6164785	0.055823602	2938.537518	Pos1to6	PISIIITDTEIS
115	2000	19	2521.530478	898.7906448	31	0.356446473	161.4275652	0.064019676	2598.440626	2799.344116	1012.244759	31	0.361600688	181.8045257	0.064945401	2884.727963	Pos1to6	PIGIIITDTEIS
116	2000	20	1573.870399	581.50062	59	0.369471731	75.70493246	0.048101122	1448.492656	1828.35514	692.7137485	59	0.378872645	90.18364854	0.049325017	1682.704621	Pos1to6	PIAFIITDTEIS
117	2000	21	832.0607844	241.7436557	73	0.290536052	28.29395479	0.034004673	833.0480254	969.5396936	294.2302567	73	0.303474173	34.43704679	0.035518965	970.6900535	Pos1to6	PIAYIITDTEIS
118	2000	22	1221.438815	538.1061826	62	0.440551075	68.33955353	0.055950042	1173.61476	1326.056526	591.3578599	62	0.445952226	75.10252331	0.056635989	1274.136283	Pos1to6	PIALIITDTEIS
119	2000	23	1794.538608	537.1560366	80	0.299328214	60.05587062	0.033465912	1806.443369	2201.137151	700.5428829	80	0.318264077	78.32307537	0.035583006	2215.739239	Pos1to6	PIAAIITDTEIS
120	2000	24	1747.634774	619.9907831	10	0.354759926	196.0583003	0.112184939	1667.784215	1923.90258	709.5719487	10	0.368819064	224.3863522	0.116630829	1835.998231	Pos1to6	PIAVIITDTEIS
121	2000	25	1408.876797	499.453082	75	0.354504441	57.67187426	0.040934647	1356.772927	1922.95821	740.1581715	75	0.38490601	85.46610391	0.044445118	1851.842294	Pos1to6	PIAGIITDTEIS
122	2000	26	2297.712997	731.0174983	63	0.318150047	92.09954784	0.040083138	2245.7766	3051.661457	1043.44799	63	0.341927833	131.4620898	0.043078858	2982.683173	Pos1to6	PIAIHITDTEIS
123	2000	27	1989.547555	735.2771737	87	0.369570042	78.82998745	0.039622067	2008.806494	2297.051507	876.584809	87	0.38161304	93.97975616	0.040913212	2319.287103	Pos1to6	PIAIYITDTEIS
124	2000	28	1671.12467	680.3647742	53	0.407129873	93.45528907	0.055923589	1702.494034	1997.291372	830.5292585	53	0.415827791	114.0819673	0.05711834	2034.783343	Pos1to6	PIAIFITDTEIS
125	2000	29	1858.799544	596.0417508	44	0.32065951	89.85667485	0.04834124	1657.971979	2058.884855	677.6279362	44	0.329123765	102.1562551	0.049617275	1836.439766	Pos1to6	PIAIQITDTEIS
126	2000	30	1413.832781	532.7795472	47	0.376833494	77.71388412	0.054966814	1401.728343	1892.212308	741.7920027	47	0.392023664	108.2014842	0.057182528	1876.012254	Pos1to6	PIAIEITDTEIS
127	2000	31	2103.709069	627.3300934	30	0.298201925	114.5342811	0.054443974	1935.844109	2402.88124	732.3947187	30	0.30479855	133.7163695	0.055648347	2211.143909	Pos1to6	PIAILITDTEIS
128	2000	32	4241.627938	1279.505109	38	0.301654253	207.5631371	0.048934782	4280.580541	5194.709655	1667.005238	38	0.32090441	270.4239588	0.052057569	5242.414797	Pos1to6	PIAIIITDTEIS
129	2000	33	384.8059822	226.844121	85	0.589502584	24.60469951	0.063940533	338.421731	479.5882669	290.7397275	85	0.606227774	31.5351511	0.065754634	421.7790237	Pos1to6	SCRAMBLED
130	2000	34	1379.183549	524.9341306	43	0.380612233	80.05170444	0.058042821	1363.710901	1666.238633	656.8028903	43	0.394182968	100.1615018	0.060112339	1647.5456	Pos1to6	PIAIAITDTEIS
131	2000	35	1200.782787	466.0549464	25	0.388125939	93.21098927	0.077625188	1023.45924	1366.424619	549.6916613	25	0.402284659	109.9383323	0.080456932	1164.640198	Pos1to6	PIAIIDTDTEIS
132	2000	36	1113.608481	485.5848145	70	0.436046261	58.03848626	0.052117497	921.9554666	1242.310082	547.0814438	70	0.440374309	65.38873933	0.052634797	1028.507407	Pos1to6	PIAIIFTDTEIS
133	2000	37	1601.696713	372.7121841	64	0.232698351	46.58902301	0.029087294	1562.397674	1790.850484	442.714985	64	0.24720935	55.33937312	0.030901169	1746.910391	Pos1to6	PIAIIHTDTEIS
134	2000	38	2131.343824	3830.462283	120	1.797205237	349.6717663	0.164061641	1210.547278	2741.221047	4938.929773	120	1.801726197	450.8605411	0.164474347	1556.941513	Pos1to6	PIAIILTDTEIS
135	2000	39	1553.452556	528.0532172	103	0.339922333	52.03062954	0.033493543	1532.260705	1796.163684	632.5027758	103	0.352140944	62.32235035	0.034697478	1771.660823	Pos1to6	PIAIIRTDTEIS
136	2000	40	1601.979628	1504.103322	17	0.938902902	364.7986393	0.227717402	1289.794513	1835.8663	1729.760084	17	0.942203735	419.5284432	0.228517972	1478.102617	Pos1to6	PIAIISTDTEIS
137	2000	41	1883.64781	705.2482439	45	0.374405576	105.132201	0.055813088	1694.41379	2182.317241	846.1720517	45	0.387740167	126.1398819	0.057800891	1963.078453	Pos1to6	PIAIIQTDTEIS
138	2000	42	1417.120915	494.0859825	24	0.348654781	100.8548789	0.071168859	1481.144558	1589.270859	563.1966837	24	0.354374259	114.9620416	0.072336343	1661.072007	Pos1to6	PIAIIATDTEIS
139	2000	43	1540.451123	537.9284766	38	0.349201912	87.26352195	0.05664803	1569.199697	1953.169954	738.878486	38	0.378297078	119.861918	0.06136789	1989.620869	Pos1to6	PIAIIGTDTEIS
140	2000	44	750.4170075	339.8820022	27	0.452924173	65.41032182	0.087165298	676.9299714	837.1877021	382.5060934	27	0.456894066	73.61333201	0.087929304	755.2033624	Pos1to6	PIAIIYTDTEIS
141	2000	45	3346.78879	1009.362022	35	0.301591192	170.6133215	0.050978216	3378.626043	3884.687601	1243.39937	35	0.320077056	210.1728536	0.054102897	3921.641765	Pos1to6	PIAIIIEDTEIS
142	2000	46	1282.363735	554.5516717	31	0.432444911	99.60042048	0.077669399	1228.188427	1394.204057	613.8766074	31	0.44030614	110.2554935	0.079081317	1335.303894	Pos1to6	PIAIIIQDTEIS
143	2000	47	1986.551408	489.0224443	34	0.246166519	83.8666573	0.04221721	1964.21279	2390.110382	613.8728597	34	0.256838707	105.2783269	0.044047475	2363.233774	Pos1to6	PIAIIIRDTEIS
144	2000	48	988.5312724	378.6187506	44	0.383011404	57.07892429	0.057741142	890.2503504	1132.47899	444.754481	44	0.392726474	67.04926078	0.059205744	1019.886619	Pos1to6	PIAIIIIDTEIS
145	250	1	89.26459604	83.46179931	30	0.934993301	15.23797006	0.170705641	72.3218027	109.7475214	103.6483105	30	0.944425069	18.9235059	0.172427638	88.91698327	Pos1to6	PEAIIITDTEIS
146	250	2	301.1747267	104.3002751	50	0.346311512	14.75028636	0.048975844	296.6507104	380.815867	138.2432786	50	0.363018694	19.55055195	0.051338596	375.0955424	Pos1to6	PFAIIITDTEIS
147	250	3	511.8719995	169.850715	39	0.331822634	27.19788142	0.053134146	553.0388644	611.2220533	207.9479512	39	0.340216702	33.29832151	0.054478272	660.3790608	Pos1to6	PHAIIITDTEIS
148	250	4	405.8665231	161.1789155	63	0.397122961	20.30663462	0.05003279	404.5682076	495.6373845	205.1055213	63	0.413821733	25.84086676	0.052136638	494.0519034	Pos1to6	PQAIIITDTEIS
149	250	5	312.065422	145.7048541	61	0.466904834	18.65559491	0.059781038	279.4720718	379.2261293	181.1636072	61	0.477719211	23.19562303	0.061165677	339.6182484	Pos1to6	PYAIIITDTEIS
150	250	6	291.345945	107.4482183	45	0.368799429	16.01743468	0.054977373	287.6326446	353.3833337	137.0573859	45	0.387843378	20.43130878	0.057816277	348.8793463	Pos1to6	PAAIIITDTEIS
151	250	7	228.7760635	102.9131196	75	0.449842164	11.88338346	0.051943299	208.7758735	280.3066101	130.757323	75	0.466479627	15.09855513	0.053864428	255.8014876	Pos1to6	PGAIIITDTEIS
152	250	8	233.1395354	119.5593721	69	0.512823241	14.393257	0.061736663	202.4952221	291.4731037	152.792776	69	0.524208835	18.39408868	0.063107328	253.1613128	Pos1to6	PRAIIITDTEIS
153	250	9	6497.620298	2106.190778	14	0.324148024	562.9031632	0.086632203	6094.350007	8111.596496	2760.254388	14	0.340284972	737.7090157	0.090944984	7608.155893	Pos1to6	PPAIIITDTEIS
154	250	10	17379.17878	4601.650824	61	0.264779532	589.1810141	0.033901545	17110.60063	22796.92366	6492.185808	61	0.284783417	831.2392148	0.03646278	22444.61957	Pos1to6	PPKIIITDTEIS
155	250	11	139.7391199	106.5547377	83	0.762526183	11.69590193	0.083698122	119.1926997	157.9828534	121.1445991	83	0.766821187	13.29734727	0.08416956	134.7539817	Pos1to6	PIFIIITDTEIS
156	250	12	2559.071034	816.670273	95	0.31912763	83.78860209	0.032741804	2564.114948	3139.661986	1073.788593	95	0.342007706	110.1683852	0.03508925	3145.850242	Pos1to6	PIPIIITDTEIS
157	250	13	830.146597	431.2700674	39	0.519510733	69.05847968	0.083188295	690.6725822	1036.25876	550.4465789	39	0.531186418	88.14199444	0.0850579	862.1555715	Pos1to6	PIQIIITDTEIS
158	250	14	160.5774175	137.0878264	46	0.853717967	20.21249729	0.125873847	110.48977	187.2549898	160.766441	46	0.858542894	23.70371854	0.126585244	128.8460176	Pos1to6	PIYIIITDTEIS
159	250	15	204.5158519	173.1707777	53	0.846735234	23.78683569	0.116308029	162.5384375	245.3806794	209.11586	53	0.852209964	28.72427246	0.117060041	195.0156521	Pos1to6	PIVIIITDTEIS
160	250	16	228.3638639	173.4704132	75	0.759622868	20.03063795	0.087713693	173.9078557	263.7046424	201.6247811	75	0.764585634	23.28162433	0.088286744	200.8212163	Pos1to6	PIIIIITDTEIS
161	250	17	1635.662208	762.9034825	60	0.466418726	98.49041609	0.060214399	1472.457403	1898.811151	904.5894556	60	0.4763978	116.7819966	0.061502692	1709.349597	Pos1to6	PIKIIITDTEIS
162	250	18	503.1758528	327.4399373	49	0.650746524	46.7771339	0.092963789	379.39821	565.2822251	371.0285338	49	0.65635981	53.00407625	0.093765687	426.2268611	Pos1to6	PISIIITDTEIS
163	250	19	373.2523909	136.2518426	37	0.365039437	22.39966494	0.060012114	369.1498877	414.3760678	153.349806	37	0.370073993	25.21055281	0.06083979	409.8215648	Pos1to6	PIGIIITDTEIS
164	250	20	276.3030501	144.5266098	32	0.523072799	25.54893647	0.092467081	240.9514844	320.9794798	170.0404585	32	0.52975492	30.05919033	0.093648324	279.9117929	Pos1to6	PIAFIITDTEIS
165	250	21	131.5985725	66.14597096	80	0.502634411	7.395344375	0.056196236	121.6166373	153.3422102	78.23860485	80	0.510222233	8.747341946	0.05704458	141.7109897	Pos1to6	PIAYIITDTEIS
166	250	22	181.9850114	135.388367	60	0.743953395	17.47856302	0.09604397	152.7504851	197.5722476	147.6189699	60	0.747164502	19.05752707	0.096458522	165.8337488	Pos1to6	PIALIITDTEIS
167	250	23	299.994912	151.213369	61	0.504053112	19.36088797	0.064537388	269.5502705	367.9664194	189.6952305	61	0.515523212	24.28798546	0.066005984	330.623767	Pos1to6	PIAAIITDTEIS
168	250	24	339.2565244	133.7368586	22	0.394205709	28.51279406	0.084044939	290.1535091	373.4742019	151.9682258	22	0.406904212	32.3997346	0.086752269	319.4186183	Pos1to6	PIAVIITDTEIS
169	250	25	140.0367106	87.33179613	68	0.623635015	10.59053588	0.075626854	117.9115278	191.1343441	122.5944487	68	0.641404606	14.86676062	0.077781734	160.9359605	Pos1to6	PIAGIITDTEIS
170	250	26	345.503436	168.9203833	47	0.488910864	24.63957027	0.071314979	343.4199389	458.8734627	231.5965884	47	0.504706868	33.78183439	0.073619063	456.1063077	Pos1to6	PIAIHITDTEIS
171	250	27	265.4263908	134.7487401	92	0.507668961	14.0485273	0.052928148	247.5787813	306.4506246	158.2823471	92	0.516501956	16.50207543	0.053849051	285.8444932	Pos1to6	PIAIYITDTEIS
172	250	28	254.1446656	182.9689815	46	0.719940279	26.97730454	0.106149403	256.2524773	303.7481026	220.1853263	46	0.724894491	32.46455523	0.106879862	306.2673127	Pos1to6	PIAIFITDTEIS
173	250	29	372.5522167	208.5557259	54	0.559802671	28.38083952	0.076179494	327.505759	412.6545649	233.0234283	54	0.564693688	31.71047207	0.076845078	362.7592063	Pos1to6	PIAIQITDTEIS
174	250	30	217.9001546	208.6414598	57	0.957509462	27.63523645	0.126825226	168.5898346	291.6280905	281.0095716	57	0.963588834	37.22062703	0.127630459	225.6333027	Pos1to6	PIAIEITDTEIS
175	250	31	304.4219105	212.9720646	31	0.699595059	38.25091198	0.125650982	227.9528696	347.7142866	244.2457162	31	0.702432214	43.86782563	0.12616055	260.3704487	Pos1to6	PIAILITDTEIS
176	250	32	756.7932974	381.5746339	38	0.504199278	61.89957938	0.081791923	646.3747242	926.8425959	478.201618	38	0.515946958	77.57454606	0.083697649	791.6132838	Pos1to6	PIAIIITDTEIS
177	250	33	-19.44452183	67.91119315	71	-3.492561747	8.059575842	-0.414490822	-37.29063762	-24.23393855	84.70788155	71	-3.495423633	10.05297601	-0.414830466	-46.47576467	Pos1to6	SCRAMBLED
178	250	34	268.788072	94.73785523	50	0.352463019	13.39795597	0.049845798	266.3790821	324.7320271	119.2013027	50	0.367075905	16.85760989	0.051912372	321.8216443	Pos1to6	PIAIAITDTEIS
179	250	35	164.7482305	166.2369348	28	1.009036238	31.41582772	0.190689925	115.7949876	187.4744046	190.2052644	28	1.014566574	35.94541625	0.19173506	131.7683127	Pos1to6	PIAIIDTDTEIS
180	250	36	183.039695	136.076284	48	0.743424993	19.6409198	0.107304155	131.5723818	204.1938997	152.3228888	48	0.74597179	21.98591521	0.107671753	146.7784228	Pos1to6	PIAIIFTDTEIS
181	250	37	201.0150646	89.29115721	42	0.444201321	13.77792468	0.068541752	184.4490395	224.7541141	101.5825826	42	0.451972072	15.6745328	0.069740805	206.2317098	Pos1to6	PIAIIHTDTEIS
182	250	38	172.2297015	124.5864507	87	0.723373783	13.35706955	0.07755381	140.342441	221.5126801	162.7086039	87	0.73453404	17.44419337	0.078750315	180.500982	Pos1to6	PIAIILTDTEIS
183	250	39	242.9364418	89.05836825	92	0.366591227	9.284976737	0.038219777	232.2724815	280.8927847	106.1630479	92	0.377948647	11.06826286	0.03940387	268.5626893	Pos1to6	PIAIIRTDTEIS
184	250	40	246.9170422	140.2893314	15	0.568163826	36.2225496	0.146699269	244.2171224	282.9665677	162.3102129	15	0.573602084	41.90831678	0.148103421	279.8724635	Pos1to6	PIAIISTDTEIS
185	250	41	336.4853716	254.2361188	43	0.75556366	38.77064465	0.115222378	299.4199329	389.8381769	297.1578026	43	0.762259369	45.31614006	0.116243464	346.8956769	Pos1to6	PIAIIQTDTEIS
186	250	42	287.4706578	142.8417085	21	0.496891438	31.17061626	0.108430601	238.1359194	322.3922069	161.4930949	21	0.500921212	35.24068245	0.10930997	267.0643508	Pos1to6	PIAIIATDTEIS
187	250	43	282.2966521	130.3873123	32	0.461880477	23.04943817	0.081649704	270.0504541	357.929785	173.3283175	32	0.484252288	30.64040716	0.085604519	342.4025763	Pos1to6	PIAIIGTDTEIS
188	250	44	98.52498202	122.3608119	23	1.241926762	25.513993	0.258959631	73.72592273	109.9174225	136.669131	23	1.243380056	28.49748377	0.259262664	82.25084881	Pos1to6	PIAIIYTDTEIS
189	250	45	550.3422325	193.8754408	30	0.352281597	35.39665075	0.064317526	557.1873243	638.7937157	235.2239339	30	0.368231447	42.94581823	0.067229557	646.7389566	Pos1to6	PIAIIIEDTEIS
190	250	46	229.7792	133.1118295	27	0.579303216	25.61738354	0.111486956	186.4816523	249.8192083	146.1929353	27	0.585194935	28.13484353	0.112620818	202.7454998	Pos1to6	PIAIIIQDTEIS
191	250	47	301.1917403	198.460998	39	0.658919125	31.77919322	0.105511503	243.6329024	362.3774862	240.249053	39	0.662980075	38.47063732	0.106161775	293.1258296	Pos1to6	PIAIIIRDTEIS
192	250	48	94.70890878	57.87612836	54	0.611094871	7.875943487	0.083159479	90.36121038	108.5002087	66.96962037	54	0.617230337	9.113411009	0.08399441	103.5194081	Pos1to6	PIAIIIIDTEIS
193	500	1	267.5830036	136.5145233	51	0.510176362	19.11585682	0.07143898	254.3154558	328.9834125	173.4607456	51	0.527262892	24.28936274	0.073831573	312.6714529	Pos1to6	PEAIIITDTEIS
194	500	2	640.1242666	186.2543924	59	0.290965992	24.24825651	0.037880546	665.1032123	809.3955301	251.4500478	59	0.310663994	32.73600789	0.040445007	840.9797835	Pos1to6	PFAIIITDTEIS
195	500	3	969.0974225	279.5614587	44	0.288476114	42.14547565	0.043489411	973.753504	1157.191089	344.9509045	44	0.298093295	52.00330551	0.044939255	1162.750877	Pos1to6	PHAIIITDTEIS
196	500	4	774.944214	275.1703784	58	0.355084112	36.13164082	0.046624828	746.5685044	946.3488647	353.6186832	58	0.373666305	46.43240788	0.04906479	911.6969245	Pos1to6	PQAIIITDTEIS
197	500	5	640.4509551	269.7444118	72	0.421178874	31.7896838	0.049636406	590.4609043	778.2846786	337.1034443	72	0.433136426	39.72802191	0.051045617	717.5360915	Pos1to6	PYAIIITDTEIS
198	500	6	533.9741543	197.0060048	34	0.36894296	33.78625109	0.063273196	525.7408318	647.6752809	251.2849669	34	0.387979863	43.09501629	0.066537998	637.688806	Pos1to6	PAAIIITDTEIS
199	500	7	483.8002144	162.4846232	64	0.335850664	20.3105779	0.041981333	477.9512863	592.7735445	212.1110221	64	0.357828085	26.51387776	0.044728511	585.6071776	Pos1to6	PGAIIITDTEIS
200	500	8	472.3920417	195.1801792	76	0.413174148	22.38870202	0.047394325	449.1189151	590.5886974	252.3134971	76	0.427223715	28.94234306	0.049005921	561.4924293	Pos1to6	PRAIIITDTEIS
201	500	9	12678.91405	2513.059658	15	0.1982078	648.8692137	0.051177034	12381.12514	15828.29253	3539.60589	15	0.223625251	913.9223109	0.057739792	15456.53435	Pos1to6	PPAIIITDTEIS
202	500	10	24451.15303	5633.27317	60	0.230388856	727.2524391	0.029743073	24911.9513	32073.49875	8118.61407	60	0.253125302	1048.10857	0.032678336	32677.94521	Pos1to6	PPKIIITDTEIS
203	500	11	432.3745563	574.6436398	78	1.329041294	65.06557961	0.150484293	328.2601004	488.8235033	650.8734625	78	1.331510163	73.69690737	0.150763838	371.1163156	Pos1to6	PIFIIITDTEIS
204	500	12	4469.125323	1425.343345	71	0.318931165	169.1571338	0.037850166	4581.118091	5483.061121	1874.244032	71	0.341824392	222.4318441	0.040567092	5620.462323	Pos1to6	PIPIIITDTEIS
205	500	13	1805.762375	915.0970137	41	0.506764913	142.9141431	0.079143383	1730.363845	2254.10438	1169.266075	41	0.518727564	182.6086815	0.081011635	2159.985597	Pos1to6	PIQIIITDTEIS
206	500	14	435.4511769	286.8992391	43	0.658855124	43.75172379	0.100474464	358.6987962	507.794975	337.731994	43	0.665095187	51.50364625	0.101426065	418.2913169	Pos1to6	PIYIIITDTEIS
207	500	15	569.1811503	367.6586029	56	0.645943041	49.13044741	0.08631777	408.3449926	682.9106698	446.0110851	56	0.653103114	59.60073825	0.087274575	489.9374343	Pos1to6	PIVIIITDTEIS
208	500	16	520.2121578	267.268008	46	0.513767324	39.40651792	0.075750859	468.0462601	600.7183391	313.0204598	46	0.521076916	46.1523489	0.0768286	540.4794328	Pos1to6	PIIIIITDTEIS
209	500	17	3330.378049	1430.529989	59	0.429539821	186.2391415	0.055921321	3272.376814	3866.176614	1702.491818	59	0.440355418	221.6455558	0.057329392	3798.844012	Pos1to6	PIKIIITDTEIS
210	500	18	948.7516837	526.5383226	40	0.554980119	83.25301874	0.087750062	784.5842538	1065.854929	598.5324406	40	0.561551506	94.63628829	0.088789089	881.4245165	Pos1to6	PISIIITDTEIS
211	500	19	748.5479743	278.8559377	31	0.372529146	50.08400491	0.06690821	722.030053	831.0204401	313.6801488	31	0.377463819	56.33861787	0.067794503	801.5808646	Pos1to6	PIGIIITDTEIS
212	500	20	580.7334192	283.2226401	42	0.487698195	43.70220215	0.075253465	513.0176462	674.6342856	333.8483167	42	0.494858213	51.51391365	0.07635828	595.9693067	Pos1to6	PIAFIITDTEIS
213	500	21	210.864521	93.53479068	71	0.443577659	11.1005374	0.052642983	207.36835	245.7050337	111.0974039	71	0.452157623	13.18483613	0.053661237	241.6312009	Pos1to6	PIAYIITDTEIS
214	500	22	445.5834191	166.5940798	50	0.373878544	23.55996071	0.052874411	419.5085484	483.7481776	183.9345844	50	0.380227963	26.01227838	0.053772354	455.4399627	Pos1to6	PIALIITDTEIS
215	500	23	609.3441128	236.3134294	68	0.387816054	28.65721265	0.047029605	553.2055864	747.4065804	300.9144052	68	0.402611394	36.49123168	0.048823803	678.5484375	Pos1to6	PIAAIITDTEIS
216	500	24	641.4833041	235.1139536	21	0.366516092	51.30607092	0.079980368	668.9220214	706.1838103	268.4491993	21	0.380140688	58.58041791	0.082953499	736.390018	Pos1to6	PIAVIITDTEIS
217	500	25	375.9200362	174.5884782	56	0.464429829	23.33036676	0.062062046	334.4869568	513.0885267	250.4031313	56	0.488031048	33.46152593	0.065215892	456.537038	Pos1to6	PIAGIITDTEIS
218	500	26	830.0552524	238.1441686	50	0.286901586	33.6786713	0.040574011	783.3251057	1102.421244	345.1260146	50	0.313061832	48.80818906	0.044273629	1040.357537	Pos1to6	PIAIHITDTEIS
219	500	27	649.8172045	290.5867926	74	0.447182362	33.78002849	0.051983894	643.8842646	750.2527824	343.0046772	74	0.457185478	39.87348381	0.053146732	743.4028488	Pos1to6	PIAIYITDTEIS
220	500	28	575.5940574	184.1203066	46	0.319878748	27.14705817	0.047163548	575.3132363	687.9373304	227.6235162	46	0.330878274	33.56125649	0.04878534	687.6016992	Pos1to6	PIAIFITDTEIS
221	500	29	613.1630803	319.9030081	44	0.521725815	48.22719305	0.078653126	539.4869653	679.1653162	357.8999898	44	0.526970358	53.95545357	0.079443771	597.5585405	Pos1to6	PIAIQITDTEIS
222	500	30	414.1596041	188.893117	54	0.456087738	25.70509737	0.06206568	392.6919333	554.2932024	259.8063335	54	0.468716435	35.35516384	0.063784228	525.5618054	Pos1to6	PIAIEITDTEIS
223	500	31	720.3686561	226.4476686	30	0.314349697	41.34349873	0.05739214	693.8295118	822.8135514	263.8057534	30	0.320614255	48.16412065	0.058535886	792.5002286	Pos1to6	PIAILITDTEIS
224	500	32	1634.456819	520.8917575	34	0.318694108	89.33219942	0.054655589	1577.440807	2001.714612	674.5222435	34	0.336972234	115.6796104	0.057790261	1931.887264	Pos1to6	PIAIIITDTEIS
225	500	33	55.88030923	93.86398546	86	1.679732749	10.12161386	0.181130241	28.78892562	69.64429323	117.3976589	86	1.685675214	12.65931512	0.181771033	35.87998	Pos1to6	SCRAMBLED
226	500	34	539.8725766	200.0326414	31	0.370518248	35.92692297	0.066547042	518.9415974	652.2384526	250.7501129	31	0.384445461	45.03604975	0.069048443	626.9510236	Pos1to6	PIAIAITDTEIS
227	500	35	346.9597994	189.8902789	25	0.547297639	37.97805578	0.109459528	358.4496333	394.8211258	220.0843265	25	0.557427939	44.01686529	0.111485588	407.8959233	Pos1to6	PIAIIDTDTEIS
228	500	36	374.4451045	202.5020509	61	0.540805711	25.92773078	0.069243076	317.1801583	417.7203537	227.3657706	61	0.544301393	29.11120387	0.069690652	353.8372015	Pos1to6	PIAIIFTDTEIS
229	500	37	384.7762041	152.0952295	65	0.395282317	18.86509143	0.049028737	368.8172553	430.2166857	173.8054382	65	0.403995112	21.5579114	0.050109427	412.373051	Pos1to6	PIAIIHTDTEIS
230	500	38	453.2776722	459.3048375	94	1.01329685	47.37367679	0.10451359	377.0962046	582.9816293	595.3955541	94	1.021293852	61.41036244	0.105338418	485.0010782	Pos1to6	PIAIILTDTEIS
231	500	39	470.8432447	155.0991344	74	0.329407156	18.02990814	0.038292804	446.7895779	544.4077026	186.1883311	74	0.342001647	21.64395385	0.039756884	516.5958956	Pos1to6	PIAIIRTDTEIS
232	500	40	448.4575221	230.8619696	21	0.514791164	50.37821195	0.112336642	363.4110742	513.9316615	267.6489582	21	0.520787058	58.40579098	0.113645053	416.4685571	Pos1to6	PIAIISTDTEIS
233	500	41	570.2179159	163.789225	30	0.287239703	29.9036844	0.052442555	551.3069516	660.6311344	201.1071731	30	0.304416735	36.71697839	0.055578638	638.7216653	Pos1to6	PIAIIQTDTEIS
234	500	42	492.7472514	163.6932701	23	0.332205344	34.1324063	0.069269603	502.4019272	552.6055251	186.8929123	23	0.338203119	38.9698661	0.070520225	563.433038	Pos1to6	PIAIIATDTEIS
235	500	43	568.1204346	237.4750971	39	0.41800133	38.02644887	0.066933781	502.1960208	720.3316918	318.8164108	39	0.442596674	51.05148326	0.070872188	636.7447591	Pos1to6	PIAIIGTDTEIS
236	500	44	213.3232433	157.7895754	33	0.739673619	27.46763942	0.12876065	170.5908049	237.9898031	176.6148842	33	0.74211114	30.74470504	0.129184968	190.3162143	Pos1to6	PIAIIYTDTEIS
237	500	45	1234.841453	359.0983575	23	0.290805234	74.87718359	0.060637083	1284.115872	1433.306248	444.231897	23	0.309935087	92.6287537	0.064625933	1490.500094	Pos1to6	PIAIIIEDTEIS
238	500	46	475.0376016	294.4169832	19	0.619776165	67.54388826	0.142186404	390.6705316	516.4676243	322.9403092	19	0.625286647	74.08758803	0.143450595	424.7425481	Pos1to6	PIAIIIQDTEIS
239	500	47	581.7824209	282.8322438	33	0.4861478	49.23477403	0.084627469	507.1762559	699.9689002	344.1312578	33	0.491637925	59.90556271	0.085583178	610.2068287	Pos1to6	PIAIIIRDTEIS
240	500	48	328.2787852	216.7450293	40	0.660246836	34.2703982	0.104394191	270.0105406	376.0820091	250.444142	40	0.6659296	39.59869577	0.105292715	309.3288728	Pos1to6	PIAIIIIDTEIS
241	63	1	-48.62422049	27.34404038	59	-0.562354319	3.559890839	-0.073212296	-48.2323028	-59.78168185	34.54784463	59	-0.577900179	4.49774627	-0.075236195	-59.29983353	Pos1to6	PEAIIITDTEIS
242	63	2	-10.50643522	33.88135244	50	-3.224819049	4.791546814	-0.456058284	-2.95268998	-13.28470447	42.86517111	50	-3.226655979	6.062050634	-0.456318065	-3.733484569	Pos1to6	PFAIIITDTEIS
243	63	3	50.8249754	63.39666624	45	1.24735262	9.450617018	0.18594435	42.50098398	60.68967604	75.8385366	45	1.249611821	11.30534154	0.186281132	50.75006783	Pos1to6	PHAIIITDTEIS
244	63	4	63.87839246	50.56866462	92	0.791639593	5.272147736	0.082534133	57.21000268	78.00722051	62.41723392	92	0.800146878	6.507446479	0.083421079	69.86389486	Pos1to6	PQAIIITDTEIS
245	63	5	-0.826608497	41.61076311	76	-50.33914275	4.773081878	-5.774295688	1.616976764	-1.004505845	50.56606507	76	-50.33924422	5.800325464	-5.774307327	1.964972073	Pos1to6	PYAIIITDTEIS
246	63	6	11.41378226	39.79068644	49	3.486196384	5.684383777	0.498028055	4.828593642	13.84416188	48.29206958	49	3.488262418	6.898867083	0.498323203	5.856764261	Pos1to6	PAAIIITDTEIS
247	63	7	-3.543523025	45.74737787	89	-12.91013987	4.849212356	-1.368472089	-11.21279814	-4.341682044	56.05428587	89	-12.91073029	5.941742419	-1.368534674	-13.73841908	Pos1to6	PGAIIITDTEIS
248	63	8	-0.664835649	43.84652192	85	-65.95091883	4.755823037	-7.153381508	-4.003215318	-0.831183393	54.81738287	85	-65.95100835	5.945779981	-7.153391217	-5.004855102	Pos1to6	PRAIIITDTEIS
249	63	9	2287.363002	761.7141765	28	0.333009748	143.9504487	0.062932927	2366.646796	2855.532466	995.8294898	28	0.348736882	188.1940842	0.065905076	2954.509955	Pos1to6	PPAIIITDTEIS
250	63	10	6552.173126	2082.559152	83	0.31784251	228.5905642	0.034887748	6496.214528	8594.732378	2876.569167	83	0.334689789	315.7444859	0.036736977	8521.329376	Pos1to6	PPKIIITDTEIS
251	63	11	-42.77390139	42.69213913	101	-0.998088501	4.248026617	-0.099313518	-48.59876663	-48.35827646	48.42470434	101	-1.001373661	4.818438174	-0.099640403	-54.94361084	Pos1to6	PIFIIITDTEIS
252	63	12	429.6593581	201.1557901	108	0.468175047	19.35622493	0.045050165	404.1825954	527.1386125	255.1670531	108	0.484060638	24.55346113	0.046578757	495.8817921	Pos1to6	PIPIIITDTEIS
253	63	13	103.4034974	122.3108207	47	1.18284994	17.84086682	0.172536396	57.33654322	129.076937	153.3465297	47	1.188024238	22.36789025	0.173291145	71.57229267	Pos1to6	PIQIIITDTEIS
254	63	14	-27.51127456	63.03307656	38	-2.291172531	10.22531526	-0.371677264	-40.56158142	-32.08186754	73.56291147	38	-2.292974727	11.93348004	-0.371969619	-47.30029063	Pos1to6	PIYIIITDTEIS
255	63	15	-11.63436701	72.52398017	55	-6.233599139	9.779131492	-0.840538336	-25.58514928	-13.95905919	87.02559302	55	-6.234345153	11.73452857	-0.840638929	-30.69738241	Pos1to6	PIVIIITDTEIS
256	63	16	10.58578731	78.62155807	41	7.427086504	12.27862449	1.159916039	-7.085672665	12.22400606	90.79497516	41	7.427595724	14.17979283	1.159995566	-8.182226138	Pos1to6	PIIIIITDTEIS
257	63	17	283.5058773	161.162018	65	0.568460942	19.98968812	0.070508902	242.9486462	329.1169281	189.7941389	65	0.576676927	23.54106564	0.07152797	282.0347602	Pos1to6	PIKIIITDTEIS
258	63	18	41.27348913	77.27811324	48	1.872342631	11.15413487	0.270249381	16.46429308	46.36782477	86.90725851	48	1.874300961	12.54398227	0.270532041	18.49646038	Pos1to6	PISIIITDTEIS
259	63	19	47.41941232	80.64941516	40	1.700767918	12.75179219	0.26891502	18.48606846	52.64392162	89.59235279	40	1.701855599	14.16579479	0.269086997	20.5228005	Pos1to6	PIGIIITDTEIS
260	63	20	16.22103258	56.9345917	59	3.509924009	7.41225249	0.456953184	6.604100282	18.84386943	66.15943191	59	3.510926042	8.613224391	0.457083638	7.671940908	Pos1to6	PIAFIITDTEIS
261	63	21	-27.73396195	29.00584165	90	-1.045860008	3.057484169	-0.110243325	-27.88006494	-32.31636134	33.91691852	90	-1.049527766	3.575157124	-0.11062994	-32.4866045	Pos1to6	PIAYIITDTEIS
262	63	22	-17.36274747	36.6358632	44	-2.110026841	5.523064187	-0.318098515	-20.99942408	-18.84988778	39.7951508	44	-2.111161152	5.999344713	-0.318269519	-22.79805014	Pos1to6	PIALIITDTEIS
263	63	23	41.56756528	68.07579371	76	1.637714243	7.808829087	0.187858707	32.66821744	50.98575857	83.68194539	76	1.641280776	9.598977457	0.188267817	40.07003625	Pos1to6	PIAAIITDTEIS
264	63	24	78.55439995	86.83271915	23	1.105383266	18.10587356	0.230488344	62.49658908	86.47745798	95.98783824	23	1.109975252	20.01484785	0.231445839	68.80004378	Pos1to6	PIAVIITDTEIS
265	63	25	-9.446516315	58.45446656	75	-6.187938983	6.749740401	-0.714521648	-18.22483835	-12.89343124	79.80718167	75	-6.189755092	9.215339564	-0.714731354	-24.87485252	Pos1to6	PIAGIITDTEIS
266	63	26	28.14357194	45.31865817	70	1.610266751	5.416615678	0.192463689	33.82568065	37.37832092	60.3709549	70	1.615132874	7.215709247	0.193045302	44.9248997	Pos1to6	PIAIHITDTEIS
267	63	27	-9.557350679	40.94913985	86	-4.284570193	4.41565931	-0.462017086	-15.11647631	-11.03453231	47.28987603	86	-4.28562577	5.099398476	-0.462130912	-17.45287496	Pos1to6	PIAIYITDTEIS
268	63	28	-17.67460181	45.6409506	44	-2.582290174	6.880632191	-0.389294891	-13.26814346	-21.12429451	54.57832821	44	-2.583675785	8.227992561	-0.38950378	-15.85779261	Pos1to6	PIAIFITDTEIS
269	63	29	43.87483603	60.00722069	59	1.367691053	7.812274713	0.178058209	28.55551734	48.59762083	66.56417293	59	1.36970024	8.665917185	0.178319783	31.62929665	Pos1to6	PIAIQITDTEIS
270	63	30	-22.42311739	33.84757123	61	-1.509494449	4.333737414	-0.19327096	-24.05426829	-30.01012513	45.41606422	61	-1.513358042	5.814931162	-0.193765642	-32.19318657	Pos1to6	PIAIEITDTEIS
271	63	31	2.054474942	41.34086688	31	20.12235148	7.425038882	3.614081015	-12.96416982	2.346645441	47.22025631	31	20.12245032	8.481008397	3.614098767	-14.80782725	Pos1to6	PIAILITDTEIS
272	63	32	99.08573297	103.0002854	44	1.039506722	15.52787728	0.156711535	80.13589756	121.350015	126.8417425	44	1.045255268	19.12211216	0.157578161	98.14220551	Pos1to6	PIAIIITDTEIS
273	63	33	-90.8487339	32.74723846	102	-0.360458941	3.24245977	-0.035690754	-97.2281849	-113.2258563	43.84187408	102	-0.387207264	4.34099239	-0.038339232	-121.1766419	Pos1to6	SCRAMBLED
274	63	34	19.48145549	47.91136406	53	2.459331854	6.581131987	0.33781521	8.660212009	23.53621009	57.9336423	53	2.461468608	7.957797778	0.338108716	10.46269717	Pos1to6	PIAIAITDTEIS
275	63	35	-20.25955155	38.41455826	36	-1.896120858	6.402426377	-0.316020143	-25.60109621	-23.05425287	43.78163176	36	-1.899069643	7.296938627	-0.316511607	-29.13263624	Pos1to6	PIAIIDTDTEIS
276	63	36	-25.45196799	40.37854751	59	-1.586460722	5.256839128	-0.206539594	-34.76142834	-28.39349465	45.07909532	59	-1.58765576	5.868798328	-0.206695174	-38.77886496	Pos1to6	PIAIIFTDTEIS
277	63	37	-12.11474174	47.35036739	54	-3.908491689	6.443568847	-0.53187835	-17.46056076	-13.54544274	52.95431626	54	-3.909382461	7.206169695	-0.531999569	-19.52258092	Pos1to6	PIAIIHTDTEIS
278	63	38	4.630703053	141.9114916	126	30.64577667	12.6424805	2.730142777	-29.58853738	5.955763931	182.5205924	126	30.64604213	16.26022673	2.730166427	-38.05520277	Pos1to6	PIAIILTDTEIS
279	63	39	17.24905772	37.87624353	119	2.19584421	3.472109552	0.201292709	18.06858009	19.94404718	43.83240532	119	2.197768834	4.018110008	0.201469139	20.89161156	Pos1to6	PIAIIRTDTEIS
280	63	40	2.249696297	52.15463981	28	23.18296913	9.856300475	4.381169355	-7.886606776	2.578148651	59.76948585	28	23.18310305	11.29537111	4.381194663	-9.038039778	Pos1to6	PIAIISTDTEIS
281	63	41	49.07528185	57.68920782	42	1.175524738	8.901638023	0.181387405	39.53760151	56.85661255	67.08167889	42	1.179839527	10.35092777	0.182053192	45.80664656	Pos1to6	PIAIIQTDTEIS
282	63	42	57.66431389	58.93076174	28	1.021962419	11.13686715	0.193132744	42.25926386	64.66929723	66.21669144	28	1.023927803	12.51377844	0.193504166	47.39286243	Pos1to6	PIAIIATDTEIS
283	63	43	1.084523704	62.65923773	39	57.77581211	10.03350806	9.251534128	9.570257719	1.375090116	79.44720005	39	57.77599529	12.72173347	9.25156346	12.13432842	Pos1to6	PIAIIGTDTEIS
284	63	44	-41.42429492	39.98683739	41	-0.965299167	6.244894822	-0.150754402	-49.76045022	-46.21418481	44.69689083	41	-0.967168219	6.980481585	-0.151046299	-55.51424948	Pos1to6	PIAIIYTDTEIS
285	63	45	87.06606887	63.57758696	34	0.730222322	10.90346621	0.125232095	73.8485464	101.0594033	74.58681808	34	0.738049262	12.79153377	0.126574404	85.71754913	Pos1to6	PIAIIIEDTEIS
286	63	46	-14.30577749	36.38490871	31	-2.543371637	6.534922517	-0.456803031	-20.39569815	-15.55344438	39.57916189	31	-2.544720059	7.108627326	-0.457045215	-22.17449258	Pos1to6	PIAIIIQDTEIS
287	63	47	32.05513546	39.39306805	38	1.228915975	6.390399481	0.199356496	32.96683062	38.5669919	47.47975215	38	1.231098144	7.702232868	0.19971049	39.66389383	Pos1to6	PIAIIIRDTEIS
288	63	48	-41.4522015	37.06545781	50	-0.894173445	5.241847312	-0.126455221	-45.57880452	-47.48837855	42.66250044	50	-0.898377703	6.033388673	-0.127049793	-52.21588829	Pos1to6	PIAIIIIDTEIS
