# Supplementary material for: Quantitative mapping of protein-peptide affinity landscapes using spectrally encoded beads
Source: eLife journal article supplement (doi:10.7554/elife.40499), 2019-07-08
Supplement: supp [file elife-40499-supp-v1.zip › elife_poa_e40499_Figure_3_source_data_8.csv]

	conc	code	AVG	SD	N	CV	SEM	RSEM	MED	AVG_NORM	SD_NORM	N_NORM	CV_NORM	SEM_NORM	RSEM_NORM	MED_NORM	library	sequence
1	1000	1	1853.068557	1004.892785	92	0.542285811	104.7673152	0.056537204	2036.285648	2203.194834	1217.668842	92	0.552683232	126.9507526	0.05762121	2421.029704	Flank	PIAIIITDTEIS
2	1000	2	273.9604819	295.2467193	105	1.077698204	28.81312949	0.105172576	247.0616604	339.0502564	368.7449277	105	1.087581917	35.98582018	0.106137127	305.7605927	Flank	SCRAMBLED
3	1000	3	851.9955797	452.0781657	134	0.530610929	39.05360532	0.045837803	746.3791163	1064.257561	581.5246518	134	0.546413456	50.23607854	0.047202933	932.3283325	Flank	HIAIIITDTEIS
4	1000	4	1184.21495	510.8767203	109	0.431405397	48.93311513	0.041321143	1158.083299	1399.635883	622.062303	109	0.444445809	59.58276248	0.042570188	1368.750614	Flank	LIAIIITDTEIS
5	1000	5	800.5248008	458.2659994	93	0.572456967	47.51997047	0.059361022	735.0248361	946.1184532	547.2079032	93	0.578371452	56.74281626	0.059974326	868.7058293	Flank	RIAIIITDTEIS
6	1000	6	644.2093911	418.0268306	127	0.648899001	37.09388293	0.057580475	661.4827305	738.2221326	482.2849637	127	0.653306021	42.7958702	0.057971535	758.0162579	Flank	YIAIIITDTEIS
7	1000	7	808.0820014	356.9736341	75	0.44175422	41.21976475	0.051009384	764.8874139	1006.023993	457.2345211	75	0.454496637	52.79689476	0.052480751	952.248768	Flank	AIAIIITDTEIS
8	1000	8	637.9929117	351.4337097	121	0.550842656	31.94851907	0.050076605	617.023445	762.6006576	430.0141948	121	0.563878605	39.09219953	0.051261691	737.5356	Flank	NIAIIITDTEIS
9	1000	9	1161.597318	416.0693191	13	0.358187224	115.3968665	0.099343262	1033.26427	1267.704944	458.7893219	13	0.361905445	127.2452635	0.100374511	1127.649146	Flank	TIAIIITDTEIS
10	1000	10	2056.53772	944.0410529	66	0.459043879	116.2034208	0.056504396	2195.315654	2451.863794	1146.065104	66	0.467426089	141.0708624	0.057536174	2617.318865	Flank	PIAIIITQTEIS
11	1000	11	896.81941	375.4921947	81	0.418693207	41.72135496	0.046521467	851.8935936	1076.409807	474.1209134	81	0.440465063	52.68010149	0.048940563	1022.48748	Flank	PIAIIITETEIS
12	1000	12	1521.728043	467.8215212	84	0.307427811	51.04351268	0.033543124	1443.53359	1817.822943	587.8007882	84	0.323354258	64.13432394	0.035280842	1724.413564	Flank	PIAIIITFTEIS
13	1000	13	1560.041871	633.3840579	146	0.406004525	52.4192376	0.033601174	1484.793509	1856.343846	768.191429	146	0.413819579	63.57597502	0.034247952	1766.803407	Flank	PIAIIITYTEIS
14	1000	14	9050.910334	4231.465905	146	0.467518266	350.19861	0.038692087	9401.067203	10511.24099	4999.775184	146	0.475659838	413.7843384	0.039365888	10917.89436	Flank	PIAIIITRTEIS
15	1000	15	1134.657111	625.0237664	132	0.550848146	54.40133608	0.047945177	1071.631006	1440.003386	805.2611485	132	0.559207816	70.08898658	0.048672793	1360.016397	Flank	PIAIIITLTEIS
16	1000	16	2984.19813	1023.409324	124	0.342942821	91.90487037	0.030797174	3073.123307	3811.844961	1344.204619	124	0.352638849	120.7131383	0.031667903	3925.432924	Flank	PIAIIITHTEIS
17	1000	17	620.0840711	455.6557717	122	0.734829022	41.25313523	0.066528294	532.6572825	753.805965	559.5489019	122	0.742298321	50.65917728	0.067204532	647.5254817	Flank	PIAIIITATEIS
18	1000	18	400.4555949	388.3807593	57	0.969847255	51.44228826	0.128459407	350.7527304	492.6353717	480.3091422	57	0.974979	63.61850002	0.129139123	431.4915409	Flank	PIAIIITGTEIS
19	1000	19	5708.28827	3424.540133	131	0.599924175	299.2034607	0.052415619	5622.799745	6576.195891	3995.463359	131	0.607564529	349.0852545	0.053083159	6477.709398	Flank	PIAIIITKTEIS
20	1000	20	2010.49556	921.834752	114	0.45851121	86.33773493	0.042943509	1908.189973	2521.149742	1196.204545	114	0.474467869	112.0348205	0.044437987	2392.85913	Flank	PIAIIITDDEIS
21	1000	21	1700.610901	619.9828722	67	0.364564799	75.74296301	0.044538679	1593.605453	2006.665219	755.6832721	67	0.37658662	92.32140546	0.046007378	1880.402292	Flank	PIAIIITDEEIS
22	1000	22	1791.762088	836.8901803	89	0.46707662	88.71018169	0.049510023	1581.117104	2118.082007	1012.186321	89	0.477878721	107.2915355	0.050655043	1869.073864	Flank	PIAIIITDHEIS
23	1000	23	1048.822517	581.2605065	108	0.554202925	55.93181832	0.053328201	955.9269769	1312.603418	739.294054	108	0.563227281	71.13860352	0.05419657	1196.344469	Flank	PIAIIITDYEIS
24	1000	24	927.4828694	1122.128679	91	1.209864588	117.6310479	0.12682827	693.8783405	1272.114115	1552.279724	91	1.220236223	162.7231297	0.127915513	951.7075306	Flank	PIAIIITDREIS
25	1000	25	599.6730736	308.109139	101	0.513795187	30.6580052	0.051124532	595.5082259	699.6464268	363.1667856	101	0.519071879	36.13644579	0.051649582	694.7872445	Flank	PIAIIITDVEIS
26	1000	26	1385.942905	717.679137	91	0.517827347	75.2332157	0.054283056	1200.402514	1670.116167	878.8568585	91	0.526224987	92.12923184	0.055163367	1446.532637	Flank	PIAIIITDAEIS
27	1000	27	432.6948876	222.2807673	60	0.513712488	28.69632366	0.066319997	405.0783238	553.0436395	291.9506252	60	0.527897989	37.69066365	0.068151337	517.7458687	Flank	PIAIIITDGEIS
28	1000	28	708.8355884	324.6019619	91	0.457936886	34.02753146	0.048004829	690.3825915	913.2565622	441.9966137	91	0.48397858	46.33383481	0.050734741	889.4819087	Flank	PIAIIITDPEIS
29	1000	29	627.7491969	378.2699239	119	0.602581295	34.67594707	0.055238537	550.9179078	858.2898677	532.1220268	119	0.619979388	48.77954622	0.056833417	753.2423148	Flank	PIAIIITDFEIS
30	1000	30	542.9292908	278.029885	75	0.512092255	32.10412579	0.05913132	542.5535074	703.046768	375.3211467	75	0.533849473	43.33835302	0.061643627	702.5601608	Flank	PIAIIITDQEIS
31	1000	31	995.4482974	386.8233841	82	0.38859214	42.71749663	0.042912823	1042.239657	1086.755557	428.5480079	82	0.394337075	47.32521051	0.043547245	1137.838843	Flank	PIAIIITDTHIS
32	1000	32	1455.458805	734.9743359	113	0.504977766	69.14056955	0.047504312	1501.73718	1686.897597	870.627079	113	0.516111399	81.90170618	0.048551676	1740.534896	Flank	PIAIIITDTLIS
33	1000	33	1666.545912	462.0311826	68	0.277238796	56.02951083	0.033620142	1601.667718	1984.399366	581.152616	68	0.292860714	70.47510648	0.035514578	1907.147222	Flank	PIAIIITDTFIS
34	1000	34	2346.016858	732.9152395	106	0.312408343	71.18702104	0.030343781	2332.302818	2984.618931	982.8908291	106	0.329318701	95.46679665	0.03198626	2967.171834	Flank	PIAIIITDTSIS
35	1000	35	2373.70924	1086.948797	111	0.457911516	103.1686142	0.043463038	2313.680642	3232.482903	1551.349425	111	0.479925021	147.2475711	0.045552467	3150.736826	Flank	PIAIIITDTYIS
36	1000	36	867.218134	482.771894	108	0.556690266	46.45474716	0.053567546	759.6591605	1003.557123	567.0508207	108	0.565040901	54.56449066	0.054371086	879.0883531	Flank	PIAIIITDTPIS
37	1000	37	2141.215687	923.7174836	102	0.431398616	91.46165968	0.042714828	1912.963957	2531.686709	1119.709082	102	0.4422779	110.8677196	0.043792038	2261.811107	Flank	PIAIIITDTAIS
38	1000	38	1640.020473	427.845473	96	0.260878129	43.66679574	0.026625763	1642.671325	1946.555183	581.3178531	96	0.298639288	59.33050493	0.030479745	1949.701503	Flank	PIAIIITDTGIS
39	1000	39	1138.127775	588.6141141	51	0.517177532	82.42246212	0.07241934	1178.678336	1416.055549	756.7348006	51	0.534396268	105.964067	0.074830445	1466.508449	Flank	PIAIIITDTQIS
40	1000	40	4007.137482	1677.273364	83	0.418571454	184.1046696	0.045944186	4058.542098	4305.512472	1825.424422	83	0.423973786	200.3663608	0.046537169	4360.744722	Flank	PIAIIITDTDIS
41	1000	41	1675.278194	1131.456853	119	0.675384457	103.7204797	0.061912392	1835.437938	1941.920927	1322.810958	119	0.681186829	121.2618817	0.062444294	2127.572216	Flank	PIAIIITDTTIS
42	1000	42	2535.775855	960.3024291	78	0.378701622	108.7328386	0.042879515	2503.44123	3347.954718	1339.16191	78	0.399994033	151.6302276	0.045290406	3305.263696	Flank	PIAIIITDTSIS
43	1000	43	463.1283042	287.6907555	88	0.621190182	30.66793758	0.066219096	466.2306843	563.4504666	354.2338797	88	0.628686816	37.76145845	0.06701824	567.2248796	Flank	PIAIIITDTT(PO4)
44	1000	44	620.9308445	560.6922904	82	0.902986694	61.91810529	0.099718199	446.1081733	723.5487406	658.0099527	82	0.909420355	72.66504325	0.100428678	519.8340682	Flank	PIAIIITDTS(PO4)
45	1000	45	808.3319071	325.5821325	93	0.40278273	33.76129441	0.041766623	790.9109668	971.8247682	407.8917035	93	0.419717337	42.29639932	0.04352266	950.8802761	Flank	PIAIIIFDTEIS
46	1000	46	924.0884645	574.158367	91	0.621324028	60.188151	0.065132456	1051.528441	1375.548543	872.5167904	91	0.634304616	91.46461212	0.066493191	1565.248859	Flank	PIAIIISDTEIS
47	1000	47	610.3495092	440.3482741	108	0.721469039	42.37253243	0.069423391	514.8923831	694.2723798	504.091224	108	0.726071264	48.50620065	0.06986624	585.6899281	Flank	PIAIIIADTEIS
48	1000	48	844.531973	542.8414997	89	0.642771993	57.54108388	0.068133695	834.5892472	1103.529604	721.6076472	89	0.653908735	76.49025762	0.069314187	1090.537683	Flank	PIAIIIHDTEIS
49	125	1	227.2309861	216.0430362	88	0.950763978	23.03026504	0.101351781	214.1034519	270.1649287	258.4755563	88	0.956732458	27.55358688	0.101988023	254.557025	Flank	PIAIIITDTEIS
50	125	2	-43.98533258	43.95146544	111	-0.999230036	4.171688485	-0.094842718	-34.41841387	-54.43572805	54.97366237	111	-1.009882008	5.217869119	-0.095853758	-42.59582246	Flank	SCRAMBLED
51	125	3	82.14513319	156.8330127	123	1.909218557	14.14115652	0.17214844	34.33098831	102.610367	196.3624437	123	1.913670611	17.70540529	0.172549868	42.88404161	Flank	HIAIIITDTEIS
52	125	4	137.5998486	87.83168452	108	0.638312363	8.451607784	0.061421636	135.8354717	162.6306825	105.2541121	108	0.647197137	10.12808166	0.062276574	160.5453472	Flank	LIAIIITDTEIS
53	125	5	116.384828	89.9689452	91	0.773029842	9.431308103	0.081035546	108.8060671	137.5520575	106.9357062	91	0.777419896	11.20990793	0.081495749	128.5949265	Flank	RIAIIITDTEIS
54	125	6	34.82630667	139.6456871	101	4.009775956	13.89526521	0.39898762	17.56543321	39.90868611	160.0534464	101	4.010491498	15.92591316	0.399058819	20.1288459	Flank	YIAIIITDTEIS
55	125	7	59.13240335	87.64787431	87	1.482230881	9.39683847	0.158911831	42.59884475	73.61705424	109.4007086	87	1.486078324	11.7289871	0.15932432	53.0335533	Flank	AIAIIITDTEIS
56	125	8	55.35385274	150.1948378	104	2.713358338	14.72781556	0.266066675	37.54832963	66.16513087	179.7067966	104	2.716034778	17.6217012	0.266329122	44.88197337	Flank	NIAIIITDTEIS
57	125	9	148.0664673	71.38682223	8	0.482126869	25.23905304	0.170457589	120.0864391	161.5917923	78.35515544	8	0.484895639	27.70273088	0.171436497	131.0558918	Flank	TIAIIITDTEIS
58	125	10	319.3157991	222.4553232	65	0.696662438	27.59218697	0.086410341	296.6961409	380.6975381	267.3311184	65	0.702213941	33.15834432	0.08709892	353.7297269	Flank	PIAIIITQTEIS
59	125	11	195.7949257	149.8870671	120	0.765530907	13.68275462	0.069883091	172.5387063	235.0033638	182.7508974	120	0.777652262	16.68279815	0.070989614	207.0900266	Flank	PIAIIITETEIS
60	125	12	182.1676747	99.41220928	88	0.545718166	10.59737712	0.058173752	182.3626446	217.6135085	120.7420533	88	0.554846315	12.87114613	0.059146816	217.8464153	Flank	PIAIIITFTEIS
61	125	13	184.9473617	125.7069994	136	0.679690687	10.77928627	0.058282996	187.6957909	220.0747962	150.6164637	136	0.68438761	12.91525521	0.058685753	223.3452402	Flank	PIAIIITYTEIS
62	125	14	1347.4599	789.7534999	141	0.586105382	66.50924271	0.049358977	1311.76965	1564.867533	927.3718072	141	0.592620006	78.0987949	0.049907608	1523.418794	Flank	PIAIIITRTEIS
63	125	15	166.4602562	197.1286742	160	1.184238681	15.58439007	0.093622288	137.7699404	211.2561849	251.0040834	160	1.188150224	19.84361514	0.093931523	174.8450511	Flank	PIAIIITLTEIS
64	125	16	535.892518	211.1133764	154	0.393947236	17.01200067	0.031745173	510.8648778	684.5186228	275.4613885	154	0.402416208	22.19731126	0.032427622	652.5497386	Flank	PIAIIITHTEIS
65	125	17	62.04208749	106.9814004	122	1.724335926	9.685640896	0.156114039	44.72381712	75.42154009	130.2931388	122	1.727532197	11.79618653	0.156403416	54.36856338	Flank	PIAIIITATEIS
66	125	18	-1048.534429	8880.810453	69	-8.469736622	1069.123942	-1.019636469	10.24998871	-1289.893698	10925.81984	69	-8.470325778	1315.314142	-1.019707395	12.60940555	Flank	PIAIIITGTEIS
67	125	19	875.5981694	560.7422818	135	0.640410523	48.26101153	0.055117762	901.2030952	1008.727102	653.2248161	135	0.647573377	56.22064076	0.055734242	1038.225088	Flank	PIAIIITKTEIS
68	125	20	663.5188955	380.9836171	83	0.574186537	41.8183848	0.06302516	563.3338064	832.0488367	488.4186266	83	0.587007162	53.61090912	0.064432407	706.4173175	Flank	PIAIIITDDEIS
69	125	21	521.5026992	227.930668	72	0.437065174	26.86188683	0.051508625	501.5000035	615.3561214	275.1515582	72	0.447141986	32.42692211	0.052696188	591.7535949	Flank	PIAIIITDEEIS
70	125	22	283.4510381	172.4250714	87	0.608306368	18.48590803	0.065217288	270.1702154	335.0738068	206.6197085	87	0.616639392	22.15195795	0.066110682	319.3742496	Flank	PIAIIITDHEIS
71	125	23	116.2658997	135.9085494	105	1.168945922	13.26331632	0.114077441	81.07150484	145.5069994	170.716279	105	1.173251319	16.66020291	0.114497605	101.4611458	Flank	PIAIIITDYEIS
72	125	24	87.97199966	129.2904214	79	1.469676965	14.54630889	0.165351577	89.51198247	120.6603661	178.3633879	79	1.47822681	20.06744897	0.16631351	122.772571	Flank	PIAIIITDREIS
73	125	25	63.50071606	105.1586076	103	1.656022391	10.36158549	0.163172735	53.35209326	74.08711688	122.8117776	103	1.65766712	12.10100402	0.163334795	62.24658577	Flank	PIAIIITDVEIS
74	125	26	209.6334228	267.4625788	79	1.275858474	30.09189113	0.143545293	143.1839233	252.6165884	323.1698277	79	1.279289811	36.35944631	0.143931349	172.5423061	Flank	PIAIIITDAEIS
75	125	27	26.05771738	58.36542477	73	2.239851784	6.831156272	0.262154822	14.76759505	33.30535042	74.70882152	73	2.24314774	8.744006176	0.262540585	18.87501967	Flank	PIAIIITDGEIS
76	125	28	108.5882695	113.8416042	114	1.048378473	10.66224313	0.09818964	101.1755032	139.9040219	148.3000119	114	1.060012499	13.8895687	0.099279267	130.3534893	Flank	PIAIIITDPEIS
77	125	29	60.83492238	134.3506178	91	2.208445618	14.08377154	0.231508005	40.10185546	83.17652613	184.0909484	91	2.213256034	19.29797497	0.232012274	54.82924771	Flank	PIAIIITDFEIS
78	125	30	134.760896	101.1982088	79	0.750946393	11.38568803	0.08448807	133.0009218	174.5037779	133.6609254	79	0.765948606	15.038029	0.086175951	172.2247626	Flank	PIAIIITDQEIS
79	125	31	110.7890541	121.5864153	69	1.097458736	14.63728433	0.132118506	101.1354302	120.9511539	132.9865255	69	1.09950605	16.00969633	0.132364974	110.4120536	Flank	PIAIIITDTHIS
80	125	32	134.8947252	120.1333937	85	0.89057147	13.03029605	0.096596038	147.9127107	156.3449182	140.2306698	85	0.896931422	15.2101517	0.097285872	171.4329497	Flank	PIAIIITDTLIS
81	125	33	241.042598	194.6025846	71	0.807336903	23.0950778	0.095813263	213.6112631	287.0156624	233.2960556	71	0.812833884	27.68714797	0.096465634	254.3524618	Flank	PIAIIITDTFIS
82	125	34	369.6613457	214.6533486	71	0.580675667	25.4746657	0.068913523	372.460034	470.2857299	277.4430983	71	0.589945815	32.92643802	0.070013687	473.8462406	Flank	PIAIIITDTSIS
83	125	35	353.1761723	218.5151672	85	0.618714354	23.70129763	0.067108994	330.224939	480.9502021	305.4895284	85	0.635179125	33.13499163	0.068894849	449.6955445	Flank	PIAIIITDTYIS
84	125	36	101.137368	126.9930719	70	1.255649365	15.17857528	0.150078804	69.17411195	117.0375965	147.3940885	70	1.259373851	17.61696315	0.150523966	80.0492633	Flank	PIAIIITDTPIS
85	125	37	360.036254	259.5442581	74	0.720883675	30.17140715	0.083801025	301.5825045	425.6922852	309.6683157	74	0.727446389	35.99821049	0.084563925	356.5789391	Flank	PIAIIITDTAIS
86	125	38	242.1234476	123.3465842	72	0.509436758	14.53653435	0.060037698	218.1896287	287.3785172	152.2438615	72	0.529767719	17.94211115	0.062433724	258.9712503	Flank	PIAIIITDTGIS
87	125	39	146.9849101	139.8731532	50	0.951615735	19.78105103	0.134578788	129.592932	182.878234	175.7610424	50	0.961082347	24.85636499	0.135917569	161.2391812	Flank	PIAIIITDTQIS
88	125	40	586.9939502	519.8910094	78	0.885683761	58.86606503	0.100283938	486.3557803	630.7020373	560.2208611	78	0.888249646	63.43252151	0.100574467	522.5702606	Flank	PIAIIITDTDIS
89	125	41	351.338907	261.6296336	100	0.744664563	26.16296336	0.074466456	354.1840795	407.2591514	305.4163002	100	0.749931092	30.54163002	0.074993109	410.5571709	Flank	PIAIIITDTTIS
90	125	42	462.4516006	292.9189729	105	0.633404604	28.58596471	0.06181396	446.988473	610.5693509	394.6478186	105	0.646360349	38.5136835	0.063078311	590.1535674	Flank	PIAIIITDTSIS
91	125	43	1.108904801	54.20698155	93	48.88335003	5.621002139	5.068967265	-6.341565538	1.349114105	65.94934633	93	48.88344587	6.838628644	5.068977203	-7.715266005	Flank	PIAIIITDTT(PO4)
92	125	44	56.17105589	181.5093859	85	3.231368594	19.68745709	0.350491134	15.32979998	65.45414374	211.6245273	85	3.233172344	22.9539028	0.350686778	17.86327346	Flank	PIAIIITDTS(PO4)
93	125	45	88.24612834	107.5246028	79	1.218462553	12.09746297	0.137087748	96.45892813	106.094752	129.8774717	79	1.224164902	14.6123572	0.137729312	115.9686691	Flank	PIAIIIFDTEIS
94	125	46	201.7516967	209.8889559	95	1.04033304	21.53415251	0.106735918	206.3167281	300.3167587	314.7731726	95	1.04813722	32.29504609	0.10753661	307.1120198	Flank	PIAIIISDTEIS
95	125	47	98.17875889	188.7243544	86	1.922252395	20.35067051	0.207281807	63.61655932	111.6783082	214.8673287	86	1.923984453	23.16973992	0.207468579	72.36381675	Flank	PIAIIIADTEIS
96	125	48	158.3333768	137.4208706	97	0.867921049	13.95297539	0.088124031	137.3233109	206.8904128	181.277534	97	0.876200746	18.40594489	0.088964707	179.4370654	Flank	PIAIIIHDTEIS
97	2000	1	2139.664649	1491.476042	91	0.697060655	156.349172	0.073071812	2199.075974	2543.941552	1793.935945	91	0.705179702	188.0555849	0.073922919	2614.578293	Flank	PIAIIITDTEIS
98	2000	2	204.7355218	306.6536493	105	1.497803833	29.92633187	0.146170687	214.232306	253.3782635	381.3168046	105	1.504931005	37.21270974	0.146866228	265.1313715	Flank	SCRAMBLED
99	2000	3	865.6467059	674.5063212	100	0.77919354	67.45063212	0.077919354	647.2782331	1081.309662	854.2772545	100	0.790039417	85.42772545	0.079003942	808.5379435	Flank	HIAIIITDTEIS
100	2000	4	1649.73497	667.9031048	108	0.40485479	64.26900622	0.03895717	1684.106663	1949.838803	816.4421472	108	0.418722894	78.56218225	0.040291629	1990.463063	Flank	LIAIIITDTEIS
101	2000	5	890.2563153	559.526093	75	0.628499999	64.60850808	0.072572929	821.6427997	1052.169686	666.9617287	75	0.633891793	77.01410672	0.073195519	971.0772408	Flank	RIAIIITDTEIS
102	2000	6	905.245903	602.3486501	89	0.66539782	63.84882921	0.070532028	952.4066747	1037.353026	694.7114572	89	0.669696275	73.63926718	0.070987663	1091.396208	Flank	YIAIIITDTEIS
103	2000	7	998.6671876	555.3155707	94	0.55605669	57.2764278	0.057352868	970.7050409	1243.293564	703.9934429	94	0.566232677	72.61137942	0.058402441	1208.48201	Flank	AIAIIITDTEIS
104	2000	8	570.8629656	381.9030451	82	0.668992505	42.17413608	0.073877863	535.3061013	682.3594196	463.8450374	82	0.679766446	51.22311534	0.075067646	639.8578689	Flank	NIAIIITDTEIS
105	2000	9	1596.646579	816.6286746	16	0.511464895	204.1571686	0.127866224	1747.013556	1742.494348	895.7739625	16	0.514075677	223.9434906	0.128518919	1906.596793	Flank	TIAIIITDTEIS
106	2000	10	3254.409549	896.3938241	68	0.275439772	108.7037182	0.033401979	3228.378203	3880.001261	1122.0715	68	0.289193592	136.0711563	0.035069874	3848.965937	Flank	PIAIIITQTEIS
107	2000	11	792.8420443	503.515592	104	0.635076805	49.37376594	0.062274404	756.0364722	951.6107056	618.2013674	104	0.649636836	60.61963146	0.063702133	907.434723	Flank	PIAIIITETEIS
108	2000	12	1959.677843	873.1892306	71	0.445577947	103.6284963	0.052880374	1904.331604	2340.988168	1069.157319	71	0.456711971	126.8856296	0.054201739	2274.872765	Flank	PIAIIITFTEIS
109	2000	13	2146.1019	936.4242371	117	0.436337267	86.57245134	0.040339395	2136.90978	2553.715467	1132.874869	117	0.443618282	104.7343187	0.041012525	2542.77747	Flank	PIAIIITYTEIS
110	2000	14	18297.9151	9571.92384	119	0.523115545	877.4568198	0.047953923	19508.87887	21250.21551	11271.20779	119	0.530404399	1033.229924	0.048622092	22656.56377	Flank	PIAIIITRTEIS
111	2000	15	1800.093496	904.286798	164	0.502355461	70.61293553	0.039227371	1650.103414	2284.514594	1168.548108	164	0.51150827	91.24827698	0.039942085	2094.160852	Flank	PIAIIITLTEIS
112	2000	16	4989.645646	1877.120692	134	0.376203207	162.1585296	0.032499007	5003.896975	6373.489554	2454.192676	134	0.385062634	212.0099563	0.033264345	6391.693392	Flank	PIAIIITHTEIS
113	2000	17	1050.771779	2770.109958	89	2.636262233	293.6310683	0.279443238	622.0368888	1277.372008	3370.159508	89	2.638353969	357.2361934	0.279664961	756.1799102	Flank	PIAIIITATEIS
114	2000	18	233.5072907	494.4380956	73	2.11744179	57.86960192	0.247827816	57.74400282	287.2576946	608.928051	73	2.11979718	71.26963764	0.248103494	71.03593671	Flank	PIAIIITGTEIS
115	2000	19	11286.47089	5635.950813	127	0.49935457	500.109764	0.044310553	11179.13579	13002.50442	6611.880597	127	0.508508237	586.7095287	0.045122809	12878.84973	Flank	PIAIIITKTEIS
116	2000	20	2271.314514	1414.541905	105	0.62278557	138.0451548	0.060777648	2279.978883	2848.215194	1807.549027	105	0.634625161	176.3987227	0.061933074	2859.080262	Flank	PIAIIITDDEIS
117	2000	21	1671.99573	805.5222524	77	0.481772913	91.79778024	0.054903119	1611.006739	1972.900253	968.5616752	77	0.490932917	110.3778468	0.055946998	1900.935239	Flank	PIAIIITDEEIS
118	2000	22	2005.28333	957.4630924	87	0.47747023	102.6508183	0.051190182	1806.962653	2370.490239	1156.899598	87	0.488042338	124.0326561	0.052323631	2136.050935	Flank	PIAIIITDHEIS
119	2000	23	987.442241	719.312711	128	0.728460543	63.57886196	0.064387424	858.9755828	1235.785883	908.7345007	128	0.735349475	80.32154097	0.064996325	1075.009611	Flank	PIAIIITDYEIS
120	2000	24	973.0453982	802.3848434	84	0.82461193	87.54736384	0.089972538	881.6346886	1334.606629	1120.742983	84	0.839755294	122.2830846	0.091624814	1209.229808	Flank	PIAIIITDREIS
121	2000	25	674.6446184	508.1673803	96	0.753237136	51.86461607	0.076876943	633.3964558	787.1167098	595.7263607	96	0.756846289	60.80106708	0.077245301	738.9919384	Flank	PIAIIITDVEIS
122	2000	26	1341.91489	792.6836817	78	0.590710848	89.75375281	0.066884833	1209.702367	1617.060661	967.1413678	78	0.598086015	109.5071959	0.067719906	1457.739328	Flank	PIAIIITDAEIS
123	2000	27	502.1520437	378.0499315	65	0.75285949	46.89132291	0.093380727	432.2186791	641.8194478	489.4575782	65	0.762609453	60.7097408	0.094590061	552.4349795	Flank	PIAIIITDGEIS
124	2000	28	723.9086664	466.7280481	97	0.644733334	47.38905338	0.065462752	641.2072407	932.6765626	618.8153636	97	0.663483343	62.83118063	0.067366527	826.1248869	Flank	PIAIIITDPEIS
125	2000	29	708.1909423	831.1752486	115	1.173659813	77.50749158	0.109444342	604.5533613	968.2738156	1145.164461	115	1.182686594	106.7871366	0.110286094	826.5753696	Flank	PIAIIITDFEIS
126	2000	30	635.7970212	386.4979578	72	0.607895201	45.54922114	0.071641136	655.7216294	823.3024971	515.6617399	72	0.626333264	60.77131884	0.073814083	849.1031523	Flank	PIAIIITDQEIS
127	2000	31	1463.433055	761.3469609	77	0.520247208	86.76353855	0.059287672	1430.552765	1597.666106	838.0593082	77	0.524552224	95.50572187	0.059778274	1561.76988	Flank	PIAIIITDTHIS
128	2000	32	1969.167864	975.83035	96	0.49555468	99.59526804	0.050577338	1902.149147	2282.293752	1156.884038	96	0.506895327	118.0739827	0.051734788	2204.618099	Flank	PIAIIITDTLIS
129	2000	33	2379.003405	853.0743105	64	0.358584737	106.6342888	0.044823092	2385.48643	2832.74095	1050.366675	64	0.370795175	131.2958344	0.046349397	2840.460457	Flank	PIAIIITDTFIS
130	2000	34	2829.518793	893.9142539	99	0.31592448	89.84176288	0.031751605	2827.183104	3599.733449	1197.473454	99	0.332656145	120.3506104	0.033433201	3596.76197	Flank	PIAIIITDTSIS
131	2000	35	3540.05196	1773.779327	98	0.501060252	179.17877	0.050614729	3431.503934	4820.791545	2512.860171	98	0.521254684	253.8372096	0.052654674	4672.972414	Flank	PIAIIITDTYIS
132	2000	36	1072.269869	568.6422137	86	0.530316322	61.31826687	0.05718548	964.9752958	1240.845899	668.9098237	86	0.539075662	72.13040131	0.058130024	1116.683096	Flank	PIAIIITDTPIS
133	2000	37	2528.413093	1188.998289	80	0.470254758	132.9340499	0.05257608	2277.754014	2989.49324	1435.717981	80	0.480254634	160.5181501	0.0536941	2693.124097	Flank	PIAIIITDTAIS
134	2000	38	2202.74349	589.7239629	88	0.267722486	62.86478567	0.028539313	2205.749167	2614.456237	796.4586178	88	0.304636431	84.90277393	0.032474353	2618.023703	Flank	PIAIIITDTGIS
135	2000	39	1495.069208	660.1160983	50	0.44152879	93.3545139	0.0624416	1436.240075	1860.16113	858.6098442	50	0.46157821	121.4257686	0.065277016	1786.966078	Flank	PIAIIITDTQIS
136	2000	40	3860.518565	2325.289441	83	0.602325673	255.2336747	0.066113832	4337.418468	4147.976181	2514.056589	83	0.60609234	275.953561	0.066527277	4660.386471	Flank	PIAIIITDTDIS
137	2000	41	3015.640623	1465.593337	99	0.485997345	147.2976725	0.048844571	3304.074363	3495.619804	1726.937903	99	0.494029099	173.5637897	0.049651793	3829.961597	Flank	PIAIIITDTTIS
138	2000	42	3069.212169	1664.34388	98	0.542270716	168.1241206	0.054777614	3085.368208	4052.244342	2258.514076	98	0.557348937	228.1443741	0.056300745	4073.574968	Flank	PIAIIITDTSIS
139	2000	43	548.8261255	410.8429021	90	0.748584812	43.30664437	0.078907768	521.5763475	667.7120221	504.0005569	90	0.754817257	53.1263234	0.079564725	634.5594378	Flank	PIAIIITDTT(PO4)
140	2000	44	748.8368044	709.4541887	84	0.94740828	77.40779813	0.103370718	562.3958067	872.5930296	832.0543386	84	0.95354227	90.78457116	0.104039991	655.3399324	Flank	PIAIIITDTS(PO4)
141	2000	45	1105.347602	597.3180239	86	0.540389306	64.41045901	0.058271677	1089.116991	1328.914729	735.0584242	86	0.553126855	79.26338834	0.059645203	1309.401321	Flank	PIAIIIFDTEIS
142	2000	46	1330.18058	1522.136	83	1.14430779	167.0761316	0.125604098	1371.146795	1980.035493	2279.827619	83	1.151407451	250.2435915	0.126383387	2041.015605	Flank	PIAIIISDTEIS
143	2000	47	741.1404186	596.2752244	85	0.804537453	64.67512871	0.087264339	629.0049105	843.0469991	681.7443402	85	0.808667062	73.94555592	0.087712258	715.4928931	Flank	PIAIIIADTEIS
144	2000	48	1008.187639	580.3135667	92	0.575600755	60.50187167	0.060010527	983.5623656	1317.374524	774.6308141	92	0.588011078	80.76084516	0.061304393	1285.197271	Flank	PIAIIIHDTEIS
145	250	1	554.3914619	332.3155439	54	0.599423993	45.22241757	0.081571274	561.0607122	659.1404296	401.315299	54	0.608846432	54.61209492	0.082853505	667.069795	Flank	PIAIIITDTEIS
146	250	2	-20.05585895	77.13888107	107	-3.846201814	7.457297106	-0.371826364	-27.13964967	-24.82089414	95.53519721	107	-3.848982904	9.235736113	-0.372095222	-33.58770986	Flank	SCRAMBLED
147	250	3	179.8780914	175.1653373	99	0.973800289	17.60477879	0.097870611	129.3502031	224.692033	220.7599749	99	0.982500234	22.18721229	0.098744989	161.5758755	Flank	HIAIIITDTEIS
148	250	4	274.4563965	120.1820093	108	0.437891085	11.56451924	0.042136089	272.8018912	324.3828502	146.2135912	108	0.450743901	14.06940937	0.043372852	322.4273734	Flank	LIAIIITDTEIS
149	250	5	163.1434291	113.2946025	89	0.694447844	12.00920385	0.073611324	135.3480826	192.8147743	134.8414202	89	0.69933137	14.29316195	0.074128977	159.9642115	Flank	RIAIIITDTEIS
150	250	6	143.5767913	182.6398434	116	1.272070797	16.95768374	0.118108808	125.3622336	164.5296801	209.6642039	116	1.27432451	19.46683263	0.11831806	143.6569797	Flank	YIAIIITDTEIS
151	250	7	168.4372341	125.814617	88	0.746952523	13.41188323	0.079625406	140.7954447	209.6964151	158.2282046	88	0.754558462	16.86718328	0.080436202	175.2836905	Flank	AIAIIITDTEIS
152	250	8	152.0274985	111.9213928	79	0.736191767	12.59214049	0.082828045	131.7746918	181.7203111	135.562593	79	0.745995823	15.25198332	0.083931087	157.5118858	Flank	NIAIIITDTEIS
153	250	9	218.2801263	86.54365603	8	0.396479778	30.59780302	0.14017677	239.1872	238.2192098	95.25006108	8	0.399842066	33.67598205	0.141365518	261.0360674	Flank	TIAIIITDTEIS
154	250	10	540.8427811	317.0384624	57	0.586193388	41.99277019	0.077643211	541.923491	644.8084179	382.2297654	57	0.592780359	50.62756922	0.078515677	646.0968716	Flank	PIAIIITQTEIS
155	250	11	287.2235429	198.0070772	73	0.689383172	23.17497547	0.080686197	277.985438	344.7407971	242.2904024	73	0.702819058	28.35794665	0.082258749	333.6527379	Flank	PIAIIITETEIS
156	250	12	315.4818753	123.8472228	78	0.392565255	14.02293661	0.044449262	296.7792159	376.8677285	152.6912502	78	0.40515873	17.28887959	0.045875193	354.5259418	Flank	PIAIIITFTEIS
157	250	13	391.3224239	267.2431114	130	0.682923071	23.43877139	0.059896316	368.8602645	465.6471003	320.1779746	130	0.687597914	28.08146602	0.060306326	438.9186565	Flank	PIAIIITYTEIS
158	250	14	2662.114441	1643.764597	110	0.61746579	156.7268049	0.058873053	2636.720124	3091.636685	1928.108221	110	0.623652912	183.8379057	0.059462972	3062.14509	Flank	PIAIIITRTEIS
159	250	15	296.2311118	166.3812255	127	0.5616602	14.76394635	0.049839283	276.1107376	375.9495267	214.2390796	127	0.569861283	19.01064418	0.050567012	350.4145817	Flank	PIAIIITLTEIS
160	250	16	888.6975803	399.0334881	145	0.449009311	33.13792749	0.037288194	862.7445713	1135.171743	518.1580183	145	0.456457819	43.03068127	0.037906759	1102.020845	Flank	PIAIIITHTEIS
161	250	17	149.178816	257.0352126	90	1.723000755	27.09389036	0.181620227	85.7751776	181.3494115	313.0452631	90	1.726199498	32.99786807	0.181957404	104.2727003	Flank	PIAIIITATEIS
162	250	18	75.22447408	165.0791531	69	2.194487302	19.87319468	0.264185226	33.52144269	92.54018978	203.2885951	69	2.196760085	24.47307095	0.264458837	41.23765179	Flank	PIAIIITGTEIS
163	250	19	1417.179071	846.3994189	105	0.597242392	82.60012546	0.058284889	1379.039928	1632.651812	987.6182137	105	0.604916619	96.38166868	0.059033817	1588.713862	Flank	PIAIIITKTEIS
164	250	20	957.9686668	615.6246849	93	0.642635512	63.83730603	0.066638198	835.3112513	1201.287138	785.7810356	93	0.654115915	81.48169765	0.067828661	1047.475452	Flank	PIAIIITDDEIS
165	250	21	726.9064856	376.0467776	75	0.517324835	43.42214166	0.059735527	709.3630841	857.7258684	451.0488096	75	0.525865928	52.08263033	0.060721767	837.0252287	Flank	PIAIIITDEEIS
166	250	22	522.6644353	281.8075724	82	0.539174953	31.12044028	0.059541913	478.2283225	617.8533097	338.9290819	82	0.548559143	37.42845575	0.060578223	565.3243877	Flank	PIAIIITDHEIS
167	250	23	212.1158227	211.505379	80	0.997122121	23.64702025	0.111481642	182.9445399	265.4633642	266.0383474	80	1.00216596	29.74399147	0.112045561	228.9554472	Flank	PIAIIITDYEIS
168	250	24	227.2712523	239.8983345	88	1.055559523	25.57324839	0.112523023	187.2663022	311.7200086	332.739759	88	1.067431508	35.47017749	0.113788581	256.8501416	Flank	PIAIIITDREIS
169	250	25	135.8836695	185.9114949	87	1.368166576	19.9318044	0.146682854	112.4807852	158.5372564	217.2209141	87	1.37015689	23.28852648	0.146896238	131.2328048	Flank	PIAIIITDVEIS
170	250	26	366.5807661	282.81943	83	0.771506462	31.04346545	0.084683836	326.2665056	441.7443615	343.3094961	83	0.777167806	37.68311278	0.085305249	393.1640788	Flank	PIAIIITDAEIS
171	250	27	86.56043183	112.5354372	56	1.300079434	15.03818035	0.173730422	58.84780054	110.6361495	144.4631199	56	1.305749708	19.30469642	0.174488144	75.21559122	Flank	PIAIIITDGEIS
172	250	28	186.6070657	208.3062635	82	1.11628283	23.00357857	0.123272816	178.0201839	240.4226454	271.0083082	82	1.127216231	29.92786106	0.124480209	229.3593942	Flank	PIAIIITDPEIS
173	250	29	170.6308249	259.9815264	95	1.523649238	26.6735418	0.156323113	112.9370992	233.2949351	357.0843419	95	1.530613349	36.63608047	0.157037616	154.413209	Flank	PIAIIITDFEIS
174	250	30	229.9992061	182.7210025	74	0.794441883	21.24088509	0.092351993	207.4624992	297.829204	240.835878	74	0.808637551	27.99660214	0.094002206	268.6461054	Flank	PIAIIITDQEIS
175	250	31	255.1074765	207.722146	61	0.814253462	26.59609546	0.104254473	216.0013607	278.5071494	227.5433372	61	0.817010758	29.13393895	0.104607508	235.8140344	Flank	PIAIIITDTHIS
176	250	32	356.8230357	269.0869854	101	0.754118872	26.77515578	0.075037632	320.2199821	413.563008	314.9775002	101	0.761619135	31.34143268	0.075783936	371.1395447	Flank	PIAIIITDTLIS
177	250	33	397.4256767	182.2800415	47	0.4586519	26.58827671	0.066901255	377.4054056	473.2250432	221.5924523	47	0.468260198	32.32258117	0.06830277	449.3863881	Flank	PIAIIITDTFIS
178	250	34	672.374678	276.8636989	77	0.411769967	31.55154673	0.046925543	644.1419969	855.3997325	363.3247702	77	0.424742675	41.40470026	0.04840392	819.4819197	Flank	PIAIIITDTSIS
179	250	35	613.7291619	385.4524838	70	0.62804981	46.07038362	0.07506631	588.5604472	835.7674939	538.4649829	70	0.644276054	64.35887527	0.077005717	801.4931023	Flank	PIAIIITDTYIS
180	250	36	198.5555442	202.1685377	89	1.018196387	21.42982214	0.107928601	158.7095089	229.7712915	235.006843	89	1.022785925	24.91067553	0.108415091	183.6608944	Flank	PIAIIITDTPIS
181	250	37	611.9742748	415.4855874	71	0.678926557	49.30906744	0.080573759	495.4808927	723.5735973	496.292503	71	0.685890841	58.89908397	0.081400267	585.8365404	Flank	PIAIIITDTAIS
182	250	38	399.6624373	176.1773063	83	0.440815273	19.33797165	0.048385762	385.2388801	474.3629736	220.1811481	83	0.46416175	24.16802078	0.050948371	457.2435227	Flank	PIAIIITDTGIS
183	250	39	317.5286855	158.869419	31	0.500330919	28.53378999	0.089862086	314.2365655	395.0683455	204.6887948	31	0.518109834	36.76319281	0.093055273	390.9722985	Flank	PIAIIITDTQIS
184	250	40	774.8760888	734.7117964	55	0.948166819	99.06851841	0.127850788	772.5116296	832.5740456	791.4149621	55	0.950564056	106.7143717	0.128174031	830.0335267	Flank	PIAIIITDTDIS
185	250	41	499.3942831	354.6158014	95	0.710091832	36.38281355	0.072853885	537.0136801	578.8795033	414.2536072	95	0.715612843	42.50152333	0.073420329	622.486526	Flank	PIAIIITDTTIS
186	250	42	672.6967961	439.3741872	100	0.653153382	43.93741872	0.065315338	674.1598985	888.1535833	591.2659592	100	0.665724904	59.12659592	0.06657249	890.0852999	Flank	PIAIIITDTSIS
187	250	43	39.4879158	170.0107375	76	4.305386446	19.50156905	0.493861696	33.40646734	48.04172922	206.8904801	76	4.306474465	23.73196566	0.4939865	40.64292647	Flank	PIAIIITDTT(PO4)
188	250	44	147.2141727	272.3865799	73	1.850274161	31.88043779	0.21655821	63.13573657	171.5434661	317.9425161	73	1.853422478	37.21235682	0.216926693	73.56983968	Flank	PIAIIITDTS(PO4)
189	250	45	179.7002391	112.4091343	73	0.625536921	13.15649404	0.073213559	168.3378377	216.0463316	137.5292564	73	0.636572977	16.09658195	0.074505231	202.3857757	Flank	PIAIIIFDTEIS
190	250	46	335.4600282	313.0428561	90	0.933174834	32.99761435	0.098365264	339.4351595	499.3478121	470.3193911	90	0.941867331	49.57601678	0.099281534	505.2649796	Flank	PIAIIISDTEIS
191	250	47	152.1982437	183.3690678	83	1.204804098	20.12737003	0.13224443	99.18622135	173.1254556	209.0603549	83	1.207565659	22.94735515	0.132547551	112.8242964	Flank	PIAIIIADTEIS
192	250	48	323.6505357	286.0771232	73	0.883907461	33.48279468	0.103453543	283.1825949	422.9063656	377.2488814	73	0.892038787	44.15364186	0.104405243	370.0278813	Flank	PIAIIIHDTEIS
193	500	1	1025.884669	568.2769174	65	0.553938405	70.48607663	0.068707603	998.7927196	1219.719473	688.069486	65	0.564121096	85.34451607	0.06997061	1187.50866	Flank	PIAIIITDTEIS
194	500	2	132.345562	202.5076356	79	1.530143003	22.78388907	0.172154538	99.92804746	163.7893043	251.7638538	79	1.537120234	28.32564658	0.172939538	123.6697712	Flank	SCRAMBLED
195	500	3	487.0595769	386.8193461	112	0.794193081	36.55099258	0.075044192	428.2394329	608.4032005	489.6653163	112	0.804836851	46.2690233	0.076049934	534.9288956	Flank	HIAIIITDTEIS
196	500	4	587.2330494	258.6132327	116	0.440392844	24.01163585	0.040889449	578.1539021	694.0568073	314.5289928	116	0.453174711	29.20328384	0.042076216	683.3260694	Flank	LIAIIITDTEIS
197	500	5	600.7999529	259.2504785	80	0.43150882	28.98508466	0.048244153	554.5196856	710.0690966	311.9510759	80	0.439324958	34.87719057	0.049118023	655.3717095	Flank	RIAIIITDTEIS
198	500	6	334.4974104	245.905046	84	0.735147832	26.83044017	0.080211204	300.8795801	383.3123128	283.2834053	84	0.739040714	30.90875353	0.080635953	344.7884622	Flank	YIAIIITDTEIS
199	500	7	439.414811	189.5931421	80	0.431467346	21.19715769	0.048239516	427.0012687	547.0507226	243.1666443	80	0.444504749	27.18685732	0.049697142	531.5964476	Flank	AIAIIITDTEIS
200	500	8	308.038781	185.1718714	111	0.601131685	17.57573623	0.057056894	282.2667688	368.2024873	225.7446873	111	0.6130993	21.4267375	0.05819281	337.3968888	Flank	NIAIIITDTEIS
201	500	9	534.5981878	247.9785732	13	0.463859734	68.77688161	0.128651543	444.8639837	583.4317581	272.3091193	13	0.466736881	75.52496095	0.12944952	485.5006658	Flank	TIAIIITDTEIS
202	500	10	1267.063419	751.3035324	49	0.592948641	107.3290761	0.084706949	1171.801337	1510.629682	905.5641669	49	0.599461389	129.3663096	0.085637341	1397.055471	Flank	PIAIIITQTEIS
203	500	11	553.4879105	325.5367695	88	0.588155158	34.70233623	0.062697551	491.8336851	664.3252901	401.1512521	88	0.60384763	42.76286716	0.064370374	590.3246473	Flank	PIAIIITETEIS
204	500	12	876.8736036	396.1772951	90	0.451806616	41.76075366	0.047624599	793.3562441	1047.493974	484.7705857	90	0.462790811	51.09930645	0.048782435	947.7259677	Flank	PIAIIITFTEIS
205	500	13	845.0857888	421.3013841	135	0.498530906	36.25984987	0.042906709	735.6760076	1005.594678	507.7407107	135	0.504915869	43.6993626	0.043456239	875.4044715	Flank	PIAIIITYTEIS
206	500	14	4824.185656	2813.854058	150	0.583280632	229.7502218	0.047624664	5019.128892	5602.550034	3304.53223	150	0.589826456	269.8139267	0.048159128	5828.946633	Flank	PIAIIITRTEIS
207	500	15	652.659781	381.1297028	168	0.583963826	29.40479496	0.045053787	630.5506401	828.2963065	490.2320875	168	0.591855938	37.82222668	0.045662677	800.2374001	Flank	PIAIIITLTEIS
208	500	16	1565.221561	666.1187915	123	0.425574761	60.06190874	0.038372784	1586.767643	1999.324997	866.5598034	123	0.433426184	78.13506614	0.039080723	2026.846737	Flank	PIAIIITHTEIS
209	500	17	323.9114245	233.6610295	114	0.721373227	21.88436049	0.067562793	268.8274558	393.7633223	287.0457479	114	0.728980409	26.88429747	0.068275271	326.8004279	Flank	PIAIIITATEIS
210	500	18	261.0064005	262.8692863	61	1.007137318	33.65696325	0.12895072	186.3383995	321.0867491	324.9654779	61	1.012080003	41.60756588	0.129583566	229.2311254	Flank	PIAIIITGTEIS
211	500	19	2829.804954	1512.744271	99	0.534575455	152.0365198	0.053726855	3023.253284	3260.058152	1770.654475	99	0.543135856	177.9574705	0.054587207	3482.919026	Flank	PIAIIITKTEIS
212	500	20	1398.545421	669.6047146	79	0.478786534	75.33641629	0.053867694	1254.555241	1753.767825	866.5170969	79	0.494088832	97.49079017	0.055589337	1573.204977	Flank	PIAIIITDDEIS
213	500	21	1162.418768	465.0435657	86	0.400065431	50.14693735	0.043140165	1180.446236	1371.616112	563.8031965	86	0.411050287	60.79646222	0.044324692	1392.887934	Flank	PIAIIITDEEIS
214	500	22	1014.496109	495.4464293	74	0.488367008	57.59447753	0.056771512	930.8195289	1199.258523	598.0800217	74	0.498708169	69.5253903	0.057973647	1100.342568	Flank	PIAIIITDHEIS
215	500	23	589.0191032	362.9078853	122	0.616122437	32.85613614	0.055781104	474.5906238	737.1585523	460.1729284	122	0.624252309	41.66209938	0.056517149	593.9510879	Flank	PIAIIITDYEIS
216	500	24	528.5320458	353.9070629	90	0.669603794	37.30507996	0.070582437	473.1076464	724.9223657	498.8674076	90	0.688166666	52.58524194	0.072539136	648.9035376	Flank	PIAIIITDREIS
217	500	25	434.0361264	238.5722442	97	0.549659878	24.22334132	0.055809505	424.2938448	506.3956317	280.8447085	97	0.554595441	28.51545978	0.056310635	495.0291842	Flank	PIAIIITDVEIS
218	500	26	722.8517068	482.1647594	91	0.667031363	50.54460061	0.069923886	632.8594664	871.0649746	586.7244448	91	0.673571389	61.50543388	0.070609467	762.6207559	Flank	PIAIIITDAEIS
219	500	27	286.1377793	445.1143873	62	1.55559461	56.52958372	0.197560713	192.5880084	365.7234772	570.6517332	62	1.560336617	72.47284259	0.198162949	246.1539902	Flank	PIAIIITDGEIS
220	500	28	411.241265	223.7414937	99	0.54406382	22.48686621	0.054680471	406.4499316	529.8390629	299.9724528	99	0.566157677	30.14836586	0.056900987	523.6659576	Flank	PIAIIITDPEIS
221	500	29	379.5656374	233.4388165	118	0.615015675	21.48978493	0.056616782	352.3981355	518.9609837	328.020498	118	0.632071598	30.19673447	0.058186907	481.8162262	Flank	PIAIIITDFEIS
222	500	30	313.558218	211.0728527	67	0.67315363	25.78665314	0.082238805	295.8210528	406.0309426	280.1003191	67	0.689849688	34.21970035	0.084278553	383.0628382	Flank	PIAIIITDQEIS
223	500	31	504.2651504	248.2539568	83	0.492308375	27.24941186	0.054037864	497.6698957	550.5187521	273.5282843	83	0.496855526	30.02362971	0.054536979	543.3185492	Flank	PIAIIITDTHIS
224	500	32	720.3174804	431.5619225	103	0.599127377	42.52305976	0.059033775	693.3684491	834.8582745	508.0454187	103	0.608540916	50.05920257	0.059961318	803.6239614	Flank	PIAIIITDTLIS
225	500	33	987.6563145	418.3896801	49	0.423618696	59.7699543	0.060516957	877.3397603	1176.027946	510.3999863	49	0.43400328	72.91428376	0.062000469	1044.671168	Flank	PIAIIITDTFIS
226	500	34	1270.09822	631.5220031	103	0.497222965	62.22571195	0.048992835	1329.927509	1615.827772	820.8699472	103	0.508018219	80.88271925	0.050056523	1691.943008	Flank	PIAIIITDTSIS
227	500	35	1280.857166	796.4959481	111	0.621846033	75.60004977	0.059023013	1387.581443	1744.252759	1113.234473	111	0.63823002	105.6635401	0.060578113	1889.588335	Flank	PIAIIITDTYIS
228	500	36	378.1079907	270.7671687	86	0.716110676	29.19757469	0.0772202	323.019448	437.5519287	316.184381	86	0.722621386	34.09503865	0.077922268	373.8026859	Flank	PIAIIITDTPIS
229	500	37	1031.27719	514.7294823	89	0.499118459	54.56121601	0.052906451	951.677163	1219.340383	620.0968816	89	0.508551091	65.73013799	0.053906308	1125.224534	Flank	PIAIIITDTAIS
230	500	38	923.108628	359.5853141	88	0.389537378	38.33192328	0.041524824	897.2819574	1095.646008	455.5402999	88	0.415773249	48.56075914	0.044321577	1064.992098	Flank	PIAIIITDTGIS
231	500	39	645.2459326	283.2455401	63	0.438972996	35.68558377	0.055305399	649.7215882	802.8132722	368.5988973	63	0.459134035	46.43909599	0.057845451	808.3818709	Flank	PIAIIITDTQIS
232	500	40	2113.85519	1188.082625	85	0.562045419	128.8656539	0.060962385	2285.488186	2271.254711	1285.712258	85	0.566080172	139.4550743	0.061400015	2455.667652	Flank	PIAIIITDTDIS
233	500	41	970.760391	553.7541852	125	0.570433436	49.52928004	0.051021118	985.4334897	1125.269776	649.6088328	125	0.577291639	58.10278036	0.051634534	1142.278293	Flank	PIAIIITDTTIS
234	500	42	1481.633243	777.0898832	110	0.524481944	74.09261321	0.050007391	1368.833302	1956.182758	1056.45029	110	0.54005705	100.7285829	0.051492419	1807.254337	Flank	PIAIIITDTSIS
235	500	43	239.2208888	161.0731521	84	0.673323943	17.57452172	0.073465665	221.5520321	291.0405609	197.9792592	84	0.680246281	21.60130812	0.074220954	269.5443028	Flank	PIAIIITDTT(PO4)
236	500	44	286.9221969	276.3803113	87	0.963258731	29.63107961	0.103272176	237.7803995	334.340283	324.073502	87	0.96929242	34.74432637	0.103919055	277.0770853	Flank	PIAIIITDTS(PO4)
237	500	45	509.8118319	194.9555425	79	0.382406861	21.93421221	0.043024133	520.6597768	612.926152	245.295866	79	0.400204601	27.5979411	0.045026535	625.9681976	Flank	PIAIIIFDTEIS
238	500	46	589.0436373	424.8167072	84	0.721197345	46.35130279	0.078689082	613.9175904	876.8187767	642.1908404	84	0.73241	70.06876516	0.079912483	913.8448096	Flank	PIAIIISDTEIS
239	500	47	395.6742315	375.7031688	73	0.949526501	43.97272988	0.111133671	298.8633049	450.0793171	428.9382182	73	0.953028059	50.20342113	0.111543497	339.9569178	Flank	PIAIIIADTEIS
240	500	48	499.3426312	318.3882343	76	0.637614765	36.52163522	0.07313943	460.581142	652.4789983	423.354494	76	0.648840032	48.56209096	0.074427056	601.8302933	Flank	PIAIIIHDTEIS
241	63	1	121.3822836	109.9309511	62	0.905658947	13.96124475	0.115018801	121.653236	144.3167438	131.6057124	62	0.911922684	16.71394219	0.115814297	144.6388911	Flank	PIAIIITDTEIS
242	63	2	-59.08413826	39.3000638	91	-0.665154218	4.119766096	-0.069727108	-68.14712764	-73.12183161	49.79973283	91	-0.681051496	5.22043048	-0.071393596	-84.33808022	Flank	SCRAMBLED
243	63	3	3.763073106	63.00721906	84	16.74355435	6.874651206	1.826871552	-12.23284336	4.700586602	78.70691625	84	16.74406259	8.587628605	1.826927006	-15.28047369	Flank	HIAIIITDTEIS
244	63	4	47.80039728	54.0111503	84	1.129930992	5.893099634	0.123285579	45.71524234	56.49578333	64.12123341	84	1.134973791	6.996200137	0.123835793	54.03131716	Flank	LIAIIITDTEIS
245	63	5	36.14214735	48.59809396	67	1.344637702	5.937202136	0.164273641	36.35020825	42.71541933	57.54477447	67	1.347166325	7.030213122	0.164582561	42.96132083	Flank	RIAIIITDTEIS
246	63	6	0.599879838	59.30348523	76	98.85894056	6.802576292	11.3398982	2.869062867	0.687423343	67.95796334	76	98.85896958	7.795313016	11.33990153	3.287759752	Flank	YIAIIITDTEIS
247	63	7	54.3467468	285.6401544	81	5.255883218	31.73779494	0.583987024	7.901403696	67.65913746	355.6820251	81	5.256969545	39.52022501	0.584107727	9.836875073	Flank	AIAIIITDTEIS
248	63	8	-18.92703475	46.57404505	87	-2.460715356	4.99326175	-0.263816378	-24.99211945	-22.62371396	55.73728111	87	-2.463666275	5.975663773	-0.26413275	-29.8733832	Flank	NIAIIITDTEIS
249	63	9	27.94855006	59.97707653	6	2.145981684	24.48553896	0.876093354	11.56539766	30.5015469	65.47478606	6	2.146605426	26.72996948	0.876347995	12.62185403	Flank	TIAIIITDTEIS
250	63	10	160.7714701	146.1206319	58	0.908871654	19.18657894	0.119340695	160.3404217	191.6764001	175.0262218	58	0.913133916	22.98206884	0.119900357	191.1624917	Flank	PIAIIITQTEIS
251	63	11	109.97001	96.3033091	71	0.875723382	11.42910009	0.103929245	85.95524977	131.9917877	116.9894758	71	0.886339051	13.88409641	0.105189093	103.1680099	Flank	PIAIIITETEIS
252	63	12	94.04810476	84.70577873	67	0.900664388	10.34845792	0.110033668	86.98924573	112.3478031	101.8123077	67	0.906224286	12.43835306	0.110712918	103.9154449	Flank	PIAIIITFTEIS
253	63	13	92.48783943	62.3970384	108	0.674651271	6.00415782	0.064918349	91.92791661	110.0542458	74.76898747	108	0.679383034	7.194649174	0.065373663	109.3879757	Flank	PIAIIITYTEIS
254	63	14	829.0666058	409.2401992	138	0.493615587	34.83683922	0.042019349	798.0568617	962.833413	482.7006658	138	0.501333522	41.09020942	0.042676343	926.8203622	Flank	PIAIIITRTEIS
255	63	15	61.98278129	75.69777883	91	1.221271089	7.935283372	0.128023996	51.46978664	78.66289651	96.36711383	91	1.225064396	10.10201842	0.128421643	65.32076192	Flank	PIAIIITLTEIS
256	63	16	264.2588587	144.3926547	124	0.546406109	12.96684318	0.049068717	245.5756324	337.5492359	186.5105433	124	0.552543225	16.74914123	0.049619846	313.6843454	Flank	PIAIIITHTEIS
257	63	17	7.538007739	87.74751485	110	11.6406772	8.366397271	1.109895023	-7.636147434	9.163588396	106.6747171	110	11.6411511	10.1710352	1.109940207	-9.282892037	Flank	PIAIIITATEIS
258	63	18	30.01604244	211.6678542	67	7.051824191	25.85934414	0.861517443	-14.43144646	36.92535306	260.4172266	67	7.052531799	31.81502787	0.861603891	-17.7533816	Flank	PIAIIITGTEIS
259	63	19	461.4555469	263.2278286	96	0.570429439	26.86557776	0.058219211	461.1709791	531.6168224	307.5187976	96	0.578459493	31.38600586	0.059038775	531.2889879	Flank	PIAIIITKTEIS
260	63	20	382.9264898	191.583946	103	0.500315207	18.87732712	0.049297522	351.2524098	480.1875915	247.2861364	103	0.514978189	24.36582702	0.050742309	440.4684794	Flank	PIAIIITDDEIS
261	63	21	282.8314506	163.1800633	65	0.576951619	20.23999585	0.071562041	278.6237281	333.7318574	195.107065	65	0.584622237	24.20005303	0.072513464	328.7668826	Flank	PIAIIITDEEIS
262	63	22	173.597931	102.3467706	65	0.589562157	12.69455452	0.073126186	151.6885988	205.2139939	122.750057	65	0.598156367	15.22527075	0.074192166	179.3144826	Flank	PIAIIITDHEIS
263	63	23	29.70976309	68.2877028	98	2.298493683	6.898099674	0.232182924	22.77248816	37.18182624	85.54371702	98	2.300686267	8.641220342	0.232404409	28.49981318	Flank	PIAIIITDYEIS
264	63	24	45.12876772	91.79660119	83	2.034103873	10.075986	0.223271906	29.39813794	61.89757711	126.2889985	83	2.040289853	13.86201847	0.223950906	40.32180806	Flank	PIAIIITDREIS
265	63	25	32.81601432	180.6713988	93	5.505586299	18.73475132	0.570902704	3.598532486	38.28687358	210.8106363	93	5.506081239	21.86004466	0.570954027	4.198454969	Flank	PIAIIITDVEIS
266	63	26	92.15310319	90.3676705	71	0.980625365	10.72466938	0.11637882	75.59857512	111.0481441	109.3919302	71	0.985085623	12.98243363	0.116908155	91.09928122	Flank	PIAIIITDAEIS
267	63	27	-20.60599026	38.28663283	59	-1.858034112	4.984495033	-0.241895438	-25.59652507	-26.33729258	49.04019811	59	-1.86200605	6.384489986	-0.24241254	-32.71588315	Flank	PIAIIITDGEIS
268	63	28	88.94034642	99.04570702	92	1.113619533	10.32622878	0.116102862	69.97885302	114.5898377	128.8653052	92	1.124578827	13.43513681	0.117245448	90.16004244	Flank	PIAIIITDPEIS
269	63	29	-6.176516209	58.7681085	83	-9.514766335	6.45063794	-1.044381286	-3.122808078	-8.444839605	80.36011423	83	-9.515884018	8.820668471	-1.044503967	-4.269658241	Flank	PIAIIITDFEIS
270	63	30	81.96968881	86.77572388	58	1.058631857	11.39421076	0.139005173	86.38497239	106.1437019	113.5022249	58	1.069326045	14.90357228	0.140409389	111.8611146	Flank	PIAIIITDQEIS
271	63	31	33.88542666	81.48318519	58	2.404667529	10.69926639	0.315748315	19.98710285	36.99355941	88.99180219	58	2.405602586	11.6851961	0.315871094	21.82041513	Flank	PIAIIITDTHIS
272	63	32	74.73457773	86.49362378	74	1.157344116	10.05467953	0.134538521	74.62732367	86.61844577	100.6718702	74	1.16224517	11.7028672	0.135108257	86.49413678	Flank	PIAIIITDTLIS
273	63	33	93.97362654	62.58830687	47	0.666019916	9.129442849	0.097148989	78.10279976	111.8968302	75.26994418	47	0.672672711	10.97924977	0.098119399	92.99902588	Flank	PIAIIITDTFIS
274	63	34	193.1302194	126.0025467	90	0.652422739	13.28183462	0.068771395	166.0711945	245.7016057	162.3318479	90	0.660686964	17.1112792	0.069642521	211.2769265	Flank	PIAIIITDTSIS
275	63	35	164.4634859	134.5348136	89	0.818022389	14.26066172	0.0867102	160.1101287	223.9639958	186.0122714	89	0.830545422	19.71726133	0.088037639	218.035657	Flank	PIAIIITDTYIS
276	63	36	23.91776816	88.08450016	59	3.682806003	11.46762515	0.479460503	14.20236034	27.67798049	101.9678259	59	3.684077527	13.27508021	0.479626041	16.43517279	Flank	PIAIIITDTPIS
277	63	37	179.3425605	129.4729966	89	0.721931237	13.72411019	0.076524558	162.747562	212.0473801	154.4732326	89	0.728484514	16.3741299	0.077219204	192.426126	Flank	PIAIIITDTAIS
278	63	38	103.7995151	67.0648283	77	0.64609963	7.642746493	0.073629886	105.5795829	123.2005864	81.58937397	77	0.66224826	9.297972091	0.075470193	125.3133651	Flank	PIAIIITDTGIS
279	63	39	53.85820271	84.51907956	39	1.569288897	13.53388417	0.251287334	54.84418384	67.01023248	105.5442946	39	1.575047433	16.90061304	0.252209438	68.23698758	Flank	PIAIIITDTQIS
280	63	40	251.7683387	231.1990104	60	0.918300576	29.8476639	0.118552095	222.2603474	270.5152312	249.083817	60	0.920775573	32.15658251	0.118871615	238.8100488	Flank	PIAIIITDTDIS
281	63	41	200.2501158	158.0121545	94	0.789073973	16.29770933	0.081386766	181.5435252	232.1225763	184.3160056	94	0.79404601	19.01074442	0.081899593	210.4385839	Flank	PIAIIITDTTIS
282	63	42	203.2008576	163.7764403	66	0.805983017	20.15948622	0.099209651	190.1713854	268.2836767	218.9742039	66	0.816203977	26.95386124	0.100467764	251.0810195	Flank	PIAIIITDTSIS
283	63	43	-31.33804262	42.98804587	77	-1.371752741	4.898942488	-0.156325733	-35.84008823	-38.12644267	52.43010345	77	-1.375163791	5.974964813	-0.156714458	-43.60371468	Flank	PIAIIITDTT(PO4)
284	63	44	-19.95645222	63.74764059	89	-3.194337345	6.757236389	-0.338599081	-24.67595262	-23.25454758	74.32530116	89	-3.196161993	7.878466166	-0.338792494	-28.75401439	Flank	PIAIIITDTS(PO4)
285	63	45	21.73386302	62.54647042	81	2.877834942	6.949607825	0.319759438	22.92127245	26.12974473	75.2602998	81	2.880253924	8.362255534	0.320028214	27.55731907	Flank	PIAIIIFDTEIS
286	63	46	97.0561375	141.4019212	95	1.456908598	14.50753101	0.149475668	124.8872901	144.4725626	211.2898984	95	1.462491525	21.67788618	0.150048465	185.9005242	Flank	PIAIIISDTEIS
287	63	47	68.63958506	86.61729024	93	1.261914538	8.981794591	0.130854442	46.89500573	78.07750698	98.73301959	93	1.264551385	10.2381372	0.13112787	53.34305465	Flank	PIAIIIADTEIS
288	63	48	87.47168325	79.47284981	64	0.908555167	9.934106226	0.113569396	80.62727351	114.2971433	104.7496553	64	0.916467834	13.09370692	0.114558479	105.3537178	Flank	PIAIIIHDTEIS
