# Supplementary material for: Quantitative mapping of protein-peptide affinity landscapes using spectrally encoded beads
Source: eLife journal article supplement (doi:10.7554/elife.40499), 2019-07-08
Supplement: supp [file elife-40499-supp-v1.zip › elife_poa_e40499_Figure_3_source_data_9.csv]

file	code	seq	MED_NORM	SD_NORM	N_NORM	CV_NORM	SEM_NORM	RSEM_NORM
NIR-AKAP79-Core	1	PEAIIITDTEIS	-54.24698864	42.5359021	33	-0.870608802	7.404550131	-0.15155354
NIR-AKAP79-Core	2	PFAIIITDTEIS	-22.0399356	43.65746445	30	-1.822187517	7.970726028	-0.332684402
NIR-AKAP79-Core	3	PHAIIITDTEIS	21.99802109	46.76901445	36	2.162399707	7.794835742	0.360399951
NIR-AKAP79-Core	4	PQAIIITDTEIS	44.00318567	45.74955157	57	1.122260335	6.059676138	0.148647013
NIR-AKAP79-Core	5	PYAIIITDTEIS	-48.94244938	50.31113234	67	-1.310450531	6.146483083	-0.160097013
NIR-AKAP79-Core	6	PAAIIITDTEIS	-17.87730205	254.3059566	39	6.159666347	40.72154333	0.986336
NIR-AKAP79-Core	7	PGAIIITDTEIS	-33.88702956	53.12068415	68	-2.211723632	6.441829167	-0.268210887
NIR-AKAP79-Core	8	PRAIIITDTEIS	20.63718831	73.35329904	56	3.026315519	9.8022469	0.404408422
NIR-AKAP79-Core	9	PPAIIITDTEIS	9.889294298	41.31027333	12	2.943000854	11.92524871	0.849571168
NIR-AKAP79-Core	10	PPKIIITDTEIS	398.3737657	255.5415448	62	0.605044701	32.45380864	0.076840754
NIR-AKAP79-Core	11	PIFIIITDTEIS	-9.407622319	49.37512311	66	-11.60606867	6.07765752	-1.428608297
NIR-AKAP79-Core	12	PIPIIITDTEIS	-69.32442508	47.54326879	64	-0.747271555	5.942908599	-0.093408944
NIR-AKAP79-Core	13	PIQIIITDTEIS	-46.78068911	195.5540209	31	-53.7288398	35.12253898	-9.649984499
NIR-AKAP79-Core	14	PIYIIITDTEIS	-11.86942331	65.0624193	36	-76.34747173	10.84373655	-12.72457862
NIR-AKAP79-Core	15	PIVIIITDTEIS	-30.78603704	76.78582076	25	-15.76369806	15.35716415	-3.152739612
NIR-AKAP79-Core	16	PIIIIITDTEIS	-18.83352139	71.05599301	40	12.00703135	11.23493897	1.89847835
NIR-AKAP79-Core	17	PIKIIITDTEIS	21.72176661	100.3403541	50	2.157627936	14.19026897	0.305134669
NIR-AKAP79-Core	18	PISIIITDTEIS	-1.191272791	174.167418	41	6.518195098	27.20038087	1.017971049
NIR-AKAP79-Core	19	PIGIIITDTEIS	-14.38507798	36.62454747	25	-2.981741536	7.324909495	-0.596348307
NIR-AKAP79-Core	20	PIAFIITDTEIS	-17.0153717	46.83034667	46	-3.718822946	6.904757921	-0.54831053
NIR-AKAP79-Core	21	PIAYIITDTEIS	-40.4863703	34.4793106	65	-0.865292123	4.276632139	-0.107326279
NIR-AKAP79-Core	22	PIALIITDTEIS	-17.25630341	29.73675229	51	-1.406744974	4.163978199	-0.196983697
NIR-AKAP79-Core	23	PIAAIITDTEIS	33.49240426	76.27859607	57	1.590815841	10.10334687	0.210708705
NIR-AKAP79-Core	24	PIAVIITDTEIS	35.98086869	81.91601451	19	1.453408833	18.79282258	0.333434854
NIR-AKAP79-Core	25	PIAGIITDTEIS	-15.93517323	61.97034607	52	-18.26267006	8.593740781	-2.532576667
NIR-AKAP79-Core	26	PIAIHITDTEIS	23.0910279	61.10269841	45	2.102048115	9.108652484	0.313354832
NIR-AKAP79-Core	27	PIAIYITDTEIS	-34.30150625	42.69127277	80	-1.381811456	4.773029398	-0.154491217
NIR-AKAP79-Core	28	PIAIFITDTEIS	-9.048897585	44.05006562	59	-8.531698189	5.734830071	-1.110732496
NIR-AKAP79-Core	29	PIAIQITDTEIS	42.31491702	84.88889371	43	1.332287306	12.94543493	0.203171909
NIR-AKAP79-Core	30	PIAIEITDTEIS	-33.13467059	47.1569823	52	-1.504159446	6.539496834	-0.208589385
NIR-AKAP79-Core	31	PIAILITDTEIS	-46.43263946	36.04971928	34	-0.749088479	6.182475851	-0.128467614
NIR-AKAP79-Core	32	PIAIIITDTEIS	-23.77635915	48.43075532	40	-2.527459184	7.657574781	-0.399626386
NIR-AKAP79-Core	33	SCRAMBLED	-104.052779	47.01384532	72	-0.504555493	5.540634806	-0.059462435
NIR-AKAP79-Core	34	PIAIAITDTEIS	69.16090059	62.1914761	40	0.940872581	9.833335777	0.148765017
NIR-AKAP79-Core	35	PIAIIDTDTEIS	-17.06460148	53.98369867	14	-7.408883292	14.42775035	-1.98010735
NIR-AKAP79-Core	36	PIAIIFTDTEIS	-23.45134247	102.9814826	52	214.8276754	14.28096215	29.79123843
NIR-AKAP79-Core	37	PIAIIHTDTEIS	24.8149333	50.89702212	43	2.182312928	7.761723107	0.332799601
NIR-AKAP79-Core	38	PIAIILTDTEIS	30.39748933	1027.150825	83	3.045977275	112.7444502	0.334339442
NIR-AKAP79-Core	39	PIAIIRTDTEIS	67.65037709	58.98574563	96	0.804059153	6.020207454	0.082063944
NIR-AKAP79-Core	40	PIAIISTDTEIS	38.05747542	67.81755144	14	1.475207865	18.12500302	0.394265886
NIR-AKAP79-Core	41	PIAIIQTDTEIS	57.52331569	91.65050518	39	1.112432925	14.67582619	0.178131831
NIR-AKAP79-Core	42	PIAIIATDTEIS	50.7805966	55.05358919	25	1.133241932	11.01071784	0.226648386
NIR-AKAP79-Core	43	PIAIIGTDTEIS	23.49147607	100.4412166	34	2.109541719	17.22552654	0.36178342
NIR-AKAP79-Core	44	PIAIIYTDTEIS	-57.94253685	72.0098907	31	-1.930595665	12.93335817	-0.346745217
NIR-AKAP79-Core	45	PIAIIIEDTEIS	44.09719291	38.9653519	22	1.051955395	8.307440937	0.224277644
NIR-AKAP79-Core	46	PIAIIIQDTEIS	-6.840258974	440.8949865	19	4.532539696	101.1482469	1.039835921
NIR-AKAP79-Core	47	PIAIIIRDTEIS	110.2966747	84.29432809	26	0.671638182	16.53147784	0.131719084
NIR-AKAP79-Core	48	PIAIIIIDTEIS	-23.47588409	194.3406587	38	10.91887279	31.52621783	1.771275061
NIR-AKAP79-Flank	1	PIAIIITDTEIS	-56.80160556	42.56168553	58	-0.813413889	5.588623104	-0.106806476
NIR-AKAP79-Flank	2	SCRAMBLED	-118.7319735	55.84572881	86	-0.497695955	6.02199981	-0.053667935
NIR-AKAP79-Flank	3	HIAIIITDTEIS	-78.6443072	63.62795668	106	-0.947890824	6.180093477	-0.092067296
NIR-AKAP79-Flank	4	LIAIIITDTEIS	52.18250701	67.29139095	70	1.126071302	8.042859563	0.134591264
NIR-AKAP79-Flank	5	RIAIIITDTEIS	-76.68848134	42.43149956	61	-0.624187539	5.432796815	-0.079919025
NIR-AKAP79-Flank	6	YIAIIITDTEIS	-17.75416106	67.13529458	72	-3.258439855	7.911970343	-0.38401082
NIR-AKAP79-Flank	7	AIAIIITDTEIS	-23.78288658	54.68798538	60	-2.989752831	7.060188553	-0.385975431
NIR-AKAP79-Flank	8	NIAIIITDTEIS	-83.46827349	61.86142386	92	-0.886988782	6.449499274	-0.092474973
NIR-AKAP79-Flank	9	TIAIIITDTEIS	108.391502	75.37460862	3	0.892753767	43.51755058	0.515431627
NIR-AKAP79-Flank	10	PIAIIITQTEIS	260.4631736	140.1448468	50	0.547856762	19.81947431	0.077478646
NIR-AKAP79-Flank	11	PIAIIITETEIS	-32.56592676	57.6240037	75	-2.050696635	6.653846809	-0.236794051
NIR-AKAP79-Flank	12	PIAIIITFTEIS	96.83452649	883.5701752	53	3.863620107	121.3676976	0.530709037
NIR-AKAP79-Flank	13	PIAIIITYTEIS	109.0593153	787.6571546	106	4.10582663	76.50402586	0.398793136
NIR-AKAP79-Flank	14	PIAIIITRTEIS	1867.733757	942.0482845	88	0.48124791	100.4226845	0.0513012
NIR-AKAP79-Flank	15	PIAIIITLTEIS	72.05536717	97.44294157	115	1.211153058	9.086601154	0.112940605
NIR-AKAP79-Flank	16	PIAIIITHTEIS	421.0880337	284.0592157	111	0.656848851	26.96170758	0.062345334
NIR-AKAP79-Flank	17	PIAIIITATEIS	-50.14774881	71.10137782	95	-1.879235478	7.294847445	-0.192805492
NIR-AKAP79-Flank	18	PIAIIITGTEIS	-108.5798548	55.62789314	49	-0.538819584	7.946841877	-0.076974226
NIR-AKAP79-Flank	19	PIAIIITKTEIS	1034.871353	822.6842276	106	0.740938543	79.90615595	0.071966313
NIR-AKAP79-Flank	20	PIAIIITDDEIS	-23.32980115	54.90231369	86	-3.466751598	5.92026874	-0.373829439
NIR-AKAP79-Flank	21	PIAIIITDEEIS	-64.19916101	37.15386537	47	-0.538179637	5.419448257	-0.078501568
NIR-AKAP79-Flank	22	PIAIIITDHEIS	-44.18978037	52.16095541	52	-1.664402239	7.23342305	-0.230811062
NIR-AKAP79-Flank	23	PIAIIITDYEIS	-80.87877058	60.56574689	80	-0.850525097	6.771456357	-0.095091597
NIR-AKAP79-Flank	24	PIAIIITDREIS	9.633445283	100.7671697	59	5.313246457	13.11876809	0.69172577
NIR-AKAP79-Flank	25	PIAIIITDVEIS	-56.63753617	55.86823557	86	-0.988591563	6.024426775	-0.10660257
NIR-AKAP79-Flank	26	PIAIIITDAEIS	-54.01176456	55.17744505	75	-1.20918132	6.371342551	-0.139624232
NIR-AKAP79-Flank	27	PIAIIITDGEIS	-105.6785522	37.74965082	48	-0.364339601	5.448692765	-0.052587892
NIR-AKAP79-Flank	28	PIAIIITDPEIS	-79.119463	65.5331117	83	-0.936238299	7.19319351	-0.102765504
NIR-AKAP79-Flank	29	PIAIIITDFEIS	-90.20109152	53.15388418	86	-0.654966495	5.731730738	-0.070626853
NIR-AKAP79-Flank	30	PIAIIITDQEIS	-83.9850111	213.4787516	56	-4.785233701	28.52729814	-0.639453751
NIR-AKAP79-Flank	31	PIAIIITDTHIS	17.65278797	59.39912773	58	2.579981949	7.799487577	0.338768227
NIR-AKAP79-Flank	32	PIAIIITDTLIS	102.8898031	105.2168703	66	0.987987467	12.95130144	0.12161285
NIR-AKAP79-Flank	33	PIAIIITDTFIS	192.4712212	107.035265	65	0.582120419	13.27609069	0.072203152
NIR-AKAP79-Flank	34	PIAIIITDTSIS	16.30726367	140.1854191	83	4.503222796	15.38734879	0.494292918
NIR-AKAP79-Flank	35	PIAIIITDTYIS	196.7426057	214.3207403	84	1.03541253	23.38430989	0.112972769
NIR-AKAP79-Flank	36	PIAIIITDTPIS	-16.14003599	148.9754	69	53.38376303	17.93453062	6.426649853
NIR-AKAP79-Flank	37	PIAIIITDTAIS	37.09324296	108.6729323	59	1.744134683	14.14801071	0.227066995
NIR-AKAP79-Flank	38	PIAIIITDTGIS	-3.551798547	46.46342042	64	-8.572508196	5.807927553	-1.071563524
NIR-AKAP79-Flank	39	PIAIIITDTQIS	30.34538109	78.4611177	28	2.201404213	14.8277575	0.416026292
NIR-AKAP79-Flank	40	PIAIIITDTDIS	-55.11439138	60.2357598	51	-1.294628289	8.434693479	-0.181284221
NIR-AKAP79-Flank	41	PIAIIITDTTIS	126.0999384	125.524653	72	1.135898351	14.79322222	0.133866904
NIR-AKAP79-Flank	42	PIAIIITDTSIS	61.8073145	140.8987772	67	2.885228568	17.21352532	0.352486771
NIR-AKAP79-Flank	43	PIAIIITDTZ	-92.23593875	83.44075871	85	-1.222378896	9.050420994	-0.132585607
NIR-AKAP79-Flank	44	PIAIIITDTX	-91.11991293	120.9661328	65	-1.319921921	15.00400217	-0.163716165
NIR-AKAP79-Flank	45	PIAIIIFDTEIS	0.967811719	120.0626567	61	18.90921262	15.37244796	2.421076586
NIR-AKAP79-Flank	46	PIAIIISDTEIS	-33.42414169	363.3358861	67	41.44535853	44.38854331	5.063356423
NIR-AKAP79-Flank	47	PIAIIIADTEIS	-67.20815447	158.3583458	90	-8.759832384	16.69243531	-0.923367408
NIR-AKAP79-Flank	48	PIAIIIHDTEIS	-27.29828524	85.38505655	71	-10.11351227	10.1333419	-1.200253086
NIR-NFATc2-Core	1	SFRIEITPSHEL	-10.4437823	51.89511471	48	52.09411297	7.490414612	7.519137536
NIR-NFATc2-Core	2	SHRIEITPSHEL	-4.258210699	54.42521788	60	11.2641835	7.026265415	1.454199836
NIR-NFATc2-Core	3	SLRIEITPSHEL	-4.377268402	43.00748857	72	13.40552475	5.068481135	1.579856243
NIR-NFATc2-Core	4	SYRIEITPSHEL	-7.814491709	7.794047207	32	-1.086386517	1.377805908	-0.192047818
NIR-NFATc2-Core	5	SKRIEITPSHEL	3.311514825	44.8500913	66	3.95134856	5.520664608	0.486377386
NIR-NFATc2-Core	6	SARIEITPSHEL	-8.777027675	36.6787325	66	-11.93039638	4.514839871	-1.468530278
NIR-NFATc2-Core	7	SPEIEITPSHEL	-16.87136082	11.30545698	55	-0.648451838	1.524427508	-0.087437228
NIR-NFATc2-Core	8	SPGIEITPSHEL	-15.03538062	12.99062058	76	-0.818700215	1.490126377	-0.093911355
NIR-NFATc2-Core	9	SPLIEITPSHEL	-4.626824228	125.738118	48	-21.26587927	18.14873406	-3.06946528
NIR-NFATc2-Core	10	SPVIEITPSHEL	-6.462255305	228.5008658	77	-9.017108838	26.04009039	-1.027594921
NIR-NFATc2-Core	11	SPYIEITPSHEL	7.902697828	63.41331937	43	2.315213208	9.670440543	0.353066704
NIR-NFATc2-Core	12	SPKIEITPSHEL	-11.73032254	11.3427833	63	-1.012207859	1.429056371	-0.127526203
NIR-NFATc2-Core	13	SPSIEITPSHEL	-14.46235354	37.92545375	82	-4.600285297	4.188165734	-0.508016526
NIR-NFATc2-Core	14	SPAIEITPSHEL	-13.93876782	17.75682245	64	-1.49559499	2.219602806	-0.186949374
NIR-NFATc2-Core	15	SPRFEITPSHEL	-7.290626405	10.74556949	69	-1.870666406	1.29361455	-0.225201771
NIR-NFATc2-Core	16	SPRHEITPSHEL	-7.705316928	12.90309619	58	-1.49030849	1.694259533	-0.195687092
NIR-NFATc2-Core	17	SPRLEITPSHEL	-10.60029765	13.63396209	72	-1.306505925	1.606777842	-0.1539732
NIR-NFATc2-Core	18	SPRYEITPSHEL	-7.398533218	15.51083745	70	-2.095550266	1.853899668	-0.250466163
NIR-NFATc2-Core	19	SPRAEITPSHEL	-15.06615169	40.87927008	60	-3.713566967	5.277491075	-0.479419434
NIR-NFATc2-Core	20	SPRKEITPSHEL	-9.534405574	18.47585714	56	-1.653123481	2.468940263	-0.220907917
NIR-NFATc2-Core	21	SPRIDITPSHEL	-11.08794661	29.5503105	89	-3.035419489	3.132326648	-0.321753822
NIR-NFATc2-Core	23	SPRIHITPSHEL	446.1407828	590.910561	76	0.92486189	67.78209	0.106088935
NIR-NFATc2-Core	24	SPRINITPSHEL	11.72570453	16.90046004	59	1.245346918	2.200252488	0.162130359
NIR-NFATc2-Core	25	SPRIFITPSHEL	170.3810989	90.75367686	48	0.475609183	13.09916494	0.068648272
NIR-NFATc2-Core	26	SPRIVITPSHEL	120.1370488	1494.60177	56	-23.15766638	199.7245627	-3.094573338
NIR-NFATc2-Core	27	SPRILITPSHEL	304.9917695	348.3688651	53	0.871798153	47.85214377	0.119750686
NIR-NFATc2-Core	28	SPRIAITPSHEL	10.65443714	357.2108322	72	-11.79168668	42.09770029	-1.389663602
NIR-NFATc2-Core	29	SPRIGITPSHEL	-0.260309754	22.97560199	72	-11.71118807	2.707700661	-1.380176751
NIR-NFATc2-Core	30	SPRIEETPSHEL	-14.38679114	32.29989931	59	-3.618894992	4.205088716	-0.471139998
NIR-NFATc2-Core	31	SPRIEFTPSHEL	-7.647513015	92.96029938	47	-4.636734425	13.55965328	-0.676337227
NIR-NFATc2-Core	32	SPRIEHTPSHEL	-13.25856179	46.40915062	57	-7.019625762	6.147042166	-0.929772146
NIR-NFATc2-Core	33	SPRIEQTPSHEL	-12.89623025	64.42638604	52	-10.62072478	8.934332245	-1.47282953
NIR-NFATc2-Core	34	SPRIERTPSHEL	0.077633125	11.89650722	60	32.45155067	1.535832479	4.189477176
NIR-NFATc2-Core	35	SPRIEYTPSHEL	-7.577696565	15.35790368	66	-2.303251637	1.890427262	-0.283510678
NIR-NFATc2-Core	36	SPRIEATPSHEL	-9.172983063	12.31168173	60	-1.508356159	1.589431277	-0.194727943
NIR-NFATc2-Core	37	SPRIEITPSHEL	-14.42975409	10.62555312	43	-0.848923641	1.62038166	-0.129459642
NIR-NFATc2-Core	38	SPRIEISPSHEL	-9.911147103	14.66710956	61	-1.36314967	1.877930946	-0.174533431
NIR-NFATc2-Core	39	SPRIEIEPSHEL	-12.9921112	49.59435294	43	-8.426532102	7.56306792	-1.285034098
NIR-NFATc2-Core	40	SPRIEIFPSHEL	0.205764304	8.290516266	43	77.64272679	1.264291878	11.84040483
NIR-NFATc2-Core	41	SPRIEIHPSHEL	11.30717975	54.0017138	51	3.605461015	7.561752433	0.504865525
NIR-NFATc2-Core	42	SPRIEIKPSHEL	-1.693821207	8.906457853	53	-3.422491059	1.223396074	-0.470115302
NIR-NFATc2-Core	43	SPRIEILPSHEL	-6.352872491	10.31109322	47	-1.548870752	1.504027524	-0.225926019
NIR-NFATc2-Core	44	SPRIEIYPSHEL	6.803449686	13.56399259	36	1.47494054	2.260665432	0.245823423
NIR-NFATc2-Core	45	SPRIEINPSHEL	-13.24517298	11.58243046	37	-0.796767333	1.904139837	-0.130987743
NIR-NFATc2-Core	46	SPRIEIAPSHEL	-12.10689298	11.97848095	54	-1.194770191	1.630064789	-0.162587629
NIR-NFATc2-Core	47	Scrambled	-14.66490717	9.781513598	51	-0.790416267	1.369685868	-0.110680416
NIR-NFATc2-Core	48	SPRIEIPPSHEL	-14.15116077	21.77728604	47	-2.061040639	3.176543643	-0.300633675
NIR-NFATc2-Flank	1	SPRIEITPSHEL	-149.8713183	55.64029081	132	-0.378350903	4.842865701	-0.032931219
NIR-NFATc2-Flank	2	Scrambled	-214.674744	58.30384657	125	-0.271942415	5.214854571	-0.024323269
NIR-NFATc2-Flank	3	FPRIEITPSHEL	33.20713686	176.8741964	97	2.596070489	17.9588537	0.263591022
NIR-NFATc2-Flank	4	HPRIEITPSHEL	12.12390725	54.16262911	51	2.006321158	7.584285084	0.280941156
NIR-NFATc2-Flank	5	LPRIEITPSHEL	-99.44572489	57.98930381	88	-0.659438807	6.181680557	-0.070296413
NIR-NFATc2-Flank	6	YPRIEITPSHEL	353.6805558	283.9477123	99	0.654008136	28.53781884	0.065730291
NIR-NFATc2-Flank	7	APRIEITPSHEL	-118.6958996	53.34311694	122	-0.485929816	4.829458888	-0.043994018
NIR-NFATc2-Flank	8	QPRIEITPSHEL	-119.8673189	173.6575052	114	-1.672919444	16.26451555	-0.156683262
NIR-NFATc2-Flank	9	KPRIEITPSHEL	76.0893373	106.9802552	86	1.082612319	11.5359776	0.116741089
NIR-NFATc2-Flank	10	DPRIEITPSHEL	-201.3777301	48.6737179	148	-0.250777739	4.000954966	-0.020613803
NIR-NFATc2-Flank	11	GPRIEITPSHEL	-109.6000307	154.2164686	114	-1.740579906	14.44369564	-0.163020244
NIR-NFATc2-Flank	12	SPRIEITGSHEL	-159.4640357	187.7696962	120	-1.384907711	17.14094971	-0.126424199
NIR-NFATc2-Flank	13	SPRIEITFSHEL	-106.449106	120.5064104	131	-1.327039796	10.52869396	-0.115944005
NIR-NFATc2-Flank	14	SPRIEITHSHEL	-93.9024223	69.23186669	108	-0.841059933	6.661839478	-0.08093103
NIR-NFATc2-Flank	15	SPRIEITKSHEL	-4.70417833	171.4768277	78	7.802940258	19.41592739	0.883509005
NIR-NFATc2-Flank	16	SPRIEITQSHEL	-92.83654579	141.066292	141	-1.871352363	11.87992488	-0.157596299
NIR-NFATc2-Flank	17	SPRIEITYSHEL	-123.0934714	123.652635	149	-1.141472502	10.13001856	-0.093513071
NIR-NFATc2-Flank	18	SPRIEITNSHEL	-74.88581392	163.4430883	79	-3.356602022	18.38878411	-0.377647232
NIR-NFATc2-Flank	19	SPRIEITASHEL	-100.9161248	131.0809171	112	-1.489193072	12.38598244	-0.140715519
NIR-NFATc2-Flank	20	SPRIEITGSHEL	-155.3084106	47.11490657	106	-0.309033014	4.576204266	-0.03001594
NIR-NFATc2-Flank	21	SPRIEITPEHEL	-216.0898961	62.41474958	105	-0.287180542	6.091055867	-0.028025951
NIR-NFATc2-Flank	22	SPRIEITPFHEL	-34.07170207	51.17204886	74	-1.655654278	5.94862985	-0.1924659
NIR-NFATc2-Flank	23	SPRIEITPHHEL	6.861201483	183.490655	25	3.595138592	36.698131	0.719027718
NIR-NFATc2-Flank	24	SPRIEITPLHEL	-106.0943758	46.3352199	123	-0.43209398	4.17790608	-0.038960602
NIR-NFATc2-Flank	25	SPRIEITPQHEL	-122.7763583	146.3800358	155	-1.387451552	11.75752741	-0.11144279
NIR-NFATc2-Flank	26	SPRIEITPKHEL	-20.30452456	143.8147186	119	153.9943485	13.18347364	14.11663878
NIR-NFATc2-Flank	27	SPRIEITPRHEL	453.6350031	372.7345702	112	0.72892967	35.22010635	0.06887738
NIR-NFATc2-Flank	28	SPRIEITPPHEL	-116.7955545	166.3325649	101	-1.593270039	16.5507088	-0.158536294
NIR-NFATc2-Flank	29	SPRIEITPVHEL	-113.8822036	62.87238338	49	-0.522887566	8.981769055	-0.074698224
NIR-NFATc2-Flank	30	SPRIEITPAHEL	-237.8701062	72.08553644	80	-0.31895656	8.059407984	-0.035660428
NIR-NFATc2-Flank	31	SPRIEITPGHEL	-165.0831866	62.629817	85	-0.397250564	6.793157438	-0.043087873
NIR-NFATc2-Flank	32	SPRIEITPTHEL	-179.3835627	60.64038018	105	-0.35477701	5.917895144	-0.034622691
NIR-NFATc2-Flank	33	SPRIEITPDHEL	-169.511479	145.7176985	101	-0.961918782	14.49945293	-0.095714496
NIR-NFATc2-Flank	34	SPRIEITPSDEL	-184.9573543	48.60445027	116	-0.262502872	4.512809915	-0.02437278
NIR-NFATc2-Flank	35	SPRIEITPSEEL	-216.8763356	59.06472655	114	-0.272101785	5.531918485	-0.025484667
NIR-NFATc2-Flank	36	SPRIEITPSFEL	-145.3031677	230.3596886	103	-1.888867029	22.69801457	-0.186115599
NIR-NFATc2-Flank	37	SPRIEITPSYEL	-160.4683798	65.4097774	95	-0.437201599	6.710901563	-0.044855938
NIR-NFATc2-Flank	38	SPRIEITPSVEL	-171.0595148	58.29823004	101	-0.34749126	5.800890702	-0.034576673
NIR-NFATc2-Flank	39	SPRIEITPSQEL	-172.9287441	170.8642421	108	-1.121997828	16.44141937	-0.107964291
NIR-NFATc2-Flank	40	SPRIEITPSPEL	-163.1998666	45.04114006	85	-0.282691523	4.885397567	-0.030662201
NIR-NFATc2-Flank	41	SPRIEITPSAEL	-211.871605	228.1241623	100	-1.221272991	22.81241623	-0.122127299
NIR-NFATc2-Flank	42	SPRIEITPSGEL	-184.8815833	192.6937541	109	-1.220531271	18.45671427	-0.116905693
NIR-NFATc2-Flank	43	SPRIEITPSTEL	-197.4219855	215.4925094	110	-1.292229235	20.5464046	-0.123209223
NIR-NFATc2-Flank	44	SPRIEITPSSEL	-181.4195353	55.06456659	94	-0.304588321	5.67947639	-0.031415887
NIR-NFATc2-Flank	45	SPRIEITPSZEL	-161.9414688	56.81542202	97	-0.369731726	5.768732087	-0.037540569
NIR-NFATc2-Flank	46	SPRIEITPSXEL	-214.0735535	256.8197262	96	-1.436127871	26.21155354	-0.146574187
NIR-NFATc2-Flank	47	SPRIEIGPSHEL	-165.4057777	272.9683831	86	-2.455373887	29.43493774	-0.264769775
NIR-NFATc2-Flank	48	SPRIEGTPSHEL	-190.0857792	245.8793001	74	-1.644412687	28.58288805	-0.191159092
NIR-PKIVIT-Core	2	HPKVVITGPH	-47.42117274	59.50285737	27	-1.875799913	11.45133024	-0.360997862
NIR-PKIVIT-Core	3	HPKTVITGPH	-10.94026578	63.9344897	34	122.4603749	10.96467453	21.00178104
NIR-PKIVIT-Core	4	HPKMVITGPH	-29.75015323	84.728311	27	-7.940228725	16.30597105	-1.528097731
NIR-PKIVIT-Core	5	HPKIVITGPH	-38.40948076	83.85883983	32	-4.063967529	14.82428858	-0.71841475
NIR-PKIVIT-Core	6	Scrambled	-118.1391383	57.5473279	23	-0.528709006	11.99944736	-0.110243449
NIR-PKIVIT-Core	7	HPKIFITGPH	140.354957	79.25662095	53	0.522121153	10.88673415	0.071718856
NIR-PKIVIT-Core	8	HPKIYITGPH	35.44395824	74.46179552	24	1.671886883	15.19945036	0.341272481
NIR-PKIVIT-Core	9	HPKIRITGPH	759.3239258	260.2501857	38	0.326267102	42.21815498	0.052927513
NIR-PKIVIT-Core	10	HPKIMITGPH	-88.73011359	43.0262458	35	-0.584118096	7.272762941	-0.098733979
NIR-PKIVIT-Core	11	HPKIGITGPH	9.076540759	531.259095	40	4.050304324	83.9994384	0.640409344
NIR-PKIVIT-Core	12	HPKIIITGPH	11.84084035	56.95578192	24	2.852124751	11.6260503	0.582187527
NIR-PKIVIT-Core	13	HPKIQITGPH	-40.96877671	36.68762547	40	-0.98155628	5.800822921	-0.155197675
NIR-PKIVIT-Core	14	HPKILITGPH	13.73950467	36.22002947	17	14.62081689	8.784647487	3.546068963
NIR-PKIVIT-Core	15	HPKIEITGPH	-70.74658338	24.8493206	19	-0.375407077	5.700825121	-0.08612429
NIR-PKIVIT-Core	16	HPKISITGPH	-18.56638956	60.76289292	24	-4.775326939	12.40317358	-0.97475953
NIR-PKIVIT-Core	17	HPKIKITGPH	191.9361363	125.9887526	23	0.574298277	26.27047093	0.119749469
NIR-PKIVIT-Core	18	HPKIAITGPH	-52.46106026	40.73456206	30	-0.841445058	7.437079504	-0.153626146
NIR-PKIVIT-Core	19	HPKIHITGPH	-0.394484116	82.26396524	31	4.331803406	14.77504432	0.778014859
NIR-PKIVIT-Core	20	HPKIVDTGPH	-74.55517856	49.00261643	33	-0.691086307	8.530260604	-0.120302684
NIR-PKIVIT-Core	21	HPKIVRTGPH	163.5208921	131.0915182	30	0.674729889	23.93392721	0.12318826
NIR-PKIVIT-Core	22	HPKIVQTGPH	-70.99562698	39.01083683	30	-0.554697122	7.122371773	-0.101273375
NIR-PKIVIT-Core	23	HPKIVETGPH	-62.98353669	45.84847813	31	-0.713320356	8.234629763	-0.128116118
NIR-PKIVIT-Core	24	HPKIVVTGPH	-70.87584002	48.77574197	26	-0.801171981	9.565710003	-0.157122753
NIR-PKIVIT-Core	25	HPKIVLTGPH	-38.12908616	46.8970629	41	-1.404125485	7.324090735	-0.219287559
NIR-PKIVIT-Core	26	HPKIVHTGPH	-36.34324943	39.61927001	23	-1.359288629	8.261188872	-0.283431272
NIR-PKIVIT-Core	27	HPKIVATGPH	-70.42675991	35.25870289	16	-0.526485077	8.814675722	-0.131621269
NIR-PKIVIT-Core	28	HPKIVGTGPH	-90.8713724	39.06365736	25	-0.429264912	7.812731472	-0.085852982
NIR-PKIVIT-Core	29	HPKIVYTGPH	-45.06363537	17.22250726	13	-0.400561261	4.776664078	-0.111095705
NIR-PKIVIT-Core	30	HPKIVSTGPH	-59.74951246	37.49025844	12	-0.608115124	10.8225054	-0.175547715
NIR-PKIVIT-Core	31	HPKIVKTGPH	-21.51052947	63.37953314	26	-3.540015655	12.42974909	-0.694254189
NIR-PKIVIT-Core	32	HPKIVIEGPH	-88.6169443	37.68964856	28	-0.409349203	7.122674078	-0.077359728
NIR-PKIVIT-Core	33	HPKIVIHGPH	-14.8051993	45.27619969	29	-26.52220999	8.407579212	-4.925050754
NIR-PKIVIT-Core	34	HPKIVIDGPH	-112.5551846	33.8660733	20	-0.313145039	7.572684202	-0.070021359
NIR-PKIVIT-Core	35	HPKIVIQGPH	-64.14389867	29.92126704	26	-0.420100727	5.868043251	-0.082388531
NIR-PKIVIT-Core	36	HPKIVISGPH	-44.81492451	39.57956009	17	-0.979004098	9.599453344	-0.237443371
NIR-PKIVIT-Core	37	HPKIVIRGPH	477.2127318	184.1975338	37	0.368238565	30.28188802	0.060538047
NIR-PKIVIT-Core	38	HPKIVIVGPH	0.741386098	49.47843601	25	3.715119885	9.895687201	0.743023977
NIR-PKIVIT-Core	39	HPKIVIFGPH	2.650699085	43.79795618	18	10.8987885	10.32327727	2.568869084
NIR-PKIVIT-Core	41	HPKIVIAGPH	-30.08462795	69.7530622	22	-4.168650882	14.87140283	-0.888759354
NIR-PKIVIT-Core	42	HPKIVIGGPH	-65.76602461	45.55421906	23	-0.751538471	9.498711296	-0.156706604
NIR-PKIVIT-Core	43	HPKIVIIGPH	2.111185952	44.19851634	29	3.043771179	8.207458438	0.565214118
NIR-PKIVIT-Core	44	HPKIVIKGPH	70.02268724	56.50366432	28	0.794662114	10.67818885	0.150177023
NIR-PKIVIT-Core	45	HPKIVILGPH	109.7137437	53.94958546	23	0.490430244	11.2492662	0.102261775
NIR-PKIVIT-Core	46	HPKIVIMGPH	-39.4876966	68.17886773	25	-1.272658036	13.63577355	-0.254531607
NIR-PKIVIT-Core	47	HPKIVINGPH	-6.381931008	55.49486348	18	-13.04744218	13.08026476	-3.075311614
NIR-PKIVIT-Flank	1	HPKIVITGPH	174.1432169	117.0507179	13	0.616033854	32.46402808	0.17085705
NIR-PKIVIT-Flank	2	Scrambled	-79.61284522	28.47690907	38	-0.397635195	4.619564659	-0.064504946
NIR-PKIVIT-Flank	3	FPKIVITGPH	-47.08739353	50.41118186	31	-1.101221316	9.054115543	-0.197785187
NIR-PKIVIT-Flank	4	YPKIVITGPH	-20.7467152	77.33435206	33	7.72636908	13.46218273	1.344988219
NIR-PKIVIT-Flank	5	IPKIVITGPH	-8.673833795	37.08725198	27	10.15366402	7.137444971	1.954073552
NIR-PKIVIT-Flank	6	VPKIVITGPH	-9.90205106	37.67119671	28	-3.896936763	7.119187007	-0.736451825
NIR-PKIVIT-Flank	7	TPKIVITGPH	1.048865703	57.48224875	31	5.868802789	10.32411665	1.054068098
NIR-PKIVIT-Flank	8	QPKIVITGPH	61.04524429	102.8734663	26	1.334051559	20.17514661	0.261629036
NIR-PKIVIT-Flank	9	APKIVITGPH	-57.63725162	38.76672987	33	-0.701923901	6.748421464	-0.122189267
NIR-PKIVIT-Flank	10	GPKIVITGPH	-49.02022425	43.94744237	39	-1.04148094	7.037222811	-0.16677042
NIR-PKIVIT-Flank	11	NPKIVITGPH	14.72531031	303.403477	31	3.586271957	54.49287312	0.644113458
NIR-PKIVIT-Flank	12	EPKIVITGPH	-122.0740675	40.23534393	32	-0.334666757	7.112671134	-0.059161283
NIR-PKIVIT-Flank	13	RPKIVITGPH	520.3244138	215.1706025	36	0.395683262	35.86176709	0.06594721
NIR-PKIVIT-Flank	14	HPKIVITHPH	185.1039804	97.54275374	15	0.455334902	25.18543072	0.117566966
NIR-PKIVIT-Flank	15	HPKIVITSPH	149.1534559	105.6372816	12	0.671212187	30.49485649	0.193762269
NIR-PKIVIT-Flank	16	HPKIVITTPH	83.1638497	110.0277966	32	1.106310159	19.45035027	0.195569854
NIR-PKIVIT-Flank	17	HPKIVITAPH	100.6529174	79.09901983	28	0.661372119	14.94830967	0.124987582
NIR-PKIVIT-Flank	18	HPKIVITDPH	76.15183226	55.79023977	24	0.642404809	11.38813501	0.131130332
NIR-PKIVIT-Flank	19	HPKIVITNPH	145.863776	68.31745161	33	0.485787017	11.89254184	0.084564665
NIR-PKIVIT-Flank	20	HPKIVITKPH	451.3398846	831.1600132	46	1.410906621	122.5478582	0.208026832
NIR-PKIVIT-Flank	22	HPKIVITEPH	70.4243288	59.0397395	29	0.701126487	10.96340439	0.13019592
NIR-PKIVIT-Flank	23	HPKIVITGFH	-42.76551858	126.5161383	37	-8.812493338	20.79912502	-1.44876498
NIR-PKIVIT-Flank	24	HPKIVITGDH	75.83269539	90.37100257	33	1.093286036	15.73157229	0.19031667
NIR-PKIVIT-Flank	25	HPKIVITGYH	-49.11164552	44.34666471	25	-1.037307901	8.869332941	-0.20746158
NIR-PKIVIT-Flank	26	HPKIVITGIH	-45.7703058	94.00653478	20	-6.086206893	21.02050021	-1.360917234
NIR-PKIVIT-Flank	27	HPKIVITGVH	-38.19258894	87.64624572	39	-4.082483187	14.03463152	-0.653720496
NIR-PKIVIT-Flank	28	HPKIVITGLH	-14.22291238	65.54453752	44	-8.269176932	9.881210818	-1.246625328
NIR-PKIVIT-Flank	29	HPKIVITGEH	-41.86919313	42.67233291	17	-1.428492902	10.34956093	-0.346460419
NIR-PKIVIT-Flank	30	HPKIVITGSH	-32.84878802	43.31737358	18	-1.433995209	10.21000287	-0.337995912
NIR-PKIVIT-Flank	31	HPKIVITGTH	17.73920654	52.15430112	25	10.3930818	10.43086022	2.078616359
NIR-PKIVIT-Flank	32	HPKIVITGRH	431.6935987	179.6232089	24	0.399954253	36.66543399	0.08164032
NIR-PKIVIT-Flank	33	HPKIVITGAH	-3.629370139	77.03594909	28	13.23221759	14.55842595	2.500654073
NIR-PKIVIT-Flank	34	HPKIVITGPT	14.53772697	53.98844506	41	3.487713865	8.431578564	0.544689395
NIR-PKIVIT-Flank	35	HPKIVITGPF	-36.29917681	264.2460613	21	9.720083689	57.66321801	2.121096156
NIR-PKIVIT-Flank	36	HPKIVITGPD	-12.904994	218.7319907	25	5.907222046	43.74639813	1.181444409
NIR-PKIVIT-Flank	37	HPKIVITGPA	44.85500998	72.36921953	27	1.185670759	13.92746279	0.228182444
NIR-PKIVIT-Flank	38	HPKIVITGPG	101.6818495	46.57015255	21	0.415184741	10.16244044	0.090600738
NIR-PKIVIT-Flank	39	HPKIVITGPI	70.36796718	70.7961824	27	0.821004412	13.62473165	0.158002373
NIR-PKIVIT-Flank	40	HPKIVITGPQ	81.991219	111.4580111	26	0.867731831	21.85871437	0.170176213
NIR-PKIVIT-Flank	41	HPKIVITGPV	29.02549869	65.57298818	23	2.367204068	13.67291321	0.493596169
NIR-PKIVIT-Flank	42	HPKIVITGPY	-23.36643354	164.5039998	27	4.935740709	31.65880952	0.949883742
NIR-PKIVIT-Flank	43	HPKIVITGPS	105.4275278	99.0659337	28	0.808056612	18.72170171	0.152708346
NIR-PKIVIT-Flank	44	HSKIVITGPH	7.531142529	74.077418	40	2.487284975	11.7126682	0.393274286
NIR-PKIVIT-Flank	45	HFKIVITGPH	-65.89180217	83.20936441	22	-2.285961798	17.7402961	-0.487368693
NIR-PKIVIT-Flank	46	HYKIVITGPH	-90.23564067	52.95822533	32	-0.696029923	9.361780062	-0.12304187
NIR-PKIVIT-Flank	47	HIKIVITGPH	-33.93020835	49.07144771	19	-2.149908461	11.25776219	-0.493222827
NIR-PKIVIT-Flank	48	HPKFVITGPH	218.3567206	181.1493301	44	0.753607171	27.30928905	0.113610556
NIR-PVIVIT-Core	1	HFVIVITGPH	110.9560967	176.2775955	16	1.229533246	44.06939889	0.307383311
NIR-PVIVIT-Core	2	HLVIVITGPH	70.30591602	91.52522688	19	1.200043138	20.99732709	0.275308777
NIR-PVIVIT-Core	3	HYVIVITGPH	39.84870177	401.6970726	17	2.585746265	97.42585058	0.627135587
NIR-PVIVIT-Core	4	HSVIVITGPH	17.62824462	109.0502564	24	2.498322754	22.25979037	0.509967997
NIR-PVIVIT-Core	5	HRVIVITGPH	465.1662991	173.8328348	12	0.385032938	50.18121698	0.111149435
NIR-PVIVIT-Core	6	HIVIVITGPH	136.1192971	566.9513935	26	1.865548842	111.1883161	0.365864229
NIR-PVIVIT-Core	7	HPTIVITGPH	-51.49606644	49.18337374	13	-0.807412597	13.64101353	-0.223935963
NIR-PVIVIT-Core	8	HPSIVITGPH	-53.54674549	111.9946987	19	-3.461774664	25.693346	-0.794185575
NIR-PVIVIT-Core	9	HPIIVITGPH	64.24655803	86.76966074	17	1.589272577	21.0447339	0.385455218
NIR-PVIVIT-Core	10	HPNIVITGPH	-79.68671499	44.35704221	31	-0.525658515	7.966759963	-0.094411056
NIR-PVIVIT-Core	11	HPQIVITGPH	-59.60989157	87.52376428	33	-1.691554025	15.23593173	-0.29446176
NIR-PVIVIT-Core	12	HPRIVITGPH	586.4030356	198.0648938	27	0.321010129	38.11760658	0.061778428
NIR-PVIVIT-Core	13	HPYIVITGPH	-38.15971224	91.88077458	20	-2.83762496	20.54516578	-0.634512231
NIR-PVIVIT-Core	14	HPFIVITGPH	-43.65153399	95.38989954	23	-3.475542102	19.89016901	-0.724700625
NIR-PVIVIT-Core	15	HPLIVITGPH	10.46826715	606.9657672	32	4.872445514	107.2974025	0.861334816
NIR-PVIVIT-Core	16	HPAIVITGPH	18.28505241	91.33665224	27	2.606115543	17.57774692	0.50154717
NIR-PVIVIT-Core	17	HPVIVITGPH	21.89402906	78.42170901	15	3.32833593	20.2483982	0.859372642
NIR-PVIVIT-Core	18	HPVFVITGPH	54.22509351	89.40925821	26	1.127946686	17.53459817	0.221208545
NIR-PVIVIT-Core	19	HPVYVITGPH	-96.61293093	56.54448918	16	-0.526689828	14.1361223	-0.131672457
NIR-PVIVIT-Core	20	HPVVVITGPH	6.180043258	44.24431813	13	-3.421681265	12.27116597	-0.949003635
NIR-PVIVIT-Core	21	HPVMVITGPH	-49.95991287	97.42676645	26	-5.562113731	19.1069609	-1.090820248
NIR-PVIVIT-Core	22	SCRAMBLED	-28.9211742	253.112591	22	4.276987738	53.96378571	0.91185685
NIR-PVIVIT-Core	23	HPVIYITGPH	-34.92350796	58.04008478	19	-2.442874388	13.31530864	-0.56043382
NIR-PVIVIT-Core	24	HPVIRITGPH	687.6452104	547.5812247	22	0.701763383	116.7447094	0.149616456
NIR-PVIVIT-Core	25	HPVIKITGPH	243.4507388	262.1111566	20	0.890886608	58.60983638	0.199208302
NIR-PVIVIT-Core	26	HPVIIITGPH	-21.21170021	87.76403831	26	-5.568905746	17.211944	-1.092152272
NIR-PVIVIT-Core	27	HPVIQITGPH	-13.04230413	95.78853058	24	71.81938966	19.55275193	14.66007152
NIR-PVIVIT-Core	28	HPVILITGPH	138.2042237	116.1462727	21	0.714641816	25.34519459	0.155947629
NIR-PVIVIT-Core	29	HPVISITGPH	-36.85320146	93.94352894	31	-6.602772586	16.87275589	-1.185892964
NIR-PVIVIT-Core	30	HPVITITGPH	-40.55957	59.29729303	25	-1.586940136	11.85945861	-0.317388027
NIR-PVIVIT-Core	31	HPVIVDTGPH	-60.14693854	72.50082548	15	-1.275536682	18.71963265	-0.329342155
NIR-PVIVIT-Core	32	HPVIVRTGPH	126.4305062	91.1558995	14	0.759931024	24.36243891	0.203100109
NIR-PVIVIT-Core	33	HPVIVQTGPH	-80.15130386	34.61348067	4	-0.426002216	17.30674033	-0.213001108
NIR-PVIVIT-Core	34	HPVIVETGPH	-68.36779592	54.05723761	24	-0.84946745	11.03438742	-0.173396817
NIR-PVIVIT-Core	35	HPVIVVTGPH	134.6979802	154.3448209	27	0.912972093	29.70367464	0.175701561
NIR-PVIVIT-Core	36	HPVIVLTGPH	191.7059426	112.7156857	20	0.504240623	25.20399353	0.112751631
NIR-PVIVIT-Core	37	HPVIVHTGPH	21.60031091	290.9669949	34	4.392252962	49.90042796	0.753265169
NIR-PVIVIT-Core	38	HPVIVSTGPH	-58.3306861	71.63946853	18	-1.923338397	16.88558467	-0.453335208
NIR-PVIVIT-Core	39	HPVIFITGPH	120.5295649	308.2658473	12	1.206536661	88.98868496	0.348297133
NIR-PVIVIT-Core	40	HPVIVKTGPH	114.9377848	144.349896	21	0.923451952	31.49972976	0.201513737
NIR-PVIVIT-Core	41	HPVIVIEGPH	109.6640701	95.89977933	17	0.706245372	23.25911292	0.171289663
NIR-PVIVIT-Core	42	HPVIVIHGPH	26.00802915	233.6636266	15	2.165139292	60.33168895	0.559036561
NIR-PVIVIT-Core	43	HPVIVIDGPH	-25.0256114	65.92624953	22	-3.732413411	14.05552363	-0.795753213
NIR-PVIVIT-Core	44	HPVIVIQGPH	104.6952633	200.48536	13	1.569843937	55.60463427	0.43539637
NIR-PVIVIT-Core	45	HPVIVISGPH	39.7976483	46.79667296	16	1.226698489	11.69916824	0.306674622
NIR-PVIVIT-Core	46	HPVIVIRGPH	825.5839613	542.7841499	15	1.009198853	140.1462649	0.260574023
NIR-PVIVIT-Core	47	HPVIVIFGPH	96.95537712	660.4633309	13	1.849554566	183.1795696	0.51297414
NIR-PVIVIT-Core	48	HPVIVIKGPH	651.3343633	178.1989122	2	0.273590528	126.0056592	0.193457717
NIR-PVIVIT-Flank	1	HPVIVITGPH	62.42273471	76.21091474	15	0.87606918	19.67757357	0.226200089
NIR-PVIVIT-Flank	2	SCRAMBLED	-59.73683748	46.55350067	29	-0.754631515	8.64476805	-0.140131554
NIR-PVIVIT-Flank	3	FPVIVITGPH	-1.742586102	85.67325925	21	-13.01636171	18.69543788	-2.840402992
NIR-PVIVIT-Flank	4	YPVIVITGPH	-12.84520726	40.10326208	29	-2.421919086	7.446988813	-0.449739084
NIR-PVIVIT-Flank	5	IPVIVITGPH	61.27753925	93.27176298	22	1.506196842	19.88560668	0.321122246
NIR-PVIVIT-Flank	6	VPVIVITGPH	-11.38684822	116.1566214	29	9.551504619	21.56974309	1.77366988
NIR-PVIVIT-Flank	7	TPVIVITGPH	35.24767875	68.64156178	33	2.765054392	11.94896218	0.481334187
NIR-PVIVIT-Flank	8	QPVIVITGPH	-45.66573784	66.10451303	28	-1.844794438	12.49257872	-0.348633379
NIR-PVIVIT-Flank	9	APVIVITGPH	30.10047173	65.71125783	29	2.12040512	12.20227424	0.393749346
NIR-PVIVIT-Flank	10	GPVIVITGPH	39.38721958	66.5792238	34	1.57625525	11.41824268	0.270325545
NIR-PVIVIT-Flank	11	NPVIVITGPH	-14.67987057	260.6304682	18	6.549147032	61.43119048	1.543648759
NIR-PVIVIT-Flank	12	EPVIVITGPH	-64.75900597	56.75159818	36	-1.048763278	9.458599696	-0.17479388
NIR-PVIVIT-Flank	13	RPVIVITGPH	110.5903796	201.2243634	39	1.369480207	32.22168582	0.219292337
NIR-PVIVIT-Flank	14	HPVIVITMPH	-7.347254148	159.2689111	29	5.623937638	29.5754943	1.044339002
NIR-PVIVIT-Flank	15	HPVIVITHPH	64.77773888	525.0049963	31	2.029017833	94.29368092	0.364422361
NIR-PVIVIT-Flank	16	HPVIVITSPH	-38.09269731	69.52165628	24	-3.621565227	14.19104866	-0.739248906
NIR-PVIVIT-Flank	17	HPVIVITTPH	10.73086319	48.342531	25	5.232321696	9.6685062	1.046464339
NIR-PVIVIT-Flank	18	HPVIVITAPH	-28.22522805	71.22943133	37	-12.8409351	11.71004638	-2.111036727
NIR-PVIVIT-Flank	19	HPVIVITDPH	40.35679642	270.4600578	31	2.763615263	48.57606036	0.496359954
NIR-PVIVIT-Flank	20	HPVIVITNPH	41.0199213	204.8772608	28	1.932073461	38.71816295	0.365127564
NIR-PVIVIT-Flank	21	HPVIVITKPH	373.7081758	216.0367401	14	0.627652422	57.73824745	0.167747166
NIR-PVIVIT-Flank	22	SCRAMBLED	-25.4907378	106.9088111	10	-17.21710928	33.80753452	-5.444528004
NIR-PVIVIT-Flank	23	HPVIVITEPH	22.16478701	110.8341851	33	2.452395688	19.29375514	0.426907293
NIR-PVIVIT-Flank	24	HPVIVITGFH	6.562673389	74.27032507	34	6.906353326	12.73725567	1.184429824
NIR-PVIVIT-Flank	25	HPVIVITGDH	-39.53771625	71.54303342	12	-3.489209494	20.6526948	-1.00724802
NIR-PVIVIT-Flank	26	HPVIVITGYH	33.12276206	140.1662458	65	1.914682175	17.3854831	0.237487095
NIR-PVIVIT-Flank	27	HPVIVITGIH	58.98644115	82.43112275	29	1.607965293	15.30707521	0.298591659
NIR-PVIVIT-Flank	28	HPVIVITGVH	73.55526566	89.43597415	27	0.85555359	17.21196125	0.164651365
NIR-PVIVIT-Flank	29	HPVIVITGLH	23.45117818	78.45076757	31	2.256123638	14.0901738	0.405211767
NIR-PVIVIT-Flank	30	HPVIVITGEH	-34.64974835	47.77290155	28	-1.618791462	9.02822978	-0.305922831
NIR-PVIVIT-Flank	31	HPVIVITGSH	-17.75141834	64.9605949	13	12.34069591	18.01682737	3.422693221
NIR-PVIVIT-Flank	32	HPVIVITGTH	-13.31604938	78.97098025	21	-7.778987046	17.2328807	-1.697514141
NIR-PVIVIT-Flank	33	HPVIVITGRH	175.0650124	145.1084363	23	0.749809869	30.25720058	0.156346166
NIR-PVIVIT-Flank	34	HPVIVITGAH	86.44629517	222.4586546	36	1.510376452	37.07644243	0.251729409
NIR-PVIVIT-Flank	35	HPVIVITGPP	71.24970934	97.40244073	33	1.074809087	16.95558857	0.187100247
NIR-PVIVIT-Flank	36	HPVIVITGPT	-71.94436397	60.15737087	23	-0.995796981	12.54367894	-0.207638024
NIR-PVIVIT-Flank	37	HPVIVITGPF	-38.70223956	48.84072838	29	-1.532804493	9.069495573	-0.284634649
NIR-PVIVIT-Flank	38	HPVIVITGPD	24.2910887	182.1180587	19	2.7761727	41.78074808	0.636897697
NIR-PVIVIT-Flank	39	HPVIVITGPA	-39.74298386	123.2693115	37	-3.682419829	20.26534998	-0.605386091
NIR-PVIVIT-Flank	40	HPVIVITGPG	12.34484548	79.01740691	18	13.1659878	18.62458142	3.103253085
NIR-PVIVIT-Flank	41	HPVIVITGPI	45.95797233	119.5596642	17	1.937988211	28.99747788	0.470031182
NIR-PVIVIT-Flank	42	HPVIVITGPQ	148.2781087	132.9717823	23	0.755326185	27.72653328	0.157496397
NIR-PVIVIT-Flank	43	HPVIVITGPS	34.53501758	305.7574649	33	2.51407429	53.22554279	0.437644159
NIR-PVIVIT-Flank	44	HPVIVITGPV	28.55066144	118.0214075	39	1.886389836	18.89855009	0.302064122
NIR-PVIVIT-Flank	45	HPVIVITGPY	-59.46351236	54.84264304	14	-1.267328945	14.65731289	-0.338707908
NIR-PVIVIT-Flank	46	HPVIVITQPH	-11.69421493	61.93065988	24	-2.899066872	12.64154301	-0.591769547
NIR-PVIVIT-Flank	47	HPVIVITGPZ	130.1646296	101.0856476	31	0.853375094	18.15551827	0.153270691
NIR-PVIVIT-Flank	48	HPVIVITGPX	141.4549626	114.7676699	29	0.765214323	21.31182127	0.142096732
aHis-AKAP79-Core	1	PEAIIITDTEIS	-43.28130738	70.60131511	35	-2.377519177	11.93380037	-0.40187409
aHis-AKAP79-Core	2	PFAIIITDTEIS	-84.69888526	33.50815913	29	-0.407166717	6.222308941	-0.075608961
aHis-AKAP79-Core	3	PHAIIITDTEIS	32.04286399	53.43034637	34	1.72375676	9.163228807	0.295621845
aHis-AKAP79-Core	4	PQAIIITDTEIS	37.74843827	37.62517362	44	0.848288774	5.672208344	0.127884344
aHis-AKAP79-Core	5	PYAIIITDTEIS	-64.29044967	47.30760968	53	-0.821677606	6.498199944	-0.112866099
aHis-AKAP79-Core	6	PAAIIITDTEIS	16.18987739	44.63187715	25	2.76162928	8.92637543	0.552325856
aHis-AKAP79-Core	7	PGAIIITDTEIS	11.14067097	48.1781046	60	2.180921651	6.219766558	0.281555774
aHis-AKAP79-Core	8	PRAIIITDTEIS	68.86549195	81.54948134	44	1.044481758	12.29404688	0.15746155
aHis-AKAP79-Core	9	PPAIIITDTEIS	32.16373723	84.29142154	14	2.413820853	22.52783	0.645120759
aHis-AKAP79-Core	10	PPKIIITDTEIS	3104.969735	1155.130908	48	0.406916844	166.7287852	0.058733387
aHis-AKAP79-Core	11	PIFIIITDTEIS	-74.15238165	56.06619211	75	-0.856509171	6.473966221	-0.09890116
aHis-AKAP79-Core	12	PIPIIITDTEIS	-4.012870096	51.80734722	75	-14.86911469	5.982197173	-1.716937474
aHis-AKAP79-Core	13	PIQIIITDTEIS	-44.09109238	66.19731897	27	-1.507882918	12.73967998	-0.290192203
aHis-AKAP79-Core	14	PIYIIITDTEIS	-63.73934149	67.63191504	27	-1.364372643	13.01576812	-0.262573638
aHis-AKAP79-Core	15	PIVIIITDTEIS	-63.52532019	41.26509102	26	-0.716150708	8.092750167	-0.140448709
aHis-AKAP79-Core	16	PIIIIITDTEIS	-26.6549146	75.47535577	35	-4.669643906	12.75766361	-0.789313883
aHis-AKAP79-Core	17	PIKIIITDTEIS	79.07361518	104.1803931	38	1.147938886	16.90029143	0.186220277
aHis-AKAP79-Core	18	PISIIITDTEIS	-45.77388785	65.73842527	31	-2.346243297	11.80696973	-0.421397736
aHis-AKAP79-Core	19	PIGIIITDTEIS	-37.32872208	39.54403581	22	-1.032714846	8.430816762	-0.220175545
aHis-AKAP79-Core	20	PIAFIITDTEIS	-47.66390294	47.22805064	33	-1.210418773	8.221348351	-0.210706863
aHis-AKAP79-Core	21	PIAYIITDTEIS	-72.42367289	53.61074578	45	-0.828415203	7.991818126	-0.123492847
aHis-AKAP79-Core	22	PIALIITDTEIS	-53.2365905	50.92194235	27	-1.208295544	9.799932375	-0.232536586
aHis-AKAP79-Core	23	PIAAIITDTEIS	153.4120141	100.9998185	68	0.63728648	12.24802706	0.077282337
aHis-AKAP79-Core	24	PIAVIITDTEIS	160.3643865	112.5092476	13	0.660310814	31.20445085	0.183137269
aHis-AKAP79-Core	25	PIAGIITDTEIS	52.80740957	67.00791098	26	0.957725903	13.14133253	0.187825503
aHis-AKAP79-Core	26	PIAIHITDTEIS	59.17863843	72.99931751	36	1.226898176	12.16655292	0.204483029
aHis-AKAP79-Core	27	PIAIYITDTEIS	-53.16106096	213.2377963	63	-9.958400257	26.8654371	-1.254640502
aHis-AKAP79-Core	28	PIAIFITDTEIS	-51.9356286	35.65839042	27	-0.683988226	6.862460437	-0.131633595
aHis-AKAP79-Core	29	PIAIQITDTEIS	25.22184113	68.27455008	37	1.728631451	11.22426689	0.28418526
aHis-AKAP79-Core	30	PIAIEITDTEIS	-8.623411349	38.54581543	28	-8.330670533	7.284474407	-1.574348749
aHis-AKAP79-Core	31	PIAILITDTEIS	-75.77818949	27.66394595	28	-0.366354852	5.227994377	-0.069234559
aHis-AKAP79-Core	32	PIAIIITDTEIS	-55.23926737	48.95086709	36	-1.181272975	8.158477848	-0.196878829
aHis-AKAP79-Core	33	SCRAMBLED	-101.1549373	42.37520433	51	-0.458695865	5.933715468	-0.064230268
aHis-AKAP79-Core	34	PIAIAITDTEIS	22.47740651	55.87533125	26	2.193885591	10.95805401	0.430256363
aHis-AKAP79-Core	35	PIAIIDTDTEIS	-13.24201004	56.28792675	14	19.0936442	15.04358121	5.102991062
aHis-AKAP79-Core	36	PIAIIFTDTEIS	-48.90590588	45.79622442	32	-1.088724756	8.09570521	-0.192461164
aHis-AKAP79-Core	37	PIAIIHTDTEIS	2.432553723	24.01181604	36	7.340143249	4.00196934	1.223357208
aHis-AKAP79-Core	38	PIAIILTDTEIS	-24.77157118	388.0172392	90	5.302746284	40.90060824	0.558958537
aHis-AKAP79-Core	39	PIAIIRTDTEIS	242.2820077	159.6932424	77	0.639256557	18.19873396	0.072850046
aHis-AKAP79-Core	40	PIAIISTDTEIS	2.209588334	42.12742643	8	3.369864872	14.89429445	1.191427151
aHis-AKAP79-Core	41	PIAIIQTDTEIS	21.31108858	46.18641102	34	1.837146254	7.920904144	0.315067983
aHis-AKAP79-Core	42	PIAIIATDTEIS	28.41553249	36.90656732	21	1.227456206	8.053673256	0.267852904
aHis-AKAP79-Core	43	PIAIIGTDTEIS	65.7389471	65.53777422	24	0.843225964	13.37784214	0.172122779
aHis-AKAP79-Core	44	PIAIIYTDTEIS	-66.30958983	37.30233607	26	-0.543426756	7.315589982	-0.106574755
aHis-AKAP79-Core	45	PIAIIIEDTEIS	-62.56433211	52.67553503	22	-1.032137916	11.2304618	-0.220052543
aHis-AKAP79-Core	46	PIAIIIQDTEIS	-44.89255273	42.84598562	19	-1.102569635	9.829543235	-0.252946822
aHis-AKAP79-Core	47	PIAIIIRDTEIS	126.0685269	107.063773	23	0.741295003	22.32433989	0.154570693
aHis-AKAP79-Core	48	PIAIIIIDTEIS	-54.52022609	44.4383152	20	-0.79497571	9.93670936	-0.177761973
aHis-AKAP79-Flank	1	PIAIIITDTEIS	-78.83615735	39.76984576	53	-0.510110415	5.462808441	-0.070069054
aHis-AKAP79-Flank	2	SCRAMBLED	-127.5676089	48.5557833	68	-0.403320122	5.888253626	-0.048909749
aHis-AKAP79-Flank	3	HIAIIITDTEIS	-106.8895689	47.08627176	102	-0.474515588	4.662235629	-0.046984044
aHis-AKAP79-Flank	4	LIAIIITDTEIS	-42.08602907	47.8013494	79	-0.982522131	5.378071986	-0.110542376
aHis-AKAP79-Flank	5	RIAIIITDTEIS	-41.30900317	45.26216882	59	-1.315710945	5.892632467	-0.171290975
aHis-AKAP79-Flank	6	YIAIIITDTEIS	-83.06085579	55.73319241	77	-0.696111611	6.351386735	-0.07932928
aHis-AKAP79-Flank	7	AIAIIITDTEIS	-99.36271803	37.64265051	71	-0.379930947	4.467360719	-0.045089508
aHis-AKAP79-Flank	8	NIAIIITDTEIS	-121.2990037	43.11970755	82	-0.36576414	4.761775109	-0.040391892
aHis-AKAP79-Flank	9	TIAIIITDTEIS	-91.32586349	47.47045778	6	-0.612216658	19.37973324	-0.249936404
aHis-AKAP79-Flank	10	PIAIIITQTEIS	226.9586066	186.9640527	59	0.934355548	24.34064642	0.121642731
aHis-AKAP79-Flank	11	PIAIIITETEIS	-45.84889287	57.84756362	73	-1.348104529	6.770545209	-0.157783701
aHis-AKAP79-Flank	12	PIAIIITFTEIS	45.91729718	83.72081603	66	1.392769606	10.30532007	0.171438087
aHis-AKAP79-Flank	13	PIAIIITYTEIS	66.04092957	96.64577574	92	1.226758808	10.07601865	0.127898447
aHis-AKAP79-Flank	14	PIAIIITRTEIS	2094.382146	1430.835644	103	0.640428471	140.9844253	0.063103292
aHis-AKAP79-Flank	15	PIAIIITLTEIS	37.71305491	80.95064883	94	1.763938159	8.34942191	0.181936329
aHis-AKAP79-Flank	16	PIAIIITHTEIS	375.6809262	194.1552851	110	0.491033067	18.51198008	0.046818166
aHis-AKAP79-Flank	17	PIAIIITATEIS	-64.0851642	163.7467101	94	-3.850163988	16.88918358	-0.397114094
aHis-AKAP79-Flank	18	PIAIIITGTEIS	-72.16692876	62.40427859	29	-0.987835377	11.58818362	-0.183436424
aHis-AKAP79-Flank	19	PIAIIITKTEIS	1502.350524	1188.068524	75	0.711657095	137.1863364	0.082175083
aHis-AKAP79-Flank	20	PIAIIITDDEIS	-82.89242193	41.4156522	82	-0.480010282	4.573593675	-0.053008268
aHis-AKAP79-Flank	21	PIAIIITDEEIS	-95.65052258	37.53874839	52	-0.384244273	5.205687774	-0.053285093
aHis-AKAP79-Flank	22	PIAIIITDHEIS	-85.46844351	33.72147458	53	-0.379028947	4.632000765	-0.05206363
aHis-AKAP79-Flank	23	PIAIIITDYEIS	-100.02119	40.83354088	75	-0.413957207	4.715051163	-0.047799661
aHis-AKAP79-Flank	24	PIAIIITDREIS	6.674537642	128.4341191	70	8.64109075	15.35081335	1.032807888
aHis-AKAP79-Flank	25	PIAIIITDVEIS	-96.50999956	44.8537477	77	-0.461521793	5.111558944	-0.05259529
aHis-AKAP79-Flank	26	PIAIIITDAEIS	-86.8991542	46.15858286	76	-0.543503856	5.29475258	-0.062344168
aHis-AKAP79-Flank	27	PIAIIITDGEIS	-112.2111502	36.98206577	41	-0.332783003	5.775628334	-0.051971974
aHis-AKAP79-Flank	28	PIAIIITDPEIS	-98.12230988	42.37163561	55	-0.437241001	5.71339018	-0.058957565
aHis-AKAP79-Flank	29	PIAIIITDFEIS	-114.5928992	41.21139264	81	-0.363532645	4.579043627	-0.040392516
aHis-AKAP79-Flank	30	PIAIIITDQEIS	-112.7731329	88.58146305	72	-0.934701919	10.43942554	-0.110155678
aHis-AKAP79-Flank	31	PIAIIITDTHIS	0.328019623	45.95572294	71	-31.27629405	5.453940907	-3.711813211
aHis-AKAP79-Flank	32	PIAIIITDTLIS	34.80884661	67.15701375	48	2.027641592	9.693279992	0.292664855
aHis-AKAP79-Flank	33	PIAIIITDTFIS	65.31655393	74.73517113	51	0.840624101	10.46501717	0.117710919
aHis-AKAP79-Flank	34	PIAIIITDTSIS	30.1123899	98.81304265	67	2.223508236	12.07193452	0.271644766
aHis-AKAP79-Flank	35	PIAIIITDTYIS	239.5850255	185.6611792	65	0.841538942	23.02843509	0.104380059
aHis-AKAP79-Flank	36	PIAIIITDTPIS	-39.29060029	79.19506569	59	-2.752899429	10.31031936	-0.358396979
aHis-AKAP79-Flank	37	PIAIIITDTAIS	73.48243945	114.3436152	65	1.160787835	14.18257996	0.143978011
aHis-AKAP79-Flank	38	PIAIIITDTGIS	4.657931618	73.87344535	66	3.931439246	9.093192532	0.483926719
aHis-AKAP79-Flank	39	PIAIIITDTQIS	77.01380823	93.86159298	60	1.154916324	12.11747955	0.149099056
aHis-AKAP79-Flank	40	PIAIIITDTDIS	-86.87227322	31.17829198	46	-0.375607677	4.596988358	-0.055380331
aHis-AKAP79-Flank	41	PIAIIITDTTIS	103.4994496	130.7702822	91	1.037615962	13.70845039	0.108771708
aHis-AKAP79-Flank	42	PIAIIITDTSIS	52.14539591	132.3314739	66	2.018205071	16.28887842	0.248423871
aHis-AKAP79-Flank	43	PIAIIITDTZ	-95.66730279	32.63277236	59	-0.324392546	4.248425096	-0.042232312
aHis-AKAP79-Flank	44	PIAIIITDTX	-90.58381259	66.98659659	73	-0.795542776	7.840188112	-0.093111239
aHis-AKAP79-Flank	45	PIAIIIFDTEIS	-54.08115061	91.2551824	56	-2.453213469	12.19448669	-0.327824439
aHis-AKAP79-Flank	46	PIAIIISDTEIS	-97.71365695	69.52598267	65	-0.7896841	8.623636807	-0.097948258
aHis-AKAP79-Flank	47	PIAIIIADTEIS	-86.80115617	476.8223659	65	-230.2042015	59.1425356	-28.55331703
aHis-AKAP79-Flank	48	PIAIIIHDTEIS	-67.38201332	45.24666235	59	-0.645544397	5.890613696	-0.084042722
aHis-NFATc2-Core	1	SFRIEITPSHEL	-6.272303482	9.588208738	71	-1.680770619	1.137911027	-0.199470774
aHis-NFATc2-Core	2	SHRIEITPSHEL	4.488483225	11.30960822	54	2.37304323	1.539042741	0.322930281
aHis-NFATc2-Core	3	SLRIEITPSHEL	-7.357027602	56.19384492	63	-1500.831149	7.079758994	-189.0869514
aHis-NFATc2-Core	4	SYRIEITPSHEL	-6.744331585	4.636260012	36	-0.760973079	0.772710002	-0.126828846
aHis-NFATc2-Core	5	SKRIEITPSHEL	132.7051715	74.47887504	91	0.587195838	7.807507537	0.061554849
aHis-NFATc2-Core	6	SARIEITPSHEL	-7.533460251	30.7382235	96	-9.116119413	3.137206799	-0.930410041
aHis-NFATc2-Core	7	SPEIEITPSHEL	-13.4879939	32.78967737	101	-3.218128943	3.262694844	-0.320215798
aHis-NFATc2-Core	8	SPGIEITPSHEL	-10.92461322	8.249471512	57	-0.771746633	1.092669195	-0.102220339
aHis-NFATc2-Core	9	SPLIEITPSHEL	-2.760860677	17.0096633	55	19.34237733	2.293582532	2.608125627
aHis-NFATc2-Core	10	SPVIEITPSHEL	-1.575117029	34.83077559	76	4.870182285	3.995363972	0.558648222
aHis-NFATc2-Core	11	SPYIEITPSHEL	5.114030509	35.04786144	90	2.318625724	3.694368976	0.244404611
aHis-NFATc2-Core	12	SPKIEITPSHEL	-7.427908353	9.864634565	95	-1.494032144	1.012090151	-0.153284464
aHis-NFATc2-Core	13	SPSIEITPSHEL	-9.699551821	10.28186664	111	-1.126212263	0.975911594	-0.106895337
aHis-NFATc2-Core	14	SPAIEITPSHEL	-11.48804385	12.17196274	81	-1.042472877	1.352440304	-0.11583032
aHis-NFATc2-Core	15	SPRFEITPSHEL	-2.890779893	15.64984499	64	24.37377702	1.956230623	3.046722128
aHis-NFATc2-Core	16	SPRHEITPSHEL	3.668778863	32.33731202	71	4.053506992	3.837732878	0.481062775
aHis-NFATc2-Core	17	SPRLEITPSHEL	-4.411242361	16.07681291	92	-4.243466117	1.676123611	-0.442411925
aHis-NFATc2-Core	18	SPRYEITPSHEL	-0.092476795	26.66938063	81	12.36979701	2.963264515	1.37442189
aHis-NFATc2-Core	19	SPRAEITPSHEL	-4.809898335	16.26692621	93	-3.85543372	1.68680167	-0.399789853
aHis-NFATc2-Core	20	SPRKEITPSHEL	5.747469588	14.11098222	73	1.877317614	1.651565547	0.219723407
aHis-NFATc2-Core	21	SPRIDITPSHEL	-4.414156842	1391.734077	89	9.625611085	147.5235171	1.020312734
aHis-NFATc2-Core	23	SPRIHITPSHEL	553.2154415	340.2804296	71	0.57549258	40.38385724	0.068298404
aHis-NFATc2-Core	24	SPRINITPSHEL	54.34361558	64.77392216	64	1.043009022	8.096740271	0.130376128
aHis-NFATc2-Core	25	SPRIFITPSHEL	213.9994327	137.5379357	69	0.582181585	16.55762172	0.070086427
aHis-NFATc2-Core	26	SPRIVITPSHEL	152.7387183	74.59661317	87	0.497990651	7.997596404	0.053390202
aHis-NFATc2-Core	27	SPRILITPSHEL	243.6229492	136.7109143	65	0.540424272	16.95690197	0.067031381
aHis-NFATc2-Core	28	SPRIAITPSHEL	41.03721717	28.65152875	63	0.615283666	3.609753322	0.077518456
aHis-NFATc2-Core	29	SPRIGITPSHEL	22.0379345	19.28762258	77	0.796656625	2.198028588	0.090787448
aHis-NFATc2-Core	30	SPRIEETPSHEL	-7.320768266	9.7458497	90	-1.333819036	1.02730276	-0.140596871
aHis-NFATc2-Core	31	SPRIEFTPSHEL	0.299531282	10.18493281	66	7.772933278	1.253678565	0.956781947
aHis-NFATc2-Core	32	SPRIEHTPSHEL	-4.017740004	7.480716332	74	-2.265303655	0.86961561	-0.263336201
aHis-NFATc2-Core	33	SPRIEQTPSHEL	-6.330906009	10.07693457	76	-1.785157709	1.15590367	-0.204771633
aHis-NFATc2-Core	34	SPRIERTPSHEL	47.20330557	32.6208635	70	0.625575322	3.898938932	0.074770552
aHis-NFATc2-Core	35	SPRIEYTPSHEL	-0.894175437	14.86498947	88	8.937736688	1.584613202	0.952765932
aHis-NFATc2-Core	36	SPRIEATPSHEL	-5.458884926	28.01370954	71	-25.53924989	3.324615666	-3.030951333
aHis-NFATc2-Core	37	SPRIEITPSHEL	-2.544000017	15.67935141	66	-23.06549228	1.929994742	-2.839165834
aHis-NFATc2-Core	38	SPRIEISPSHEL	-1.57910903	12.89809828	67	-71.37687353	1.575753501	-8.72007298
aHis-NFATc2-Core	39	SPRIEIEPSHEL	-8.049159152	14.09385348	71	-1.672159669	1.67263268	-0.198448842
aHis-NFATc2-Core	40	SPRIEIFPSHEL	1.688696845	9.717063667	53	17.97221788	1.334741345	2.468673983
aHis-NFATc2-Core	41	SPRIEIHPSHEL	-1.66044685	13.67306538	39	-27.63318976	2.189442717	-4.42485166
aHis-NFATc2-Core	42	SPRIEIKPSHEL	5.342167165	10.86759633	71	1.612466595	1.289746399	0.191364578
aHis-NFATc2-Core	43	SPRIEILPSHEL	-1.336280982	44.01635599	47	5.822414254	6.420445393	0.849286406
aHis-NFATc2-Core	44	SPRIEIYPSHEL	-4.97239969	8.627493309	51	-2.959137729	1.208090706	-0.414362163
aHis-NFATc2-Core	45	SPRIEINPSHEL	-5.995506684	11.76532484	54	-2.476215483	1.601057918	-0.336970246
aHis-NFATc2-Core	46	SPRIEIAPSHEL	-8.465590119	7.618993925	69	-0.950057582	0.917219083	-0.114373492
aHis-NFATc2-Core	47	Scrambled	-7.43214517	12.13444307	73	-2.450944696	1.420229138	-0.286861379
aHis-NFATc2-Core	48	SPRIEIPPSHEL	-7.368004951	7.967814698	60	-1.291978639	1.028640454	-0.166793725
aHis-NFATc2-Flank	1	SPRIEITPSHEL	-1.848429207	19.25019968	90	-18.27872159	2.029149214	-1.926746431
aHis-NFATc2-Flank	2	Scrambled	-37.80204927	23.04907392	116	-0.651360636	2.140052788	-0.060477317
aHis-NFATc2-Flank	3	FPRIEITPSHEL	-0.344959822	36.99437246	95	3.716320312	3.79554253	0.381286419
aHis-NFATc2-Flank	4	HPRIEITPSHEL	49.57235013	32.11404145	45	0.594612371	4.787278647	0.088639579
aHis-NFATc2-Flank	5	LPRIEITPSHEL	-9.535658777	19.19076294	85	-1.823296525	2.081530495	-0.197764275
aHis-NFATc2-Flank	6	YPRIEITPSHEL	-30.69536836	14.43245199	77	-0.508361029	1.644730548	-0.057933116
aHis-NFATc2-Flank	7	APRIEITPSHEL	-10.23467704	18.27562225	103	-2.261534505	1.800750568	-0.222835616
aHis-NFATc2-Flank	8	QPRIEITPSHEL	2.043095556	23.29191039	105	8.165307369	2.273057705	0.796852406
aHis-NFATc2-Flank	9	KPRIEITPSHEL	246.3477664	130.1496699	90	0.509654862	13.71897979	0.05372234
aHis-NFATc2-Flank	10	DPRIEITPSHEL	-32.47973776	53.4516687	131	-2.341253687	4.670093978	-0.204556284
aHis-NFATc2-Flank	11	GPRIEITPSHEL	-4.884011412	19.44248303	87	-5.681278189	2.084452977	-0.609096956
aHis-NFATc2-Flank	12	SPRIEITGSHEL	-28.94670957	18.98602153	123	-0.706198008	1.71191191	-0.06367573
aHis-NFATc2-Flank	13	SPRIEITFSHEL	-20.02997942	48.87290785	102	-3.719604842	4.839138963	-0.368295759
aHis-NFATc2-Flank	14	SPRIEITHSHEL	-1.881318001	22.10191324	95	24.49157628	2.267608452	2.512782707
aHis-NFATc2-Flank	15	SPRIEITKSHEL	30.91412033	18.1651826	76	0.572868705	2.083689348	0.065712547
aHis-NFATc2-Flank	16	SPRIEITQSHEL	-3.237244617	24.40927306	150	14.17881001	1.9930088	1.15769499
aHis-NFATc2-Flank	17	SPRIEITYSHEL	-29.36191725	39.07678587	125	-1.513868805	3.495133982	-0.135404542
aHis-NFATc2-Flank	18	SPRIEITNSHEL	-3.813652245	19.78202307	53	62.14315701	2.717269845	8.536019092
aHis-NFATc2-Flank	19	SPRIEITASHEL	-22.07412806	16.69968039	117	-0.82385614	1.543885998	-0.076165527
aHis-NFATc2-Flank	20	SPRIEITGSHEL	-29.80952706	19.29072147	105	-0.695931086	1.882581649	-0.06791592
aHis-NFATc2-Flank	21	SPRIEITPEHEL	-33.19918037	41.25121723	113	-1.781266639	3.88058809	-0.16756747
aHis-NFATc2-Flank	22	SPRIEITPFHEL	-9.126591785	11.23702602	62	-1.112724472	1.427103731	-0.141316149
aHis-NFATc2-Flank	23	SPRIEITPHHEL	14.40918663	28.67561555	16	1.414006359	7.168903888	0.35350159
aHis-NFATc2-Flank	24	SPRIEITPLHEL	-15.52984107	18.56298524	87	-1.320108205	1.990160916	-0.141530455
aHis-NFATc2-Flank	25	SPRIEITPQHEL	1.044064736	28.12589206	119	6.553329708	2.578296298	0.600742749
aHis-NFATc2-Flank	26	SPRIEITPKHEL	35.06785306	20.74893539	104	0.587136832	2.034600509	0.057573503
aHis-NFATc2-Flank	27	SPRIEITPRHEL	151.1794287	74.58621352	101	0.480081903	7.421605633	0.047769935
aHis-NFATc2-Flank	28	SPRIEITPPHEL	-14.04757683	21.01094909	101	-1.524655896	2.090667574	-0.151708932
aHis-NFATc2-Flank	29	SPRIEITPVHEL	-18.58469984	31.73180305	36	-3.239490237	5.288633841	-0.53991504
aHis-NFATc2-Flank	30	SPRIEITPAHEL	-45.27330735	22.18275306	61	-0.539421563	2.840210491	-0.069065854
aHis-NFATc2-Flank	31	SPRIEITPGHEL	-13.22914941	25.90661692	96	-2.280946983	2.644083017	-0.232798177
aHis-NFATc2-Flank	32	SPRIEITPTHEL	-19.92228822	31.56546532	108	-2.132448399	3.037388317	-0.205194943
aHis-NFATc2-Flank	33	SPRIEITPDHEL	-20.92249543	20.43932655	112	-1.140036739	1.931334822	-0.107723346
aHis-NFATc2-Flank	34	SPRIEITPSDEL	-34.53100162	18.65966473	119	-0.577873416	1.710528662	-0.052973569
aHis-NFATc2-Flank	35	SPRIEITPSEEL	-44.43430475	22.59691222	111	-0.541547548	2.144803991	-0.051401419
aHis-NFATc2-Flank	36	SPRIEITPSFEL	-29.65384623	17.19244163	109	-0.641370325	1.64673725	-0.061432136
aHis-NFATc2-Flank	37	SPRIEITPSYEL	-12.86453264	112.2187206	112	11.29304675	10.6036724	1.067092616
aHis-NFATc2-Flank	38	SPRIEITPSVEL	-25.21602885	18.20461117	92	-0.779322757	1.897961915	-0.081250014
aHis-NFATc2-Flank	39	SPRIEITPSQEL	-23.75178822	17.85094844	75	-0.813581009	2.061249978	-0.093944243
aHis-NFATc2-Flank	40	SPRIEITPSPEL	-26.54821999	16.01745814	87	-0.599917716	1.717251765	-0.06431793
aHis-NFATc2-Flank	41	SPRIEITPSAEL	-31.4833425	22.79523417	74	-0.69887483	2.649892147	-0.081242549
aHis-NFATc2-Flank	42	SPRIEITPSGEL	-34.26422237	13.84341946	84	-0.411507223	1.510440894	-0.044899119
aHis-NFATc2-Flank	43	SPRIEITPSTEL	-31.10548896	22.54870744	114	-0.772875057	2.111879946	-0.072386381
aHis-NFATc2-Flank	44	SPRIEITPSSEL	-22.26105018	68.01141466	84	-4.59607282	7.42065371	-0.501472657
aHis-NFATc2-Flank	45	SPRIEITPSZEL	-25.62019735	26.77042704	76	-1.261578943	3.070778583	-0.14471303
aHis-NFATc2-Flank	46	SPRIEITPSXEL	-44.94206291	19.93325981	120	-0.455149251	1.81964934	-0.041549252
aHis-NFATc2-Flank	47	SPRIEIGPSHEL	-30.1636847	13.6660575	65	-0.46650236	1.695065815	-0.057862496
aHis-NFATc2-Flank	48	SPRIEGTPSHEL	-39.03537619	14.99256071	78	-0.385534862	1.697573218	-0.043653227
aHis-PKIVIT-Core	2	HPKVVITGPH	208.1028389	705.6295676	59	2.280338809	91.86514496	0.296874826
aHis-PKIVIT-Core	3	HPKTVITGPH	159.3382106	180.0045136	60	0.959421659	23.23848277	0.123860804
aHis-PKIVIT-Core	4	HPKMVITGPH	361.0526373	128.3998088	66	0.347872578	15.8049239	0.042820154
aHis-PKIVIT-Core	5	HPKIVITGPH	605.7001048	268.2962951	90	0.405002988	28.28091268	0.042691063
aHis-PKIVIT-Core	6	Scrambled	-61.28320456	67.1052086	105	-1.175103189	6.548797797	-0.114678329
aHis-PKIVIT-Core	7	HPKIFITGPH	1481.630778	902.3262422	99	0.523398565	90.68719951	0.052603535
aHis-PKIVIT-Core	8	HPKIYITGPH	480.0603932	262.8837071	82	0.503565624	29.03064895	0.05560952
aHis-PKIVIT-Core	9	HPKIRITGPH	27173.06102	8530.378074	76	0.30741587	978.5014731	0.035263019
aHis-PKIVIT-Core	10	HPKIMITGPH	433.4720043	201.6392348	83	0.427939074	22.13278139	0.046972416
aHis-PKIVIT-Core	11	HPKIGITGPH	259.3261875	255.8803886	95	0.820766857	26.25277394	0.084208903
aHis-PKIVIT-Core	12	HPKIIITGPH	991.6383006	826.2338865	81	0.73835919	91.80376517	0.08203991
aHis-PKIVIT-Core	13	HPKIQITGPH	110.5566686	91.90015065	99	0.69895578	9.236312663	0.070247699
aHis-PKIVIT-Core	14	HPKILITGPH	698.2320476	311.366276	62	0.402662983	39.5435566	0.05113825
aHis-PKIVIT-Core	15	HPKIEITGPH	-12.50865738	1413.016712	67	-7.594315942	172.6274665	-0.927793359
aHis-PKIVIT-Core	16	HPKISITGPH	254.6046348	163.6463468	57	0.57904141	21.67548815	0.076695908
aHis-PKIVIT-Core	17	HPKIKITGPH	8117.05049	2754.976825	68	0.325612376	334.0900132	0.039486301
aHis-PKIVIT-Core	18	HPKIAITGPH	234.7079626	119.1874017	69	0.500785315	14.34847703	0.060287467
aHis-PKIVIT-Core	19	HPKIHITGPH	636.1459615	342.2460992	68	0.506603454	41.50343579	0.061434693
aHis-PKIVIT-Core	20	HPKIVDTGPH	28.5502665	451.75093	68	2.944265419	54.78284709	0.357044627
aHis-PKIVIT-Core	21	HPKIVRTGPH	11019.07239	4647.683445	63	0.378206576	585.5530747	0.04764955
aHis-PKIVIT-Core	22	HPKIVQTGPH	144.5385617	101.6721036	72	0.654542373	11.98217232	0.077138558
aHis-PKIVIT-Core	23	HPKIVETGPH	-0.901692487	92.88481692	92	5.546766288	9.683911588	0.578290361
aHis-PKIVIT-Core	24	HPKIVVTGPH	292.350433	180.3401649	55	0.555819667	24.31706288	0.074946709
aHis-PKIVIT-Core	25	HPKIVLTGPH	328.5065459	243.7567708	91	0.61859787	25.55265266	0.064846677
aHis-PKIVIT-Core	26	HPKIVHTGPH	466.3640347	250.5918441	70	0.467695788	29.95145413	0.055900339
aHis-PKIVIT-Core	27	HPKIVATGPH	79.05506703	93.44233026	47	0.840324584	13.62996471	0.122573938
aHis-PKIVIT-Core	28	HPKIVGTGPH	87.59531481	93.29822764	62	0.853577728	11.84888676	0.10840448
aHis-PKIVIT-Core	29	HPKIVYTGPH	1316.785174	595.7227348	28	0.432533972	112.5810148	0.081741237
aHis-PKIVIT-Core	30	HPKIVSTGPH	162.227009	121.4446234	50	0.667758663	17.17486335	0.094435336
aHis-PKIVIT-Core	31	HPKIVKTGPH	4305.182683	1924.185564	70	0.411581677	229.9841636	0.04919342
aHis-PKIVIT-Core	32	HPKIVIEGPH	-23.8425809	120.1226583	74	-12.98608752	13.96397538	-1.509602011
aHis-PKIVIT-Core	33	HPKIVIHGPH	2017.98376	1200.416818	54	0.503981581	163.3560379	0.068583206
aHis-PKIVIT-Core	34	HPKIVIDGPH	-35.16562211	48.59882756	77	-1.835686798	5.538350404	-0.209195926
aHis-PKIVIT-Core	35	HPKIVIQGPH	396.1788681	192.0279223	63	0.442149464	24.19324415	0.055705596
aHis-PKIVIT-Core	36	HPKIVISGPH	522.3217154	503.484817	53	0.796315676	69.1589584	0.10938237
aHis-PKIVIT-Core	37	HPKIVIRGPH	13124.63525	6722.330804	70	0.457024609	803.4722099	0.054624889
aHis-PKIVIT-Core	38	HPKIVIVGPH	513.549752	247.4920586	73	0.435319311	28.96675446	0.050950272
aHis-PKIVIT-Core	39	HPKIVIFGPH	347.8480701	209.4811302	52	0.59133759	29.049806	0.082003769
aHis-PKIVIT-Core	41	HPKIVIAGPH	604.8642185	251.5484187	57	0.375874	33.31840199	0.049785727
aHis-PKIVIT-Core	42	HPKIVIGGPH	277.77589	175.5073358	61	0.583069208	22.47141168	0.074654362
aHis-PKIVIT-Core	43	HPKIVIIGPH	339.5026452	447.779213	73	1.019331	52.40859279	0.11930367
aHis-PKIVIT-Core	44	HPKIVIKGPH	5330.889309	1814.346074	52	0.330423261	251.6045308	0.045821462
aHis-PKIVIT-Core	45	HPKIVILGPH	799.3902807	387.4562784	51	0.433459651	54.254731	0.060696492
aHis-PKIVIT-Core	46	HPKIVIMGPH	899.9923742	239.1461908	36	0.251021403	39.85769847	0.041836901
aHis-PKIVIT-Core	47	HPKIVINGPH	595.3099654	265.5920353	54	0.441320588	36.14249812	0.060056125
aHis-PKIVIT-Flank	1	HPKIVITGPH	972.4002761	432.8176673	18	0.414077513	102.0161025	0.097599006
aHis-PKIVIT-Flank	2	Scrambled	12.65347202	67.69050808	54	2.405644281	9.211511401	0.327366722
aHis-PKIVIT-Flank	3	FPKIVITGPH	76.58633514	241.6391249	47	1.755941376	35.2466889	0.256130374
aHis-PKIVIT-Flank	4	YPKIVITGPH	174.1007505	105.4317669	50	0.596335286	14.91030346	0.084334545
aHis-PKIVIT-Flank	5	IPKIVITGPH	101.1050625	129.5201217	38	1.01521295	21.0109382	0.164689287
aHis-PKIVIT-Flank	6	VPKIVITGPH	141.8429099	379.204405	48	2.018624239	54.73344133	0.291363312
aHis-PKIVIT-Flank	7	TPKIVITGPH	326.9714968	149.3283963	60	0.459319487	19.27821306	0.059297891
aHis-PKIVIT-Flank	8	QPKIVITGPH	369.1336173	212.9396211	26	0.503206428	41.76089551	0.0986869
aHis-PKIVIT-Flank	9	APKIVITGPH	31.37241176	361.8866122	49	4.69590869	51.69808745	0.670844099
aHis-PKIVIT-Flank	10	GPKIVITGPH	93.9394805	124.5147448	42	1.159013902	19.21304224	0.178839728
aHis-PKIVIT-Flank	11	NPKIVITGPH	123.4893811	368.7234893	44	1.558781842	55.58715752	0.234995205
aHis-PKIVIT-Flank	12	EPKIVITGPH	7.708617749	216.878719	33	4.032190442	37.75373903	0.701914261
aHis-PKIVIT-Flank	13	RPKIVITGPH	11736.01604	4136.486629	52	0.3437146	573.6274862	0.047664639
aHis-PKIVIT-Flank	14	HPKIVITHPH	1712.121676	462.3770617	35	0.267823286	78.1559882	0.045270398
aHis-PKIVIT-Flank	15	HPKIVITSPH	507.8075149	188.5298236	26	0.38670133	36.97374036	0.07583837
aHis-PKIVIT-Flank	16	HPKIVITTPH	216.0677031	141.9210855	43	0.624936947	21.64276265	0.095301991
aHis-PKIVIT-Flank	17	HPKIVITAPH	498.1763834	157.8132805	34	0.313032279	27.06475432	0.053684593
aHis-PKIVIT-Flank	18	HPKIVITDPH	40.0417124	63.24846831	48	1.271079617	9.129130052	0.18346454
aHis-PKIVIT-Flank	19	HPKIVITNPH	791.390082	340.1374766	41	0.441773336	53.12054928	0.068993404
aHis-PKIVIT-Flank	20	HPKIVITKPH	8289.735327	2652.993382	53	0.30342116	364.416667	0.041678102
aHis-PKIVIT-Flank	22	HPKIVITEPH	38.00872677	340.2242879	59	2.603375455	44.29342953	0.338930615
aHis-PKIVIT-Flank	23	HPKIVITGFH	113.6792412	152.1751462	39	0.93198416	24.36752522	0.149236903
aHis-PKIVIT-Flank	24	HPKIVITGDH	6.60997387	59.34005975	48	8.643335109	8.564999867	1.247557963
aHis-PKIVIT-Flank	25	HPKIVITGYH	128.0297228	80.29964201	27	0.524285	15.45367331	0.100898695
aHis-PKIVIT-Flank	26	HPKIVITGIH	186.2307772	134.6813543	25	0.693518326	26.93627086	0.138703665
aHis-PKIVIT-Flank	27	HPKIVITGVH	216.0173627	106.0835619	35	0.468771559	17.93139473	0.079236855
aHis-PKIVIT-Flank	28	HPKIVITGLH	229.2074455	139.4443018	35	0.558888848	23.570389	0.094469458
aHis-PKIVIT-Flank	29	HPKIVITGEH	1.449099576	54.14227092	22	3.513393409	11.54317095	0.749057992
aHis-PKIVIT-Flank	30	HPKIVITGSH	72.83984196	60.23398623	30	0.739338984	10.99717099	0.134984213
aHis-PKIVIT-Flank	31	HPKIVITGTH	207.5759007	162.1253415	35	0.662235535	27.40418444	0.111938236
aHis-PKIVIT-Flank	32	HPKIVITGRH	12559.74873	4017.014492	47	0.338344501	585.9417848	0.049352618
aHis-PKIVIT-Flank	33	HPKIVITGAH	439.9682776	295.7350822	32	0.702809023	52.27907052	0.124240256
aHis-PKIVIT-Flank	34	HPKIVITGPT	55.93849329	96.45363816	38	1.031648379	15.64684625	0.167355466
aHis-PKIVIT-Flank	35	HPKIVITGPF	72.89440463	70.46089892	36	0.94939203	11.74348315	0.158232005
aHis-PKIVIT-Flank	36	HPKIVITGPD	41.46027059	96.67778829	40	1.673018873	15.28610051	0.26452751
aHis-PKIVIT-Flank	37	HPKIVITGPA	239.7047707	162.4764691	28	0.595532669	30.70516652	0.112545096
aHis-PKIVIT-Flank	38	HPKIVITGPG	517.3984412	286.2060592	33	0.479654421	49.82207991	0.083497117
aHis-PKIVIT-Flank	39	HPKIVITGPI	140.4254392	192.440859	32	1.279402967	34.0190591	0.226168629
aHis-PKIVIT-Flank	40	HPKIVITGPQ	244.4707649	224.3278116	53	0.770366193	30.81379471	0.105817935
aHis-PKIVIT-Flank	41	HPKIVITGPV	51.97834432	220.7971091	31	2.365701489	39.65633147	0.42489253
aHis-PKIVIT-Flank	42	HPKIVITGPY	68.94286661	195.3100971	36	1.714183061	32.55168284	0.285697177
aHis-PKIVIT-Flank	43	HPKIVITGPS	321.4729155	360.3798327	33	0.851847681	62.73407653	0.148287647
aHis-PKIVIT-Flank	44	HSKIVITGPH	77.02550584	140.8767899	42	1.805672357	21.73776062	0.278621294
aHis-PKIVIT-Flank	45	HFKIVITGPH	24.32482836	201.6812321	28	2.361042648	38.1141703	0.44619512
aHis-PKIVIT-Flank	46	HYKIVITGPH	-4.390904825	184.9753645	35	4.732728965	31.26654327	0.799977204
aHis-PKIVIT-Flank	47	HIKIVITGPH	43.85419277	201.1262612	30	2.085664207	36.72046339	0.380788444
aHis-PKIVIT-Flank	48	HPKFVITGPH	849.2131701	384.4818509	31	0.423499235	69.05497896	0.076062708
aHis-PVIVIT-Core	1	HFVIVITGPH	-35.07187517	261.8737996	17	9.326732278	63.51372566	2.262064843
aHis-PVIVIT-Core	2	HLVIVITGPH	-32.22878479	175.5905522	32	7.52556808	31.04031755	1.330345055
aHis-PVIVIT-Core	3	HYVIVITGPH	-49.15815711	129.6094571	14	12.98527081	34.63958447	3.470459602
aHis-PVIVIT-Core	4	HSVIVITGPH	-84.66834836	50.7336827	25	-0.632384438	10.14673654	-0.126476888
aHis-PVIVIT-Core	5	HRVIVITGPH	356.6135198	216.1155279	18	0.505973692	50.93891842	0.119259143
aHis-PVIVIT-Core	6	HIVIVITGPH	-10.1504575	147.4335545	40	3.102514459	23.31129179	0.490550608
aHis-PVIVIT-Core	7	HPTIVITGPH	-49.63732417	184.7379129	26	-8.815563593	36.23008549	-1.728874261
aHis-PVIVIT-Core	8	HPSIVITGPH	-74.44716944	42.08163627	28	-0.579091537	7.952681737	-0.109438014
aHis-PVIVIT-Core	9	HPIIVITGPH	-102.6509234	28.49634277	25	-0.279538313	5.699268554	-0.055907663
aHis-PVIVIT-Core	10	HPNIVITGPH	-86.95495383	78.04635042	36	-1.097949806	13.00772507	-0.182991634
aHis-PVIVIT-Core	11	HPQIVITGPH	-88.15608441	38.53374013	33	-0.422250614	6.707863158	-0.073504397
aHis-PVIVIT-Core	12	HPRIVITGPH	596.0296978	254.9589839	42	0.401085362	39.34102532	0.061888815
aHis-PVIVIT-Core	13	HPYIVITGPH	-95.37370883	230.0985246	29	-6.069875627	42.72822334	-1.127147607
aHis-PVIVIT-Core	14	HPFIVITGPH	-90.30978866	57.89292651	22	-0.759239812	12.3428134	-0.161870472
aHis-PVIVIT-Core	15	HPLIVITGPH	-93.58192831	42.45458427	49	-0.527761173	6.064940611	-0.075394453
aHis-PVIVIT-Core	16	HPAIVITGPH	-12.0957718	71.88351982	29	-21.6845731	13.34843452	-4.026724134
aHis-PVIVIT-Core	17	HPVIVITGPH	-102.0569024	29.27002981	24	-0.301236485	5.974719817	-0.06148964
aHis-PVIVIT-Core	18	HPVFVITGPH	-76.49917009	57.2426499	20	-0.846737731	12.79984564	-0.189336313
aHis-PVIVIT-Core	19	HPVYVITGPH	-123.9333755	60.4371689	11	-0.600407363	18.22249206	-0.181029631
aHis-PVIVIT-Core	20	HPVVVITGPH	-49.36551952	434.6270782	28	10.16973387	82.13679728	1.921899051
aHis-PVIVIT-Core	21	HPVMVITGPH	-62.60460739	45.20817761	24	-0.978628746	9.228080613	-0.199761756
aHis-PVIVIT-Core	22	SCRAMBLED	-106.0109302	84.64673297	19	-1.043868385	19.41929237	-0.239479831
aHis-PVIVIT-Core	23	HPVIYITGPH	-91.64583799	33.1566505	23	-0.358713376	6.913639551	-0.074796909
aHis-PVIVIT-Core	24	HPVIRITGPH	541.7713559	291.6371088	31	0.602918871	52.37957101	0.108287426
aHis-PVIVIT-Core	25	HPVIKITGPH	167.0072029	260.9306603	32	1.106998884	46.12645982	0.195691604
aHis-PVIVIT-Core	26	HPVIIITGPH	-108.8034577	41.94175802	30	-0.409877341	7.657482323	-0.074833022
aHis-PVIVIT-Core	27	HPVIQITGPH	22.47950542	168.1438879	36	3.683362481	28.02398132	0.613893747
aHis-PVIVIT-Core	28	HPVILITGPH	-78.3615596	39.10056621	32	-0.562865529	6.91206888	-0.099501508
aHis-PVIVIT-Core	29	HPVISITGPH	-72.87424677	41.27308159	31	-0.536422686	7.412864285	-0.096344358
aHis-PVIVIT-Core	30	HPVITITGPH	-89.86014174	76.42755669	34	-1.199571828	13.10721784	-0.205724871
aHis-PVIVIT-Core	31	HPVIVDTGPH	-93.18850988	43.54828595	22	-0.517268107	9.284525762	-0.110281931
aHis-PVIVIT-Core	32	HPVIVRTGPH	75.99045422	95.46389266	19	1.316259119	21.90091899	0.301970552
aHis-PVIVIT-Core	33	HPVIVQTGPH	-56.60949139	72.00621415	13	-1.501548321	19.97093056	-0.416454574
aHis-PVIVIT-Core	34	HPVIVETGPH	-116.2971979	52.36946433	34	-0.492496409	8.981289037	-0.084462437
aHis-PVIVIT-Core	35	HPVIVVTGPH	-52.22573906	73.51933565	19	-2.009609016	16.86649234	-0.461035927
aHis-PVIVIT-Core	36	HPVIVLTGPH	-36.80798164	42.43985588	32	-1.183116067	7.502377471	-0.209147348
aHis-PVIVIT-Core	37	HPVIVHTGPH	44.80104152	276.3765029	27	2.441514955	53.18868278	0.469869772
aHis-PVIVIT-Core	38	HPVIVSTGPH	-48.46531739	210.6681533	27	8.515491774	40.54310501	1.638807156
aHis-PVIVIT-Core	39	HPVIFITGPH	-66.42473736	95.76957615	17	-2.307295993	23.22753401	-0.559601476
aHis-PVIVIT-Core	40	HPVIVKTGPH	116.9010954	104.084616	24	0.880092317	21.24618328	0.179648092
aHis-PVIVIT-Core	41	HPVIVIEGPH	-51.25107521	79.73434169	31	-3.922468623	14.32071052	-0.704496162
aHis-PVIVIT-Core	42	HPVIVIHGPH	40.21080721	71.29327491	25	2.141270627	14.25865498	0.428254125
aHis-PVIVIT-Core	43	HPVIVIDGPH	-73.11508053	36.80834568	24	-0.499747145	7.5134721	-0.102010459
aHis-PVIVIT-Core	44	HPVIVIQGPH	-14.96568569	255.6410994	17	6.736603819	62.00207383	1.633866418
aHis-PVIVIT-Core	45	HPVIVISGPH	-50.58850724	27.56903124	13	-0.597130566	7.64627352	-0.165614221
aHis-PVIVIT-Core	46	HPVIVIRGPH	659.3872324	385.2425828	20	0.674832677	86.14286031	0.150897174
aHis-PVIVIT-Core	47	HPVIVIFGPH	-55.35650859	36.17989735	14	-0.7883852	9.669484298	-0.210704808
aHis-PVIVIT-Core	48	HPVIVIKGPH	360.3287594	274.0911115	10	1.017129177	86.67521987	0.321644487
aHis-PVIVIT-Flank	1	HPVIVITGPH	37.986953	265.8254849	27	1.689590224	51.15813842	0.32516179
aHis-PVIVIT-Flank	2	SCRAMBLED	-37.55919558	61.30054583	34	-1.310186064	10.51295688	-0.224695056
aHis-PVIVIT-Flank	3	FPVIVITGPH	-61.84767281	57.13421253	21	-0.85449786	12.46770732	-0.18646672
aHis-PVIVIT-Flank	4	YPVIVITGPH	-36.03855169	77.14439687	41	-3.55740825	12.04793067	-0.555573829
aHis-PVIVIT-Flank	5	IPVIVITGPH	-99.92124858	72.54265957	30	-0.795487586	13.24441701	-0.145235498
aHis-PVIVIT-Flank	6	VPVIVITGPH	-87.80106646	38.27517075	27	-0.426861971	7.366060045	-0.082149625
aHis-PVIVIT-Flank	7	TPVIVITGPH	-35.87603864	83.42314368	27	-4.188506401	16.05479149	-0.806078433
aHis-PVIVIT-Flank	8	QPVIVITGPH	-29.71587547	133.8579059	27	14.6283908	25.760966	2.815235122
aHis-PVIVIT-Flank	9	APVIVITGPH	-4.153579487	157.2736743	45	4.385771406	23.44497512	0.6537922
aHis-PVIVIT-Flank	10	GPVIVITGPH	-75.59793511	200.2900113	33	-5.185705109	34.86601568	-0.90271539
aHis-PVIVIT-Flank	11	NPVIVITGPH	-107.3922987	56.04909519	19	-0.517694631	12.85854431	-0.118767294
aHis-PVIVIT-Flank	12	EPVIVITGPH	-101.3272946	45.27374321	39	-0.440513225	7.249600916	-0.07053857
aHis-PVIVIT-Flank	13	RPVIVITGPH	61.80957885	359.4453519	50	2.163644945	50.83324915	0.305985603
aHis-PVIVIT-Flank	14	HPVIVITMPH	33.68969021	220.498289	37	2.202678103	36.24969541	0.362118049
aHis-PVIVIT-Flank	15	HPVIVITHPH	-26.80908987	83.09683618	40	-3.334052902	13.13876343	-0.52716005
aHis-PVIVIT-Flank	16	HPVIVITSPH	-86.49236586	53.0917594	34	-0.681816162	9.105161619	-0.116930507
aHis-PVIVIT-Flank	17	HPVIVITTPH	-64.09706702	54.32742323	35	-0.750948756	9.183010578	-0.126933507
aHis-PVIVIT-Flank	18	HPVIVITAPH	-71.32288967	56.93134674	21	-0.822326916	12.42343837	-0.179446445
aHis-PVIVIT-Flank	19	HPVIVITDPH	-9.833693802	516.0174239	29	4.873361152	95.82203003	0.904960447
aHis-PVIVIT-Flank	20	HPVIVITNPH	-13.48682058	111.5540529	25	4.699100483	22.31081058	0.939820097
aHis-PVIVIT-Flank	21	HPVIVITKPH	227.7584751	201.1551678	27	1.207312758	38.71233009	0.232347449
aHis-PVIVIT-Flank	22	SCRAMBLED	-41.41855107	82.70827492	17	-6.492130514	20.05970315	-1.574572932
aHis-PVIVIT-Flank	23	HPVIVITEPH	-14.08273405	113.9852744	50	6.842853723	16.1199521	0.967725654
aHis-PVIVIT-Flank	24	HPVIVITGFH	-39.8848943	91.11627221	29	-2.669045722	16.91986698	-0.495629348
aHis-PVIVIT-Flank	25	HPVIVITGDH	-36.30275303	198.0653054	13	14.44456254	54.93343189	4.006200838
aHis-PVIVIT-Flank	26	HPVIVITGYH	69.15904794	304.3236023	35	1.7234319	51.44007746	0.291313161
aHis-PVIVIT-Flank	27	HPVIVITGIH	-26.16534997	54.71294324	31	-3.7921378	9.826734695	-0.681088055
aHis-PVIVIT-Flank	28	HPVIVITGVH	3.415401603	133.4820352	46	3.006643842	19.68085238	0.44330545
aHis-PVIVIT-Flank	29	HPVIVITGLH	-41.48941791	75.7320476	46	-2.656005659	11.16608124	-0.39160667
aHis-PVIVIT-Flank	30	HPVIVITGEH	-106.7949433	34.46304637	31	-0.321448913	6.189745852	-0.057733929
aHis-PVIVIT-Flank	31	HPVIVITGSH	5.201231012	168.6655674	15	3.33040982	43.54926224	0.859908118
aHis-PVIVIT-Flank	32	HPVIVITGTH	-62.01233279	132.0531797	23	-6.299063718	27.53499139	-1.31344558
aHis-PVIVIT-Flank	33	HPVIVITGRH	123.2981884	81.26612573	17	0.625595533	19.7099306	0.151729204
aHis-PVIVIT-Flank	34	HPVIVITGAH	49.33464052	356.9067794	50	2.393753278	50.47424079	0.338527835
aHis-PVIVIT-Flank	35	HPVIVITGPP	-54.5746512	65.45968547	18	-1.878473537	15.42899583	-0.442760459
aHis-PVIVIT-Flank	36	HPVIVITGPT	-88.87699959	51.85876374	37	-0.647497027	8.525528242	-0.106447856
aHis-PVIVIT-Flank	37	HPVIVITGPF	-69.09357119	111.6459892	56	-1.930146744	14.91932287	-0.257926708
aHis-PVIVIT-Flank	38	HPVIVITGPD	-54.48293777	115.7023951	10	-3.791310337	36.58830991	-1.198917598
aHis-PVIVIT-Flank	39	HPVIVITGPA	-72.512872	72.71263239	34	-1.119229761	12.47011358	-0.19194632
aHis-PVIVIT-Flank	40	HPVIVITGPG	-85.38062568	69.7058792	17	-1.180748336	16.90615898	-0.286373536
aHis-PVIVIT-Flank	41	HPVIVITGPI	-36.49203299	52.25585099	29	-1.588513924	9.703667922	-0.29497963
aHis-PVIVIT-Flank	42	HPVIVITGPQ	37.51271192	174.5469857	22	4.085563271	37.21354238	0.871045016
aHis-PVIVIT-Flank	43	HPVIVITGPS	-26.89685131	69.81036335	20	-3.48934415	15.6100718	-0.780241072
aHis-PVIVIT-Flank	44	HPVIVITGPV	-42.41907479	74.05155013	21	-2.633422837	16.15937304	-0.574659976
aHis-PVIVIT-Flank	45	HPVIVITGPY	-50.5870607	112.6984278	25	-6.514773879	22.53968555	-1.302954776
aHis-PVIVIT-Flank	46	HPVIVITQPH	-59.11081234	59.1667322	15	-1.194613135	15.27678456	-0.308447785
aHis-PVIVIT-Flank	47	HPVIVITGPZ	-104.3894523	56.69439584	42	-0.602308195	8.748135202	-0.092938172
aHis-PVIVIT-Flank	48	HPVIVITGPX	-39.92780478	80.47524429	28	-4.536944898	15.20839165	-0.857401994
WT-AKAP79-Core	1	PEAIIITDTEIS	210.0936252	103.6483105	30	0.944425069	18.9235059	0.172427638
WT-AKAP79-Core	2	PFAIIITDTEIS	496.2721843	138.2432786	50	0.363018694	19.55055195	0.051338596
WT-AKAP79-Core	3	PHAIIITDTEIS	781.5557027	207.9479512	39	0.340216702	33.29832151	0.054478272
WT-AKAP79-Core	4	PQAIIITDTEIS	615.2285453	205.1055213	63	0.413821733	25.84086676	0.052136638
WT-AKAP79-Core	5	PYAIIITDTEIS	460.7948903	181.1636072	61	0.477719211	23.19562303	0.061165677
WT-AKAP79-Core	6	PAAIIITDTEIS	470.0559882	137.0573859	45	0.387843378	20.43130878	0.057816277
WT-AKAP79-Core	7	PGAIIITDTEIS	376.9781295	130.757323	75	0.466479627	15.09855513	0.053864428
WT-AKAP79-Core	8	PRAIIITDTEIS	374.3379547	152.792776	69	0.524208835	18.39408868	0.063107328
WT-AKAP79-Core	9	PPAIIITDTEIS	7729.332535	2760.254388	14	0.340284972	737.7090157	0.090944984
WT-AKAP79-Core	10	PPKIIITDTEIS	22565.79621	6492.185808	61	0.284783417	831.2392148	0.03646278
WT-AKAP79-Core	11	PIFIIITDTEIS	255.9306236	121.1445991	83	0.766821187	13.29734727	0.08416956
WT-AKAP79-Core	12	PIPIIITDTEIS	3267.026884	1073.788593	95	0.342007706	110.1683852	0.03508925
WT-AKAP79-Core	13	PIQIIITDTEIS	983.3322134	550.4465789	39	0.531186418	88.14199444	0.0850579
WT-AKAP79-Core	14	PIYIIITDTEIS	250.0226595	160.766441	46	0.858542894	23.70371854	0.126585244
WT-AKAP79-Core	15	PIVIIITDTEIS	316.192294	209.11586	53	0.852209964	28.72427246	0.117060041
WT-AKAP79-Core	16	PIIIIITDTEIS	321.9978582	201.6247811	75	0.764585634	23.28162433	0.088286744
WT-AKAP79-Core	17	PIKIIITDTEIS	1830.526239	904.5894556	60	0.4763978	116.7819966	0.061502692
WT-AKAP79-Core	18	PISIIITDTEIS	547.403503	371.0285338	49	0.65635981	53.00407625	0.093765687
WT-AKAP79-Core	19	PIGIIITDTEIS	530.9982067	153.349806	37	0.370073993	25.21055281	0.06083979
WT-AKAP79-Core	20	PIAFIITDTEIS	401.0884348	170.0404585	32	0.52975492	30.05919033	0.093648324
WT-AKAP79-Core	21	PIAYIITDTEIS	262.8876316	78.23860485	80	0.510222233	8.747341946	0.05704458
WT-AKAP79-Core	22	PIALIITDTEIS	287.0103907	147.6189699	60	0.747164502	19.05752707	0.096458522
WT-AKAP79-Core	23	PIAAIITDTEIS	451.8004089	189.6952305	61	0.515523212	24.28798546	0.066005984
WT-AKAP79-Core	24	PIAVIITDTEIS	440.5952602	151.9682258	22	0.406904212	32.3997346	0.086752269
WT-AKAP79-Core	25	PIAGIITDTEIS	282.1126024	122.5944487	68	0.641404606	14.86676062	0.077781734
WT-AKAP79-Core	26	PIAIHITDTEIS	577.2829496	231.5965884	47	0.504706868	33.78183439	0.073619063
WT-AKAP79-Core	27	PIAIYITDTEIS	407.0211351	158.2823471	92	0.516501956	16.50207543	0.053849051
WT-AKAP79-Core	28	PIAIFITDTEIS	427.4439546	220.1853263	46	0.724894491	32.46455523	0.106879862
WT-AKAP79-Core	29	PIAIQITDTEIS	483.9358482	233.0234283	54	0.564693688	31.71047207	0.076845078
WT-AKAP79-Core	30	PIAIEITDTEIS	346.8099446	281.0095716	57	0.963588834	37.22062703	0.127630459
WT-AKAP79-Core	31	PIAILITDTEIS	381.5470906	244.2457162	31	0.702432214	43.86782563	0.12616055
WT-AKAP79-Core	32	PIAIIITDTEIS	912.7899257	478.201618	38	0.515946958	77.57454606	0.083697649
WT-AKAP79-Core	33	SCRAMBLED	74.70087723	84.70788155	71	-3.495423633	10.05297601	-0.414830466
WT-AKAP79-Core	34	PIAIAITDTEIS	442.9982862	119.2013027	50	0.367075905	16.85760989	0.051912372
WT-AKAP79-Core	35	PIAIIDTDTEIS	252.9449546	190.2052644	28	1.014566574	35.94541625	0.19173506
WT-AKAP79-Core	36	PIAIIFTDTEIS	267.9550647	152.3228888	48	0.74597179	21.98591521	0.107671753
WT-AKAP79-Core	37	PIAIIHTDTEIS	327.4083517	101.5825826	42	0.451972072	15.6745328	0.069740805
WT-AKAP79-Core	38	PIAIILTDTEIS	301.6776239	162.7086039	87	0.73453404	17.44419337	0.078750315
WT-AKAP79-Core	39	PIAIIRTDTEIS	389.7393312	106.1630479	92	0.377948647	11.06826286	0.03940387
WT-AKAP79-Core	40	PIAIISTDTEIS	401.0491054	162.3102129	15	0.573602084	41.90831678	0.148103421
WT-AKAP79-Core	41	PIAIIQTDTEIS	468.0723188	297.1578026	43	0.762259369	45.31614006	0.116243464
WT-AKAP79-Core	42	PIAIIATDTEIS	388.2409927	161.4930949	21	0.500921212	35.24068245	0.10930997
WT-AKAP79-Core	43	PIAIIGTDTEIS	463.5792182	173.3283175	32	0.484252288	30.64040716	0.085604519
WT-AKAP79-Core	44	PIAIIYTDTEIS	203.4274907	136.669131	23	1.243380056	28.49748377	0.259262664
WT-AKAP79-Core	45	PIAIIIEDTEIS	767.9155985	235.2239339	30	0.368231447	42.94581823	0.067229557
WT-AKAP79-Core	46	PIAIIIQDTEIS	323.9221417	146.1929353	27	0.585194935	28.13484353	0.112620818
WT-AKAP79-Core	47	PIAIIIRDTEIS	414.3024715	240.249053	39	0.662980075	38.47063732	0.106161775
WT-AKAP79-Core	48	PIAIIIIDTEIS	224.69605	66.96962037	54	0.617230337	9.113411009	0.08399441
WT-AKAP79-Flank	1	PIAIIITDTEIS	751.4078752	401.315299	54	0.608846432	54.61209492	0.082853505
WT-AKAP79-Flank	2	SCRAMBLED	50.75037036	95.53519721	107	-3.848982904	9.235736113	-0.372095222
WT-AKAP79-Flank	3	HIAIIITDTEIS	245.9139557	220.7599749	99	0.982500234	22.18721229	0.098744989
WT-AKAP79-Flank	4	LIAIIITDTEIS	406.7654536	146.2135912	108	0.450743901	14.06940937	0.043372852
WT-AKAP79-Flank	5	RIAIIITDTEIS	244.3022917	134.8414202	89	0.69933137	14.29316195	0.074128977
WT-AKAP79-Flank	6	YIAIIITDTEIS	227.9950599	209.6642039	116	1.27432451	19.46683263	0.11831806
WT-AKAP79-Flank	7	AIAIIITDTEIS	259.6217707	158.2282046	88	0.754558462	16.86718328	0.080436202
WT-AKAP79-Flank	8	NIAIIITDTEIS	241.849966	135.562593	79	0.745995823	15.25198332	0.083931087
WT-AKAP79-Flank	9	TIAIIITDTEIS	345.3741476	95.25006108	8	0.399842066	33.67598205	0.141365518
WT-AKAP79-Flank	10	PIAIIITQTEIS	730.4349518	382.2297654	57	0.592780359	50.62756922	0.078515677
WT-AKAP79-Flank	11	PIAIIITETEIS	417.9908181	242.2904024	73	0.702819058	28.35794665	0.082258749
WT-AKAP79-Flank	12	PIAIIITFTEIS	438.864022	152.6912502	78	0.40515873	17.28887959	0.045875193
WT-AKAP79-Flank	13	PIAIIITYTEIS	523.2567367	320.1779746	130	0.687597914	28.08146602	0.060306326
WT-AKAP79-Flank	14	PIAIIITRTEIS	3146.48317	1928.108221	110	0.623652912	183.8379057	0.059462972
WT-AKAP79-Flank	15	PIAIIITLTEIS	434.7526619	214.2390796	127	0.569861283	19.01064418	0.050567012
WT-AKAP79-Flank	16	PIAIIITHTEIS	1186.358925	518.1580183	145	0.456457819	43.03068127	0.037906759
WT-AKAP79-Flank	17	PIAIIITATEIS	188.6107805	313.0452631	90	1.726199498	32.99786807	0.181957404
WT-AKAP79-Flank	18	PIAIIITGTEIS	125.575732	203.2885951	69	2.196760085	24.47307095	0.264458837
WT-AKAP79-Flank	19	PIAIIITKTEIS	1673.051942	987.6182137	105	0.604916619	96.38166868	0.059033817
WT-AKAP79-Flank	20	PIAIIITDDEIS	1131.813532	785.7810356	93	0.654115915	81.48169765	0.067828661
WT-AKAP79-Flank	21	PIAIIITDEEIS	921.3633089	451.0488096	75	0.525865928	52.08263033	0.060721767
WT-AKAP79-Flank	22	PIAIIITDHEIS	649.6624679	338.9290819	82	0.548559143	37.42845575	0.060578223
WT-AKAP79-Flank	23	PIAIIITDYEIS	313.2935274	266.0383474	80	1.00216596	29.74399147	0.112045561
WT-AKAP79-Flank	24	PIAIIITDREIS	341.1882218	332.739759	88	1.067431508	35.47017749	0.113788581
WT-AKAP79-Flank	25	PIAIIITDVEIS	215.570885	217.2209141	87	1.37015689	23.28852648	0.146896238
WT-AKAP79-Flank	26	PIAIIITDAEIS	477.502159	343.3094961	83	0.777167806	37.68311278	0.085305249
WT-AKAP79-Flank	27	PIAIIITDGEIS	159.5536714	144.4631199	56	1.305749708	19.30469642	0.174488144
WT-AKAP79-Flank	28	PIAIIITDPEIS	313.6974744	271.0083082	82	1.127216231	29.92786106	0.124480209
WT-AKAP79-Flank	29	PIAIIITDFEIS	238.7512892	357.0843419	95	1.530613349	36.63608047	0.157037616
WT-AKAP79-Flank	30	PIAIIITDQEIS	352.9841856	240.835878	74	0.808637551	27.99660214	0.094002206
WT-AKAP79-Flank	31	PIAIIITDTHIS	320.1521146	227.5433372	61	0.817010758	29.13393895	0.104607508
WT-AKAP79-Flank	32	PIAIIITDTLIS	455.4776249	314.9775002	101	0.761619135	31.34143268	0.075783936
WT-AKAP79-Flank	33	PIAIIITDTFIS	533.7244683	221.5924523	47	0.468260198	32.32258117	0.06830277
WT-AKAP79-Flank	34	PIAIIITDTSIS	903.8199999	363.3247702	77	0.424742675	41.40470026	0.04840392
WT-AKAP79-Flank	35	PIAIIITDTYIS	885.8311825	538.4649829	70	0.644276054	64.35887527	0.077005717
WT-AKAP79-Flank	36	PIAIIITDTPIS	267.9989746	235.006843	89	1.022785925	24.91067553	0.108415091
WT-AKAP79-Flank	37	PIAIIITDTAIS	670.1746206	496.292503	71	0.685890841	58.89908397	0.081400267
WT-AKAP79-Flank	38	PIAIIITDTGIS	541.5816029	220.1811481	83	0.46416175	24.16802078	0.050948371
WT-AKAP79-Flank	39	PIAIIITDTQIS	475.3103787	204.6887948	31	0.518109834	36.76319281	0.093055273
WT-AKAP79-Flank	40	PIAIIITDTDIS	914.3716069	791.4149621	55	0.950564056	106.7143717	0.128174031
WT-AKAP79-Flank	41	PIAIIITDTTIS	706.8246062	414.2536072	95	0.715612843	42.50152333	0.073420329
WT-AKAP79-Flank	42	PIAIIITDTSIS	974.4233801	591.2659592	100	0.665724904	59.12659592	0.06657249
WT-AKAP79-Flank	43	PIAIIITDTZ	124.9810067	206.8904801	76	4.306474465	23.73196566	0.4939865
WT-AKAP79-Flank	44	PIAIIITDTX	157.9079199	317.9425161	73	1.853422478	37.21235682	0.216926693
WT-AKAP79-Flank	45	PIAIIIFDTEIS	286.7238559	137.5292564	73	0.636572977	16.09658195	0.074505231
WT-AKAP79-Flank	46	PIAIIISDTEIS	589.6030598	470.3193911	90	0.941867331	49.57601678	0.099281534
WT-AKAP79-Flank	47	PIAIIIADTEIS	197.1623766	209.0603549	83	1.207565659	22.94735515	0.132547551
WT-AKAP79-Flank	48	PIAIIIHDTEIS	454.3659615	377.2488814	73	0.892038787	44.15364186	0.104405243
WT-NFATc2-Core	1	SFRIEITPSHEL	11.70875988	32.65042151	74	-19.56118853	3.795534404	-2.273941978
WT-NFATc2-Core	2	SHRIEITPSHEL	26.38024565	24.42911679	76	1.440119959	2.802211878	0.165193089
WT-NFATc2-Core	3	SLRIEITPSHEL	19.95600041	11.00710287	92	1.440162662	1.147569802	0.150147337
WT-NFATc2-Core	4	SYRIEITPSHEL	14.04085298	9.033676554	54	-10.25937703	1.22932767	-1.396124377
WT-NFATc2-Core	5	SKRIEITPSHEL	63.40753071	33.41609219	104	0.64567546	3.276717425	0.063313688
WT-NFATc2-Core	6	SARIEITPSHEL	12.90762871	21.82239965	99	-5.550512256	2.193233686	-0.557847471
WT-NFATc2-Core	7	SPEIEITPSHEL	4.993747023	17.17801397	114	-2.543458314	1.608868416	-0.238216697
WT-NFATc2-Core	8	SPGIEITPSHEL	6.835983629	30.25324113	98	-3.384406237	3.056038851	-0.341876657
WT-NFATc2-Core	9	SPLIEITPSHEL	40.1001195	118.5559102	91	1.769952646	12.42803629	0.185541452
WT-NFATc2-Core	10	SPVIEITPSHEL	31.31983573	6252.776772	96	-11.10571704	638.171357	-1.133472499
WT-NFATc2-Core	11	SPYIEITPSHEL	76.26016725	206.9589482	94	1.56237407	21.34618563	0.161146581
WT-NFATc2-Core	12	SPKIEITPSHEL	29.09982445	18.08006995	103	1.095701585	1.781482227	0.107962685
WT-NFATc2-Core	13	SPSIEITPSHEL	15.16024438	16.66167782	97	9.692633175	1.691737068	0.984137792
WT-NFATc2-Core	14	SPAIEITPSHEL	7.585779881	32.02108148	99	-6.614289704	3.218239777	-0.664761127
WT-NFATc2-Core	15	SPRFEITPSHEL	107.762897	112.8931494	84	0.866865094	12.31765244	0.094582736
WT-NFATc2-Core	16	SPRHEITPSHEL	17.94600498	16.2077897	87	2.391139316	1.73765745	0.256357043
WT-NFATc2-Core	17	SPRLEITPSHEL	31.42948368	18.44926858	88	0.921778427	1.966698638	0.09826191
WT-NFATc2-Core	18	SPRYEITPSHEL	16.86564232	14.27677059	84	2.793041367	1.557723378	0.304745797
WT-NFATc2-Core	19	SPRAEITPSHEL	12.26176194	16.2573825	108	-120.5929939	1.56436736	-11.60406625
WT-NFATc2-Core	20	SPRKEITPSHEL	17.7331038	11.28322367	81	3.234255667	1.253691519	0.359361741
WT-NFATc2-Core	21	SPRIDITPSHEL	67.0246081	49.28020764	114	0.766040324	4.615514327	0.07174625
WT-NFATc2-Core	23	SPRIHITPSHEL	5809.513268	9642.595654	84	1.003376591	1052.09344	0.109477361
WT-NFATc2-Core	24	SPRINITPSHEL	1930.394707	1966.618443	78	0.826432348	222.6756897	0.093575037
WT-NFATc2-Core	25	SPRIFITPSHEL	2191.127517	1052.11648	95	0.481340748	107.9448732	0.049384519
WT-NFATc2-Core	26	SPRIVITPSHEL	4538.613318	2408.678091	95	0.51832613	247.1251578	0.053179139
WT-NFATc2-Core	27	SPRILITPSHEL	5188.016829	6871.050212	81	0.914669548	763.4500235	0.10162995
WT-NFATc2-Core	28	SPRIAITPSHEL	605.3507796	621.5440326	99	0.802816793	62.46752566	0.080686124
WT-NFATc2-Core	29	SPRIGITPSHEL	70.52443712	48.56652731	94	0.74802544	5.009254812	0.077152933
WT-NFATc2-Core	30	SPRIEETPSHEL	10.82910962	14.02269954	100	-3.931706942	1.402269954	-0.393170694
WT-NFATc2-Core	31	SPRIEFTPSHEL	69.24828594	48.49719588	84	0.746414082	5.291477884	0.081440453
WT-NFATc2-Core	32	SPRIEHTPSHEL	17.98520279	63.78158645	77	6.244686396	7.26858636	0.711648061
WT-NFATc2-Core	33	SPRIEQTPSHEL	13.38089953	17.15544357	83	-25.64400815	1.883054568	-2.814795578
WT-NFATc2-Core	34	SPRIERTPSHEL	37.35471508	25.80176139	80	1.081493768	2.884724621	0.120914679
WT-NFATc2-Core	35	SPRIEYTPSHEL	42.35024288	32.71266882	90	1.056879399	3.44821806	0.11140487
WT-NFATc2-Core	36	SPRIEATPSHEL	15.03772923	13.7620137	62	8.303461358	1.747777488	1.054540647
WT-NFATc2-Core	37	SPRIEITPSHEL	274.0093364	132.984913	87	0.507515382	14.25747922	0.05441136
WT-NFATc2-Core	38	SPRIEISPSHEL	118.8986826	68.85455145	68	0.621222565	8.349840837	0.075334302
WT-NFATc2-Core	39	SPRIEIEPSHEL	11.54519824	14.85548522	72	-4.795673823	1.750735723	-0.56517558
WT-NFATc2-Core	40	SPRIEIFPSHEL	110.2106315	86.39398095	80	0.861972873	9.659140713	0.096371497
WT-NFATc2-Core	41	SPRIEIHPSHEL	225.3347148	193.5379874	58	0.722104812	25.41278275	0.094817007
WT-NFATc2-Core	42	SPRIEIKPSHEL	43.40042676	20.04011244	66	0.662122076	2.46676732	0.081501593
WT-NFATc2-Core	43	SPRIEILPSHEL	26.56851002	32.19696919	66	1.658249499	3.963172943	0.204116403
WT-NFATc2-Core	44	SPRIEIYPSHEL	129.3884223	53.194406	54	0.465490601	7.238841771	0.063345247
WT-NFATc2-Core	45	SPRIEINPSHEL	24.22657206	49.5184468	71	5.098591901	5.87675844	0.605091535
WT-NFATc2-Core	46	SPRIEIAPSHEL	17.16914585	14.75579086	80	3.267329768	1.649747572	0.365298573
WT-NFATc2-Core	47	Scrambled	11.87319472	23.5443255	81	38.31740197	2.616036167	4.257489108
WT-NFATc2-Core	48	SPRIEIPPSHEL	12.74870967	15.07761482	64	-5.925721394	1.884701853	-0.740715174
WT-NFATc2-Flank	1	SPRIEITPSHEL	1397.983945	654.0906924	88	0.451003717	69.72630209	0.048077158
WT-NFATc2-Flank	2	Scrambled	16.37797789	32.76838577	98	-0.997618045	3.310106827	-0.100774641
WT-NFATc2-Flank	3	FPRIEITPSHEL	3301.797748	1147.791706	69	0.344354013	138.1778837	0.041455352
WT-NFATc2-Flank	4	HPRIEITPSHEL	2472.287929	1543.945339	44	0.501466809	232.7585175	0.075598966
WT-NFATc2-Flank	5	LPRIEITPSHEL	5888.740884	2262.9415	59	0.359216505	294.6098895	0.046766006
WT-NFATc2-Flank	6	YPRIEITPSHEL	5923.14249	1802.346722	68	0.29148394	218.5666444	0.03534762
WT-NFATc2-Flank	7	APRIEITPSHEL	1825.056258	1097.612369	92	0.528994905	114.434	0.055151531
WT-NFATc2-Flank	8	QPRIEITPSHEL	715.0418354	415.0175113	109	0.546141155	39.75146811	0.052310835
WT-NFATc2-Flank	9	KPRIEITPSHEL	3418.05101	2756.133353	82	0.688595082	304.3640122	0.076042606
WT-NFATc2-Flank	10	DPRIEITPSHEL	31.69378593	40.16811354	109	-2.943245406	3.847407497	-0.281911781
WT-NFATc2-Flank	11	GPRIEITPSHEL	833.0859676	541.6519929	87	0.577451482	58.07118911	0.061909297
WT-NFATc2-Flank	12	SPRIEITGSHEL	313.9952971	119.6697511	86	0.424747923	12.90432113	0.045801746
WT-NFATc2-Flank	13	SPRIEITFSHEL	73.48004266	33.48003408	107	1.307412735	3.23663706	0.12639236
WT-NFATc2-Flank	14	SPRIEITHSHEL	1038.981429	350.975624	70	0.346881806	41.9496107	0.041460306
WT-NFATc2-Flank	15	SPRIEITKSHEL	536.8305708	238.9497942	88	0.433263711	25.47213364	0.046186067
WT-NFATc2-Flank	16	SPRIEITQSHEL	341.373217	107.0019965	112	0.356078496	10.1107383	0.033646255
WT-NFATc2-Flank	17	SPRIEITYSHEL	72.14451319	35.60461145	98	1.169915905	3.596608886	0.118179353
WT-NFATc2-Flank	18	SPRIEITNSHEL	202.2419919	73.73059366	49	0.467964038	10.53294195	0.066852005
WT-NFATc2-Flank	19	SPRIEITASHEL	124.4894142	76.15583571	94	0.853913226	7.854874698	0.088074424
WT-NFATc2-Flank	20	SPRIEITGSHEL	328.8839981	148.7068101	78	0.47252141	16.83773059	0.053502514
WT-NFATc2-Flank	21	SPRIEITPEHEL	131.137348	67.78368043	90	0.761786857	7.145027278	0.080299385
WT-NFATc2-Flank	22	SPRIEITPFHEL	3305.085994	2614.591067	57	0.676573295	346.3110469	0.089614322
WT-NFATc2-Flank	23	SPRIEITPHHEL	787.1354843	1123.961092	22	0.901024189	239.62931	0.192099003
WT-NFATc2-Flank	24	SPRIEITPLHEL	437.4446849	235.2994028	70	0.532589622	28.12365779	0.063656635
WT-NFATc2-Flank	25	SPRIEITPQHEL	234.5521997	106.4351652	127	0.527843499	9.444593668	0.046838536
WT-NFATc2-Flank	26	SPRIEITPKHEL	427.9009053	188.249488	108	0.456938101	18.11431543	0.043968889
WT-NFATc2-Flank	27	SPRIEITPRHEL	2281.700528	2142.326101	107	0.747580154	207.1064813	0.072271301
WT-NFATc2-Flank	28	SPRIEITPPHEL	6334.325586	3550.397299	97	0.496667275	360.4882283	0.050428921
WT-NFATc2-Flank	29	SPRIEITPVHEL	2227.846258	1634.003814	43	0.616261479	249.1832455	0.093978994
WT-NFATc2-Flank	30	SPRIEITPAHEL	850.7520519	1678.570489	57	1.188576806	222.3320926	0.157430844
WT-NFATc2-Flank	31	SPRIEITPGHEL	280.5976637	186.0224722	70	0.657285754	22.23393808	0.078560674
WT-NFATc2-Flank	32	SPRIEITPTHEL	687.2192581	471.6490985	95	0.596256418	48.39017649	0.061174618
WT-NFATc2-Flank	33	SPRIEITPDHEL	171.5569039	74.87094481	100	0.548948407	7.487094481	0.054894841
WT-NFATc2-Flank	34	SPRIEITPSDEL	518.2331933	250.2109877	90	0.478716637	26.37455389	0.050461164
WT-NFATc2-Flank	35	SPRIEITPSEEL	238.7666457	129.1375401	82	0.5729838	14.26085562	0.063275475
WT-NFATc2-Flank	36	SPRIEITPSFEL	921.1406308	381.2889676	79	0.412771356	42.89836042	0.046440406
WT-NFATc2-Flank	37	SPRIEITPSYEL	1968.589515	1073.686444	87	0.50773168	115.1112695	0.05443455
WT-NFATc2-Flank	38	SPRIEITPSVEL	412.149163	145.4873341	75	0.393028051	16.7994303	0.04538297
WT-NFATc2-Flank	39	SPRIEITPSQEL	1064.458824	533.0827817	86	0.479884717	57.4837947	0.0517473
WT-NFATc2-Flank	40	SPRIEITPSPEL	1796.453415	1451.433348	80	0.648549025	162.2751816	0.072509985
WT-NFATc2-Flank	41	SPRIEITPSAEL	677.6135093	402.7514185	61	0.629409666	51.56703502	0.08058765
WT-NFATc2-Flank	42	SPRIEITPSGEL	661.806836	276.6379493	73	0.419794313	32.37802294	0.049133208
WT-NFATc2-Flank	43	SPRIEITPSTEL	222.2341892	174.5714039	83	0.937359779	19.16170096	0.102888602
WT-NFATc2-Flank	44	SPRIEITPSSEL	362.4329018	170.0896538	85	0.525868941	18.44881323	0.057038495
WT-NFATc2-Flank	45	SPRIEITPSZEL	3430.177755	1086.087275	74	0.304154833	126.2550811	0.035357281
WT-NFATc2-Flank	46	SPRIEITPSXEL	3018.778475	812.4810264	100	0.285378533	81.24810264	0.028537853
WT-NFATc2-Flank	47	SPRIEIGPSHEL	63.2318296	99.6008027	76	9.608744214	11.42499562	1.102198553
WT-NFATc2-Flank	48	SPRIEGTPSHEL	31.24673286	161.9121943	86	83.86724208	17.45944092	9.043637294
WT-PKIVIT-Core	2	HPKVVITGPH	515.3389518	172.9304362	14	0.341087666	46.21760316	0.091159513
WT-PKIVIT-Core	3	HPKTVITGPH	95.80276728	34.66356453	13	0.813764697	9.613943023	0.225697719
WT-PKIVIT-Core	4	HPKMVITGPH	98.46376262	772.9616853	10	2.628143982	244.431947	0.8310921
WT-PKIVIT-Core	5	HPKIVITGPH	4686.876321	1638.540334	16	0.358439062	409.6350835	0.089609766
WT-PKIVIT-Core	6	Scrambled	2.90814857	20.68226576	17	-0.359690889	5.016186254	-0.087237855
WT-PKIVIT-Core	7	HPKIFITGPH	3894.204027	1401.543163	22	0.340235188	298.8100063	0.072538386
WT-PKIVIT-Core	8	HPKIYITGPH	3521.246427	829.9935384	15	0.249877216	214.3034101	0.06451802
WT-PKIVIT-Core	9	HPKIRITGPH	4533.496149	1664.696176	16	0.362458886	416.1740439	0.090614722
WT-PKIVIT-Core	10	HPKIMITGPH	392.042439	125.083973	21	0.347997176	27.29556069	0.075939209
WT-PKIVIT-Core	11	HPKIGITGPH	103.4860321	35.27980785	20	0.714911788	7.888804859	0.159859136
WT-PKIVIT-Core	12	HPKIIITGPH	6567.003645	2453.375603	16	0.358411544	613.3439007	0.089602886
WT-PKIVIT-Core	13	HPKIQITGPH	509.8963541	173.5357654	28	0.372389578	32.79517705	0.070375015
WT-PKIVIT-Core	14	HPKILITGPH	3097.419068	1106.191646	23	0.323463941	230.6569029	0.067446894
WT-PKIVIT-Core	15	HPKIEITGPH	250.4234519	77.6465797	17	0.421073057	18.83206174	0.102125217
WT-PKIVIT-Core	16	HPKISITGPH	579.6541204	166.1816596	11	0.304159028	50.10565562	0.091707398
WT-PKIVIT-Core	17	HPKIKITGPH	1317.303184	1099.177111	12	0.609195387	317.3051005	0.17585956
WT-PKIVIT-Core	18	HPKIAITGPH	127.3718922	36.22860006	14	0.48209081	9.682500644	0.128844189
WT-PKIVIT-Core	19	HPKIHITGPH	744.4651699	270.5456071	10	0.33917005	85.55403293	0.107254987
WT-PKIVIT-Core	20	HPKIVDTGPH	49.85462433	40.82184666	18	-9.707953435	9.621801531	-2.288186568
WT-PKIVIT-Core	21	HPKIVRTGPH	182.8912498	31.95820299	5	0.291968793	14.29214286	0.130572414
WT-PKIVIT-Core	22	HPKIVQTGPH	51.44804413	22.98822007	15	-5.947430978	5.935532899	-1.535620075
WT-PKIVIT-Core	23	HPKIVETGPH	55.78313518	27.35278424	13	283.7586795	7.586297392	78.7004976
WT-PKIVIT-Core	24	HPKIVVTGPH	3325.147392	1034.156711	21	0.310188339	225.6714956	0.067688645
WT-PKIVIT-Core	25	HPKIVLTGPH	1062.093985	351.2390122	16	0.360550941	87.80975305	0.090137735
WT-PKIVIT-Core	26	HPKIVHTGPH	73.65234292	38.59448534	12	1.629473733	11.14126825	0.470388549
WT-PKIVIT-Core	27	HPKIVATGPH	55.20433272	24.29288785	5	-2.058632634	10.86410972	-0.920648502
WT-PKIVIT-Core	28	HPKIVGTGPH	64.15106898	49.75173611	12	2.265276552	14.36208912	0.653929013
WT-PKIVIT-Core	29	HPKIVYTGPH	113.159976	61.58797863	5	1.291063156	27.54298136	0.577380996
WT-PKIVIT-Core	30	HPKIVSTGPH	71.31426925	26.0066962	9	1.226930749	8.668898734	0.408976916
WT-PKIVIT-Core	31	HPKIVKTGPH	91.98417542	37.77207516	10	1.275892077	11.94457895	0.403472501
WT-PKIVIT-Core	32	HPKIVIEGPH	241.3829275	93.82540274	14	0.509558712	25.07589366	0.136185294
WT-PKIVIT-Core	33	HPKIVIHGPH	3075.178527	972.4126184	7	0.300278084	367.5374229	0.113494448
WT-PKIVIT-Core	34	HPKIVIDGPH	136.3972613	60.39862139	12	0.719590776	17.43558016	0.207727964
WT-PKIVIT-Core	35	HPKIVIQGPH	382.9315886	100.9382519	6	0.307048852	41.20786879	0.125352169
WT-PKIVIT-Core	36	HPKIVISGPH	2979.094631	1213.500136	14	0.371717343	324.3215533	0.099345639
WT-PKIVIT-Core	37	HPKIVIRGPH	662.5666161	125.188851	5	0.207718289	55.98615618	0.092894443
WT-PKIVIT-Core	38	HPKIVIVGPH	353.5101488	138.0491749	21	0.442833216	30.1247997	0.09663413
WT-PKIVIT-Core	39	HPKIVIFGPH	435.3913739	202.6096354	10	0.466527537	64.07079236	0.147528961
WT-PKIVIT-Core	41	HPKIVIAGPH	161.6659492	53.46996893	17	0.480056473	12.96837233	0.116430797
WT-PKIVIT-Core	42	HPKIVIGGPH	75.3764267	76.69509349	6	1.953249317	31.3106408	0.797410695
WT-PKIVIT-Core	43	HPKIVIIGPH	507.7913039	139.2229606	10	0.300227878	44.0261658	0.094940391
WT-PKIVIT-Core	44	HPKIVIKGPH	302.7858154	85.52000482	12	0.336477724	24.6874989	0.097132752
WT-PKIVIT-Core	45	HPKIVILGPH	310.7275703	105.0236986	14	0.406840963	28.06876412	0.108732821
WT-PKIVIT-Core	46	HPKIVIMGPH	335.3006815	221.9417695	10	0.644533911	70.18414994	0.203819519
WT-PKIVIT-Core	47	HPKIVINGPH	962.8400027	355.3350283	6	0.412607694	145.0649179	0.168446386
WT-PKIVIT-Flank	1	HPKIVITGPH	2979.776963	790.2217568	13	0.265685102	219.1680818	0.073687789
WT-PKIVIT-Flank	2	Scrambled	74.45171925	51.58779665	37	1.583476669	8.480981526	0.260321961
WT-PKIVIT-Flank	3	FPKIVITGPH	3075.480258	828.0776686	38	0.276803422	134.3319362	0.044903444
WT-PKIVIT-Flank	4	YPKIVITGPH	3974.767798	731.9544642	26	0.189846916	143.5480806	0.037232043
WT-PKIVIT-Flank	5	IPKIVITGPH	17099.95413	3686.738993	33	0.218941936	641.778882	0.038112899
WT-PKIVIT-Flank	6	VPKIVITGPH	15388.0735	3608.965528	46	0.233558281	532.1129372	0.03443629
WT-PKIVIT-Flank	7	TPKIVITGPH	5247.351973	1439.795783	35	0.262108514	243.3699063	0.044304425
WT-PKIVIT-Flank	8	QPKIVITGPH	1522.751318	406.1211319	35	0.274909982	68.64700051	0.046468268
WT-PKIVIT-Flank	9	APKIVITGPH	3746.95354	951.914804	43	0.274863736	145.1656467	0.041916327
WT-PKIVIT-Flank	10	GPKIVITGPH	905.6000033	203.1462428	39	0.245794457	32.52943282	0.039358613
WT-PKIVIT-Flank	11	NPKIVITGPH	4332.044513	1025.814585	30	0.241592697	187.2872627	0.04410859
WT-PKIVIT-Flank	12	EPKIVITGPH	110.7637733	45.65277039	42	0.766072084	7.044375406	0.118207489
WT-PKIVIT-Flank	13	RPKIVITGPH	4636.336161	1514.937357	46	0.326989918	223.3653274	0.048212033
WT-PKIVIT-Flank	14	HPKIVITHPH	1114.062126	272.9818695	35	0.268728472	46.1423577	0.045423402
WT-PKIVIT-Flank	15	HPKIVITSPH	1387.364681	319.6033296	24	0.236956241	65.23875647	0.04836849
WT-PKIVIT-Flank	16	HPKIVITTPH	1000.593062	431.4167401	41	0.419161253	67.37597524	0.06546199
WT-PKIVIT-Flank	17	HPKIVITAPH	3622.842335	1011.595439	26	0.269619219	198.3901879	0.052876679
WT-PKIVIT-Flank	18	HPKIVITDPH	317.9488955	145.3300677	33	0.474450866	25.29871753	0.082591295
WT-PKIVIT-Flank	19	HPKIVITNPH	470.2996668	170.1244335	28	0.384267146	32.15049593	0.072619665
WT-PKIVIT-Flank	20	HPKIVITKPH	3565.165125	1413.300001	32	0.407413569	249.8385037	0.072021224
WT-PKIVIT-Flank	22	HPKIVITEPH	962.2919242	338.3066818	36	0.360880169	56.38444697	0.060146695
WT-PKIVIT-Flank	23	HPKIVITGFH	145.1369826	63.21077189	40	0.655175187	9.994500592	0.103592293
WT-PKIVIT-Flank	24	HPKIVITGDH	346.262495	118.0777125	33	0.361293523	20.55469142	0.06289313
WT-PKIVIT-Flank	25	HPKIVITGYH	158.1674661	82.46316408	29	0.63035778	15.31302514	0.117054501
WT-PKIVIT-Flank	26	HPKIVITGIH	242.4592568	83.71326306	27	0.417239365	16.11062499	0.080297753
WT-PKIVIT-Flank	27	HPKIVITGVH	492.0030802	129.1515974	32	0.290611744	22.83099259	0.051373384
WT-PKIVIT-Flank	28	HPKIVITGLH	160.8369643	78.15550937	45	0.665764426	11.65073545	0.099246301
WT-PKIVIT-Flank	29	HPKIVITGEH	166.7950839	114.426474	19	0.734252622	26.25123351	0.168449104
WT-PKIVIT-Flank	30	HPKIVITGSH	240.3464631	76.98931559	20	0.389386451	17.21533432	0.087069457
WT-PKIVIT-Flank	31	HPKIVITGTH	361.711693	177.0083879	27	0.470929812	34.06528013	0.090630484
WT-PKIVIT-Flank	32	HPKIVITGRH	632.6518963	222.3773156	44	0.379974426	33.52464172	0.0572833
WT-PKIVIT-Flank	33	HPKIVITGAH	483.1578024	239.9010801	30	0.465214037	43.79974437	0.084936074
WT-PKIVIT-Flank	34	HPKIVITGPT	3014.918703	1094.503664	27	0.351806184	210.6373284	0.067705132
WT-PKIVIT-Flank	35	HPKIVITGPF	2234.931301	664.872342	35	0.31519968	112.3839377	0.05327847
WT-PKIVIT-Flank	36	HPKIVITGPD	5707.926774	1559.157087	43	0.268665098	237.7692268	0.040971043
WT-PKIVIT-Flank	37	HPKIVITGPA	2691.502494	746.2456241	21	0.271976884	162.8441457	0.059350222
WT-PKIVIT-Flank	38	HPKIVITGPG	5009.337319	1245.169263	32	0.241112239	220.1169074	0.042623025
WT-PKIVIT-Flank	39	HPKIVITGPI	3275.888809	1114.161095	42	0.333099633	171.9187893	0.051398389
WT-PKIVIT-Flank	40	HPKIVITGPQ	4400.863336	1187.221543	45	0.272126747	176.9805383	0.04056626
WT-PKIVIT-Flank	41	HPKIVITGPV	2191.331121	856.2472564	43	0.371951554	130.5764824	0.05672208
WT-PKIVIT-Flank	42	HPKIVITGPY	4005.223672	832.7366488	37	0.221624403	136.9010618	0.036434827
WT-PKIVIT-Flank	43	HPKIVITGPS	3394.761872	1598.801293	31	0.449097953	287.1531891	0.080660374
WT-PKIVIT-Flank	44	HSKIVITGPH	145.7517327	216.7899519	44	1.492463871	32.68231494	0.224997394
WT-PKIVIT-Flank	45	HFKIVITGPH	102.0450165	48.35996195	32	1.272511546	8.548914259	0.224950386
WT-PKIVIT-Flank	46	HYKIVITGPH	39.41373161	82.49471606	40	10.35987718	13.04355988	1.638040408
WT-PKIVIT-Flank	47	HIKIVITGPH	110.0328568	53.49291189	31	0.74757264	9.607610596	0.13426801
WT-PKIVIT-Flank	48	HPKFVITGPH	1311.092318	393.1464602	26	0.299893753	77.10236433	0.058814004
WT-PVIVIT-Core	1	HFVIVITGPH	321.1610951	81.18914885	22	0.353662547	17.3095847	0.075401108
WT-PVIVIT-Core	2	HLVIVITGPH	357.308716	1306.498445	47	2.941546396	190.5723846	0.42906864
WT-PVIVIT-Core	3	HYVIVITGPH	198.3974524	628.3970432	43	3.994680946	95.82965068	0.609183133
WT-PVIVIT-Core	4	HSVIVITGPH	332.9632053	95.87083109	43	0.440288263	14.62016468	0.067143331
WT-PVIVIT-Core	5	HRVIVITGPH	1789.67554	819.1443795	41	0.467567137	127.9288593	0.073021719
WT-PVIVIT-Core	6	HIVIVITGPH	468.8343308	1064.24346	56	2.163210431	142.2155144	0.289071153
WT-PVIVIT-Core	7	HPTIVITGPH	7041.689239	2663.395759	56	0.407037465	355.9112291	0.054392669
WT-PVIVIT-Core	8	HPSIVITGPH	5032.598002	2428.921611	45	0.487153537	362.0822556	0.072620562
WT-PVIVIT-Core	9	HPIIVITGPH	6764.892937	2131.011642	40	0.322306649	336.9425255	0.050961156
WT-PVIVIT-Core	10	HPNIVITGPH	2773.095566	1277.92077	71	0.443340177	151.6612931	0.052614799
WT-PVIVIT-Core	11	HPQIVITGPH	6019.916184	3093.63999	73	0.535863084	362.0831735	0.06271803
WT-PVIVIT-Core	12	HPRIVITGPH	31126.32327	9325.404586	68	0.298023788	1130.871415	0.036140693
WT-PVIVIT-Core	13	HPYIVITGPH	3907.4403	1350.6832	69	0.342670236	162.6031493	0.041252649
WT-PVIVIT-Core	14	HPFIVITGPH	3860.795747	2071.875527	43	0.5417623	315.9580558	0.082617976
WT-PVIVIT-Core	15	HPLIVITGPH	9788.349042	5130.066751	80	0.576445505	573.5588992	0.064448567
WT-PVIVIT-Core	16	HPAIVITGPH	5522.093357	2278.37752	62	0.427864229	289.3542344	0.054338811
WT-PVIVIT-Core	17	HPVIVITGPH	5124.811606	1662.516267	42	0.328110252	256.5318293	0.050628511
WT-PVIVIT-Core	18	HPVFVITGPH	1899.172544	916.912874	41	0.529215702	143.1977329	0.082649607
WT-PVIVIT-Core	19	HPVYVITGPH	146.0277169	122.3824666	35	6.450899929	20.68641247	1.090401104
WT-PVIVIT-Core	20	HPVVVITGPH	884.1548327	520.5862079	53	0.549578554	71.5080151	0.07549042
WT-PVIVIT-Core	21	HPVMVITGPH	107.8769415	92.21744671	51	6.602852846	12.9130254	0.924584334
WT-PVIVIT-Core	22	SCRAMBLED	132.7174196	305.5071307	52	5.069417267	42.36621634	0.703001688
WT-PVIVIT-Core	23	HPVIYITGPH	4558.346579	1320.301484	61	0.291322751	169.0472826	0.037300056
WT-PVIVIT-Core	24	HPVIRITGPH	5758.848919	2815.469761	58	0.520944143	369.6892911	0.068403317
WT-PVIVIT-Core	25	HPVIKITGPH	3350.004169	1769.898456	55	0.475460214	238.6530591	0.064111042
WT-PVIVIT-Core	26	HPVIIITGPH	3052.898343	1618.314925	85	0.540232073	175.5308988	0.058596395
WT-PVIVIT-Core	27	HPVIQITGPH	1035.485644	1176.122409	74	1.07452148	136.7214529	0.124910585
WT-PVIVIT-Core	28	HPVILITGPH	4045.655883	1861.03889	57	0.501071659	246.5006228	0.066368563
WT-PVIVIT-Core	29	HPVISITGPH	503.921154	489.1179035	68	1.036661403	59.31425822	0.125713661
WT-PVIVIT-Core	30	HPVITITGPH	2860.481729	1345.923014	59	0.494100938	175.2242515	0.064326463
WT-PVIVIT-Core	31	HPVIVDTGPH	87.01958075	120.2878641	48	-190.1578799	17.36205768	-27.44692579
WT-PVIVIT-Core	32	HPVIVRTGPH	282.6616827	334.1613983	49	1.319647752	47.73734262	0.188521107
WT-PVIVIT-Core	33	HPVIVQTGPH	75.95768926	77.73941096	33	-1.467610702	13.53269444	-0.255478231
WT-PVIVIT-Core	34	HPVIVETGPH	63.09754375	119.4194175	53	-3.831466987	16.40351853	-0.526292466
WT-PVIVIT-Core	35	HPVIVVTGPH	4618.868202	1773.837894	40	0.383790429	280.4683973	0.060682595
WT-PVIVIT-Core	36	HPVIVLTGPH	1943.551173	955.3515465	57	0.497282019	126.5394036	0.065866613
WT-PVIVIT-Core	37	HPVIVHTGPH	163.6376063	169.5808208	61	1.875014245	21.71259919	0.240070974
WT-PVIVIT-Core	38	HPVIVSTGPH	113.8384836	1046.542968	44	4.700233249	157.7722887	0.708586823
WT-PVIVIT-Core	39	HPVIFITGPH	2049.6342	1675.861795	35	0.760531979	283.2723453	0.128553368
WT-PVIVIT-Core	40	HPVIVKTGPH	310.2446255	530.3240302	42	1.629555188	81.83077443	0.251445824
WT-PVIVIT-Core	41	HPVIVIEGPH	803.5322417	391.7217764	47	0.482598767	57.13849358	0.070394265
WT-PVIVIT-Core	42	HPVIVIHGPH	1993.205269	951.49897	43	0.459571873	145.1022326	0.070084054
WT-PVIVIT-Core	43	HPVIVIDGPH	348.8375331	262.3131739	35	1.220813699	44.33901899	0.206355178
WT-PVIVIT-Core	44	HPVIVIQGPH	717.5390914	405.6354914	34	0.663143175	69.56591285	0.113728116
WT-PVIVIT-Core	45	HPVIVISGPH	1811.259549	1230.152357	47	0.645785995	179.4361631	0.094197569
WT-PVIVIT-Core	46	HPVIVIRGPH	1729.652915	1061.510587	51	0.700244463	148.6412134	0.098053838
WT-PVIVIT-Core	47	HPVIVIFGPH	312.4057279	121.9088872	35	0.545665584	20.60636295	0.092234318
WT-PVIVIT-Core	48	HPVIVIKGPH	1303.487853	1543.82322	12	0.989973751	445.6633758	0.285780806
WT-PVIVIT-Flank	1	HPVIVITGPH	1054.908295	4204.312363	22	1.96348576	896.3624075	0.41861657
WT-PVIVIT-Flank	2	SCRAMBLED	200.3041795	201.7569161	37	1.591804756	33.16863269	0.26169109
WT-PVIVIT-Flank	3	FPVIVITGPH	790.4140939	726.8158411	51	0.849663056	101.7745747	0.118976626
WT-PVIVIT-Flank	4	YPVIVITGPH	2464.423932	1061.064409	47	0.464663755	154.7721509	0.067778175
WT-PVIVIT-Flank	5	IPVIVITGPH	6127.77081	3162.445205	30	0.525046605	577.3808586	0.095859956
WT-PVIVIT-Flank	6	VPVIVITGPH	5819.568334	2122.807156	28	0.354923056	401.1728439	0.067074153
WT-PVIVIT-Flank	7	TPVIVITGPH	2150.57207	1387.606826	41	0.612125178	216.707778	0.095597892
WT-PVIVIT-Flank	8	QPVIVITGPH	714.8031041	399.0634301	45	0.648188536	59.4888638	0.096626242
WT-PVIVIT-Flank	9	APVIVITGPH	1390.901529	544.670251	57	0.422333515	72.14333714	0.055939441
WT-PVIVIT-Flank	10	GPVIVITGPH	785.7786418	430.2327789	35	0.551029317	72.72261273	0.093140954
WT-PVIVIT-Flank	11	NPVIVITGPH	2084.798283	1201.430914	30	0.627784285	219.350271	0.114617205
WT-PVIVIT-Flank	12	EPVIVITGPH	168.2755171	121.7946505	53	1.02080266	16.72978187	0.140218029
WT-PVIVIT-Flank	13	RPVIVITGPH	1181.103005	871.2989094	64	0.699696517	108.9123637	0.087462065
WT-PVIVIT-Flank	14	HPVIVITMPH	531.3489862	425.1699706	49	0.798193502	60.73856722	0.114027643
WT-PVIVIT-Flank	15	HPVIVITHPH	1260.166207	804.3426628	42	0.647236242	124.1127674	0.09987072
WT-PVIVIT-Flank	16	HPVIVITSPH	1013.811639	562.3012135	43	0.581229952	85.75013115	0.088636737
WT-PVIVIT-Flank	17	HPVIVITTPH	747.594266	504.1091547	57	0.692572741	66.77088869	0.0917335
WT-PVIVIT-Flank	18	HPVIVITAPH	2763.292345	1469.795612	32	0.561767251	259.8256111	0.099307358
WT-PVIVIT-Flank	19	HPVIVITDPH	488.8165092	338.8991842	47	0.715639351	49.43352663	0.104386728
WT-PVIVIT-Flank	20	HPVIVITNPH	417.6096781	283.1514264	56	0.820778303	37.83770094	0.109681114
WT-PVIVIT-Flank	21	HPVIVITKPH	2275.716228	3519.787635	40	1.431559183	556.5272903	0.226349381
WT-PVIVIT-Flank	22	SCRAMBLED	280.8336789	182.2937046	20	0.810825709	40.76211153	0.18130614
WT-PVIVIT-Flank	23	HPVIVITEPH	1344.697992	584.1309125	67	0.451320894	71.36294901	0.055137623
WT-PVIVIT-Flank	24	HPVIVITGFH	334.1357715	190.0641787	35	0.752620411	32.12670987	0.127216069
WT-PVIVIT-Flank	25	HPVIVITGDH	166.2982412	5803.245272	15	3.52591978	1498.391486	0.910388573
WT-PVIVIT-Flank	26	HPVIVITGYH	294.3013136	267.1779138	43	0.866906899	40.74424987	0.132202063
WT-PVIVIT-Flank	27	HPVIVITGIH	375.5507337	163.7883876	28	0.517053409	30.95309581	0.09771391
WT-PVIVIT-Flank	28	HPVIVITGVH	917.1746565	751.8299833	43	0.777573837	114.6529976	0.118578899
WT-PVIVIT-Flank	29	HPVIVITGLH	356.1998914	238.029338	61	0.770443104	30.47653376	0.098645131
WT-PVIVIT-Flank	30	HPVIVITGEH	293.1009317	349.3703808	38	1.938817384	56.67535967	0.314517711
WT-PVIVIT-Flank	31	HPVIVITGSH	412.953794	322.1581667	22	0.711125131	68.68435193	0.151612387
WT-PVIVIT-Flank	32	HPVIVITGTH	288.566094	281.1320136	33	1.019986817	48.93880195	0.177556914
WT-PVIVIT-Flank	33	HPVIVITGRH	537.7153537	140.1415607	27	0.333085258	26.97025593	0.064102288
WT-PVIVIT-Flank	34	HPVIVITGAH	887.3036683	427.0483566	57	0.547941852	56.56393663	0.072576671
WT-PVIVIT-Flank	35	HPVIVITGPP	1875.972565	1560.702029	39	0.679499104	249.9123345	0.108806937
WT-PVIVIT-Flank	36	HPVIVITGPT	1745.471301	1013.252521	40	0.550657521	160.2092906	0.087066599
WT-PVIVIT-Flank	37	HPVIVITGPF	812.9011584	544.9648259	72	0.647519715	64.22472065	0.07631093
WT-PVIVIT-Flank	38	HPVIVITGPD	1974.233447	2060.676575	17	0.936200195	499.7874811	0.227061899
WT-PVIVIT-Flank	39	HPVIVITGPA	1596.023783	1163.483672	63	0.777138684	146.5851644	0.097910271
WT-PVIVIT-Flank	40	HPVIVITGPG	3126.484306	1668.613133	20	0.651086778	373.1132394	0.145587429
WT-PVIVIT-Flank	41	HPVIVITGPI	2262.674408	1034.887637	23	0.573273308	215.7889892	0.119535748
WT-PVIVIT-Flank	42	HPVIVITGPQ	2842.505803	1801.416892	35	0.702237389	304.4950302	0.118699783
WT-PVIVIT-Flank	43	HPVIVITGPS	1327.084371	1488.652283	48	1.035982042	214.8684491	0.149531128
WT-PVIVIT-Flank	44	HPVIVITGPV	1385.51682	929.1901234	43	0.782430564	141.7001654	0.119319542
WT-PVIVIT-Flank	45	HPVIVITGPY	507.1451205	501.9593606	33	0.940320142	87.37990888	0.163688726
WT-PVIVIT-Flank	46	HPVIVITQPH	373.5536455	576.3665937	42	1.106606243	88.93529621	0.17075305
WT-PVIVIT-Flank	47	HPVIVITGPZ	29647.32105	14531.23994	38	0.565001035	2357.278393	0.091655271
WT-PVIVIT-Flank	48	HPVIVITGPX	19520.47524	8899.154885	48	0.550949564	1284.482367	0.07952272
