# Supplementary material for: Quantitative mapping of protein-peptide affinity landscapes using spectrally encoded beads
Source: eLife journal article supplement (doi:10.7554/elife.40499), 2019-07-08
Supplement: supp [file elife-40499-supp-v1.zip › elife_poa_e40499_Figure_4_source_data_1.csv]

Pos-1
AA	PVIVIT	PKIVIT	IAIIIT	PKIIIT	PRIEIT
A	0.003351374	0.03884587	0.011575124	0.001506529	0.239157442
C	0	0	0	0	0
D	0.000410697	0.001964045	0.029051655	0.000655104	0.015170932
E	0.000470642	0.008990969	0.020671443	0.027566907	0.012517986
F	0.460272648	0.002046286	5.135E-12	0.06639018	0.01164969
G	9.45627E-05	0.000488147	0.001930221	0.00169279	0.002908596
H	0.016322505	0.22293588	1.41421E-06	0.000571223	0.032718279
I	0.002873432	0.002048586	2.65699E-05	0.043157346	1.53569E-16
K	0.001770444	0.001927251	0.004611691	0.012931563	0.000300585
L	0.000129067	8.79863E-17	1.31811E-15	0.030994496	5.2877E-185
M	0.014904591	8.82106E-05	0.00962035	0.015057337	8.34405E-08
N	0.000244518	0.000260334	0.00949428	0.000776848	0.001237787
P	4.52166E-13	2.1209E-124	1.87408E-08	0.000334398	1.83977E-05
Q	0.000423605	8.38165E-05	0.004188956	0.021262532	0.00443066
R	0.001621141	9.9018E-05	0.005679769	0.647556701	0.002844523
S	0.001655392	0.019355132	0.023576765	0.001912521	0.099485892
T	0.028256654	0.003041428	0.868447287	0.055900168	0.000470313
V	0.119577215	0.596544546	0.01112439	0.032046159	0.000129405
W	9.21809E-07	0.028882711	1.69945E-08	0.00121921	0.003115359
Y	0.347620592	0.07239777	4.93671E-08	0.038467989	0.57384407
Pos1
AA	PVIVIT	PKIVIT	IAIIIT	PKIIIT	PRIEIT
A	0.11711581	0.784323639	0.034892947	0.047439161	0.211617775
C	0	0	0	0	0
D	0.000326076	0.000298112	0.080012671	4.09933E-07	3.13906E-07
E	1.9054E-05	0.000989468	0.024123459	2.00953E-08	2.35525E-07
F	0	0	0.007640469	0	3.6654E-120
G	0.001686072	0.003397906	0.002717544	0.000509814	0.001822276
H	3.2912E-166	9.28182E-72	0.015277823	1.0062E-244	4.6475E-122
I	2.6267E-192	1.61534E-48	0.359310488	5.9651E-76	4.56574E-47
K	7.21705E-44	6.1109E-31	0.051692906	2.6074E-167	8.56905E-19
L	1.4606E-289	3.35237E-15	1.38048E-05	1.12391E-38	9.42808E-20
M	9.30741E-33	8.81534E-43	0.003787157	6.56051E-19	9.08747E-19
N	6.6919E-06	0.000118716	0.01308129	4.87919E-10	5.66139E-14
P	0.868237248	0.148290723	0.224095566	0.950253688	0.777833305
Q	1.65456E-18	5.21892E-08	0.011675685	6.13094E-12	2.46976E-09
R	8.23992E-65	5.27363E-60	0.004603858	0	3.42304E-40
S	0.012227899	0.060271067	0.015305149	0.001796558	0.008726087
T	0.000381148	0.002310318	0.021757625	3.48755E-07	5.28218E-09
V	1.4469E-103	4.36041E-41	0.12101434	3.75554E-22	2.94457E-28
W	0	0	2.23046E-18	0	0
Y	0	0	0.008997217	0	2.4087E-174
Pos2
AA	PVIVIT	PKIVIT	IAIIIT	PKIIIT	PRIEIT
A	0.032385972	0.076008585	0.049107124	0.04345471	0.049532634
C	0	0	0	0	0
D	0.037696535	0.067791292	0.043263773	0.030233012	0.040179227
E	0.05634188	0.071608859	0.053042115	0.058440965	0.054116566
F	0.062239596	0.034962245	0.041438761	0.039591702	0.076907224
G	0.010565057	0.021331258	0.012749399	0.00278636	0.005041577
H	0.003018194	0.002939942	0.002427574	0.002713164	0.005238452
I	0.113706295	0.032170884	0.104159947	0.087486784	0.063704432
K	0.062539492	0.079236582	0.071954233	0.114501115	0.098804696
L	0.126353398	0.132542779	0.128361952	0.154916467	0.098752057
M	0.039798571	0.047710658	0.045783578	0.036527819	0.04197035
N	0.050113024	0.083928597	0.059458765	0.031955185	0.048400076
P	1.2011E-115	4.4577E-111	3.07637E-15	7.7551E-145	1.4514E-160
Q	0.104782685	0.102779721	0.102473809	0.097234509	0.086139115
R	0.050251646	0.071714208	0.063232431	0.062750194	0.05952182
S	0.027516049	0.046390295	0.035694513	0.022624694	0.034871708
T	0.031703218	0.034709074	0.038778041	0.051319618	0.042703302
V	0.084198412	0.032636064	0.077015112	0.095426495	0.068761434
W	0.031111816	0.01720829	0.017864562	0.019357082	0.021205264
Y	0.075678159	0.044330667	0.05319431	0.048680127	0.104150065
Pos3
AA	PVIVIT	PKIVIT	IAIIIT	PKIIIT	PRIEIT
A	5.53836E-05	9.61205E-05	0.000362155	0.000165028	3.46499E-05
C	0	0	0	0	0
D	1.50216E-05	2.20657E-05	4.9901E-05	9.60399E-05	0.000132393
E	0.000129991	7.94319E-05	0.000268486	0.000285633	0.000239204
F	4.5893E-115	0	3.4163E-209	2.85812E-18	2.20381E-50
G	7.99745E-07	4.32286E-06	9.72363E-06	8.18694E-06	3.849E-07
H	6.02765E-19	2.32885E-44	7.99139E-22	1.2173E-10	1.18451E-10
I	0.957564908	0.960898985	0.790349933	0.660720367	0.885764212
K	1.97788E-05	4.94543E-06	6.1449E-05	0.000474978	4.67408E-05
L	0.000452201	2.51325E-06	1.41824E-05	0.015169977	0.046694109
M	0.000963804	0.005612184	0.00129743	0.238690246	0.017841482
N	4.3479E-06	7.18213E-06	7.63729E-06	7.35424E-05	6.58917E-05
P	1.39032E-13	3.94946E-19	2.9095E-21	2.52454E-10	1.27435E-27
Q	9.75158E-06	1.36982E-05	4.58401E-05	6.66855E-06	2.42401E-05
R	1.67801E-06	4.02927E-15	1.79308E-06	0.000133185	5.0452E-06
S	2.45271E-05	3.39409E-05	0.000194247	0.000103176	6.05964E-05
T	0.00106637	0.001160664	0.009417602	0.002716215	0.002236629
V	0.039691437	0.031871109	0.197919621	0.081356757	0.046854422
W	1.94988E-76	0.000133162	4.4569E-291	8.03179E-18	4.82183E-50
Y	5.0988E-194	5.96752E-05	3.8061E-247	7.04428E-22	4.2161E-155
Pos4
AA	PVIVIT	PKIVIT	IAIIIT	PKIIIT	PRIEIT
A	0.008476706	0.002529884	0.008992978	0.016783198	0.007149527
C	0	0	0	0	0
D	0.011038403	0.003072648	0.012666502	0.014232079	0.004771206
E	0.023143226	0.007503124	0.019654178	0.065722806	0.023690982
F	0.211202916	0.582487769	0.262811379	0.078095398	0.302572776
G	0.000133548	7.50575E-05	0.000235126	0.000172772	0.000225202
H	0.002653186	0.003156825	0.004874646	0.005178569	0.007478262
I	0.10573067	0.01422902	0.088588388	0.131932618	0.041622924
K	0.080991971	0.012914165	0.053481814	0.082404908	0.045514765
L	0.116341663	0.012996361	0.062406352	0.058838039	0.086097225
M	0.037973235	0.011296516	0.015832977	0.065403133	0.026500286
N	0.014725231	0.003719623	0.015480259	0.0195053	0.007368802
P	1.288E-140	3.1579E-141	7.571E-102	4.8866E-140	1.9908E-217
Q	0.04827634	0.011030824	0.032497148	0.050612719	0.032427716
R	0.038773475	0.006640139	0.025924407	0.102955131	0.043231175
S	0.014449702	0.006553638	0.014594388	0.033334899	0.012995733
T	0.02093138	0.010298831	0.029434721	0.032795111	0.006484072
V	0.063744672	0.011816589	0.076344314	0.134962913	0.03176613
W	0.030190733	0.009020198	0.01613386	0.012180383	0.199506417
Y	0.171222943	0.290658788	0.260046563	0.094890024	0.120596798
Pos5
AA	PVIVIT	PKIVIT	IAIIIT	PKIIIT	PRIEIT
A	0.000692933	0.005363699	0.002007485	0.000882388	0.007358776
C	0	0	0	0	0
D	0.001508424	0.002040312	0.008161471	0.000928681	0.041072584
E	0.003171084	0.009338624	0.001567824	0.003571496	0.047802975
F	6.32324E-17	8.78263E-11	2.5658E-24	2.493E-108	1.61844E-06
G	2.00316E-05	0.000191322	5.42807E-05	7.02873E-05	2.44683E-05
H	1.26527E-06	0.000131519	8.24371E-08	0.000187343	6.06374E-05
I	0.474617074	0.527958743	0.149142286	0.858649653	0.441786275
K	0.002352904	0.007534643	0.000517408	0.001083746	0.015088818
L	0.000118429	0.020448906	3.62331E-08	0.040679841	0.016602181
M	0.005074823	0.009616871	0.001218375	0.000935569	0.053289256
N	0.000433334	0.005728018	0.003283374	0.000613441	0.065655656
P	1.32292E-18	1.84825E-16	1.57619E-27	2.40292E-12	4.88864E-64
Q	0.000667751	0.006930098	0.001266743	0.005230445	0.054614719
R	0.006527923	0.026163275	0.000660536	0.001531527	0.061348712
S	0.002358282	0.007398937	0.009801155	0.00218948	0.026008103
T	0.015116421	0.036166096	0.031197486	0.015285223	0.04209345
V	0.48733932	0.334988936	0.791121457	0.06816088	0.127190389
W	3.61655E-11	4.39933E-11	1.20692E-24	9.44841E-24	8.86326E-07
Y	1.67323E-18	1.02219E-20	4.97712E-40	1.5858E-106	4.95958E-07
Pos6
AA	PVIVIT	PKIVIT	IAIIIT	PKIIIT	PRIEIT
A	0.018041413	0.022444761	0.018028083	0.000514602	0.016851332
C	0	0	0	0	0
D	0.056234984	0.08331524	0.050097083	0.009756482	0.082874503
E	0.216967366	0.35835266	0.356664304	0.006460889	0.102241048
F	9.55295E-05	0.000287567	0.000949952	0.022218932	0.014239846
G	0.005822813	0.002673323	0.003655409	7.09182E-06	0.006853047
H	0.00048493	0.003181113	0.001447101	0.002106658	0.007564238
I	7.10311E-06	0.000617302	0.016016765	0.000211217	0.010687632
K	0.061638709	0.058409895	0.054799636	0.003549068	0.092231677
L	0.037107109	0.019555316	0.027856237	0.003749118	0.043825713
M	0.027555491	0.018913385	0.027485798	0.00122153	0.01735315
N	0.020888682	0.029388308	0.022104523	0.001570735	0.101711615
P	1.324E-103	4.389E-121	1.9881E-110	2.2998E-194	1.18844E-22
Q	0.121192576	0.13298031	0.119922672	0.002992554	0.08245693
R	0.08209649	0.076132557	0.063013597	0.00562892	0.07448609
S	0.154864802	0.10303085	0.06399732	0.004224109	0.096588067
T	0.196346009	0.087043355	0.129372471	0.016557135	0.210544972
V	0.000407767	0.002538282	0.038820444	0.000853329	0.013961045
W	3.64723E-05	0.000210896	0.002366696	0.88467102	0.007886357
Y	0.000211754	0.000924878	0.003401909	0.033706609	0.017642736
Pos7
AA	PVIVIT	PKIVIT	IAIIIT	PKIIIT	PRIEIT
A	4.65516E-56	1.56585E-37	0.009021518	0.004275706	2.03212E-05
C	0	0	0	0	0
D	1.5892E-217	0	0.02146531	0.296397425	1.72178E-57
E	0	0	0.250103108	0.027632004	1.26626E-22
F	0	0	0.015884895	0.003667508	0
G	1	1	0.001304195	0.082458669	0.999112529
H	0	0	0.007350555	0.000872546	0
I	0	0	0.005654764	0.000243587	0
K	0	0	0.252503199	0.010269152	1.17903E-73
L	0	0	0.001040584	0.002124557	6.91691904177745e-323
M	2.77351556530188e-317	0	0.009618898	0.002348861	3.264E-116
N	1.8992E-296	0	0.008664179	0.319245981	2.5422E-229
P	4.2943E-300	4.4739E-208	9.28718E-22	0.007905369	0.000711528
Q	0	0	0.221077441	0.040570569	1.72448E-30
R	0	0	0.069244352	0.007581844	5.9156E-231
S	7.4307E-123	1.8941E-128	0.03929471	0.122633349	0.000155622
T	1.5853E-180	4.2631E-253	0.067353451	0.066678963	2.99306E-22
V	0	0	0.005328675	0.000501268	6.9179E-158
W	0	0	0.00370551	0.000348264	0
Y	0	0	0.011384657	0.004244376	0
Pos8
AA	PVIVIT	PKIVIT	IAIIIT	PKIIIT	PRIEIT
A	0.019279546	0.003527646	0.002111278	NA	0.015616974
C	0	0	0	NA	0
D	0.157646669	0.489616747	0.009357549	NA	0.09752024
E	0.615242868	0.207540766	0.177274818	NA	0.443494533
F	0	4.65512E-14	0.19430102	NA	0.000436743
G	0.000366239	0.000298783	0.000190847	NA	0.001699389
H	1.11484E-49	4.48903E-06	0.056358742	NA	0.000293635
I	0.005526357	0.035384475	0.03143606	NA	0.026182992
K	0.005490188	0.003037541	0.023112276	NA	0.020114038
L	0.000386035	0.014967227	6.30172E-07	NA	0.012485322
M	0.016450692	0.002529234	0.010168124	NA	0.010304972
N	0.000784434	0.003233296	0.002124876	NA	0.011261034
P	0.022294097	0.006048437	1.3447E-224	NA	0.001218434
Q	0.021876156	0.008176385	0.132093813	NA	0.015050438
R	0.000463225	0.00493311	0.070110027	NA	0.013459717
S	0.042378058	0.022300949	0.024714491	NA	0.066449307
T	0.090377243	0.186343475	0.051571483	NA	0.217236024
V	0.001438193	0.01205648	0.067980656	NA	0.046782825
W	0	9.59466E-07	0.007811388	NA	7.11852E-05
Y	5.3244E-168	4.37148E-10	0.139281923	NA	0.0003222
Pos9
AA	PVIVIT	PKIVIT	IAIIIT	PKIIIT	PRIEIT
A	0.012299187	0.005288822	0.003814573	0.024472174	0.030207949
C	0	0	0	0	0
D	0.074042575	0.059747789	0.036794172	0.065816153	0.139635777
E	0.167802447	0.311272905	0.668321189	0.024744859	0.390265887
F	0.000827148	2.31742E-05	9.77449E-08	0.008695975	0.002075495
G	6.1926E-05	2.57475E-05	0.002513002	0.046757751	0.000566361
H	0.201769386	0.350718251	0.001769517	0.000660737	0.139830601
I	0.022005159	0.03721046	0.014077227	4.96239E-05	0.013918339
K	0.005560404	0.005066163	0.029025308	0.028791267	0.012237649
L	0.006353623	0.001798856	0.000204136	0.031626991	0.017901134
M	0.019212229	0.023434028	0.008853981	0.011045216	0.03463325
N	0.001568279	0.002207203	0.003197714	0.066443669	0.006410491
P	0	0	1.8476E-237	4.2491E-05	0
Q	0.040037718	0.059467955	0.137407963	0.043758044	0.131712554
R	0.008122289	0.014468088	0.033893848	0.036097688	0.022454404
S	0.00139581	0.002586488	0.034218817	0.420617941	0.032283235
T	0.00037097	0.001002274	0.015633323	0.176508597	0.007033589
V	0.044559716	0.047159571	0.010228709	6.14365E-05	0.016611992
W	0.393987405	0.078522191	4.27732E-05	0.003604192	0.001637641
Y	2.37298E-05	3.42866E-08	3.64962E-06	0.010205194	0.000583652
