# Supplementary material for: Quantitative mapping of protein-peptide affinity landscapes using spectrally encoded beads
Source: eLife journal article supplement (doi:10.7554/elife.40499), 2019-07-08
Supplement: supp [file elife-40499-supp-v1.zip › elife_poa_e40499_Figure_4_source_data_3.csv]

	A	D	E	F	G	H	I	K	L	M	N	P	Q	R	S	T	V	W	Y
0	1.08821646667	1.66802493333	1.3905062	-0.593182333333	1.82393743333	0.0	-0.55366539	0.538900766667	0.5761094	0.23357154	1.12942316667	1.3009554	0.5734257	1.05457563333	1.48833013333	0.843320966667	0.12498217	-1.07901201	-0.591836212667
1	0.893762233333	2.025862	3.19612204	1.8774071	2.1636672	3.97667903333	1.10273156667	5.238793	0.346775	1.85897033333	2.226693	0.0	3.1143764	3.16364553333	1.87386526667	2.3808446	1.10362983333	3.00540153333	3.1258805
2	0.254097516667	0.41914877	0.160542486667	0.0793842	0.408469595667	0.0175634673333	-0.134904857667	0.00567104666667	0.207815424667	0.292351108667	0.12541916	2.04505263333	0.115783996667	-0.00832462	0.147010413333	0.221103163333	0.0	-0.132528222667	0.104912266667
3	2.409759	3.075004	2.480254	0.0311383166667	3.08713966667	1.13804412	0.0	2.91341410333	0.564251273333	0.78858001	2.156621	2.4243492	1.9971332	1.73662223333	2.55048266667	2.35240016667	1.0981121	0.966972433333	1.49377286667
4	-0.0203489783333	0.0247655733333	-0.148216320767	-0.574326726667	0.504313613333	-0.152325763333	-0.158103106667	-0.219082526667	-0.161997663333	-0.326222542	-0.0790169633333	2.42392906333	0.0296546143333	-0.411965092	-0.00918117333333	0.12085972	0.0	-0.760765240333	-0.477649506667
5	1.4783405	-0.459927166667	0.4394751	1.22172599667	1.92023043333	0.487224693333	0.0	0.991376033333	0.289319518333	0.8681176	1.34014611333	1.8788658	0.370682276333	-0.134561113333	1.68906653333	1.00313526667	0.318090056667	0.989451033333	2.2213531
6	0.0418618633333	-0.544409713333	-1.06459547	-0.122497696667	0.418011523333	-0.720471173333	-0.00706924333333	0.0544580066667	-0.109507623333	-0.0944522606667	-0.271709573333	0.907330166667	-0.528375026667	-0.18287373	0.405628645	0.0	-0.259022157333	-0.58051985	-0.141338033333
7	4.25920733333	5.45160866667	4.89481882667	4.89481882667	0.0	3.03756153333	12.4671870333	6.359233	3.54566743333	4.9888116	5.56891133333	6.373926	4.33357766667	5.39117186667	4.942824	5.2551224	9.56687666667	4.170384	2.97126453333
8	0.438972736667	-0.371244663333	-0.258386263333	-0.740048616667	1.18832071533	0.424438371633	-0.386228056667	0.33787753	-0.380948296667	-0.28404945	0.868605553333	0.0	-0.00688057333333	0.346203759	0.900274963333	-0.27440023	-0.1420635	-0.224650783333	-0.48792107
9	1.53250790667	0.458611313333	0.967131146667	-0.233872107	1.54040186667	0.0	0.829370166667	1.47980025333	0.828040099667	1.20317868994	1.41949732333	4.11165166667	1.03759007667	1.37464186667	1.5543093	1.53228028667	1.26196153333	0.0442837666667	0.596328680333
