# Supplementary material for: Quantitative mapping of protein-peptide affinity landscapes using spectrally encoded beads
Source: eLife journal article supplement (doi:10.7554/elife.40499), 2019-07-08
Supplement: supp [file elife-40499-supp-v1.zip › elife_poa_e40499_Figure_4_source_data_4.csv]

	A	D	E	F	G	H	I	K	L	M	N	P	Q	R	S	T	V	W	Y
0	-0.0193555033333	0.49315561	0.0813024333333	-0.8058126	0.0622989853333	-1.14766636667	-0.78949518	-0.463665393333	-0.87459579	-0.329249783333	-0.293033853333	0.0	-0.233157593333	-0.57325441	-0.0159371966667	-0.65953695	-0.624473533333	-0.746580246667	-0.69873352
1	1.17953196667	1.1919063	-0.6771733	-0.462087616667	2.01024620333	-0.657791033333	0.0	0.984096996667	0.148252813667	0.68647532	1.99734233333	0.88977276	0.104342703333	2.1902256	1.79977671	1.64077723333	0.935876366667	0.104831192333	-1.048437
2	0.0	0.13165426	0.221991261	-0.168659129333	0.335829746667	-0.148190796	0.01970722	-0.0391266233333	-0.00404898333333	0.0262373796667	0.00058097	1.63816250333	-0.199564629033	-0.157021575667	0.1784288	0.318700183333	0.106541188367	-0.180831273333	-0.196795765667
3	1.84759253333	2.36171733333	1.89694653333	-0.265135933333	2.280706	0.86741869	0.0	1.98685096667	0.28869202	0.436890883333	1.83330516667	1.95650083333	1.37980103333	1.4122952	2.31688766667	1.537607	0.546148083333	0.784997995	0.95744062
4	0.05785707	0.40338334	-0.00174821666667	-0.3518545	0.316482426667	-0.40550532	0.0	0.12660663	-0.137502479667	0.0334538046667	0.184697126	1.10303975333	-0.207758321333	0.0895172166667	0.546441113333	0.546820373333	0.265306573333	-0.500128466667	-0.5301674
5	1.13449840667	-0.38992463	0.725396143333	0.380924806667	1.7055238	0.683124733333	0.0	1.02375777767	0.515112293333	0.818260783333	1.33756166667	1.61758746667	1.02317936667	-0.169558126667	0.867050756667	1.1549451	0.285173075	1.57121765667	1.4424385
6	0.16212284	-0.416519366333	-1.26680413667	-0.128203892667	0.06784107	0.181585073333	-0.190183023333	-0.00752109666667	0.03570331	-0.21987934	0.143059966667	1.57639356667	-0.780572261333	-0.210264063333	0.258230961333	0.0	-0.287531043	-0.01740663	0.167615256667
7	-0.0781247333333	0.0	-0.738712833333	-0.792114903333	0.11794294	-0.705878463333	0.220502573333	0.0552880633333	-0.326106176667	-0.360976233333	0.242132946667	0.548147053333	-1.00957805	-0.386022013333	0.518751333333	0.548476376667	0.173571739333	-0.229528646667	-0.71943578
8	0.2156305	-0.781230366667	-1.0032227	-0.402226496667	0.616882766667	-1.19470086497	-0.85749305	-0.244254114667	-0.44496938	-0.656853135	-0.184580843333	2.00645788	-0.26725787	-0.475142743333	0.46825094	0.0	-0.825011433333	-0.6498873	-0.485748283333
9	0.517415526667	0.638696963333	0.0	0.107950253333	0.579952166667	-0.117906033333	0.335345066667	0.459547986667	0.0402687863333	0.53178889	0.488789546667	4.09215923333	0.557881599667	0.648592233333	0.334371426667	0.585580089133	0.358328536667	1.03981067	-0.0176595076667
