# Supplementary material for: Quantitative mapping of protein-peptide affinity landscapes using spectrally encoded beads
Source: eLife journal article supplement (doi:10.7554/elife.40499), 2019-07-08
Supplement: supp [file elife-40499-supp-v1.zip › elife_poa_e40499_Figure_4_source_data_5.csv]

Position	A	A	A	A	A	A	A	A	A	A	C	C	C	C	C	C	C	C	C	C	D	D	D	D	D	D	D	D	D	D	E	E	E	E	E	E	E	E	E	E	F	F	F	F	F	F	F	F	F
-1	-4.73E-01	-4.41E-01	-4.73E-01	-4.73E-01	-5.14E-01	-5.08E-01	-4.73E-01	-4.73E-01	-5.05E-01	-4.54E-01	5.79E-02	6.27E-02	2.45E-02	3.94E-02	5.82E-02	1.15E-02	5.82E-02	-3.54E-01	5.87E-02	5.84E-02	8.43E-01	7.85E-01	8.50E-01	7.34E-01	8.47E-01	7.43E-01	7.43E-01	8.24E-01	8.12E-01	8.42E-01	1.86E-01	2.10E-01	2.07E-01	1.66E-01	1.74E-01	2.17E-01	2.08E-01	1.98E-01	2.20E-01	2.10E-01	5.00E-01	4.97E-01	5.28E-01	5.04E-01	5.22E-01	4.99E-01	5.00E-01	4.97E-01	4.95E-01
1	2.62E+00	2.62E+00	2.62E+00	2.61E+00	2.62E+00	2.62E+00	2.60E+00	2.62E+00	2.62E+00	2.63E+00	3.33E+00	3.15E+00	3.79E+00	3.99E+00	3.36E+00	3.11E+00	3.32E+00	3.17E+00	3.10E+00	3.79E+00	5.31E+00	5.28E+00	5.27E+00	4.31E+00	5.27E+00	5.12E+00	5.42E+00	5.52E+00	5.55E+00	3.70E+00	4.56E+00	4.65E+00	2.23E+00	3.36E+00	4.56E+00	2.41E+00	2.73E+00	2.86E+00	5.33E+00	3.49E+00	1.37E+01	1.25E+01	1.30E+01	1.52E+01	2.57E+01	1.26E+01	9.98E+00	1.35E+01	2.01E+01
2	2.98E-01	3.03E-01	2.93E-01	2.85E-01	2.91E-01	3.03E-01	2.81E-01	3.04E-01	3.03E-01	3.03E-01	5.17E-02	5.16E-02	5.16E-02	5.25E-02	5.16E-02	5.16E-02	5.16E-02	5.17E-02	5.15E-02	4.26E-02	-2.21E-01	-2.43E-01	-2.44E-01	-2.26E-01	-2.37E-01	-2.20E-01	-2.29E-01	-2.39E-01	-2.25E-01	-2.19E-01	-5.97E-01	-6.20E-01	-6.34E-01	-5.94E-01	-6.09E-01	-6.14E-01	-6.02E-01	-6.08E-01	-6.07E-01	-6.37E-01	-6.40E-01	-6.17E-01	-6.18E-01	-6.73E-01	-6.17E-01	-6.49E-01	-6.19E-01	-6.36E-01	-1.00E+00
3	2.18E+00	2.21E+00	2.16E+00	2.10E+00	2.10E+00	2.16E+00	2.28E+00	2.15E+00	2.13E+00	2.17E+00	2.29E+00	2.24E+00	2.19E+00	2.13E+00	2.16E+00	2.28E+00	2.29E+00	2.30E+00	2.22E+00	2.32E+00	2.44E+00	2.42E+00	2.53E+00	2.51E+00	2.85E+00	2.73E+00	2.65E+00	2.51E+00	2.55E+00	2.57E+00	2.61E+00	2.75E+00	2.18E+00	2.90E+00	3.02E+00	1.99E+00	2.88E+00	2.92E+00	2.35E+00	2.72E+00	2.80E+00	2.85E+00	2.81E+00	2.68E+00	2.84E+00	2.32E+00	2.83E+00	2.49E+00	2.69E+00
4	9.76E-01	9.43E-01	9.77E-01	9.91E-01	9.66E-01	9.73E-01	9.56E-01	9.54E-01	9.77E-01	9.89E-01	6.09E-01	6.09E-01	5.53E-01	6.04E-01	6.12E-01	6.14E-01	6.02E-01	6.06E-01	6.00E-01	5.58E-01	6.64E-01	5.52E-01	5.92E-01	6.05E-01	6.07E-01	6.35E-01	5.95E-01	6.16E-01	5.59E-01	6.04E-01	1.51E-01	1.83E-01	1.57E-01	1.53E-01	2.07E-01	2.05E-01	2.13E-01	2.07E-01	1.99E-01	1.95E-01	-8.53E-01	-8.20E-01	-8.35E-01	-7.76E-01	-8.48E-01	-8.37E-01	-8.15E-01	-8.38E-01	-8.29E-01
5	1.75E+00	2.17E+00	2.03E+00	2.06E+00	2.00E+00	2.08E+00	2.18E+00	1.89E+00	1.80E+00	2.29E+00	1.69E+00	1.79E+00	1.79E+00	1.45E+00	1.79E+00	1.75E+00	1.71E+00	1.71E+00	1.72E+00	1.35E+00	2.31E+00	2.40E+00	2.24E+00	2.41E+00	2.36E+00	2.34E+00	2.25E+00	2.24E+00	2.32E+00	2.31E+00	8.69E-01	1.97E+00	1.82E+00	1.71E+00	1.88E+00	1.31E+00	1.81E+00	1.84E+00	1.85E+00	1.22E+00	2.59E+00	2.57E+00	2.88E+00	2.41E+00	2.50E+00	2.70E+00	3.25E+00	2.86E+00	2.45E+00
6	9.52E-01	1.07E+00	1.04E+00	8.44E-01	1.52E+00	1.12E+00	1.16E+00	9.86E-01	1.13E+00	1.07E+00	8.08E-01	8.01E-01	5.92E-01	8.01E-01	8.14E-01	7.91E-01	6.75E-01	8.69E-01	6.67E-01	7.01E-01	9.60E-01	6.19E-01	8.18E-01	8.92E-01	8.42E-01	5.52E-01	7.74E-01	5.78E-01	1.12E+00	4.61E-01	1.07E+00	8.65E-01	1.03E+00	1.03E+00	9.22E-01	1.15E+00	8.07E-01	1.07E+00	4.76E-01	8.90E-01	3.18E-01	2.43E-01	1.99E-01	1.27E-01	2.24E-01	1.88E-01	1.74E-01	2.25E-01	2.09E-01
7	9.85E+00	9.87E+00	9.87E+00	9.83E+00	9.83E+00	9.82E+00	9.91E+00	9.89E+00	9.90E+00	9.88E+00	1.85E+01	1.83E+01	1.86E+01	1.86E+01	1.87E+01	1.86E+01	1.86E+01	1.85E+01	1.85E+01	1.85E+01	3.12E+01	2.24E+01	2.30E+01	3.03E+01	2.30E+01	2.27E+01	3.10E+01	3.09E+01	2.96E+01	2.30E+01	3.68E+01	3.21E+01	3.70E+01	3.74E+01	4.02E+01	3.29E+01	3.37E+01	3.95E+01	3.42E+01	4.04E+01	4.64E+01	5.01E+01	4.49E+01	4.87E+01	4.93E+01	4.99E+01	4.60E+01	4.57E+01	5.07E+01
8	3.00E+00	3.00E+00	3.00E+00	3.00E+00	3.00E+00	3.00E+00	3.00E+00	3.00E+00	3.00E+00	3.00E+00	3.32E+00	3.32E+00	3.32E+00	3.32E+00	3.32E+00	3.32E+00	3.32E+00	3.33E+00	3.32E+00	3.32E+00	2.44E+00	3.48E+00	2.41E+00	2.42E+00	2.40E+00	2.46E+00	2.47E+00	2.60E+00	2.42E+00	2.46E+00	2.71E+00	2.37E+00	3.26E+00	2.84E+00	3.02E+00	3.63E+00	2.79E+00	3.73E+00	2.76E+00	2.55E+00	3.17E+00	3.04E+00	3.05E+00	3.04E+00	3.05E+00	3.04E+00	3.20E+00	3.02E+00	3.03E+00
9	5.46E-01	6.25E-01	6.48E-01	3.42E-01	5.56E-01	5.70E-01	7.22E-01	5.92E-01	5.94E-01	6.17E-01	3.96E-01	5.24E-01	4.81E-01	5.61E-01	4.57E-01	5.42E-01	6.16E-01	6.01E-01	5.54E-01	4.65E-01	1.56E+00	1.47E+00	1.34E+00	6.25E-01	1.04E+00	1.02E+00	9.82E-01	1.21E+00	8.57E-01	1.20E+00	8.75E-01	6.58E-01	7.95E-01	8.88E-01	8.34E-01	8.38E-01	8.94E-01	8.51E-01	8.11E-01	8.64E-01	-2.56E-02	-5.21E-01	-1.04E-01	-3.86E-01	-4.67E-01	-3.98E-01	-2.77E-01	1.01E-01	-9.71E-02
[truncated: 151 more columns]
