# Supplementary material for: Quantitative mapping of protein-peptide affinity landscapes using spectrally encoded beads
Source: eLife journal article supplement (doi:10.7554/elife.40499), 2019-07-08
Supplement: supp [file elife-40499-supp-v1.zip › elife_poa_e40499_Figure_4_source_data_6.csv]

Position	A	A	A	A	A	A	A	A	A	A	C	C	C	C	C	C	C	C	C	C	D	D	D	D	D	D	D	D	D	D	E	E	E	E	E	E	E	E	E	E	F	F	F	F	F	F	F	F	F
-1	-7.66E-02	-7.66E-02	-7.66E-02	-7.66E-02	-7.66E-02	-7.66E-02	-7.66E-02	-7.66E-02	-7.66E-02	-7.66E-02	2.22E-01	2.22E-01	2.22E-01	2.22E-01	2.22E-01	2.22E-01	2.22E-01	2.22E-01	2.22E-01	2.22E-01	1.40E-01	1.72E-01	1.41E-01	1.37E-01	1.20E-01	1.02E-01	1.63E-01	1.46E-01	1.63E-01	2.10E-01	-5.07E-01	-4.35E-01	-5.21E-01	-4.71E-01	-5.55E-01	-5.79E-01	-5.06E-01	-5.26E-01	-6.09E-01	-5.09E-01	3.58E-01	4.10E-01	2.73E-01	2.58E-01	4.14E-01	1.05E-01	4.07E-01	3.28E-01	1.68E-01
1	1.84E+00	1.84E+00	1.84E+00	1.84E+00	1.84E+00	1.84E+00	1.84E+00	1.84E+00	1.84E+00	1.84E+00	2.61E+00	2.51E+00	1.53E+00	1.45E+00	1.59E+00	1.77E+00	1.45E+00	1.65E+00	1.45E+00	2.25E+00	3.36E+00	3.29E+00	3.27E+00	3.28E+00	3.35E+00	3.28E+00	3.37E+00	3.28E+00	3.28E+00	3.29E+00	2.21E+00	2.54E+00	2.59E+00	2.03E+00	2.53E+00	2.68E+00	2.11E+00	2.03E+00	2.54E+00	2.56E+00	1.40E+00	1.49E+00	1.40E+00	1.38E+00	1.39E+00	1.39E+00	1.39E+00	1.38E+00	1.38E+00
2	0.00E+00	0.00E+00	0.00E+00	0.00E+00	0.00E+00	0.00E+00	0.00E+00	0.00E+00	0.00E+00	0.00E+00	-1.08E-01	-1.08E-01	-1.07E-01	-1.07E-01	-1.06E-01	-1.06E-01	-1.07E-01	-1.03E-01	-1.06E-01	-1.09E-01	3.23E-01	3.14E-01	3.11E-01	3.30E-01	3.11E-01	3.36E-01	3.30E-01	3.22E-01	3.31E-01	3.18E-01	-5.24E-01	-4.30E-01	-5.13E-01	-4.39E-01	-5.18E-01	-4.32E-01	-4.28E-01	-4.25E-01	-4.36E-01	-4.34E-01	-5.30E-01	-5.09E-01	-6.11E-01	-5.39E-01	-5.92E-01	-5.96E-01	-6.02E-01	-6.02E-01	-5.50E-01
3	2.98E+00	2.99E+00	2.85E+00	2.55E+00	2.79E+00	2.76E+00	2.84E+00	2.69E+00	2.45E+00	2.79E+00	2.47E+00	2.19E+00	2.60E+00	2.18E+00	2.19E+00	2.50E+00	2.35E+00	2.39E+00	2.49E+00	2.50E+00	3.04E+00	3.03E+00	3.19E+00	2.87E+00	2.88E+00	3.38E+00	3.13E+00	3.37E+00	2.94E+00	2.99E+00	3.29E+00	3.61E+00	3.40E+00	3.41E+00	3.44E+00	3.38E+00	3.41E+00	3.40E+00	3.38E+00	3.42E+00	3.38E+00	3.35E+00	3.62E+00	3.46E+00	3.47E+00	3.38E+00	3.39E+00	3.39E+00	3.45E+00
4	1.16E+00	1.06E+00	1.14E+00	1.21E+00	1.21E+00	1.16E+00	1.24E+00	1.24E+00	1.19E+00	1.28E+00	1.04E+00	1.07E+00	1.08E+00	1.07E+00	1.11E+00	1.07E+00	1.03E+00	1.15E+00	1.19E+00	1.11E+00	9.61E-01	2.02E-01	9.72E-01	2.33E-01	9.92E-01	9.63E-01	9.28E-01	9.41E-01	9.36E-01	9.86E-01	5.98E-01	6.43E-01	5.29E-01	6.11E-01	4.78E-01	6.40E-01	6.71E-01	6.89E-01	7.04E-01	5.82E-01	-2.47E-01	-2.36E-01	-2.40E-01	-2.58E-01	-2.38E-01	-2.64E-01	-2.42E-01	-2.60E-01	-2.37E-01
5	2.33E+00	2.44E+00	2.44E+00	2.59E+00	2.58E+00	2.47E+00	2.54E+00	2.53E+00	2.44E+00	2.58E+00	1.37E+00	1.35E+00	1.38E+00	1.35E+00	1.37E+00	1.38E+00	1.36E+00	1.37E+00	1.37E+00	1.38E+00	2.82E+00	2.82E+00	2.79E+00	2.83E+00	2.79E+00	2.79E+00	2.83E+00	2.83E+00	2.79E+00	2.81E+00	1.61E+00	1.54E+00	1.25E+00	1.56E+00	9.57E-01	1.48E+00	1.27E+00	8.79E-01	1.62E+00	1.55E+00	3.15E+00	2.82E+00	2.95E+00	2.77E+00	3.08E+00	2.48E+00	3.11E+00	2.90E+00	3.05E+00
6	7.60E-01	7.42E-01	7.33E-01	7.23E-01	7.38E-01	7.55E-01	7.40E-01	7.41E-01	7.19E-01	7.57E-01	-1.07E-02	-5.97E-03	-1.27E-02	1.68E-02	7.02E-02	-3.61E-02	1.24E-02	4.78E-02	1.58E-01	-3.89E-03	9.89E-01	1.02E+00	9.67E-01	9.82E-01	1.02E+00	9.74E-01	9.73E-01	1.01E+00	9.46E-01	9.98E-01	3.71E-02	-1.00E+00	-4.97E-01	-7.42E-01	-5.76E-02	-2.89E-01	-7.73E-01	-7.68E-01	-3.94E-02	-8.18E-01	5.09E-02	4.90E-02	2.96E-03	1.41E-02	2.97E-02	5.21E-02	-1.32E-02	6.59E-02	1.01E-01
7	-5.05E-01	-4.28E-01	-5.78E-01	-4.47E-01	-3.89E-01	-4.67E-01	-5.13E-01	-4.78E-01	-5.19E-01	-6.04E-01	-5.35E-01	-5.42E-01	-5.93E-01	-5.96E-01	-5.43E-01	-6.13E-01	-6.07E-01	-5.93E-01	-5.90E-01	-6.48E-01	3.15E-03	-2.22E-02	-1.72E-02	8.12E-02	-9.07E-02	-4.38E-02	-2.58E-03	2.67E-02	-7.34E-02	-8.90E-02	-4.42E-01	-3.94E-01	-9.34E-01	-3.84E-01	-9.56E-01	-8.57E-01	-9.70E-01	-9.19E-01	-9.62E-01	-3.12E-01	-2.26E-01	-3.25E-01	-3.08E-01	-2.40E-01	-4.02E-01	-3.31E-01	-2.96E-01	-2.73E-01	-1.91E-01
8	8.97E-01	8.97E-01	8.99E-01	8.98E-01	8.98E-01	8.98E-01	8.99E-01	9.00E-01	8.97E-01	8.98E-01	1.72E+00	1.72E+00	1.72E+00	1.72E+00	1.72E+00	1.72E+00	1.72E+00	1.72E+00	1.72E+00	1.72E+00	2.80E+00	2.81E+00	2.81E+00	2.81E+00	2.80E+00	2.84E+00	2.85E+00	2.81E+00	2.81E+00	2.84E+00	5.86E-01	6.03E-01	5.37E-01	6.04E-01	5.37E-01	5.91E-01	5.79E-01	5.86E-01	5.85E-01	5.87E-01	3.52E-01	3.53E-01	3.53E-01	3.42E-01	1.66E-01	3.53E-01	3.55E-01	3.52E-01	3.68E-01
9	-1.65E-01	-1.18E-01	-1.81E-01	-1.63E-01	-1.18E-01	-1.17E-01	-1.49E-01	-1.66E-01	-1.77E-01	-1.31E-01	-6.82E-02	-1.65E-01	-1.85E-01	-2.13E-01	-4.81E-01	-4.53E-01	-2.07E-01	-2.52E-01	-2.02E-01	-1.73E-01	3.38E-01	3.37E-01	3.83E-01	3.07E-01	3.95E-01	3.77E-01	3.24E-01	3.10E-01	3.77E-01	3.99E-01	-6.75E-03	-6.75E-03	-6.75E-03	-6.75E-03	-6.75E-03	-6.75E-03	-6.75E-03	-6.75E-03	-6.75E-03	-6.75E-03	1.33E-01	1.80E-01	3.03E-01	1.25E-01	1.54E-01	1.87E-01	2.30E-01	1.87E-01	2.57E-01
[truncated: 151 more columns]
