# Supplementary material for: Quantitative mapping of protein-peptide affinity landscapes using spectrally encoded beads
Source: eLife journal article supplement (doi:10.7554/elife.40499), 2019-07-08
Supplement: supp [file elife-40499-supp-v1.zip › elife_poa_e40499_Figure_5_source_data_1.csv]

	.fitted	Conc	MED	SD	N	CV	SEM	full_sequence	term	kd_nM	kd_error	statistic	p.value	seq	seq_index	CVidx	Rmax	file	ka	ka_error	Conc_uM	kd_uM	kd_error_uM	MED_L10	Conc_L10	lm_x	lm_a	lm_r2	ddG_PVIVIT	ddGE_PVIVIT	ddG_PKIVIT	ddGE_PKIVIT	ddG_PRIEIT	ddGE_PRIEIT	ddG_IAIIIT	ddGE_IAIIIT	kd_true	kdE_true
766	35.8441215	63	209.5	127.8481449	27	4.677371154	25.07308406	SCRAMBLED	Kd	68846.76724	10319.04774	6.671814008	0.001142474	SCRAMBLED	1	full	39206.50904	calibration_redo.csv	1.45E-05	2.18E-06	0.063	68.84676724	10.31904774	2.321184027	-1.200659451	0.419697027	2.815651439	0.950082691	1.314086236	0.181393585	1.23869105	0.227351383	-1.195071372	0.716761822	0.72931541	0.220863858	4585.273914	831.739272
767	71.05535824	125	279.5	152.9036418	13	1.881445663	44.13947937	SCRAMBLED	Kd	68846.76724	10319.04774	6.671814008	0.001142474	SCRAMBLED	1	full	39206.50904	calibration_redo.csv	1.45E-05	2.18E-06	0.125	68.84676724	10.31904774	2.446381812	-0.903089987	0.419697027	2.815651439	0.950082691	1.314086236	0.181393585	1.23869105	0.227351383	-1.195071372	0.716761822	0.72931541	0.220863858	4585.273914	831.739272
768	141.8536301	250	362.5	191.4930692	15	0.89385282	51.17867549	SCRAMBLED	Kd	68846.76724	10319.04774	6.671814008	0.001142474	SCRAMBLED	1	full	39206.50904	calibration_redo.csv	1.45E-05	2.18E-06	0.25	68.84676724	10.31904774	2.559308011	-0.602059991	0.419697027	2.815651439	0.950082691	1.314086236	0.181393585	1.23869105	0.227351383	-1.195071372	0.716761822	0.72931541	0.220863858	4585.273914	831.739272
769	282.6844754	500	494.5	289.6818997	23	0.866803317	61.76038854	SCRAMBLED	Kd	68846.76724	10319.04774	6.671814008	0.001142474	SCRAMBLED	1	full	39206.50904	calibration_redo.csv	1.45E-05	2.18E-06	0.5	68.84676724	10.31904774	2.694166296	-0.301029996	0.419697027	2.815651439	0.950082691	1.314086236	0.181393585	1.23869105	0.227351383	-1.195071372	0.716761822	0.72931541	0.220863858	4585.273914	831.739272
770	561.3217416	1000	538	581.8245043	28	1.04866985	111.9721781	SCRAMBLED	Kd	68846.76724	10319.04774	6.671814008	0.001142474	SCRAMBLED	1	full	39206.50904	calibration_redo.csv	1.45E-05	2.18E-06	1	68.84676724	10.31904774	2.730782276	0	0.419697027	2.815651439	0.950082691	1.314086236	0.181393585	1.23869105	0.227351383	-1.195071372	0.716761822	0.72931541	0.220863858	4585.273914	831.739272
771	1106.797404	2000	1015	2442.238583	15	1.174567275	652.7157167	SCRAMBLED	Kd	68846.76724	10319.04774	6.671814008	0.001142474	SCRAMBLED	1	full	39206.50904	calibration_redo.csv	1.45E-05	2.18E-06	2	68.84676724	10.31904774	3.006466042	0.301029996	0.419697027	2.815651439	0.950082691	1.314086236	0.181393585	1.23869105	0.227351383	-1.195071372	0.716761822	0.72931541	0.220863858	4585.273914	831.739272
772	326.2730253	63	405	151.721825	41	0.666909121	23.9893269	MAGPHPVIVITGPHEE	Kd	7507.377807	767.0151236	9.787783286	0.000189451	HPVIVITGPHEE	2	full	39206.50904	calibration_redo.csv	0.000133202	1.36E-05	0.063	7.507377807	0.767015124	2.607455023	-1.200659451	0.875393489	3.703368538	0.965165504	0	0.144487625	-0.075395186	0.199152435	-2.509157608	0.70832235	-0.584770826	0.191713028	500	72.24381257
773	642.1083644	125	732	295.473155	37	0.533423115	49.24552583	MAGPHPVIVITGPHEE	Kd	7507.377807	767.0151236	9.787783286	0.000189451	HPVIVITGPHEE	2	full	39206.50904	calibration_redo.csv	0.000133202	1.36E-05	0.125	7.507377807	0.767015124	2.864511081	-0.903089987	0.875393489	3.703368538	0.965165504	0	0.144487625	-0.075395186	0.199152435	-2.509157608	0.70832235	-0.584770826	0.191713028	500	72.24381257
774	1263.523255	250	1667	902.9160697	15	0.519046546	241.3144701	MAGPHPVIVITGPHEE	Kd	7507.377807	767.0151236	9.787783286	0.000189451	HPVIVITGPHEE	2	full	39206.50904	calibration_redo.csv	0.000133202	1.36E-05	0.25	7.507377807	0.767015124	3.2219356	-0.602059991	0.875393489	3.703368538	0.965165504	0	0.144487625	-0.075395186	0.199152435	-2.509157608	0.70832235	-0.584770826	0.191713028	500	72.24381257
775	2448.149068	500	3656	956.9154062	13	0.286755882	276.2376837	MAGPHPVIVITGPHEE	Kd	7507.377807	767.0151236	9.787783286	0.000189451	HPVIVITGPHEE	2	full	39206.50904	calibration_redo.csv	0.000133202	1.36E-05	0.5	7.507377807	0.767015124	3.563006187	-0.301029996	0.875393489	3.703368538	0.965165504	0	0.144487625	-0.075395186	0.199152435	-2.509157608	0.70832235	-0.584770826	0.191713028	500	72.24381257
776	4608.530375	1000	5460.5	1810.795469	37	0.350861358	301.7992448	MAGPHPVIVITGPHEE	Kd	7507.377807	767.0151236	9.787783286	0.000189451	HPVIVITGPHEE	2	full	39206.50904	calibration_redo.csv	0.000133202	1.36E-05	1	7.507377807	0.767015124	3.737232411	0	0.875393489	3.703368538	0.965165504	0	0.144487625	-0.075395186	0.199152435	-2.509157608	0.70832235	-0.584770826	0.191713028	500	72.24381257
777	8247.596726	2000	7201.5	2328.828985	25	0.315662137	475.3702259	MAGPHPVIVITGPHEE	Kd	7507.377807	767.0151236	9.787783286	0.000189451	HPVIVITGPHEE	2	full	39206.50904	calibration_redo.csv	0.000133202	1.36E-05	2	7.507377807	0.767015124	3.857422965	0.301029996	0.875393489	3.703368538	0.965165504	0	0.144487625	-0.075395186	0.199152435	-2.509157608	0.70832235	-0.584770826	0.191713028	500	72.24381257
778	463.7129299	63	908	889.1158559	24	1.070417885	185.3934717	MAGPHPRIVITGPHEE	Kd	5263.593049	853.3441617	6.168194833	0.001630723	HPRIVITGPHEE	3	full	39206.50904	calibration_redo.csv	0.000189984	3.08E-05	0.063	5.263593049	0.853344162	2.958085849	-1.200659451	0.758454148	3.813218629	0.902875481	-0.210557911	0.191629527	-0.285953097	0.235599011	-2.719715519	0.719420428	-0.795328737	0.229344908	350.5613534	67.17790618
779	909.479262	125	1150.5	608.1503423	11	0.556937415	192.3140241	MAGPHPRIVITGPHEE	Kd	5263.593049	853.3441617	6.168194833	0.001630723	HPRIVITGPHEE	3	full	39206.50904	calibration_redo.csv	0.000189984	3.08E-05	0.125	5.263593049	0.853344162	3.060886623	-0.903089987	0.758454148	3.813218629	0.902875481	-0.210557911	0.191629527	-0.285953097	0.235599011	-2.719715519	0.719420428	-0.795328737	0.229344908	350.5613534	67.17790618
780	1777.720476	250	1627.5	3071.341867	13	1.361433613	886.6200268	MAGPHPRIVITGPHEE	Kd	5263.593049	853.3441617	6.168194833	0.001630723	HPRIVITGPHEE	3	full	39206.50904	calibration_redo.csv	0.000189984	3.08E-05	0.25	5.263593049	0.853344162	3.211520997	-0.602059991	0.758454148	3.813218629	0.902875481	-0.210557911	0.191629527	-0.285953097	0.235599011	-2.719715519	0.719420428	-0.795328737	0.229344908	350.5613534	67.17790618
781	3401.221139	500	5624.75	1514.131361	18	0.305299196	367.230796	MAGPHPRIVITGPHEE	Kd	5263.593049	853.3441617	6.168194833	0.001630723	HPRIVITGPHEE	3	full	39206.50904	calibration_redo.csv	0.000189984	3.08E-05	0.5	5.263593049	0.853344162	3.750103224	-0.301029996	0.758454148	3.813218629	0.902875481	-0.210557911	0.191629527	-0.285953097	0.235599011	-2.719715519	0.719420428	-0.795328737	0.229344908	350.5613534	67.17790618
782	6259.427892	1000	8139.5	2862.160874	31	0.411332958	522.5566913	MAGPHPRIVITGPHEE	Kd	5263.593049	853.3441617	6.168194833	0.001630723	HPRIVITGPHEE	3	full	39206.50904	calibration_redo.csv	0.000189984	3.08E-05	1	5.263593049	0.853344162	3.910597728	0	0.758454148	3.813218629	0.902875481	-0.210557911	0.191629527	-0.285953097	0.235599011	-2.719715519	0.719420428	-0.795328737	0.229344908	350.5613534	67.17790618
783	10795.34846	2000	8627.5	3272.741754	18	0.432775136	793.7564669	MAGPHPRIVITGPHEE	Kd	5263.593049	853.3441617	6.168194833	0.001630723	HPRIVITGPHEE	3	full	39206.50904	calibration_redo.csv	0.000189984	3.08E-05	2	5.263593049	0.853344162	3.935884968	0.301029996	0.758454148	3.813218629	0.902875481	-0.210557911	0.191629527	-0.285953097	0.235599011	-2.719715519	0.719420428	-0.795328737	0.229344908	350.5613534	67.17790618
784	834.8256901	63	1194.5	335.4728958	43	0.3458442	51.76459164	MAGPHPLIVITGPHEE	Kd	2895.713536	317.259041	9.127284527	0.000264425	HPLIVITGPHEE	4	full	39206.50904	calibration_redo.csv	0.000345338	3.78E-05	0.063	2.895713536	0.317259041	3.077186154	-1.200659451	0.717980351	4.012175988	0.968860667	-0.564924232	0.149806821	-0.640319419	0.203044582	-3.07408184	0.709426501	-1.149695059	0.195753148	192.8578533	28.89142189
785	1622.402645	125	2424.5	1177.553808	33	0.488771328	208.1640707	MAGPHPLIVITGPHEE	Kd	2895.713536	317.259041	9.127284527	0.000264425	HPLIVITGPHEE	4	full	39206.50904	calibration_redo.csv	0.000345338	3.78E-05	0.125	2.895713536	0.317259041	3.384622188	-0.903089987	0.717980351	4.012175988	0.968860667	-0.564924232	0.149806821	-0.640319419	0.203044582	-3.07408184	0.709426501	-1.149695059	0.195753148	192.8578533	28.89142189
786	3115.867719	250	4215	1237.086237	32	0.32144895	222.1872473	MAGPHPLIVITGPHEE	Kd	2895.713536	317.259041	9.127284527	0.000264425	HPLIVITGPHEE	4	full	39206.50904	calibration_redo.csv	0.000345338	3.78E-05	0.25	2.895713536	0.317259041	3.624797579	-0.602059991	0.717980351	4.012175988	0.968860667	-0.564924232	0.149806821	-0.640319419	0.203044582	-3.07408184	0.709426501	-1.149695059	0.195753148	192.8578533	28.89142189
787	5772.941184	500	6980	1574.343822	43	0.238099002	242.9265257	MAGPHPLIVITGPHEE	Kd	2895.713536	317.259041	9.127284527	0.000264425	HPLIVITGPHEE	4	full	39206.50904	calibration_redo.csv	0.000345338	3.78E-05	0.5	2.895713536	0.317259041	3.843855423	-0.301029996	0.717980351	4.012175988	0.968860667	-0.564924232	0.149806821	-0.640319419	0.203044582	-3.07408184	0.709426501	-1.149695059	0.195753148	192.8578533	28.89142189
788	10064.01232	1000	11544	2686.100119	57	0.238258956	358.9452268	MAGPHPLIVITGPHEE	Kd	2895.713536	317.259041	9.127284527	0.000264425	HPLIVITGPHEE	4	full	39206.50904	calibration_redo.csv	0.000345338	3.78E-05	1	2.895713536	0.317259041	4.062356318	0	0.717980351	4.012175988	0.968860667	-0.564924232	0.149806821	-0.640319419	0.203044582	-3.07408184	0.709426501	-1.149695059	0.195753148	192.8578533	28.89142189
789	16016.66795	2000	13725.25	4123.875164	18	0.309966752	1000.18664	MAGPHPLIVITGPHEE	Kd	2895.713536	317.259041	9.127284527	0.000264425	HPLIVITGPHEE	4	full	39206.50904	calibration_redo.csv	0.000345338	3.78E-05	2	2.895713536	0.317259041	4.137520264	0.301029996	0.717980351	4.012175988	0.968860667	-0.564924232	0.149806821	-0.640319419	0.203044582	-3.07408184	0.709426501	-1.149695059	0.195753148	192.8578533	28.89142189
790	15.04185299	63	152	27.52069928	24	-0.328932661	5.738462485	MAGPHPVIVIEGPHEE	Kd	164146.1616	34657.35536	4.736257568	0.005167251	HPVIVIEGPHEE	5	full	39206.50904	calibration_redo.csv	6.09E-06	1.29E-06	0.063	164.1461616	34.65735536	2.181843588	-1.200659451	0.268475014	2.452901686	0.797383534	1.829328512	0.23455754	1.753933326	0.271665711	-0.679829096	0.732025353	1.244557686	0.266260119	10932.32323	2564.258848
791	29.83368219	125	158.5	33.5977267	59	-0.435471414	4.411597645	MAGPHPVIVIEGPHEE	Kd	164146.1616	34657.35536	4.736257568	0.005167251	HPVIVIEGPHEE	5	full	39206.50904	calibration_redo.csv	6.09E-06	1.29E-06	0.125	164.1461616	34.65735536	2.200029267	-0.903089987	0.268475014	2.452901686	0.797383534	1.829328512	0.23455754	1.753933326	0.271665711	-0.679829096	0.732025353	1.244557686	0.266260119	10932.32323	2564.258848
792	59.6219958	250	199.5	40.92759486	57	-1.097048158	5.469179915	MAGPHPVIVIEGPHEE	Kd	164146.1616	34657.35536	4.736257568	0.005167251	HPVIVIEGPHEE	5	full	39206.50904	calibration_redo.csv	6.09E-06	1.29E-06	0.25	164.1461616	34.65735536	2.2999429	-0.602059991	0.268475014	2.452901686	0.797383534	1.829328512	0.23455754	1.753933326	0.271665711	-0.679829096	0.732025353	1.244557686	0.266260119	10932.32323	2564.258848
793	119.0629306	500	179.5	61.65819486	42	-0.851296576	9.629392242	MAGPHPVIVIEGPHEE	Kd	164146.1616	34657.35536	4.736257568	0.005167251	HPVIVIEGPHEE	5	full	39206.50904	calibration_redo.csv	6.09E-06	1.29E-06	0.5	164.1461616	34.65735536	2.254064453	-0.301029996	0.268475014	2.452901686	0.797383534	1.829328512	0.23455754	1.753933326	0.271665711	-0.679829096	0.732025353	1.244557686	0.266260119	10932.32323	2564.258848
794	237.4049063	1000	281	244.5425883	20	2.831992916	56.10191736	MAGPHPVIVIEGPHEE	Kd	164146.1616	34657.35536	4.736257568	0.005167251	HPVIVIEGPHEE	5	full	39206.50904	calibration_redo.csv	6.09E-06	1.29E-06	1	164.1461616	34.65735536	2.44870632	0	0.268475014	2.452901686	0.797383534	1.829328512	0.23455754	1.753933326	0.271665711	-0.679829096	0.732025353	1.244557686	0.266260119	10932.32323	2564.258848
795	471.9520289	2000	404	96.16965442	12	0.567512099	28.99624181	MAGPHPVIVIEGPHEE	Kd	164146.1616	34657.35536	4.736257568	0.005167251	HPVIVIEGPHEE	5	full	39206.50904	calibration_redo.csv	6.09E-06	1.29E-06	2	164.1461616	34.65735536	2.606381365	0.301029996	0.268475014	2.452901686	0.797383534	1.829328512	0.23455754	1.753933326	0.271665711	-0.679829096	0.732025353	1.244557686	0.266260119	10932.32323	2564.258848
796	64.84279864	63	235.5	45.44198939	25	-6.346646563	9.275807242	MAGPHPVIVLTGPHEE	Kd	38029.28043	2538.486024	14.98108718	2.40E-05	HPVIVLTGPHEE	6	full	39206.50904	calibration_redo.csv	2.63E-05	1.76E-06	0.063	38.02928043	2.538486024	2.371990911	-1.200659451	0.599418926	3.025537628	0.966951223	0.962124803	0.122041018	0.886729616	0.18351847	-1.547032806	0.704086562	0.377353976	0.175417278	2532.793833	309.1047389
797	128.4472823	125	293.75	1019.115062	28	4.097239102	196.128785	MAGPHPVIVLTGPHEE	Kd	38029.28043	2538.486024	14.98108718	2.40E-05	HPVIVLTGPHEE	6	full	39206.50904	calibration_redo.csv	2.63E-05	1.76E-06	0.125	38.02928043	2.538486024	2.467977875	-0.903089987	0.599418926	3.025537628	0.966951223	0.962124803	0.122041018	0.886729616	0.18351847	-1.547032806	0.704086562	0.377353976	0.175417278	2532.793833	309.1047389
798	256.0556821	250	403.5	99.91857817	26	0.527649646	19.98371563	MAGPHPVIVLTGPHEE	Kd	38029.28043	2538.486024	14.98108718	2.40E-05	HPVIVLTGPHEE	6	full	39206.50904	calibration_redo.csv	2.63E-05	1.76E-06	0.25	38.02928043	2.538486024	2.605843539	-0.602059991	0.599418926	3.025537628	0.966951223	0.962124803	0.122041018	0.886729616	0.18351847	-1.547032806	0.704086562	0.377353976	0.175417278	2532.793833	309.1047389
799	508.7884928	500	660.5	286.5684461	35	0.577992025	49.14608305	MAGPHPVIVLTGPHEE	Kd	38029.28043	2538.486024	14.98108718	2.40E-05	HPVIVLTGPHEE	6	full	39206.50904	calibration_redo.csv	2.63E-05	1.76E-06	0.5	38.02928043	2.538486024	2.819872822	-0.301029996	0.599418926	3.025537628	0.966951223	0.962124803	0.122041018	0.886729616	0.18351847	-1.547032806	0.704086562	0.377353976	0.175417278	2532.793833	309.1047389
800	1004.540914	1000	971.25	404.9635186	24	0.501140788	84.44073079	MAGPHPVIVLTGPHEE	Kd	38029.28043	2538.486024	14.98108718	2.40E-05	HPVIVLTGPHEE	6	full	39206.50904	calibration_redo.csv	2.63E-05	1.76E-06	1	38.02928043	2.538486024	2.987331032	0	0.599418926	3.025537628	0.966951223	0.962124803	0.122041018	0.886729616	0.18351847	-1.547032806	0.704086562	0.377353976	0.175417278	2532.793833	309.1047389
801	1958.891522	2000	1898	411.4177685	9	0.241662963	145.458147	MAGPHPVIVLTGPHEE	Kd	38029.28043	2538.486024	14.98108718	2.40E-05	HPVIVLTGPHEE	6	full	39206.50904	calibration_redo.csv	2.63E-05	1.76E-06	2	38.02928043	2.538486024	3.278296208	0.301029996	0.599418926	3.025537628	0.966951223	0.962124803	0.122041018	0.886729616	0.18351847	-1.547032806	0.704086562	0.377353976	0.175417278	2532.793833	309.1047389
802	3019.565419	63	4575.5	1213.420164	51	0.299998441	171.6035252	MAGPIPVIVITGPHEE	Kd	755.0018401	84.88059189	8.894870115	0.000298897	IPVIVITGPHEE	7	full	39206.50904	calibration_redo.csv	0.0013245	0.000148906	0.063	0.75500184	0.084880592	3.66043856	-1.200659451	0.511743696	4.317562303	0.956844341	-1.362074353	0.15191304	-1.437469539	0.204603495	-3.871231961	0.709874249	-1.946845179	0.19736966	50.28399126	7.638793958
803	5569.094752	125	6683.5	1821.250534	18	0.277071195	441.7181365	MAGPIPVIVITGPHEE	Kd	755.0018401	84.88059189	8.894870115	0.000298897	IPVIVITGPHEE	7	full	39206.50904	calibration_redo.csv	0.0013245	0.000148906	0.125	0.75500184	0.084880592	3.825003952	-0.903089987	0.511743696	4.317562303	0.956844341	-1.362074353	0.15191304	-1.437469539	0.204603495	-3.871231961	0.709874249	-1.946845179	0.19736966	50.28399126	7.638793958
804	9752.845087	250	12388	5083.255757	37	0.445754847	847.2092928	MAGPIPVIVITGPHEE	Kd	755.0018401	84.88059189	8.894870115	0.000298897	IPVIVITGPHEE	7	full	39206.50904	calibration_redo.csv	0.0013245	0.000148906	0.25	0.75500184	0.084880592	4.093001197	-0.602059991	0.511743696	4.317562303	0.956844341	-1.362074353	0.15191304	-1.437469539	0.204603495	-3.871231961	0.709874249	-1.946845179	0.19736966	50.28399126	7.638793958
805	15620.10022	500	16485	4418.688821	43	0.265689906	681.8184875	MAGPIPVIVITGPHEE	Kd	755.0018401	84.88059189	8.894870115	0.000298897	IPVIVITGPHEE	7	full	39206.50904	calibration_redo.csv	0.0013245	0.000148906	0.5	0.75500184	0.084880592	4.217088951	-0.301029996	0.511743696	4.317562303	0.956844341	-1.362074353	0.15191304	-1.437469539	0.204603495	-3.871231961	0.709874249	-1.946845179	0.19736966	50.28399126	7.638793958
806	22339.86777	1000	19697	5909.374272	57	0.298879877	789.6733534	MAGPIPVIVITGPHEE	Kd	755.0018401	84.88059189	8.894870115	0.000298897	IPVIVITGPHEE	7	full	39206.50904	calibration_redo.csv	0.0013245	0.000148906	1	0.75500184	0.084880592	4.294400085	0	0.511743696	4.317562303	0.956844341	-1.362074353	0.15191304	-1.437469539	0.204603495	-3.871231961	0.709874249	-1.946845179	0.19736966	50.28399126	7.638793958
807	28462.05652	2000	26962.5	6567.906621	14	0.249894873	1821.609546	MAGPIPVIVITGPHEE	Kd	755.0018401	84.88059189	8.894870115	0.000298897	IPVIVITGPHEE	7	full	39206.50904	calibration_redo.csv	0.0013245	0.000148906	2	0.75500184	0.084880592	4.430760158	0.301029996	0.511743696	4.317562303	0.956844341	-1.362074353	0.15191304	-1.437469539	0.204603495	-3.871231961	0.709874249	-1.946845179	0.19736966	50.28399126	7.638793958
808	31.26588218	63	183.5	31.93977337	57	-0.59700511	4.268131748	MAGPHPVIVITGLHEE	Kd	78937.17197	9478.208871	8.32827943	0.000408015	HPVIVITGLHEE	8	full	39206.50904	calibration_redo.csv	1.27E-05	1.52E-06	0.063	78.93717197	9.478208871	2.263636069	-1.200659451	0.459541114	2.743460566	0.933894061	1.395190238	0.157657284	1.319795051	0.208903896	-1.11396737	0.711125654	0.810419412	0.201824256	5257.306479	828.852659
809	61.98683273	125	193.5	132.4135083	58	-1.984748283	17.53859762	MAGPHPVIVITGLHEE	Kd	78937.17197	9478.208871	8.32827943	0.000408015	HPVIVITGLHEE	8	full	39206.50904	calibration_redo.csv	1.27E-05	1.52E-06	0.125	78.93717197	9.478208871	2.286680969	-0.903089987	0.459541114	2.743460566	0.933894061	1.395190238	0.157657284	1.319795051	0.208903896	-1.11396737	0.711125654	0.810419412	0.201824256	5257.306479	828.852659
810	123.7779683	250	289.25	1563.919249	32	4.758073396	280.8881891	MAGPHPVIVITGLHEE	Kd	78937.17197	9478.208871	8.32827943	0.000408015	HPVIVITGLHEE	8	full	39206.50904	calibration_redo.csv	1.27E-05	1.52E-06	0.25	78.93717197	9.478208871	2.461273368	-0.602059991	0.459541114	2.743460566	0.933894061	1.395190238	0.157657284	1.319795051	0.208903896	-1.11396737	0.711125654	0.810419412	0.201824256	5257.306479	828.852659
811	246.776843	500	328.5	157.1487219	34	1.935539412	27.35608115	MAGPHPVIVITGLHEE	Kd	78937.17197	9478.208871	8.32827943	0.000408015	HPVIVITGLHEE	8	full	39206.50904	calibration_redo.csv	1.27E-05	1.52E-06	0.5	78.93717197	9.478208871	2.516535374	-0.301029996	0.459541114	2.743460566	0.933894061	1.395190238	0.157657284	1.319795051	0.208903896	-1.11396737	0.711125654	0.810419412	0.201824256	5257.306479	828.852659
812	490.466551	1000	556.5	378.5612705	35	0.839408563	64.92272228	MAGPHPVIVITGLHEE	Kd	78937.17197	9478.208871	8.32827943	0.000408015	HPVIVITGLHEE	8	full	39206.50904	calibration_redo.csv	1.27E-05	1.52E-06	1	78.93717197	9.478208871	2.745465169	0	0.459541114	2.743460566	0.933894061	1.395190238	0.157657284	1.319795051	0.208903896	-1.11396737	0.711125654	0.810419412	0.201824256	5257.306479	828.852659
813	968.8134162	2000	878.5	235.282579	19	0.343755546	55.45663569	MAGPHPVIVITGLHEE	Kd	78937.17197	9478.208871	8.32827943	0.000408015	HPVIVITGLHEE	8	full	39206.50904	calibration_redo.csv	1.27E-05	1.52E-06	2	78.93717197	9.478208871	2.943741766	0.301029996	0.459541114	2.743460566	0.933894061	1.395190238	0.157657284	1.319795051	0.208903896	-1.11396737	0.711125654	0.810419412	0.201824256	5257.306479	828.852659
814	71.42279951	63	85.5	65.14568533	21	-0.512285861	14.56701808	MAGPHPVIVITMPHEE	Kd	34519.93551	437.6305223	78.87917718	6.21E-09	HPVIVITMPHEE	9	full	39206.50904	calibration_redo.csv	2.90E-05	3.67E-07	0.063	34.51993551	0.437630522	1.931966115	-1.200659451	0.935768862	3.037795021	0.99888327	0.904710897	0.102951731	0.82931571	0.171417845	-1.604446711	0.701029911	0.31994007	0.162715304	2299.067424	236.6929706
815	141.4582985	125	150.5	79.55455105	19	-1.318967251	18.75118751	MAGPHPVIVITMPHEE	Kd	34519.93551	437.6305223	78.87917718	6.21E-09	HPVIVITMPHEE	9	full	39206.50904	calibration_redo.csv	2.90E-05	3.67E-07	0.125	34.51993551	0.437630522	2.1775365	-0.903089987	0.935768862	3.037795021	0.99888327	0.904710897	0.102951731	0.82931571	0.171417845	-1.604446711	0.701029911	0.31994007	0.162715304	2299.067424	236.6929706
816	281.899495	250	293.5	84.44410503	20	1.127048449	19.37280633	MAGPHPVIVITMPHEE	Kd	34519.93551	437.6305223	78.87917718	6.21E-09	HPVIVITMPHEE	9	full	39206.50904	calibration_redo.csv	2.90E-05	3.67E-07	0.25	34.51993551	0.437630522	2.467608106	-0.602059991	0.935768862	3.037795021	0.99888327	0.904710897	0.102951731	0.82931571	0.171417845	-1.604446711	0.701029911	0.31994007	0.162715304	2299.067424	236.6929706
817	559.7741468	500	577.5	254.9614481	5	0.702179697	127.480724	MAGPHPVIVITMPHEE	Kd	34519.93551	437.6305223	78.87917718	6.21E-09	HPVIVITMPHEE	9	full	39206.50904	calibration_redo.csv	2.90E-05	3.67E-07	0.5	34.51993551	0.437630522	2.761551989	-0.301029996	0.935768862	3.037795021	0.99888327	0.904710897	0.102951731	0.82931571	0.171417845	-1.604446711	0.701029911	0.31994007	0.162715304	2299.067424	236.6929706
818	1103.788858	1000	1046.25	467.2563768	14	0.559708173	129.593602	MAGPHPVIVITMPHEE	Kd	34519.93551	437.6305223	78.87917718	6.21E-09	HPVIVITMPHEE	9	full	39206.50904	calibration_redo.csv	2.90E-05	3.67E-07	1	34.51993551	0.437630522	3.019635471	0	0.935768862	3.037795021	0.99888327	0.904710897	0.102951731	0.82931571	0.171417845	-1.604446711	0.701029911	0.31994007	0.162715304	2299.067424	236.6929706
819	2147.12915	2000	2170	333.7564263	13	0.182143216	96.34718127	MAGPHPVIVITMPHEE	Kd	34519.93551	437.6305223	78.87917718	6.21E-09	HPVIVITMPHEE	9	full	39206.50904	calibration_redo.csv	2.90E-05	3.67E-07	2	34.51993551	0.437630522	3.336459734	0.301029996	0.935768862	3.037795021	0.99888327	0.904710897	0.102951731	0.82931571	0.171417845	-1.604446711	0.701029911	0.31994007	0.162715304	2299.067424	236.6929706
820	287.6046007	63	586.5	153.2306	21	0.402758946	34.26340379	MAGPHPKIVITGPHEE	Kd	8525.214735	1457.371822	5.84971838	0.00206744	HPKIVITGPHEE	10	full	39206.50904	calibration_redo.csv	0.000117299	2.01E-05	0.063	8.525214735	1.457371822	2.768268016	-1.200659451	0.74383299	3.671056732	0.93715375	0.075395186	0.199152435	0	0.241757546	-2.433762422	0.721460719	-0.50937564	0.235666934	567.7891105	113.0765841
821	566.5539851	125	830	2737.959962	19	2.128049714	645.3433519	MAGPHPKIVITGPHEE	Kd	8525.214735	1457.371822	5.84971838	0.00206744	HPKIVITGPHEE	10	full	39206.50904	calibration_redo.csv	0.000117299	2.01E-05	0.125	8.525214735	1.457371822	2.919078092	-0.903089987	0.74383299	3.671056732	0.93715375	0.075395186	0.199152435	0	0.241757546	-2.433762422	0.721460719	-0.50937564	0.235666934	567.7891105	113.0765841
822	1116.967226	250	1721.5	809.9291496	12	0.503517668	244.2028269	MAGPHPKIVITGPHEE	Kd	8525.214735	1457.371822	5.84971838	0.00206744	HPKIVITGPHEE	10	full	39206.50904	calibration_redo.csv	0.000117299	2.01E-05	0.25	8.525214735	1.457371822	3.235907027	-0.602059991	0.74383299	3.671056732	0.93715375	0.075395186	0.199152435	0	0.241757546	-2.433762422	0.721460719	-0.50937564	0.235666934	567.7891105	113.0765841
823	2172.054083	500	3715.5	2745.718432	43	0.773403813	423.6735521	MAGPHPKIVITGPHEE	Kd	8525.214735	1457.371822	5.84971838	0.00206744	HPKIVITGPHEE	10	full	39206.50904	calibration_redo.csv	0.000117299	2.01E-05	0.5	8.525214735	1.457371822	3.570017266	-0.301029996	0.74383299	3.671056732	0.93715375	0.075395186	0.199152435	0	0.241757546	-2.433762422	0.721460719	-0.50937564	0.235666934	567.7891105	113.0765841
824	4116.076134	1000	5709	1778.944726	18	0.305593513	431.4574711	MAGPHPKIVITGPHEE	Kd	8525.214735	1457.371822	5.84971838	0.00206744	HPKIVITGPHEE	10	full	39206.50904	calibration_redo.csv	0.000117299	2.01E-05	1	8.525214735	1.457371822	3.756560043	0	0.74383299	3.671056732	0.93715375	0.075395186	0.199152435	0	0.241757546	-2.433762422	0.721460719	-0.50937564	0.235666934	567.7891105	113.0765841
825	7450.01599	2000	5805.5	3253.327451	10	0.487656539	1084.442484	MAGPHPKIVITGPHEE	Kd	8525.214735	1457.371822	5.84971838	0.00206744	HPKIVITGPHEE	10	full	39206.50904	calibration_redo.csv	0.000117299	2.01E-05	2	8.525214735	1.457371822	3.763839629	0.301029996	0.74383299	3.671056732	0.93715375	0.075395186	0.199152435	0	0.241757546	-2.433762422	0.721460719	-0.50937564	0.235666934	567.7891105	113.0765841
826	295.2260694	63	693.5	343.4483073	14	0.696347039	95.25542173	MAGPHPKIIITGPHEE	Kd	8303.503928	2687.735525	3.089405133	0.027177787	HPKIIITGPHEE	11	full	39206.50904	calibration_redo.csv	0.000120431	3.90E-05	0.063	8.303503928	2.687735525	2.841046465	-1.200659451	0.612283605	3.711617284	0.757842852	0.059769265	0.339428273	-0.015625921	0.366055421	-2.449388343	0.772046261	-0.525001561	0.362061823	553.0229157	187.7116131
827	581.4571211	125	1339.5	798.7667056	6	0.558773491	357.2193304	MAGPHPKIIITGPHEE	Kd	8303.503928	2687.735525	3.089405133	0.027177787	HPKIIITGPHEE	11	full	39206.50904	calibration_redo.csv	0.000120431	3.90E-05	0.125	8.303503928	2.687735525	3.126942718	-0.903089987	0.612283605	3.711617284	0.757842852	0.059769265	0.339428273	-0.015625921	0.366055421	-2.449388343	0.772046261	-0.525001561	0.362061823	553.0229157	187.7116131
828	1145.919537	250	2931.25	2066.022898	20	0.629424475	473.9781593	MAGPHPKIIITGPHEE	Kd	8303.503928	2687.735525	3.089405133	0.027177787	HPKIIITGPHEE	11	full	39206.50904	calibration_redo.csv	0.000120431	3.90E-05	0.25	8.303503928	2.687735525	3.46705286	-0.602059991	0.612283605	3.711617284	0.757842852	0.059769265	0.339428273	-0.015625921	0.366055421	-2.449388343	0.772046261	-0.525001561	0.362061823	553.0229157	187.7116131
829	2226.755923	500	4593.75	1682.441036	18	0.358659332	408.0518883	MAGPHPKIIITGPHEE	Kd	8303.503928	2687.735525	3.089405133	0.027177787	HPKIIITGPHEE	11	full	39206.50904	calibration_redo.csv	0.000120431	3.90E-05	0.5	8.303503928	2.687735525	3.662167356	-0.301029996	0.612283605	3.711617284	0.757842852	0.059769265	0.339428273	-0.015625921	0.366055421	-2.449388343	0.772046261	-0.525001561	0.362061823	553.0229157	187.7116131
830	4214.165903	1000	7450.25	3149.655032	28	0.415266437	606.1513936	MAGPHPKIIITGPHEE	Kd	8303.503928	2687.735525	3.089405133	0.027177787	HPKIIITGPHEE	11	full	39206.50904	calibration_redo.csv	0.000120431	3.90E-05	1	8.303503928	2.687735525	3.872170846	0	0.612283605	3.711617284	0.757842852	0.059769265	0.339428273	-0.015625921	0.366055421	-2.449388343	0.772046261	-0.525001561	0.362061823	553.0229157	187.7116131
831	7610.325441	2000	4401.5	1957.254167	8	0.395165388	739.7725398	MAGPHPKIIITGPHEE	Kd	8303.503928	2687.735525	3.089405133	0.027177787	HPKIIITGPHEE	11	full	39206.50904	calibration_redo.csv	0.000120431	3.90E-05	2	8.303503928	2.687735525	3.643600706	0.301029996	0.612283605	3.711617284	0.757842852	0.059769265	0.339428273	-0.015625921	0.366055421	-2.449388343	0.772046261	-0.525001561	0.362061823	553.0229157	187.7116131
832	28.63419374	63	205.75	43.15555982	8	-3.211576545	16.31126843	MAGPHPKIVLTGPHEE	Kd	86197.85622	16380.12475	5.262344308	0.003292496	HPKIVLTGPHEE	12	full	39206.50904	calibration_redo.csv	1.16E-05	2.20E-06	0.063	86.19785622	16.38012475	2.313339844	-1.200659451	0.366335761	2.740089585	0.957512359	1.447370124	0.215753332	1.371974938	0.255606179	-1.061787484	0.726218547	0.862599298	0.24985338	5740.876404	1238.613213
833	56.77307082	125	245	58.85622784	6	3.880630407	26.32130527	MAGPHPKIVLTGPHEE	Kd	86197.85622	16380.12475	5.262344308	0.003292496	HPKIVLTGPHEE	12	full	39206.50904	calibration_redo.csv	1.16E-05	2.20E-06	0.125	86.19785622	16.38012475	2.389166084	-0.903089987	0.366335761	2.740089585	0.957512359	1.447370124	0.215753332	1.371974938	0.255606179	-1.061787484	0.726218547	0.862599298	0.24985338	5740.876404	1238.613213
834	113.3819587	250	336.5	2286.052423	15	3.181553753	610.9732097	MAGPHPKIVLTGPHEE	Kd	86197.85622	16380.12475	5.262344308	0.003292496	HPKIVLTGPHEE	12	full	39206.50904	calibration_redo.csv	1.16E-05	2.20E-06	0.25	86.19785622	16.38012475	2.526985069	-0.602059991	0.366335761	2.740089585	0.957512359	1.447370124	0.215753332	1.371974938	0.255606179	-1.061787484	0.726218547	0.862599298	0.24985338	5740.876404	1238.613213
835	226.1100259	500	457	186.0523268	24	0.627186719	38.79459191	MAGPHPKIVLTGPHEE	Kd	86197.85622	16380.12475	5.262344308	0.003292496	HPKIVLTGPHEE	12	full	39206.50904	calibration_redo.csv	1.16E-05	2.20E-06	0.5	86.19785622	16.38012475	2.6599162	-0.301029996	0.366335761	2.740089585	0.957512359	1.447370124	0.215753332	1.371974938	0.255606179	-1.061787484	0.726218547	0.862599298	0.24985338	5740.876404	1238.613213
836	449.6269832	1000	470.5	6160.418643	10	2.707102868	2053.472881	MAGPHPKIVLTGPHEE	Kd	86197.85622	16380.12475	5.262344308	0.003292496	HPKIVLTGPHEE	12	full	39206.50904	calibration_redo.csv	1.16E-05	2.20E-06	1	86.19785622	16.38012475	2.672559628	0	0.366335761	2.740089585	0.957512359	1.447370124	0.215753332	1.371974938	0.255606179	-1.061787484	0.726218547	0.862599298	0.24985338	5740.876404	1238.613213
837	889.0580955	2000	771.5	178.9636835	5	0.392034356	89.48184173	MAGPHPKIVLTGPHEE	Kd	86197.85622	16380.12475	5.262344308	0.003292496	HPKIVLTGPHEE	12	full	39206.50904	calibration_redo.csv	1.16E-05	2.20E-06	2	86.19785622	16.38012475	2.88733593	0.301029996	0.366335761	2.740089585	0.957512359	1.447370124	0.215753332	1.371974938	0.255606179	-1.061787484	0.726218547	0.862599298	0.24985338	5740.876404	1238.613213
838	7.335549455	63	158	21.43566314	9	-0.282461154	7.578651383	MAGPHPKIVIQGPHEE	Kd	336654.7993	155336.0169	2.167268133	0.082426841	HPKIVIQGPHEE	13	full	39206.50904	calibration_redo.csv	2.97E-06	1.37E-06	0.063	336.6547993	155.3360169	2.198657087	-1.200659451	-0.069422393	2.103140253	-0.200334689	2.255280893	0.472586363	2.179885707	0.492059843	-0.253876715	0.839155377	1.670510067	0.489096188	22421.59699	10596.14097
839	14.55198215	125	150.5	60.30109636	3	-0.776408966	42.63931415	MAGPHPKIVIQGPHEE	Kd	336654.7993	155336.0169	2.167268133	0.082426841	HPKIVIQGPHEE	13	full	39206.50904	calibration_redo.csv	2.97E-06	1.37E-06	0.125	336.6547993	155.3360169	2.1775365	-0.903089987	-0.069422393	2.103140253	-0.200334689	2.255280893	0.472586363	2.179885707	0.492059843	-0.253876715	0.839155377	1.670510067	0.489096188	22421.59699	10596.14097
840	29.09316602	250	204.25	29.78942765	10	-0.731926969	9.929809218	MAGPHPKIVIQGPHEE	Kd	336654.7993	155336.0169	2.167268133	0.082426841	HPKIVIQGPHEE	13	full	39206.50904	calibration_redo.csv	2.97E-06	1.37E-06	0.25	336.6547993	155.3360169	2.310162065	-0.602059991	-0.069422393	2.103140253	-0.200334689	2.255280893	0.472586363	2.179885707	0.492059843	-0.253876715	0.839155377	1.670510067	0.489096188	22421.59699	10596.14097
841	58.14318692	500	89.75	44.78403733	10	-0.324993014	14.92801244	MAGPHPKIVIQGPHEE	Kd	336654.7993	155336.0169	2.167268133	0.082426841	HPKIVIQGPHEE	13	full	39206.50904	calibration_redo.csv	2.97E-06	1.37E-06	0.5	336.6547993	155.3360169	1.953034457	-0.301029996	-0.069422393	2.103140253	-0.200334689	2.255280893	0.472586363	2.179885707	0.492059843	-0.253876715	0.839155377	1.670510067	0.489096188	22421.59699	10596.14097
842	116.1141767	1000	69.5	118.3808355	15	-0.734524316	31.63860912	MAGPHPKIVIQGPHEE	Kd	336654.7993	155336.0169	2.167268133	0.082426841	HPKIVIQGPHEE	13	full	39206.50904	calibration_redo.csv	2.97E-06	1.37E-06	1	336.6547993	155.3360169	1.841984805	0	-0.069422393	2.103140253	-0.200334689	2.255280893	0.472586363	2.179885707	0.492059843	-0.253876715	0.839155377	1.670510067	0.489096188	22421.59699	10596.14097
843	231.5426157	2000	211.5	77.53960278	10	-3.177852573	25.84653426	MAGPHPKIVIQGPHEE	Kd	336654.7993	155336.0169	2.167268133	0.082426841	HPKIVIQGPHEE	13	full	39206.50904	calibration_redo.csv	2.97E-06	1.37E-06	2	336.6547993	155.3360169	2.325310372	0.301029996	-0.069422393	2.103140253	-0.200334689	2.255280893	0.472586363	2.179885707	0.492059843	-0.253876715	0.839155377	1.670510067	0.489096188	22421.59699	10596.14097
844	4195.092595	63	5762.5	1963.89553	21	0.375133539	439.1403907	MAGPIPKIVITGPHEE	Kd	525.7855901	58.00903601	9.063856707	0.00027334	IPKIVITGPHEE	14	full	39206.50904	calibration_redo.csv	0.001901916	0.000209835	0.063	0.52578559	0.058009036	3.760610938	-1.200659451	0.485219302	4.378587034	0.966427476	-1.576637574	0.150368458	-1.652032761	0.203459312	-4.085795182	0.709545312	-2.161408401	0.196183293	35.01792527	5.265591416
845	7530.611778	125	9191.25	2218.436547	28	0.26027023	426.9383126	MAGPIPKIVITGPHEE	Kd	525.7855901	58.00903601	9.063856707	0.00027334	IPKIVITGPHEE	14	full	39206.50904	calibration_redo.csv	0.001901916	0.000209835	0.125	0.52578559	0.058009036	3.963374579	-0.903089987	0.485219302	4.378587034	0.966427476	-1.576637574	0.150368458	-1.652032761	0.203459312	-4.085795182	0.709545312	-2.161408401	0.196183293	35.01792527	5.265591416
846	12634.45388	250	12713.25	3910.946224	26	0.308084276	782.1892448	MAGPIPKIVITGPHEE	Kd	525.7855901	58.00903601	9.063856707	0.00027334	IPKIVITGPHEE	14	full	39206.50904	calibration_redo.csv	0.001901916	0.000209835	0.25	0.52578559	0.058009036	4.104256587	-0.602059991	0.485219302	4.378587034	0.966427476	-1.576637574	0.150368458	-1.652032761	0.203459312	-4.085795182	0.709545312	-2.161408401	0.196183293	35.01792527	5.265591416
847	19110.47953	500	16356.5	9594.387925	17	0.504949026	2398.596981	MAGPIPKIVITGPHEE	Kd	525.7855901	58.00903601	9.063856707	0.00027334	IPKIVITGPHEE	14	full	39206.50904	calibration_redo.csv	0.001901916	0.000209835	0.5	0.52578559	0.058009036	4.213690378	-0.301029996	0.485219302	4.378587034	0.966427476	-1.576637574	0.150368458	-1.652032761	0.203459312	-4.085795182	0.709545312	-2.161408401	0.196183293	35.01792527	5.265591416
848	25695.94922	1000	28020	5505.677153	26	0.190277926	1101.135431	MAGPIPKIVITGPHEE	Kd	525.7855901	58.00903601	9.063856707	0.00027334	IPKIVITGPHEE	14	full	39206.50904	calibration_redo.csv	0.001901916	0.000209835	1	0.52578559	0.058009036	4.447468131	0	0.485219302	4.378587034	0.966427476	-1.576637574	0.150368458	-1.652032761	0.203459312	-4.085795182	0.709545312	-2.161408401	0.196183293	35.01792527	5.265591416
849	31045.00175	2000	29458.5	7004.47621	7	0.277973527	2859.565438	MAGPIPKIVITGPHEE	Kd	525.7855901	58.00903601	9.063856707	0.00027334	IPKIVITGPHEE	14	full	39206.50904	calibration_redo.csv	0.001901916	0.000209835	2	0.52578559	0.058009036	4.469210629	0.301029996	0.485219302	4.378587034	0.966427476	-1.576637574	0.150368458	-1.652032761	0.203459312	-4.085795182	0.709545312	-2.161408401	0.196183293	35.01792527	5.265591416
850	651.9439534	63	1211	608.8338708	15	0.698631278	162.7176964	MAGPTPKIVITGPHEE	Kd	3725.684681	555.7577875	6.703792129	0.001117793	TPKIVITGPHEE	15	full	39206.50904	calibration_redo.csv	0.000268407	4.00E-05	0.063	3.725684681	0.555757788	3.083144143	-1.200659451	0.758710654	3.878156575	0.675618262	-0.415476912	0.180803257	-0.490872099	0.226880666	-2.92463452	0.716612654	-1.000247739	0.220379285	248.1348866	44.86359577
851	1272.712267	125	1913.25	739.7001741	22	0.491191012	161.4158114	MAGPTPKIVITGPHEE	Kd	3725.684681	555.7577875	6.703792129	0.001117793	TPKIVITGPHEE	15	full	39206.50904	calibration_redo.csv	0.000268407	4.00E-05	0.125	3.725684681	0.555757788	3.281771722	-0.903089987	0.758710654	3.878156575	0.675618262	-0.415476912	0.180803257	-0.490872099	0.226880666	-2.92463452	0.716612654	-1.000247739	0.220379285	248.1348866	44.86359577
852	2465.393522	250	855.75	1872.536139	10	1.162416127	624.1787128	MAGPTPKIVITGPHEE	Kd	3725.684681	555.7577875	6.703792129	0.001117793	TPKIVITGPHEE	15	full	39206.50904	calibration_redo.csv	0.000268407	4.00E-05	0.25	3.725684681	0.555757788	2.932346908	-0.602059991	0.758710654	3.878156575	0.675618262	-0.415476912	0.180803257	-0.490872099	0.226880666	-2.92463452	0.716612654	-1.000247739	0.220379285	248.1348866	44.86359577
853	4639.071771	500	7259.5	2990.467766	16	0.496562118	772.135457	MAGPTPKIVITGPHEE	Kd	3725.684681	555.7577875	6.703792129	0.001117793	TPKIVITGPHEE	15	full	39206.50904	calibration_redo.csv	0.000268407	4.00E-05	0.5	3.725684681	0.555757788	3.86090671	-0.301029996	0.758710654	3.878156575	0.675618262	-0.415476912	0.180803257	-0.490872099	0.226880666	-2.92463452	0.716612654	-1.000247739	0.220379285	248.1348866	44.86359577
854	8296.471661	1000	9758	4216.708098	26	0.460095896	843.3416197	MAGPTPKIVITGPHEE	Kd	3725.684681	555.7577875	6.703792129	0.001117793	TPKIVITGPHEE	15	full	39206.50904	calibration_redo.csv	0.000268407	4.00E-05	1	3.725684681	0.555757788	3.989360814	0	0.758710654	3.878156575	0.675618262	-0.415476912	0.180803257	-0.490872099	0.226880666	-2.92463452	0.716612654	-1.000247739	0.220379285	248.1348866	44.86359577
855	13694.95919	2000	11708	3059.708721	19	0.265168429	721.1802617	MAGPTPKIVITGPHEE	Kd	3725.684681	555.7577875	6.703792129	0.001117793	TPKIVITGPHEE	15	full	39206.50904	calibration_redo.csv	0.000268407	4.00E-05	2	3.725684681	0.555757788	4.068482714	0.301029996	0.758710654	3.878156575	0.675618262	-0.415476912	0.180803257	-0.490872099	0.226880666	-2.92463452	0.716612654	-1.000247739	0.220379285	248.1348866	44.86359577
856	114.8335434	63	306.75	70.71367332	40	0.866721904	11.32324996	MAGPHPKIVITTPHEE	Kd	21446.4823	1704.115129	12.58511349	5.62E-05	HPKIVITTPHEE	16	full	39206.50904	calibration_redo.csv	4.66E-05	3.70E-06	0.063	21.4464823	1.704115129	2.486784571	-1.200659451	0.672711294	3.26316354	0.954252121	0.622456914	0.12942976	0.547061728	0.188512815	-1.886700694	0.705404806	0.037686088	0.18063575	1428.360398	184.8723439
857	227.18947	125	467	161.9340155	31	0.692646358	29.56497105	MAGPHPKIVITTPHEE	Kd	21446.4823	1704.115129	12.58511349	5.62E-05	HPKIVITTPHEE	16	full	39206.50904	calibration_redo.csv	4.66E-05	3.70E-06	0.125	21.4464823	1.704115129	2.669316881	-0.903089987	0.672711294	3.26316354	0.954252121	0.622456914	0.12942976	0.547061728	0.188512815	-1.886700694	0.705404806	0.037686088	0.18063575	1428.360398	184.8723439
858	451.7611254	250	572.5	190.3613874	34	0.516687596	33.13766411	MAGPHPKIVITTPHEE	Kd	21446.4823	1704.115129	12.58511349	5.62E-05	HPKIVITTPHEE	16	full	39206.50904	calibration_redo.csv	4.66E-05	3.70E-06	0.25	21.4464823	1.704115129	2.757775491	-0.602059991	0.672711294	3.26316354	0.954252121	0.622456914	0.12942976	0.547061728	0.188512815	-1.886700694	0.705404806	0.037686088	0.18063575	1428.360398	184.8723439
859	893.2299151	500	1397.5	250.735373	11	0.223770971	79.28948686	MAGPHPKIVITTPHEE	Kd	21446.4823	1704.115129	12.58511349	5.62E-05	HPKIVITTPHEE	16	full	39206.50904	calibration_redo.csv	4.66E-05	3.70E-06	0.5	21.4464823	1.704115129	3.145351817	-0.301029996	0.672711294	3.26316354	0.954252121	0.622456914	0.12942976	0.547061728	0.188512815	-1.886700694	0.705404806	0.037686088	0.18063575	1428.360398	184.8723439
860	1746.666071	1000	1527.5	430.0240364	4	0.31581679	248.2744932	MAGPHPKIVITTPHEE	Kd	21446.4823	1704.115129	12.58511349	5.62E-05	HPKIVITTPHEE	16	full	39206.50904	calibration_redo.csv	4.66E-05	3.70E-06	1	21.4464823	1.704115129	3.183981219	0	0.672711294	3.26316354	0.954252121	0.622456914	0.12942976	0.547061728	0.188512815	-1.886700694	0.705404806	0.037686088	0.18063575	1428.360398	184.8723439
861	3344.340404	2000	3277.5	630.0305047	20	0.196361414	144.5389106	MAGPHPKIVITTPHEE	Kd	21446.4823	1704.115129	12.58511349	5.62E-05	HPKIVITTPHEE	16	full	39206.50904	calibration_redo.csv	4.66E-05	3.70E-06	2	21.4464823	1.704115129	3.5155427	0.301029996	0.672711294	3.26316354	0.954252121	0.622456914	0.12942976	0.547061728	0.188512815	-1.886700694	0.705404806	0.037686088	0.18063575	1428.360398	184.8723439
862	32.02833138	63	235.5	53.08367012	11	3.25303828	16.78653041	MAGPHPKIVITNPHEE	Kd	77056.53646	13103.58381	5.880569588	0.002019569	HPKIVITNPHEE	17	full	39206.50904	calibration_redo.csv	1.30E-05	2.21E-06	0.063	77.05653646	13.10358381	2.371990911	-1.200659451	0.416901514	2.780461966	0.912365783	1.380891316	0.198383135	1.30549613	0.241124214	-1.128266292	0.72124874	0.79612049	0.235017189	5132.05399	1018.112958
863	63.49722815	125	210.5	90.03582683	21	-2.248219219	20.13262292	MAGPHPKIVITNPHEE	Kd	77056.53646	13103.58381	5.880569588	0.002019569	HPKIVITNPHEE	17	full	39206.50904	calibration_redo.csv	1.30E-05	2.21E-06	0.125	77.05653646	13.10358381	2.3232521	-0.903089987	0.416901514	2.780461966	0.912365783	1.380891316	0.198383135	1.30549613	0.241124214	-1.128266292	0.72124874	0.79612049	0.235017189	5132.05399	1018.112958
864	126.7891139	250	289.5	123.9505427	17	1.118746602	30.98763566	MAGPHPKIVITNPHEE	Kd	77056.53646	13103.58381	5.880569588	0.002019569	HPKIVITNPHEE	17	full	39206.50904	calibration_redo.csv	1.30E-05	2.21E-06	0.25	77.05653646	13.10358381	2.461648568	-0.602059991	0.416901514	2.780461966	0.912365783	1.380891316	0.198383135	1.30549613	0.241124214	-1.128266292	0.72124874	0.79612049	0.235017189	5132.05399	1018.112958
865	252.7608299	500	476.75	112.910061	20	0.454503617	25.90334451	MAGPHPKIVITNPHEE	Kd	77056.53646	13103.58381	5.880569588	0.002019569	HPKIVITNPHEE	17	full	39206.50904	calibration_redo.csv	1.30E-05	2.21E-06	0.5	77.05653646	13.10358381	2.678290702	-0.301029996	0.416901514	2.780461966	0.912365783	1.380891316	0.198383135	1.30549613	0.241124214	-1.128266292	0.72124874	0.79612049	0.235017189	5132.05399	1018.112958
866	502.2834835	1000	632	135.2253761	8	0.322300911	51.11038802	MAGPHPKIVITNPHEE	Kd	77056.53646	13103.58381	5.880569588	0.002019569	HPKIVITNPHEE	17	full	39206.50904	calibration_redo.csv	1.30E-05	2.21E-06	1	77.05653646	13.10358381	2.800717078	0	0.416901514	2.780461966	0.912365783	1.380891316	0.198383135	1.30549613	0.241124214	-1.128266292	0.72124874	0.79612049	0.235017189	5132.05399	1018.112958
867	991.8600231	2000	829.5	510.6115223	15	0.87764098	136.4666696	MAGPHPKIVITNPHEE	Kd	77056.53646	13103.58381	5.880569588	0.002019569	HPKIVITNPHEE	17	full	39206.50904	calibration_redo.csv	1.30E-05	2.21E-06	2	77.05653646	13.10358381	2.91881639	0.301029996	0.416901514	2.780461966	0.912365783	1.380891316	0.198383135	1.30549613	0.241124214	-1.128266292	0.72124874	0.79612049	0.235017189	5132.05399	1018.112958
868	14631.82148	63	14511.75	3848.504863	30	0.27075675	714.649412	MAGPHPVIVITGPZEE	Kd	105.8108397	26.56939576	3.982433044	0.010505253	HPVIVITGPZEE	22	full	39206.50904	calibration_redo.csv	0.009450828	0.002373129	0.063	0.10581084	0.026569396	4.161719788	-1.200659451	0.278201014	4.55175332	0.749687889	-2.527359213	0.271092128	-2.602754399	0.303769585	-5.036516821	0.744536647	-3.112130039	0.298945067	7.047123671	1.910419752
869	21233.03064	125	21682	5040.738601	18	0.246607456	1222.558687	MAGPHPVIVITGPZEE	Kd	105.8108397	26.56939576	3.982433044	0.010505253	HPVIVITGPZEE	22	full	39206.50904	calibration_redo.csv	0.009450828	0.002373129	0.125	0.10581084	0.026569396	4.33609934	-0.903089987	0.278201014	4.55175332	0.749687889	-2.527359213	0.271092128	-2.602754399	0.303769585	-5.036516821	0.744536647	-3.112130039	0.298945067	7.047123671	1.910419752
870	27547.29808	250	21712	2365.951429	3	0.107842264	1672.9803	MAGPHPVIVITGPZEE	Kd	105.8108397	26.56939576	3.982433044	0.010505253	HPVIVITGPZEE	22	full	39206.50904	calibration_redo.csv	0.009450828	0.002373129	0.25	0.10581084	0.026569396	4.33669983	-0.602059991	0.278201014	4.55175332	0.749687889	-2.527359213	0.271092128	-2.602754399	0.303769585	-5.036516821	0.744536647	-3.112130039	0.298945067	7.047123671	1.910419752
871	32358.70545	500	39587.5	12797.39089	38	0.319473427	2103.878103	MAGPHPVIVITGPZEE	Kd	105.8108397	26.56939576	3.982433044	0.010505253	HPVIVITGPZEE	22	full	39206.50904	calibration_redo.csv	0.009450828	0.002373129	0.5	0.10581084	0.026569396	4.597558076	-0.301029996	0.278201014	4.55175332	0.749687889	-2.527359213	0.271092128	-2.602754399	0.303769585	-5.036516821	0.744536647	-3.112130039	0.298945067	7.047123671	1.910419752
872	35454.98708	1000	37358	7350.222824	26	0.209855432	1470.044565	MAGPHPVIVITGPZEE	Kd	105.8108397	26.56939576	3.982433044	0.010505253	HPVIVITGPZEE	22	full	39206.50904	calibration_redo.csv	0.009450828	0.002373129	1	0.10581084	0.026569396	4.572383618	0	0.278201014	4.55175332	0.749687889	-2.527359213	0.271092128	-2.602754399	0.303769585	-5.036516821	0.744536647	-3.112130039	0.298945067	7.047123671	1.910419752
873	37236.49655	2000	35752	6409.489176	14	0.193821263	1777.672452	MAGPHPVIVITGPZEE	Kd	105.8108397	26.56939576	3.982433044	0.010505253	HPVIVITGPZEE	22	full	39206.50904	calibration_redo.csv	0.009450828	0.002373129	2	0.10581084	0.026569396	4.553300342	0.301029996	0.278201014	4.55175332	0.749687889	-2.527359213	0.271092128	-2.602754399	0.303769585	-5.036516821	0.744536647	-3.112130039	0.298945067	7.047123671	1.910419752
874	122.3447709	63	466	142.6098018	12	0.619145304	42.99847308	KRMEPIAIIITDTEIS	Kd	20125.93043	3264.842067	6.164442266	0.00351546	KRMEPIAIIITDTEIS	28	full	39206.50904	calibration_redo.csv	4.97E-05	8.06E-06	0.063	20.12593043	3.264842067	2.668385917	-1.200659451	0.446975707	3.188875063	0.964006261	0.584770826	0.191713028	0.50937564	0.235666934	-1.924386782	0.719442675	0	0.229414682	1340.410124	256.9740835
875	242.0043684	125	629.5	42.9075233	3	0.109925337	30.34020069	KRMEPIAIIITDTEIS	Kd	20125.93043	3264.842067	6.164442266	0.00351546	KRMEPIAIIITDTEIS	28	full	39206.50904	calibration_redo.csv	4.97E-05	8.06E-06	0.125	20.12593043	3.264842067	2.798995734	-0.903089987	0.446975707	3.188875063	0.964006261	0.584770826	0.191713028	0.50937564	0.235666934	-1.924386782	0.719442675	0	0.229414682	1340.410124	256.9740835
876	481.0394937	250	719	175.8245851	6	0.340360545	78.63114488	KRMEPIAIIITDTEIS	Kd	20125.93043	3264.842067	6.164442266	0.00351546	KRMEPIAIIITDTEIS	28	full	39206.50904	calibration_redo.csv	4.97E-05	8.06E-06	0.25	20.12593043	3.264842067	2.85672889	-0.602059991	0.446975707	3.188875063	0.964006261	0.584770826	0.191713028	0.50937564	0.235666934	-1.924386782	0.719442675	0	0.229414682	1340.410124	256.9740835
877	950.4179499	500	1187.25	175.3849338	4	0.192624859	101.2585387	KRMEPIAIIITDTEIS	Kd	20125.93043	3264.842067	6.164442266	0.00351546	KRMEPIAIIITDTEIS	28	full	39206.50904	calibration_redo.csv	4.97E-05	8.06E-06	0.5	20.12593043	3.264842067	3.074542178	-0.301029996	0.446975707	3.188875063	0.964006261	0.584770826	0.191713028	0.50937564	0.235666934	-1.924386782	0.719442675	0	0.229414682	1340.410124	256.9740835
878	1855.847683	1000	1591.25	661.9259475	10	0.536754742	220.6419825	KRMEPIAIIITDTEIS	Kd	20125.93043	3264.842067	6.164442266	0.00351546	KRMEPIAIIITDTEIS	28	full	39206.50904	calibration_redo.csv	4.97E-05	8.06E-06	1	20.12593043	3.264842067	3.201738417	0	0.446975707	3.188875063	0.964006261	0.584770826	0.191713028	0.50937564	0.235666934	-1.924386782	0.719442675	0	0.229414682	1340.410124	256.9740835
879	52.48184195	63	239.5	50.0346562	18	2.725034226	12.13518661	KRMEPIPIIITDTEIS	Kd	47001.08879	14510.43617	3.239123086	0.031700273	KRMEPIPIIITDTEIS	29	full	39206.50904	calibration_redo.csv	2.13E-05	6.57E-06	0.063	47.00108879	14.51043617	2.379305518	-1.200659451	0.368782935	2.853207043	0.665355494	1.087730722	0.32519193	1.012335535	0.352894899	-1.421426886	0.765894032	0.502959895	0.348750631	3130.326593	1017.956947
880	103.9936425	125	278.5	1764.277287	7	1.88736013	720.2631865	KRMEPIPIIITDTEIS	Kd	47001.08879	14510.43617	3.239123086	0.031700273	KRMEPIPIIITDTEIS	29	full	39206.50904	calibration_redo.csv	2.13E-05	6.57E-06	0.125	47.00108879	14.51043617	2.4448252	-0.903089987	0.368782935	2.853207043	0.665355494	1.087730722	0.32519193	1.012335535	0.352894899	-1.421426886	0.765894032	0.502959895	0.348750631	3130.326593	1017.956947
881	207.4370667	250	596.5	219.9189837	8	0.57251932	83.12156276	KRMEPIPIIITDTEIS	Kd	47001.08879	14510.43617	3.239123086	0.031700273	KRMEPIPIIITDTEIS	29	full	39206.50904	calibration_redo.csv	2.13E-05	6.57E-06	0.25	47.00108879	14.51043617	2.775610448	-0.602059991	0.368782935	2.853207043	0.665355494	1.087730722	0.32519193	1.012335535	0.352894899	-1.421426886	0.765894032	0.502959895	0.348750631	3130.326593	1017.956947
882	412.6906355	500	636	2013.677578	3	1.157396826	1423.885071	KRMEPIPIIITDTEIS	Kd	47001.08879	14510.43617	3.239123086	0.031700273	KRMEPIPIIITDTEIS	29	full	39206.50904	calibration_redo.csv	2.13E-05	6.57E-06	0.5	47.00108879	14.51043617	2.803457116	-0.301029996	0.368782935	2.853207043	0.665355494	1.087730722	0.32519193	1.012335535	0.352894899	-1.421426886	0.765894032	0.502959895	0.348750631	3130.326593	1017.956947
883	816.7837444	1000	567.5	203.6946244	3	0.475366685	144.0338502	KRMEPIPIIITDTEIS	Kd	47001.08879	14510.43617	3.239123086	0.031700273	KRMEPIPIIITDTEIS	29	full	39206.50904	calibration_redo.csv	2.13E-05	6.57E-06	1	47.00108879	14.51043617	2.753965866	0	0.368782935	2.853207043	0.665355494	1.087730722	0.32519193	1.012335535	0.352894899	-1.421426886	0.765894032	0.502959895	0.348750631	3130.326593	1017.956947
884	255.5023571	63	931.5	393.5206216	7	0.626482682	160.654121	KRMEPPAIIITDTEIS	Kd	9604.269207	1809.558685	5.307520164	0.003172429	KRMEPPAIIITDTEIS	30	full	39206.50904	calibration_redo.csv	0.00010412	1.96E-05	0.063	9.604269207	1.809558685	2.969182859	-1.200659451	0.509482835	3.636567669	0.944016095	0.146068628	0.214330082	0.070673442	0.25440598	-2.36308898	0.725796983	-0.438702198	0.248625411	639.6553799	137.0973899
885	503.7185759	125	1700	539.4825507	10	0.433162753	179.8275169	KRMEPPAIIITDTEIS	Kd	9604.269207	1809.558685	5.307520164	0.003172429	KRMEPPAIIITDTEIS	30	full	39206.50904	calibration_redo.csv	0.00010412	1.96E-05	0.125	9.604269207	1.809558685	3.230448921	-0.903089987	0.509482835	3.636567669	0.944016095	0.146068628	0.214330082	0.070673442	0.25440598	-2.36308898	0.725796983	-0.438702198	0.248625411	639.6553799	137.0973899
886	994.6579551	250	1935.5	817.4566411	5	0.532094409	408.7283205	KRMEPPAIIITDTEIS	Kd	9604.269207	1809.558685	5.307520164	0.003172429	KRMEPPAIIITDTEIS	30	full	39206.50904	calibration_redo.csv	0.00010412	1.96E-05	0.25	9.604269207	1.809558685	3.286793176	-0.602059991	0.509482835	3.636567669	0.944016095	0.146068628	0.214330082	0.070673442	0.25440598	-2.36308898	0.725796983	-0.438702198	0.248625411	639.6553799	137.0973899
887	1940.096222	500	3743.5	1047.2685	14	0.289243618	290.4600212	KRMEPPAIIITDTEIS	Kd	9604.269207	1809.558685	5.307520164	0.003172429	KRMEPPAIIITDTEIS	30	full	39206.50904	calibration_redo.csv	0.00010412	1.96E-05	0.5	9.604269207	1.809558685	3.573277837	-0.301029996	0.509482835	3.636567669	0.944016095	0.146068628	0.214330082	0.070673442	0.25440598	-2.36308898	0.725796983	-0.438702198	0.248625411	639.6553799	137.0973899
888	3697.238185	1000	4438.75	2472.75	2	0.588434767	2472.75	KRMEPPAIIITDTEIS	Kd	9604.269207	1809.558685	5.307520164	0.003172429	KRMEPPAIIITDTEIS	30	full	39206.50904	calibration_redo.csv	0.00010412	1.96E-05	1	9.604269207	1.809558685	3.647260685	0	0.509482835	3.636567669	0.944016095	0.146068628	0.214330082	0.070673442	0.25440598	-2.36308898	0.725796983	-0.438702198	0.248625411	639.6553799	137.0973899
889	6757.25603	2000	5418.5	3166.477994	3	0.765898088	2239.038062	KRMEPPAIIITDTEIS	Kd	9604.269207	1809.558685	5.307520164	0.003172429	KRMEPPAIIITDTEIS	30	full	39206.50904	calibration_redo.csv	0.00010412	1.96E-05	2	9.604269207	1.809558685	3.733879078	0.301029996	0.509482835	3.636567669	0.944016095	0.146068628	0.214330082	0.070673442	0.25440598	-2.36308898	0.725796983	-0.438702198	0.248625411	639.6553799	137.0973899
890	49.55534185	63	298.25	81.53062475	42	1.148896574	12.73294438	KRMEPIAIYITDTEIS	Kd	49780.46747	8833.915672	5.635153121	0.00243992	KRMEPIAIYITDTEIS	31	full	39206.50904	calibration_redo.csv	2.01E-05	3.56E-06	0.063	49.78046747	8.833915672	2.474580452	-1.200659451	0.430305931	2.977441331	0.987688861	1.121799711	0.204766915	1.046404524	0.246403142	-1.387357897	0.723030682	0.537028884	0.240430241	3315.436411	678.8916865
891	98.20193814	125	352.5	53.07399896	32	0.453805736	9.532371612	KRMEPIAIYITDTEIS	Kd	49780.46747	8833.915672	5.635153121	0.00243992	KRMEPIAIYITDTEIS	31	full	39206.50904	calibration_redo.csv	2.01E-05	3.56E-06	0.125	49.78046747	8.833915672	2.547159121	-0.903089987	0.430305931	2.977441331	0.987688861	1.121799711	0.204766915	1.046404524	0.246403142	-1.387357897	0.723030682	0.537028884	0.240430241	3315.436411	678.8916865
892	195.9131656	250	555	198.0989855	30	0.582101921	36.7860581	KRMEPIAIYITDTEIS	Kd	49780.46747	8833.915672	5.635153121	0.00243992	KRMEPIAIYITDTEIS	31	full	39206.50904	calibration_redo.csv	2.01E-05	3.56E-06	0.25	49.78046747	8.833915672	2.744292983	-0.602059991	0.430305931	2.977441331	0.987688861	1.121799711	0.204766915	1.046404524	0.246403142	-1.387357897	0.723030682	0.537028884	0.240430241	3315.436411	678.8916865
893	389.8781277	500	728.75	341.0046857	44	0.606291794	52.00272704	KRMEPIAIYITDTEIS	Kd	49780.46747	8833.915672	5.635153121	0.00243992	KRMEPIAIYITDTEIS	31	full	39206.50904	calibration_redo.csv	2.01E-05	3.56E-06	0.5	49.78046747	8.833915672	2.862578568	-0.301029996	0.430305931	2.977441331	0.987688861	1.121799711	0.204766915	1.046404524	0.246403142	-1.387357897	0.723030682	0.537028884	0.240430241	3315.436411	678.8916865
894	772.0785371	1000	929.5	629.4325574	38	0.775577982	103.478075	KRMEPIAIYITDTEIS	Kd	49780.46747	8833.915672	5.635153121	0.00243992	KRMEPIAIYITDTEIS	31	full	39206.50904	calibration_redo.csv	2.01E-05	3.56E-06	1	49.78046747	8.833915672	2.968249394	0	0.430305931	2.977441331	0.987688861	1.121799711	0.204766915	1.046404524	0.246403142	-1.387357897	0.723030682	0.537028884	0.240430241	3315.436411	678.8916865
895	1514.335847	2000	1269	252.4940419	16	0.228430334	65.19368129	KRMEPIAIYITDTEIS	Kd	49780.46747	8833.915672	5.635153121	0.00243992	KRMEPIAIYITDTEIS	31	full	39206.50904	calibration_redo.csv	2.01E-05	3.56E-06	2	49.78046747	8.833915672	3.103461622	0.301029996	0.430305931	2.977441331	0.987688861	1.121799711	0.204766915	1.046404524	0.246403142	-1.387357897	0.723030682	0.537028884	0.240430241	3315.436411	678.8916865
896	315.6472104	63	536	170.5035882	40	0.619084421	27.3024248	KRMEPIAIIITRTEIS	Kd	7762.223819	279.6807737	27.75386994	1.14E-06	KRMEPIAIIITRTEIS	32	full	39206.50904	calibration_redo.csv	0.000128829	4.64E-06	0.063	7.762223819	0.279680774	2.72916479	-1.200659451	0.787032438	3.6525682	0.990664802	0.019795896	0.108335454	-0.055599291	0.174704291	-2.489361713	0.701840757	-0.564974931	0.166173951	516.9730376	56.00650894
897	621.3610444	125	899.5	343.5194036	31	0.511570221	62.71777543	KRMEPIAIIITRTEIS	Kd	7762.223819	279.6807737	27.75386994	1.14E-06	KRMEPIAIIITRTEIS	32	full	39206.50904	calibration_redo.csv	0.000128829	4.64E-06	0.125	7.762223819	0.279680774	2.954001168	-0.903089987	0.787032438	3.6525682	0.990664802	0.019795896	0.108335454	-0.055599291	0.174704291	-2.489361713	0.701840757	-0.564974931	0.166173951	516.9730376	56.00650894
898	1223.33418	250	1267.5	516.1401282	43	0.43527939	79.64215083	KRMEPIAIIITRTEIS	Kd	7762.223819	279.6807737	27.75386994	1.14E-06	KRMEPIAIIITRTEIS	32	full	39206.50904	calibration_redo.csv	0.000128829	4.64E-06	0.25	7.762223819	0.279680774	3.102947968	-0.602059991	0.787032438	3.6525682	0.990664802	0.019795896	0.108335454	-0.055599291	0.174704291	-2.489361713	0.701840757	-0.564974931	0.166173951	516.9730376	56.00650894
899	2372.636586	500	2777.5	1035.265865	27	0.39707901	203.0323404	KRMEPIAIIITRTEIS	Kd	7762.223819	279.6807737	27.75386994	1.14E-06	KRMEPIAIIITRTEIS	32	full	39206.50904	calibration_redo.csv	0.000128829	4.64E-06	0.5	7.762223819	0.279680774	3.443654068	-0.301029996	0.787032438	3.6525682	0.990664802	0.019795896	0.108335454	-0.055599291	0.174704291	-2.489361713	0.701840757	-0.564974931	0.166173951	516.9730376	56.00650894
900	4474.492988	1000	4651.5	1550.454642	41	0.327805202	245.1484038	KRMEPIAIIITRTEIS	Kd	7762.223819	279.6807737	27.75386994	1.14E-06	KRMEPIAIIITRTEIS	32	full	39206.50904	calibration_redo.csv	0.000128829	4.64E-06	1	7.762223819	0.279680774	3.667593025	0	0.787032438	3.6525682	0.990664802	0.019795896	0.108335454	-0.055599291	0.174704291	-2.489361713	0.701840757	-0.564974931	0.166173951	516.9730376	56.00650894
901	8032.290544	2000	7735.5	2340.675635	12	0.30521926	705.7402581	KRMEPIAIIITRTEIS	Kd	7762.223819	279.6807737	27.75386994	1.14E-06	KRMEPIAIIITRTEIS	32	full	39206.50904	calibration_redo.csv	0.000128829	4.64E-06	2	7.762223819	0.279680774	3.88848839	0.301029996	0.787032438	3.6525682	0.990664802	0.019795896	0.108335454	-0.055599291	0.174704291	-2.489361713	0.701840757	-0.564974931	0.166173951	516.9730376	56.00650894
902	158.3958549	63	385.5	84.94802876	19	0.548890511	20.02244239	KRMEPIAIIITKTEIS	Kd	15530.90598	656.6645093	23.65120357	2.52E-06	KRMEPIAIIITKTEIS	33	full	39206.50904	calibration_redo.csv	6.44E-05	2.72E-06	0.063	15.53090598	0.656664509	2.586024382	-1.200659451	0.699201251	3.378761787	0.984578738	0.431078817	0.11057139	0.35568363	0.176099548	-2.078078791	0.702189369	-0.15369201	0.16764022	1034.376208	114.372415
903	313.0328986	125	530	106.1047289	33	0.319330238	18.75684333	KRMEPIAIIITKTEIS	Kd	15530.90598	656.6645093	23.65120357	2.52E-06	KRMEPIAIIITKTEIS	33	full	39206.50904	calibration_redo.csv	6.44E-05	2.72E-06	0.125	15.53090598	0.656664509	2.72427587	-0.903089987	0.699201251	3.378761787	0.984578738	0.431078817	0.11057139	0.35568363	0.176099548	-2.078078791	0.702189369	-0.15369201	0.16764022	1034.376208	114.372415
904	621.106752	250	900	280.9049543	29	0.400326487	53.08604651	KRMEPIAIIITKTEIS	Kd	15530.90598	656.6645093	23.65120357	2.52E-06	KRMEPIAIIITKTEIS	33	full	39206.50904	calibration_redo.csv	6.44E-05	2.72E-06	0.25	15.53090598	0.656664509	2.954242509	-0.602059991	0.699201251	3.378761787	0.984578738	0.431078817	0.11057139	0.35568363	0.176099548	-2.078078791	0.702189369	-0.15369201	0.16764022	1034.376208	114.372415
905	1222.841338	500	1310	353.5159953	21	0.348471456	79.04857967	KRMEPIAIIITKTEIS	Kd	15530.90598	656.6645093	23.65120357	2.52E-06	KRMEPIAIIITKTEIS	33	full	39206.50904	calibration_redo.csv	6.44E-05	2.72E-06	0.5	15.53090598	0.656664509	3.117271296	-0.301029996	0.699201251	3.378761787	0.984578738	0.431078817	0.11057139	0.35568363	0.176099548	-2.078078791	0.702189369	-0.15369201	0.16764022	1034.376208	114.372415
906	2371.709637	1000	2240.5	780.3969003	48	0.362012392	113.8325872	KRMEPIAIIITKTEIS	Kd	15530.90598	656.6645093	23.65120357	2.52E-06	KRMEPIAIIITKTEIS	33	full	39206.50904	calibration_redo.csv	6.44E-05	2.72E-06	1	15.53090598	0.656664509	3.350344948	0	0.699201251	3.378761787	0.984578738	0.431078817	0.11057139	0.35568363	0.176099548	-2.078078791	0.702189369	-0.15369201	0.16764022	1034.376208	114.372415
907	4472.844595	2000	4451.5	1943.082153	12	0.468650162	585.8613127	KRMEPIAIIITKTEIS	Kd	15530.90598	656.6645093	23.65120357	2.52E-06	KRMEPIAIIITKTEIS	33	full	39206.50904	calibration_redo.csv	6.44E-05	2.72E-06	2	15.53090598	0.656664509	3.648506378	0.301029996	0.699201251	3.378761787	0.984578738	0.431078817	0.11057139	0.35568363	0.176099548	-2.078078791	0.702189369	-0.15369201	0.16764022	1034.376208	114.372415
908	150.7371343	63	442	176.0721679	17	0.778877662	44.01804197	KRMEPIAIIITDTTIS	Kd	16323.20822	1680.058818	9.715855212	0.000196258	KRMEPIAIIITDTTIS	34	full	39206.50904	calibration_redo.csv	6.13E-05	6.31E-06	0.063	16.32320822	1.680058818	2.645422269	-1.200659451	0.62268701	3.408044494	0.993717538	0.460584089	0.145023444	0.385188902	0.19954152	-2.048573519	0.708431843	-0.124186737	0.192117179	1087.144449	157.6614323
909	297.9542552	125	680.5	349.3145339	17	0.924256354	87.32863348	KRMEPIAIIITDTTIS	Kd	16323.20822	1680.058818	9.715855212	0.000196258	KRMEPIAIIITDTTIS	34	full	39206.50904	calibration_redo.csv	6.13E-05	6.31E-06	0.125	16.32320822	1.680058818	2.83282813	-0.903089987	0.62268701	3.408044494	0.993717538	0.460584089	0.145023444	0.385188902	0.19954152	-2.048573519	0.708431843	-0.124186737	0.192117179	1087.144449	157.6614323
910	591.4139936	250	1209.5	115.1278275	6	0.114157489	51.48672968	KRMEPIAIIITDTTIS	Kd	16323.20822	1680.058818	9.715855212	0.000196258	KRMEPIAIIITDTTIS	34	full	39206.50904	calibration_redo.csv	6.13E-05	6.31E-06	0.25	16.32320822	1.680058818	3.082605873	-0.602059991	0.62268701	3.408044494	0.993717538	0.460584089	0.145023444	0.385188902	0.19954152	-2.048573519	0.708431843	-0.124186737	0.192117179	1087.144449	157.6614323
911	1165.250662	500	1618	273.9130812	11	0.188344672	86.61892174	KRMEPIAIIITDTTIS	Kd	16323.20822	1680.058818	9.715855212	0.000196258	KRMEPIAIIITDTTIS	34	full	39206.50904	calibration_redo.csv	6.13E-05	6.31E-06	0.5	16.32320822	1.680058818	3.208978517	-0.301029996	0.62268701	3.408044494	0.993717538	0.460584089	0.145023444	0.385188902	0.19954152	-2.048573519	0.708431843	-0.124186737	0.192117179	1087.144449	157.6614323
912	2263.236032	1000	2565.5	579.0616804	11	0.226103633	183.1153816	KRMEPIAIIITDTTIS	Kd	16323.20822	1680.058818	9.715855212	0.000196258	KRMEPIAIIITDTTIS	34	full	39206.50904	calibration_redo.csv	6.13E-05	6.31E-06	1	16.32320822	1.680058818	3.409172019	0	0.62268701	3.408044494	0.993717538	0.460584089	0.145023444	0.385188902	0.19954152	-2.048573519	0.708431843	-0.124186737	0.192117179	1087.144449	157.6614323
913	4279.437156	2000	3840.5	1245	2	0.345449501	1245	KRMEPIAIIITDTTIS	Kd	16323.20822	1680.058818	9.715855212	0.000196258	KRMEPIAIIITDTTIS	34	full	39206.50904	calibration_redo.csv	6.13E-05	6.31E-06	2	16.32320822	1.680058818	3.584387769	0.301029996	0.62268701	3.408044494	0.993717538	0.460584089	0.145023444	0.385188902	0.19954152	-2.048573519	0.708431843	-0.124186737	0.192117179	1087.144449	157.6614323
914	4.781120142	63	149	18.34433953	13	-0.217985753	5.295554684	ASGLSPRIEITPSHEL	Kd	516554.4444	362060.8973	1.426705972	0.213006885	ASGLSPRIEITPSHEL	39	full	39206.50904	calibration_redo.csv	1.94E-06	1.36E-06	0.063	516.5544444	362.0608973	2.173186268	-1.200659451	-0.043187804	2.132552132	-0.043241843	2.509157608	0.70832235	2.433762422	0.721460719	0	0.991243879	1.924386782	0.719442675	34403.12035	24368.49904
915	9.485211155	125	149.75	36.24035762	14	-0.463982631	10.05126674	ASGLSPRIEITPSHEL	Kd	516554.4444	362060.8973	1.426705972	0.213006885	ASGLSPRIEITPSHEL	39	full	39206.50904	calibration_redo.csv	1.94E-06	1.36E-06	0.125	516.5544444	362.0608973	2.175366831	-0.903089987	-0.043187804	2.132552132	-0.043241843	2.509157608	0.70832235	2.433762422	0.721460719	0	0.991243879	1.924386782	0.719442675	34403.12035	24368.49904
916	18.96583391	250	165.5	26.64920772	21	-0.376857483	5.958944001	ASGLSPRIEITPSHEL	Kd	516554.4444	362060.8973	1.426705972	0.213006885	ASGLSPRIEITPSHEL	39	full	39206.50904	calibration_redo.csv	1.94E-06	1.36E-06	0.25	516.5544444	362.0608973	2.218797998	-0.602059991	-0.043187804	2.132552132	-0.043241843	2.509157608	0.70832235	2.433762422	0.721460719	0	0.991243879	1.924386782	0.719442675	34403.12035	24368.49904
917	37.91332756	500	119	40.21592242	23	-0.325119935	8.574063468	ASGLSPRIEITPSHEL	Kd	516554.4444	362060.8973	1.426705972	0.213006885	ASGLSPRIEITPSHEL	39	full	39206.50904	calibration_redo.csv	1.94E-06	1.36E-06	0.5	516.5544444	362.0608973	2.075546961	-0.301029996	-0.043187804	2.132552132	-0.043241843	2.509157608	0.70832235	2.433762422	0.721460719	0	0.991243879	1.924386782	0.719442675	34403.12035	24368.49904
918	151.2146293	2000	137	45.6083028	9	-0.43551695	16.12497009	ASGLSPRIEITPSHEL	Kd	516554.4444	362060.8973	1.426705972	0.213006885	ASGLSPRIEITPSHEL	39	full	39206.50904	calibration_redo.csv	1.94E-06	1.36E-06	2	516.5544444	362.0608973	2.136720567	0.301029996	-0.043187804	2.132552132	-0.043241843	2.509157608	0.70832235	2.433762422	0.721460719	0	0.991243879	1.924386782	0.719442675	34403.12035	24368.49904
919	246.5655232	63	516	237.4916492	21	0.620159741	53.10474717	ASGLSPRILITPSHEL	Kd	9954.661989	1535.952939	6.481098304	0.001303791	ASGLSPRILITPSHEL	40	full	39206.50904	calibration_redo.csv	0.000100455	1.55E-05	0.063	9.954661989	1.535952939	2.712649702	-1.200659451	0.661001953	3.626038419	0.923157416	0.16731776	0.185054677	0.091922573	0.230282982	-2.341839848	0.717697088	-0.417453067	0.223880425	662.9919424	122.6897595
920	486.2081323	125	1170.5	531.9497977	33	0.52414324	94.03632729	ASGLSPRILITPSHEL	Kd	9954.661989	1535.952939	6.481098304	0.001303791	ASGLSPRILITPSHEL	40	full	39206.50904	calibration_redo.csv	0.000100455	1.55E-05	0.125	9.954661989	1.535952939	3.068371418	-0.903089987	0.661001953	3.626038419	0.923157416	0.16731776	0.185054677	0.091922573	0.230282982	-2.341839848	0.717697088	-0.417453067	0.223880425	662.9919424	122.6897595
921	960.5048428	250	2046.25	954.6424139	38	0.4995306	156.9422461	ASGLSPRILITPSHEL	Kd	9954.661989	1535.952939	6.481098304	0.001303791	ASGLSPRILITPSHEL	40	full	39206.50904	calibration_redo.csv	0.000100455	1.55E-05	0.25	9.954661989	1.535952939	3.310958692	-0.602059991	0.661001953	3.626038419	0.923157416	0.16731776	0.185054677	0.091922573	0.230282982	-2.341839848	0.717697088	-0.417453067	0.223880425	662.9919424	122.6897595
922	1875.073009	500	3531.5	2018.580998	34	0.561505988	351.3898485	ASGLSPRILITPSHEL	Kd	9954.661989	1535.952939	6.481098304	0.001303791	ASGLSPRILITPSHEL	40	full	39206.50904	calibration_redo.csv	0.000100455	1.55E-05	0.5	9.954661989	1.535952939	3.547959211	-0.301029996	0.661001953	3.626038419	0.923157416	0.16731776	0.185054677	0.091922573	0.230282982	-2.341839848	0.717697088	-0.417453067	0.223880425	662.9919424	122.6897595
923	3578.979349	1000	3765.75	1561.046801	28	0.378445418	300.4235968	ASGLSPRILITPSHEL	Kd	9954.661989	1535.952939	6.481098304	0.001303791	ASGLSPRILITPSHEL	40	full	39206.50904	calibration_redo.csv	0.000100455	1.55E-05	1	9.954661989	1.535952939	3.575851485	0	0.661001953	3.626038419	0.923157416	0.16731776	0.185054677	0.091922573	0.230282982	-2.341839848	0.717697088	-0.417453067	0.223880425	662.9919424	122.6897595
924	6559.199929	2000	5648	3394.363474	12	0.554819646	1023.439095	ASGLSPRILITPSHEL	Kd	9954.661989	1535.952939	6.481098304	0.001303791	ASGLSPRILITPSHEL	40	full	39206.50904	calibration_redo.csv	0.000100455	1.55E-05	2	9.954661989	1.535952939	3.751894688	0.301029996	0.661001953	3.626038419	0.923157416	0.16731776	0.185054677	0.091922573	0.230282982	-2.341839848	0.717697088	-0.417453067	0.223880425	662.9919424	122.6897595
925	95.37364287	63	443.5	77.1404459	23	0.420882518	16.44639833	ASGLSPRIAITPSHEL	Kd	25835.24605	3617.582802	7.141576975	0.000835927	ASGLSPRIAITPSHEL	41	full	39206.50904	calibration_redo.csv	3.87E-05	5.42E-06	0.063	25.83524605	3.617582802	2.646893624	-1.200659451	0.521921873	3.234729125	0.97285975	0.73286109	0.173335987	0.657465904	0.220975978	-1.776296518	0.714765165	0.148090264	0.214295533	1720.657113	298.2517988
926	188.7814785	125	483	214.2244047	15	0.618371225	57.25388044	ASGLSPRIAITPSHEL	Kd	25835.24605	3617.582802	7.141576975	0.000835927	ASGLSPRIAITPSHEL	41	full	39206.50904	calibration_redo.csv	3.87E-05	5.42E-06	0.125	25.83524605	3.617582802	2.683947131	-0.903089987	0.521921873	3.234729125	0.97285975	0.73286109	0.173335987	0.657465904	0.220975978	-1.776296518	0.714765165	0.148090264	0.214295533	1720.657113	298.2517988
927	375.7536825	250	881.5	319.0393723	16	0.481341816	82.37561172	ASGLSPRIAITPSHEL	Kd	25835.24605	3617.582802	7.141576975	0.000835927	ASGLSPRIAITPSHEL	41	full	39206.50904	calibration_redo.csv	3.87E-05	5.42E-06	0.25	25.83524605	3.617582802	2.945222317	-0.602059991	0.521921873	3.234729125	0.97285975	0.73286109	0.173335987	0.657465904	0.220975978	-1.776296518	0.714765165	0.148090264	0.214295533	1720.657113	298.2517988
928	744.3733195	500	1284.5	396.4711766	26	0.357993735	79.29423532	ASGLSPRIAITPSHEL	Kd	25835.24605	3617.582802	7.141576975	0.000835927	ASGLSPRIAITPSHEL	41	full	39206.50904	calibration_redo.csv	3.87E-05	5.42E-06	0.5	25.83524605	3.617582802	3.108734109	-0.301029996	0.521921873	3.234729125	0.97285975	0.73286109	0.173335987	0.657465904	0.220975978	-1.776296518	0.714765165	0.148090264	0.214295533	1720.657113	298.2517988
929	1461.007996	1000	1669	432.5566076	16	0.284857825	111.6856358	ASGLSPRIAITPSHEL	Kd	25835.24605	3617.582802	7.141576975	0.000835927	ASGLSPRIAITPSHEL	41	full	39206.50904	calibration_redo.csv	3.87E-05	5.42E-06	1	25.83524605	3.617582802	3.222456337	0	0.521921873	3.234729125	0.97285975	0.73286109	0.173335987	0.657465904	0.220975978	-1.776296518	0.714765165	0.148090264	0.214295533	1720.657113	298.2517988
930	2817.040595	2000	2448.5	1325.272521	12	0.485470038	399.5846998	ASGLSPRIAITPSHEL	Kd	25835.24605	3617.582802	7.141576975	0.000835927	ASGLSPRIAITPSHEL	41	full	39206.50904	calibration_redo.csv	3.87E-05	5.42E-06	2	25.83524605	3.617582802	3.388900108	0.301029996	0.521921873	3.234729125	0.97285975	0.73286109	0.173335987	0.657465904	0.220975978	-1.776296518	0.714765165	0.148090264	0.214295533	1720.657113	298.2517988
931	23.82700274	63	248.5	60.57887889	23	2.924059212	12.91546037	ASGLSPRIEISPSHEL	Kd	103601.3214	21387.71923	4.843963036	0.004698607	ASGLSPRIEISPSHEL	42	full	39206.50904	calibration_redo.csv	9.65E-06	1.99E-06	0.063	103.6013214	21.38771923	2.395326393	-1.200659451	0.244482764	2.61902379	0.52485595	1.556425657	0.23034074	1.481030471	0.268033347	-0.952731951	0.730685113	0.971654831	0.262552981	6899.96721	1589.343552
932	47.24754107	125	231	61.26881797	30	8.260964221	11.37733387	ASGLSPRIEISPSHEL	Kd	103601.3214	21387.71923	4.843963036	0.004698607	ASGLSPRIEISPSHEL	42	full	39206.50904	calibration_redo.csv	9.65E-06	1.99E-06	0.125	103.6013214	21.38771923	2.36361198	-0.903089987	0.244482764	2.61902379	0.52485595	1.556425657	0.23034074	1.481030471	0.268033347	-0.952731951	0.730685113	0.971654831	0.262552981	6899.96721	1589.343552
933	94.38134372	250	314.75	36.51890207	24	0.540020733	7.614717467	ASGLSPRIEISPSHEL	Kd	103601.3214	21387.71923	4.843963036	0.004698607	ASGLSPRIEISPSHEL	42	full	39206.50904	calibration_redo.csv	9.65E-06	1.99E-06	0.25	103.6013214	21.38771923	2.497965739	-0.602059991	0.244482764	2.61902379	0.52485595	1.556425657	0.23034074	1.481030471	0.268033347	-0.952731951	0.730685113	0.971654831	0.262552981	6899.96721	1589.343552
934	188.3093726	500	298.5	105.8292934	19	2.788844069	24.94420366	ASGLSPRIEISPSHEL	Kd	103601.3214	21387.71923	4.843963036	0.004698607	ASGLSPRIEISPSHEL	42	full	39206.50904	calibration_redo.csv	9.65E-06	1.99E-06	0.5	103.6013214	21.38771923	2.474944335	-0.301029996	0.244482764	2.61902379	0.52485595	1.556425657	0.23034074	1.481030471	0.268033347	-0.952731951	0.730685113	0.971654831	0.262552981	6899.96721	1589.343552
935	374.8184872	1000	296.25	89.08773332	18	1.254266093	21.60694908	ASGLSPRIEISPSHEL	Kd	103601.3214	21387.71923	4.843963036	0.004698607	ASGLSPRIEISPSHEL	42	full	39206.50904	calibration_redo.csv	9.65E-06	1.99E-06	1	103.6013214	21.38771923	2.471658359	0	0.244482764	2.61902379	0.52485595	1.556425657	0.23034074	1.481030471	0.268033347	-0.952731951	0.730685113	0.971654831	0.262552981	6899.96721	1589.343552
936	742.5382282	2000	706.5	5293.379866	7	2.042480449	2161.013281	ASGLSPRIEISPSHEL	Kd	103601.3214	21387.71923	4.843963036	0.004698607	ASGLSPRIEISPSHEL	42	full	39206.50904	calibration_redo.csv	9.65E-06	1.99E-06	2	103.6013214	21.38771923	2.849112166	0.301029996	0.244482764	2.61902379	0.52485595	1.556425657	0.23034074	1.481030471	0.268033347	-0.952731951	0.730685113	0.971654831	0.262552981	6899.96721	1589.343552
937	22.80340807	63	172.25	53.01957088	22	-0.980605767	11.5698189	ASGLSPRIEIFPSHEL	Kd	108254.584	25816.22154	4.19327762	0.008544741	ASGLSPRIEIFPSHEL	43	full	39206.50904	calibration_redo.csv	9.24E-06	2.20E-06	0.063	108.254584	25.81622154	2.236159231	-1.200659451	0.34099217	2.668588954	0.963675244	1.582479484	0.259440911	1.507084298	0.293418821	-0.926678124	0.740373867	0.997708658	0.288421215	7209.879853	1870.537794
938	45.21897435	125	231	40.18607138	29	-11.1521155	7.594453646	ASGLSPRIEIFPSHEL	Kd	108254.584	25816.22154	4.19327762	0.008544741	ASGLSPRIEIFPSHEL	43	full	39206.50904	calibration_redo.csv	9.24E-06	2.20E-06	0.125	108.254584	25.81622154	2.36361198	-0.903089987	0.34099217	2.668588954	0.963675244	1.582479484	0.259440911	1.507084298	0.293418821	-0.926678124	0.740373867	0.997708658	0.288421215	7209.879853	1870.537794
939	90.33376191	250	289.75	77.27311497	22	1.429780092	16.86237612	ASGLSPRIEIFPSHEL	Kd	108254.584	25816.22154	4.19327762	0.008544741	ASGLSPRIEIFPSHEL	43	full	39206.50904	calibration_redo.csv	9.24E-06	2.20E-06	0.25	108.254584	25.81622154	2.462023445	-0.602059991	0.34099217	2.668588954	0.963675244	1.582479484	0.259440911	1.507084298	0.293418821	-0.926678124	0.740373867	0.997708658	0.288421215	7209.879853	1870.537794
940	180.2522137	500	426.25	241.0804456	16	0.837812148	62.24670339	ASGLSPRIEIFPSHEL	Kd	108254.584	25816.22154	4.19327762	0.008544741	ASGLSPRIEIFPSHEL	43	full	39206.50904	calibration_redo.csv	9.24E-06	2.20E-06	0.5	108.254584	25.81622154	2.629664392	-0.301029996	0.34099217	2.668588954	0.963675244	1.582479484	0.259440911	1.507084298	0.293418821	-0.926678124	0.740373867	0.997708658	0.288421215	7209.879853	1870.537794
941	358.8545907	1000	444.5	142.6152187	26	0.659433698	28.52304373	ASGLSPRIEIFPSHEL	Kd	108254.584	25816.22154	4.19327762	0.008544741	ASGLSPRIEIFPSHEL	43	full	39206.50904	calibration_redo.csv	9.24E-06	2.20E-06	1	108.254584	25.81622154	2.647871765	0	0.34099217	2.668588954	0.963675244	1.582479484	0.259440911	1.507084298	0.293418821	-0.926678124	0.740373867	0.997708658	0.288421215	7209.879853	1870.537794
942	711.1996183	2000	561.75	178.8834299	22	0.464824362	39.03556468	ASGLSPRIEIFPSHEL	Kd	108254.584	25816.22154	4.19327762	0.008544741	ASGLSPRIEIFPSHEL	43	full	39206.50904	calibration_redo.csv	9.24E-06	2.20E-06	2	108.254584	25.81622154	2.749543081	0.301029996	0.34099217	2.668588954	0.963675244	1.582479484	0.259440911	1.507084298	0.293418821	-0.926678124	0.740373867	0.997708658	0.288421215	7209.879853	1870.537794
943	163.4572714	63	464.25	315.1217652	42	1.120622678	49.21375152	ASGLLPRIEITPSHEL	Kd	15048.0443	2925.600063	5.143575327	0.003634414	ASGLLPRIEITPSHEL	44	full	39206.50904	calibration_redo.csv	6.65E-05	1.29E-05	0.063	15.0480443	2.925600063	2.666751912	-1.200659451	0.584507241	3.481029753	0.910010705	0.412349542	0.219627916	0.336954356	0.258884994	-2.096808066	0.727379061	-0.172421284	0.253206699	1002.217065	220.1148451
944	322.9947486	125	1050	406.6153123	30	0.531129855	75.50656793	ASGLLPRIEITPSHEL	Kd	15048.0443	2925.600063	5.143575327	0.003634414	ASGLLPRIEITPSHEL	44	full	39206.50904	calibration_redo.csv	6.65E-05	1.29E-05	0.125	15.0480443	2.925600063	3.021189299	-0.903089987	0.584507241	3.481029753	0.910010705	0.412349542	0.219627916	0.336954356	0.258884994	-2.096808066	0.727379061	-0.172421284	0.253206699	1002.217065	220.1148451
945	640.7111306	250	1386	707.4809528	44	0.561087994	107.8898338	ASGLLPRIEITPSHEL	Kd	15048.0443	2925.600063	5.143575327	0.003634414	ASGLLPRIEITPSHEL	44	full	39206.50904	calibration_redo.csv	6.65E-05	1.29E-05	0.25	15.0480443	2.925600063	3.14176323	-0.602059991	0.584507241	3.481029753	0.910010705	0.412349542	0.219627916	0.336954356	0.258884994	-2.096808066	0.727379061	-0.172421284	0.253206699	1002.217065	220.1148451
946	1260.818026	500	2684	700.8114029	36	0.306620692	118.4587478	ASGLLPRIEITPSHEL	Kd	15048.0443	2925.600063	5.143575327	0.003634414	ASGLLPRIEITPSHEL	44	full	39206.50904	calibration_redo.csv	6.65E-05	1.29E-05	0.5	15.0480443	2.925600063	3.428782511	-0.301029996	0.584507241	3.481029753	0.910010705	0.412349542	0.219627916	0.336954356	0.258884994	-2.096808066	0.727379061	-0.172421284	0.253206699	1002.217065	220.1148451
947	2443.070838	1000	3053	1150.889115	33	0.391882998	203.4503744	ASGLLPRIEITPSHEL	Kd	15048.0443	2925.600063	5.143575327	0.003634414	ASGLLPRIEITPSHEL	44	full	39206.50904	calibration_redo.csv	6.65E-05	1.29E-05	1	15.0480443	2.925600063	3.484726804	0	0.584507241	3.481029753	0.910010705	0.412349542	0.219627916	0.336954356	0.258884994	-2.096808066	0.727379061	-0.172421284	0.253206699	1002.217065	220.1148451
948	4599.531576	2000	3642.5	866.683239	7	0.230050724	353.8219507	ASGLLPRIEITPSHEL	Kd	15048.0443	2925.600063	5.143575327	0.003634414	ASGLLPRIEITPSHEL	44	full	39206.50904	calibration_redo.csv	6.65E-05	1.29E-05	2	15.0480443	2.925600063	3.56139956	0.301029996	0.584507241	3.481029753	0.910010705	0.412349542	0.219627916	0.336954356	0.258884994	-2.096808066	0.727379061	-0.172421284	0.253206699	1002.217065	220.1148451
949	76.11042911	63	243.75	51.26231559	20	2.770935978	11.76038175	ASGLSPRIEITPFHEL	Kd	32389.97784	4153.031808	7.799116246	0.000555222	ASGLSPRIEITPFHEL	45	full	39206.50904	calibration_redo.csv	3.09E-05	3.96E-06	0.063	32.38997784	4.153031808	2.386944624	-1.200659451	0.582112043	2.988697044	0.736462483	0.866943943	0.163946995	0.791548757	0.213690514	-1.642213665	0.712546486	0.282173117	0.206774825	2157.209792	353.6680621
950	150.724803	125	272.5	72.92612021	11	1.485532078	23.06126408	ASGLSPRIEITPFHEL	Kd	32389.97784	4153.031808	7.799116246	0.000555222	ASGLSPRIEITPFHEL	45	full	39206.50904	calibration_redo.csv	3.09E-05	3.96E-06	0.125	32.38997784	4.153031808	2.435366507	-0.903089987	0.582112043	2.988697044	0.736462483	0.866943943	0.163946995	0.791548757	0.213690514	-1.642213665	0.712546486	0.282173117	0.206774825	2157.209792	353.6680621
951	300.2951567	250	485.5	220.9430842	18	0.815204574	53.58656902	ASGLSPRIEITPFHEL	Kd	32389.97784	4153.031808	7.799116246	0.000555222	ASGLSPRIEITPFHEL	45	full	39206.50904	calibration_redo.csv	3.09E-05	3.96E-06	0.25	32.38997784	4.153031808	2.686189234	-0.602059991	0.582112043	2.988697044	0.736462483	0.866943943	0.163946995	0.791548757	0.213690514	-1.642213665	0.712546486	0.282173117	0.206774825	2157.209792	353.6680621
952	596.0251665	500	458.5	694.8432414	13	1.45928306	200.5839662	ASGLSPRIEITPFHEL	Kd	32389.97784	4153.031808	7.799116246	0.000555222	ASGLSPRIEITPFHEL	45	full	39206.50904	calibration_redo.csv	3.09E-05	3.96E-06	0.5	32.38997784	4.153031808	2.66133934	-0.301029996	0.582112043	2.988697044	0.736462483	0.866943943	0.163946995	0.791548757	0.213690514	-1.642213665	0.712546486	0.282173117	0.206774825	2157.209792	353.6680621
953	1174.199912	1000	595.5	487.5498016	23	1.077768796	103.945967	ASGLSPRIEITPFHEL	Kd	32389.97784	4153.031808	7.799116246	0.000555222	ASGLSPRIEITPFHEL	45	full	39206.50904	calibration_redo.csv	3.09E-05	3.96E-06	1	32.38997784	4.153031808	2.774881766	0	0.582112043	2.988697044	0.736462483	0.866943943	0.163946995	0.791548757	0.213690514	-1.642213665	0.712546486	0.282173117	0.206774825	2157.209792	353.6680621
954	2280.112492	2000	2584.5	1320.49909	7	0.61785994	539.0914961	ASGLSPRIEITPFHEL	Kd	32389.97784	4153.031808	7.799116246	0.000555222	ASGLSPRIEITPFHEL	45	full	39206.50904	calibration_redo.csv	3.09E-05	3.96E-06	2	32.38997784	4.153031808	3.412376537	0.301029996	0.582112043	2.988697044	0.736462483	0.866943943	0.163946995	0.791548757	0.213690514	-1.642213665	0.712546486	0.282173117	0.206774825	2157.209792	353.6680621
955	34.58666438	63	258	29.45233437	10	1.465290267	9.817444791	ASGLSPRIEITASHEL	Kd	71352.09925	20466.74189	3.486246107	0.025208574	ASGLSPRIEITASHEL	46	full	39206.50904	calibration_redo.csv	1.40E-05	4.02E-06	0.063	71.35209925	20.46674189	2.411619706	-1.200659451	0.209373312	2.611518848	0.741354812	1.335282129	0.304493633	1.259886942	0.333918241	-1.173875479	0.757337606	0.750511302	0.329535406	4752.131908	1446.99391
956	68.5648086	125	220.5	47.64054263	13	-1.953713105	13.75264005	ASGLSPRIEITASHEL	Kd	71352.09925	20466.74189	3.486246107	0.025208574	ASGLSPRIEITASHEL	46	full	39206.50904	calibration_redo.csv	1.40E-05	4.02E-06	0.125	71.35209925	20.46674189	2.343408594	-0.903089987	0.209373312	2.611518848	0.741354812	1.335282129	0.304493633	1.259886942	0.333918241	-1.173875479	0.757337606	0.750511302	0.329535406	4752.131908	1446.99391
957	136.890222	250	319.5	59.00424887	19	0.764720824	13.90743483	ASGLSPRIEITASHEL	Kd	71352.09925	20466.74189	3.486246107	0.025208574	ASGLSPRIEITASHEL	46	full	39206.50904	calibration_redo.csv	1.40E-05	4.02E-06	0.25	71.35209925	20.46674189	2.504470862	-0.602059991	0.209373312	2.611518848	0.741354812	1.335282129	0.304493633	1.259886942	0.333918241	-1.173875479	0.757337606	0.750511302	0.329535406	4752.131908	1446.99391
958	272.8278606	500	348.5	62.8702604	14	0.499962309	17.43707289	ASGLSPRIEITASHEL	Kd	71352.09925	20466.74189	3.486246107	0.025208574	ASGLSPRIEITASHEL	46	full	39206.50904	calibration_redo.csv	1.40E-05	4.02E-06	0.5	71.35209925	20.46674189	2.542202782	-0.301029996	0.209373312	2.611518848	0.741354812	1.335282129	0.304493633	1.259886942	0.333918241	-1.173875479	0.757337606	0.750511302	0.329535406	4752.131908	1446.99391
959	541.8848857	1000	423	181.8866298	16	0.749854696	46.96292587	ASGLSPRIEITASHEL	Kd	71352.09925	20466.74189	3.486246107	0.025208574	ASGLSPRIEITASHEL	46	full	39206.50904	calibration_redo.csv	1.40E-05	4.02E-06	1	71.35209925	20.46674189	2.626340367	0	0.209373312	2.611518848	0.741354812	1.335282129	0.304493633	1.259886942	0.333918241	-1.173875479	0.757337606	0.750511302	0.329535406	4752.131908	1446.99391
