# Supplementary material for: Quantitative mapping of protein-peptide affinity landscapes using spectrally encoded beads
Source: eLife journal article supplement (doi:10.7554/elife.40499), 2019-07-08
Supplement: supp [file elife-40499-supp-v1.zip › elife_poa_e40499_Figure_5_source_data_2.csv]

	.fitted	Conc	MED	SD	N	CV	SEM	full_sequence	term	kd_nM	kd_error	statistic	p.value	seq	seq_index	CVidx	Rmax	file	ka	ka_error	Conc_uM	kd_uM	kd_error_uM	MED_L10	Conc_L10	lm_x	lm_a	lm_r2	ddG_PVIVIT	ddGE_PVIVIT	ddG_PKIVIT	ddGE_PKIVIT	ddG_PRIEIT	ddGE_PRIEIT	ddG_IAIIIT	ddGE_IAIIIT	kd_true	kdE_true
960	52.52079904	1000	137.75	1658.887502	104	-7.607394677	163.4550425	SCRAMBLED	Kd	121964.4132	136959.8983	0.890511856	0.413982658	SCRAMBLED	1	full	6458.189236	calibration2.csv	8.20E-06	9.21E-06	1	121.9644132	136.9598983	2.139091608	0	-0.020996153	2.144692804	0.087421501	2.738910844	1.152723807	2.254051001	1.149462304	1.448481247	1.148019196	3.004972254	1.135123689	50682.94623	58423.43875
961	6.612151154	125	147.75	272.8562935	112	-69.21835758	25.89837327	SCRAMBLED	Kd	121964.4132	136959.8983	0.890511856	0.413982658	SCRAMBLED	1	full	6458.189236	calibration2.csv	8.20E-06	9.21E-06	0.125	121.9644132	136.9598983	2.16952749	-0.903089987	-0.020996153	2.144692804	0.087421501	2.738910844	1.152723807	2.254051001	1.149462304	1.448481247	1.148019196	3.004972254	1.135123689	50682.94623	58423.43875
962	13.21077659	250	137	356.340362	75	-3.876635792	41.42372567	SCRAMBLED	Kd	121964.4132	136959.8983	0.890511856	0.413982658	SCRAMBLED	1	full	6458.189236	calibration2.csv	8.20E-06	9.21E-06	0.25	121.9644132	136.9598983	2.136720567	-0.602059991	-0.020996153	2.144692804	0.087421501	2.738910844	1.152723807	2.254051001	1.149462304	1.448481247	1.148019196	3.004972254	1.135123689	50682.94623	58423.43875
963	26.36761597	500	148	159.2149897	93	-3.247147816	16.59931014	SCRAMBLED	Kd	121964.4132	136959.8983	0.890511856	0.413982658	SCRAMBLED	1	full	6458.189236	calibration2.csv	8.20E-06	9.21E-06	0.5	121.9644132	136.9598983	2.170261715	-0.301029996	-0.020996153	2.144692804	0.087421501	2.738910844	1.152723807	2.254051001	1.149462304	1.448481247	1.148019196	3.004972254	1.135123689	50682.94623	58423.43875
964	3.334217379	63	148.25	12.04525217	78	-0.416642869	1.372683881	SCRAMBLED	Kd	121964.4132	136959.8983	0.890511856	0.413982658	SCRAMBLED	1	full	6458.189236	calibration2.csv	8.20E-06	9.21E-06	0.063	121.9644132	136.9598983	2.170994702	-1.200659451	-0.020996153	2.144692804	0.087421501	2.738910844	1.152723807	2.254051001	1.149462304	1.448481247	1.148019196	3.004972254	1.135123689	50682.94623	58423.43875
965	61.36985775	1000	144	644.2938379	125	-5.507726431	57.85929468	SCRAMBLED	Kd	104233.8961	98199.3396	1.061452109	0.337041371	SCRAMBLED	2	full	6458.189236	calibration2.csv	9.59E-06	9.04E-06	1	104.2338961	98.1993396	2.158362492	0	-0.406862681	1.835915246	0.309558557	2.738910844	1.152723807	2.254051001	1.149462304	1.448481247	1.148019196	3.004972254	1.135123689	50682.94623	58423.43875
966	7.735551874	125	148	142.8699167	100	-9.607929839	14.3589669	SCRAMBLED	Kd	104233.8961	98199.3396	1.061452109	0.337041371	SCRAMBLED	2	full	6458.189236	calibration2.csv	9.59E-06	9.04E-06	0.125	104.2338961	98.1993396	2.170261715	-0.903089987	-0.406862681	1.835915246	0.309558557	2.738910844	1.152723807	2.254051001	1.149462304	1.448481247	1.148019196	3.004972254	1.135123689	50682.94623	58423.43875
967	121.5843431	2000	21	433.8968774	88	-2.260481616	46.51862811	SCRAMBLED	Kd	104233.8961	98199.3396	1.061452109	0.337041371	SCRAMBLED	2	full	6458.189236	calibration2.csv	9.59E-06	9.04E-06	2	104.2338961	98.1993396	1.322219295	0.301029996	-0.406862681	1.835915246	0.309558557	2.738910844	1.152723807	2.254051001	1.149462304	1.448481247	1.148019196	3.004972254	1.135123689	50682.94623	58423.43875
968	15.45259479	250	135	160.5498218	71	-6.239210372	19.18937403	SCRAMBLED	Kd	104233.8961	98199.3396	1.061452109	0.337041371	SCRAMBLED	2	full	6458.189236	calibration2.csv	9.59E-06	9.04E-06	0.25	104.2338961	98.1993396	2.130333768	-0.602059991	-0.406862681	1.835915246	0.309558557	2.738910844	1.152723807	2.254051001	1.149462304	1.448481247	1.148019196	3.004972254	1.135123689	50682.94623	58423.43875
969	30.83141884	500	144.25	145.409643	98	-2.831342145	14.76411234	SCRAMBLED	Kd	104233.8961	98199.3396	1.061452109	0.337041371	SCRAMBLED	2	full	6458.189236	calibration2.csv	9.59E-06	9.04E-06	0.5	104.2338961	98.1993396	2.159115822	-0.301029996	-0.406862681	1.835915246	0.309558557	2.738910844	1.152723807	2.254051001	1.149462304	1.448481247	1.148019196	3.004972254	1.135123689	50682.94623	58423.43875
970	3.901035764	63	150	38.45424364	99	-1.210483345	3.884465207	SCRAMBLED	Kd	104233.8961	98199.3396	1.061452109	0.337041371	SCRAMBLED	2	full	6458.189236	calibration2.csv	9.59E-06	9.04E-06	0.063	104.2338961	98.1993396	2.176091259	-1.200659451	-0.406862681	1.835915246	0.309558557	2.738910844	1.152723807	2.254051001	1.149462304	1.448481247	1.148019196	3.004972254	1.135123689	50682.94623	58423.43875
971	2931.264136	1000	2953	1933.721393	89	0.572921108	206.1353931	MAGPHPVIVITGPHEE	Kd	1203.209583	313.1957109	3.841717947	0.012102532	HPVIVITGPH	3	full	6458.189236	calibration2.csv	0.00083111	0.000216338	1	1.203209583	0.313195711	3.470263447	0	0.389574038	3.432844771	0.86171796	0	0.368120092	-0.484859843	0.357776208	-1.290429597	0.353112306	0.266061409	0.30861953	500	184.0600459
972	607.7908672	125	1414.5	588.8379374	100	0.451699662	59.18043941	MAGPHPVIVITGPHEE	Kd	1203.209583	313.1957109	3.841717947	0.012102532	HPVIVITGPH	3	full	6458.189236	calibration2.csv	0.00083111	0.000216338	0.125	1.203209583	0.313195711	3.150602952	-0.903089987	0.389574038	3.432844771	0.86171796	0	0.368120092	-0.484859843	0.357776208	-1.290429597	0.353112306	0.266061409	0.30861953	500	184.0600459
973	4032.323873	2000	2893	4492.945319	88	0.960869806	481.6942995	MAGPHPVIVITGPHEE	Kd	1203.209583	313.1957109	3.841717947	0.012102532	HPVIVITGPH	3	full	6458.189236	calibration2.csv	0.00083111	0.000216338	2	1.203209583	0.313195711	3.461348434	0.301029996	0.389574038	3.432844771	0.86171796	0	0.368120092	-0.484859843	0.357776208	-1.290429597	0.353112306	0.266061409	0.30861953	500	184.0600459
974	1111.02165	250	1745.75	593.2142388	102	0.356742756	59.02702294	MAGPHPVIVITGPHEE	Kd	1203.209583	313.1957109	3.841717947	0.012102532	HPVIVITGPH	3	full	6458.189236	calibration2.csv	0.00083111	0.000216338	0.25	1.203209583	0.313195711	3.241982051	-0.602059991	0.389574038	3.432844771	0.86171796	0	0.368120092	-0.484859843	0.357776208	-1.290429597	0.353112306	0.266061409	0.30861953	500	184.0600459
975	1895.888004	500	2300	1167.543192	85	0.507425024	127.389406	MAGPHPVIVITGPHEE	Kd	1203.209583	313.1957109	3.841717947	0.012102532	HPVIVITGPH	3	full	6458.189236	calibration2.csv	0.00083111	0.000216338	0.5	1.203209583	0.313195711	3.361727836	-0.301029996	0.389574038	3.432844771	0.86171796	0	0.368120092	-0.484859843	0.357776208	-1.290429597	0.353112306	0.266061409	0.30861953	500	184.0600459
976	321.3258905	63	719.5	249.7098558	113	0.461476539	23.59536352	MAGPHPVIVITGPHEE	Kd	1203.209583	313.1957109	3.841717947	0.012102532	HPVIVITGPH	3	full	6458.189236	calibration2.csv	0.00083111	0.000216338	0.063	1.203209583	0.313195711	2.857030798	-1.200659451	0.389574038	3.432844771	0.86171796	0	0.368120092	-0.484859843	0.357776208	-1.290429597	0.353112306	0.266061409	0.30861953	500	184.0600459
977	3091.548886	1000	3177	2353.880045	73	0.670415703	277.4074236	MAGPHPVIVITGPHEE	Kd	1088.981761	292.740562	3.719955149	0.013712746	HPVIVITGPH	4	full	6458.189236	calibration2.csv	0.000918289	0.000246855	1	1.088981761	0.292740562	3.502017215	0	0.385440503	3.447540493	0.850519154	0	0.368120092	-0.484859843	0.357776208	-1.290429597	0.353112306	0.266061409	0.30861953	500	184.0600459
978	664.9800519	125	1456.5	736.369251	60	0.520819444	95.86711087	MAGPHPVIVITGPHEE	Kd	1088.981761	292.740562	3.719955149	0.013712746	HPVIVITGPH	4	full	6458.189236	calibration2.csv	0.000918289	0.000246855	0.125	1.088981761	0.292740562	3.163310489	-0.903089987	0.385440503	3.447540493	0.850519154	0	0.368120092	-0.484859843	0.357776208	-1.290429597	0.353112306	0.266061409	0.30861953	500	184.0600459
979	4181.435655	2000	2891.75	3681.220496	56	0.976360879	496.3756704	MAGPHPVIVITGPHEE	Kd	1088.981761	292.740562	3.719955149	0.013712746	HPVIVITGPH	4	full	6458.189236	calibration2.csv	0.000918289	0.000246855	2	1.088981761	0.292740562	3.461160744	0.301029996	0.385440503	3.447540493	0.850519154	0	0.368120092	-0.484859843	0.357776208	-1.290429597	0.353112306	0.266061409	0.30861953	500	184.0600459
980	1205.802316	250	1678	653.2272061	77	0.429266938	74.93029943	MAGPHPVIVITGPHEE	Kd	1088.981761	292.740562	3.719955149	0.013712746	HPVIVITGPH	4	full	6458.189236	calibration2.csv	0.000918289	0.000246855	0.25	1.088981761	0.292740562	3.224791956	-0.602059991	0.385440503	3.447540493	0.850519154	0	0.368120092	-0.484859843	0.357776208	-1.290429597	0.353112306	0.266061409	0.30861953	500	184.0600459
981	2032.178529	500	2526	1214.050987	57	0.508882578	162.2343872	MAGPHPVIVITGPHEE	Kd	1088.981761	292.740562	3.719955149	0.013712746	HPVIVITGPH	4	full	6458.189236	calibration2.csv	0.000918289	0.000246855	0.5	1.088981761	0.292740562	3.402433346	-0.301029996	0.385440503	3.447540493	0.850519154	0	0.368120092	-0.484859843	0.357776208	-1.290429597	0.353112306	0.266061409	0.30861953	500	184.0600459
982	353.1878157	63	773.75	257.424648	78	0.444459455	29.33626129	MAGPHPVIVITGPHEE	Kd	1088.981761	292.740562	3.719955149	0.013712746	HPVIVITGPH	4	full	6458.189236	calibration2.csv	0.000918289	0.000246855	0.063	1.088981761	0.292740562	2.888600662	-1.200659451	0.385440503	3.447540493	0.850519154	0	0.368120092	-0.484859843	0.357776208	-1.290429597	0.353112306	0.266061409	0.30861953	500	184.0600459
983	2465.628161	1000	2660.75	1951.886423	78	0.688879271	222.438102	MAGPHPRIVITGPHEE	Kd	1619.287586	393.9815845	4.110059074	0.009263328	HPRIVITGPH	5	full	6458.189236	calibration2.csv	0.000617556	0.000150255	1	1.619287586	0.393981585	3.425004071	0	0.443321254	3.376551626	0.859890539	0.176117236	0.356305725	-0.308742607	0.345608424	-1.114312361	0.340778035	0.442178645	0.294427211	672.9033781	239.7593262
984	462.8099522	125	1178	624.8580953	107	0.569679086	60.69158339	MAGPHPRIVITGPHEE	Kd	1619.287586	393.9815845	4.110059074	0.009263328	HPRIVITGPH	5	full	6458.189236	calibration2.csv	0.000617556	0.000150255	0.125	1.619287586	0.393981585	3.07114529	-0.903089987	0.443321254	3.376551626	0.859890539	0.176117236	0.356305725	-0.308742607	0.345608424	-1.114312361	0.340778035	0.442178645	0.294427211	672.9033781	239.7593262
985	3568.762681	2000	2573.5	3675.75429	84	0.91339027	403.4664496	MAGPHPRIVITGPHEE	Kd	1619.287586	393.9815845	4.110059074	0.009263328	HPRIVITGPH	5	full	6458.189236	calibration2.csv	0.000617556	0.000150255	2	1.619287586	0.393981585	3.410524173	0.301029996	0.443321254	3.376551626	0.859890539	0.176117236	0.356305725	-0.308742607	0.345608424	-1.114312361	0.340778035	0.442178645	0.294427211	672.9033781	239.7593262
986	863.7233354	250	1331	538.8020261	87	0.456302973	58.10051668	MAGPHPRIVITGPHEE	Kd	1619.287586	393.9815845	4.110059074	0.009263328	HPRIVITGPH	5	full	6458.189236	calibration2.csv	0.000617556	0.000150255	0.25	1.619287586	0.393981585	3.124178055	-0.602059991	0.443321254	3.376551626	0.859890539	0.176117236	0.356305725	-0.308742607	0.345608424	-1.114312361	0.340778035	0.442178645	0.294427211	672.9033781	239.7593262
987	1523.669859	500	2011	1448.126744	107	0.644617302	140.6545033	MAGPHPRIVITGPHEE	Kd	1619.287586	393.9815845	4.110059074	0.009263328	HPRIVITGPH	5	full	6458.189236	calibration2.csv	0.000617556	0.000150255	0.5	1.619287586	0.393981585	3.303412071	-0.301029996	0.443321254	3.376551626	0.859890539	0.176117236	0.356305725	-0.308742607	0.345608424	-1.114312361	0.340778035	0.442178645	0.294427211	672.9033781	239.7593262
988	241.8527754	63	531.5	236.5077747	89	0.592400989	25.21181349	MAGPHPRIVITGPHEE	Kd	1619.287586	393.9815845	4.110059074	0.009263328	HPRIVITGPH	5	full	6458.189236	calibration2.csv	0.000617556	0.000150255	0.063	1.619287586	0.393981585	2.725503269	-1.200659451	0.443321254	3.376551626	0.859890539	0.176117236	0.356305725	-0.308742607	0.345608424	-1.114312361	0.340778035	0.442178645	0.294427211	672.9033781	239.7593262
989	3903.768156	1000	3790.75	2470.201859	82	0.631846965	274.4668732	MAGPHPLIVITGPHEE	Kd	654.3475376	86.84718863	7.534470003	0.000652195	HPLIVITGPH	6	full	6458.189236	calibration2.csv	0.00152824	0.000202833	1	0.654347538	0.086847189	3.578725144	0	0.463448355	3.552638993	0.939523362	-0.361201818	0.292184334	-0.84606166	0.279039599	-1.651631414	0.273034035	-0.095140408	0.212380078	271.9175225	79.45004023
990	1035.832688	125	1560.5	590.4067024	89	0.411852463	62.93756595	MAGPHPLIVITGPHEE	Kd	654.3475376	86.84718863	7.534470003	0.000652195	HPLIVITGPH	6	full	6458.189236	calibration2.csv	0.00152824	0.000202833	0.125	0.654347538	0.086847189	3.193263773	-0.903089987	0.463448355	3.552638993	0.939523362	-0.361201818	0.292184334	-0.84606166	0.279039599	-1.651631414	0.273034035	-0.095140408	0.212380078	271.9175225	79.45004023
991	4866.121821	2000	4227	3984.434589	67	0.787481799	490.4499943	MAGPHPLIVITGPHEE	Kd	654.3475376	86.84718863	7.534470003	0.000652195	HPLIVITGPH	6	full	6458.189236	calibration2.csv	0.00152824	0.000202833	2	0.654347538	0.086847189	3.626032248	0.301029996	0.463448355	3.552638993	0.939523362	-0.361201818	0.292184334	-0.84606166	0.279039599	-1.651631414	0.273034035	-0.095140408	0.212380078	271.9175225	79.45004023
992	1785.317305	250	1893.5	854.8096458	84	0.482343131	93.8275482	MAGPHPLIVITGPHEE	Kd	654.3475376	86.84718863	7.534470003	0.000652195	HPLIVITGPH	6	full	6458.189236	calibration2.csv	0.00152824	0.000202833	0.25	0.654347538	0.086847189	3.277265309	-0.602059991	0.463448355	3.552638993	0.939523362	-0.361201818	0.292184334	-0.84606166	0.279039599	-1.651631414	0.273034035	-0.095140408	0.212380078	271.9175225	79.45004023
993	2797.333137	500	2928.75	1564.256141	56	0.49934072	210.924255	MAGPHPLIVITGPHEE	Kd	654.3475376	86.84718863	7.534470003	0.000652195	HPLIVITGPH	6	full	6458.189236	calibration2.csv	0.00152824	0.000202833	0.5	0.654347538	0.086847189	3.466682302	-0.301029996	0.463448355	3.552638993	0.939523362	-0.361201818	0.292184334	-0.84606166	0.279039599	-1.651631414	0.273034035	-0.095140408	0.212380078	271.9175225	79.45004023
994	567.1810392	63	831.5	359.852272	65	0.531455005	44.98153399	MAGPHPLIVITGPHEE	Kd	654.3475376	86.84718863	7.534470003	0.000652195	HPLIVITGPH	6	full	6458.189236	calibration2.csv	0.00152824	0.000202833	0.063	0.654347538	0.086847189	2.919862254	-1.200659451	0.463448355	3.552638993	0.939523362	-0.361201818	0.292184334	-0.84606166	0.279039599	-1.651631414	0.273034035	-0.095140408	0.212380078	271.9175225	79.45004023
995	3905.110712	1000	3894.5	2565.81292	93	0.599580133	267.5044888	MAGPHPLIVITGPHEE	Kd	653.7787819	152.0121628	4.300832051	0.00770936	HPLIVITGPH	7	full	6458.189236	calibration2.csv	0.001529569	0.000355645	1	0.653778782	0.152012163	3.590451708	0	0.390507861	3.536086568	0.855579618	-0.361201818	0.292184334	-0.84606166	0.279039599	-1.651631414	0.273034035	-0.095140408	0.212380078	271.9175225	79.45004023
996	1036.589174	125	1810.25	717.3403149	84	0.414901684	78.73832883	MAGPHPLIVITGPHEE	Kd	653.7787819	152.0121628	4.300832051	0.00770936	HPLIVITGPH	7	full	6458.189236	calibration2.csv	0.001529569	0.000355645	0.125	0.653778782	0.152012163	3.257738556	-0.903089987	0.390507861	3.536086568	0.855579618	-0.361201818	0.292184334	-0.84606166	0.279039599	-1.651631414	0.273034035	-0.095140408	0.212380078	271.9175225	79.45004023
997	4867.164724	2000	3602.5	3960.914808	65	0.811534949	495.114351	MAGPHPLIVITGPHEE	Kd	653.7787819	152.0121628	4.300832051	0.00770936	HPLIVITGPH	7	full	6458.189236	calibration2.csv	0.001529569	0.000355645	2	0.653778782	0.152012163	3.556603989	0.301029996	0.390507861	3.536086568	0.855579618	-0.361201818	0.292184334	-0.84606166	0.279039599	-1.651631414	0.273034035	-0.095140408	0.212380078	271.9175225	79.45004023
998	1786.440821	250	1986	861.3394141	95	0.449480464	88.8403772	MAGPHPLIVITGPHEE	Kd	653.7787819	152.0121628	4.300832051	0.00770936	HPLIVITGPH	7	full	6458.189236	calibration2.csv	0.001529569	0.000355645	0.25	0.653778782	0.152012163	3.297979244	-0.602059991	0.390507861	3.536086568	0.855579618	-0.361201818	0.292184334	-0.84606166	0.279039599	-1.651631414	0.273034035	-0.095140408	0.212380078	271.9175225	79.45004023
999	2798.712083	500	3057.5	2166.059881	55	0.643647143	294.7634144	MAGPHPLIVITGPHEE	Kd	653.7787819	152.0121628	4.300832051	0.00770936	HPLIVITGPH	7	full	6458.189236	calibration2.csv	0.001529569	0.000355645	0.5	0.653778782	0.152012163	3.485366466	-0.301029996	0.390507861	3.536086568	0.855579618	-0.361201818	0.292184334	-0.84606166	0.279039599	-1.651631414	0.273034035	-0.095140408	0.212380078	271.9175225	79.45004023
1000	567.6310908	63	937	372.1971938	86	0.501024601	40.37045383	MAGPHPLIVITGPHEE	Kd	653.7787819	152.0121628	4.300832051	0.00770936	HPLIVITGPH	7	full	6458.189236	calibration2.csv	0.001529569	0.000355645	0.063	0.653778782	0.152012163	2.971739591	-1.200659451	0.390507861	3.536086568	0.855579618	-0.361201818	0.292184334	-0.84606166	0.279039599	-1.651631414	0.273034035	-0.095140408	0.212380078	271.9175225	79.45004023
1001	196.8258061	1000	322	472.5661003	74	1.913380101	55.30967851	MAGPHPVIVIEGPHEE	Kd	31811.69967	11601.83407	2.741954374	0.040697393	HPVIVIEGPH	8	full	6458.189236	calibration2.csv	3.14E-05	1.15E-05	1	31.81169967	11.60183407	2.507855872	0	0.168530481	2.40919043	0.637651381	1.941981008	0.448067795	1.457121165	0.439609101	0.651551411	0.435821807	2.208042417	0.400622467	13219.51725	5923.239944
1002	25.27730363	125	185	46.31042487	93	2.461771656	4.828195553	MAGPHPVIVIEGPHEE	Kd	31811.69967	11601.83407	2.741954374	0.040697393	HPVIVIEGPH	8	full	6458.189236	calibration2.csv	3.14E-05	1.15E-05	0.125	31.81169967	11.60183407	2.267171728	-0.903089987	0.168530481	2.40919043	0.637651381	1.941981008	0.448067795	1.457121165	0.439609101	0.651551411	0.435821807	2.208042417	0.400622467	13219.51725	5923.239944
1003	382.0091448	2000	242.5	602.0714899	78	1.836445183	68.61241405	MAGPHPVIVIEGPHEE	Kd	31811.69967	11601.83407	2.741954374	0.040697393	HPVIVIEGPH	8	full	6458.189236	calibration2.csv	3.14E-05	1.15E-05	2	31.81169967	11.60183407	2.384711743	0.301029996	0.168530481	2.40919043	0.637651381	1.941981008	0.448067795	1.457121165	0.439609101	0.651551411	0.435821807	2.208042417	0.400622467	13219.51725	5923.239944
1004	50.35750836	250	182	53.04192586	80	5.565054516	5.967682902	MAGPHPVIVIEGPHEE	Kd	31811.69967	11601.83407	2.741954374	0.040697393	HPVIVIEGPH	8	full	6458.189236	calibration2.csv	3.14E-05	1.15E-05	0.25	31.81169967	11.60183407	2.260071388	-0.602059991	0.168530481	2.40919043	0.637651381	1.941981008	0.448067795	1.457121165	0.439609101	0.651551411	0.435821807	2.208042417	0.400622467	13219.51725	5923.239944
1005	99.93577099	500	240.25	385.5710682	82	6.02569613	42.8412298	MAGPHPVIVIEGPHEE	Kd	31811.69967	11601.83407	2.741954374	0.040697393	HPVIVIEGPH	8	full	6458.189236	calibration2.csv	3.14E-05	1.15E-05	0.5	31.81169967	11.60183407	2.380663396	-0.301029996	0.168530481	2.40919043	0.637651381	1.941981008	0.448067795	1.457121165	0.439609101	0.651551411	0.435821807	2.208042417	0.400622467	13219.51725	5923.239944
1006	12.76454135	63	158	308.2390479	74	-5.270260985	36.07665177	MAGPHPVIVIEGPHEE	Kd	31811.69967	11601.83407	2.741954374	0.040697393	HPVIVIEGPH	8	full	6458.189236	calibration2.csv	3.14E-05	1.15E-05	0.063	31.81169967	11.60183407	2.198657087	-1.200659451	0.168530481	2.40919043	0.637651381	1.941981008	0.448067795	1.457121165	0.439609101	0.651551411	0.435821807	2.208042417	0.400622467	13219.51725	5923.239944
1007	209.0369211	1000	322.25	334.049627	100	1.442573908	33.57325073	MAGPHPVIVIEGPHEE	Kd	29894.96918	10732.36635	2.785496527	0.03865004	HPVIVIEGPH	9	full	6458.189236	calibration2.csv	3.35E-05	1.20E-05	1	29.89496918	10.73236635	2.508192926	0	0.184029066	2.436678931	0.672743742	1.941981008	0.448067795	1.457121165	0.439609101	0.651551411	0.435821807	2.208042417	0.400622467	13219.51725	5923.239944
1008	26.89122196	125	192.75	89.64221039	96	2.990669747	9.19709673	MAGPHPVIVIEGPHEE	Kd	29894.96918	10732.36635	2.785496527	0.03865004	HPVIVIEGPH	9	full	6458.189236	calibration2.csv	3.35E-05	1.20E-05	0.125	29.89496918	10.73236635	2.284994387	-0.903089987	0.184029066	2.436678931	0.672743742	1.941981008	0.448067795	1.457121165	0.439609101	0.651551411	0.435821807	2.208042417	0.400622467	13219.51725	5923.239944
1009	404.966012	2000	262	676.6548109	67	1.600023728	83.29044955	MAGPHPVIVIEGPHEE	Kd	29894.96918	10732.36635	2.785496527	0.03865004	HPVIVIEGPH	9	full	6458.189236	calibration2.csv	3.35E-05	1.20E-05	2	29.89496918	10.73236635	2.418301291	0.301029996	0.184029066	2.436678931	0.672743742	1.941981008	0.448067795	1.457121165	0.439609101	0.651551411	0.435821807	2.208042417	0.400622467	13219.51725	5923.239944
1010	53.55942808	250	183.5	178.2556354	101	10.1773992	17.82556354	MAGPHPVIVIEGPHEE	Kd	29894.96918	10732.36635	2.785496527	0.03865004	HPVIVIEGPH	9	full	6458.189236	calibration2.csv	3.35E-05	1.20E-05	0.25	29.89496918	10.73236635	2.263636069	-0.602059991	0.184029066	2.436678931	0.672743742	1.941981008	0.448067795	1.457121165	0.439609101	0.651551411	0.435821807	2.208042417	0.400622467	13219.51725	5923.239944
1011	106.2377987	500	279	212.7134225	76	1.453470003	24.56203035	MAGPHPVIVIEGPHEE	Kd	29894.96918	10732.36635	2.785496527	0.03865004	HPVIVIEGPH	9	full	6458.189236	calibration2.csv	3.35E-05	1.20E-05	0.5	29.89496918	10.73236635	2.445604203	-0.301029996	0.184029066	2.436678931	0.672743742	1.941981008	0.448067795	1.457121165	0.439609101	0.651551411	0.435821807	2.208042417	0.400622467	13219.51725	5923.239944
1012	13.58122506	63	159	70.91210935	82	-8.952722043	7.879123262	MAGPHPVIVIEGPHEE	Kd	29894.96918	10732.36635	2.785496527	0.03865004	HPVIVIEGPH	9	full	6458.189236	calibration2.csv	3.35E-05	1.20E-05	0.063	29.89496918	10.73236635	2.201397124	-1.200659451	0.184029066	2.436678931	0.672743742	1.941981008	0.448067795	1.457121165	0.439609101	0.651551411	0.435821807	2.208042417	0.400622467	13219.51725	5923.239944
1013	2363.14763	1000	2421.75	1548.659602	102	0.609941576	154.0973899	MAGPHPRIVITGPHEE	Kd	1732.875913	405.0766073	4.277896778	0.007879269	HPRIVITGPH	10	full	6458.189236	calibration2.csv	0.000577075	0.000134897	1	1.732875913	0.405076607	3.384129308	0	0.40607622	3.359140985	0.88426371	0.176117236	0.356305725	-0.308742607	0.345608424	-1.114312361	0.340778035	0.442178645	0.294427211	672.9033781	239.7593262
1014	434.5143014	125	1258.25	646.4517075	104	0.553471206	63.69677943	MAGPHPRIVITGPHEE	Kd	1732.875913	405.0766073	4.277896778	0.007879269	HPRIVITGPH	10	full	6458.189236	calibration2.csv	0.000577075	0.000134897	0.125	1.732875913	0.405076607	3.099766939	-0.903089987	0.40607622	3.359140985	0.88426371	0.176117236	0.356305725	-0.308742607	0.345608424	-1.114312361	0.340778035	0.442178645	0.294427211	672.9033781	239.7593262
1015	3460.168185	2000	2651	4494.865259	82	0.974486227	499.4294732	MAGPHPRIVITGPHEE	Kd	1732.875913	405.0766073	4.277896778	0.007879269	HPRIVITGPH	10	full	6458.189236	calibration2.csv	0.000577075	0.000134897	2	1.732875913	0.405076607	3.423409728	0.301029996	0.40607622	3.359140985	0.88426371	0.176117236	0.356305725	-0.308742607	0.345608424	-1.114312361	0.340778035	0.442178645	0.294427211	672.9033781	239.7593262
1016	814.2452578	250	1277	585.604212	91	0.492054397	61.72810391	MAGPHPRIVITGPHEE	Kd	1732.875913	405.0766073	4.277896778	0.007879269	HPRIVITGPH	10	full	6458.189236	calibration2.csv	0.000577075	0.000134897	0.25	1.732875913	0.405076607	3.106190897	-0.602059991	0.40607622	3.359140985	0.88426371	0.176117236	0.356305725	-0.308742607	0.345608424	-1.114312361	0.340778035	0.442178645	0.294427211	672.9033781	239.7593262
1017	1446.159457	500	1864	1273.193633	91	0.616992063	134.2063928	MAGPHPRIVITGPHEE	Kd	1732.875913	405.0766073	4.277896778	0.007879269	HPRIVITGPH	10	full	6458.189236	calibration2.csv	0.000577075	0.000134897	0.5	1.732875913	0.405076607	3.270445908	-0.301029996	0.40607622	3.359140985	0.88426371	0.176117236	0.356305725	-0.308742607	0.345608424	-1.114312361	0.340778035	0.442178645	0.294427211	672.9033781	239.7593262
1018	226.5556985	63	591.75	214.5560875	104	0.538428741	21.14083949	MAGPHPRIVITGPHEE	Kd	1732.875913	405.0766073	4.277896778	0.007879269	HPRIVITGPH	10	full	6458.189236	calibration2.csv	0.000577075	0.000134897	0.063	1.732875913	0.405076607	2.772138267	-1.200659451	0.40607622	3.359140985	0.88426371	0.176117236	0.356305725	-0.308742607	0.345608424	-1.114312361	0.340778035	0.442178645	0.294427211	672.9033781	239.7593262
1019	452.3594183	1000	695	457.1485928	77	0.743221182	52.43853995	MAGPHPVIVLTGPHEE	Kd	13276.67685	3664.838836	3.622717791	0.015176138	HPVIVLTGPH	11	full	6458.189236	calibration2.csv	7.53E-05	2.08E-05	1	13.27667685	3.664838836	2.841984805	0	0.371100204	2.744444327	0.859537363	1.423802628	0.37941006	0.938942785	0.369382467	0.133373031	0.364866952	1.689864038	0.322002494	5517.192116	2093.278193
1020	60.23676465	125	263.5	110.5646527	104	0.994097336	10.89425895	MAGPHPVIVLTGPHEE	Kd	13276.67685	3664.838836	3.622717791	0.015176138	HPVIVLTGPH	11	full	6458.189236	calibration2.csv	7.53E-05	2.08E-05	0.125	13.27667685	3.664838836	2.42078062	-0.903089987	0.371100204	2.744444327	0.859537363	1.423802628	0.37941006	0.938942785	0.369382467	0.133373031	0.364866952	1.689864038	0.322002494	5517.192116	2093.278193
1021	845.4966088	2000	574.25	933.1825141	70	1.302560863	112.341973	MAGPHPVIVLTGPHEE	Kd	13276.67685	3664.838836	3.622717791	0.015176138	HPVIVLTGPH	11	full	6458.189236	calibration2.csv	7.53E-05	2.08E-05	2	13.27667685	3.664838836	2.759101004	0.301029996	0.371100204	2.744444327	0.859537363	1.423802628	0.37941006	0.938942785	0.369382467	0.133373031	0.364866952	1.689864038	0.322002494	5517.192116	2093.278193
1022	119.3602336	250	289.5	171.5235273	73	1.109299446	20.21424155	MAGPHPVIVLTGPHEE	Kd	13276.67685	3664.838836	3.622717791	0.015176138	HPVIVLTGPH	11	full	6458.189236	calibration2.csv	7.53E-05	2.08E-05	0.25	13.27667685	3.664838836	2.461648568	-0.602059991	0.371100204	2.744444327	0.859537363	1.423802628	0.37941006	0.938942785	0.369382467	0.133373031	0.364866952	1.689864038	0.322002494	5517.192116	2093.278193
1023	234.3884997	500	501.5	400.8378271	77	1.050456493	45.97925214	MAGPHPVIVLTGPHEE	Kd	13276.67685	3664.838836	3.622717791	0.015176138	HPVIVLTGPH	11	full	6458.189236	calibration2.csv	7.53E-05	2.08E-05	0.5	13.27667685	3.664838836	2.700270937	-0.301029996	0.371100204	2.744444327	0.859537363	1.423802628	0.37941006	0.938942785	0.369382467	0.133373031	0.364866952	1.689864038	0.322002494	5517.192116	2093.278193
1024	30.50043313	63	190	25.94423867	70	1.62079135	3.123319306	MAGPHPVIVLTGPHEE	Kd	13276.67685	3664.838836	3.622717791	0.015176138	HPVIVLTGPH	11	full	6458.189236	calibration2.csv	7.53E-05	2.08E-05	0.063	13.27667685	3.664838836	2.278753601	-1.200659451	0.371100204	2.744444327	0.859537363	1.423802628	0.37941006	0.938942785	0.369382467	0.133373031	0.364866952	1.689864038	0.322002494	5517.192116	2093.278193
1025	502.9431375	1000	733.5	861.3096192	131	1.473371943	75.54185086	MAGPHPVIVLTGPHEE	Kd	11840.79403	2937.79126	4.03050897	0.010016157	HPVIVLTGPH	12	full	6458.189236	calibration2.csv	8.45E-05	2.10E-05	1	11.84079403	2.93779126	2.865400118	0	0.420880001	2.783176641	0.89862705	1.423802628	0.37941006	0.938942785	0.369382467	0.133373031	0.364866952	1.689864038	0.322002494	5517.192116	2093.278193
1026	67.4651137	125	254.5	369.2795036	152	2.786738385	30.05153981	MAGPHPVIVLTGPHEE	Kd	11840.79403	2937.79126	4.03050897	0.010016157	HPVIVLTGPH	12	full	6458.189236	calibration2.csv	8.45E-05	2.10E-05	0.125	11.84079403	2.93779126	2.405687787	-0.903089987	0.420880001	2.783176641	0.89862705	1.423802628	0.37941006	0.938942785	0.369382467	0.133373031	0.364866952	1.689864038	0.322002494	5517.192116	2093.278193
1027	933.2108005	2000	662.5	3715.741025	90	3.561583805	393.8677609	MAGPHPVIVLTGPHEE	Kd	11840.79403	2937.79126	4.03050897	0.010016157	HPVIVLTGPH	12	full	6458.189236	calibration2.csv	8.45E-05	2.10E-05	2	11.84079403	2.93779126	2.821185883	0.301029996	0.420880001	2.783176641	0.89862705	1.423802628	0.37941006	0.938942785	0.369382467	0.133373031	0.364866952	1.689864038	0.322002494	5517.192116	2093.278193
1028	133.5352588	250	294	535.6083364	93	2.582181659	55.84102922	MAGPHPVIVLTGPHEE	Kd	11840.79403	2937.79126	4.03050897	0.010016157	HPVIVLTGPH	12	full	6458.189236	calibration2.csv	8.45E-05	2.10E-05	0.25	11.84079403	2.93779126	2.46834733	-0.602059991	0.420880001	2.783176641	0.89862705	1.423802628	0.37941006	0.938942785	0.369382467	0.133373031	0.364866952	1.689864038	0.322002494	5517.192116	2093.278193
1029	261.6601988	500	543	512.180224	100	1.262071642	51.47604934	MAGPHPVIVLTGPHEE	Kd	11840.79403	2937.79126	4.03050897	0.010016157	HPVIVLTGPH	12	full	6458.189236	calibration2.csv	8.45E-05	2.10E-05	0.5	11.84079403	2.93779126	2.73479983	-0.301029996	0.420880001	2.783176641	0.89862705	1.423802628	0.37941006	0.938942785	0.369382467	0.133373031	0.364866952	1.689864038	0.322002494	5517.192116	2093.278193
1030	34.17951629	63	184	313.6556513	101	5.35846089	31.36556513	MAGPHPVIVLTGPHEE	Kd	11840.79403	2937.79126	4.03050897	0.010016157	HPVIVLTGPH	12	full	6458.189236	calibration2.csv	8.45E-05	2.10E-05	0.063	11.84079403	2.93779126	2.264817823	-1.200659451	0.420880001	2.783176641	0.89862705	1.423802628	0.37941006	0.938942785	0.369382467	0.133373031	0.364866952	1.689864038	0.322002494	5517.192116	2093.278193
1031	5772.112517	1000	6124.5	4035.725244	151	0.569954781	329.5155863	MAGPIPVIVITGPHEE	Kd	118.8605933	10.85493273	10.94991524	0.00011046	IPVIVITGPH	13	full	6458.189236	calibration2.csv	0.008413217	0.000768336	1	0.118860593	0.010854933	3.787070639	0	0.268204266	3.7528351	0.904369636	-1.372674382	0.275855831	-1.857534225	0.261892826	-2.663103979	0.255484517	-1.106612972	0.189288278	49.39313773	13.62538508
1032	3310.389938	125	3423.25	2709.517962	78	0.667488045	308.7782289	MAGPIPVIVITGPHEE	Kd	118.8605933	10.85493273	10.94991524	0.00011046	IPVIVITGPH	13	full	6458.189236	calibration2.csv	0.008413217	0.000768336	0.125	0.118860593	0.010854933	3.534438617	-0.903089987	0.268204266	3.7528351	0.904369636	-1.372674382	0.275855831	-1.857534225	0.261892826	-2.663103979	0.255484517	-1.106612972	0.189288278	49.39313773	13.62538508
1033	6095.907637	2000	5933.5	9123.82726	103	0.93206791	903.3935144	MAGPIPVIVITGPHEE	Kd	118.8605933	10.85493273	10.94991524	0.00011046	IPVIVITGPH	13	full	6458.189236	calibration2.csv	0.008413217	0.000768336	2	0.118860593	0.010854933	3.773310947	0.301029996	0.268204266	3.7528351	0.904369636	-1.372674382	0.275855831	-1.857534225	0.261892826	-2.663103979	0.255484517	-1.106612972	0.189288278	49.39313773	13.62538508
1034	4377.12062	250	3996.25	1428.482114	98	0.346874029	145.0403837	MAGPIPVIVITGPHEE	Kd	118.8605933	10.85493273	10.94991524	0.00011046	IPVIVITGPH	13	full	6458.189236	calibration2.csv	0.008413217	0.000768336	0.25	0.118860593	0.010854933	3.601652649	-0.602059991	0.268204266	3.7528351	0.904369636	-1.372674382	0.275855831	-1.857534225	0.261892826	-2.663103979	0.255484517	-1.106612972	0.189288278	49.39313773	13.62538508
1035	5217.806163	500	5155.5	3760.632673	88	0.612850652	403.1821427	MAGPIPVIVITGPHEE	Kd	118.8605933	10.85493273	10.94991524	0.00011046	IPVIVITGPH	13	full	6458.189236	calibration2.csv	0.008413217	0.000768336	0.5	0.118860593	0.010854933	3.712270791	-0.301029996	0.268204266	3.7528351	0.904369636	-1.372674382	0.275855831	-1.857534225	0.261892826	-2.663103979	0.255484517	-1.106612972	0.189288278	49.39313773	13.62538508
1036	2237.240704	63	2413	784.5366087	79	0.355330771	88.83127845	MAGPIPVIVITGPHEE	Kd	118.8605933	10.85493273	10.94991524	0.00011046	IPVIVITGPH	13	full	6458.189236	calibration2.csv	0.008413217	0.000768336	0.063	0.118860593	0.010854933	3.382557322	-1.200659451	0.268204266	3.7528351	0.904369636	-1.372674382	0.275855831	-1.857534225	0.261892826	-2.663103979	0.255484517	-1.106612972	0.189288278	49.39313773	13.62538508
1037	5841.946957	1000	5943	4993.698057	125	0.686301999	448.4473239	MAGPIPVIVITGPHEE	Kd	105.4857711	11.68420922	9.028062501	0.00027853	IPVIVITGPH	14	full	6458.189236	calibration2.csv	0.009479952	0.001050054	1	0.105485771	0.011684209	3.77400573	0	0.248405303	3.753522274	0.803149604	-1.372674382	0.275855831	-1.857534225	0.261892826	-2.663103979	0.255484517	-1.106612972	0.189288278	49.39313773	13.62538508
1038	3502.488031	125	3874	1889.776299	81	0.459394575	211.2834133	MAGPIPVIVITGPHEE	Kd	105.4857711	11.68420922	9.028062501	0.00027853	IPVIVITGPH	14	full	6458.189236	calibration2.csv	0.009479952	0.001050054	0.125	0.105485771	0.011684209	3.588159616	-0.903089987	0.248405303	3.753522274	0.803149604	-1.372674382	0.275855831	-1.857534225	0.261892826	-2.663103979	0.255484517	-1.106612972	0.189288278	49.39313773	13.62538508
1039	6134.63109	2000	5777.5	7788.517116	96	0.891870253	799.0849956	MAGPIPVIVITGPHEE	Kd	105.4857711	11.68420922	9.028062501	0.00027853	IPVIVITGPH	14	full	6458.189236	calibration2.csv	0.009479952	0.001050054	2	0.105485771	0.011684209	3.761739954	0.301029996	0.248405303	3.753522274	0.803149604	-1.372674382	0.275855831	-1.857534225	0.261892826	-2.663103979	0.255484517	-1.106612972	0.189288278	49.39313773	13.62538508
1040	4541.805721	250	4101.5	3225.052406	104	0.679285668	317.7738559	MAGPIPVIVITGPHEE	Kd	105.4857711	11.68420922	9.028062501	0.00027853	IPVIVITGPH	14	full	6458.189236	calibration2.csv	0.009479952	0.001050054	0.25	0.105485771	0.011684209	3.612942716	-0.602059991	0.248405303	3.753522274	0.803149604	-1.372674382	0.275855831	-1.857534225	0.261892826	-2.663103979	0.255484517	-1.106612972	0.189288278	49.39313773	13.62538508
1041	5333.064412	500	5458	3983.619546	101	0.619861951	398.3619546	MAGPIPVIVITGPHEE	Kd	105.4857711	11.68420922	9.028062501	0.00027853	IPVIVITGPH	14	full	6458.189236	calibration2.csv	0.009479952	0.001050054	0.5	0.105485771	0.011684209	3.737033531	-0.301029996	0.248405303	3.753522274	0.803149604	-1.372674382	0.275855831	-1.857534225	0.261892826	-2.663103979	0.255484517	-1.106612972	0.189288278	49.39313773	13.62538508
1042	2414.838471	63	2372	699.9753814	90	0.311205441	74.19724204	MAGPIPVIVITGPHEE	Kd	105.4857711	11.68420922	9.028062501	0.00027853	IPVIVITGPH	14	full	6458.189236	calibration2.csv	0.009479952	0.001050054	0.063	0.105485771	0.011684209	3.375114685	-1.200659451	0.248405303	3.753522274	0.803149604	-1.372674382	0.275855831	-1.857534225	0.261892826	-2.663103979	0.255484517	-1.106612972	0.189288278	49.39313773	13.62538508
1043	402.7370984	1000	496.25	475.248756	86	1.326411898	51.54796511	MAGPHPVIVITGLHEE	Kd	15035.74456	2953.591872	5.090664254	0.003800007	HPVIVITGLH	15	full	6458.189236	calibration2.csv	6.65E-05	1.31E-05	1	15.03574456	2.953591872	2.69570052	0	0.385890313	2.675753334	0.971084351	1.497584555	0.326104425	1.012724712	0.314381152	0.207154958	0.309063092	1.763645965	0.257055847	6248.181851	2037.559752
1044	53.24762587	125	210	53.17169608	89	1.445191923	5.668121847	MAGPHPVIVITGLHEE	Kd	15035.74456	2953.591872	5.090664254	0.003800007	HPVIVITGLH	15	full	6458.189236	calibration2.csv	6.65E-05	1.31E-05	0.125	15.03574456	2.953591872	2.322219295	-0.903089987	0.385890313	2.675753334	0.971084351	1.497584555	0.326104425	1.012724712	0.314381152	0.207154958	0.309063092	1.763645965	0.257055847	6248.181851	2037.559752
1045	758.1927765	2000	613.75	517.1269162	80	1.043751975	58.18132367	MAGPHPVIVITGLHEE	Kd	15035.74456	2953.591872	5.090664254	0.003800007	HPVIVITGLH	15	full	6458.189236	calibration2.csv	6.65E-05	1.31E-05	2	15.03574456	2.953591872	2.787991505	0.301029996	0.385890313	2.675753334	0.971084351	1.497584555	0.326104425	1.012724712	0.314381152	0.207154958	0.309063092	1.763645965	0.257055847	6248.181851	2037.559752
1046	105.6243811	250	240.75	62.61016228	78	1.062921462	7.135090186	MAGPHPVIVITGLHEE	Kd	15035.74456	2953.591872	5.090664254	0.003800007	HPVIVITGLH	15	full	6458.189236	calibration2.csv	6.65E-05	1.31E-05	0.25	15.03574456	2.953591872	2.381566296	-0.602059991	0.385890313	2.675753334	0.971084351	1.497584555	0.326104425	1.012724712	0.314381152	0.207154958	0.309063092	1.763645965	0.257055847	6248.181851	2037.559752
1047	207.8493634	500	382.25	623.2264972	74	4.794299163	72.9431442	MAGPHPVIVITGLHEE	Kd	15035.74456	2953.591872	5.090664254	0.003800007	HPVIVITGLH	15	full	6458.189236	calibration2.csv	6.65E-05	1.31E-05	0.5	15.03574456	2.953591872	2.582347494	-0.301029996	0.385890313	2.675753334	0.971084351	1.497584555	0.326104425	1.012724712	0.314381152	0.207154958	0.309063092	1.763645965	0.257055847	6248.181851	2037.559752
1048	26.94700345	63	174	16.91136662	90	-21.4369436	1.792601277	MAGPHPVIVITGLHEE	Kd	15035.74456	2953.591872	5.090664254	0.003800007	HPVIVITGLH	15	full	6458.189236	calibration2.csv	6.65E-05	1.31E-05	0.063	15.03574456	2.953591872	2.240549248	-1.200659451	0.385890313	2.675753334	0.971084351	1.497584555	0.326104425	1.012724712	0.314381152	0.207154958	0.309063092	1.763645965	0.257055847	6248.181851	2037.559752
1049	1277.215368	1000	1337	736.7392279	83	0.556300232	81.35923726	MAGPHPVIVITMPHEE	Kd	4056.460641	573.7146227	7.070519873	0.000875388	HPVIVITMPH	16	full	6458.189236	calibration2.csv	0.00024652	3.49E-05	1	4.056460641	0.573714623	3.126131407	0	0.555975468	3.131316376	0.979749564	0.720683687	0.296241963	0.235823845	0.283285569	-0.56974591	0.277371952	0.986745097	0.217928689	1685.683317	499.3701355
1050	193.0602064	125	463.5	200.1440406	87	0.589985313	21.58208694	MAGPHPVIVITMPHEE	Kd	4056.460641	573.7146227	7.070519873	0.000875388	HPVIVITMPH	16	full	6458.189236	calibration2.csv	0.00024652	3.49E-05	0.125	4.056460641	0.573714623	2.666049738	-0.903089987	0.555975468	3.131316376	0.979749564	0.720683687	0.296241963	0.235823845	0.283285569	-0.56974591	0.277371952	0.986745097	0.217928689	1685.683317	499.3701355
1051	2132.661176	2000	1834	1345.816532	89	0.666086492	143.4645243	MAGPHPVIVITMPHEE	Kd	4056.460641	573.7146227	7.070519873	0.000875388	HPVIVITMPH	16	full	6458.189236	calibration2.csv	0.00024652	3.49E-05	2	4.056460641	0.573714623	3.263399331	0.301029996	0.555975468	3.131316376	0.979749564	0.720683687	0.296241963	0.235823845	0.283285569	-0.56974591	0.277371952	0.986745097	0.217928689	1685.683317	499.3701355
1052	374.9128214	250	624.5	205.1806136	81	0.437341413	22.93988999	MAGPHPVIVITMPHEE	Kd	4056.460641	573.7146227	7.070519873	0.000875388	HPVIVITMPH	16	full	6458.189236	calibration2.csv	0.00024652	3.49E-05	0.25	4.056460641	0.573714623	2.795532443	-0.602059991	0.555975468	3.131316376	0.979749564	0.720683687	0.296241963	0.235823845	0.283285569	-0.56974591	0.277371952	0.986745097	0.217928689	1685.683317	499.3701355
1053	708.6848483	500	1043	395.9167521	76	0.450400383	45.71652868	MAGPHPVIVITMPHEE	Kd	4056.460641	573.7146227	7.070519873	0.000875388	HPVIVITMPH	16	full	6458.189236	calibration2.csv	0.00024652	3.49E-05	0.5	4.056460641	0.573714623	3.018284308	-0.301029996	0.555975468	3.131316376	0.979749564	0.720683687	0.296241963	0.235823845	0.283285569	-0.56974591	0.277371952	0.986745097	0.217928689	1685.683317	499.3701355
1054	98.76679432	63	259.5	58.14566664	87	0.665833892	6.270008484	MAGPHPVIVITMPHEE	Kd	4056.460641	573.7146227	7.070519873	0.000875388	HPVIVITMPH	16	full	6458.189236	calibration2.csv	0.00024652	3.49E-05	0.063	4.056460641	0.573714623	2.414137362	-1.200659451	0.555975468	3.131316376	0.979749564	0.720683687	0.296241963	0.235823845	0.283285569	-0.56974591	0.277371952	0.986745097	0.217928689	1685.683317	499.3701355
1055	1000.686597	1000	1249	1212.095951	125	1.1097544	108.8494297	MAGPHPVIVITMPHEE	Kd	5453.758105	1170.181941	4.660606966	0.005529073	HPVIVITMPH	17	full	6458.189236	calibration2.csv	0.00018336	3.93E-05	1	5.453758105	1.170181941	3.096562438	0	0.484792758	3.05185609	0.935531256	0.720683687	0.296241963	0.235823845	0.283285569	-0.56974591	0.277371952	0.986745097	0.217928689	1685.683317	499.3701355
1056	144.7049037	125	456	402.2607574	101	1.43168428	40.22607574	MAGPHPVIVITMPHEE	Kd	5453.758105	1170.181941	4.660606966	0.005529073	HPVIVITMPH	17	full	6458.189236	calibration2.csv	0.00018336	3.93E-05	0.125	5.453758105	1.170181941	2.658964843	-0.903089987	0.484792758	3.05185609	0.935531256	0.720683687	0.296241963	0.235823845	0.283285569	-0.56974591	0.277371952	0.986745097	0.217928689	1685.683317	499.3701355
1057	1732.867943	2000	1304.75	1368.100143	94	0.876491167	141.8653762	MAGPHPVIVITMPHEE	Kd	5453.758105	1170.181941	4.660606966	0.005529073	HPVIVITMPH	17	full	6458.189236	calibration2.csv	0.00018336	3.93E-05	2	5.453758105	1.170181941	3.115527306	0.301029996	0.484792758	3.05185609	0.935531256	0.720683687	0.296241963	0.235823845	0.283285569	-0.56974591	0.277371952	0.986745097	0.217928689	1685.683317	499.3701355
1058	283.0672829	250	561.75	183.8582215	94	0.447332026	19.06520944	MAGPHPVIVITMPHEE	Kd	5453.758105	1170.181941	4.660606966	0.005529073	HPVIVITMPH	17	full	6458.189236	calibration2.csv	0.00018336	3.93E-05	0.25	5.453758105	1.170181941	2.749543081	-0.602059991	0.484792758	3.05185609	0.935531256	0.720683687	0.296241963	0.235823845	0.283285569	-0.56974591	0.277371952	0.986745097	0.217928689	1685.683317	499.3701355
1059	542.3624139	500	945.5	518.5925995	78	0.593830114	59.09911158	MAGPHPVIVITMPHEE	Kd	5453.758105	1170.181941	4.660606966	0.005529073	HPVIVITMPH	17	full	6458.189236	calibration2.csv	0.00018336	3.93E-05	0.5	5.453758105	1.170181941	2.975661533	-0.301029996	0.484792758	3.05185609	0.935531256	0.720683687	0.296241963	0.235823845	0.283285569	-0.56974591	0.277371952	0.986745097	0.217928689	1685.683317	499.3701355
1060	73.75090843	63	253	85.47515194	125	0.998774853	7.67589524	MAGPHPVIVITMPHEE	Kd	5453.758105	1170.181941	4.660606966	0.005529073	HPVIVITMPH	17	full	6458.189236	calibration2.csv	0.00018336	3.93E-05	0.063	5.453758105	1.170181941	2.403120521	-1.200659451	0.484792758	3.05185609	0.935531256	0.720683687	0.296241963	0.235823845	0.283285569	-0.56974591	0.277371952	0.986745097	0.217928689	1685.683317	499.3701355
1061	1733.535263	1000	2041	2657.292216	111	0.956305223	253.3628717	MAGPHPKIVITGPHEE	Kd	2725.444399	668.9709388	4.074084898	0.009595388	HPKIVITGPH	18	full	6458.189236	calibration2.csv	0.000366913	9.01E-05	1	2.725444399	0.668970939	3.309843005	0	0.515529781	3.256249464	0.854576699	0.484859843	0.357776208	0	0.347124225	-0.805569754	0.342315226	0.750921252	0.296205042	1132.572595	405.2075278
1062	283.2097531	125	748.25	484.9268053	100	0.720657466	48.73697769	MAGPHPKIVITGPHEE	Kd	2725.444399	668.9709388	4.074084898	0.009595388	HPKIVITGPH	18	full	6458.189236	calibration2.csv	0.000366913	9.01E-05	0.125	2.725444399	0.668970939	2.874046726	-0.903089987	0.515529781	3.256249464	0.854576699	0.484859843	0.357776208	0	0.347124225	-0.805569754	0.342315226	0.750921252	0.296205042	1132.572595	405.2075278
1063	2733.367993	2000	1928	3393.749716	103	1.057945255	336.0312943	MAGPHPKIVITGPHEE	Kd	2725.444399	668.9709388	4.074084898	0.009595388	HPKIVITGPH	18	full	6458.189236	calibration2.csv	0.000366913	9.01E-05	2	2.725444399	0.668970939	3.28510703	0.301029996	0.515529781	3.256249464	0.854576699	0.484859843	0.357776208	0	0.347124225	-0.805569754	0.342315226	0.750921252	0.296205042	1132.572595	405.2075278
1064	542.6239219	250	841.75	628.7591312	98	0.791684588	63.84081727	MAGPHPKIVITGPHEE	Kd	2725.444399	668.9709388	4.074084898	0.009595388	HPKIVITGPH	18	full	6458.189236	calibration2.csv	0.000366913	9.01E-05	0.25	2.725444399	0.668970939	2.925183125	-0.602059991	0.515529781	3.256249464	0.854576699	0.484859843	0.357776208	0	0.347124225	-0.805569754	0.342315226	0.750921252	0.296205042	1132.572595	405.2075278
1065	1001.131695	500	1685	960.9027948	75	0.58330569	111.702681	MAGPHPKIVITGPHEE	Kd	2725.444399	668.9709388	4.074084898	0.009595388	HPKIVITGPH	18	full	6458.189236	calibration2.csv	0.000366913	9.01E-05	0.5	2.725444399	0.668970939	3.226599905	-0.301029996	0.515529781	3.256249464	0.854576699	0.484859843	0.357776208	0	0.347124225	-0.805569754	0.342315226	0.750921252	0.296205042	1132.572595	405.2075278
1066	145.9114344	63	332.5	102.0785229	120	0.590518608	9.357522855	MAGPHPKIVITGPHEE	Kd	2725.444399	668.9709388	4.074084898	0.009595388	HPKIVITGPH	18	full	6458.189236	calibration2.csv	0.000366913	9.01E-05	0.063	2.725444399	0.668970939	2.52179165	-1.200659451	0.515529781	3.256249464	0.854576699	0.484859843	0.357776208	0	0.347124225	-0.805569754	0.342315226	0.750921252	0.296205042	1132.572595	405.2075278
1067	1767.698841	1000	2159	1855.374641	123	0.738090956	167.9777273	MAGPHPKIVITGPHEE	Kd	2653.444289	594.4743114	4.463513793	0.006618883	HPKIVITGPH	19	full	6458.189236	calibration2.csv	0.000376869	8.44E-05	1	2.653444289	0.594474311	3.334252642	0	0.522776705	3.261272783	0.900121777	0.484859843	0.357776208	0	0.347124225	-0.805569754	0.342315226	0.750921252	0.296205042	1132.572595	405.2075278
1068	290.5488002	125	701.75	427.6496532	104	0.640424553	42.13757241	MAGPHPKIVITGPHEE	Kd	2653.444289	594.4743114	4.463513793	0.006618883	HPKIVITGPH	19	full	6458.189236	calibration2.csv	0.000376869	8.44E-05	0.125	2.653444289	0.594474311	2.846182421	-0.903089987	0.522776705	3.261272783	0.900121777	0.484859843	0.357776208	0	0.347124225	-0.805569754	0.342315226	0.750921252	0.296205042	1132.572595	405.2075278
1069	2775.659849	2000	1996.5	2993.774671	105	0.993542265	293.563759	MAGPHPKIVITGPHEE	Kd	2653.444289	594.4743114	4.463513793	0.006618883	HPKIVITGPH	19	full	6458.189236	calibration2.csv	0.000376869	8.44E-05	2	2.653444289	0.594474311	3.300269315	0.301029996	0.522776705	3.261272783	0.900121777	0.484859843	0.357776208	0	0.347124225	-0.805569754	0.342315226	0.750921252	0.296205042	1132.572595	405.2075278
1070	556.0800031	250	919.25	446.6159849	112	0.539318591	42.39091331	MAGPHPKIVITGPHEE	Kd	2653.444289	594.4743114	4.463513793	0.006618883	HPKIVITGPH	19	full	6458.189236	calibration2.csv	0.000376869	8.44E-05	0.25	2.653444289	0.594474311	2.963433639	-0.602059991	0.522776705	3.261272783	0.900121777	0.484859843	0.357776208	0	0.347124225	-0.805569754	0.342315226	0.750921252	0.296205042	1132.572595	405.2075278
1071	1023.989747	500	1492.75	1259.193205	100	0.774292517	126.5536788	MAGPHPKIVITGPHEE	Kd	2653.444289	594.4743114	4.463513793	0.006618883	HPKIVITGPH	19	full	6458.189236	calibration2.csv	0.000376869	8.44E-05	0.5	2.653444289	0.594474311	3.17398708	-0.301029996	0.522776705	3.261272783	0.900121777	0.484859843	0.357776208	0	0.347124225	-0.805569754	0.342315226	0.750921252	0.296205042	1132.572595	405.2075278
1072	149.7788574	63	342.75	100.0396549	130	0.548127838	8.808000485	MAGPHPKIVITGPHEE	Kd	2653.444289	594.4743114	4.463513793	0.006618883	HPKIVITGPH	19	full	6458.189236	calibration2.csv	0.000376869	8.44E-05	0.063	2.653444289	0.594474311	2.534977463	-1.200659451	0.522776705	3.261272783	0.900121777	0.484859843	0.357776208	0	0.347124225	-0.805569754	0.342315226	0.750921252	0.296205042	1132.572595	405.2075278
1073	4057.495213	1000	4223.5	2899.924998	106	0.62973721	283.0037017	MAGPHPKIIITGPHEE	Kd	591.6689724	101.0165132	5.857151009	0.002055786	HPKIIITGPH	20	full	6458.189236	calibration2.csv	0.001690134	0.000288559	1	0.591668972	0.101016513	3.625672499	0	0.482729144	3.567793612	0.875477164	-0.42091176	0.311296379	-0.905771603	0.298993058	-1.711341357	0.293396208	-0.154850351	0.237989597	245.8711187	76.53878899
1074	1126.424731	125	1605.75	729.1864033	132	0.486428901	63.70931186	MAGPHPKIIITGPHEE	Kd	591.6689724	101.0165132	5.857151009	0.002055786	HPKIIITGPH	20	full	6458.189236	calibration2.csv	0.001690134	0.000288559	0.125	0.591668972	0.101016513	3.205677931	-0.903089987	0.482729144	3.567793612	0.875477164	-0.42091176	0.311296379	-0.905771603	0.298993058	-1.711341357	0.293396208	-0.154850351	0.237989597	245.8711187	76.53878899
1075	4983.807195	2000	3972.5	5253.166996	89	0.90716918	559.9894834	MAGPHPKIIITGPHEE	Kd	591.6689724	101.0165132	5.857151009	0.002055786	HPKIIITGPH	20	full	6458.189236	calibration2.csv	0.001690134	0.000288559	2	0.591668972	0.101016513	3.599063906	0.301029996	0.482729144	3.567793612	0.875477164	-0.42091176	0.311296379	-0.905771603	0.298993058	-1.711341357	0.293396208	-0.154850351	0.237989597	245.8711187	76.53878899
1076	1918.268775	250	1999.25	747.2811712	122	0.4125916	67.93465193	MAGPHPKIIITGPHEE	Kd	591.6689724	101.0165132	5.857151009	0.002055786	HPKIIITGPH	20	full	6458.189236	calibration2.csv	0.001690134	0.000288559	0.25	0.591668972	0.101016513	3.300867105	-0.602059991	0.482729144	3.567793612	0.875477164	-0.42091176	0.311296379	-0.905771603	0.298993058	-1.711341357	0.293396208	-0.154850351	0.237989597	245.8711187	76.53878899
1077	2957.943021	500	3129	1515.071122	87	0.497739734	163.3743207	MAGPHPKIIITGPHEE	Kd	591.6689724	101.0165132	5.857151009	0.002055786	HPKIIITGPH	20	full	6458.189236	calibration2.csv	0.001690134	0.000288559	0.5	0.591668972	0.101016513	3.495405563	-0.301029996	0.482729144	3.567793612	0.875477164	-0.42091176	0.311296379	-0.905771603	0.298993058	-1.711341357	0.293396208	-0.154850351	0.237989597	245.8711187	76.53878899
1078	621.4834352	63	748	249.8611567	117	0.401399918	23.199026	MAGPHPKIIITGPHEE	Kd	591.6689724	101.0165132	5.857151009	0.002055786	HPKIIITGPH	20	full	6458.189236	calibration2.csv	0.001690134	0.000288559	0.063	0.591668972	0.101016513	2.873901598	-1.200659451	0.482729144	3.567793612	0.875477164	-0.42091176	0.311296379	-0.905771603	0.298993058	-1.711341357	0.293396208	-0.154850351	0.237989597	245.8711187	76.53878899
1079	3939.229639	1000	4144.75	2759.699067	102	0.60405495	274.6003205	MAGPHPKIIITGPHEE	Kd	639.4548753	117.7901925	5.428761614	0.002874716	HPKIIITGPH	21	full	6458.189236	calibration2.csv	0.001563832	0.000288064	1	0.639454875	0.117790193	3.61749834	0	0.476078011	3.551579582	0.881538774	-0.42091176	0.311296379	-0.905771603	0.298993058	-1.711341357	0.293396208	-0.154850351	0.237989597	245.8711187	76.53878899
1080	1056.012174	125	1541.5	621.8375438	103	0.425065317	61.57109161	MAGPHPKIIITGPHEE	Kd	639.4548753	117.7901925	5.428761614	0.002874716	HPKIIITGPH	21	full	6458.189236	calibration2.csv	0.001563832	0.000288064	0.125	0.639454875	0.117790193	3.187943529	-0.903089987	0.476078011	3.551579582	0.881538774	-0.42091176	0.311296379	-0.905771603	0.298993058	-1.711341357	0.293396208	-0.154850351	0.237989597	245.8711187	76.53878899
1081	4893.578061	2000	3828	5190.06375	93	0.901164606	541.1015509	MAGPHPKIIITGPHEE	Kd	639.4548753	117.7901925	5.428761614	0.002874716	HPKIIITGPH	21	full	6458.189236	calibration2.csv	0.001563832	0.000288064	2	0.639454875	0.117790193	3.582971929	0.301029996	0.476078011	3.551579582	0.881538774	-0.42091176	0.311296379	-0.905771603	0.298993058	-1.711341357	0.293396208	-0.154850351	0.237989597	245.8711187	76.53878899
1082	1815.209915	250	1780	734.4471166	83	0.463985498	81.10611591	MAGPHPKIIITGPHEE	Kd	639.4548753	117.7901925	5.428761614	0.002874716	HPKIIITGPH	21	full	6458.189236	calibration2.csv	0.001563832	0.000288064	0.25	0.639454875	0.117790193	3.250420002	-0.602059991	0.476078011	3.551579582	0.881538774	-0.42091176	0.311296379	-0.905771603	0.298993058	-1.711341357	0.293396208	-0.154850351	0.237989597	245.8711187	76.53878899
1083	2833.894249	500	3125	1870.325456	68	0.560851852	228.4966217	MAGPHPKIIITGPHEE	Kd	639.4548753	117.7901925	5.428761614	0.002874716	HPKIIITGPH	21	full	6458.189236	calibration2.csv	0.001563832	0.000288064	0.5	0.639454875	0.117790193	3.494850022	-0.301029996	0.476078011	3.551579582	0.881538774	-0.42091176	0.311296379	-0.905771603	0.298993058	-1.711341357	0.293396208	-0.154850351	0.237989597	245.8711187	76.53878899
1084	579.205777	63	772	222.6573554	107	0.364830397	21.62639415	MAGPHPKIIITGPHEE	Kd	639.4548753	117.7901925	5.428761614	0.002874716	HPKIIITGPH	21	full	6458.189236	calibration2.csv	0.001563832	0.000288064	0.063	0.639454875	0.117790193	2.8876173	-1.200659451	0.476078011	3.551579582	0.881538774	-0.42091176	0.311296379	-0.905771603	0.298993058	-1.711341357	0.293396208	-0.154850351	0.237989597	245.8711187	76.53878899
1085	742.9649249	1000	898	794.8650406	89	0.923597997	84.73289803	MAGPHPKIVLTGPHEE	Kd	7692.45508	1415.058099	5.43614081	0.002857679	HPKIVLTGPH	22	full	6458.189236	calibration2.csv	0.000129998	2.39E-05	1	7.69245508	1.415058099	2.953276337	0	0.482192446	2.927482603	0.971508855	1.100161679	0.318740154	0.615301836	0.306735551	-0.190267918	0.301282566	1.366223088	0.24764672	3196.639716	1018.897434
1086	103.2655316	125	332	227.1347671	71	1.066148914	27.14779719	MAGPHPKIVLTGPHEE	Kd	7692.45508	1415.058099	5.43614081	0.002857679	HPKIVLTGPH	22	full	6458.189236	calibration2.csv	0.000129998	2.39E-05	0.125	7.69245508	1.415058099	2.521138084	-0.903089987	0.482192446	2.927482603	0.971508855	1.100161679	0.318740154	0.615301836	0.306735551	-0.190267918	0.301282566	1.366223088	0.24764672	3196.639716	1018.897434
1087	1332.621959	2000	1068	2040.015741	80	1.149179204	229.5197027	MAGPHPKIVLTGPHEE	Kd	7692.45508	1415.058099	5.43614081	0.002857679	HPKIVLTGPH	22	full	6458.189236	calibration2.csv	0.000129998	2.39E-05	2	7.69245508	1.415058099	3.028571253	0.301029996	0.482192446	2.927482603	0.971508855	1.100161679	0.318740154	0.615301836	0.306735551	-0.190267918	0.301282566	1.366223088	0.24764672	3196.639716	1018.897434
1088	203.2806346	250	398	327.7392862	94	1.086837399	33.98498083	MAGPHPKIVLTGPHEE	Kd	7692.45508	1415.058099	5.43614081	0.002857679	HPKIVLTGPH	22	full	6458.189236	calibration2.csv	0.000129998	2.39E-05	0.25	7.69245508	1.415058099	2.599883072	-0.602059991	0.482192446	2.927482603	0.971508855	1.100161679	0.318740154	0.615301836	0.306735551	-0.190267918	0.301282566	1.366223088	0.24764672	3196.639716	1018.897434
1089	394.1546931	500	686.5	624.1287848	64	1.041163619	78.63283574	MAGPHPKIVLTGPHEE	Kd	7692.45508	1415.058099	5.43614081	0.002857679	HPKIVLTGPH	22	full	6458.189236	calibration2.csv	0.000129998	2.39E-05	0.5	7.69245508	1.415058099	2.836640542	-0.301029996	0.482192446	2.927482603	0.971508855	1.100161679	0.318740154	0.615301836	0.306735551	-0.190267918	0.301282566	1.366223088	0.24764672	3196.639716	1018.897434
1090	52.46190167	63	209.25	92.9631046	88	1.965110066	9.966690972	MAGPHPKIVLTGPHEE	Kd	7692.45508	1415.058099	5.43614081	0.002857679	HPKIVLTGPH	22	full	6458.189236	calibration2.csv	0.000129998	2.39E-05	0.063	7.69245508	1.415058099	2.320665467	-1.200659451	0.482192446	2.927482603	0.971508855	1.100161679	0.318740154	0.615301836	0.306735551	-0.190267918	0.301282566	1.366223088	0.24764672	3196.639716	1018.897434
1091	681.7902167	1000	866.5	1212.168977	105	1.421652919	118.8629474	MAGPHPKIVLTGPHEE	Kd	8472.399395	1747.848014	4.847331877	0.004684768	HPKIVLTGPH	23	full	6458.189236	calibration2.csv	0.00011803	2.43E-05	1	8.472399395	1.747848014	2.937768567	0	0.4595465	2.898884953	0.960507849	1.100161679	0.318740154	0.615301836	0.306735551	-0.190267918	0.301282566	1.366223088	0.24764672	3196.639716	1018.897434
1092	93.89742379	125	314.5	159.0559448	86	0.924712608	17.25203946	MAGPHPKIVLTGPHEE	Kd	8472.399395	1747.848014	4.847331877	0.004684768	HPKIVLTGPH	23	full	6458.189236	calibration2.csv	0.00011803	2.43E-05	0.125	8.472399395	1.747848014	2.49762065	-0.903089987	0.4595465	2.898884953	0.960507849	1.100161679	0.318740154	0.615301836	0.306735551	-0.190267918	0.301282566	1.366223088	0.24764672	3196.639716	1018.897434
1093	1233.373364	2000	951	1237.540878	85	1.009689577	135.0267798	MAGPHPKIVLTGPHEE	Kd	8472.399395	1747.848014	4.847331877	0.004684768	HPKIVLTGPH	23	full	6458.189236	calibration2.csv	0.00011803	2.43E-05	2	8.472399395	1.747848014	2.978180517	0.301029996	0.4595465	2.898884953	0.960507849	1.100161679	0.318740154	0.615301836	0.306735551	-0.190267918	0.301282566	1.366223088	0.24764672	3196.639716	1018.897434
1094	185.1035748	250	389	272.2603517	89	1.146088272	29.02305101	MAGPHPKIVLTGPHEE	Kd	8472.399395	1747.848014	4.847331877	0.004684768	HPKIVLTGPH	23	full	6458.189236	calibration2.csv	0.00011803	2.43E-05	0.25	8.472399395	1.747848014	2.589949601	-0.602059991	0.4595465	2.898884953	0.960507849	1.100161679	0.318740154	0.615301836	0.306735551	-0.190267918	0.301282566	1.366223088	0.24764672	3196.639716	1018.897434
1095	359.8919838	500	667	1570.193719	80	2.064160142	176.6605955	MAGPHPKIVLTGPHEE	Kd	8472.399395	1747.848014	4.847331877	0.004684768	HPKIVLTGPH	23	full	6458.189236	calibration2.csv	0.00011803	2.43E-05	0.5	8.472399395	1.747848014	2.824125834	-0.301029996	0.4595465	2.898884953	0.960507849	1.100161679	0.318740154	0.615301836	0.306735551	-0.190267918	0.301282566	1.366223088	0.24764672	3196.639716	1018.897434
1096	47.66805899	63	210	83.10980439	77	1.905450331	9.533348383	MAGPHPKIVLTGPHEE	Kd	8472.399395	1747.848014	4.847331877	0.004684768	HPKIVLTGPH	23	full	6458.189236	calibration2.csv	0.00011803	2.43E-05	0.063	8.472399395	1.747848014	2.322219295	-1.200659451	0.4595465	2.898884953	0.960507849	1.100161679	0.318740154	0.615301836	0.306735551	-0.190267918	0.301282566	1.366223088	0.24764672	3196.639716	1018.897434
1097	590.5672605	1000	843	549.867671	89	0.698533693	58.61609068	MAGPHPKIVIQGPHEE	Kd	9935.569355	2368.110708	4.195567936	0.008525894	HPKIVIQGPH	24	full	6458.189236	calibration2.csv	0.000100648	2.40E-05	1	9.935569355	2.368110708	2.925827575	0	0.434032611	2.847873393	0.93152914	1.251899226	0.352938205	0.767039383	0.34213563	-0.038530371	0.337255504	1.517960636	0.290342881	4128.777519	1457.203325
1098	80.24134877	125	285	119.9255549	80	0.821161843	13.49267908	MAGPHPKIVIQGPHEE	Kd	9935.569355	2368.110708	4.195567936	0.008525894	HPKIVIQGPH	24	full	6458.189236	calibration2.csv	0.000100648	2.40E-05	0.125	9.935569355	2.368110708	2.45484486	-0.903089987	0.434032611	2.847873393	0.93152914	1.251899226	0.352938205	0.767039383	0.34213563	-0.038530371	0.337255504	1.517960636	0.290342881	4128.777519	1457.203325
1099	1082.17531	2000	779	965.1201581	91	1.013220286	101.7325972	MAGPHPKIVIQGPHEE	Kd	9935.569355	2368.110708	4.195567936	0.008525894	HPKIVIQGPH	24	full	6458.189236	calibration2.csv	0.000100648	2.40E-05	2	9.935569355	2.368110708	2.891537458	0.301029996	0.434032611	2.847873393	0.93152914	1.251899226	0.352938205	0.767039383	0.34213563	-0.038530371	0.337255504	1.517960636	0.290342881	4128.777519	1457.203325
1100	158.5132115	250	372.5	128.4235441	75	0.593728821	14.92893376	MAGPHPKIVIQGPHEE	Kd	9935.569355	2368.110708	4.195567936	0.008525894	HPKIVIQGPH	24	full	6458.189236	calibration2.csv	0.000100648	2.40E-05	0.25	9.935569355	2.368110708	2.571126277	-0.602059991	0.434032611	2.847873393	0.93152914	1.251899226	0.352938205	0.767039383	0.34213563	-0.038530371	0.337255504	1.517960636	0.290342881	4128.777519	1457.203325
1101	309.4315708	500	587.5	324.3216039	83	0.667883068	35.81532966	MAGPHPKIVIQGPHEE	Kd	9935.569355	2368.110708	4.195567936	0.008525894	HPKIVIQGPH	24	full	6458.189236	calibration2.csv	0.000100648	2.40E-05	0.5	9.935569355	2.368110708	2.769007871	-0.301029996	0.434032611	2.847873393	0.93152914	1.251899226	0.352938205	0.767039383	0.34213563	-0.038530371	0.337255504	1.517960636	0.290342881	4128.777519	1457.203325
1102	40.69241383	63	199.75	37.93736683	130	1.147343885	3.340198901	MAGPHPKIVIQGPHEE	Kd	9935.569355	2368.110708	4.195567936	0.008525894	HPKIVIQGPH	24	full	6458.189236	calibration2.csv	0.000100648	2.40E-05	0.063	9.935569355	2.368110708	2.300486788	-1.200659451	0.434032611	2.847873393	0.93152914	1.251899226	0.352938205	0.767039383	0.34213563	-0.038530371	0.337255504	1.517960636	0.290342881	4128.777519	1457.203325
1103	629.3484451	1000	776	429.622258	92	0.600473201	45.03664986	MAGPHPKIVIQGPHEE	Kd	9261.706828	1924.715527	4.811987381	0.004832367	HPKIVIQGPH	25	full	6458.189236	calibration2.csv	0.000107971	2.24E-05	1	9.261706828	1.924715527	2.889861721	0	0.450912104	2.864797292	0.943023753	1.251899226	0.352938205	0.767039383	0.34213563	-0.038530371	0.337255504	1.517960636	0.290342881	4128.777519	1457.203325
1104	86.00179694	125	287	130.2601811	79	0.817391819	14.74906116	MAGPHPKIVIQGPHEE	Kd	9261.706828	1924.715527	4.811987381	0.004832367	HPKIVIQGPH	25	full	6458.189236	calibration2.csv	0.000107971	2.24E-05	0.125	9.261706828	1.924715527	2.457881897	-0.903089987	0.450912104	2.864797292	0.943023753	1.251899226	0.352938205	0.767039383	0.34213563	-0.038530371	0.337255504	1.517960636	0.290342881	4128.777519	1457.203325
1105	1146.929029	2000	893.5	965.4083247	64	1.102152762	121.6300162	MAGPHPKIVIQGPHEE	Kd	9261.706828	1924.715527	4.811987381	0.004832367	HPKIVIQGPH	25	full	6458.189236	calibration2.csv	0.000107971	2.24E-05	2	9.261706828	1.924715527	2.951094557	0.301029996	0.450912104	2.864797292	0.943023753	1.251899226	0.352938205	0.767039383	0.34213563	-0.038530371	0.337255504	1.517960636	0.290342881	4128.777519	1457.203325
1106	169.7431742	250	339	145.2775826	91	0.666008061	15.3136018	MAGPHPKIVIQGPHEE	Kd	9261.706828	1924.715527	4.811987381	0.004832367	HPKIVIQGPH	25	full	6458.189236	calibration2.csv	0.000107971	2.24E-05	0.25	9.261706828	1.924715527	2.530199698	-0.602059991	0.450912104	2.864797292	0.943023753	1.251899226	0.352938205	0.767039383	0.34213563	-0.038530371	0.337255504	1.517960636	0.290342881	4128.777519	1457.203325
1107	330.7920095	500	660.75	467.448062	74	0.756066065	54.71065743	MAGPHPKIVIQGPHEE	Kd	9261.706828	1924.715527	4.811987381	0.004832367	HPKIVIQGPH	25	full	6458.189236	calibration2.csv	0.000107971	2.24E-05	0.5	9.261706828	1.924715527	2.820037172	-0.301029996	0.450912104	2.864797292	0.943023753	1.251899226	0.352938205	0.767039383	0.34213563	-0.038530371	0.337255504	1.517960636	0.290342881	4128.777519	1457.203325
1108	43.63310605	63	208.75	59.86038294	112	1.301691659	5.68169611	MAGPHPKIVIQGPHEE	Kd	9261.706828	1924.715527	4.811987381	0.004832367	HPKIVIQGPH	25	full	6458.189236	calibration2.csv	0.000107971	2.24E-05	0.063	9.261706828	1.924715527	2.319626484	-1.200659451	0.450912104	2.864797292	0.943023753	1.251899226	0.352938205	0.767039383	0.34213563	-0.038530371	0.337255504	1.517960636	0.290342881	4128.777519	1457.203325
1109	6045.891728	1000	7144.25	5248.50728	72	0.592282502	622.8832172	MAGPIPKIVITGPHEE	Kd	68.19465625	18.08427023	3.770937693	0.01301038	IPKIVITGPH	26	full	6458.189236	calibration2.csv	0.014663906	0.003888663	1	0.068194656	0.01808427	3.853956643	0	0.225131924	3.793910345	0.664449183	-1.702136354	0.371590947	-2.186996197	0.361346433	-2.992565951	0.356729212	-1.436074945	0.31275141	28.33864408	10.53038359
1110	4178.55064	125	4730.5	2652.307848	92	0.501081834	278.0374099	MAGPIPKIVITGPHEE	Kd	68.19465625	18.08427023	3.770937693	0.01301038	IPKIVITGPH	26	full	6458.189236	calibration2.csv	0.014663906	0.003888663	0.125	0.068194656	0.01808427	3.674907047	-0.903089987	0.225131924	3.793910345	0.664449183	-1.702136354	0.371590947	-2.186996197	0.361346433	-2.992565951	0.356729212	-1.436074945	0.31275141	28.33864408	10.53038359
1111	6245.243132	2000	5935	6929.916552	81	0.792086575	774.7882245	MAGPIPKIVITGPHEE	Kd	68.19465625	18.08427023	3.770937693	0.01301038	IPKIVITGPH	26	full	6458.189236	calibration2.csv	0.014663906	0.003888663	2	0.068194656	0.01808427	3.773420723	0.301029996	0.225131924	3.793910345	0.664449183	-1.702136354	0.371590947	-2.186996197	0.361346433	-2.992565951	0.356729212	-1.436074945	0.31275141	28.33864408	10.53038359
1112	5074.086812	250	4380.25	1568.509229	80	0.350301329	176.4710756	MAGPIPKIVITGPHEE	Kd	68.19465625	18.08427023	3.770937693	0.01301038	IPKIVITGPH	26	full	6458.189236	calibration2.csv	0.014663906	0.003888663	0.25	0.068194656	0.01808427	3.641498898	-0.602059991	0.225131924	3.793910345	0.664449183	-1.702136354	0.371590947	-2.186996197	0.361346433	-2.992565951	0.356729212	-1.436074945	0.31275141	28.33864408	10.53038359
1113	5683.078119	500	5979.5	3354.498168	76	0.505253077	387.344084	MAGPIPKIVITGPHEE	Kd	68.19465625	18.08427023	3.770937693	0.01301038	IPKIVITGPH	26	full	6458.189236	calibration2.csv	0.014663906	0.003888663	0.5	0.068194656	0.01808427	3.77666487	-0.301029996	0.225131924	3.793910345	0.664449183	-1.702136354	0.371590947	-2.186996197	0.361346433	-2.992565951	0.356729212	-1.436074945	0.31275141	28.33864408	10.53038359
1114	3101.238522	63	2715.5	817.6392075	80	0.309912853	91.99159796	MAGPIPKIVITGPHEE	Kd	68.19465625	18.08427023	3.770937693	0.01301038	IPKIVITGPH	26	full	6458.189236	calibration2.csv	0.014663906	0.003888663	0.063	0.068194656	0.01808427	3.433849807	-1.200659451	0.225131924	3.793910345	0.664449183	-1.702136354	0.371590947	-2.186996197	0.361346433	-2.992565951	0.356729212	-1.436074945	0.31275141	28.33864408	10.53038359
1115	6077.220414	1000	6943	5726.228221	79	0.657182207	648.3676707	MAGPIPKIVITGPHEE	Kd	62.68800477	13.66742886	4.586671379	0.005911478	IPKIVITGPH	27	full	6458.189236	calibration2.csv	0.015952015	0.003477907	1	0.062688005	0.013667429	3.841547165	0	0.245700353	3.818492769	0.808461402	-1.702136354	0.371590947	-2.186996197	0.361346433	-2.992565951	0.356729212	-1.436074945	0.31275141	28.33864408	10.53038359
1116	4301.146765	125	4627.5	2175.993719	91	0.452755715	229.3698775	MAGPIPKIVITGPHEE	Kd	62.68800477	13.66742886	4.586671379	0.005911478	IPKIVITGPH	27	full	6458.189236	calibration2.csv	0.015952015	0.003477907	0.125	0.062688005	0.013667429	3.665346427	-0.903089987	0.245700353	3.818492769	0.808461402	-1.702136354	0.371590947	-2.186996197	0.361346433	-2.992565951	0.356729212	-1.436074945	0.31275141	28.33864408	10.53038359
1117	6261.915734	2000	6882	6015.692123	71	0.6538996	719.012733	MAGPIPKIVITGPHEE	Kd	62.68800477	13.66742886	4.586671379	0.005911478	IPKIVITGPH	27	full	6458.189236	calibration2.csv	0.015952015	0.003477907	2	0.062688005	0.013667429	3.837714668	0.301029996	0.245700353	3.818492769	0.808461402	-1.702136354	0.371590947	-2.186996197	0.361346433	-2.992565951	0.356729212	-1.436074945	0.31275141	28.33864408	10.53038359
1118	5163.444981	250	5084	2931.915903	68	0.522291829	358.1905368	MAGPIPKIVITGPHEE	Kd	62.68800477	13.66742886	4.586671379	0.005911478	IPKIVITGPH	27	full	6458.189236	calibration2.csv	0.015952015	0.003477907	0.25	0.062688005	0.013667429	3.706205542	-0.602059991	0.245700353	3.818492769	0.808461402	-1.702136354	0.371590947	-2.186996197	0.361346433	-2.992565951	0.356729212	-1.436074945	0.31275141	28.33864408	10.53038359
1119	5738.694606	500	5737	2590.158085	63	0.407626345	328.9504057	MAGPIPKIVITGPHEE	Kd	62.68800477	13.66742886	4.586671379	0.005911478	IPKIVITGPH	27	full	6458.189236	calibration2.csv	0.015952015	0.003477907	0.5	0.062688005	0.013667429	3.75868485	-0.301029996	0.245700353	3.818492769	0.808461402	-1.702136354	0.371590947	-2.186996197	0.361346433	-2.992565951	0.356729212	-1.436074945	0.31275141	28.33864408	10.53038359
1120	3237.110197	63	2733	950.5814167	58	0.348465711	125.9075844	MAGPIPKIVITGPHEE	Kd	62.68800477	13.66742886	4.586671379	0.005911478	IPKIVITGPH	27	full	6458.189236	calibration2.csv	0.015952015	0.003477907	0.063	0.062688005	0.013667429	3.436639632	-1.200659451	0.245700353	3.818492769	0.808461402	-1.702136354	0.371590947	-2.186996197	0.361346433	-2.992565951	0.356729212	-1.436074945	0.31275141	28.33864408	10.53038359
1121	5182.684772	1000	5026	2738.505429	73	0.496872401	322.7359599	MAGPTPKIVITGPHEE	Kd	246.1088258	35.89624459	6.856116249	0.001008533	TPKIVITGPH	28	full	6458.189236	calibration2.csv	0.004063243	0.000592645	1	0.246108826	0.035896245	3.701222484	0	0.377350442	3.682392647	0.82346264	-0.94107564	0.298378839	-1.425935483	0.285519429	-2.231505237	0.279653054	-0.675014231	0.220824691	102.2718026	30.5157417
1122	2175.301686	125	2547	1059.204005	82	0.428423519	117.6893338	MAGPTPKIVITGPHEE	Kd	246.1088258	35.89624459	6.856116249	0.001008533	TPKIVITGPH	28	full	6458.189236	calibration2.csv	0.004063243	0.000592645	0.125	0.246108826	0.035896245	3.406028945	-0.903089987	0.377350442	3.682392647	0.82346264	-0.94107564	0.298378839	-1.425935483	0.285519429	-2.231505237	0.279653054	-0.675014231	0.220824691	102.2718026	30.5157417
1123	5750.557731	2000	4994	5799.722226	88	0.810426091	621.7954897	MAGPTPKIVITGPHEE	Kd	246.1088258	35.89624459	6.856116249	0.001008533	TPKIVITGPH	28	full	6458.189236	calibration2.csv	0.004063243	0.000592645	2	0.246108826	0.035896245	3.698448538	0.301029996	0.377350442	3.682392647	0.82346264	-0.94107564	0.298378839	-1.425935483	0.285519429	-2.231505237	0.279653054	-0.675014231	0.220824691	102.2718026	30.5157417
1124	3254.421661	250	2956	936.9723967	101	0.319076873	93.69723967	MAGPTPKIVITGPHEE	Kd	246.1088258	35.89624459	6.856116249	0.001008533	TPKIVITGPH	28	full	6458.189236	calibration2.csv	0.004063243	0.000592645	0.25	0.246108826	0.035896245	3.47070443	-0.602059991	0.377350442	3.682392647	0.82346264	-0.94107564	0.298378839	-1.425935483	0.285519429	-2.231505237	0.279653054	-0.675014231	0.220824691	102.2718026	30.5157417
1125	4327.913712	500	4730	1943.520802	78	0.399582012	221.484751	MAGPTPKIVITGPHEE	Kd	246.1088258	35.89624459	6.856116249	0.001008533	TPKIVITGPH	28	full	6458.189236	calibration2.csv	0.004063243	0.000592645	0.5	0.246108826	0.035896245	3.674861141	-0.301029996	0.377350442	3.682392647	0.82346264	-0.94107564	0.298378839	-1.425935483	0.285519429	-2.231505237	0.279653054	-0.675014231	0.220824691	102.2718026	30.5157417
1126	1316.254626	63	1324.5	291.1682699	90	0.259921387	30.86377488	MAGPTPKIVITGPHEE	Kd	246.1088258	35.89624459	6.856116249	0.001008533	TPKIVITGPH	28	full	6458.189236	calibration2.csv	0.004063243	0.000592645	0.063	0.246108826	0.035896245	3.122051963	-1.200659451	0.377350442	3.682392647	0.82346264	-0.94107564	0.298378839	-1.425935483	0.285519429	-2.231505237	0.279653054	-0.675014231	0.220824691	102.2718026	30.5157417
1127	5070.896605	1000	5058.25	2281.171647	102	0.410286288	226.9850626	MAGPTPKIVITGPHEE	Kd	273.5793567	39.96954498	6.8446953	0.001016273	TPKIVITGPH	29	full	6458.189236	calibration2.csv	0.003655247	0.000534026	1	0.273579357	0.039969545	3.70400029	0	0.362181777	3.664864852	0.861549735	-0.94107564	0.298378839	-1.425935483	0.285519429	-2.231505237	0.279653054	-0.675014231	0.220824691	102.2718026	30.5157417
1128	2025.377484	125	2424.5	1153.168334	88	0.477861059	123.6326226	MAGPTPKIVITGPHEE	Kd	273.5793567	39.96954498	6.8446953	0.001016273	TPKIVITGPH	29	full	6458.189236	calibration2.csv	0.003655247	0.000534026	0.125	0.273579357	0.039969545	3.384622188	-0.903089987	0.362181777	3.664864852	0.861549735	-0.94107564	0.298378839	-1.425935483	0.285519429	-2.231505237	0.279653054	-0.675014231	0.220824691	102.2718026	30.5157417
1129	5681.076596	2000	4797.5	4408.58469	111	0.703586061	420.3420573	MAGPTPKIVITGPHEE	Kd	273.5793567	39.96954498	6.8446953	0.001016273	TPKIVITGPH	29	full	6458.189236	calibration2.csv	0.003655247	0.000534026	2	0.273579357	0.039969545	3.681014983	0.301029996	0.362181777	3.664864852	0.861549735	-0.94107564	0.298378839	-1.425935483	0.285519429	-2.231505237	0.279653054	-0.675014231	0.220824691	102.2718026	30.5157417
1130	3083.672586	250	2948	1093.060179	93	0.389516285	113.9594014	MAGPTPKIVITGPHEE	Kd	273.5793567	39.96954498	6.8446953	0.001016273	TPKIVITGPH	29	full	6458.189236	calibration2.csv	0.003655247	0.000534026	0.25	0.273579357	0.039969545	3.469527479	-0.602059991	0.362181777	3.664864852	0.861549735	-0.94107564	0.298378839	-1.425935483	0.285519429	-2.231505237	0.279653054	-0.675014231	0.220824691	102.2718026	30.5157417
1131	4174.225424	500	4246.5	1902.779098	77	0.412638169	218.2637316	MAGPTPKIVITGPHEE	Kd	273.5793567	39.96954498	6.8446953	0.001016273	TPKIVITGPH	29	full	6458.189236	calibration2.csv	0.003655247	0.000534026	0.5	0.273579357	0.039969545	3.628031128	-0.301029996	0.362181777	3.664864852	0.861549735	-0.94107564	0.298378839	-1.425935483	0.285519429	-2.231505237	0.279653054	-0.675014231	0.220824691	102.2718026	30.5157417
1132	1208.826132	63	1386.75	333.4031775	136	0.271271932	28.69477676	MAGPTPKIVITGPHEE	Kd	273.5793567	39.96954498	6.8446953	0.001016273	TPKIVITGPH	29	full	6458.189236	calibration2.csv	0.003655247	0.000534026	0.063	0.273579357	0.039969545	3.141998175	-1.200659451	0.362181777	3.664864852	0.861549735	-0.94107564	0.298378839	-1.425935483	0.285519429	-2.231505237	0.279653054	-0.675014231	0.220824691	102.2718026	30.5157417
1133	914.0658519	1000	1317.75	1285.69271	86	0.787712107	139.4529541	MAGPHPKIVITTPHEE	Kd	6065.343512	1817.903738	3.336449222	0.020632595	HPKIVITTPH	30	full	6458.189236	calibration2.csv	0.000164871	4.94E-05	1	6.065343512	1.817903738	3.119833025	0	0.448609557	3.028339561	0.7990195	0.959235934	0.396973776	0.474376092	0.387401073	-0.331193663	0.383098	1.225297344	0.342522687	2520.485042	1000.566464
1134	130.4085392	125	461.5	279.750774	90	0.783835175	29.65352274	MAGPHPKIVITTPHEE	Kd	6065.343512	1817.903738	3.336449222	0.020632595	HPKIVITTPH	30	full	6458.189236	calibration2.csv	0.000164871	4.94E-05	0.125	6.065343512	1.817903738	2.664171705	-0.903089987	0.448609557	3.028339561	0.7990195	0.959235934	0.396973776	0.474376092	0.387401073	-0.331193663	0.383098	1.225297344	0.342522687	2520.485042	1000.566464
1135	1601.466627	2000	1018.25	2521.757586	86	1.332345168	273.5230138	MAGPHPKIVITTPHEE	Kd	6065.343512	1817.903738	3.336449222	0.020632595	HPKIVITTPH	30	full	6458.189236	calibration2.csv	0.000164871	4.94E-05	2	6.065343512	1.817903738	3.007854419	0.301029996	0.448609557	3.028339561	0.7990195	0.959235934	0.396973776	0.474376092	0.387401073	-0.331193663	0.383098	1.225297344	0.342522687	2520.485042	1000.566464
1136	255.6547092	250	559.75	328.7948797	76	0.770557552	37.96596246	MAGPHPKIVITTPHEE	Kd	6065.343512	1817.903738	3.336449222	0.020632595	HPKIVITTPH	30	full	6458.189236	calibration2.csv	0.000164871	4.94E-05	0.25	6.065343512	1.817903738	2.747994102	-0.602059991	0.448609557	3.028339561	0.7990195	0.959235934	0.396973776	0.474376092	0.387401073	-0.331193663	0.383098	1.225297344	0.342522687	2520.485042	1000.566464
1137	491.8394006	500	1057	670.1607387	89	0.641388346	71.43937478	MAGPHPKIVITTPHEE	Kd	6065.343512	1817.903738	3.336449222	0.020632595	HPKIVITTPH	30	full	6458.189236	calibration2.csv	0.000164871	4.94E-05	0.5	6.065343512	1.817903738	3.024074987	-0.301029996	0.448609557	3.028339561	0.7990195	0.959235934	0.396973776	0.474376092	0.387401073	-0.331193663	0.383098	1.225297344	0.342522687	2520.485042	1000.566464
1138	66.39084788	63	246.75	59.36126599	100	0.760944315	5.966031708	MAGPHPKIVITTPHEE	Kd	6065.343512	1817.903738	3.336449222	0.020632595	HPKIVITTPH	30	full	6458.189236	calibration2.csv	0.000164871	4.94E-05	0.063	6.065343512	1.817903738	2.392257161	-1.200659451	0.448609557	3.028339561	0.7990195	0.959235934	0.396973776	0.474376092	0.387401073	-0.331193663	0.383098	1.225297344	0.342522687	2520.485042	1000.566464
1139	925.467227	1000	1303.25	1450.047909	80	1.231528561	163.1431359	MAGPHPKIVITTPHEE	Kd	5978.301389	1580.718728	3.782014651	0.012863282	HPKIVITTPH	31	full	6458.189236	calibration2.csv	0.000167272	4.42E-05	1	5.978301389	1.580718728	3.115027734	0	0.467815085	3.030461157	0.868861472	0.959235934	0.396973776	0.474376092	0.387401073	-0.331193663	0.383098	1.225297344	0.342522687	2520.485042	1000.566464
1140	132.2683582	125	439.5	278.5054965	97	0.810058117	28.4248482	MAGPHPKIVITTPHEE	Kd	5978.301389	1580.718728	3.782014651	0.012863282	HPKIVITTPH	31	full	6458.189236	calibration2.csv	0.000167272	4.42E-05	0.125	5.978301389	1.580718728	2.642958879	-0.903089987	0.467815085	3.030461157	0.868861472	0.959235934	0.396973776	0.474376092	0.387401073	-0.331193663	0.383098	1.225297344	0.342522687	2520.485042	1000.566464
1141	1618.938398	2000	1097	1719.910821	86	1.082540139	186.5505209	MAGPHPKIVITTPHEE	Kd	5978.301389	1580.718728	3.782014651	0.012863282	HPKIVITTPH	31	full	6458.189236	calibration2.csv	0.000167272	4.42E-05	2	5.978301389	1.580718728	3.040206628	0.301029996	0.467815085	3.030461157	0.868861472	0.959235934	0.396973776	0.474376092	0.387401073	-0.331193663	0.383098	1.225297344	0.342522687	2520.485042	1000.566464
1142	259.2275499	250	587	265.9365305	105	0.618847682	26.07722227	MAGPHPKIVITTPHEE	Kd	5978.301389	1580.718728	3.782014651	0.012863282	HPKIVITTPH	31	full	6458.189236	calibration2.csv	0.000167272	4.42E-05	0.25	5.978301389	1.580718728	2.768638101	-0.602059991	0.467815085	3.030461157	0.868861472	0.959235934	0.396973776	0.474376092	0.387401073	-0.331193663	0.383098	1.225297344	0.342522687	2520.485042	1000.566464
1143	498.4477294	500	935	513.1978088	115	0.600524518	48.06537863	MAGPHPKIVITTPHEE	Kd	5978.301389	1580.718728	3.782014651	0.012863282	HPKIVITTPH	31	full	6458.189236	calibration2.csv	0.000167272	4.42E-05	0.5	5.978301389	1.580718728	2.970811611	-0.301029996	0.467815085	3.030461157	0.868861472	0.959235934	0.396973776	0.474376092	0.387401073	-0.331193663	0.383098	1.225297344	0.342522687	2520.485042	1000.566464
1144	67.34739681	63	239.5	62.32141753	108	0.826310612	6.024838838	MAGPHPKIVITTPHEE	Kd	5978.301389	1580.718728	3.782014651	0.012863282	HPKIVITTPH	31	full	6458.189236	calibration2.csv	0.000167272	4.42E-05	0.063	5.978301389	1.580718728	2.379305518	-1.200659451	0.467815085	3.030461157	0.868861472	0.959235934	0.396973776	0.474376092	0.387401073	-0.331193663	0.383098	1.225297344	0.342522687	2520.485042	1000.566464
1145	280.7101866	1000	399.5	1126.27305	117	10.41197431	104.5718275	MAGPHPKIVITNPHEE	Kd	22006.60804	6562.347567	3.353465785	0.020251954	HPKIVITNPH	32	full	6458.189236	calibration2.csv	4.54E-05	1.36E-05	1	22.00660804	6.562347567	2.601516784	0	0.258897194	2.549976147	0.840051993	1.72346563	0.395826754	1.238605787	0.386225623	0.433036033	0.381909306	1.989527039	0.34119266	9144.960425	3619.819998
1146	36.47605059	125	221.5	74.45123931	74	1.123219512	8.713858459	MAGPHPKIVITNPHEE	Kd	22006.60804	6562.347567	3.353465785	0.020251954	HPKIVITNPH	32	full	6458.189236	calibration2.csv	4.54E-05	1.36E-05	0.125	22.00660804	6.562347567	2.345373731	-0.903089987	0.258897194	2.549976147	0.840051993	1.72346563	0.395826754	1.238605787	0.386225623	0.433036033	0.381909306	1.989527039	0.34119266	9144.960425	3619.819998
1147	538.0342967	2000	379.5	718.3545735	78	1.78359563	81.8641013	MAGPHPKIVITNPHEE	Kd	22006.60804	6562.347567	3.353465785	0.020251954	HPKIVITNPH	32	full	6458.189236	calibration2.csv	4.54E-05	1.36E-05	2	22.00660804	6.562347567	2.57921178	0.301029996	0.258897194	2.549976147	0.840051993	1.72346563	0.395826754	1.238605787	0.386225623	0.433036033	0.381909306	1.989527039	0.34119266	9144.960425	3619.819998
1148	72.54237961	250	206	90.95761817	90	1.776323236	9.641488243	MAGPHPKIVITNPHEE	Kd	22006.60804	6562.347567	3.353465785	0.020251954	HPKIVITNPH	32	full	6458.189236	calibration2.csv	4.54E-05	1.36E-05	0.25	22.00660804	6.562347567	2.31386722	-0.602059991	0.258897194	2.549976147	0.840051993	1.72346563	0.395826754	1.238605787	0.386225623	0.433036033	0.381909306	1.989527039	0.34119266	9144.960425	3619.819998
1149	143.4731796	500	337.5	239.6583132	77	1.097943782	27.4906939	MAGPHPKIVITNPHEE	Kd	22006.60804	6562.347567	3.353465785	0.020251954	HPKIVITNPH	32	full	6458.189236	calibration2.csv	4.54E-05	1.36E-05	0.5	22.00660804	6.562347567	2.528273777	-0.301029996	0.258897194	2.549976147	0.840051993	1.72346563	0.395826754	1.238605787	0.386225623	0.433036033	0.381909306	1.989527039	0.34119266	9144.960425	3619.819998
1150	18.43557535	63	170.25	154.9870959	96	-47.8416759	15.90134052	MAGPHPKIVITNPHEE	Kd	22006.60804	6562.347567	3.353465785	0.020251954	HPKIVITNPH	32	full	6458.189236	calibration2.csv	4.54E-05	1.36E-05	0.063	22.00660804	6.562347567	2.231087121	-1.200659451	0.258897194	2.549976147	0.840051993	1.72346563	0.395826754	1.238605787	0.386225623	0.433036033	0.381909306	1.989527039	0.34119266	9144.960425	3619.819998
1151	252.1041932	1000	404.25	254.9450115	108	0.976644897	24.64646454	MAGPHPKIVITNPHEE	Kd	24617.14327	8798.370308	2.797920798	0.038086963	HPKIVITNPH	33	full	6458.189236	calibration2.csv	4.06E-05	1.45E-05	1	24.61714327	8.798370308	2.606650029	0	0.217193858	2.516286559	0.654160499	1.72346563	0.395826754	1.238605787	0.386225623	0.433036033	0.381909306	1.989527039	0.34119266	9144.960425	3619.819998
1152	32.62747474	125	203.75	59.26498738	92	1.440522811	6.212658762	MAGPHPKIVITNPHEE	Kd	24617.14327	8798.370308	2.797920798	0.038086963	HPKIVITNPH	33	full	6458.189236	calibration2.csv	4.06E-05	1.45E-05	0.125	24.61714327	8.798370308	2.309097617	-0.903089987	0.217193858	2.516286559	0.654160499	1.72346563	0.395826754	1.238605787	0.386225623	0.433036033	0.381909306	1.989527039	0.34119266	9144.960425	3619.819998
1153	485.2653923	2000	303	573.4887385	75	1.935195509	66.66671169	MAGPHPKIVITNPHEE	Kd	24617.14327	8798.370308	2.797920798	0.038086963	HPKIVITNPH	33	full	6458.189236	calibration2.csv	4.06E-05	1.45E-05	2	24.61714327	8.798370308	2.481442629	0.301029996	0.217193858	2.516286559	0.654160499	1.72346563	0.395826754	1.238605787	0.386225623	0.433036033	0.381909306	1.989527039	0.34119266	9144.960425	3619.819998
1154	64.92693155	250	215.25	123.6376049	118	2.435802217	11.43030062	MAGPHPKIVITNPHEE	Kd	24617.14327	8798.370308	2.797920798	0.038086963	HPKIVITNPH	33	full	6458.189236	calibration2.csv	4.06E-05	1.45E-05	0.25	24.61714327	8.798370308	2.33294316	-0.602059991	0.217193858	2.516286559	0.654160499	1.72346563	0.395826754	1.238605787	0.386225623	0.433036033	0.381909306	1.989527039	0.34119266	9144.960425	3619.819998
1155	128.5613807	500	343.75	285.086291	90	1.289788679	30.21908641	MAGPHPKIVITNPHEE	Kd	24617.14327	8798.370308	2.797920798	0.038086963	HPKIVITNPH	33	full	6458.189236	calibration2.csv	4.06E-05	1.45E-05	0.5	24.61714327	8.798370308	2.536242707	-0.301029996	0.217193858	2.516286559	0.654160499	1.72346563	0.395826754	1.238605787	0.386225623	0.433036033	0.381909306	1.989527039	0.34119266	9144.960425	3619.819998
1156	16.48555754	63	175.25	73.7841298	94	3.09560732	7.651057844	MAGPHPKIVITNPHEE	Kd	24617.14327	8798.370308	2.797920798	0.038086963	HPKIVITNPH	33	full	6458.189236	calibration2.csv	4.06E-05	1.45E-05	0.063	24.61714327	8.798370308	2.243658027	-1.200659451	0.217193858	2.516286559	0.654160499	1.72346563	0.395826754	1.238605787	0.386225623	0.433036033	0.381909306	1.989527039	0.34119266	9144.960425	3619.819998
1157	6243.202417	1000	6955	3771.620046	98	0.479861092	382.949995	MAGPHPVIVITGPZEE	Kd	34.43534329	11.9566435	2.880017564	0.03458738	HPVIVITGPZ	42	full	6458.189236	calibration2.csv	0.029039931	0.010083248	1	0.034435343	0.011956644	3.842297134	0	0.175308155	3.839468378	0.827927672	-2.107323025	0.433956221	-2.592182867	0.425216903	-3.397752622	0.42130025	-1.841261615	0.384774758	14.309786	6.20982066
1158	5063.329359	125	5285.75	1947.716385	80	0.365243191	219.1352139	MAGPHPVIVITGPZEE	Kd	34.43534329	11.9566435	2.880017564	0.03458738	HPVIVITGPZ	42	full	6458.189236	calibration2.csv	0.029039931	0.010083248	0.125	0.034435343	0.011956644	3.723106618	-0.903089987	0.175308155	3.839468378	0.827927672	-2.107323025	0.433956221	-2.592182867	0.425216903	-3.397752622	0.42130025	-1.841261615	0.384774758	14.309786	6.20982066
1159	6348.876367	2000	7235.5	4992.118561	94	0.55462936	517.6585802	MAGPHPVIVITGPZEE	Kd	34.43534329	11.9566435	2.880017564	0.03458738	HPVIVITGPZ	42	full	6458.189236	calibration2.csv	0.029039931	0.010083248	2	0.034435343	0.011956644	3.859468548	0.301029996	0.175308155	3.839468378	0.827927672	-2.107323025	0.433956221	-2.592182867	0.425216903	-3.397752622	0.42130025	-1.841261615	0.384774758	14.309786	6.20982066
1160	5676.324504	250	5149	1561.685462	79	0.285364709	176.8260583	MAGPHPVIVITGPZEE	Kd	34.43534329	11.9566435	2.880017564	0.03458738	HPVIVITGPZ	42	full	6458.189236	calibration2.csv	0.029039931	0.010083248	0.25	0.034435343	0.011956644	3.711722892	-0.602059991	0.175308155	3.839468378	0.827927672	-2.107323025	0.433956221	-2.592182867	0.425216903	-3.397752622	0.42130025	-1.841261615	0.384774758	14.309786	6.20982066
1161	6042.067873	500	6894.75	3151.396698	80	0.427842467	354.5598296	MAGPHPVIVITGPZEE	Kd	34.43534329	11.9566435	2.880017564	0.03458738	HPVIVITGPZ	42	full	6458.189236	calibration2.csv	0.029039931	0.010083248	0.5	0.034435343	0.011956644	3.838518524	-0.301029996	0.175308155	3.839468378	0.827927672	-2.107323025	0.433956221	-2.592182867	0.425216903	-3.397752622	0.42130025	-1.841261615	0.384774758	14.309786	6.20982066
1162	4175.752947	63	3866.75	913.7708796	84	0.244719869	100.2993844	MAGPHPVIVITGPZEE	Kd	34.43534329	11.9566435	2.880017564	0.03458738	HPVIVITGPZ	42	full	6458.189236	calibration2.csv	0.029039931	0.010083248	0.063	0.034435343	0.011956644	3.587346094	-1.200659451	0.175308155	3.839468378	0.827927672	-2.107323025	0.433956221	-2.592182867	0.425216903	-3.397752622	0.42130025	-1.841261615	0.384774758	14.309786	6.20982066
1163	6289.623916	1000	7988.5	3341.522178	85	0.405296253	364.58996	MAGPHPVIVITGPZEE	Kd	26.80054045	17.60298535	1.522499731	0.188378138	HPVIVITGPZ	43	full	6458.189236	calibration2.csv	0.03731268	0.024507512	1	0.02680054	0.017602985	3.90246524	0	0.200936923	3.880901017	0.841184371	-2.107323025	0.433956221	-2.592182867	0.425216903	-3.397752622	0.42130025	-1.841261615	0.384774758	14.309786	6.20982066
1164	5317.989331	125	5655	3361.230902	73	0.53879423	396.1248606	MAGPHPVIVITGPZEE	Kd	26.80054045	17.60298535	1.522499731	0.188378138	HPVIVITGPZ	43	full	6458.189236	calibration2.csv	0.03731268	0.024507512	0.125	0.02680054	0.017602985	3.752432609	-0.903089987	0.200936923	3.880901017	0.841184371	-2.107323025	0.433956221	-2.592182867	0.425216903	-3.397752622	0.42130025	-1.841261615	0.384774758	14.309786	6.20982066
1165	6372.7921	2000	7900	6058.00865	87	0.598237968	653.2518728	MAGPHPVIVITGPZEE	Kd	26.80054045	17.60298535	1.522499731	0.188378138	HPVIVITGPZ	43	full	6458.189236	calibration2.csv	0.03731268	0.024507512	2	0.02680054	0.017602985	3.897627091	0.301029996	0.200936923	3.880901017	0.841184371	-2.107323025	0.433956221	-2.592182867	0.425216903	-3.397752622	0.42130025	-1.841261615	0.384774758	14.309786	6.20982066
1166	5832.890739	250	5649.5	1614.60024	76	0.276986877	186.4379767	MAGPHPVIVITGPZEE	Kd	26.80054045	17.60298535	1.522499731	0.188378138	HPVIVITGPZ	43	full	6458.189236	calibration2.csv	0.03731268	0.024507512	0.25	0.02680054	0.017602985	3.752010013	-0.602059991	0.200936923	3.880901017	0.841184371	-2.107323025	0.433956221	-2.592182867	0.425216903	-3.397752622	0.42130025	-1.841261615	0.384774758	14.309786	6.20982066
1167	6129.634216	500	7119	3009.704849	88	0.38107698	322.6742295	MAGPHPVIVITGPZEE	Kd	26.80054045	17.60298535	1.522499731	0.188378138	HPVIVITGPZ	43	full	6458.189236	calibration2.csv	0.03731268	0.024507512	0.5	0.02680054	0.017602985	3.852418993	-0.301029996	0.200936923	3.880901017	0.841184371	-2.107323025	0.433956221	-2.592182867	0.425216903	-3.397752622	0.42130025	-1.841261615	0.384774758	14.309786	6.20982066
1168	4530.773644	63	3843.75	828.2746033	88	0.232821559	88.80035844	MAGPHPVIVITGPZEE	Kd	26.80054045	17.60298535	1.522499731	0.188378138	HPVIVITGPZ	43	full	6458.189236	calibration2.csv	0.03731268	0.024507512	0.063	0.02680054	0.017602985	3.584755133	-1.200659451	0.200936923	3.880901017	0.841184371	-2.107323025	0.433956221	-2.592182867	0.425216903	-3.397752622	0.42130025	-1.841261615	0.384774758	14.309786	6.20982066
1169	3652.364948	1000	3121	1096.399306	74	0.3573441	128.3238325	KRMEPIAIIITDTEIS	Kd	768.2212288	127.3714814	6.031344066	0.001803566	PIAIIITDTEIS	54	full	6458.189236	calibration2.csv	0.001301708	0.000215824	1	0.768221229	0.127371481	3.494293769	0	0.443966997	3.521702132	0.95007785	-0.266061409	0.30861953	-0.750921252	0.296205042	-1.556491006	0.290554493	0	0.234477348	319.2383271	98.52318248
1170	903.7779539	125	1332.25	527.7763109	134	0.459678687	45.76401009	KRMEPIAIIITDTEIS	Kd	768.2212288	127.3714814	6.031344066	0.001803566	PIAIIITDTEIS	54	full	6458.189236	calibration2.csv	0.001301708	0.000215824	0.125	0.768221229	0.127371481	3.124585729	-0.903089987	0.443966997	3.521702132	0.95007785	-0.266061409	0.30861953	-0.750921252	0.296205042	-1.556491006	0.290554493	0	0.234477348	319.2383271	98.52318248
1171	4665.948782	2000	4111	1912.903394	95	0.4309005	197.3009203	KRMEPIAIIITDTEIS	Kd	768.2212288	127.3714814	6.031344066	0.001803566	PIAIIITDTEIS	54	full	6458.189236	calibration2.csv	0.001301708	0.000215824	2	0.768221229	0.127371481	3.613947477	0.301029996	0.443966997	3.521702132	0.95007785	-0.266061409	0.30861953	-0.750921252	0.296205042	-1.556491006	0.290554493	0	0.234477348	319.2383271	98.52318248
1172	1585.654731	250	1925.25	576.9679463	78	0.329552318	65.75159976	KRMEPIAIIITDTEIS	Kd	768.2212288	127.3714814	6.031344066	0.001803566	PIAIIITDTEIS	54	full	6458.189236	calibration2.csv	0.001301708	0.000215824	0.25	0.768221229	0.127371481	3.284487132	-0.602059991	0.443966997	3.521702132	0.95007785	-0.266061409	0.30861953	-0.750921252	0.296205042	-1.556491006	0.290554493	0	0.234477348	319.2383271	98.52318248
1173	2546.160358	500	2968	823.8011979	93	0.289451655	85.88721204	KRMEPIAIIITDTEIS	Kd	768.2212288	127.3714814	6.031344066	0.001803566	PIAIIITDTEIS	54	full	6458.189236	calibration2.csv	0.001301708	0.000215824	0.5	0.768221229	0.127371481	3.472463897	-0.301029996	0.443966997	3.521702132	0.95007785	-0.266061409	0.30861953	-0.750921252	0.296205042	-1.556491006	0.290554493	0	0.234477348	319.2383271	98.52318248
1174	489.479705	63	869.25	181.7706372	88	0.276655674	19.48785786	KRMEPIAIIITDTEIS	Kd	768.2212288	127.3714814	6.031344066	0.001803566	PIAIIITDTEIS	54	full	6458.189236	calibration2.csv	0.001301708	0.000215824	0.063	0.768221229	0.127371481	2.939144699	-1.200659451	0.443966997	3.521702132	0.95007785	-0.266061409	0.30861953	-0.750921252	0.296205042	-1.556491006	0.290554493	0	0.234477348	319.2383271	98.52318248
1175	3600.845433	1000	3259.25	1125.692263	96	0.362109927	115.4935893	KRMEPIAIIITDTEIS	Kd	793.5202595	144.8331463	5.478858119	0.00276135	PIAIIITDTEIS	55	full	6458.189236	calibration2.csv	0.001260207	0.000230013	1	0.79352026	0.144833146	3.513117674	0	0.427863339	3.512648075	0.945572195	-0.266061409	0.30861953	-0.750921252	0.296205042	-1.556491006	0.290554493	0	0.234477348	319.2383271	98.52318248
1176	878.8849741	125	1314	517.5916097	146	0.454282928	42.9836436	KRMEPIAIIITDTEIS	Kd	793.5202595	144.8331463	5.478858119	0.00276135	PIAIIITDTEIS	55	full	6458.189236	calibration2.csv	0.001260207	0.000230013	0.125	0.79352026	0.144833146	3.118595365	-0.903089987	0.427863339	3.512648075	0.945572195	-0.266061409	0.30861953	-0.750921252	0.296205042	-1.556491006	0.290554493	0	0.234477348	319.2383271	98.52318248
1177	4623.692428	2000	3816.25	1593.050966	80	0.392272012	179.2322367	KRMEPIAIIITDTEIS	Kd	793.5202595	144.8331463	5.478858119	0.00276135	PIAIIITDTEIS	55	full	6458.189236	calibration2.csv	0.001260207	0.000230013	2	0.79352026	0.144833146	3.581636817	0.301029996	0.427863339	3.512648075	0.945572195	-0.266061409	0.30861953	-0.750921252	0.296205042	-1.556491006	0.290554493	0	0.234477348	319.2383271	98.52318248
1178	1547.212231	250	1955.5	571.3412792	112	0.321491866	54.22931434	KRMEPIAIIITDTEIS	Kd	793.5202595	144.8331463	5.478858119	0.00276135	PIAIIITDTEIS	55	full	6458.189236	calibration2.csv	0.001260207	0.000230013	0.25	0.79352026	0.144833146	3.29125782	-0.602059991	0.427863339	3.512648075	0.945572195	-0.266061409	0.30861953	-0.750921252	0.296205042	-1.556491006	0.290554493	0	0.234477348	319.2383271	98.52318248
1179	2496.361842	500	2894	751.3985275	96	0.267257461	77.0918623	KRMEPIAIIITDTEIS	Kd	793.5202595	144.8331463	5.478858119	0.00276135	PIAIIITDTEIS	55	full	6458.189236	calibration2.csv	0.001260207	0.000230013	0.5	0.79352026	0.144833146	3.461498527	-0.301029996	0.427863339	3.512648075	0.945572195	-0.266061409	0.30861953	-0.750921252	0.296205042	-1.556491006	0.290554493	0	0.234477348	319.2383271	98.52318248
1180	475.0219476	63	895.5	213.184361	91	0.301475176	22.47160475	KRMEPIAIIITDTEIS	Kd	793.5202595	144.8331463	5.478858119	0.00276135	PIAIIITDTEIS	55	full	6458.189236	calibration2.csv	0.001260207	0.000230013	0.063	0.79352026	0.144833146	2.95206559	-1.200659451	0.427863339	3.512648075	0.945572195	-0.266061409	0.30861953	-0.750921252	0.296205042	-1.556491006	0.290554493	0	0.234477348	319.2383271	98.52318248
1181	701.5469662	1000	727	513.0021706	93	0.798527142	53.4841735	KRMEPIPIIITDTEIS	Kd	8205.640601	1312.937902	6.249831457	0.001536915	PIPIIITDTEIS	56	full	6458.189236	calibration2.csv	0.000121867	1.95E-05	1	8.205640601	1.312937902	2.861534411	0	0.452970471	2.889182519	0.969228485	1.13845869	0.305544729	0.653598847	0.292999991	-0.151970907	0.287286409	1.4045201	0.230415265	3409.896629	1041.875943
1182	96.90415097	125	286	141.7498139	101	0.910443956	14.17498139	KRMEPIPIIITDTEIS	Kd	8205.640601	1312.937902	6.249831457	0.001536915	PIPIIITDTEIS	56	full	6458.189236	calibration2.csv	0.000121867	1.95E-05	0.125	8.205640601	1.312937902	2.456366033	-0.903089987	0.452970471	2.889182519	0.969228485	1.13845869	0.305544729	0.653598847	0.292999991	-0.151970907	0.287286409	1.4045201	0.230415265	3409.896629	1041.875943
1183	1265.611731	2000	1098.5	1136.867651	77	0.953353326	130.4076632	KRMEPIPIIITDTEIS	Kd	8205.640601	1312.937902	6.249831457	0.001536915	PIPIIITDTEIS	56	full	6458.189236	calibration2.csv	0.000121867	1.95E-05	2	8.205640601	1.312937902	3.040800061	0.301029996	0.452970471	2.889182519	0.969228485	1.13845869	0.305544729	0.653598847	0.292999991	-0.151970907	0.287286409	1.4045201	0.230415265	3409.896629	1041.875943
1184	190.9432277	250	367.5	219.6364904	113	0.867642839	20.75369759	KRMEPIPIIITDTEIS	Kd	8205.640601	1312.937902	6.249831457	0.001536915	PIPIIITDTEIS	56	full	6458.189236	calibration2.csv	0.000121867	1.95E-05	0.25	8.205640601	1.312937902	2.565257343	-0.602059991	0.452970471	2.889182519	0.969228485	1.13845869	0.305544729	0.653598847	0.292999991	-0.151970907	0.287286409	1.4045201	0.230415265	3409.896629	1041.875943
1185	370.9198169	500	640	482.1356442	85	0.829233115	52.60531155	KRMEPIPIIITDTEIS	Kd	8205.640601	1312.937902	6.249831457	0.001536915	PIPIIITDTEIS	56	full	6458.189236	calibration2.csv	0.000121867	1.95E-05	0.5	8.205640601	1.312937902	2.806179974	-0.301029996	0.452970471	2.889182519	0.969228485	1.13845869	0.305544729	0.653598847	0.292999991	-0.151970907	0.287286409	1.4045201	0.230415265	3409.896629	1041.875943
1186	49.20590234	63	239.5	174.4579419	114	2.929259206	16.41162266	KRMEPIPIIITDTEIS	Kd	8205.640601	1312.937902	6.249831457	0.001536915	PIPIIITDTEIS	56	full	6458.189236	calibration2.csv	0.000121867	1.95E-05	0.063	8.205640601	1.312937902	2.379305518	-1.200659451	0.452970471	2.889182519	0.969228485	1.13845869	0.305544729	0.653598847	0.292999991	-0.151970907	0.287286409	1.4045201	0.230415265	3409.896629	1041.875943
1187	583.4731186	1000	879.5	595.3252314	80	0.696806369	66.97932149	KRMEPIPIIITDTEIS	Kd	10068.52917	2464.686057	4.085116295	0.009492124	PIPIIITDTEIS	57	full	6458.189236	calibration2.csv	9.93E-05	2.43E-05	1	10.06852917	2.464686057	2.944235844	0	0.392583724	2.830316202	0.859934019	1.13845869	0.305544729	0.653598847	0.292999991	-0.151970907	0.287286409	1.4045201	0.230415265	3409.896629	1041.875943
1188	79.19471664	125	312.5	124.5490322	99	0.842928233	12.58135218	KRMEPIPIIITDTEIS	Kd	10068.52917	2464.686057	4.085116295	0.009492124	PIPIIITDTEIS	57	full	6458.189236	calibration2.csv	9.93E-05	2.43E-05	0.125	10.06852917	2.464686057	2.494850022	-0.903089987	0.392583724	2.830316202	0.859934019	1.13845869	0.305544729	0.653598847	0.292999991	-0.151970907	0.287286409	1.4045201	0.230415265	3409.896629	1041.875943
1189	1070.25291	2000	760.5	832.4003848	94	0.949058908	86.31589897	KRMEPIPIIITDTEIS	Kd	10068.52917	2464.686057	4.085116295	0.009492124	PIPIIITDTEIS	57	full	6458.189236	calibration2.csv	9.93E-05	2.43E-05	2	10.06852917	2.464686057	2.881099218	0.301029996	0.392583724	2.830316202	0.859934019	1.13845869	0.305544729	0.653598847	0.292999991	-0.151970907	0.287286409	1.4045201	0.230415265	3409.896629	1041.875943
1190	156.4706831	250	305.5	286.3183752	110	1.924535367	27.42432657	KRMEPIPIIITDTEIS	Kd	10068.52917	2464.686057	4.085116295	0.009492124	PIPIIITDTEIS	57	full	6458.189236	calibration2.csv	9.93E-05	2.43E-05	0.25	10.06852917	2.464686057	2.485011215	-0.602059991	0.392583724	2.830316202	0.859934019	1.13845869	0.305544729	0.653598847	0.292999991	-0.151970907	0.287286409	1.4045201	0.230415265	3409.896629	1041.875943
1191	305.5386956	500	548	437.1498486	99	0.953728941	44.15880319	KRMEPIPIIITDTEIS	Kd	10068.52917	2464.686057	4.085116295	0.009492124	PIPIIITDTEIS	57	full	6458.189236	calibration2.csv	9.93E-05	2.43E-05	0.5	10.06852917	2.464686057	2.738780558	-0.301029996	0.392583724	2.830316202	0.859934019	1.13845869	0.305544729	0.653598847	0.292999991	-0.151970907	0.287286409	1.4045201	0.230415265	3409.896629	1041.875943
1192	40.15839217	63	237.5	119.8662229	79	1.310013365	13.57217714	KRMEPIPIIITDTEIS	Kd	10068.52917	2464.686057	4.085116295	0.009492124	PIPIIITDTEIS	57	full	6458.189236	calibration2.csv	9.93E-05	2.43E-05	0.063	10.06852917	2.464686057	2.375663614	-1.200659451	0.392583724	2.830316202	0.859934019	1.13845869	0.305544729	0.653598847	0.292999991	-0.151970907	0.287286409	1.4045201	0.230415265	3409.896629	1041.875943
1193	5081.916339	1000	5401.75	2664.363519	96	0.508960063	273.3579293	KRMEPPAIIITDTEIS	Kd	270.8177004	43.86029716	6.174552338	0.00162318	PPAIIITDTEIS	58	full	6458.189236	calibration2.csv	0.003692521	0.000598022	1	0.2708177	0.043860297	3.732534481	0	0.360099792	3.666264357	0.868302663	-0.884342095	0.306570779	-1.369201938	0.294069814	-2.174771692	0.288377429	-0.618280686	0.231774147	112.5397039	34.50138472
1194	2039.508728	125	2340	1212.051948	87	0.523419021	130.6989228	KRMEPPAIIITDTEIS	Kd	270.8177004	43.86029716	6.174552338	0.00162318	PPAIIITDTEIS	58	full	6458.189236	calibration2.csv	0.003692521	0.000598022	0.125	0.2708177	0.043860297	3.369215857	-0.903089987	0.360099792	3.666264357	0.868302663	-0.884342095	0.306570779	-1.369201938	0.294069814	-2.174771692	0.288377429	-0.618280686	0.231774147	112.5397039	34.50138472
1195	5687.98564	2000	4716.5	4133.515277	103	0.689138332	409.2789995	KRMEPPAIIITDTEIS	Kd	270.8177004	43.86029716	6.174552338	0.00162318	PPAIIITDTEIS	58	full	6458.189236	calibration2.csv	0.003692521	0.000598022	2	0.2708177	0.043860297	3.673619839	0.301029996	0.360099792	3.666264357	0.868302663	-0.884342095	0.306570779	-1.369201938	0.294069814	-2.174771692	0.288377429	-0.618280686	0.231774147	112.5397039	34.50138472
1196	3100.023881	250	2936.75	826.9956634	96	0.287667863	84.84796479	KRMEPPAIIITDTEIS	Kd	270.8177004	43.86029716	6.174552338	0.00162318	PPAIIITDTEIS	58	full	6458.189236	calibration2.csv	0.003692521	0.000598022	0.25	0.2708177	0.043860297	3.467866977	-0.602059991	0.360099792	3.666264357	0.868302663	-0.884342095	0.306570779	-1.369201938	0.294069814	-2.174771692	0.288377429	-0.618280686	0.231774147	112.5397039	34.50138472
1197	4189.18068	500	4135.5	1773.156362	53	0.421608093	245.8925455	KRMEPPAIIITDTEIS	Kd	270.8177004	43.86029716	6.174552338	0.00162318	PPAIIITDTEIS	58	full	6458.189236	calibration2.csv	0.003692521	0.000598022	0.5	0.2708177	0.043860297	3.616528025	-0.301029996	0.360099792	3.666264357	0.868302663	-0.884342095	0.306570779	-1.369201938	0.294069814	-2.174771692	0.288377429	-0.618280686	0.231774147	112.5397039	34.50138472
1198	1218.826687	63	1457	436.5728163	104	0.346239313	43.0167978	KRMEPPAIIITDTEIS	Kd	270.8177004	43.86029716	6.174552338	0.00162318	PPAIIITDTEIS	58	full	6458.189236	calibration2.csv	0.003692521	0.000598022	0.063	0.2708177	0.043860297	3.163459552	-1.200659451	0.360099792	3.666264357	0.868302663	-0.884342095	0.306570779	-1.369201938	0.294069814	-2.174771692	0.288377429	-0.618280686	0.231774147	112.5397039	34.50138472
1199	4959.681368	1000	4461	2472.46029	106	0.497653094	241.2874178	KRMEPPAIIITDTEIS	Kd	302.1379313	36.00677063	8.391142166	0.000393808	PPAIIITDTEIS	59	full	6458.189236	calibration2.csv	0.003309747	0.000394433	1	0.302137931	0.036006771	3.649432223	0	0.371535703	3.658031836	0.915076991	-0.884342095	0.306570779	-1.369201938	0.294069814	-2.174771692	0.288377429	-0.618280686	0.231774147	112.5397039	34.50138472
1200	1889.960117	125	2347	1186.572218	117	0.518253423	110.1704647	KRMEPPAIIITDTEIS	Kd	302.1379313	36.00677063	8.391142166	0.000393808	PPAIIITDTEIS	59	full	6458.189236	calibration2.csv	0.003309747	0.000394433	0.125	0.302137931	0.036006771	3.37051309	-0.903089987	0.371535703	3.658031836	0.915076991	-0.884342095	0.306570779	-1.369201938	0.294069814	-2.174771692	0.288377429	-0.618280686	0.231774147	112.5397039	34.50138472
1201	5610.601475	2000	5230.5	5452.814898	97	0.761659543	556.5255901	KRMEPPAIIITDTEIS	Kd	302.1379313	36.00677063	8.391142166	0.000393808	PPAIIITDTEIS	59	full	6458.189236	calibration2.csv	0.003309747	0.000394433	2	0.302137931	0.036006771	3.718543206	0.301029996	0.371535703	3.658031836	0.915076991	-0.884342095	0.306570779	-1.369201938	0.294069814	-2.174771692	0.288377429	-0.618280686	0.231774147	112.5397039	34.50138472
1202	2924.173866	250	2894.75	1032.869146	100	0.374563837	103.807255	KRMEPPAIIITDTEIS	Kd	302.1379313	36.00677063	8.391142166	0.000393808	PPAIIITDTEIS	59	full	6458.189236	calibration2.csv	0.003309747	0.000394433	0.25	0.302137931	0.036006771	3.461611063	-0.602059991	0.371535703	3.658031836	0.915076991	-0.884342095	0.306570779	-1.369201938	0.294069814	-2.174771692	0.288377429	-0.618280686	0.231774147	112.5397039	34.50138472
1203	4025.610175	500	4067.5	1640.151452	94	0.393567181	170.0757828	KRMEPPAIIITDTEIS	Kd	302.1379313	36.00677063	8.391142166	0.000393808	PPAIIITDTEIS	59	full	6458.189236	calibration2.csv	0.003309747	0.000394433	0.5	0.302137931	0.036006771	3.609327562	-0.301029996	0.371535703	3.658031836	0.915076991	-0.884342095	0.306570779	-1.369201938	0.294069814	-2.174771692	0.288377429	-0.618280686	0.231774147	112.5397039	34.50138472
1204	1114.280076	63	1359.75	483.6311973	94	0.422630744	50.15021897	KRMEPPAIIITDTEIS	Kd	302.1379313	36.00677063	8.391142166	0.000393808	PPAIIITDTEIS	59	full	6458.189236	calibration2.csv	0.003309747	0.000394433	0.063	0.302137931	0.036006771	3.133459067	-1.200659451	0.371535703	3.658031836	0.915076991	-0.884342095	0.306570779	-1.369201938	0.294069814	-2.174771692	0.288377429	-0.618280686	0.231774147	112.5397039	34.50138472
1205	530.4566191	1000	719	709.2998694	122	1.306458483	64.48180631	KRMEPIAIYITDTEIS	Kd	11174.77359	2532.941514	4.411777188	0.006945043	PIAIYITDTEIS	60	full	6458.189236	calibration2.csv	8.95E-05	2.03E-05	1	11.17477359	2.532941514	2.85672889	0	0.411626884	2.797634877	0.925413584	1.321599081	0.345157483	0.836739238	0.334103428	0.031169484	0.329104219	1.58766049	0.280833225	4643.735284	1602.819982
1206	71.44157785	125	249	74.97647464	69	0.775793169	9.09223307	KRMEPIAIYITDTEIS	Kd	11174.77359	2532.941514	4.411777188	0.006945043	PIAIYITDTEIS	60	full	6458.189236	calibration2.csv	8.95E-05	2.03E-05	0.125	11.17477359	2.532941514	2.396199347	-0.903089987	0.411626884	2.797634877	0.925413584	1.321599081	0.345157483	0.836739238	0.334103428	0.031169484	0.329104219	1.58766049	0.280833225	4643.735284	1602.819982
1207	980.3871304	2000	732	1273.385293	90	1.825220401	134.9785711	KRMEPIAIYITDTEIS	Kd	11174.77359	2532.941514	4.411777188	0.006945043	PIAIYITDTEIS	60	full	6458.189236	calibration2.csv	8.95E-05	2.03E-05	2	11.17477359	2.532941514	2.864511081	0.301029996	0.411626884	2.797634877	0.925413584	1.321599081	0.345157483	0.836739238	0.334103428	0.031169484	0.329104219	1.58766049	0.280833225	4643.735284	1602.819982
1208	141.3198517	250	306	114.1922043	101	0.799931519	11.41922043	KRMEPIAIYITDTEIS	Kd	11174.77359	2532.941514	4.411777188	0.006945043	PIAIYITDTEIS	60	full	6458.189236	calibration2.csv	8.95E-05	2.03E-05	0.25	11.17477359	2.532941514	2.485721426	-0.602059991	0.411626884	2.797634877	0.925413584	1.321599081	0.345157483	0.836739238	0.334103428	0.031169484	0.329104219	1.58766049	0.280833225	4643.735284	1602.819982
1209	276.587344	500	552.75	223.1728197	88	0.534196718	23.92663774	KRMEPIAIYITDTEIS	Kd	11174.77359	2532.941514	4.411777188	0.006945043	PIAIYITDTEIS	60	full	6458.189236	calibration2.csv	8.95E-05	2.03E-05	0.5	11.17477359	2.532941514	2.742528751	-0.301029996	0.411626884	2.797634877	0.925413584	1.321599081	0.345157483	0.836739238	0.334103428	0.031169484	0.329104219	1.58766049	0.280833225	4643.735284	1602.819982
1210	36.20520726	63	212	45.81552252	113	0.884983597	4.329159956	KRMEPIAIYITDTEIS	Kd	11174.77359	2532.941514	4.411777188	0.006945043	PIAIYITDTEIS	60	full	6458.189236	calibration2.csv	8.95E-05	2.03E-05	0.063	11.17477359	2.532941514	2.326335861	-1.200659451	0.411626884	2.797634877	0.925413584	1.321599081	0.345157483	0.836739238	0.334103428	0.031169484	0.329104219	1.58766049	0.280833225	4643.735284	1602.819982
1211	546.8290928	1000	711	437.7780171	99	0.714280219	44.2222578	KRMEPIAIYITDTEIS	Kd	10810.25172	2103.351719	5.139535926	0.003646755	PIAIYITDTEIS	61	full	6458.189236	calibration2.csv	9.25E-05	1.80E-05	1	10.81025172	2.103351719	2.851869601	0	0.422707304	2.799853676	0.959483901	1.321599081	0.345157483	0.836739238	0.334103428	0.031169484	0.329104219	1.58766049	0.280833225	4643.735284	1602.819982
1212	73.8230518	125	257	87.59603618	99	0.78554351	8.848535884	KRMEPIAIYITDTEIS	Kd	10810.25172	2103.351719	5.139535926	0.003646755	PIAIYITDTEIS	61	full	6458.189236	calibration2.csv	9.25E-05	1.80E-05	0.125	10.81025172	2.103351719	2.409933123	-0.903089987	0.422707304	2.799853676	0.959483901	1.321599081	0.345157483	0.836739238	0.334103428	0.031169484	0.329104219	1.58766049	0.280833225	4643.735284	1602.819982
1213	1008.284517	2000	795	920.2173366	61	1.007832694	118.7995473	KRMEPIAIYITDTEIS	Kd	10810.25172	2103.351719	5.139535926	0.003646755	PIAIYITDTEIS	61	full	6458.189236	calibration2.csv	9.25E-05	1.80E-05	2	10.81025172	2.103351719	2.900367129	0.301029996	0.422707304	2.799853676	0.959483901	1.321599081	0.345157483	0.836739238	0.334103428	0.031169484	0.329104219	1.58766049	0.280833225	4643.735284	1602.819982
1214	145.9774469	250	300	136.8368761	81	0.910372646	15.29882784	KRMEPIAIYITDTEIS	Kd	10810.25172	2103.351719	5.139535926	0.003646755	PIAIYITDTEIS	61	full	6458.189236	calibration2.csv	9.25E-05	1.80E-05	0.25	10.81025172	2.103351719	2.477121255	-0.602059991	0.422707304	2.799853676	0.959483901	1.321599081	0.345157483	0.836739238	0.334103428	0.031169484	0.329104219	1.58766049	0.280833225	4643.735284	1602.819982
1215	285.5015694	500	496.5	389.993829	52	0.801267473	54.61005917	KRMEPIAIYITDTEIS	Kd	10810.25172	2103.351719	5.139535926	0.003646755	PIAIYITDTEIS	61	full	6458.189236	calibration2.csv	9.25E-05	1.80E-05	0.5	10.81025172	2.103351719	2.695919253	-0.301029996	0.422707304	2.799853676	0.959483901	1.321599081	0.345157483	0.836739238	0.334103428	0.031169484	0.329104219	1.58766049	0.280833225	4643.735284	1602.819982
1216	37.41897385	63	209	39.16688322	91	0.89451283	4.128551994	KRMEPIAIYITDTEIS	Kd	10810.25172	2103.351719	5.139535926	0.003646755	PIAIYITDTEIS	61	full	6458.189236	calibration2.csv	9.25E-05	1.80E-05	0.063	10.81025172	2.103351719	2.320146286	-1.200659451	0.422707304	2.799853676	0.959483901	1.321599081	0.345157483	0.836739238	0.334103428	0.031169484	0.329104219	1.58766049	0.280833225	4643.735284	1602.819982
1217	746.6116645	1000	716.5	217.0279164	106	0.392127757	21.17975595	KRMEPIAIIITRTEIS	Kd	7649.997774	986.2037731	7.757015317	0.000569442	PIAIIITRTEIS	62	full	6458.189236	calibration2.csv	0.000130719	1.69E-05	1	7.649997774	0.986203773	2.855216195	0	0.46388522	2.894915269	0.933350966	1.096879642	0.29047448	0.612019799	0.27724869	-0.193549955	0.27120347	1.362941051	0.210021513	3178.996362	923.4173147
1218	103.8294387	125	269.5	27.07324086	116	0.293820081	2.524592728	KRMEPIAIIITRTEIS	Kd	7649.997774	986.2037731	7.757015317	0.000569442	PIAIIITRTEIS	62	full	6458.189236	calibration2.csv	0.000130719	1.69E-05	0.125	7.649997774	0.986203773	2.43055877	-0.903089987	0.46388522	2.894915269	0.933350966	1.096879642	0.29047448	0.612019799	0.27724869	-0.193549955	0.27120347	1.362941051	0.210021513	3178.996362	923.4173147
1219	1338.485124	2000	1232.5	328.9802301	92	0.310433515	34.48649868	KRMEPIAIIITRTEIS	Kd	7649.997774	986.2037731	7.757015317	0.000569442	PIAIIITRTEIS	62	full	6458.189236	calibration2.csv	0.000130719	1.69E-05	2	7.649997774	0.986203773	3.090786928	0.301029996	0.46388522	2.894915269	0.933350966	1.096879642	0.29047448	0.612019799	0.27724869	-0.193549955	0.27120347	1.362941051	0.210021513	3178.996362	923.4173147
1220	204.3731347	250	348	40.68409411	93	0.238812179	4.241610023	KRMEPIAIIITRTEIS	Kd	7649.997774	986.2037731	7.757015317	0.000569442	PIAIIITRTEIS	62	full	6458.189236	calibration2.csv	0.000130719	1.69E-05	0.25	7.649997774	0.986203773	2.541579244	-0.602059991	0.46388522	2.894915269	0.933350966	1.096879642	0.29047448	0.612019799	0.27724869	-0.193549955	0.27120347	1.362941051	0.210021513	3178.996362	923.4173147
1221	396.2080368	500	600.75	80.21450508	58	0.194378161	10.62467075	KRMEPIAIIITRTEIS	Kd	7649.997774	986.2037731	7.757015317	0.000569442	PIAIIITRTEIS	62	full	6458.189236	calibration2.csv	0.000130719	1.69E-05	0.5	7.649997774	0.986203773	2.778693779	-0.301029996	0.46388522	2.894915269	0.933350966	1.096879642	0.29047448	0.612019799	0.27724869	-0.193549955	0.27120347	1.362941051	0.210021513	3178.996362	923.4173147
1222	52.75068576	63	261.5	35.91659865	101	0.414177823	3.591659865	KRMEPIAIIITRTEIS	Kd	7649.997774	986.2037731	7.757015317	0.000569442	PIAIIITRTEIS	62	full	6458.189236	calibration2.csv	0.000130719	1.69E-05	0.063	7.649997774	0.986203773	2.417471693	-1.200659451	0.46388522	2.894915269	0.933350966	1.096879642	0.29047448	0.612019799	0.27724869	-0.193549955	0.27120347	1.362941051	0.210021513	3178.996362	923.4173147
1223	738.4648352	1000	741.25	324.5321618	114	0.565849676	30.52941771	KRMEPIAIIITRTEIS	Kd	7745.425548	1007.791569	7.685543106	0.000594584	PIAIIITRTEIS	63	full	6458.189236	calibration2.csv	0.000129108	1.68E-05	1	7.745425548	1.007791569	2.869964706	0	0.452553303	2.891621371	0.938355153	1.096879642	0.29047448	0.612019799	0.27724869	-0.193549955	0.27120347	1.362941051	0.210021513	3178.996362	923.4173147
1224	102.5705217	125	273	25.31400757	115	0.263532419	2.370874032	KRMEPIAIIITRTEIS	Kd	7745.425548	1007.791569	7.685543106	0.000594584	PIAIIITRTEIS	63	full	6458.189236	calibration2.csv	0.000129108	1.68E-05	0.125	7.745425548	1.007791569	2.436162647	-0.903089987	0.452553303	2.891621371	0.938355153	1.096879642	0.29047448	0.612019799	0.27724869	-0.193549955	0.27120347	1.362941051	0.210021513	3178.996362	923.4173147
1225	1325.3786	2000	1206	253.8374078	93	0.234247515	26.46437917	KRMEPIAIIITRTEIS	Kd	7745.425548	1007.791569	7.685543106	0.000594584	PIAIIITRTEIS	63	full	6458.189236	calibration2.csv	0.000129108	1.68E-05	2	7.745425548	1.007791569	3.081347308	0.301029996	0.452553303	2.891621371	0.938355153	1.096879642	0.29047448	0.612019799	0.27724869	-0.193549955	0.27120347	1.362941051	0.210021513	3178.996362	923.4173147
1226	201.9338807	250	356.5	44.94683593	98	0.250678082	4.56365975	KRMEPIAIIITRTEIS	Kd	7745.425548	1007.791569	7.685543106	0.000594584	PIAIIITRTEIS	63	full	6458.189236	calibration2.csv	0.000129108	1.68E-05	0.25	7.745425548	1.007791569	2.552059534	-0.602059991	0.452553303	2.891621371	0.938355153	1.096879642	0.29047448	0.612019799	0.27724869	-0.193549955	0.27120347	1.362941051	0.210021513	3178.996362	923.4173147
1227	391.6225548	500	569	94.56621572	75	0.236364327	10.99309928	KRMEPIAIIITRTEIS	Kd	7745.425548	1007.791569	7.685543106	0.000594584	PIAIIITRTEIS	63	full	6458.189236	calibration2.csv	0.000129108	1.68E-05	0.5	7.745425548	1.007791569	2.755112266	-0.301029996	0.452553303	2.891621371	0.938355153	1.096879642	0.29047448	0.612019799	0.27724869	-0.193549955	0.27120347	1.362941051	0.210021513	3178.996362	923.4173147
1228	52.10601284	63	269.5	37.46252273	95	0.398024902	3.863964188	KRMEPIAIIITRTEIS	Kd	7745.425548	1007.791569	7.685543106	0.000594584	PIAIIITRTEIS	63	full	6458.189236	calibration2.csv	0.000129108	1.68E-05	0.063	7.745425548	1.007791569	2.43055877	-1.200659451	0.452553303	2.891621371	0.938355153	1.096879642	0.29047448	0.612019799	0.27724869	-0.193549955	0.27120347	1.362941051	0.210021513	3178.996362	923.4173147
1229	514.9164513	1000	569	251.3181538	83	0.690971952	27.75344725	KRMEPIAIIITKTEIS	Kd	11542.208	2082.474657	5.542544281	0.002624713	PIAIIITKTEIS	64	full	6458.189236	calibration2.csv	8.66E-05	1.56E-05	1	11.542208	2.082474657	2.755112266	0	0.371363556	2.761606311	0.911373406	1.340783638	0.316715171	0.855923795	0.30463078	0.050354041	0.299139429	1.606845047	0.245034919	4796.424564	1519.100424
1230	69.19167416	125	239	17.61239541	73	0.264249279	2.075640705	KRMEPIAIIITKTEIS	Kd	11542.208	2082.474657	5.542544281	0.002624713	PIAIIITKTEIS	64	full	6458.189236	calibration2.csv	8.66E-05	1.56E-05	0.125	11.542208	2.082474657	2.378397901	-0.903089987	0.371363556	2.761606311	0.911373406	1.340783638	0.316715171	0.855923795	0.30463078	0.050354041	0.299139429	1.606845047	0.245034919	4796.424564	1519.100424
1231	953.7867436	2000	812	180.5858686	69	0.272186481	21.89925326	KRMEPIAIIITKTEIS	Kd	11542.208	2082.474657	5.542544281	0.002624713	PIAIIITKTEIS	64	full	6458.189236	calibration2.csv	8.66E-05	1.56E-05	2	11.542208	2.082474657	2.909556029	0.301029996	0.371363556	2.761606311	0.911373406	1.340783638	0.316715171	0.855923795	0.30463078	0.050354041	0.299139429	1.606845047	0.245034919	4796.424564	1519.100424
1232	136.9164544	250	287.75	142.2516962	82	1.528585911	15.80574402	KRMEPIAIIITKTEIS	Kd	11542.208	2082.474657	5.542544281	0.002624713	PIAIIITKTEIS	64	full	6458.189236	calibration2.csv	8.66E-05	1.56E-05	0.25	11.542208	2.082474657	2.459015332	-0.602059991	0.371363556	2.761606311	0.911373406	1.340783638	0.316715171	0.855923795	0.30463078	0.050354041	0.299139429	1.606845047	0.245034919	4796.424564	1519.100424
1233	268.148052	500	464	66.1292129	88	0.234033932	7.089795807	KRMEPIAIIITKTEIS	Kd	11542.208	2082.474657	5.542544281	0.002624713	PIAIIITKTEIS	64	full	6458.189236	calibration2.csv	8.66E-05	1.56E-05	0.5	11.542208	2.082474657	2.666517981	-0.301029996	0.371363556	2.761606311	0.911373406	1.340783638	0.316715171	0.855923795	0.30463078	0.050354041	0.299139429	1.606845047	0.245034919	4796.424564	1519.100424
1234	35.05890819	63	249	328.6937502	62	9.617278203	42.08492223	KRMEPIAIIITKTEIS	Kd	11542.208	2082.474657	5.542544281	0.002624713	PIAIIITKTEIS	64	full	6458.189236	calibration2.csv	8.66E-05	1.56E-05	0.063	11.542208	2.082474657	2.396199347	-1.200659451	0.371363556	2.761606311	0.911373406	1.340783638	0.316715171	0.855923795	0.30463078	0.050354041	0.299139429	1.606845047	0.245034919	4796.424564	1519.100424
1235	512.4804531	1000	529.5	93.34448213	73	0.259843929	11.00075272	KRMEPIAIIITKTEIS	Kd	11601.82549	2120.300808	5.471782799	0.002777038	PIAIIITKTEIS	65	full	6458.189236	calibration2.csv	8.62E-05	1.58E-05	1	11.60182549	2.120300808	2.723865964	0	0.355985912	2.756713501	0.88726735	1.340783638	0.316715171	0.855923795	0.30463078	0.050354041	0.299139429	1.606845047	0.245034919	4796.424564	1519.100424
1236	68.8399137	125	238.75	37.62951156	74	0.610587404	4.404201202	KRMEPIAIIITKTEIS	Kd	11601.82549	2120.300808	5.471782799	0.002777038	PIAIIITKTEIS	65	full	6458.189236	calibration2.csv	8.62E-05	1.58E-05	0.125	11.60182549	2.120300808	2.37794338	-0.903089987	0.355985912	2.756713501	0.88726735	1.340783638	0.316715171	0.855923795	0.30463078	0.050354041	0.299139429	1.606845047	0.245034919	4796.424564	1519.100424
1237	949.6062484	2000	825.75	256.4059647	80	0.367870825	28.84792486	KRMEPIAIIITKTEIS	Kd	11601.82549	2120.300808	5.471782799	0.002777038	PIAIIITKTEIS	65	full	6458.189236	calibration2.csv	8.62E-05	1.58E-05	2	11.60182549	2.120300808	2.916848582	0.301029996	0.355985912	2.756713501	0.88726735	1.340783638	0.316715171	0.855923795	0.30463078	0.050354041	0.299139429	1.606845047	0.245034919	4796.424564	1519.100424
1238	136.2277322	250	297	109.5299761	79	1.04566382	12.40182764	KRMEPIAIIITKTEIS	Kd	11601.82549	2120.300808	5.471782799	0.002777038	PIAIIITKTEIS	65	full	6458.189236	calibration2.csv	8.62E-05	1.58E-05	0.25	11.60182549	2.120300808	2.472756449	-0.602059991	0.355985912	2.756713501	0.88726735	1.340783638	0.316715171	0.855923795	0.30463078	0.050354041	0.299139429	1.606845047	0.245034919	4796.424564	1519.100424
1239	266.8270685	500	468	147.0596985	82	0.517915918	16.3399665	KRMEPIAIIITKTEIS	Kd	11601.82549	2120.300808	5.471782799	0.002777038	PIAIIITKTEIS	65	full	6458.189236	calibration2.csv	8.62E-05	1.58E-05	0.5	11.60182549	2.120300808	2.670245853	-0.301029996	0.355985912	2.756713501	0.88726735	1.340783638	0.316715171	0.855923795	0.30463078	0.050354041	0.299139429	1.606845047	0.245034919	4796.424564	1519.100424
1240	34.87972643	63	260.25	40.31750741	64	0.465551732	5.079528481	KRMEPIAIIITKTEIS	Kd	11601.82549	2120.300808	5.471782799	0.002777038	PIAIIITKTEIS	65	full	6458.189236	calibration2.csv	8.62E-05	1.58E-05	0.063	11.60182549	2.120300808	2.415390738	-1.200659451	0.355985912	2.756713501	0.88726735	1.340783638	0.316715171	0.855923795	0.30463078	0.050354041	0.299139429	1.606845047	0.245034919	4796.424564	1519.100424
1241	2001.079895	1000	2078	1019.439538	80	0.514881456	114.695909	KRMEPIAIIITDTTIS	Kd	2227.352018	486.0230977	4.58281104	0.005932274	PIAIIITDTTIS	66	full	6458.189236	calibration2.csv	0.000448964	9.80E-05	1	2.227352018	0.486023098	3.317645543	0	0.440741179	3.302660012	0.946411277	0.365181738	0.339662123	-0.119678105	0.328423158	-0.925247859	0.323336136	0.631243147	0.274051036	925.5877153	314.3870885
1242	343.1772322	125	853.5	324.5419727	116	0.489919301	30.263695	KRMEPIAIIITDTTIS	Kd	2227.352018	486.0230977	4.58281104	0.005932274	PIAIIITDTTIS	66	full	6458.189236	calibration2.csv	0.000448964	9.80E-05	0.125	2.227352018	0.486023098	2.931203525	-0.903089987	0.440741179	3.302660012	0.946411277	0.365181738	0.339662123	-0.119678105	0.328423158	-0.925247859	0.323336136	0.631243147	0.274051036	925.5877153	314.3870885
1243	3055.43007	2000	2348.5	984.7429135	92	0.435971233	103.2291064	KRMEPIAIIITDTTIS	Kd	2227.352018	486.0230977	4.58281104	0.005932274	PIAIIITDTTIS	66	full	6458.189236	calibration2.csv	0.000448964	9.80E-05	2	2.227352018	0.486023098	3.370790565	0.301029996	0.440741179	3.302660012	0.946411277	0.365181738	0.339662123	-0.119678105	0.328423158	-0.925247859	0.323336136	0.631243147	0.274051036	925.5877153	314.3870885
1244	651.7230081	250	1135	397.1641792	93	0.418709721	41.40722806	KRMEPIAIIITDTTIS	Kd	2227.352018	486.0230977	4.58281104	0.005932274	PIAIIITDTTIS	66	full	6458.189236	calibration2.csv	0.000448964	9.80E-05	0.25	2.227352018	0.486023098	3.054995862	-0.602059991	0.440741179	3.302660012	0.946411277	0.365181738	0.339662123	-0.119678105	0.328423158	-0.925247859	0.323336136	0.631243147	0.274051036	925.5877153	314.3870885
1245	1183.966938	500	1726.5	641.2766811	61	0.430327852	82.78846355	KRMEPIAIIITDTTIS	Kd	2227.352018	486.0230977	4.58281104	0.005932274	PIAIIITDTTIS	66	full	6458.189236	calibration2.csv	0.000448964	9.80E-05	0.5	2.227352018	0.486023098	3.237166583	-0.301029996	0.440741179	3.302660012	0.946411277	0.365181738	0.339662123	-0.119678105	0.328423158	-0.925247859	0.323336136	0.631243147	0.274051036	925.5877153	314.3870885
1246	177.643401	63	514.75	183.6115855	106	0.536987076	17.91865597	KRMEPIAIIITDTTIS	Kd	2227.352018	486.0230977	4.58281104	0.005932274	PIAIIITDTTIS	66	full	6458.189236	calibration2.csv	0.000448964	9.80E-05	0.063	2.227352018	0.486023098	2.711596355	-1.200659451	0.440741179	3.302660012	0.946411277	0.365181738	0.339662123	-0.119678105	0.328423158	-0.925247859	0.323336136	0.631243147	0.274051036	925.5877153	314.3870885
1247	2008.857603	1000	2121	965.7985763	106	0.47466431	94.25229011	KRMEPIAIIITDTTIS	Kd	2214.856656	455.7901309	4.859378266	0.004635667	PIAIIITDTTIS	67	full	6458.189236	calibration2.csv	0.000451496	9.29E-05	1	2.214856656	0.455790131	3.326540669	0	0.473207561	3.304226716	0.949082783	0.365181738	0.339662123	-0.119678105	0.328423158	-0.925247859	0.323336136	0.631243147	0.274051036	925.5877153	314.3870885
1248	345.0098759	125	772	271.1763119	93	0.4513579	28.27208489	KRMEPIAIIITDTTIS	Kd	2214.856656	455.7901309	4.859378266	0.004635667	PIAIIITDTTIS	67	full	6458.189236	calibration2.csv	0.000451496	9.29E-05	0.125	2.214856656	0.455790131	2.8876173	-0.903089987	0.473207561	3.304226716	0.949082783	0.365181738	0.339662123	-0.119678105	0.328423158	-0.925247859	0.323336136	0.631243147	0.274051036	925.5877153	314.3870885
1249	3064.488196	2000	2364.75	1300.642675	106	0.531501844	126.9297281	KRMEPIAIIITDTTIS	Kd	2214.856656	455.7901309	4.859378266	0.004635667	PIAIIITDTTIS	67	full	6458.189236	calibration2.csv	0.000451496	9.29E-05	2	2.214856656	0.455790131	3.373785234	0.301029996	0.473207561	3.304226716	0.949082783	0.365181738	0.339662123	-0.119678105	0.328423158	-0.925247859	0.323336136	0.631243147	0.274051036	925.5877153	314.3870885
1250	655.0268572	250	1092	462.061792	106	0.517691669	45.09261365	KRMEPIAIIITDTTIS	Kd	2214.856656	455.7901309	4.859378266	0.004635667	PIAIIITDTTIS	67	full	6458.189236	calibration2.csv	0.000451496	9.29E-05	0.25	2.214856656	0.455790131	3.038222638	-0.602059991	0.473207561	3.304226716	0.949082783	0.365181738	0.339662123	-0.119678105	0.328423158	-0.925247859	0.323336136	0.631243147	0.274051036	925.5877153	314.3870885
1251	1189.416248	500	1728	763.7002248	75	0.499085234	88.77834784	KRMEPIAIIITDTTIS	Kd	2214.856656	455.7901309	4.859378266	0.004635667	PIAIIITDTTIS	67	full	6458.189236	calibration2.csv	0.000451496	9.29E-05	0.5	2.214856656	0.455790131	3.237543738	-0.301029996	0.473207561	3.304226716	0.949082783	0.365181738	0.339662123	-0.119678105	0.328423158	-0.925247859	0.323336136	0.631243147	0.274051036	925.5877153	314.3870885
1252	178.6178778	63	480	182.2790398	122	0.558597427	16.5708218	KRMEPIAIIITDTTIS	Kd	2214.856656	455.7901309	4.859378266	0.004635667	PIAIIITDTTIS	67	full	6458.189236	calibration2.csv	0.000451496	9.29E-05	0.063	2.214856656	0.455790131	2.681241237	-1.200659451	0.473207561	3.304226716	0.949082783	0.365181738	0.339662123	-0.119678105	0.328423158	-0.925247859	0.323336136	0.631243147	0.274051036	925.5877153	314.3870885
1253	879.604338	1000	1085.5	618.6229909	43	0.704619321	95.45559985	KRMEPIAIIITDYEIS	Kd	6342.152553	1306.444966	4.85451184	0.00465543	PIAIIITDYEIS	68	full	6458.189236	calibration2.csv	0.000157675	3.25E-05	1	6.342152553	1.306444966	3.035629828	0	0.489837159	2.994123757	0.920410612	0.985699776	0.331948343	0.500839933	0.320438942	-0.304729821	0.315223098	1.251761185	0.26443017	2635.514478	874.8546646
1254	124.826753	125	378.5	141.8764998	31	0.734927144	25.90298645	KRMEPIAIIITDYEIS	Kd	6342.152553	1306.444966	4.85451184	0.00465543	PIAIIITDYEIS	68	full	6458.189236	calibration2.csv	0.000157675	3.25E-05	0.125	6.342152553	1.306444966	2.578065884	-0.903089987	0.489837159	2.994123757	0.920410612	0.985699776	0.331948343	0.500839933	0.320438942	-0.304729821	0.315223098	1.251761185	0.26443017	2635.514478	874.8546646
1255	1548.326812	2000	1189.75	583.9401119	22	0.570443927	127.4261792	KRMEPIAIIITDYEIS	Kd	6342.152553	1306.444966	4.85451184	0.00465543	PIAIIITDYEIS	68	full	6458.189236	calibration2.csv	0.000157675	3.25E-05	2	6.342152553	1.306444966	3.075455713	0.301029996	0.489837159	2.994123757	0.920410612	0.985699776	0.331948343	0.500839933	0.320438942	-0.304729821	0.315223098	1.251761185	0.26443017	2635.514478	874.8546646
1256	244.9195913	250	408.75	198.3728857	26	0.821158259	39.67457714	KRMEPIAIIITDYEIS	Kd	6342.152553	1306.444966	4.85451184	0.00465543	PIAIIITDYEIS	68	full	6458.189236	calibration2.csv	0.000157675	3.25E-05	0.25	6.342152553	1.306444966	2.611457766	-0.602059991	0.489837159	2.994123757	0.920410612	0.985699776	0.331948343	0.500839933	0.320438942	-0.304729821	0.315223098	1.251761185	0.26443017	2635.514478	874.8546646
1257	471.9413361	500	894	698.0306193	27	1.008283047	136.8950673	KRMEPIAIIITDYEIS	Kd	6342.152553	1306.444966	4.85451184	0.00465543	PIAIIITDYEIS	68	full	6458.189236	calibration2.csv	0.000157675	3.25E-05	0.5	6.342152553	1.306444966	2.951337519	-0.301029996	0.489837159	2.994123757	0.920410612	0.985699776	0.331948343	0.500839933	0.320438942	-0.304729821	0.315223098	1.251761185	0.26443017	2635.514478	874.8546646
1258	63.52165986	63	244	76.56000811	27	1.196596364	15.0146529	KRMEPIAIIITDYEIS	Kd	6342.152553	1306.444966	4.85451184	0.00465543	PIAIIITDYEIS	68	full	6458.189236	calibration2.csv	0.000157675	3.25E-05	0.063	6.342152553	1.306444966	2.387389826	-1.200659451	0.489837159	2.994123757	0.920410612	0.985699776	0.331948343	0.500839933	0.320438942	-0.304729821	0.315223098	1.251761185	0.26443017	2635.514478	874.8546646
1259	1084.307257	1000	1299	585.9299984	130	0.537139169	51.58825981	KRMEPIAIIITDYEIS	Kd	4956.05092	869.861858	5.697514926	0.002324074	PIAIIITDYEIS	69	full	6458.189236	calibration2.csv	0.000201774	3.54E-05	1	4.95605092	0.869861858	3.113609151	0	0.517821975	3.072465138	0.976712995	0.985699776	0.331948343	0.500839933	0.320438942	-0.304729821	0.315223098	1.251761185	0.26443017	2635.514478	874.8546646
1260	158.8792687	125	379	132.9255347	99	0.571189198	13.42750672	KRMEPIAIIITDYEIS	Kd	4956.05092	869.861858	5.697514926	0.002324074	PIAIIITDYEIS	69	full	6458.189236	calibration2.csv	0.000201774	3.54E-05	0.125	4.95605092	0.869861858	2.57863921	-0.903089987	0.517821975	3.072465138	0.976712995	0.985699776	0.331948343	0.500839933	0.320438942	-0.304729821	0.315223098	1.251761185	0.26443017	2635.514478	874.8546646
1261	1856.855078	2000	1479	929.8905607	79	0.685130027	105.2893726	KRMEPIAIIITDYEIS	Kd	4956.05092	869.861858	5.697514926	0.002324074	PIAIIITDYEIS	69	full	6458.189236	calibration2.csv	0.000201774	3.54E-05	2	4.95605092	0.869861858	3.169968174	0.301029996	0.517821975	3.072465138	0.976712995	0.985699776	0.331948343	0.500839933	0.320438942	-0.304729821	0.315223098	1.251761185	0.26443017	2635.514478	874.8546646
1262	310.1289891	250	587.75	1116.928012	114	3.455025802	105.071749	KRMEPIAIIITDYEIS	Kd	4956.05092	869.861858	5.697514926	0.002324074	PIAIIITDYEIS	69	full	6458.189236	calibration2.csv	0.000201774	3.54E-05	0.25	4.95605092	0.869861858	2.769192638	-0.602059991	0.517821975	3.072465138	0.976712995	0.985699776	0.331948343	0.500839933	0.320438942	-0.304729821	0.315223098	1.251761185	0.26443017	2635.514478	874.8546646
1263	591.8373317	500	916.5	316.3450985	96	0.39683943	32.45632228	KRMEPIAIIITDYEIS	Kd	4956.05092	869.861858	5.697514926	0.002324074	PIAIIITDYEIS	69	full	6458.189236	calibration2.csv	0.000201774	3.54E-05	0.5	4.95605092	0.869861858	2.962132469	-0.301029996	0.517821975	3.072465138	0.976712995	0.985699776	0.331948343	0.500839933	0.320438942	-0.304729821	0.315223098	1.251761185	0.26443017	2635.514478	874.8546646
1264	81.06431442	63	275.5	115.2956096	98	0.916120302	11.70649551	KRMEPIAIIITDYEIS	Kd	4956.05092	869.861858	5.697514926	0.002324074	PIAIIITDYEIS	69	full	6458.189236	calibration2.csv	0.000201774	3.54E-05	0.063	4.95605092	0.869861858	2.440121603	-1.200659451	0.517821975	3.072465138	0.976712995	0.985699776	0.331948343	0.500839933	0.320438942	-0.304729821	0.315223098	1.251761185	0.26443017	2635.514478	874.8546646
1265	430.8448702	1000	506.5	410.6215576	110	1.344937212	39.33041211	MAGPHPVIVITGLHEE	Kd	13989.59297	2467.404953	5.669759619	0.002374817	HPVIVITGLH	71	full	6458.189236	calibration2.csv	7.15E-05	1.26E-05	1	13.98959297	2.467404953	2.70457945	0	0.404595423	2.694783061	0.956293144	1.497584555	0.326104425	1.012724712	0.314381152	0.207154958	0.309063092	1.763645965	0.257055847	6248.181851	2037.559752
1266	57.19425678	125	216.75	50.05588412	92	1.030809477	5.247282431	MAGPHPVIVITGLHEE	Kd	13989.59297	2467.404953	5.669759619	0.002374817	HPVIVITGLH	71	full	6458.189236	calibration2.csv	7.15E-05	1.26E-05	0.125	13.98959297	2.467404953	2.335959106	-0.903089987	0.404595423	2.694783061	0.956293144	1.497584555	0.326104425	1.012724712	0.314381152	0.207154958	0.309063092	1.763645965	0.257055847	6248.181851	2037.559752
1267	807.7990789	2000	676	572.0368879	77	0.961312113	65.61713122	MAGPHPVIVITGLHEE	Kd	13989.59297	2467.404953	5.669759619	0.002374817	HPVIVITGLH	71	full	6458.189236	calibration2.csv	7.15E-05	1.26E-05	2	13.98959297	2.467404953	2.829946696	0.301029996	0.404595423	2.694783061	0.956293144	1.497584555	0.326104425	1.012724712	0.314381152	0.207154958	0.309063092	1.763645965	0.257055847	6248.181851	2037.559752
1268	113.3843722	250	232	68.93827603	81	1.062303882	7.707533572	MAGPHPVIVITGLHEE	Kd	13989.59297	2467.404953	5.669759619	0.002374817	HPVIVITGLH	71	full	6458.189236	calibration2.csv	7.15E-05	1.26E-05	0.25	13.98959297	2.467404953	2.365487985	-0.602059991	0.404595423	2.694783061	0.956293144	1.497584555	0.326104425	1.012724712	0.314381152	0.207154958	0.309063092	1.763645965	0.257055847	6248.181851	2037.559752
1269	222.8561303	500	391.25	168.5796083	80	0.718908748	18.96668776	MAGPHPVIVITGLHEE	Kd	13989.59297	2467.404953	5.669759619	0.002374817	HPVIVITGLH	71	full	6458.189236	calibration2.csv	7.15E-05	1.26E-05	0.5	13.98959297	2.467404953	2.592454351	-0.301029996	0.404595423	2.694783061	0.956293144	1.497584555	0.326104425	1.012724712	0.314381152	0.207154958	0.309063092	1.763645965	0.257055847	6248.181851	2037.559752
1270	28.95308523	63	176	19.1264313	77	-7.552488259	2.193952137	MAGPHPVIVITGLHEE	Kd	13989.59297	2467.404953	5.669759619	0.002374817	HPVIVITGLH	71	full	6458.189236	calibration2.csv	7.15E-05	1.26E-05	0.063	13.98959297	2.467404953	2.245512668	-1.200659451	0.404595423	2.694783061	0.956293144	1.497584555	0.326104425	1.012724712	0.314381152	0.207154958	0.309063092	1.763645965	0.257055847	6248.181851	2037.559752
1271	556.6170874	1000	695	645.1038046	106	0.969785117	62.955685	ASGLSPRIEITPSHEL	Kd	10602.57093	2529.820968	4.191036069	0.008563233	SPRIEITPSHEL	77	full	6458.189236	calibration2.csv	9.43E-05	2.25E-05	1	10.60257093	2.529820968	2.841984805	0	0.378118488	2.824425166	0.943811179	1.290429597	0.353112306	0.805569754	0.342315226	0	0.337437698	1.556491006	0.290554493	4405.953493	1555.796399
1272	75.25223184	125	334	103.3547465	71	0.64153403	12.353255	ASGLSPRIEITPSHEL	Kd	10602.57093	2529.820968	4.191036069	0.008563233	SPRIEITPSHEL	77	full	6458.189236	calibration2.csv	9.43E-05	2.25E-05	0.125	10.60257093	2.529820968	2.523746467	-0.903089987	0.378118488	2.824425166	0.943811179	1.290429597	0.353112306	0.805569754	0.342315226	0	0.337437698	1.556491006	0.290554493	4405.953493	1555.796399
1273	1024.90028	2000	779.5	764.588387	99	0.935842914	77.23509046	ASGLSPRIEITPSHEL	Kd	10602.57093	2529.820968	4.191036069	0.008563233	SPRIEITPSHEL	77	full	6458.189236	calibration2.csv	9.43E-05	2.25E-05	2	10.60257093	2.529820968	2.89181612	0.301029996	0.378118488	2.824425166	0.943811179	1.290429597	0.353112306	0.805569754	0.342315226	0	0.337437698	1.556491006	0.290554493	4405.953493	1555.796399
1274	148.7709521	250	367.75	182.1945796	122	0.841848191	16.5631436	ASGLSPRIEITPSHEL	Kd	10602.57093	2529.820968	4.191036069	0.008563233	SPRIEITPSHEL	77	full	6458.189236	calibration2.csv	9.43E-05	2.25E-05	0.25	10.60257093	2.529820968	2.565552681	-0.602059991	0.378118488	2.824425166	0.943811179	1.290429597	0.353112306	0.805569754	0.342315226	0	0.337437698	1.556491006	0.290554493	4405.953493	1555.796399
1275	290.8420617	500	591.5	315.3109541	82	0.64242849	35.03455046	ASGLSPRIEITPSHEL	Kd	10602.57093	2529.820968	4.191036069	0.008563233	SPRIEITPSHEL	77	full	6458.189236	calibration2.csv	9.43E-05	2.25E-05	0.5	10.60257093	2.529820968	2.771954749	-0.301029996	0.378118488	2.824425166	0.943811179	1.290429597	0.353112306	0.805569754	0.342315226	0	0.337437698	1.556491006	0.290554493	4405.953493	1555.796399
1276	38.14759891	63	213	37.75463991	105	0.840147757	3.702147031	ASGLSPRIEITPSHEL	Kd	10602.57093	2529.820968	4.191036069	0.008563233	SPRIEITPSHEL	77	full	6458.189236	calibration2.csv	9.43E-05	2.25E-05	0.063	10.60257093	2.529820968	2.328379603	-1.200659451	0.378118488	2.824425166	0.943811179	1.290429597	0.353112306	0.805569754	0.342315226	0	0.337437698	1.556491006	0.290554493	4405.953493	1555.796399
1277	570.6328911	1000	741.5	541.0954592	92	0.74886472	56.72221651	ASGLSPRIEITPSHEL	Kd	10317.59024	2571.587842	4.012147697	0.010199792	SPRIEITPSHEL	78	full	6458.189236	calibration2.csv	9.69E-05	2.42E-05	1	10.31759024	2.571587842	2.870111155	0	0.394394171	2.83779598	0.921718607	1.290429597	0.353112306	0.805569754	0.342315226	0	0.337437698	1.556491006	0.290554493	4405.953493	1555.796399
1278	77.30588257	125	317	135.8299229	46	0.827134823	20.2483294	ASGLSPRIEITPSHEL	Kd	10317.59024	2571.587842	4.012147697	0.010199792	SPRIEITPSHEL	78	full	6458.189236	calibration2.csv	9.69E-05	2.42E-05	0.125	10.31759024	2.571587842	2.501059262	-0.903089987	0.394394171	2.83779598	0.921718607	1.290429597	0.353112306	0.805569754	0.342315226	0	0.337437698	1.556491006	0.290554493	4405.953493	1555.796399
1279	1048.61245	2000	771	1123.25237	92	1.136895111	117.7488427	ASGLSPRIEITPSHEL	Kd	10317.59024	2571.587842	4.012147697	0.010199792	SPRIEITPSHEL	78	full	6458.189236	calibration2.csv	9.69E-05	2.42E-05	2	10.31759024	2.571587842	2.887054378	0.301029996	0.394394171	2.83779598	0.921718607	1.290429597	0.353112306	0.805569754	0.342315226	0	0.337437698	1.556491006	0.290554493	4405.953493	1555.796399
1280	152.7829215	250	370	311.7691776	98	1.673195116	31.65536389	ASGLSPRIEITPSHEL	Kd	10317.59024	2571.587842	4.012147697	0.010199792	SPRIEITPSHEL	78	full	6458.189236	calibration2.csv	9.69E-05	2.42E-05	0.25	10.31759024	2.571587842	2.568201724	-0.602059991	0.394394171	2.83779598	0.921718607	1.290429597	0.353112306	0.805569754	0.342315226	0	0.337437698	1.556491006	0.290554493	4405.953493	1555.796399
1281	298.5040612	500	641	309.2806636	63	0.58765798	39.27868355	ASGLSPRIEITPSHEL	Kd	10317.59024	2571.587842	4.012147697	0.010199792	SPRIEITPSHEL	78	full	6458.189236	calibration2.csv	9.69E-05	2.42E-05	0.5	10.31759024	2.571587842	2.80685803	-0.301029996	0.394394171	2.83779598	0.921718607	1.290429597	0.353112306	0.805569754	0.342315226	0	0.337437698	1.556491006	0.290554493	4405.953493	1555.796399
1282	39.19487357	63	212	204.7870652	111	7.242747884	19.52568054	ASGLSPRIEITPSHEL	Kd	10317.59024	2571.587842	4.012147697	0.010199792	SPRIEITPSHEL	78	full	6458.189236	calibration2.csv	9.69E-05	2.42E-05	0.063	10.31759024	2.571587842	2.326335861	-1.200659451	0.394394171	2.83779598	0.921718607	1.290429597	0.353112306	0.805569754	0.342315226	0	0.337437698	1.556491006	0.290554493	4405.953493	1555.796399
1283	1755.378126	1000	2008	1362.234813	131	0.641966053	119.4758966	ASGLSPRILITPSHEL	Kd	2679.087225	637.9092885	4.199793408	0.008491249	SPRILITPSHEL	79	full	6458.189236	calibration2.csv	0.000373261	8.89E-05	1	2.679087225	0.637909289	3.302763708	0	0.401619318	3.25315712	0.917558353	0.474686721	0.352776304	-0.010173121	0.341968615	-0.815742876	0.337086072	0.740748131	0.290146055	1113.30863	392.7489038
1284	287.8917772	125	922.25	576.6925123	80	0.67374556	64.88297682	ASGLSPRILITPSHEL	Kd	2679.087225	637.9092885	4.199793408	0.008491249	SPRILITPSHEL	79	full	6458.189236	calibration2.csv	0.000373261	8.89E-05	0.125	2.679087225	0.637909289	2.964848664	-0.903089987	0.401619318	3.25315712	0.917558353	0.474686721	0.352776304	-0.010173121	0.341968615	-0.815742876	0.337086072	0.740748131	0.290146055	1113.30863	392.7489038
1285	2760.448321	2000	2043	2046.056136	83	0.871886984	225.9491015	ASGLSPRILITPSHEL	Kd	2679.087225	637.9092885	4.199793408	0.008491249	SPRILITPSHEL	79	full	6458.189236	calibration2.csv	0.000373261	8.89E-05	2	2.679087225	0.637909289	3.310268367	0.301029996	0.401619318	3.25315712	0.917558353	0.474686721	0.352776304	-0.010173121	0.341968615	-0.815742876	0.337086072	0.740748131	0.290146055	1113.30863	392.7489038
1286	551.2117548	250	987.5	510.7883923	107	0.57636165	49.61215441	ASGLSPRILITPSHEL	Kd	2679.087225	637.9092885	4.199793408	0.008491249	SPRILITPSHEL	79	full	6458.189236	calibration2.csv	0.000373261	8.89E-05	0.25	2.679087225	0.637909289	2.994537104	-0.602059991	0.401619318	3.25315712	0.917558353	0.474686721	0.352776304	-0.010173121	0.341968615	-0.815742876	0.337086072	0.740748131	0.290146055	1113.30863	392.7489038
1287	1015.730111	500	1442.5	884.2601187	74	0.621978507	103.4948187	ASGLSPRILITPSHEL	Kd	2679.087225	637.9092885	4.199793408	0.008491249	SPRILITPSHEL	79	full	6458.189236	calibration2.csv	0.000373261	8.89E-05	0.5	2.679087225	0.637909289	3.159115822	-0.301029996	0.401619318	3.25315712	0.917558353	0.474686721	0.352776304	-0.010173121	0.341968615	-0.815742876	0.337086072	0.740748131	0.290146055	1113.30863	392.7489038
1288	148.3781837	63	502	185.6114904	103	0.595807823	18.37827612	ASGLSPRILITPSHEL	Kd	2679.087225	637.9092885	4.199793408	0.008491249	SPRILITPSHEL	79	full	6458.189236	calibration2.csv	0.000373261	8.89E-05	0.063	2.679087225	0.637909289	2.700703717	-1.200659451	0.401619318	3.25315712	0.917558353	0.474686721	0.352776304	-0.010173121	0.341968615	-0.815742876	0.337086072	0.740748131	0.290146055	1113.30863	392.7489038
1289	1745.359654	1000	2027.25	1399.621213	122	0.643588896	127.2382921	ASGLSPRILITPSHEL	Kd	2700.205412	725.6323214	3.721175769	0.013695431	SPRILITPSHEL	80	full	6458.189236	calibration2.csv	0.000370342	9.95E-05	1	2.700205412	0.725632321	3.306907309	0	0.396930888	3.255267271	0.899949895	0.474686721	0.352776304	-0.010173121	0.341968615	-0.815742876	0.337086072	0.740748131	0.290146055	1113.30863	392.7489038
1290	285.7398089	125	813	424.7779476	115	0.603918578	39.78409987	ASGLSPRILITPSHEL	Kd	2700.205412	725.6323214	3.721175769	0.013695431	SPRILITPSHEL	80	full	6458.189236	calibration2.csv	0.000370342	9.95E-05	0.125	2.700205412	0.725632321	2.910090546	-0.903089987	0.396930888	3.255267271	0.899949895	0.474686721	0.352776304	-0.010173121	0.341968615	-0.815742876	0.337086072	0.740748131	0.290146055	1113.30863	392.7489038
1291	2748.04553	2000	1901	2052.221551	109	0.846364983	197.4751109	ASGLSPRILITPSHEL	Kd	2700.205412	725.6323214	3.721175769	0.013695431	SPRILITPSHEL	80	full	6458.189236	calibration2.csv	0.000370342	9.95E-05	2	2.700205412	0.725632321	3.278982117	0.301029996	0.396930888	3.255267271	0.899949895	0.474686721	0.352776304	-0.010173121	0.341968615	-0.815742876	0.337086072	0.740748131	0.290146055	1113.30863	392.7489038
1292	547.2660658	250	1111.5	498.4408877	111	0.559021719	47.52447394	ASGLSPRILITPSHEL	Kd	2700.205412	725.6323214	3.721175769	0.013695431	SPRILITPSHEL	80	full	6458.189236	calibration2.csv	0.000370342	9.95E-05	0.25	2.700205412	0.725632321	3.045909467	-0.602059991	0.396930888	3.255267271	0.899949895	0.474686721	0.352776304	-0.010173121	0.341968615	-0.815742876	0.337086072	0.740748131	0.290146055	1113.30863	392.7489038
1293	1009.027297	500	1594.5	787.3399473	73	0.531356928	92.78890264	ASGLSPRILITPSHEL	Kd	2700.205412	725.6323214	3.721175769	0.013695431	SPRILITPSHEL	80	full	6458.189236	calibration2.csv	0.000370342	9.95E-05	0.5	2.700205412	0.725632321	3.202624524	-0.301029996	0.396930888	3.255267271	0.899949895	0.474686721	0.352776304	-0.010173121	0.341968615	-0.815742876	0.337086072	0.740748131	0.290146055	1113.30863	392.7489038
1294	147.2441825	63	516.5	205.6326182	124	0.587305248	18.54126877	ASGLSPRILITPSHEL	Kd	2700.205412	725.6323214	3.721175769	0.013695431	SPRILITPSHEL	80	full	6458.189236	calibration2.csv	0.000370342	9.95E-05	0.063	2.700205412	0.725632321	2.713070326	-1.200659451	0.396930888	3.255267271	0.899949895	0.474686721	0.352776304	-0.010173121	0.341968615	-0.815742876	0.337086072	0.740748131	0.290146055	1113.30863	392.7489038
1295	175.1153136	1000	288	516.8188637	124	5.273227935	46.5999876	ASGLSPRIAITPSHEL	Kd	35879.63722	15218.82338	2.357582865	0.064945612	SPRIAITPSHEL	81	full	6458.189236	calibration2.csv	2.79E-05	1.18E-05	1	35.87963722	15.21882338	2.459392488	0	0.109673224	2.368927016	0.297878164	2.013340131	0.497665209	1.528480289	0.490063336	0.722910534	0.486668839	2.279401541	0.455416592	14909.96985	7420.17326
1296	22.42138005	125	184.5	62.82881041	124	3.06241057	5.665083053	ASGLSPRIAITPSHEL	Kd	35879.63722	15218.82338	2.357582865	0.064945612	SPRIAITPSHEL	81	full	6458.189236	calibration2.csv	2.79E-05	1.18E-05	0.125	35.87963722	15.21882338	2.26599637	-0.903089987	0.109673224	2.368927016	0.297878164	2.013340131	0.497665209	1.528480289	0.490063336	0.722910534	0.486668839	2.279401541	0.455416592	14909.96985	7420.17326
1297	340.9847459	2000	200.75	627.2207718	94	6.830254002	65.03976423	ASGLSPRIAITPSHEL	Kd	35879.63722	15218.82338	2.357582865	0.064945612	SPRIAITPSHEL	81	full	6458.189236	calibration2.csv	2.79E-05	1.18E-05	2	35.87963722	15.21882338	2.302655554	0.301029996	0.109673224	2.368927016	0.297878164	2.013340131	0.497665209	1.528480289	0.490063336	0.722910534	0.486668839	2.279401541	0.455416592	14909.96985	7420.17326
1298	44.68761475	250	186	46.81388997	93	2.987095552	4.880685418	ASGLSPRIAITPSHEL	Kd	35879.63722	15218.82338	2.357582865	0.064945612	SPRIAITPSHEL	81	full	6458.189236	calibration2.csv	2.79E-05	1.18E-05	0.25	35.87963722	15.21882338	2.269512944	-0.602059991	0.109673224	2.368927016	0.297878164	2.013340131	0.497665209	1.528480289	0.490063336	0.722910534	0.486668839	2.279401541	0.455416592	14909.96985	7420.17326
1299	88.76104505	500	253.75	165.9757306	92	1.665641365	17.39898416	ASGLSPRIAITPSHEL	Kd	35879.63722	15218.82338	2.357582865	0.064945612	SPRIAITPSHEL	81	full	6458.189236	calibration2.csv	2.79E-05	1.18E-05	0.5	35.87963722	15.21882338	2.404406051	-0.301029996	0.109673224	2.368927016	0.297878164	2.013340131	0.497665209	1.528480289	0.490063336	0.722910534	0.486668839	2.279401541	0.455416592	14909.96985	7420.17326
1300	11.31986836	63	164	498.0732264	123	-6.739975449	45.09343114	ASGLSPRIAITPSHEL	Kd	35879.63722	15218.82338	2.357582865	0.064945612	SPRIAITPSHEL	81	full	6458.189236	calibration2.csv	2.79E-05	1.18E-05	0.063	35.87963722	15.21882338	2.214843848	-1.200659451	0.109673224	2.368927016	0.297878164	2.013340131	0.497665209	1.528480289	0.490063336	0.722910534	0.486668839	2.279401541	0.455416592	14909.96985	7420.17326
1301	163.0122971	1000	270	196.1693843	74	1.305561151	22.95988978	ASGLSPRIAITPSHEL	Kd	38617.804	16998.51771	2.271833618	0.072272746	SPRIAITPSHEL	82	full	6458.189236	calibration2.csv	2.59E-05	1.14E-05	1	38.617804	16.99851771	2.431363764	0	0.082428202	2.338905869	0.172916493	2.013340131	0.497665209	1.528480289	0.490063336	0.722910534	0.486668839	2.279401541	0.455416592	14909.96985	7420.17326
1302	20.83673795	125	187.5	101.3047172	77	5.843043613	11.62044802	ASGLSPRIAITPSHEL	Kd	38617.804	16998.51771	2.271833618	0.072272746	SPRIAITPSHEL	82	full	6458.189236	calibration2.csv	2.59E-05	1.14E-05	0.125	38.617804	16.99851771	2.273001272	-0.903089987	0.082428202	2.338905869	0.172916493	2.013340131	0.497665209	1.528480289	0.490063336	0.722910534	0.486668839	2.279401541	0.455416592	14909.96985	7420.17326
1303	317.9979516	2000	186	236.647103	87	3.180888059	25.51831339	ASGLSPRIAITPSHEL	Kd	38617.804	16998.51771	2.271833618	0.072272746	SPRIAITPSHEL	82	full	6458.189236	calibration2.csv	2.59E-05	1.14E-05	2	38.617804	16.99851771	2.269512944	0.301029996	0.082428202	2.338905869	0.172916493	2.013340131	0.497665209	1.528480289	0.490063336	0.722910534	0.486668839	2.279401541	0.455416592	14909.96985	7420.17326
1304	41.53945278	250	185	59.56919123	79	6.299820759	6.744882717	ASGLSPRIAITPSHEL	Kd	38617.804	16998.51771	2.271833618	0.072272746	SPRIAITPSHEL	82	full	6458.189236	calibration2.csv	2.59E-05	1.14E-05	0.25	38.617804	16.99851771	2.267171728	-0.602059991	0.082428202	2.338905869	0.172916493	2.013340131	0.497665209	1.528480289	0.490063336	0.722910534	0.486668839	2.279401541	0.455416592	14909.96985	7420.17326
1305	82.54795227	500	229	138.3934658	90	2.104843587	14.66967804	ASGLSPRIAITPSHEL	Kd	38617.804	16998.51771	2.271833618	0.072272746	SPRIAITPSHEL	82	full	6458.189236	calibration2.csv	2.59E-05	1.14E-05	0.5	38.617804	16.99851771	2.359835482	-0.301029996	0.082428202	2.338905869	0.172916493	2.013340131	0.497665209	1.528480289	0.490063336	0.722910534	0.486668839	2.279401541	0.455416592	14909.96985	7420.17326
1306	10.51854873	63	162	60.30479476	118	-3.302072288	5.575180247	ASGLSPRIAITPSHEL	Kd	38617.804	16998.51771	2.271833618	0.072272746	SPRIAITPSHEL	82	full	6458.189236	calibration2.csv	2.59E-05	1.14E-05	0.063	38.617804	16.99851771	2.209515015	-1.200659451	0.082428202	2.338905869	0.172916493	2.013340131	0.497665209	1.528480289	0.490063336	0.722910534	0.486668839	2.279401541	0.455416592	14909.96985	7420.17326
1307	294.9924568	1000	454	586.1322668	97	2.068200432	59.82187398	ASGLSPRIEISPSHEL	Kd	20892.7267	6683.963089	3.125799234	0.026080817	SPRIEISPSHEL	83	full	6458.189236	calibration2.csv	4.79E-05	1.53E-05	1	20.8927267	6.683963089	2.657055853	0	0.250634059	2.576924898	0.831628387	1.692664214	0.412436471	1.207804371	0.40323102	0.402234617	0.399098661	1.958725623	0.360329648	8682.081241	3580.806947
1308	38.4091803	125	230.5	87.30648442	90	1.332923426	9.25446884	ASGLSPRIEISPSHEL	Kd	20892.7267	6683.963089	3.125799234	0.026080817	SPRIEISPSHEL	83	full	6458.189236	calibration2.csv	4.79E-05	1.53E-05	0.125	20.8927267	6.683963089	2.36267093	-0.903089987	0.250634059	2.576924898	0.831628387	1.692664214	0.412436471	1.207804371	0.40323102	0.402234617	0.399098661	1.958725623	0.360329648	8682.081241	3580.806947
1309	564.2131949	2000	375.75	347.733198	54	1.185865843	47.76482818	ASGLSPRIEISPSHEL	Kd	20892.7267	6683.963089	3.125799234	0.026080817	SPRIEISPSHEL	83	full	6458.189236	calibration2.csv	4.79E-05	1.53E-05	2	20.8927267	6.683963089	2.574898989	0.301029996	0.250634059	2.576924898	0.831628387	1.692664214	0.412436471	1.207804371	0.40323102	0.402234617	0.399098661	1.958725623	0.360329648	8682.081241	3580.806947
1310	76.3641952	250	249	139.6945693	105	1.524495118	13.69817952	ASGLSPRIEISPSHEL	Kd	20892.7267	6683.963089	3.125799234	0.026080817	SPRIEISPSHEL	83	full	6458.189236	calibration2.csv	4.79E-05	1.53E-05	0.25	20.8927267	6.683963089	2.396199347	-0.602059991	0.250634059	2.576924898	0.831628387	1.692664214	0.412436471	1.207804371	0.40323102	0.402234617	0.399098661	1.958725623	0.360329648	8682.081241	3580.806947
1311	150.9435736	500	346.5	298.7719467	62	1.214998078	38.25382786	ASGLSPRIEISPSHEL	Kd	20892.7267	6683.963089	3.125799234	0.026080817	SPRIEISPSHEL	83	full	6458.189236	calibration2.csv	4.79E-05	1.53E-05	0.5	20.8927267	6.683963089	2.539703239	-0.301029996	0.250634059	2.576924898	0.831628387	1.692664214	0.412436471	1.207804371	0.40323102	0.402234617	0.399098661	1.958725623	0.360329648	8682.081241	3580.806947
1312	19.41550048	63	179	165.5671034	117	6.370059553	15.37251963	ASGLSPRIEISPSHEL	Kd	20892.7267	6683.963089	3.125799234	0.026080817	SPRIEISPSHEL	83	full	6458.189236	calibration2.csv	4.79E-05	1.53E-05	0.063	20.8927267	6.683963089	2.252853031	-1.200659451	0.250634059	2.576924898	0.831628387	1.692664214	0.412436471	1.207804371	0.40323102	0.402234617	0.399098661	1.958725623	0.360329648	8682.081241	3580.806947
1313	312.4229883	1000	463	753.4408222	115	2.992167644	70.5661984	ASGLSPRIEISPSHEL	Kd	19671.29974	6059.895612	3.246144983	0.022793186	SPRIEISPSHEL	84	full	6458.189236	calibration2.csv	5.08E-05	1.57E-05	1	19.67129974	6.059895612	2.665580991	0	0.274775268	2.599755239	0.846514564	1.692664214	0.412436471	1.207804371	0.40323102	0.402234617	0.399098661	1.958725623	0.360329648	8682.081241	3580.806947
1314	40.77901755	125	220.5	100.8863509	103	1.576229677	9.989237248	ASGLSPRIEISPSHEL	Kd	19671.29974	6059.895612	3.246144983	0.022793186	SPRIEISPSHEL	84	full	6458.189236	calibration2.csv	5.08E-05	1.57E-05	0.125	19.67129974	6.059895612	2.343408594	-0.903089987	0.274775268	2.599755239	0.846514564	1.692664214	0.412436471	1.207804371	0.40323102	0.402234617	0.399098661	1.958725623	0.360329648	8682.081241	3580.806947
1315	596.0130969	2000	404	1205.731884	69	4.897742325	146.2164681	ASGLSPRIEISPSHEL	Kd	19671.29974	6059.895612	3.246144983	0.022793186	SPRIEISPSHEL	84	full	6458.189236	calibration2.csv	5.08E-05	1.57E-05	2	19.67129974	6.059895612	2.606381365	0.301029996	0.274775268	2.599755239	0.846514564	1.692664214	0.412436471	1.207804371	0.40323102	0.402234617	0.399098661	1.958725623	0.360329648	8682.081241	3580.806947
1316	81.04628363	250	247.5	153.5722099	74	2.172499242	17.97426763	ASGLSPRIEISPSHEL	Kd	19671.29974	6059.895612	3.246144983	0.022793186	SPRIEISPSHEL	84	full	6458.189236	calibration2.csv	5.08E-05	1.57E-05	0.25	19.67129974	6.059895612	2.393575203	-0.602059991	0.274775268	2.599755239	0.846514564	1.692664214	0.412436471	1.207804371	0.40323102	0.402234617	0.399098661	1.958725623	0.360329648	8682.081241	3580.806947
1317	160.0836168	500	385.5	398.7718772	65	1.401469155	49.84648465	ASGLSPRIEISPSHEL	Kd	19671.29974	6059.895612	3.246144983	0.022793186	SPRIEISPSHEL	84	full	6458.189236	calibration2.csv	5.08E-05	1.57E-05	0.5	19.67129974	6.059895612	2.586024382	-0.301029996	0.274775268	2.599755239	0.846514564	1.692664214	0.412436471	1.207804371	0.40323102	0.402234617	0.399098661	1.958725623	0.360329648	8682.081241	3580.806947
1318	20.61719581	63	182	69.99964358	97	13.17161092	7.144308706	ASGLSPRIEISPSHEL	Kd	19671.29974	6059.895612	3.246144983	0.022793186	SPRIEISPSHEL	84	full	6458.189236	calibration2.csv	5.08E-05	1.57E-05	0.063	19.67129974	6.059895612	2.260071388	-1.200659451	0.274775268	2.599755239	0.846514564	1.692664214	0.412436471	1.207804371	0.40323102	0.402234617	0.399098661	1.958725623	0.360329648	8682.081241	3580.806947
1319	318.915074	1000	465.5	508.6658407	84	1.750965295	55.83332958	ASGLSPRIEIFPSHEL	Kd	19250.49853	5220.97696	3.687144892	0.014187704	SPRIEIFPSHEL	85	full	6458.189236	calibration2.csv	5.19E-05	1.41E-05	1	19.25049853	5.22097696	2.667919685	0	0.29266837	2.596376952	0.901923923	1.644118781	0.375915486	1.159258938	0.365792107	0.353689184	0.361231715	1.910180191	0.317877438	7999.644784	3007.19036
1320	41.66466495	125	224.25	114.7413149	58	1.596113746	15.19785842	ASGLSPRIEIFPSHEL	Kd	19250.49853	5220.97696	3.687144892	0.014187704	SPRIEIFPSHEL	85	full	6458.189236	calibration2.csv	5.19E-05	1.41E-05	0.125	19.25049853	5.22097696	2.350732452	-0.903089987	0.29266837	2.596376952	0.901923923	1.644118781	0.375915486	1.159258938	0.365792107	0.353689184	0.361231715	1.910180191	0.317877438	7999.644784	3007.19036
1321	607.8153157	2000	437	429.4872136	34	1.10713562	74.76412741	ASGLSPRIEIFPSHEL	Kd	19250.49853	5220.97696	3.687144892	0.014187704	SPRIEIFPSHEL	85	full	6458.189236	calibration2.csv	5.19E-05	1.41E-05	2	19.25049853	5.22097696	2.640481437	0.301029996	0.29266837	2.596376952	0.901923923	1.644118781	0.375915486	1.159258938	0.365792107	0.353689184	0.361231715	1.910180191	0.317877438	7999.644784	3007.19036
1322	82.79518119	250	227.75	100.9834922	48	1.002628529	14.72995623	ASGLSPRIEIFPSHEL	Kd	19250.49853	5220.97696	3.687144892	0.014187704	SPRIEIFPSHEL	85	full	6458.189236	calibration2.csv	5.19E-05	1.41E-05	0.25	19.25049853	5.22097696	2.357458386	-0.602059991	0.29266837	2.596376952	0.901923923	1.644118781	0.375915486	1.159258938	0.365792107	0.353689184	0.361231715	1.910180191	0.317877438	7999.644784	3007.19036
1323	163.4943348	500	332.5	329.0942396	49	1.591317683	47.50066195	ASGLSPRIEIFPSHEL	Kd	19250.49853	5220.97696	3.687144892	0.014187704	SPRIEIFPSHEL	85	full	6458.189236	calibration2.csv	5.19E-05	1.41E-05	0.5	19.25049853	5.22097696	2.52179165	-0.301029996	0.29266837	2.596376952	0.901923923	1.644118781	0.375915486	1.159258938	0.365792107	0.353689184	0.361231715	1.910180191	0.317877438	7999.644784	3007.19036
1324	21.06640189	63	177	32.14139217	55	3.313545585	4.373889469	ASGLSPRIEIFPSHEL	Kd	19250.49853	5220.97696	3.687144892	0.014187704	SPRIEIFPSHEL	85	full	6458.189236	calibration2.csv	5.19E-05	1.41E-05	0.063	19.25049853	5.22097696	2.247973266	-1.200659451	0.29266837	2.596376952	0.901923923	1.644118781	0.375915486	1.159258938	0.365792107	0.353689184	0.361231715	1.910180191	0.317877438	7999.644784	3007.19036
1325	292.0213739	1000	443.75	312.1643695	92	1.162341023	32.72371751	ASGLSPRIEIFPSHEL	Kd	21115.46761	6732.074791	3.136546795	0.025766456	SPRIEIFPSHEL	86	full	6458.189236	calibration2.csv	4.74E-05	1.51E-05	1	21.11546761	6.732074791	2.647138366	0	0.247875511	2.570220695	0.791367311	1.644118781	0.375915486	1.159258938	0.365792107	0.353689184	0.361231715	1.910180191	0.317877438	7999.644784	3007.19036
1326	38.00639747	125	231	78.3947231	89	1.047381274	8.356905561	ASGLSPRIEIFPSHEL	Kd	21115.46761	6732.074791	3.136546795	0.025766456	SPRIEIFPSHEL	86	full	6458.189236	calibration2.csv	4.74E-05	1.51E-05	0.125	21.11546761	6.732074791	2.36361198	-0.903089987	0.247875511	2.570220695	0.791367311	1.644118781	0.375915486	1.159258938	0.365792107	0.353689184	0.361231715	1.910180191	0.317877438	7999.644784	3007.19036
1327	558.7764301	2000	374.25	502.6551106	62	1.421808333	64.35839205	ASGLSPRIEIFPSHEL	Kd	21115.46761	6732.074791	3.136546795	0.025766456	SPRIEIFPSHEL	86	full	6458.189236	calibration2.csv	4.74E-05	1.51E-05	2	21.11546761	6.732074791	2.573161809	0.301029996	0.247875511	2.570220695	0.791367311	1.644118781	0.375915486	1.159258938	0.365792107	0.353689184	0.361231715	1.910180191	0.317877438	7999.644784	3007.19036
1328	75.56807735	250	225	86.1651828	82	1.261704462	9.5739092	ASGLSPRIEIFPSHEL	Kd	21115.46761	6732.074791	3.136546795	0.025766456	SPRIEIFPSHEL	86	full	6458.189236	calibration2.csv	4.74E-05	1.51E-05	0.25	21.11546761	6.732074791	2.352182518	-0.602059991	0.247875511	2.570220695	0.791367311	1.644118781	0.375915486	1.159258938	0.365792107	0.353689184	0.361231715	1.910180191	0.317877438	7999.644784	3007.19036
1329	149.3881454	500	357	260.9362157	65	1.122566286	32.61702696	ASGLSPRIEIFPSHEL	Kd	21115.46761	6732.074791	3.136546795	0.025766456	SPRIEIFPSHEL	86	full	6458.189236	calibration2.csv	4.74E-05	1.51E-05	0.5	21.11546761	6.732074791	2.552668216	-0.301029996	0.247875511	2.570220695	0.791367311	1.644118781	0.375915486	1.159258938	0.365792107	0.353689184	0.361231715	1.910180191	0.317877438	7999.644784	3007.19036
1330	19.21130128	63	182.75	53.57393351	92	7.061320749	5.616074214	ASGLSPRIEIFPSHEL	Kd	21115.46761	6732.074791	3.136546795	0.025766456	SPRIEIFPSHEL	86	full	6458.189236	calibration2.csv	4.74E-05	1.51E-05	0.063	21.11546761	6.732074791	2.261857386	-1.200659451	0.247875511	2.570220695	0.791367311	1.644118781	0.375915486	1.159258938	0.365792107	0.353689184	0.361231715	1.910180191	0.317877438	7999.644784	3007.19036
1331	1797.268112	1000	2065	1618.923288	99	0.731444583	163.5359479	ASGLLPRIEITPSHEL	Kd	2593.336572	732.0156385	3.542733838	0.016514504	LPRIEITPSHEL	87	full	6458.189236	calibration2.csv	0.000385604	0.000108844	1	2.593336572	0.732015639	3.314920056	0	0.401059103	3.270050646	0.833702085	0.455395927	0.383967918	-0.029463916	0.374062528	-0.83503367	0.369604195	0.721457337	0.327360618	1077.6745	413.7924339
1332	296.9734001	125	941.25	451.6274262	70	0.550424734	54.36955298	ASGLLPRIEITPSHEL	Kd	2593.336572	732.0156385	3.542733838	0.016514504	LPRIEITPSHEL	87	full	6458.189236	calibration2.csv	0.000385604	0.000108844	0.125	2.593336572	0.732015639	2.973704989	-0.903089987	0.401059103	3.270050646	0.833702085	0.455395927	0.383967918	-0.029463916	0.374062528	-0.83503367	0.369604195	0.721457337	0.327360618	1077.6745	413.7924339
1333	2811.981719	2000	1922	2591.868911	73	0.947517386	305.4546805	ASGLLPRIEITPSHEL	Kd	2593.336572	732.0156385	3.542733838	0.016514504	LPRIEITPSHEL	87	full	6458.189236	calibration2.csv	0.000385604	0.000108844	2	2.593336572	0.732015639	3.283753383	0.301029996	0.401059103	3.270050646	0.833702085	0.455395927	0.383967918	-0.029463916	0.374062528	-0.83503367	0.369604195	0.721457337	0.327360618	1077.6745	413.7924339
1334	567.8354525	250	1221	598.1508187	73	0.529606658	70.49275001	ASGLLPRIEITPSHEL	Kd	2593.336572	732.0156385	3.542733838	0.016514504	LPRIEITPSHEL	87	full	6458.189236	calibration2.csv	0.000385604	0.000108844	0.25	2.593336572	0.732015639	3.086715664	-0.602059991	0.401059103	3.270050646	0.833702085	0.455395927	0.383967918	-0.029463916	0.374062528	-0.83503367	0.369604195	0.721457337	0.327360618	1077.6745	413.7924339
1335	1043.887253	500	1613	897.8139243	57	0.576715129	119.9754322	ASGLLPRIEITPSHEL	Kd	2593.336572	732.0156385	3.542733838	0.016514504	LPRIEITPSHEL	87	full	6458.189236	calibration2.csv	0.000385604	0.000108844	0.5	2.593336572	0.732015639	3.207634367	-0.301029996	0.401059103	3.270050646	0.833702085	0.455395927	0.383967918	-0.029463916	0.374062528	-0.83503367	0.369604195	0.721457337	0.327360618	1077.6745	413.7924339
1336	153.1680609	63	466	290.0576454	65	0.796222262	36.25720567	ASGLLPRIEITPSHEL	Kd	2593.336572	732.0156385	3.542733838	0.016514504	LPRIEITPSHEL	87	full	6458.189236	calibration2.csv	0.000385604	0.000108844	0.063	2.593336572	0.732015639	2.668385917	-1.200659451	0.401059103	3.270050646	0.833702085	0.455395927	0.383967918	-0.029463916	0.374062528	-0.83503367	0.369604195	0.721457337	0.327360618	1077.6745	413.7924339
1337	1955.285423	1000	2274	1429.415525	92	0.596956475	149.843462	ASGLLPRIEITPSHEL	Kd	2302.939387	590.7497337	3.898333348	0.011428472	LPRIEITPSHEL	88	full	6458.189236	calibration2.csv	0.000434228	0.000111388	1	2.302939387	0.590749734	3.35679046	0	0.434428202	3.297081498	0.8471835	0.455395927	0.383967918	-0.029463916	0.374062528	-0.83503367	0.369604195	0.721457337	0.327360618	1077.6745	413.7924339
1338	332.4933311	125	1006.5	707.5784008	59	0.742804983	92.90959578	ASGLLPRIEITPSHEL	Kd	2302.939387	590.7497337	3.898333348	0.011428472	LPRIEITPSHEL	88	full	6458.189236	calibration2.csv	0.000434228	0.000111388	0.125	2.302939387	0.590749734	3.002813779	-0.903089987	0.434428202	3.297081498	0.8471835	0.455395927	0.383967918	-0.029463916	0.374062528	-0.83503367	0.369604195	0.721457337	0.327360618	1077.6745	413.7924339
1339	3001.757011	2000	2115	2241.224165	48	0.842156534	326.9161438	ASGLLPRIEITPSHEL	Kd	2302.939387	590.7497337	3.898333348	0.011428472	LPRIEITPSHEL	88	full	6458.189236	calibration2.csv	0.000434228	0.000111388	2	2.302939387	0.590749734	3.325310372	0.301029996	0.434428202	3.297081498	0.8471835	0.455395927	0.383967918	-0.029463916	0.374062528	-0.83503367	0.369604195	0.721457337	0.327360618	1077.6745	413.7924339
1340	632.4268085	250	1162	542.8475325	73	0.493703723	63.97519523	ASGLLPRIEITPSHEL	Kd	2302.939387	590.7497337	3.898333348	0.011428472	LPRIEITPSHEL	88	full	6458.189236	calibration2.csv	0.000434228	0.000111388	0.25	2.302939387	0.590749734	3.065206128	-0.602059991	0.434428202	3.297081498	0.8471835	0.455395927	0.383967918	-0.029463916	0.374062528	-0.83503367	0.369604195	0.721457337	0.327360618	1077.6745	413.7924339
1341	1152.038689	500	1605.5	1028.588314	62	0.61170878	131.6972384	ASGLLPRIEITPSHEL	Kd	2302.939387	590.7497337	3.898333348	0.011428472	LPRIEITPSHEL	88	full	6458.189236	calibration2.csv	0.000434228	0.000111388	0.5	2.302939387	0.590749734	3.20561031	-0.301029996	0.434428202	3.297081498	0.8471835	0.455395927	0.383967918	-0.029463916	0.374062528	-0.83503367	0.369604195	0.721457337	0.327360618	1077.6745	413.7924339
1342	171.9680242	63	448	168.2833864	76	0.589651331	19.43169168	ASGLLPRIEITPSHEL	Kd	2302.939387	590.7497337	3.898333348	0.011428472	LPRIEITPSHEL	88	full	6458.189236	calibration2.csv	0.000434228	0.000111388	0.063	2.302939387	0.590749734	2.651278014	-1.200659451	0.434428202	3.297081498	0.8471835	0.455395927	0.383967918	-0.029463916	0.374062528	-0.83503367	0.369604195	0.721457337	0.327360618	1077.6745	413.7924339
1343	374.5244213	1000	549	1364.497709	95	4.81313242	140.7371927	ASGLSPRIEITPFHEL	Kd	16243.7066	4582.297922	3.544882257	0.016476841	SPRIEITPFHEL	89	full	6458.189236	calibration2.csv	6.16E-05	1.74E-05	1	16.2437066	4.582297922	2.739572344	0	0.316679322	2.670568844	0.9033955	1.543408755	0.383842174	1.058548912	0.373933454	0.252979158	0.369473563	1.809470164	0.327213122	6750.15676	2590.994849
1344	49.31810889	125	239.5	70.1863527	96	0.842288875	7.200967848	ASGLSPRIEITPFHEL	Kd	16243.7066	4582.297922	3.544882257	0.016476841	SPRIEITPFHEL	89	full	6458.189236	calibration2.csv	6.16E-05	1.74E-05	0.125	16.2437066	4.582297922	2.379305518	-0.903089987	0.316679322	2.670568844	0.9033955	1.543408755	0.383842174	1.058548912	0.373933454	0.252979158	0.369473563	1.809470164	0.327213122	6750.15676	2590.994849
1345	707.9909118	2000	493	907.1622864	91	1.507588331	95.62330108	ASGLSPRIEITPFHEL	Kd	16243.7066	4582.297922	3.544882257	0.016476841	SPRIEITPFHEL	89	full	6458.189236	calibration2.csv	6.16E-05	1.74E-05	2	16.2437066	4.582297922	2.692846919	0.301029996	0.316679322	2.670568844	0.9033955	1.543408755	0.383842174	1.058548912	0.373933454	0.252979158	0.369473563	1.809470164	0.327213122	6750.15676	2590.994849
1346	97.88868858	250	285	164.0720197	91	1.38412476	17.29470942	ASGLSPRIEITPFHEL	Kd	16243.7066	4582.297922	3.544882257	0.016476841	SPRIEITPFHEL	89	full	6458.189236	calibration2.csv	6.16E-05	1.74E-05	0.25	16.2437066	4.582297922	2.45484486	-0.602059991	0.316679322	2.670568844	0.9033955	1.543408755	0.383842174	1.058548912	0.373933454	0.252979158	0.369473563	1.809470164	0.327213122	6750.15676	2590.994849
1347	192.8542284	500	420.25	656.3415033	78	3.044219377	74.79705607	ASGLSPRIEITPFHEL	Kd	16243.7066	4582.297922	3.544882257	0.016476841	SPRIEITPFHEL	89	full	6458.189236	calibration2.csv	6.16E-05	1.74E-05	0.5	16.2437066	4.582297922	2.623507722	-0.301029996	0.316679322	2.670568844	0.9033955	1.543408755	0.383842174	1.058548912	0.373933454	0.252979158	0.369473563	1.809470164	0.327213122	6750.15676	2590.994849
1348	24.95083353	63	189	24.01227968	118	1.387925056	2.219936042	ASGLSPRIEITPFHEL	Kd	16243.7066	4582.297922	3.544882257	0.016476841	SPRIEITPFHEL	89	full	6458.189236	calibration2.csv	6.16E-05	1.74E-05	0.063	16.2437066	4.582297922	2.276461804	-1.200659451	0.316679322	2.670568844	0.9033955	1.543408755	0.383842174	1.058548912	0.373933454	0.252979158	0.369473563	1.809470164	0.327213122	6750.15676	2590.994849
1349	394.3666614	1000	578	314.1835175	67	0.664980672	38.67331761	ASGLSPRIEITPFHEL	Kd	15376.10343	4207.525065	3.654429431	0.014680114	SPRIEITPFHEL	90	full	6458.189236	calibration2.csv	6.50E-05	1.78E-05	1	15.37610343	4.207525065	2.761927838	0	0.330358524	2.688767179	0.899747937	1.543408755	0.383842174	1.058548912	0.373933454	0.252979158	0.369473563	1.809470164	0.327213122	6750.15676	2590.994849
1350	52.07846385	125	248.5	105.3756369	80	1.048644228	11.85568541	ASGLSPRIEITPFHEL	Kd	15376.10343	4207.525065	3.654429431	0.014680114	SPRIEITPFHEL	90	full	6458.189236	calibration2.csv	6.50E-05	1.78E-05	0.125	15.37610343	4.207525065	2.395326393	-0.903089987	0.330358524	2.688767179	0.899747937	1.543408755	0.383842174	1.058548912	0.373933454	0.252979158	0.369473563	1.809470164	0.327213122	6750.15676	2590.994849
1351	743.3414819	2000	521.5	586.512401	80	1.075220094	65.98780061	ASGLSPRIEITPFHEL	Kd	15376.10343	4207.525065	3.654429431	0.014680114	SPRIEITPFHEL	90	full	6458.189236	calibration2.csv	6.50E-05	1.78E-05	2	15.37610343	4.207525065	2.717254313	0.301029996	0.330358524	2.688767179	0.899747937	1.543408755	0.383842174	1.058548912	0.373933454	0.252979158	0.369473563	1.809470164	0.327213122	6750.15676	2590.994849
1352	103.3237311	250	278.25	105.917788	82	0.81121362	11.76864311	ASGLSPRIEITPFHEL	Kd	15376.10343	4207.525065	3.654429431	0.014680114	SPRIEITPFHEL	90	full	6458.189236	calibration2.csv	6.50E-05	1.78E-05	0.25	15.37610343	4.207525065	2.444435173	-0.602059991	0.330358524	2.688767179	0.899747937	1.543408755	0.383842174	1.058548912	0.373933454	0.252979158	0.369473563	1.809470164	0.327213122	6750.15676	2590.994849
1353	203.3933977	500	435.25	263.4497586	62	0.775753843	33.73128511	ASGLSPRIEITPFHEL	Kd	15376.10343	4207.525065	3.654429431	0.014680114	SPRIEITPFHEL	90	full	6458.189236	calibration2.csv	6.50E-05	1.78E-05	0.5	15.37610343	4.207525065	2.63873878	-0.301029996	0.330358524	2.688767179	0.899747937	1.543408755	0.383842174	1.058548912	0.373933454	0.252979158	0.369473563	1.809470164	0.327213122	6750.15676	2590.994849
1354	26.35295008	63	191	27.19645804	89	1.297499204	2.899152168	ASGLSPRIEITPFHEL	Kd	15376.10343	4207.525065	3.654429431	0.014680114	SPRIEITPFHEL	90	full	6458.189236	calibration2.csv	6.50E-05	1.78E-05	0.063	15.37610343	4.207525065	2.281033367	-1.200659451	0.330358524	2.688767179	0.899747937	1.543408755	0.383842174	1.058548912	0.373933454	0.252979158	0.369473563	1.809470164	0.327213122	6750.15676	2590.994849
1355	464.1177677	1000	750	417.6919953	78	0.67250778	47.60042057	ASGLSPRIEITASHEL	Kd	12914.97953	3844.26114	3.359547923	0.020117839	SPRIEITASHEL	91	full	6458.189236	calibration2.csv	7.74E-05	2.30E-05	1	12.91497953	3.84426114	2.875061263	0	0.346613119	2.758967553	0.837933416	1.407423355	0.395420205	0.922563512	0.385808957	0.116993758	0.381487926	1.673484765	0.340720929	5366.886913	2122.175525
1356	61.90758603	125	278.5	80.4501243	60	0.690262757	10.47371407	ASGLSPRIEITASHEL	Kd	12914.97953	3844.26114	3.359547923	0.020117839	SPRIEITASHEL	91	full	6458.189236	calibration2.csv	7.74E-05	2.30E-05	0.125	12.91497953	3.84426114	2.4448252	-0.903089987	0.346613119	2.758967553	0.837933416	1.407423355	0.395420205	0.922563512	0.385808957	0.116993758	0.381487926	1.673484765	0.340720929	5366.886913	2122.175525
1357	866.0004157	2000	564	476.9302974	80	0.857306455	53.65885072	ASGLSPRIEITASHEL	Kd	12914.97953	3844.26114	3.359547923	0.020117839	SPRIEITASHEL	91	full	6458.189236	calibration2.csv	7.74E-05	2.30E-05	2	12.91497953	3.84426114	2.751279104	0.301029996	0.346613119	2.758967553	0.837933416	1.407423355	0.395420205	0.922563512	0.385808957	0.116993758	0.381487926	1.673484765	0.340720929	5366.886913	2122.175525
1358	122.6395609	250	357.5	142.9015006	87	0.678477983	15.40946511	ASGLSPRIEITASHEL	Kd	12914.97953	3844.26114	3.359547923	0.020117839	SPRIEITASHEL	91	full	6458.189236	calibration2.csv	7.74E-05	2.30E-05	0.25	12.91497953	3.84426114	2.553276046	-0.602059991	0.346613119	2.758967553	0.837933416	1.407423355	0.395420205	0.922563512	0.385808957	0.116993758	0.381487926	1.673484765	0.340720929	5366.886913	2122.175525
1359	240.7081286	500	484.25	244.8223861	82	0.693691626	27.20248735	ASGLSPRIEITASHEL	Kd	12914.97953	3844.26114	3.359547923	0.020117839	SPRIEITASHEL	91	full	6458.189236	calibration2.csv	7.74E-05	2.30E-05	0.5	12.91497953	3.84426114	2.685069629	-0.301029996	0.346613119	2.758967553	0.837933416	1.407423355	0.395420205	0.922563512	0.385808957	0.116993758	0.381487926	1.673484765	0.340720929	5366.886913	2122.175525
1360	31.35048264	63	202.5	31.05000666	111	1.044092923	2.960501975	ASGLSPRIEITASHEL	Kd	12914.97953	3844.26114	3.359547923	0.020117839	SPRIEITASHEL	91	full	6458.189236	calibration2.csv	7.74E-05	2.30E-05	0.063	12.91497953	3.84426114	2.306425028	-1.200659451	0.346613119	2.758967553	0.837933416	1.407423355	0.395420205	0.922563512	0.385808957	0.116993758	0.381487926	1.673484765	0.340720929	5366.886913	2122.175525
1361	529.0946961	1000	687.5	317.9937487	95	0.578275593	32.79855086	ASGLSPRIEITASHEL	Kd	11206.11222	2433.268262	4.605374753	0.005811912	SPRIEITASHEL	92	full	6458.189236	calibration2.csv	8.92E-05	1.94E-05	1	11.20611222	2.433268262	2.837272703	0	0.408177339	2.798390173	0.970589262	1.407423355	0.395420205	0.922563512	0.385808957	0.116993758	0.381487926	1.673484765	0.340720929	5366.886913	2122.175525
1362	71.24399077	125	275	71.4643408	72	0.630876966	8.481256888	ASGLSPRIEITASHEL	Kd	11206.11222	2433.268262	4.605374753	0.005811912	SPRIEITASHEL	92	full	6458.189236	calibration2.csv	8.92E-05	1.94E-05	0.125	11.20611222	2.433268262	2.439332694	-0.903089987	0.408177339	2.798390173	0.970589262	1.407423355	0.395420205	0.922563512	0.385808957	0.116993758	0.381487926	1.673484765	0.340720929	5366.886913	2122.175525
1363	978.0606325	2000	751.5	558.0462277	58	0.88623636	73.91502853	ASGLSPRIEITASHEL	Kd	11206.11222	2433.268262	4.605374753	0.005811912	SPRIEITASHEL	92	full	6458.189236	calibration2.csv	8.92E-05	1.94E-05	2	11.20611222	2.433268262	2.875928985	0.301029996	0.408177339	2.798390173	0.970589262	1.407423355	0.395420205	0.922563512	0.385808957	0.116993758	0.381487926	1.673484765	0.340720929	5366.886913	2122.175525
1364	140.9332658	250	333.5	139.3496771	91	0.781127302	14.68874569	ASGLSPRIEITASHEL	Kd	11206.11222	2433.268262	4.605374753	0.005811912	SPRIEITASHEL	92	full	6458.189236	calibration2.csv	8.92E-05	1.94E-05	0.25	11.20611222	2.433268262	2.523095838	-0.602059991	0.408177339	2.798390173	0.970589262	1.407423355	0.395420205	0.922563512	0.385808957	0.116993758	0.381487926	1.673484765	0.340720929	5366.886913	2122.175525
1365	275.8468873	500	519.75	256.2480473	74	0.668665674	29.99156543	ASGLSPRIEITASHEL	Kd	11206.11222	2433.268262	4.605374753	0.005811912	SPRIEITASHEL	92	full	6458.189236	calibration2.csv	8.92E-05	1.94E-05	0.5	11.20611222	2.433268262	2.715794498	-0.301029996	0.408177339	2.798390173	0.970589262	1.407423355	0.395420205	0.922563512	0.385808957	0.116993758	0.381487926	1.673484765	0.340720929	5366.886913	2122.175525
1366	36.10452304	63	197	26.76170515	87	1.01915883	2.885788882	ASGLSPRIEITASHEL	Kd	11206.11222	2433.268262	4.605374753	0.005811912	SPRIEITASHEL	92	full	6458.189236	calibration2.csv	8.92E-05	1.94E-05	0.063	11.20611222	2.433268262	2.294466226	-1.200659451	0.408177339	2.798390173	0.970589262	1.407423355	0.395420205	0.922563512	0.385808957	0.116993758	0.381487926	1.673484765	0.340720929	5366.886913	2122.175525
1367	725.955233	1000	1058.5	660.4104835	77	0.69781136	75.75427787	ASGLSPRIEITPSSEL	Kd	7896.126017	1929.102081	4.093161318	0.009417623	SPRIEITPSSEL	93	full	6458.189236	calibration2.csv	0.000126644	3.09E-05	1	7.896126017	1.929102081	3.024690862	0	0.439498693	2.926951708	0.913744623	1.115658116	0.356992364	0.630798273	0.346316273	-0.174771481	0.341495896	1.381719526	0.295257787	3281.276233	1171.390561
1368	100.6434325	125	353	145.2514628	89	0.7132938	15.48385796	ASGLSPRIEITPSSEL	Kd	7896.126017	1929.102081	4.093161318	0.009417623	SPRIEITPSSEL	93	full	6458.189236	calibration2.csv	0.000126644	3.09E-05	0.125	7.896126017	1.929102081	2.547774705	-0.903089987	0.439498693	2.926951708	0.913744623	1.115658116	0.356992364	0.630798273	0.346316273	-0.174771481	0.341495896	1.381719526	0.295257787	3281.276233	1171.390561
1369	1305.195432	2000	919	1535.302298	84	1.219519371	168.5213206	ASGLSPRIEITPSSEL	Kd	7896.126017	1929.102081	4.093161318	0.009417623	SPRIEITPSSEL	93	full	6458.189236	calibration2.csv	0.000126644	3.09E-05	2	7.896126017	1.929102081	2.963315511	0.301029996	0.439498693	2.926951708	0.913744623	1.115658116	0.356992364	0.630798273	0.346316273	-0.174771481	0.341495896	1.381719526	0.295257787	3281.276233	1171.390561
1370	198.1981749	250	433	213.3530935	107	0.736020537	20.72268434	ASGLSPRIEITPSSEL	Kd	7896.126017	1929.102081	4.093161318	0.009417623	SPRIEITPSSEL	93	full	6458.189236	calibration2.csv	0.000126644	3.09E-05	0.25	7.896126017	1.929102081	2.636487896	-0.602059991	0.439498693	2.926951708	0.913744623	1.115658116	0.356992364	0.630798273	0.346316273	-0.174771481	0.341495896	1.381719526	0.295257787	3281.276233	1171.390561
1371	384.593396	500	685	490.8272848	81	0.802070087	54.8761587	ASGLSPRIEITPSSEL	Kd	7896.126017	1929.102081	4.093161318	0.009417623	SPRIEITPSSEL	93	full	6458.189236	calibration2.csv	0.000126644	3.09E-05	0.5	7.896126017	1.929102081	2.835690571	-0.301029996	0.439498693	2.926951708	0.913744623	1.115658116	0.356992364	0.630798273	0.346316273	-0.174771481	0.341495896	1.381719526	0.295257787	3281.276233	1171.390561
1372	51.11942203	63	231.5	53.23072788	101	0.805982088	5.323072788	ASGLSPRIEITPSSEL	Kd	7896.126017	1929.102081	4.093161318	0.009417623	SPRIEITPSSEL	93	full	6458.189236	calibration2.csv	0.000126644	3.09E-05	0.063	7.896126017	1.929102081	2.364550995	-1.200659451	0.439498693	2.926951708	0.913744623	1.115658116	0.356992364	0.630798273	0.346316273	-0.174771481	0.341495896	1.381719526	0.295257787	3281.276233	1171.390561
1373	730.708816	1000	815	760.8823612	69	1.080887815	92.27053953	ASGLSPRIEITPSSEL	Kd	7838.252796	1592.624755	4.921594226	0.004391434	SPRIEITPSSEL	94	full	6458.189236	calibration2.csv	0.000127579	2.59E-05	1	7.838252796	1.592624755	2.911157609	0	0.434163653	2.923442192	0.960953852	1.115658116	0.356992364	0.630798273	0.346316273	-0.174771481	0.341495896	1.381719526	0.295257787	3281.276233	1171.390561
1374	101.3748622	125	355.25	142.1525546	82	0.710611118	15.79472829	ASGLSPRIEITPSSEL	Kd	7838.252796	1592.624755	4.921594226	0.004391434	SPRIEITPSSEL	94	full	6458.189236	calibration2.csv	0.000127579	2.59E-05	0.125	7.838252796	1.592624755	2.550534087	-0.903089987	0.434163653	2.923442192	0.960953852	1.115658116	0.356992364	0.630798273	0.346316273	-0.174771481	0.341495896	1.381719526	0.295257787	3281.276233	1171.390561
1375	1312.873204	2000	1060.5	1368.963767	58	1.172724498	181.3236806	ASGLSPRIEITPSSEL	Kd	7838.252796	1592.624755	4.921594226	0.004391434	SPRIEITPSSEL	94	full	6458.189236	calibration2.csv	0.000127579	2.59E-05	2	7.838252796	1.592624755	3.025510673	0.301029996	0.434163653	2.923442192	0.960953852	1.115658116	0.356992364	0.630798273	0.346316273	-0.174771481	0.341495896	1.381719526	0.295257787	3281.276233	1171.390561
1376	199.6163263	250	424.5	176.8565663	64	0.645038908	22.28183296	ASGLSPRIEITPSSEL	Kd	7838.252796	1592.624755	4.921594226	0.004391434	SPRIEITPSSEL	94	full	6458.189236	calibration2.csv	0.000127579	2.59E-05	0.25	7.838252796	1.592624755	2.627877695	-0.602059991	0.434163653	2.923442192	0.960953852	1.115658116	0.356992364	0.630798273	0.346316273	-0.174771481	0.341495896	1.381719526	0.295257787	3281.276233	1171.390561
1377	387.2627392	500	747	336.1775669	71	0.53796897	40.18090458	ASGLSPRIEITPSSEL	Kd	7838.252796	1592.624755	4.921594226	0.004391434	SPRIEITPSSEL	94	full	6458.189236	calibration2.csv	0.000127579	2.59E-05	0.5	7.838252796	1.592624755	2.873320602	-0.301029996	0.434163653	2.923442192	0.960953852	1.115658116	0.356992364	0.630798273	0.346316273	-0.174771481	0.341495896	1.381719526	0.295257787	3281.276233	1171.390561
1378	51.49384944	63	238.5	49.64845583	90	0.717982008	5.262725793	ASGLSPRIEITPSSEL	Kd	7838.252796	1592.624755	4.921594226	0.004391434	SPRIEITPSSEL	94	full	6458.189236	calibration2.csv	0.000127579	2.59E-05	0.063	7.838252796	1.592624755	2.377488383	-1.200659451	0.434163653	2.923442192	0.960953852	1.115658116	0.356992364	0.630798273	0.346316273	-0.174771481	0.341495896	1.381719526	0.295257787	3281.276233	1171.390561
