# Supplementary material for: Quantitative mapping of protein-peptide affinity landscapes using spectrally encoded beads
Source: eLife journal article supplement (doi:10.7554/elife.40499), 2019-07-08
Supplement: supp [file elife-40499-supp-v1.zip › elife_poa_e40499_Figure_5_source_data_3.csv]

	.fitted	Conc	MED	SD	N	CV	SEM	full_sequence	term	kd_nM	kd_error	statistic	p.value	seq	seq_index	CVidx	Rmax	file	ka	ka_error	Conc_uM	kd_uM	kd_error_uM	MED_L10	Conc_L10	lm_x	lm_a	lm_r2	ddG_PVIVIT	ddGE_PVIVIT	ddG_PKIVIT	ddGE_PKIVIT	ddG_PRIEIT	ddGE_PRIEIT	ddG_IAIIIT	ddGE_IAIIIT	kd_true	kdE_true
1392	8.638742819	32	135	21.47385978	23	-0.241870115	4.578242289	SCRAMBLED	Kd	126779.5663	32179.90025	3.939712842	0.010963044	SCRAMBLED	1	full	34234.14086	full_calibration.csv	7.89E-06	2.00E-06	0.032	126.7795663	32.17990025	2.130333768	-1.494850022	0.269852232	2.54565623	0.972023827	1.405430139	0.256858543	1.286590319	0.256872481	-0.928304455	1.088262391	0.895185375	0.274617261	5348.877794	1373.904958
1393	17.00336833	63	175	39.17760349	13	-0.675475922	11.30959996	SCRAMBLED	Kd	126779.5663	32179.90025	3.939712842	0.010963044	SCRAMBLED	1	full	34234.14086	full_calibration.csv	7.89E-06	2.00E-06	0.063	126.7795663	32.17990025	2.243038049	-1.200659451	0.269852232	2.54565623	0.972023827	1.405430139	0.256858543	1.286590319	0.256872481	-0.928304455	1.088262391	0.895185375	0.274617261	5348.877794	1373.904958
1394	67.37435595	250	221.75	97.6318607	32	6.254693779	17.53519983	SCRAMBLED	Kd	126779.5663	32179.90025	3.939712842	0.010963044	SCRAMBLED	1	full	34234.14086	full_calibration.csv	7.89E-06	2.00E-06	0.25	126.7795663	32.17990025	2.345863629	-0.602059991	0.269852232	2.54565623	0.972023827	1.405430139	0.256858543	1.286590319	0.256872481	-0.928304455	1.088262391	0.895185375	0.274617261	5348.877794	1373.904958
1395	134.4840412	500	322	90.21579068	21	0.738464862	20.17286406	SCRAMBLED	Kd	126779.5663	32179.90025	3.939712842	0.010963044	SCRAMBLED	1	full	34234.14086	full_calibration.csv	7.89E-06	2.00E-06	0.5	126.7795663	32.17990025	2.507855872	-0.301029996	0.269852232	2.54565623	0.972023827	1.405430139	0.256858543	1.286590319	0.256872481	-0.928304455	1.088262391	0.895185375	0.274617261	5348.877794	1373.904958
1396	267.9156133	1000	343	480.2717752	30	2.016959929	89.18422971	SCRAMBLED	Kd	126779.5663	32179.90025	3.939712842	0.010963044	SCRAMBLED	1	full	34234.14086	full_calibration.csv	7.89E-06	2.00E-06	1	126.7795663	32.17990025	2.53529412	0	0.269852232	2.54565623	0.972023827	1.405430139	0.256858543	1.286590319	0.256872481	-0.928304455	1.088262391	0.895185375	0.274617261	5348.877794	1373.904958
1397	531.6703861	2000	418.5	224.9195756	27	0.883449017	44.11035789	SCRAMBLED	Kd	126779.5663	32179.90025	3.939712842	0.010963044	SCRAMBLED	1	full	34234.14086	full_calibration.csv	7.89E-06	2.00E-06	2	126.7795663	32.17990025	2.621695462	0.301029996	0.269852232	2.54565623	0.972023827	1.405430139	0.256858543	1.286590319	0.256872481	-0.928304455	1.088262391	0.895185375	0.274617261	5348.877794	1373.904958
1398	92.18955664	32	178	33.07001598	28	-0.663533104	6.364327542	MAGPHPVIVITGPHEE	Kd	11851.04345	466.4063774	25.40926545	2.45E-07	HPVIVITGPHEE	2	full	34234.14086	full_calibration.csv	8.44E-05	3.32E-06	0.032	11.85104345	0.466406377	2.250420002	-1.494850022	0.828725681	3.364826274	0.956426918	0	0.055657397	-0.11883982	0.055721685	-2.333734594	1.058978973	-0.510244764	0.111964614	500	27.82869826
1399	181.0259365	63	236.25	29.04516956	20	6.6388959	6.663418891	MAGPHPVIVITGPHEE	Kd	11851.04345	466.4063774	25.40926545	2.45E-07	HPVIVITGPHEE	2	full	34234.14086	full_calibration.csv	8.44E-05	3.32E-06	0.063	11.85104345	0.466406377	2.373371817	-1.200659451	0.828725681	3.364826274	0.956426918	0	0.055657397	-0.11883982	0.055721685	-2.333734594	1.058978973	-0.510244764	0.111964614	500	27.82869826
1400	357.318978	125	363	67.75221094	22	0.500436005	14.78474453	MAGPHPVIVITGPHEE	Kd	11851.04345	466.4063774	25.40926545	2.45E-07	HPVIVITGPHEE	2	full	34234.14086	full_calibration.csv	8.44E-05	3.32E-06	0.125	11.85104345	0.466406377	2.559906625	-0.903089987	0.828725681	3.364826274	0.956426918	0	0.055657397	-0.11883982	0.055721685	-2.333734594	1.058978973	-0.510244764	0.111964614	500	27.82869826
1401	707.2559691	250	474.5	123.0966298	17	0.560504274	30.77415746	MAGPHPVIVITGPHEE	Kd	11851.04345	466.4063774	25.40926545	2.45E-07	HPVIVITGPHEE	2	full	34234.14086	full_calibration.csv	8.44E-05	3.32E-06	0.25	11.85104345	0.466406377	2.676236217	-0.602059991	0.828725681	3.364826274	0.956426918	0	0.055657397	-0.11883982	0.055721685	-2.333734594	1.058978973	-0.510244764	0.111964614	500	27.82869826
1402	1385.880512	500	1357.5	322.7950969	26	0.281501057	64.55901937	MAGPHPVIVITGPHEE	Kd	11851.04345	466.4063774	25.40926545	2.45E-07	HPVIVITGPHEE	2	full	34234.14086	full_calibration.csv	8.44E-05	3.32E-06	0.5	11.85104345	0.466406377	3.132739838	-0.301029996	0.828725681	3.364826274	0.956426918	0	0.055657397	-0.11883982	0.055721685	-2.333734594	1.058978973	-0.510244764	0.111964614	500	27.82869826
1403	2663.919158	1000	2317.5	504.8731966	34	0.245947914	87.88714262	MAGPHPVIVITGPHEE	Kd	11851.04345	466.4063774	25.40926545	2.45E-07	HPVIVITGPHEE	2	full	34234.14086	full_calibration.csv	8.44E-05	3.32E-06	1	11.85104345	0.466406377	3.365019743	0	0.828725681	3.364826274	0.956426918	0	0.055657397	-0.11883982	0.055721685	-2.333734594	1.058978973	-0.510244764	0.111964614	500	27.82869826
1404	4943.185829	2000	5186.75	1287.247572	32	0.265276839	231.1964889	MAGPHPVIVITGPHEE	Kd	11851.04345	466.4063774	25.40926545	2.45E-07	HPVIVITGPHEE	2	full	34234.14086	full_calibration.csv	8.44E-05	3.32E-06	2	11.85104345	0.466406377	3.714895316	0.301029996	0.828725681	3.364826274	0.956426918	0	0.055657397	-0.11883982	0.055721685	-2.333734594	1.058978973	-0.510244764	0.111964614	500	27.82869826
1405	138.9360816	32	268	41.2306616	13	1.133189431	11.90226679	MAGPHPRIVITGPHEE	Kd	7852.866872	288.1519714	27.25251829	1.61E-07	HPRIVITGPHEE	3	full	34234.14086	full_calibration.csv	0.000127342	4.67E-06	0.032	7.852866872	0.288151971	2.428134794	-1.494850022	0.836302335	3.562722319	0.959961551	-0.244041587	0.053808104	-0.362881408	0.053874599	-2.577776181	1.058883389	-0.754286352	0.111056927	331.3154198	17.82745443
1406	272.459215	63	303.5	88.34564454	19	0.917249861	20.82326811	MAGPHPRIVITGPHEE	Kd	7852.866872	288.1519714	27.25251829	1.61E-07	HPRIVITGPHEE	3	full	34234.14086	full_calibration.csv	0.000127342	4.67E-06	0.063	7.852866872	0.288151971	2.482158695	-1.200659451	0.836302335	3.562722319	0.959961551	-0.244041587	0.053808104	-0.362881408	0.053874599	-2.577776181	1.058883389	-0.754286352	0.111056927	331.3154198	17.82745443
1407	536.3924562	125	669.5	194.5745253	34	0.506918038	33.87107727	MAGPHPRIVITGPHEE	Kd	7852.866872	288.1519714	27.25251829	1.61E-07	HPRIVITGPHEE	3	full	34234.14086	full_calibration.csv	0.000127342	4.67E-06	0.125	7.852866872	0.288151971	2.825750581	-0.903089987	0.836302335	3.562722319	0.959961551	-0.244041587	0.053808104	-0.362881408	0.053874599	-2.577776181	1.058883389	-0.754286352	0.111056927	331.3154198	17.82745443
1408	1056.235447	250	748.5	302.5927416	18	0.538208434	73.38951972	MAGPHPRIVITGPHEE	Kd	7852.866872	288.1519714	27.25251829	1.61E-07	HPRIVITGPHEE	3	full	34234.14086	full_calibration.csv	0.000127342	4.67E-06	0.25	7.852866872	0.288151971	2.874191805	-0.602059991	0.836302335	3.562722319	0.959961551	-0.244041587	0.053808104	-0.362881408	0.053874599	-2.577776181	1.058883389	-0.754286352	0.111056927	331.3154198	17.82745443
1409	2049.244971	500	2334	2732.571582	10	0.974352498	910.857194	MAGPHPRIVITGPHEE	Kd	7852.866872	288.1519714	27.25251829	1.61E-07	HPRIVITGPHEE	3	full	34234.14086	full_calibration.csv	0.000127342	4.67E-06	0.5	7.852866872	0.288151971	3.368100852	-0.301029996	0.836302335	3.562722319	0.959961551	-0.244041587	0.053808104	-0.362881408	0.053874599	-2.577776181	1.058883389	-0.754286352	0.111056927	331.3154198	17.82745443
1410	3867.011822	1000	4191.5	1552.654986	18	0.415639232	376.5741476	MAGPHPRIVITGPHEE	Kd	7852.866872	288.1519714	27.25251829	1.61E-07	HPRIVITGPHEE	3	full	34234.14086	full_calibration.csv	0.000127342	4.67E-06	1	7.852866872	0.288151971	3.62236947	0	0.836302335	3.562722319	0.959961551	-0.244041587	0.053808104	-0.362881408	0.053874599	-2.577776181	1.058883389	-0.754286352	0.111056927	331.3154198	17.82745443
1411	6949.072042	2000	6688.5	1799.598092	39	0.307689014	291.93336	MAGPHPRIVITGPHEE	Kd	7852.866872	288.1519714	27.25251829	1.61E-07	HPRIVITGPHEE	3	full	34234.14086	full_calibration.csv	0.000127342	4.67E-06	2	7.852866872	0.288151971	3.825328731	0.301029996	0.836302335	3.562722319	0.959961551	-0.244041587	0.053808104	-0.362881408	0.053874599	-2.577776181	1.058883389	-0.754286352	0.111056927	331.3154198	17.82745443
1412	193.4187561	32	201	27.75037241	39	-1.291485112	4.501704849	MAGPHPLIVITGPHEE	Kd	5631.838036	278.2912019	20.23721195	9.46E-07	HPLIVITGPHEE	4	full	34234.14086	full_calibration.csv	0.000177562	8.77E-06	0.032	5.631838036	0.278291202	2.303196057	-1.494850022	0.930338862	3.711336734	0.985171881	-0.441180174	0.063171263	-0.560019995	0.063227912	-2.774914768	1.059400457	-0.951424939	0.115883293	237.6093742	15.01008436
1413	378.7203184	63	424	82.09972035	35	0.426302235	14.07998588	MAGPHPLIVITGPHEE	Kd	5631.838036	278.2912019	20.23721195	9.46E-07	HPLIVITGPHEE	4	full	34234.14086	full_calibration.csv	0.000177562	8.77E-06	0.063	5.631838036	0.278291202	2.627365857	-1.200659451	0.930338862	3.711336734	0.985171881	-0.441180174	0.063171263	-0.560019995	0.063227912	-2.774914768	1.059400457	-0.951424939	0.115883293	237.6093742	15.01008436
1414	743.3364601	125	714	174.7038128	15	0.338792139	46.69155799	MAGPHPLIVITGPHEE	Kd	5631.838036	278.2912019	20.23721195	9.46E-07	HPLIVITGPHEE	4	full	34234.14086	full_calibration.csv	0.000177562	8.77E-06	0.125	5.631838036	0.278291202	2.853698212	-0.903089987	0.930338862	3.711336734	0.985171881	-0.441180174	0.063171263	-0.560019995	0.063227912	-2.774914768	1.059400457	-0.951424939	0.115883293	237.6093742	15.01008436
1415	1455.078355	250	1164.75	289.7585913	24	0.294090296	60.41884288	MAGPHPLIVITGPHEE	Kd	5631.838036	278.2912019	20.23721195	9.46E-07	HPLIVITGPHEE	4	full	34234.14086	full_calibration.csv	0.000177562	8.77E-06	0.25	5.631838036	0.278291202	3.066232719	-0.602059991	0.930338862	3.711336734	0.985171881	-0.441180174	0.063171263	-0.560019995	0.063227912	-2.774914768	1.059400457	-0.951424939	0.115883293	237.6093742	15.01008436
1416	2791.507265	500	3501.25	720.2407364	24	0.223826407	150.1805751	MAGPHPLIVITGPHEE	Kd	5631.838036	278.2912019	20.23721195	9.46E-07	HPLIVITGPHEE	4	full	34234.14086	full_calibration.csv	0.000177562	8.77E-06	0.5	5.631838036	0.278291202	3.544223122	-0.301029996	0.930338862	3.711336734	0.985171881	-0.441180174	0.063171263	-0.560019995	0.063227912	-2.774914768	1.059400457	-0.951424939	0.115883293	237.6093742	15.01008436
1417	5162.089404	1000	5614.5	1278.204826	49	0.231309987	184.4929751	MAGPHPLIVITGPHEE	Kd	5631.838036	278.2912019	20.23721195	9.46E-07	HPLIVITGPHEE	4	full	34234.14086	full_calibration.csv	0.000177562	8.77E-06	1	5.631838036	0.278291202	3.749311086	0	0.930338862	3.711336734	0.985171881	-0.441180174	0.063171263	-0.560019995	0.063227912	-2.774914768	1.059400457	-0.951424939	0.115883293	237.6093742	15.01008436
1418	8971.401305	2000	8458.5	2626.808867	38	0.296172106	431.8447176	MAGPHPLIVITGPHEE	Kd	5631.838036	278.2912019	20.23721195	9.46E-07	HPLIVITGPHEE	4	full	34234.14086	full_calibration.csv	0.000177562	8.77E-06	2	5.631838036	0.278291202	3.927293354	0.301029996	0.930338862	3.711336734	0.985171881	-0.441180174	0.063171263	-0.560019995	0.063227912	-2.774914768	1.059400457	-0.951424939	0.115883293	237.6093742	15.01008436
1419	6.059897058	32	141	15.18090906	25	-0.179868591	3.098790086	MAGPHPVIVIEGPHEE	Kd	180745.412	59874.12449	3.018756659	0.023434604	HPVIVIEGPHEE	5	full	34234.14086	full_calibration.csv	5.53E-06	1.83E-06	0.032	180.745412	59.87412449	2.149219113	-1.494850022	0.173264758	2.399058513	0.906884167	1.615731421	0.333591853	1.4968916	0.333602585	-0.718003173	1.108883332	1.105486656	0.347450505	7625.717211	2543.877132
1420	11.92837684	63	153.75	31.78458746	10	-0.472282132	10.59486249	MAGPHPVIVIEGPHEE	Kd	180745.412	59874.12449	3.018756659	0.023434604	HPVIVIEGPHEE	5	full	34234.14086	full_calibration.csv	5.53E-06	1.83E-06	0.063	180.745412	59.87412449	2.186815124	-1.200659451	0.173264758	2.399058513	0.906884167	1.615731421	0.333591853	1.4968916	0.333602585	-0.718003173	1.108883332	1.105486656	0.347450505	7625.717211	2543.877132
1421	23.65930148	125	168	28.22077028	20	-0.457201625	6.474288723	MAGPHPVIVIEGPHEE	Kd	180745.412	59874.12449	3.018756659	0.023434604	HPVIVIEGPHEE	5	full	34234.14086	full_calibration.csv	5.53E-06	1.83E-06	0.125	180.745412	59.87412449	2.225309282	-0.903089987	0.173264758	2.399058513	0.906884167	1.615731421	0.333591853	1.4968916	0.333602585	-0.718003173	1.108883332	1.105486656	0.347450505	7625.717211	2543.877132
1422	47.28592354	250	191.5	32.6959836	16	-0.735774596	8.442066665	MAGPHPVIVIEGPHEE	Kd	180745.412	59874.12449	3.018756659	0.023434604	HPVIVIEGPHEE	5	full	34234.14086	full_calibration.csv	5.53E-06	1.83E-06	0.25	180.745412	59.87412449	2.282168778	-0.602059991	0.173264758	2.399058513	0.906884167	1.615731421	0.333591853	1.4968916	0.333602585	-0.718003173	1.108883332	1.105486656	0.347450505	7625.717211	2543.877132
1423	94.44139985	500	225	43.41161811	27	-40.41771341	8.513718764	MAGPHPVIVIEGPHEE	Kd	180745.412	59874.12449	3.018756659	0.023434604	HPVIVIEGPHEE	5	full	34234.14086	full_calibration.csv	5.53E-06	1.83E-06	0.5	180.745412	59.87412449	2.352182518	-0.301029996	0.173264758	2.399058513	0.906884167	1.615731421	0.333591853	1.4968916	0.333602585	-0.718003173	1.108883332	1.105486656	0.347450505	7625.717211	2543.877132
1424	188.363164	1000	289.5	67.7590909	25	1.078279613	13.83126651	MAGPHPVIVIEGPHEE	Kd	180745.412	59874.12449	3.018756659	0.023434604	HPVIVIEGPHEE	5	full	34234.14086	full_calibration.csv	5.53E-06	1.83E-06	1	180.745412	59.87412449	2.461648568	0	0.173264758	2.399058513	0.906884167	1.615731421	0.333591853	1.4968916	0.333602585	-0.718003173	1.108883332	1.105486656	0.347450505	7625.717211	2543.877132
1425	374.6648463	2000	256	157.3030097	55	31.86617139	21.40622826	MAGPHPVIVIEGPHEE	Kd	180745.412	59874.12449	3.018756659	0.023434604	HPVIVIEGPHEE	5	full	34234.14086	full_calibration.csv	5.53E-06	1.83E-06	2	180.745412	59.87412449	2.408239965	0.301029996	0.173264758	2.399058513	0.906884167	1.615731421	0.333591853	1.4968916	0.333602585	-0.718003173	1.108883332	1.105486656	0.347450505	7625.717211	2543.877132
1426	25.58289748	32	181	24.24943298	20	-0.580129976	5.563201464	MAGPHPVIVLTGPHEE	Kd	42789.28356	3755.786493	11.39289564	2.74E-05	HPVIVLTGPHEE	6	full	34234.14086	full_calibration.csv	2.34E-05	2.05E-06	0.032	42.78928356	3.755786493	2.257678575	-1.494850022	0.492519958	2.918423774	0.951615732	0.761335959	0.096193283	0.642496138	0.096230494	-1.572398635	1.061881287	0.251091194	0.136716775	1805.296037	173.6573521
1427	50.32989365	63	217	29.02964384	19	-6.85171718	6.842352672	MAGPHPVIVLTGPHEE	Kd	42789.28356	3755.786493	11.39289564	2.74E-05	HPVIVLTGPHEE	6	full	34234.14086	full_calibration.csv	2.34E-05	2.05E-06	0.063	42.78928356	3.755786493	2.336459734	-1.200659451	0.492519958	2.918423774	0.951615732	0.761335959	0.096193283	0.642496138	0.096230494	-1.572398635	1.061881287	0.251091194	0.136716775	1805.296037	173.6573521
1428	99.71662701	125	273	27.71030398	13	0.579154263	7.999275732	MAGPHPVIVLTGPHEE	Kd	42789.28356	3755.786493	11.39289564	2.74E-05	HPVIVLTGPHEE	6	full	34234.14086	full_calibration.csv	2.34E-05	2.05E-06	0.125	42.78928356	3.755786493	2.436162647	-0.903089987	0.492519958	2.918423774	0.951615732	0.761335959	0.096193283	0.642496138	0.096230494	-1.572398635	1.061881287	0.251091194	0.136716775	1805.296037	173.6573521
1429	198.8540354	250	339	53.24419635	9	0.508702513	18.82466615	MAGPHPVIVLTGPHEE	Kd	42789.28356	3755.786493	11.39289564	2.74E-05	HPVIVLTGPHEE	6	full	34234.14086	full_calibration.csv	2.34E-05	2.05E-06	0.25	42.78928356	3.755786493	2.530199698	-0.602059991	0.492519958	2.918423774	0.951615732	0.761335959	0.096193283	0.642496138	0.096230494	-1.572398635	1.061881287	0.251091194	0.136716775	1805.296037	173.6573521
1430	395.4112663	500	559	128.6401119	19	0.331636652	30.32076516	MAGPHPVIVLTGPHEE	Kd	42789.28356	3755.786493	11.39289564	2.74E-05	HPVIVLTGPHEE	6	full	34234.14086	full_calibration.csv	2.34E-05	2.05E-06	0.5	42.78928356	3.755786493	2.747411808	-0.301029996	0.492519958	2.918423774	0.951615732	0.761335959	0.096193283	0.642496138	0.096230494	-1.572398635	1.061881287	0.251091194	0.136716775	1805.296037	173.6573521
1431	781.7926688	1000	779.25	186.112665	22	0.313213129	40.6131131	MAGPHPVIVLTGPHEE	Kd	42789.28356	3755.786493	11.39289564	2.74E-05	HPVIVLTGPHEE	6	full	34234.14086	full_calibration.csv	2.34E-05	2.05E-06	1	42.78928356	3.755786493	2.891676811	0	0.492519958	2.918423774	0.951615732	0.761335959	0.096193283	0.642496138	0.096230494	-1.572398635	1.061881287	0.251091194	0.136716775	1805.296037	173.6573521
1432	1528.675528	2000	1447	419.1240527	33	0.316780086	74.09136495	MAGPHPVIVLTGPHEE	Kd	42789.28356	3755.786493	11.39289564	2.74E-05	HPVIVLTGPHEE	6	full	34234.14086	full_calibration.csv	2.34E-05	2.05E-06	2	42.78928356	3.755786493	3.160468531	0.301029996	0.492519958	2.918423774	0.951615732	0.761335959	0.096193283	0.642496138	0.096230494	-1.572398635	1.061881287	0.251091194	0.136716775	1805.296037	173.6573521
1433	523.7318137	32	298	48.74245572	17	0.688796132	12.18561393	MAGPIPVIVITGPHEE	Kd	2059.705103	151.2492211	13.61795511	9.73E-06	IPVIVITGPHEE	7	full	34234.14086	full_calibration.csv	0.000485506	3.57E-05	0.032	2.059705103	0.151249221	2.474216264	-1.494850022	0.922881023	4.074070811	0.935155983	-1.037662888	0.083313862	-1.156502709	0.083356824	-3.371397482	1.060792119	-1.547907653	0.127982533	86.89973637	7.239952686
1434	1016.03886	63	1057.5	189.6156283	17	0.229232377	47.40390708	MAGPIPVIVITGPHEE	Kd	2059.705103	151.2492211	13.61795511	9.73E-06	IPVIVITGPHEE	7	full	34234.14086	full_calibration.csv	0.000485506	3.57E-05	0.063	2.059705103	0.151249221	3.024280376	-1.200659451	0.922881023	4.074070811	0.935155983	-1.037662888	0.083313862	-1.156502709	0.083356824	-3.371397482	1.060792119	-1.547907653	0.127982533	86.89973637	7.239952686
1435	1958.739237	125	2390	512.0329856	19	0.242969661	120.6873321	MAGPIPVIVITGPHEE	Kd	2059.705103	151.2492211	13.61795511	9.73E-06	IPVIVITGPHEE	7	full	34234.14086	full_calibration.csv	0.000485506	3.57E-05	0.125	2.059705103	0.151249221	3.378397901	-0.903089987	0.922881023	4.074070811	0.935155983	-1.037662888	0.083313862	-1.156502709	0.083356824	-3.371397482	1.060792119	-1.547907653	0.127982533	86.89973637	7.239952686
1436	3705.466643	250	3926	857.2856607	14	0.23099425	237.7682621	MAGPIPVIVITGPHEE	Kd	2059.705103	151.2492211	13.61795511	9.73E-06	IPVIVITGPHEE	7	full	34234.14086	full_calibration.csv	0.000485506	3.57E-05	0.25	2.059705103	0.151249221	3.593950295	-0.602059991	0.922881023	4.074070811	0.935155983	-1.037662888	0.083313862	-1.156502709	0.083356824	-3.371397482	1.060792119	-1.547907653	0.127982533	86.89973637	7.239952686
1437	6687.125954	500	8683.5	1781.949259	18	0.217214493	432.1861773	MAGPIPVIVITGPHEE	Kd	2059.705103	151.2492211	13.61795511	9.73E-06	IPVIVITGPHEE	7	full	34234.14086	full_calibration.csv	0.000485506	3.57E-05	0.5	2.059705103	0.151249221	3.938694809	-0.301029996	0.922881023	4.074070811	0.935155983	-1.037662888	0.083313862	-1.156502709	0.083356824	-3.371397482	1.060792119	-1.547907653	0.127982533	86.89973637	7.239952686
1438	11188.706	1000	10840.5	5788.1836	16	0.62383592	1494.502579	MAGPIPVIVITGPHEE	Kd	2059.705103	151.2492211	13.61795511	9.73E-06	IPVIVITGPHEE	7	full	34234.14086	full_calibration.csv	0.000485506	3.57E-05	1	2.059705103	0.151249221	4.035049314	0	0.922881023	4.074070811	0.935155983	-1.037662888	0.083313862	-1.156502709	0.083356824	-3.371397482	1.060792119	-1.547907653	0.127982533	86.89973637	7.239952686
1439	16865.33381	2000	15747	6129.388734	14	0.392193028	1699.986567	MAGPIPVIVITGPHEE	Kd	2059.705103	151.2492211	13.61795511	9.73E-06	IPVIVITGPHEE	7	full	34234.14086	full_calibration.csv	0.000485506	3.57E-05	2	2.059705103	0.151249221	4.197197827	0.301029996	0.922881023	4.074070811	0.935155983	-1.037662888	0.083313862	-1.156502709	0.083356824	-3.371397482	1.060792119	-1.547907653	0.127982533	86.89973637	7.239952686
1440	18.92899232	32	152.5	24.08857898	42	-0.318852921	3.762003998	MAGPHPVIVITGLHEE	Kd	57841.78898	5775.111212	10.01570132	5.74E-05	HPVIVITGLHEE	8	full	34234.14086	full_calibration.csv	1.73E-05	1.73E-06	0.032	57.84178898	5.775111212	2.183269844	-1.494850022	0.458169095	2.798134404	0.953185396	0.940080284	0.107319821	0.821240464	0.107353176	-1.39365431	1.062946971	0.42983552	0.144761435	2440.366927	261.8997428
1441	37.24650261	63	173.25	35.31389501	48	-0.725007254	5.151060995	MAGPHPVIVITGLHEE	Kd	57841.78898	5775.111212	10.01570132	5.74E-05	HPVIVITGLHEE	8	full	34234.14086	full_calibration.csv	1.73E-05	1.73E-06	0.063	57.84178898	5.775111212	2.238673243	-1.200659451	0.458169095	2.798134404	0.953185396	0.940080284	0.107319821	0.821240464	0.107353176	-1.39365431	1.062946971	0.42983552	0.144761435	2440.366927	261.8997428
1442	73.82274717	125	231	52.74109283	23	2.998875489	11.24443877	MAGPHPVIVITGLHEE	Kd	57841.78898	5775.111212	10.01570132	5.74E-05	HPVIVITGLHEE	8	full	34234.14086	full_calibration.csv	1.73E-05	1.73E-06	0.125	57.84178898	5.775111212	2.36361198	-0.903089987	0.458169095	2.798134404	0.953185396	0.940080284	0.107319821	0.821240464	0.107353176	-1.39365431	1.062946971	0.42983552	0.144761435	2440.366927	261.8997428
1443	147.3277956	250	301.25	46.63066935	28	0.588532225	8.9740765	MAGPHPVIVITGLHEE	Kd	57841.78898	5775.111212	10.01570132	5.74E-05	HPVIVITGLHEE	8	full	34234.14086	full_calibration.csv	1.73E-05	1.73E-06	0.25	57.84178898	5.775111212	2.478927056	-0.602059991	0.458169095	2.798134404	0.953185396	0.940080284	0.107319821	0.821240464	0.107353176	-1.39365431	1.062946971	0.42983552	0.144761435	2440.366927	261.8997428
1444	293.3929646	500	392.75	161.8972285	38	0.73056581	26.61574042	MAGPHPVIVITGLHEE	Kd	57841.78898	5775.111212	10.01570132	5.74E-05	HPVIVITGLHEE	8	full	34234.14086	full_calibration.csv	1.73E-05	1.73E-06	0.5	57.84178898	5.775111212	2.594116194	-0.301029996	0.458169095	2.798134404	0.953185396	0.940080284	0.107319821	0.821240464	0.107353176	-1.39365431	1.062946971	0.42983552	0.144761435	2440.366927	261.8997428
1445	581.7997965	1000	592	356.1116369	31	0.734617251	65.01679217	MAGPHPVIVITGLHEE	Kd	57841.78898	5775.111212	10.01570132	5.74E-05	HPVIVITGLHEE	8	full	34234.14086	full_calibration.csv	1.73E-05	1.73E-06	1	57.84178898	5.775111212	2.772321707	0	0.458169095	2.798134404	0.953185396	0.940080284	0.107319821	0.821240464	0.107353176	-1.39365431	1.062946971	0.42983552	0.144761435	2440.366927	261.8997428
1446	1144.154994	2000	1075	365.3285651	36	0.425260807	61.75179823	MAGPHPVIVITGLHEE	Kd	57841.78898	5775.111212	10.01570132	5.74E-05	HPVIVITGLHEE	8	full	34234.14086	full_calibration.csv	1.73E-05	1.73E-06	2	57.84178898	5.775111212	3.031408464	0.301029996	0.458169095	2.798134404	0.953185396	0.940080284	0.107319821	0.821240464	0.107353176	-1.39365431	1.062946971	0.42983552	0.144761435	2440.366927	261.8997428
1447	22.44780816	32	145	21.58435307	11	-0.271656618	6.825571753	MAGPHPVIVITMPHEE	Kd	48769.75828	3975.674207	12.26704094	1.79E-05	HPVIVITMPHEE	9	full	34234.14086	full_calibration.csv	2.05E-05	1.67E-06	0.032	48.76975828	3.975674207	2.161368002	-1.494850022	0.46108019	2.758762663	0.668158803	0.838913835	0.090522159	0.720074015	0.090561701	-1.494820758	1.06138258	0.328669071	0.132787764	2057.614525	186.2597097
1448	44.166067	63	212.5	35.16651239	8	-11.03263134	13.29169232	MAGPHPVIVITMPHEE	Kd	48769.75828	3975.674207	12.26704094	1.79E-05	HPVIVITMPHEE	9	full	34234.14086	full_calibration.csv	2.05E-05	1.67E-06	0.063	48.76975828	3.975674207	2.327358934	-1.200659451	0.46108019	2.758762663	0.668158803	0.838913835	0.090522159	0.720074015	0.090561701	-1.494820758	1.06138258	0.328669071	0.132787764	2057.614525	186.2597097
1449	87.51996652	125	204.25	28.44460334	32	-1.503265577	5.108801573	MAGPHPVIVITMPHEE	Kd	48769.75828	3975.674207	12.26704094	1.79E-05	HPVIVITMPHEE	9	full	34234.14086	full_calibration.csv	2.05E-05	1.67E-06	0.125	48.76975828	3.975674207	2.310162065	-0.903089987	0.46108019	2.758762663	0.668158803	0.838913835	0.090522159	0.720074015	0.090561701	-1.494820758	1.06138258	0.328669071	0.132787764	2057.614525	186.2597097
1450	174.5935826	250	218	3011.448058	17	-3.878967797	752.8620145	MAGPHPVIVITMPHEE	Kd	48769.75828	3975.674207	12.26704094	1.79E-05	HPVIVITMPHEE	9	full	34234.14086	full_calibration.csv	2.05E-05	1.67E-06	0.25	48.76975828	3.975674207	2.338456494	-0.602059991	0.46108019	2.758762663	0.668158803	0.838913835	0.090522159	0.720074015	0.090561701	-1.494820758	1.06138258	0.328669071	0.132787764	2057.614525	186.2597097
1451	347.4153523	500	204.5	3199.367743	11	2.99987599	1011.728914	MAGPHPVIVITMPHEE	Kd	48769.75828	3975.674207	12.26704094	1.79E-05	HPVIVITMPHEE	9	full	34234.14086	full_calibration.csv	2.05E-05	1.67E-06	0.5	48.76975828	3.975674207	2.310693312	-0.301029996	0.46108019	2.758762663	0.668158803	0.838913835	0.090522159	0.720074015	0.090561701	-1.494820758	1.06138258	0.328669071	0.132787764	2057.614525	186.2597097
1452	687.8502537	1000	598	172.0011919	10	0.438554798	57.33373062	MAGPHPVIVITMPHEE	Kd	48769.75828	3975.674207	12.26704094	1.79E-05	HPVIVITMPHEE	9	full	34234.14086	full_calibration.csv	2.05E-05	1.67E-06	1	48.76975828	3.975674207	2.776701184	0	0.46108019	2.758762663	0.668158803	0.838913835	0.090522159	0.720074015	0.090561701	-1.494820758	1.06138258	0.328669071	0.132787764	2057.614525	186.2597097
1453	1348.603658	2000	1411.75	1091.246356	10	0.67960787	363.7487854	MAGPHPVIVITMPHEE	Kd	48769.75828	3975.674207	12.26704094	1.79E-05	HPVIVITMPHEE	9	full	34234.14086	full_calibration.csv	2.05E-05	1.67E-06	2	48.76975828	3.975674207	3.149757796	0.301029996	0.46108019	2.758762663	0.668158803	0.838913835	0.090522159	0.720074015	0.090561701	-1.494820758	1.06138258	0.328669071	0.132787764	2057.614525	186.2597097
1454	75.48482104	32	174.5	30.14078536	11	-0.483659575	9.531353221	MAGPHPKIVITGPHEE	Kd	14480.75226	571.2162593	25.35073543	2.48E-07	HPKIVITGPHEE	10	full	34234.14086	full_calibration.csv	6.91E-05	2.72E-06	0.032	14.48075226	0.571216259	2.241795431	-1.494850022	0.810382844	3.321793429	0.963310305	0.11883982	0.055721685	0	0.055785899	-2.214894773	1.058982354	-0.391404944	0.111996585	610.9484081	34.04307458
1455	148.2939777	63	220.5	54.90586252	19	-15.11900562	12.94143591	MAGPHPKIVITGPHEE	Kd	14480.75226	571.2162593	25.35073543	2.48E-07	HPKIVITGPHEE	10	full	34234.14086	full_calibration.csv	6.91E-05	2.72E-06	0.063	14.48075226	0.571216259	2.343408594	-1.200659451	0.810382844	3.321793429	0.963310305	0.11883982	0.055721685	0	0.055785899	-2.214894773	1.058982354	-0.391404944	0.111996585	610.9484081	34.04307458
1456	292.9850877	125	287.5	116.6917908	17	1.175561745	29.17294771	MAGPHPKIVITGPHEE	Kd	14480.75226	571.2162593	25.35073543	2.48E-07	HPKIVITGPHEE	10	full	34234.14086	full_calibration.csv	6.91E-05	2.72E-06	0.125	14.48075226	0.571216259	2.458637849	-0.903089987	0.810382844	3.321793429	0.963310305	0.11883982	0.055721685	0	0.055785899	-2.214894773	1.058982354	-0.391404944	0.111996585	610.9484081	34.04307458
1457	580.9978378	250	551.5	160.2150995	19	0.558701825	37.76306111	MAGPHPKIVITGPHEE	Kd	14480.75226	571.2162593	25.35073543	2.48E-07	HPKIVITGPHEE	10	full	34234.14086	full_calibration.csv	6.91E-05	2.72E-06	0.25	14.48075226	0.571216259	2.741545517	-0.602059991	0.810382844	3.321793429	0.963310305	0.11883982	0.055721685	0	0.055785899	-2.214894773	1.058982354	-0.391404944	0.111996585	610.9484081	34.04307458
1458	1142.604198	500	1140	361.3998012	7	0.36618638	147.540851	MAGPHPKIVITGPHEE	Kd	14480.75226	571.2162593	25.35073543	2.48E-07	HPKIVITGPHEE	10	full	34234.14086	full_calibration.csv	6.91E-05	2.72E-06	0.5	14.48075226	0.571216259	3.056904851	-0.301029996	0.810382844	3.321793429	0.963310305	0.11883982	0.055721685	0	0.055785899	-2.214894773	1.058982354	-0.391404944	0.111996585	610.9484081	34.04307458
1459	2211.400342	1000	2564	907.9437042	19	0.388023221	214.0043834	MAGPHPKIVITGPHEE	Kd	14480.75226	571.2162593	25.35073543	2.48E-07	HPKIVITGPHEE	10	full	34234.14086	full_calibration.csv	6.91E-05	2.72E-06	1	14.48075226	0.571216259	3.408918021	0	0.810382844	3.321793429	0.963310305	0.11883982	0.055721685	0	0.055785899	-2.214894773	1.058982354	-0.391404944	0.111996585	610.9484081	34.04307458
1460	4154.439107	2000	3955.5	1896.611244	17	0.456161274	474.1528109	MAGPHPKIVITGPHEE	Kd	14480.75226	571.2162593	25.35073543	2.48E-07	HPKIVITGPHEE	10	full	34234.14086	full_calibration.csv	6.91E-05	2.72E-06	2	14.48075226	0.571216259	3.597201389	0.301029996	0.810382844	3.321793429	0.963310305	0.11883982	0.055721685	0	0.055785899	-2.214894773	1.058982354	-0.391404944	0.111996585	610.9484081	34.04307458
1461	134.8564982	32	193	23.48998556	39	-0.750909374	3.810578839	MAGPHPKIIITGPHEE	Kd	8091.394289	334.9517563	24.15689465	3.31E-07	HPKIIITGPHEE	11	full	34234.14086	full_calibration.csv	0.000123588	5.12E-06	0.032	8.091394289	0.334951756	2.285557309	-1.494850022	0.897627659	3.549403728	0.962746195	-0.226297609	0.057118349	-0.345137429	0.057180995	-2.560032203	1.059056762	-0.736542374	0.11269798	341.3789817	19.49900379
1462	264.4894026	63	274.75	76.52936815	44	1.117031746	11.67061923	MAGPHPKIIITGPHEE	Kd	8091.394289	334.9517563	24.15689465	3.31E-07	HPKIIITGPHEE	11	full	34234.14086	full_calibration.csv	0.000123588	5.12E-06	0.063	8.091394289	0.334951756	2.438937701	-1.200659451	0.897627659	3.549403728	0.962746195	-0.226297609	0.057118349	-0.345137429	0.057180995	-2.560032203	1.059056762	-0.736542374	0.11269798	341.3789817	19.49900379
1463	520.8206248	125	588.5	104.7016595	8	0.286070108	39.57350755	MAGPHPKIIITGPHEE	Kd	8091.394289	334.9517563	24.15689465	3.31E-07	HPKIIITGPHEE	11	full	34234.14086	full_calibration.csv	0.000123588	5.12E-06	0.125	8.091394289	0.334951756	2.769746467	-0.903089987	0.897627659	3.549403728	0.962746195	-0.226297609	0.057118349	-0.345137429	0.057180995	-2.560032203	1.059056762	-0.736542374	0.11269798	341.3789817	19.49900379
1464	1026.03173	250	622	251.5581241	21	0.570796392	56.25010658	MAGPHPKIIITGPHEE	Kd	8091.394289	334.9517563	24.15689465	3.31E-07	HPKIIITGPHEE	11	full	34234.14086	full_calibration.csv	0.000123588	5.12E-06	0.25	8.091394289	0.334951756	2.793790385	-0.602059991	0.897627659	3.549403728	0.962746195	-0.226297609	0.057118349	-0.345137429	0.057180995	-2.560032203	1.059056762	-0.736542374	0.11269798	341.3789817	19.49900379
1465	1992.3507	500	2261	449.6835302	8	0.212723191	169.9643985	MAGPHPKIIITGPHEE	Kd	8091.394289	334.9517563	24.15689465	3.31E-07	HPKIIITGPHEE	11	full	34234.14086	full_calibration.csv	0.000123588	5.12E-06	0.5	8.091394289	0.334951756	3.354300562	-0.301029996	0.897627659	3.549403728	0.962746195	-0.226297609	0.057118349	-0.345137429	0.057180995	-2.560032203	1.059056762	-0.736542374	0.11269798	341.3789817	19.49900379
1466	3765.55452	1000	4158	2261.313386	51	0.551706074	319.7980059	MAGPHPKIIITGPHEE	Kd	8091.394289	334.9517563	24.15689465	3.31E-07	HPKIIITGPHEE	11	full	34234.14086	full_calibration.csv	0.000123588	5.12E-06	1	8.091394289	0.334951756	3.618884485	0	0.897627659	3.549403728	0.962746195	-0.226297609	0.057118349	-0.345137429	0.057180995	-2.560032203	1.059056762	-0.736542374	0.11269798	341.3789817	19.49900379
1467	6784.818802	2000	6516	1657.902748	39	0.256160369	268.9473399	MAGPHPKIIITGPHEE	Kd	8091.394289	334.9517563	24.15689465	3.31E-07	HPKIIITGPHEE	11	full	34234.14086	full_calibration.csv	0.000123588	5.12E-06	2	8.091394289	0.334951756	3.813981076	0.301029996	0.897627659	3.549403728	0.962746195	-0.226297609	0.057118349	-0.345137429	0.057180995	-2.560032203	1.059056762	-0.736542374	0.11269798	341.3789817	19.49900379
1468	8.052312664	32	147	23.2643325	12	-0.291715768	7.014460173	MAGPHPKIVLTGPHEE	Kd	136014.9412	35648.08387	3.815490944	0.008806927	HPKIVLTGPHEE	12	full	34234.14086	full_calibration.csv	7.35E-06	1.93E-06	0.032	136.0149412	35.64808387	2.167317335	-1.494850022	0.245635506	2.495209285	0.83471169	1.447126852	0.265027854	1.328287032	0.265041362	-0.886607742	1.090219466	0.936882088	0.282273081	5738.52175	1520.868103
1469	15.84937908	63	170.5	25.85146373	24	-0.446195706	5.390402813	MAGPHPKIVLTGPHEE	Kd	136014.9412	35648.08387	3.815490944	0.008806927	HPKIVLTGPHEE	12	full	34234.14086	full_calibration.csv	7.35E-06	1.93E-06	0.063	136.0149412	35.64808387	2.231724383	-1.200659451	0.245635506	2.495209285	0.83471169	1.447126852	0.265027854	1.328287032	0.265041362	-0.886607742	1.090219466	0.936882088	0.282273081	5738.52175	1520.868103
1470	31.43285923	125	169	30.93081437	36	-0.611482327	5.228261874	MAGPHPKIVLTGPHEE	Kd	136014.9412	35648.08387	3.815490944	0.008806927	HPKIVLTGPHEE	12	full	34234.14086	full_calibration.csv	7.35E-06	1.93E-06	0.125	136.0149412	35.64808387	2.227886705	-0.903089987	0.245635506	2.495209285	0.83471169	1.447126852	0.265027854	1.328287032	0.265041362	-0.886607742	1.090219466	0.936882088	0.282273081	5738.52175	1520.868103
1471	62.80804981	250	184	42.9150931	21	-0.921018861	9.596106542	MAGPHPKIVLTGPHEE	Kd	136014.9412	35648.08387	3.815490944	0.008806927	HPKIVLTGPHEE	12	full	34234.14086	full_calibration.csv	7.35E-06	1.93E-06	0.25	136.0149412	35.64808387	2.264817823	-0.602059991	0.245635506	2.495209285	0.83471169	1.447126852	0.265027854	1.328287032	0.265041362	-0.886607742	1.090219466	0.936882088	0.282273081	5738.52175	1520.868103
1472	125.3860587	500	243.75	115.9036465	16	17.09178197	29.92619285	MAGPHPKIVLTGPHEE	Kd	136014.9412	35648.08387	3.815490944	0.008806927	HPKIVLTGPHEE	12	full	34234.14086	full_calibration.csv	7.35E-06	1.93E-06	0.5	136.0149412	35.64808387	2.386944624	-0.301029996	0.245635506	2.495209285	0.83471169	1.447126852	0.265027854	1.328287032	0.265041362	-0.886607742	1.090219466	0.936882088	0.282273081	5738.52175	1520.868103
1473	249.8569905	1000	400	138.3230606	12	0.923436288	41.70597199	MAGPHPKIVLTGPHEE	Kd	136014.9412	35648.08387	3.815490944	0.008806927	HPKIVLTGPHEE	12	full	34234.14086	full_calibration.csv	7.35E-06	1.93E-06	1	136.0149412	35.64808387	2.602059991	0	0.245635506	2.495209285	0.83471169	1.447126852	0.265027854	1.328287032	0.265041362	-0.886607742	1.090219466	0.936882088	0.282273081	5738.52175	1520.868103
1474	496.0932572	2000	358	244.5095408	15	3.486352768	65.34792354	MAGPHPKIVLTGPHEE	Kd	136014.9412	35648.08387	3.815490944	0.008806927	HPKIVLTGPHEE	12	full	34234.14086	full_calibration.csv	7.35E-06	1.93E-06	2	136.0149412	35.64808387	2.553883027	0.301029996	0.245635506	2.495209285	0.83471169	1.447126852	0.265027854	1.328287032	0.265041362	-0.886607742	1.090219466	0.936882088	0.282273081	5738.52175	1520.868103
1475	651.9438865	32	358	69.30978963	14	0.503025949	19.22307695	MAGPIPKIVITGPHEE	Kd	1648.347849	151.9888364	10.84519027	3.64E-05	IPKIVITGPHEE	14	full	34234.14086	full_calibration.csv	0.000606668	5.59E-05	0.032	1.648347849	0.151988836	2.553883027	-1.494850022	0.909398637	4.116219271	0.932856732	-1.169776965	0.100254486	-1.288616785	0.10029019	-3.503511558	1.062256881	-1.680021729	0.139604051	69.54441843	6.972139913
1476	1260.264461	63	1306	315.8310708	14	0.287998111	87.59577848	MAGPIPKIVITGPHEE	Kd	1648.347849	151.9888364	10.84519027	3.64E-05	IPKIVITGPHEE	14	full	34234.14086	full_calibration.csv	0.000606668	5.59E-05	0.063	1.648347849	0.151988836	3.115943177	-1.200659451	0.909398637	4.116219271	0.932856732	-1.169776965	0.100254486	-1.288616785	0.10029019	-3.503511558	1.062256881	-1.680021729	0.139604051	69.54441843	6.972139913
1477	2413.101078	125	2718	666.6651928	13	0.25596289	192.4496643	MAGPIPKIVITGPHEE	Kd	1648.347849	151.9888364	10.84519027	3.64E-05	IPKIVITGPHEE	14	full	34234.14086	full_calibration.csv	0.000606668	5.59E-05	0.125	1.648347849	0.151988836	3.434249452	-0.903089987	0.909398637	4.116219271	0.932856732	-1.169776965	0.100254486	-1.288616785	0.10029019	-3.503511558	1.062256881	-1.680021729	0.139604051	69.54441843	6.972139913
1478	4508.412522	250	3343.5	1465.746045	29	0.448562032	276.9999657	MAGPIPKIVITGPHEE	Kd	1648.347849	151.9888364	10.84519027	3.64E-05	IPKIVITGPHEE	14	full	34234.14086	full_calibration.csv	0.000606668	5.59E-05	0.25	1.648347849	0.151988836	3.524201328	-0.602059991	0.909398637	4.116219271	0.932856732	-1.169776965	0.100254486	-1.288616785	0.10029019	-3.503511558	1.062256881	-1.680021729	0.139604051	69.54441843	6.972139913
1479	7967.550709	500	10651.25	1822.551787	14	0.17318816	505.484917	MAGPIPKIVITGPHEE	Kd	1648.347849	151.9888364	10.84519027	3.64E-05	IPKIVITGPHEE	14	full	34234.14086	full_calibration.csv	0.000606668	5.59E-05	0.5	1.648347849	0.151988836	4.027400578	-0.301029996	0.909398637	4.116219271	0.932856732	-1.169776965	0.100254486	-1.288616785	0.10029019	-3.503511558	1.062256881	-1.680021729	0.139604051	69.54441843	6.972139913
1480	12926.60285	1000	11920.5	3706.642106	27	0.30230289	726.9323241	MAGPIPKIVITGPHEE	Kd	1648.347849	151.9888364	10.84519027	3.64E-05	IPKIVITGPHEE	14	full	34234.14086	full_calibration.csv	0.000606668	5.59E-05	1	1.648347849	0.151988836	4.076294472	0	0.909398637	4.116219271	0.932856732	-1.169776965	0.100254486	-1.288616785	0.10029019	-3.503511558	1.062256881	-1.680021729	0.139604051	69.54441843	6.972139913
1481	18766.92809	2000	18259.5	4330.460614	20	0.245955617	993.4757998	MAGPIPKIVITGPHEE	Kd	1648.347849	151.9888364	10.84519027	3.64E-05	IPKIVITGPHEE	14	full	34234.14086	full_calibration.csv	0.000606668	5.59E-05	2	1.648347849	0.151988836	4.261488881	0.301029996	0.909398637	4.116219271	0.932856732	-1.169776965	0.100254486	-1.288616785	0.10029019	-3.503511558	1.062256881	-1.680021729	0.139604051	69.54441843	6.972139913
1482	281.1628496	32	202	20.76559655	10	-0.876185508	6.921865516	MAGPTPKIVITGPHEE	Kd	3864.291807	234.0199514	16.51265964	3.14E-06	TPKIVITGPHEE	15	full	34234.14086	full_calibration.csv	0.00025878	1.57E-05	0.032	3.864291807	0.234019951	2.305351369	-1.494850022	1.014938421	3.804343492	0.9843306	-0.664538029	0.072224217	-0.783377849	0.072273771	-2.998272623	1.0599788	-1.174782793	0.12105646	163.0359311	11.77514254
1483	549.1700083	63	400.5	114.8132825	16	0.76383057	29.64466208	MAGPTPKIVITGPHEE	Kd	3864.291807	234.0199514	16.51265964	3.14E-06	TPKIVITGPHEE	15	full	34234.14086	full_calibration.csv	0.00025878	1.57E-05	0.063	3.864291807	0.234019951	2.60260252	-1.200659451	1.014938421	3.804343492	0.9843306	-0.664538029	0.072224217	-0.783377849	0.072273771	-2.998272623	1.0599788	-1.174782793	0.12105646	163.0359311	11.77514254
1484	1072.688541	125	780.5	158.6554475	7	0.271371566	64.77081521	MAGPTPKIVITGPHEE	Kd	3864.291807	234.0199514	16.51265964	3.14E-06	TPKIVITGPHEE	15	full	34234.14086	full_calibration.csv	0.00025878	1.57E-05	0.125	3.864291807	0.234019951	2.892372907	-0.903089987	1.014938421	3.804343492	0.9843306	-0.664538029	0.072224217	-0.783377849	0.072273771	-2.998272623	1.0599788	-1.174782793	0.12105646	163.0359311	11.77514254
1485	2080.196451	250	1145.25	416.8929948	12	0.485064812	125.6979674	MAGPTPKIVITGPHEE	Kd	3864.291807	234.0199514	16.51265964	3.14E-06	TPKIVITGPHEE	15	full	34234.14086	full_calibration.csv	0.00025878	1.57E-05	0.25	3.864291807	0.234019951	3.0589003	-0.602059991	1.014938421	3.804343492	0.9843306	-0.664538029	0.072224217	-0.783377849	0.072273771	-2.998272623	1.0599788	-1.174782793	0.12105646	163.0359311	11.77514254
1486	3922.072855	500	3491	1140.353767	13	0.338604181	329.1917771	MAGPTPKIVITGPHEE	Kd	3864.291807	234.0199514	16.51265964	3.14E-06	TPKIVITGPHEE	15	full	34234.14086	full_calibration.csv	0.00025878	1.57E-05	0.5	3.864291807	0.234019951	3.542949849	-0.301029996	1.014938421	3.804343492	0.9843306	-0.664538029	0.072224217	-0.783377849	0.072273771	-2.998272623	1.0599788	-1.174782793	0.12105646	163.0359311	11.77514254
1487	7037.846868	1000	8095	794.0047481	5	0.105136948	397.002374	MAGPTPKIVITGPHEE	Kd	3864.291807	234.0199514	16.51265964	3.14E-06	TPKIVITGPHEE	15	full	34234.14086	full_calibration.csv	0.00025878	1.57E-05	1	3.864291807	0.234019951	3.908216853	0	1.014938421	3.804343492	0.9843306	-0.664538029	0.072224217	-0.783377849	0.072273771	-2.998272623	1.0599788	-1.174782793	0.12105646	163.0359311	11.77514254
1488	11675.45613	2000	11392	3814.711719	8	0.371779349	1441.825504	MAGPTPKIVITGPHEE	Kd	3864.291807	234.0199514	16.51265964	3.14E-06	TPKIVITGPHEE	15	full	34234.14086	full_calibration.csv	0.00025878	1.57E-05	2	3.864291807	0.234019951	4.056599976	0.301029996	1.014938421	3.804343492	0.9843306	-0.664538029	0.072224217	-0.783377849	0.072273771	-2.998272623	1.0599788	-1.174782793	0.12105646	163.0359311	11.77514254
1489	38.83690414	32	204.5	18.26086481	7	-0.916315797	7.454966842	MAGPHPKIVITTPHEE	Kd	28175.51375	1624.617409	17.3428609	2.36E-06	HPKIVITTPHEE	16	full	34234.14086	full_calibration.csv	3.55E-05	2.05E-06	0.032	28.17551375	1.624617409	2.310693312	-1.494850022	0.58872706	3.05876395	0.90942064	0.513560164	0.069811312	0.394720343	0.069862577	-1.82017443	1.059817125	0.003315399	0.119632555	1188.735569	82.98718935
1490	76.37621772	63	242	45.9678681	35	1.87078533	7.883424342	MAGPHPKIVITTPHEE	Kd	28175.51375	1624.617409	17.3428609	2.36E-06	HPKIVITTPHEE	16	full	34234.14086	full_calibration.csv	3.55E-05	2.05E-06	0.063	28.17551375	1.624617409	2.383815366	-1.200659451	0.58872706	3.05876395	0.90942064	0.513560164	0.069811312	0.394720343	0.069862577	-1.82017443	1.059817125	0.003315399	0.119632555	1188.735569	82.98718935
1491	151.2081245	125	262.75	60.53663018	16	1.36999446	15.6304907	MAGPHPKIVITTPHEE	Kd	28175.51375	1624.617409	17.3428609	2.36E-06	HPKIVITTPHEE	16	full	34234.14086	full_calibration.csv	3.55E-05	2.05E-06	0.125	28.17551375	1.624617409	2.419542725	-0.903089987	0.58872706	3.05876395	0.90942064	0.513560164	0.069811312	0.394720343	0.069862577	-1.82017443	1.059817125	0.003315399	0.119632555	1188.735569	82.98718935
1492	301.0863863	250	364.25	823.2715943	6	-8.480050757	368.1782498	MAGPHPKIVITTPHEE	Kd	28175.51375	1624.617409	17.3428609	2.36E-06	HPKIVITTPHEE	16	full	34234.14086	full_calibration.csv	3.55E-05	2.05E-06	0.25	28.17551375	1.624617409	2.56139956	-0.602059991	0.58872706	3.05876395	0.90942064	0.513560164	0.069811312	0.394720343	0.069862577	-1.82017443	1.059817125	0.003315399	0.119632555	1188.735569	82.98718935
1493	596.9228862	500	632	253.4550527	21	0.565507449	56.6742727	MAGPHPKIVITTPHEE	Kd	28175.51375	1624.617409	17.3428609	2.36E-06	HPKIVITTPHEE	16	full	34234.14086	full_calibration.csv	3.55E-05	2.05E-06	0.5	28.17551375	1.624617409	2.800717078	-0.301029996	0.58872706	3.05876395	0.90942064	0.513560164	0.069811312	0.394720343	0.069862577	-1.82017443	1.059817125	0.003315399	0.119632555	1188.735569	82.98718935
1494	1173.386051	1000	1357.5	298.1694075	26	0.266662238	59.6338815	MAGPHPKIVITTPHEE	Kd	28175.51375	1624.617409	17.3428609	2.36E-06	HPKIVITTPHEE	16	full	34234.14086	full_calibration.csv	3.55E-05	2.05E-06	1	28.17551375	1.624617409	3.132739838	0	0.58872706	3.05876395	0.90942064	0.513560164	0.069811312	0.394720343	0.069862577	-1.82017443	1.059817125	0.003315399	0.119632555	1188.735569	82.98718935
1495	2269.001359	2000	2135	426.2208396	7	0.242269255	174.0039291	MAGPHPKIVITTPHEE	Kd	28175.51375	1624.617409	17.3428609	2.36E-06	HPKIVITTPHEE	16	full	34234.14086	full_calibration.csv	3.55E-05	2.05E-06	2	28.17551375	1.624617409	3.329397879	0.301029996	0.58872706	3.05876395	0.90942064	0.513560164	0.069811312	0.394720343	0.069862577	-1.82017443	1.059817125	0.003315399	0.119632555	1188.735569	82.98718935
1496	12.88425844	32	188	27.320845	7	-0.700534487	11.15368826	MAGPHPKIVITNPHEE	Kd	84993.65458	16518.43291	5.145382436	0.002124814	HPKIVITNPHEE	17	full	34234.14086	full_calibration.csv	1.18E-05	2.29E-06	0.032	84.99365458	16.51843291	2.274157849	-1.494850022	0.306328278	2.677160622	0.922146606	1.168305285	0.198293752	1.049465465	0.198311806	-1.165429309	1.075945692	0.658060521	0.220813815	3585.914394	711.0644178
1497	25.35663888	63	220.75	28.81195631	14	-1.727483462	7.99099891	MAGPHPKIVITNPHEE	Kd	84993.65458	16518.43291	5.145382436	0.002124814	HPKIVITNPHEE	17	full	34234.14086	full_calibration.csv	1.18E-05	2.29E-06	0.063	84.99365458	16.51843291	2.343900712	-1.200659451	0.306328278	2.677160622	0.922146606	1.168305285	0.198293752	1.049465465	0.198311806	-1.165429309	1.075945692	0.658060521	0.220813815	3585.914394	711.0644178
1498	50.27414529	125	206	45.6867305	16	66.45342618	11.79626309	MAGPHPKIVITNPHEE	Kd	84993.65458	16518.43291	5.145382436	0.002124814	HPKIVITNPHEE	17	full	34234.14086	full_calibration.csv	1.18E-05	2.29E-06	0.125	84.99365458	16.51843291	2.31386722	-0.903089987	0.306328278	2.677160622	0.922146606	1.168305285	0.198293752	1.049465465	0.198311806	-1.165429309	1.075945692	0.658060521	0.220813815	3585.914394	711.0644178
1499	100.4008481	250	284	27.96084036	8	0.519597498	10.56820429	MAGPHPKIVITNPHEE	Kd	84993.65458	16518.43291	5.145382436	0.002124814	HPKIVITNPHEE	17	full	34234.14086	full_calibration.csv	1.18E-05	2.29E-06	0.25	84.99365458	16.51843291	2.45331834	-0.602059991	0.306328278	2.677160622	0.922146606	1.168305285	0.198293752	1.049465465	0.198311806	-1.165429309	1.075945692	0.658060521	0.220813815	3585.914394	711.0644178
1500	200.2145132	500	361	78.08530947	15	0.469074747	20.86917678	MAGPHPKIVITNPHEE	Kd	84993.65458	16518.43291	5.145382436	0.002124814	HPKIVITNPHEE	17	full	34234.14086	full_calibration.csv	1.18E-05	2.29E-06	0.5	84.99365458	16.51843291	2.557507202	-0.301029996	0.306328278	2.677160622	0.922146606	1.168305285	0.198293752	1.049465465	0.198311806	-1.165429309	1.075945692	0.658060521	0.220813815	3585.914394	711.0644178
1501	398.1007788	1000	497.75	22.25	2	0.081876725	22.25	MAGPHPKIVITNPHEE	Kd	84993.65458	16518.43291	5.145382436	0.002124814	HPKIVITNPHEE	17	full	34234.14086	full_calibration.csv	1.18E-05	2.29E-06	1	84.99365458	16.51843291	2.697011269	0	0.306328278	2.677160622	0.922146606	1.168305285	0.198293752	1.049465465	0.198311806	-1.165429309	1.075945692	0.658060521	0.220813815	3585.914394	711.0644178
1502	787.049148	2000	651	148.0695234	31	0.353932857	27.03367269	MAGPHPKIVITNPHEE	Kd	84993.65458	16518.43291	5.145382436	0.002124814	HPKIVITNPHEE	17	full	34234.14086	full_calibration.csv	1.18E-05	2.29E-06	2	84.99365458	16.51843291	2.813580989	0.301029996	0.306328278	2.677160622	0.922146606	1.168305285	0.198293752	1.049465465	0.198311806	-1.165429309	1.075945692	0.658060521	0.220813815	3585.914394	711.0644178
1503	154.9124224	32	211	29.94734268	30	-2.454700219	5.561081926	MAGPIPKIIITYPGEE	Kd	7039.689218	202.2013786	34.81523849	3.74E-08	IPKIIITYPGEE	18	full	34234.14086	full_calibration.csv	0.000142052	4.08E-06	0.032	7.039689218	0.202201379	2.324282455	-1.494850022	0.879185849	3.592834171	0.980073377	-0.308865173	0.048722549	-0.427704994	0.048795975	-2.642599767	1.058637146	-0.819109938	0.108684018	297.0071474	14.47094525
1504	303.6527163	63	370	102.4188855	11	0.86862586	32.38769535	MAGPIPKIIITYPGEE	Kd	7039.689218	202.2013786	34.81523849	3.74E-08	IPKIIITYPGEE	18	full	34234.14086	full_calibration.csv	0.000142052	4.08E-06	0.063	7.039689218	0.202201379	2.568201724	-1.200659451	0.879185849	3.592834171	0.980073377	-0.308865173	0.048722549	-0.427704994	0.048795975	-2.642599767	1.058637146	-0.819109938	0.108684018	297.0071474	14.47094525
1505	597.2719091	125	618	135.1954689	27	0.329745046	26.51401285	MAGPIPKIIITYPGEE	Kd	7039.689218	202.2013786	34.81523849	3.74E-08	IPKIIITYPGEE	18	full	34234.14086	full_calibration.csv	0.000142052	4.08E-06	0.125	7.039689218	0.202201379	2.790988475	-0.903089987	0.879185849	3.592834171	0.980073377	-0.308865173	0.048722549	-0.427704994	0.048795975	-2.642599767	1.058637146	-0.819109938	0.108684018	297.0071474	14.47094525
1506	1174.060369	250	805.5	196.0733475	25	0.360309727	40.02330446	MAGPIPKIIITYPGEE	Kd	7039.689218	202.2013786	34.81523849	3.74E-08	IPKIIITYPGEE	18	full	34234.14086	full_calibration.csv	0.000142052	4.08E-06	0.25	7.039689218	0.202201379	2.906065545	-0.602059991	0.879185849	3.592834171	0.980073377	-0.308865173	0.048722549	-0.427704994	0.048795975	-2.642599767	1.058637146	-0.819109938	0.108684018	297.0071474	14.47094525
1507	2270.262067	500	2150	708.715456	13	0.349929771	204.5885297	MAGPIPKIIITYPGEE	Kd	7039.689218	202.2013786	34.81523849	3.74E-08	IPKIIITYPGEE	18	full	34234.14086	full_calibration.csv	0.000142052	4.08E-06	0.5	7.039689218	0.202201379	3.33243846	-0.301029996	0.879185849	3.592834171	0.980073377	-0.308865173	0.048722549	-0.427704994	0.048795975	-2.642599767	1.058637146	-0.819109938	0.108684018	297.0071474	14.47094525
1508	4258.142315	1000	4581	1155.089843	13	0.279555203	333.4457158	MAGPIPKIIITYPGEE	Kd	7039.689218	202.2013786	34.81523849	3.74E-08	IPKIIITYPGEE	18	full	34234.14086	full_calibration.csv	0.000142052	4.08E-06	1	7.039689218	0.202201379	3.660960292	0	0.879185849	3.592834171	0.980073377	-0.308865173	0.048722549	-0.427704994	0.048795975	-2.642599767	1.058637146	-0.819109938	0.108684018	297.0071474	14.47094525
1509	7574.185358	2000	7477.25	1699.146642	18	0.251356152	412.103593	MAGPIPKIIITYPGEE	Kd	7039.689218	202.2013786	34.81523849	3.74E-08	IPKIIITYPGEE	18	full	34234.14086	full_calibration.csv	0.000142052	4.08E-06	2	7.039689218	0.202201379	3.873741901	0.301029996	0.879185849	3.592834171	0.980073377	-0.308865173	0.048722549	-0.427704994	0.048795975	-2.642599767	1.058637146	-0.819109938	0.108684018	297.0071474	14.47094525
1510	67.37733868	32	199.75	25.49138607	12	-1.071441796	7.68594209	MAGPVPKIIITYPGEE	Kd	16227.06468	1187.504572	13.66484396	9.54E-06	VPKIIITYPGEE	19	full	34234.14086	full_calibration.csv	6.16E-05	4.51E-06	0.032	16.22706468	1.187504572	2.300486788	-1.494850022	0.741973248	3.297723909	0.943843068	0.186358901	0.08309186	0.067519081	0.083134936	-2.147375692	1.060774706	-0.323885863	0.127838125	684.6259888	56.88684706
1511	132.3967042	63	233.5	32.28227595	52	4.524739486	4.520422807	MAGPVPKIIITYPGEE	Kd	16227.06468	1187.504572	13.66484396	9.54E-06	VPKIIITYPGEE	19	full	34234.14086	full_calibration.csv	6.16E-05	4.51E-06	0.063	16.22706468	1.187504572	2.368286885	-1.200659451	0.741973248	3.297723909	0.943843068	0.186358901	0.08309186	0.067519081	0.083134936	-2.147375692	1.060774706	-0.323885863	0.127838125	684.6259888	56.88684706
1512	261.6958587	125	423.5	78.76077704	5	0.482307269	39.38038852	MAGPVPKIIITYPGEE	Kd	16227.06468	1187.504572	13.66484396	9.54E-06	VPKIIITYPGEE	19	full	34234.14086	full_calibration.csv	6.16E-05	4.51E-06	0.125	16.22706468	1.187504572	2.626853415	-0.903089987	0.741973248	3.297723909	0.943843068	0.186358901	0.08309186	0.067519081	0.083134936	-2.147375692	1.060774706	-0.323885863	0.127838125	684.6259888	56.88684706
1513	519.4211093	250	440	67.91199806	43	0.31435663	10.4790488	MAGPVPKIIITYPGEE	Kd	16227.06468	1187.504572	13.66484396	9.54E-06	VPKIIITYPGEE	19	full	34234.14086	full_calibration.csv	6.16E-05	4.51E-06	0.25	16.22706468	1.187504572	2.643452676	-0.602059991	0.741973248	3.297723909	0.943843068	0.186358901	0.08309186	0.067519081	0.083134936	-2.147375692	1.060774706	-0.323885863	0.127838125	684.6259888	56.88684706
1514	1023.315851	500	1257	199.8526019	4	0.192212168	115.3849535	MAGPVPKIIITYPGEE	Kd	16227.06468	1187.504572	13.66484396	9.54E-06	VPKIIITYPGEE	19	full	34234.14086	full_calibration.csv	6.16E-05	4.51E-06	0.5	16.22706468	1.187504572	3.099335278	-0.301029996	0.741973248	3.297723909	0.943843068	0.186358901	0.08309186	0.067519081	0.083134936	-2.147375692	1.060774706	-0.323885863	0.127838125	684.6259888	56.88684706
1515	1987.230065	1000	2503.5	684.3027587	23	0.327908735	145.8938384	MAGPVPKIIITYPGEE	Kd	16227.06468	1187.504572	13.66484396	9.54E-06	VPKIIITYPGEE	19	full	34234.14086	full_calibration.csv	6.16E-05	4.51E-06	1	16.22706468	1.187504572	3.398547596	0	0.741973248	3.297723909	0.943843068	0.186358901	0.08309186	0.067519081	0.083134936	-2.147375692	1.060774706	-0.323885863	0.127838125	684.6259888	56.88684706
1516	3756.407459	2000	3391	1743.199672	22	0.622985961	380.3973546	MAGPVPKIIITYPGEE	Kd	16227.06468	1187.504572	13.66484396	9.54E-06	VPKIIITYPGEE	19	full	34234.14086	full_calibration.csv	6.16E-05	4.51E-06	2	16.22706468	1.187504572	3.53032779	0.301029996	0.741973248	3.297723909	0.943843068	0.186358901	0.08309186	0.067519081	0.083134936	-2.147375692	1.060774706	-0.323885863	0.127838125	684.6259888	56.88684706
1517	115.1025487	32	226	44.37543249	55	4.31210033	6.038731484	MAGPIPKIIVTYPGEE	Kd	9485.534754	177.4896477	53.44274934	2.88E-09	IPKIIVTYPGEE	20	full	34234.14086	full_calibration.csv	0.000105424	1.97E-06	0.032	9.485534754	0.177489648	2.354108439	-1.494850022	0.810282354	3.484905768	0.980758748	-0.132030227	0.043577486	-0.250870047	0.043659566	-2.465764821	1.058412829	-0.642274992	0.106476882	400.1982945	17.43963575
1518	225.8724432	63	315	70.39106653	44	0.672209859	10.73453701	MAGPIPKIIVTYPGEE	Kd	9485.534754	177.4896477	53.44274934	2.88E-09	IPKIIVTYPGEE	20	full	34234.14086	full_calibration.csv	0.000105424	1.97E-06	0.063	9.485534754	0.177489648	2.498310554	-1.200659451	0.810282354	3.484905768	0.980758748	-0.132030227	0.043577486	-0.250870047	0.043659566	-2.465764821	1.058412829	-0.642274992	0.106476882	400.1982945	17.43963575
1519	445.2684181	125	544	115.0735069	34	0.353864173	20.03172634	MAGPIPKIIVTYPGEE	Kd	9485.534754	177.4896477	53.44274934	2.88E-09	IPKIIVTYPGEE	20	full	34234.14086	full_calibration.csv	0.000105424	1.97E-06	0.125	9.485534754	0.177489648	2.7355989	-0.903089987	0.810282354	3.484905768	0.980758748	-0.132030227	0.043577486	-0.250870047	0.043659566	-2.465764821	1.058412829	-0.642274992	0.106476882	400.1982945	17.43963575
1520	879.1027335	250	736	223.408194	49	0.41212241	32.24619524	MAGPIPKIIVTYPGEE	Kd	9485.534754	177.4896477	53.44274934	2.88E-09	IPKIIVTYPGEE	20	full	34234.14086	full_calibration.csv	0.000105424	1.97E-06	0.25	9.485534754	0.177489648	2.866877814	-0.602059991	0.810282354	3.484905768	0.980758748	-0.132030227	0.043577486	-0.250870047	0.043659566	-2.465764821	1.058412829	-0.642274992	0.106476882	400.1982945	17.43963575
1521	1714.186656	500	1816	538.3646008	38	0.312961975	88.50659517	MAGPIPKIIVTYPGEE	Kd	9485.534754	177.4896477	53.44274934	2.88E-09	IPKIIVTYPGEE	20	full	34234.14086	full_calibration.csv	0.000105424	1.97E-06	0.5	9.485534754	0.177489648	3.259115844	-0.301029996	0.810282354	3.484905768	0.980758748	-0.132030227	0.043577486	-0.250870047	0.043659566	-2.465764821	1.058412829	-0.642274992	0.106476882	400.1982945	17.43963575
1522	3264.892221	1000	3147	1239.90066	33	0.444505397	219.1855413	MAGPIPKIIVTYPGEE	Kd	9485.534754	177.4896477	53.44274934	2.88E-09	IPKIIVTYPGEE	20	full	34234.14086	full_calibration.csv	0.000105424	1.97E-06	1	9.485534754	0.177489648	3.497896743	0	0.810282354	3.484905768	0.980758748	-0.132030227	0.043577486	-0.250870047	0.043659566	-2.465764821	1.058412829	-0.642274992	0.106476882	400.1982945	17.43963575
1523	5961.261986	2000	6007.75	1484.187727	38	0.25206373	243.9989593	MAGPIPKIIVTYPGEE	Kd	9485.534754	177.4896477	53.44274934	2.88E-09	IPKIIVTYPGEE	20	full	34234.14086	full_calibration.csv	0.000105424	1.97E-06	2	9.485534754	0.177489648	3.778711852	0.301029996	0.810282354	3.484905768	0.980758748	-0.132030227	0.043577486	-0.250870047	0.043659566	-2.465764821	1.058412829	-0.642274992	0.106476882	400.1982945	17.43963575
1524	129.7335908	32	179	32.27650621	19	-0.713500428	7.607645472	MAGPIPKIIVTYPDEE	Kd	8412.17009	590.2603455	14.25162668	7.46E-06	IPKIIVTYPDEE	21	full	34234.14086	full_calibration.csv	0.000118875	8.34E-06	0.032	8.41217009	0.590260346	2.252853031	-1.494850022	0.862012479	3.564605294	0.978993047	-0.20324271	0.08045086	-0.32208253	0.08049535	-2.536977303	1.060571101	-0.713487474	0.126137504	354.9126339	28.55302679
1525	254.4787717	63	403	84.39526611	19	0.494147937	19.89215499	MAGPIPKIIVTYPDEE	Kd	8412.17009	590.2603455	14.25162668	7.46E-06	IPKIIVTYPDEE	21	full	34234.14086	full_calibration.csv	0.000118875	8.34E-06	0.063	8.41217009	0.590260346	2.605305046	-1.200659451	0.862012479	3.564605294	0.978993047	-0.20324271	0.08045086	-0.32208253	0.08049535	-2.536977303	1.060571101	-0.713487474	0.126137504	354.9126339	28.55302679
1526	501.2513002	125	596	89.05833905	7	0.248716686	36.35791467	MAGPIPKIIVTYPDEE	Kd	8412.17009	590.2603455	14.25162668	7.46E-06	IPKIIVTYPDEE	21	full	34234.14086	full_calibration.csv	0.000118875	8.34E-06	0.125	8.41217009	0.590260346	2.77524626	-0.903089987	0.862012479	3.564605294	0.978993047	-0.20324271	0.08045086	-0.32208253	0.08049535	-2.536977303	1.060571101	-0.713487474	0.126137504	354.9126339	28.55302679
1527	988.0359224	250	838.5	211.6840875	11	0.28988795	66.94038609	MAGPIPKIIVTYPDEE	Kd	8412.17009	590.2603455	14.25162668	7.46E-06	IPKIIVTYPDEE	21	full	34234.14086	full_calibration.csv	0.000118875	8.34E-06	0.25	8.41217009	0.590260346	2.923503067	-0.602059991	0.862012479	3.564605294	0.978993047	-0.20324271	0.08045086	-0.32208253	0.08049535	-2.536977303	1.060571101	-0.713487474	0.126137504	354.9126339	28.55302679
1528	1920.640008	500	2218	785.9035536	15	0.341138521	210.0415598	MAGPIPKIIVTYPDEE	Kd	8412.17009	590.2603455	14.25162668	7.46E-06	IPKIIVTYPDEE	21	full	34234.14086	full_calibration.csv	0.000118875	8.34E-06	0.5	8.41217009	0.590260346	3.345961542	-0.301029996	0.862012479	3.564605294	0.978993047	-0.20324271	0.08045086	-0.32208253	0.08049535	-2.536977303	1.060571101	-0.713487474	0.126137504	354.9126339	28.55302679
1529	3637.220804	1000	4503	11401.19253	19	1.395418392	2687.286849	MAGPIPKIIVTYPDEE	Kd	8412.17009	590.2603455	14.25162668	7.46E-06	IPKIIVTYPDEE	21	full	34234.14086	full_calibration.csv	0.000118875	8.34E-06	1	8.41217009	0.590260346	3.653501947	0	0.862012479	3.564605294	0.978993047	-0.20324271	0.08045086	-0.32208253	0.08049535	-2.536977303	1.060571101	-0.713487474	0.126137504	354.9126339	28.55302679
1530	6575.793627	2000	5954.5	1847.644104	19	0.337870367	435.4938918	MAGPIPKIIVTYPDEE	Kd	8412.17009	590.2603455	14.25162668	7.46E-06	IPKIIVTYPDEE	21	full	34234.14086	full_calibration.csv	0.000118875	8.34E-06	2	8.41217009	0.590260346	3.7748453	0.301029996	0.862012479	3.564605294	0.978993047	-0.20324271	0.08045086	-0.32208253	0.08049535	-2.536977303	1.060571101	-0.713487474	0.126137504	354.9126339	28.55302679
1531	1996.347653	32	1723.5	640.3280345	11	0.415772881	202.4895039	MAGPHPVIVITGPZEE	Kd	516.7483633	92.66613323	5.576453287	0.00141116	HPVIVITGPZEE	22	full	34234.14086	full_calibration.csv	0.001935178	0.000347027	0.032	0.516748363	0.092666133	3.236411288	-1.494850022	0.571381528	4.332613981	0.826417923	-1.857640794	0.183593274	-1.976480614	0.183612773	-4.191375387	1.07333369	-2.367885558	0.20771331	21.80180865	4.002665428
1532	3720.15	63	6588	3001.518427	13	0.421106622	866.4637359	MAGPHPVIVITGPZEE	Kd	516.7483633	92.66613323	5.576453287	0.00141116	HPVIVITGPZEE	22	full	34234.14086	full_calibration.csv	0.001935178	0.000347027	0.063	0.516748363	0.092666133	3.81875359	-1.200659451	0.571381528	4.332613981	0.826417923	-1.857640794	0.183593274	-1.976480614	0.183612773	-4.191375387	1.07333369	-2.367885558	0.20771331	21.80180865	4.002665428
1533	6668.139495	125	7463	2286.702575	3	0.347734576	1616.942897	MAGPHPVIVITGPZEE	Kd	516.7483633	92.66613323	5.576453287	0.00141116	HPVIVITGPZEE	22	full	34234.14086	full_calibration.csv	0.001935178	0.000347027	0.125	0.516748363	0.092666133	3.872913442	-0.903089987	0.571381528	4.332613981	0.826417923	-1.857640794	0.183593274	-1.976480614	0.183612773	-4.191375387	1.07333369	-2.367885558	0.20771331	21.80180865	4.002665428
1534	11162.11736	250	10267	4313.077502	35	0.427913176	739.6866893	MAGPHPVIVITGPZEE	Kd	516.7483633	92.66613323	5.576453287	0.00141116	HPVIVITGPZEE	22	full	34234.14086	full_calibration.csv	0.001935178	0.000347027	0.25	0.516748363	0.092666133	4.011443562	-0.602059991	0.571381528	4.332613981	0.826417923	-1.857640794	0.183593274	-1.976480614	0.183612773	-4.191375387	1.07333369	-2.367885558	0.20771331	21.80180865	4.002665428
1535	16835.10989	500	21109	4883.400286	30	0.240462484	906.8246675	MAGPHPVIVITGPZEE	Kd	516.7483633	92.66613323	5.576453287	0.00141116	HPVIVITGPZEE	22	full	34234.14086	full_calibration.csv	0.001935178	0.000347027	0.5	0.516748363	0.092666133	4.32446766	-0.301029996	0.571381528	4.332613981	0.826417923	-1.857640794	0.183593274	-1.976480614	0.183612773	-4.191375387	1.07333369	-2.367885558	0.20771331	21.80180865	4.002665428
1536	22570.74521	1000	19789	6847.000332	5	0.313656702	3423.500166	MAGPHPVIVITGPZEE	Kd	516.7483633	92.66613323	5.576453287	0.00141116	HPVIVITGPZEE	22	full	34234.14086	full_calibration.csv	0.001935178	0.000347027	1	0.516748363	0.092666133	4.296423849	0	0.571381528	4.332613981	0.826417923	-1.857640794	0.183593274	-1.976480614	0.183612773	-4.191375387	1.07333369	-2.367885558	0.20771331	21.80180865	4.002665428
1537	27205.05662	2000	23318.75	6979.680278	14	0.276867065	1935.81501	MAGPHPVIVITGPZEE	Kd	516.7483633	92.66613323	5.576453287	0.00141116	HPVIVITGPZEE	22	full	34234.14086	full_calibration.csv	0.001935178	0.000347027	2	0.516748363	0.092666133	4.367705266	0.301029996	0.571381528	4.332613981	0.826417923	-1.857640794	0.183593274	-1.976480614	0.183612773	-4.191375387	1.07333369	-2.367885558	0.20771331	21.80180865	4.002665428
1538	6255.446372	32	3299	2148.230202	13	0.657554393	620.1406427	MAGPIPKIIVTAPZEE	Kd	143.1261928	27.28841189	5.244944021	0.001929171	IPKIIVTAPZEE	24	full	34234.14086	full_calibration.csv	0.006986841	0.00133211	0.032	0.143126193	0.027288412	3.518382316	-1.494850022	0.446138576	4.487648272	0.65781995	-2.618951582	0.19467931	-2.737791402	0.194697699	-4.952686176	1.075285429	-3.129196347	0.21757381	6.038548142	1.175580387
1539	10463.25479	63	15157.5	915.5	2	0.061313331	915.5	MAGPIPKIIVTAPZEE	Kd	143.1261928	27.28841189	5.244944021	0.001929171	IPKIIVTAPZEE	24	full	34234.14086	full_calibration.csv	0.006986841	0.00133211	0.063	0.143126193	0.027288412	4.180627577	-1.200659451	0.446138576	4.487648272	0.65781995	-2.618951582	0.19467931	-2.737791402	0.194697699	-4.952686176	1.075285429	-3.129196347	0.21757381	6.038548142	1.175580387
1540	15959.90143	125	12769	4443.092619	51	0.345923524	628.3481841	MAGPIPKIIVTAPZEE	Kd	143.1261928	27.28841189	5.244944021	0.001929171	IPKIIVTAPZEE	24	full	34234.14086	full_calibration.csv	0.006986841	0.00133211	0.125	0.143126193	0.027288412	4.106156887	-0.903089987	0.446138576	4.487648272	0.65781995	-2.618951582	0.19467931	-2.737791402	0.194697699	-4.952686176	1.075285429	-3.129196347	0.21757381	6.038548142	1.175580387
1541	21770.45277	250	22095	7354.549409	15	0.381996967	1965.586009	MAGPIPKIIVTAPZEE	Kd	143.1261928	27.28841189	5.244944021	0.001929171	IPKIIVTAPZEE	24	full	34234.14086	full_calibration.csv	0.006986841	0.00133211	0.25	0.143126193	0.027288412	4.344294006	-0.602059991	0.446138576	4.487648272	0.65781995	-2.618951582	0.19467931	-2.737791402	0.194697699	-4.952686176	1.075285429	-3.129196347	0.21757381	6.038548142	1.175580387
1542	26615.41486	500	28805.25	6933.154716	4	0.272061793	4002.858741	MAGPIPKIIVTAPZEE	Kd	143.1261928	27.28841189	5.244944021	0.001929171	IPKIIVTAPZEE	24	full	34234.14086	full_calibration.csv	0.006986841	0.00133211	0.5	0.143126193	0.027288412	4.459471649	-0.301029996	0.446138576	4.487648272	0.65781995	-2.618951582	0.19467931	-2.737791402	0.194697699	-4.952686176	1.075285429	-3.129196347	0.21757381	6.038548142	1.175580387
1543	29947.82297	1000	30007.25	11734.73939	6	0.431240595	5247.934996	MAGPIPKIIVTAPZEE	Kd	143.1261928	27.28841189	5.244944021	0.001929171	IPKIIVTAPZEE	24	full	34234.14086	full_calibration.csv	0.006986841	0.00133211	1	0.143126193	0.027288412	4.477226197	0	0.446138576	4.487648272	0.65781995	-2.618951582	0.19467931	-2.737791402	0.194697699	-4.952686176	1.075285429	-3.129196347	0.21757381	6.038548142	1.175580387
1544	31947.85354	2000	28399	9970.45964	9	0.377327489	3525.089811	MAGPIPKIIVTAPZEE	Kd	143.1261928	27.28841189	5.244944021	0.001929171	IPKIIVTAPZEE	24	full	34234.14086	full_calibration.csv	0.006986841	0.00133211	2	0.143126193	0.027288412	4.453303048	0.301029996	0.446138576	4.487648272	0.65781995	-2.618951582	0.19467931	-2.737791402	0.194697699	-4.952686176	1.075285429	-3.129196347	0.21757381	6.038548142	1.175580387
1545	7497.345633	32	5371	2462.280405	37	0.448551386	410.3800676	MAGPVPRIIITKPZEE	Kd	114.1173809	21.286979	5.360900711	0.001726639	VPRIIITKPZEE	25	full	34234.14086	full_calibration.csv	0.008762907	0.001634596	0.032	0.114117381	0.021286979	3.730055152	-1.494850022	0.389886063	4.512997357	0.763554725	-2.753265568	0.190642294	-2.872105388	0.190661073	-5.087000161	1.074561866	-3.263510332	0.213969188	4.814655409	0.917876953
1546	12176.95781	63	15646.25	6177.633946	34	0.396418849	1075.388037	MAGPVPRIIITKPZEE	Kd	114.1173809	21.286979	5.360900711	0.001726639	VPRIIITKPZEE	25	full	34234.14086	full_calibration.csv	0.008762907	0.001634596	0.063	0.114117381	0.021286979	4.194410265	-1.200659451	0.389886063	4.512997357	0.763554725	-2.753265568	0.190642294	-2.872105388	0.190661073	-5.087000161	1.074561866	-3.263510332	0.213969188	4.814655409	0.917876953
1547	17896.09602	125	15237.5	5394.978177	34	0.365402751	939.145155	MAGPVPRIIITKPZEE	Kd	114.1173809	21.286979	5.360900711	0.001726639	VPRIIITKPZEE	25	full	34234.14086	full_calibration.csv	0.008762907	0.001634596	0.125	0.114117381	0.021286979	4.182913719	-0.903089987	0.389886063	4.512997357	0.763554725	-2.753265568	0.190642294	-2.872105388	0.190661073	-5.087000161	1.074561866	-3.263510332	0.213969188	4.814655409	0.917876953
1548	23504.87965	250	21428	5262.069013	33	0.249764692	930.2111706	MAGPVPRIIITKPZEE	Kd	114.1173809	21.286979	5.360900711	0.001726639	VPRIIITKPZEE	25	full	34234.14086	full_calibration.csv	0.008762907	0.001634596	0.25	0.114117381	0.021286979	4.330981638	-0.602059991	0.389886063	4.512997357	0.763554725	-2.753265568	0.190642294	-2.872105388	0.190661073	-5.087000161	1.074561866	-3.263510332	0.213969188	4.814655409	0.917876953
1549	27872.63634	500	30226	7294.44915	36	0.235215236	1232.986947	MAGPVPRIIITKPZEE	Kd	114.1173809	21.286979	5.360900711	0.001726639	VPRIIITKPZEE	25	full	34234.14086	full_calibration.csv	0.008762907	0.001634596	0.5	0.114117381	0.021286979	4.480380678	-0.301029996	0.389886063	4.512997357	0.763554725	-2.753265568	0.190642294	-2.872105388	0.190661073	-5.087000161	1.074561866	-3.263510332	0.213969188	4.814655409	0.917876953
1550	30727.58889	1000	35091	10335.90458	46	0.294734539	1540.785683	MAGPVPRIIITKPZEE	Kd	114.1173809	21.286979	5.360900711	0.001726639	VPRIIITKPZEE	25	full	34234.14086	full_calibration.csv	0.008762907	0.001634596	1	0.114117381	0.021286979	4.545195745	0	0.389886063	4.512997357	0.763554725	-2.753265568	0.190642294	-2.872105388	0.190661073	-5.087000161	1.074561866	-3.263510332	0.213969188	4.814655409	0.917876953
1551	32386.22526	2000	30850.75	8084.138734	40	0.255279657	1294.498211	MAGPVPRIIITKPZEE	Kd	114.1173809	21.286979	5.360900711	0.001726639	VPRIIITKPZEE	25	full	34234.14086	full_calibration.csv	0.008762907	0.001634596	2	0.114117381	0.021286979	4.489265726	0.301029996	0.389886063	4.512997357	0.763554725	-2.753265568	0.190642294	-2.872105388	0.190661073	-5.087000161	1.074561866	-3.263510332	0.213969188	4.814655409	0.917876953
1552	9296.808898	32	6886.75	2194.294253	36	0.312824476	370.9034248	MAGPVPRIVITAPZEE	Kd	85.83532602	14.21249824	6.039425624	0.000931926	VPRIVITAPZEE	26	full	34234.14086	full_calibration.csv	0.011650215	0.001929027	0.032	0.085835326	0.014212498	3.838014318	-1.494850022	0.360464756	4.545195349	0.820079739	-2.922150147	0.170191555	-3.040989967	0.17021259	-5.25588474	1.071122722	-3.432394911	0.195968095	3.62142483	0.616335924
1553	14490.85329	63	16411	4202.882538	15	0.291517966	1123.267607	MAGPVPRIVITAPZEE	Kd	85.83532602	14.21249824	6.039425624	0.000931926	VPRIVITAPZEE	26	full	34234.14086	full_calibration.csv	0.011650215	0.001929027	0.063	0.085835326	0.014212498	4.215135045	-1.200659451	0.360464756	4.545195349	0.820079739	-2.922150147	0.170191555	-3.040989967	0.17021259	-5.25588474	1.071122722	-3.432394911	0.195968095	3.62142483	0.616335924
1554	20296.72962	125	18472.5	4987.542554	20	0.266189312	1144.220735	MAGPVPRIVITAPZEE	Kd	85.83532602	14.21249824	6.039425624	0.000931926	VPRIVITAPZEE	26	full	34234.14086	full_calibration.csv	0.011650215	0.001929027	0.125	0.085835326	0.014212498	4.266525675	-0.903089987	0.360464756	4.545195349	0.820079739	-2.922150147	0.170191555	-3.040989967	0.17021259	-5.25588474	1.071122722	-3.432394911	0.195968095	3.62142483	0.616335924
1555	25484.32089	250	25892	4529.386078	47	0.179291207	667.8215435	MAGPVPRIVITAPZEE	Kd	85.83532602	14.21249824	6.039425624	0.000931926	VPRIVITAPZEE	26	full	34234.14086	full_calibration.csv	0.011650215	0.001929027	0.25	0.085835326	0.014212498	4.413165598	-0.602059991	0.360464756	4.545195349	0.820079739	-2.922150147	0.170191555	-3.040989967	0.17021259	-5.25588474	1.071122722	-3.432394911	0.195968095	3.62142483	0.616335924
1556	29218.22852	500	28736.5	7393.039858	20	0.250725409	1696.079665	MAGPVPRIVITAPZEE	Kd	85.83532602	14.21249824	6.039425624	0.000931926	VPRIVITAPZEE	26	full	34234.14086	full_calibration.csv	0.011650215	0.001929027	0.5	0.085835326	0.014212498	4.458433872	-0.301029996	0.360464756	4.545195349	0.820079739	-2.922150147	0.170191555	-3.040989967	0.17021259	-5.25588474	1.071122722	-3.432394911	0.195968095	3.62142483	0.616335924
1557	31527.93065	1000	35568	6764.14597	29	0.192773208	1278.303433	MAGPVPRIVITAPZEE	Kd	85.83532602	14.21249824	6.039425624	0.000931926	VPRIVITAPZEE	26	full	34234.14086	full_calibration.csv	0.011650215	0.001929027	1	0.085835326	0.014212498	4.551059445	0	0.360464756	4.545195349	0.820079739	-2.922150147	0.170191555	-3.040989967	0.17021259	-5.25588474	1.071122722	-3.432394911	0.195968095	3.62142483	0.616335924
1558	32825.3534	2000	36294.75	9294.940961	46	0.260426401	1385.607989	MAGPVPRIVITAPZEE	Kd	85.83532602	14.21249824	6.039425624	0.000931926	VPRIVITAPZEE	26	full	34234.14086	full_calibration.csv	0.011650215	0.001929027	2	0.085835326	0.014212498	4.559843809	0.301029996	0.360464756	4.545195349	0.820079739	-2.922150147	0.170191555	-3.040989967	0.17021259	-5.25588474	1.071122722	-3.432394911	0.195968095	3.62142483	0.616335924
1559	2111.51639	32	4199	422.6936581	7	0.098507028	172.5639633	MAGPIPKIIITYPZEE	Kd	486.8179038	75.42167736	6.454615182	0.000655295	IPKIIITYPZEE	27	full	34234.14086	full_calibration.csv	0.002054156	0.000318246	0.032	0.486817904	0.075421677	3.623145875	-1.494850022	0.429505172	4.31508998	0.935232861	-1.893022668	0.159848454	-2.011862488	0.15987085	-4.226757261	1.069528049	-2.403267432	0.18705576	20.53903126	3.283132395
1560	3922.663957	63	7039	4053.620323	3	0.734995072	2866.342419	MAGPIPKIIITYPZEE	Kd	486.8179038	75.42167736	6.454615182	0.000655295	IPKIIITYPZEE	27	full	34234.14086	full_calibration.csv	0.002054156	0.000318246	0.063	0.486817904	0.075421677	3.847510965	-1.200659451	0.429505172	4.31508998	0.935232861	-1.893022668	0.159848454	-2.011862488	0.15987085	-4.226757261	1.069528049	-2.403267432	0.18705576	20.53903126	3.283132395
1561	6994.34845	125	7106	2566.088845	5	0.325798769	1283.044422	MAGPIPKIIITYPZEE	Kd	486.8179038	75.42167736	6.454615182	0.000655295	IPKIIITYPZEE	27	full	34234.14086	full_calibration.csv	0.002054156	0.000318246	0.125	0.486817904	0.075421677	3.851625203	-0.903089987	0.429505172	4.31508998	0.935232861	-1.893022668	0.159848454	-2.011862488	0.15987085	-4.226757261	1.069528049	-2.403267432	0.18705576	20.53903126	3.283132395
1562	11615.53644	250	13247.75	3316.539727	10	0.26579523	1105.513242	MAGPIPKIIITYPZEE	Kd	486.8179038	75.42167736	6.454615182	0.000655295	IPKIIITYPZEE	27	full	34234.14086	full_calibration.csv	0.002054156	0.000318246	0.25	0.486817904	0.075421677	4.122142124	-0.602059991	0.429505172	4.31508998	0.935232861	-1.893022668	0.159848454	-2.011862488	0.15987085	-4.226757261	1.069528049	-2.403267432	0.18705576	20.53903126	3.283132395
1563	17345.72342	500	18221.5	205.5	2	0.011419522	205.5	MAGPIPKIIITYPZEE	Kd	486.8179038	75.42167736	6.454615182	0.000655295	IPKIIITYPZEE	27	full	34234.14086	full_calibration.csv	0.002054156	0.000318246	0.5	0.486817904	0.075421677	4.260584125	-0.301029996	0.429505172	4.31508998	0.935232861	-1.893022668	0.159848454	-2.011862488	0.15987085	-4.226757261	1.069528049	-2.403267432	0.18705576	20.53903126	3.283132395
1564	23025.10669	1000	21311.25	2255.85287	8	0.112734163	852.6322413	MAGPIPKIIITYPZEE	Kd	486.8179038	75.42167736	6.454615182	0.000655295	IPKIIITYPZEE	27	full	34234.14086	full_calibration.csv	0.002054156	0.000318246	1	0.486817904	0.075421677	4.328608924	0	0.429505172	4.31508998	0.935232861	-1.893022668	0.159848454	-2.011862488	0.15987085	-4.226757261	1.069528049	-2.403267432	0.18705576	20.53903126	3.283132395
1565	27532.48704	2000	23324.25	4785.79996	10	0.216159329	1595.266653	MAGPIPKIIITYPZEE	Kd	486.8179038	75.42167736	6.454615182	0.000655295	IPKIIITYPZEE	27	full	34234.14086	full_calibration.csv	0.002054156	0.000318246	2	0.486817904	0.075421677	4.367807688	0.301029996	0.429505172	4.31508998	0.935232861	-1.893022668	0.159848454	-2.011862488	0.15987085	-4.226757261	1.069528049	-2.403267432	0.18705576	20.53903126	3.283132395
1566	39.05439681	32	219.25	34.83452949	18	8.360287076	8.448614382	KRMEPIAIIITDTEIS	Kd	28018.42702	2936.887441	9.540177342	7.57E-05	KRMEPIAIIITDTEIS	28	full	34234.14086	full_calibration.csv	3.57E-05	3.74E-06	0.032	28.01842702	2.936887441	2.340939602	-1.494850022	0.514583319	3.067746164	0.79955441	0.510244764	0.111964614	0.391404944	0.111996585	-1.823489829	1.06342597	0	0.14823766	1182.10802	132.3542681
1567	76.80346418	63	275.25	64.43583964	12	1.35062022	19.42813665	KRMEPIAIIITDTEIS	Kd	28018.42702	2936.887441	9.540177342	7.57E-05	KRMEPIAIIITDTEIS	28	full	34234.14086	full_calibration.csv	3.57E-05	3.74E-06	0.063	28.01842702	2.936887441	2.439727328	-1.200659451	0.514583319	3.067746164	0.79955441	0.510244764	0.111964614	0.391404944	0.111996585	-1.823489829	1.06342597	0	0.14823766	1182.10802	132.3542681
1568	152.0521152	125	466.25	85.75	2	0.356919875	85.75	KRMEPIAIIITDTEIS	Kd	28018.42702	2936.887441	9.540177342	7.57E-05	KRMEPIAIIITDTEIS	28	full	34234.14086	full_calibration.csv	3.57E-05	3.74E-06	0.125	28.01842702	2.936887441	2.668618845	-0.903089987	0.514583319	3.067746164	0.79955441	0.510244764	0.111964614	0.391404944	0.111996585	-1.823489829	1.06342597	0	0.14823766	1182.10802	132.3542681
1569	302.7595136	250	616	110.5327299	8	0.304812768	41.777445	KRMEPIAIIITDTEIS	Kd	28018.42702	2936.887441	9.540177342	7.57E-05	KRMEPIAIIITDTEIS	28	full	34234.14086	full_calibration.csv	3.57E-05	3.74E-06	0.25	28.01842702	2.936887441	2.789580712	-0.602059991	0.514583319	3.067746164	0.79955441	0.510244764	0.111964614	0.391404944	0.111996585	-1.823489829	1.06342597	0	0.14823766	1182.10802	132.3542681
1570	600.2108888	500	385.5	281.2	5	0.934529744	140.6	KRMEPIAIIITDTEIS	Kd	28018.42702	2936.887441	9.540177342	7.57E-05	KRMEPIAIIITDTEIS	28	full	34234.14086	full_calibration.csv	3.57E-05	3.74E-06	0.5	28.01842702	2.936887441	2.586024382	-0.301029996	0.514583319	3.067746164	0.79955441	0.510244764	0.111964614	0.391404944	0.111996585	-1.823489829	1.06342597	0	0.14823766	1182.10802	132.3542681
1571	1179.737993	1000	1451.5	218.0491272	4	0.181991968	125.8907223	KRMEPIAIIITDTEIS	Kd	28018.42702	2936.887441	9.540177342	7.57E-05	KRMEPIAIIITDTEIS	28	full	34234.14086	full_calibration.csv	3.57E-05	3.74E-06	1	28.01842702	2.936887441	3.16181704	0	0.514583319	3.067746164	0.79955441	0.510244764	0.111964614	0.391404944	0.111996585	-1.823489829	1.06342597	0	0.14823766	1182.10802	132.3542681
1572	2280.875066	2000	2118	765.8467879	9	0.495390886	270.7677285	KRMEPIAIIITDTEIS	Kd	28018.42702	2936.887441	9.540177342	7.57E-05	KRMEPIAIIITDTEIS	28	full	34234.14086	full_calibration.csv	3.57E-05	3.74E-06	2	28.01842702	2.936887441	3.325925956	0.301029996	0.514583319	3.067746164	0.79955441	0.510244764	0.111964614	0.391404944	0.111996585	-1.823489829	1.06342597	0	0.14823766	1182.10802	132.3542681
1573	9.937155034	32	181.5	42.27587965	4	-0.971859302	24.40799049	KRMEPIPIIITDTEIS	Kd	110210.0666	28043.79633	3.929926795	0.007713393	KRMEPIPIIITDTEIS	29	full	34234.14086	full_calibration.csv	9.07E-06	2.31E-06	0.032	110.2100666	28.04379633	2.258876629	-1.494850022	0.243914068	2.587342293	0.89877786	1.322373587	0.257483158	1.203533767	0.257497062	-1.011361006	1.088409985	0.812128823	0.275201573	4649.804343	1197.246307
1574	19.5582742	63	211.5	33.93298517	24	-7.793221475	7.07551652	KRMEPIPIIITDTEIS	Kd	110210.0666	28043.79633	3.929926795	0.007713393	KRMEPIPIIITDTEIS	29	full	34234.14086	full_calibration.csv	9.07E-06	2.31E-06	0.063	110.2100666	28.04379633	2.325310372	-1.200659451	0.243914068	2.587342293	0.89877786	1.322373587	0.257483158	1.203533767	0.257497062	-1.011361006	1.088409985	0.812128823	0.275201573	4649.804343	1197.246307
1575	38.7842935	125	206.75	3.75	2	-0.194805195	3.75	KRMEPIPIIITDTEIS	Kd	110210.0666	28043.79633	3.929926795	0.007713393	KRMEPIPIIITDTEIS	29	full	34234.14086	full_calibration.csv	9.07E-06	2.31E-06	0.125	110.2100666	28.04379633	2.315445518	-0.903089987	0.243914068	2.587342293	0.89877786	1.322373587	0.257483158	1.203533767	0.257497062	-1.011361006	1.088409985	0.812128823	0.275201573	4649.804343	1197.246307
1576	77.480808	250	228.25	112.4209213	12	-899.3673702	33.89618313	KRMEPIPIIITDTEIS	Kd	110210.0666	28043.79633	3.929926795	0.007713393	KRMEPIPIIITDTEIS	29	full	34234.14086	full_calibration.csv	9.07E-06	2.31E-06	0.25	110.2100666	28.04379633	2.358410786	-0.602059991	0.243914068	2.587342293	0.89877786	1.322373587	0.257483158	1.203533767	0.257497062	-1.011361006	1.088409985	0.812128823	0.275201573	4649.804343	1197.246307
1577	154.6116893	500	343	517.3970308	4	1.281478714	298.719315	KRMEPIPIIITDTEIS	Kd	110210.0666	28043.79633	3.929926795	0.007713393	KRMEPIPIIITDTEIS	29	full	34234.14086	full_calibration.csv	9.07E-06	2.31E-06	0.5	110.2100666	28.04379633	2.53529412	-0.301029996	0.243914068	2.587342293	0.89877786	1.322373587	0.257483158	1.203533767	0.257497062	-1.011361006	1.088409985	0.812128823	0.275201573	4649.804343	1197.246307
1578	307.8331116	1000	424.5	1293.920585	6	1.686439341	578.6588769	KRMEPIPIIITDTEIS	Kd	110210.0666	28043.79633	3.929926795	0.007713393	KRMEPIPIIITDTEIS	29	full	34234.14086	full_calibration.csv	9.07E-06	2.31E-06	1	110.2100666	28.04379633	2.627877695	0	0.243914068	2.587342293	0.89877786	1.322373587	0.257483158	1.203533767	0.257497062	-1.011361006	1.088409985	0.812128823	0.275201573	4649.804343	1197.246307
1579	610.1794943	2000	463	112.8605334	5	0.383879365	56.4302667	KRMEPIPIIITDTEIS	Kd	110210.0666	28043.79633	3.929926795	0.007713393	KRMEPIPIIITDTEIS	29	full	34234.14086	full_calibration.csv	9.07E-06	2.31E-06	2	110.2100666	28.04379633	2.665580991	0.301029996	0.243914068	2.587342293	0.89877786	1.322373587	0.257483158	1.203533767	0.257497062	-1.011361006	1.088409985	0.812128823	0.275201573	4649.804343	1197.246307
1580	67.74617792	32	168.25	16.59207266	4	-0.306550996	9.579437614	KRMEPPAIIITDTEIS	Kd	16138.54336	1923.702793	8.389312226	0.000156165	KRMEPPAIIITDTEIS	30	full	34234.14086	full_calibration.csv	6.20E-05	7.39E-06	0.032	16.13854336	1.923702793	2.225955073	-1.494850022	0.793690901	3.354242496	0.970657349	0.183115133	0.125528251	0.064275312	0.125556769	-2.150619461	1.064939464	-0.327129632	0.158731443	680.8912408	85.47108686
1581	133.1200878	63	220	29.05752914	5	-12.10730381	14.52876457	KRMEPPAIIITDTEIS	Kd	16138.54336	1923.702793	8.389312226	0.000156165	KRMEPPAIIITDTEIS	30	full	34234.14086	full_calibration.csv	6.20E-05	7.39E-06	0.063	16.13854336	1.923702793	2.342422681	-1.200659451	0.793690901	3.354242496	0.970657349	0.183115133	0.125528251	0.064275312	0.125556769	-2.150619461	1.064939464	-0.327129632	0.158731443	680.8912408	85.47108686
1582	263.1202508	125	359	27.34849173	5	0.207815287	13.67424587	KRMEPPAIIITDTEIS	Kd	16138.54336	1923.702793	8.389312226	0.000156165	KRMEPPAIIITDTEIS	30	full	34234.14086	full_calibration.csv	6.20E-05	7.39E-06	0.125	16.13854336	1.923702793	2.555094449	-0.903089987	0.793690901	3.354242496	0.970657349	0.183115133	0.125528251	0.064275312	0.125556769	-2.150619461	1.064939464	-0.327129632	0.158731443	680.8912408	85.47108686
1583	522.2267182	250	747.25	259.5634255	8	0.615991517	98.10575334	KRMEPPAIIITDTEIS	Kd	16138.54336	1923.702793	8.389312226	0.000156165	KRMEPPAIIITDTEIS	30	full	34234.14086	full_calibration.csv	6.20E-05	7.39E-06	0.25	16.13854336	1.923702793	2.873465924	-0.602059991	0.793690901	3.354242496	0.970657349	0.183115133	0.125528251	0.064275312	0.125556769	-2.150619461	1.064939464	-0.327129632	0.158731443	680.8912408	85.47108686
1584	1028.760154	500	1653	380.396911	11	0.260116621	120.2920654	KRMEPPAIIITDTEIS	Kd	16138.54336	1923.702793	8.389312226	0.000156165	KRMEPPAIIITDTEIS	30	full	34234.14086	full_calibration.csv	6.20E-05	7.39E-06	0.5	16.13854336	1.923702793	3.218272854	-0.301029996	0.793690901	3.354242496	0.970657349	0.183115133	0.125528251	0.064275312	0.125556769	-2.150619461	1.064939464	-0.327129632	0.158731443	680.8912408	85.47108686
1585	1997.494194	1000	2712	761.3918977	20	0.28833776	174.675281	KRMEPPAIIITDTEIS	Kd	16138.54336	1923.702793	8.389312226	0.000156165	KRMEPPAIIITDTEIS	30	full	34234.14086	full_calibration.csv	6.20E-05	7.39E-06	1	16.13854336	1.923702793	3.433289685	0	0.793690901	3.354242496	0.970657349	0.183115133	0.125528251	0.064275312	0.125556769	-2.150619461	1.064939464	-0.327129632	0.158731443	680.8912408	85.47108686
1586	3774.73981	2000	3141.75	1033.25	2	0.354368516	1033.25	KRMEPPAIIITDTEIS	Kd	16138.54336	1923.702793	8.389312226	0.000156165	KRMEPPAIIITDTEIS	30	full	34234.14086	full_calibration.csv	6.20E-05	7.39E-06	2	16.13854336	1.923702793	3.497171624	0.301029996	0.793690901	3.354242496	0.970657349	0.183115133	0.125528251	0.064275312	0.125556769	-2.150619461	1.064939464	-0.327129632	0.158731443	680.8912408	85.47108686
1587	22.44260071	32	193	31.74375017	42	-1.026752027	4.95754088	KRMEPIAIYITDTEIS	Kd	48781.08193	6324.437427	7.713110059	0.000249031	KRMEPIAIYITDTEIS	31	full	34234.14086	full_calibration.csv	2.05E-05	2.66E-06	0.032	48.78108193	6.324437427	2.285557309	-1.494850022	0.451012758	2.895998118	0.963757489	0.839051506	0.135491095	0.720211685	0.135517516	-1.494683088	1.066159724	0.328806741	0.166721821	2058.092274	278.8531753
1588	44.15582786	63	236.25	50.14909645	20	3.326639897	11.50499177	KRMEPIAIYITDTEIS	Kd	48781.08193	6324.437427	7.713110059	0.000249031	KRMEPIAIYITDTEIS	31	full	34234.14086	full_calibration.csv	2.05E-05	2.66E-06	0.063	48.78108193	6.324437427	2.373371817	-1.200659451	0.451012758	2.895998118	0.963757489	0.839051506	0.135491095	0.720211685	0.135517516	-1.494683088	1.066159724	0.328806741	0.166721821	2058.092274	278.8531753
1589	87.49970225	125	249.25	49.29110672	28	1.469027129	9.486077911	KRMEPIAIYITDTEIS	Kd	48781.08193	6324.437427	7.713110059	0.000249031	KRMEPIAIYITDTEIS	31	full	34234.14086	full_calibration.csv	2.05E-05	2.66E-06	0.125	48.78108193	6.324437427	2.396635167	-0.903089987	0.451012758	2.895998118	0.963757489	0.839051506	0.135491095	0.720211685	0.135517516	-1.494683088	1.066159724	0.328806741	0.166721821	2058.092274	278.8531753
1590	174.5532604	250	393	95.39842636	37	0.647837345	15.89973773	KRMEPIAIYITDTEIS	Kd	48781.08193	6324.437427	7.713110059	0.000249031	KRMEPIAIYITDTEIS	31	full	34234.14086	full_calibration.csv	2.05E-05	2.66E-06	0.25	48.78108193	6.324437427	2.59439255	-0.602059991	0.451012758	2.895998118	0.963757489	0.839051506	0.135491095	0.720211685	0.135517516	-1.494683088	1.066159724	0.328806741	0.166721821	2058.092274	278.8531753
1591	347.3355242	500	552.5	137.0701599	24	0.398146304	28.58110407	KRMEPIAIYITDTEIS	Kd	48781.08193	6324.437427	7.713110059	0.000249031	KRMEPIAIYITDTEIS	31	full	34234.14086	full_calibration.csv	2.05E-05	2.66E-06	0.5	48.78108193	6.324437427	2.742332282	-0.301029996	0.451012758	2.895998118	0.963757489	0.839051506	0.135491095	0.720211685	0.135517516	-1.494683088	1.066159724	0.328806741	0.166721821	2058.092274	278.8531753
1592	687.693789	1000	823.5	196.5680409	30	0.338842258	36.50176884	KRMEPIAIYITDTEIS	Kd	48781.08193	6324.437427	7.713110059	0.000249031	KRMEPIAIYITDTEIS	31	full	34234.14086	full_calibration.csv	2.05E-05	2.66E-06	1	48.78108193	6.324437427	2.915663604	0	0.451012758	2.895998118	0.963757489	0.839051506	0.135491095	0.720211685	0.135517516	-1.494683088	1.066159724	0.328806741	0.166721821	2058.092274	278.8531753
1593	1348.302933	2000	1173.5	288.5726795	27	0.301416366	56.59375861	KRMEPIAIYITDTEIS	Kd	48781.08193	6324.437427	7.713110059	0.000249031	KRMEPIAIYITDTEIS	31	full	34234.14086	full_calibration.csv	2.05E-05	2.66E-06	2	48.78108193	6.324437427	3.069483094	0.301029996	0.451012758	2.895998118	0.963757489	0.839051506	0.135491095	0.720211685	0.135517516	-1.494683088	1.066159724	0.328806741	0.166721821	2058.092274	278.8531753
1594	294.9158695	32	309	90.11413249	20	0.719905193	20.67359984	KRMEPIAIIITRTEIS	Kd	3682.593281	117.1215166	31.44249997	6.88E-08	KRMEPIAIIITRTEIS	32	full	34234.14086	full_calibration.csv	0.000271548	8.64E-06	0.032	3.682593281	0.117121517	2.489958479	-1.494850022	0.887667983	3.829274961	0.997075926	-0.69309764	0.050600127	-0.81193746	0.050670832	-3.026832234	1.058725221	-1.203342405	0.109538586	155.3700017	7.86174179
1595	575.8102154	63	650.5	163.6226959	38	0.412708668	26.8994055	KRMEPIAIIITRTEIS	Kd	3682.593281	117.1215166	31.44249997	6.88E-08	KRMEPIAIIITRTEIS	32	full	34234.14086	full_calibration.csv	0.000271548	8.64E-06	0.063	3.682593281	0.117121517	2.813247301	-1.200659451	0.887667983	3.829274961	0.997075926	-0.69309764	0.050600127	-0.81193746	0.050670832	-3.026832234	1.058725221	-1.203342405	0.109538586	155.3700017	7.86174179
1596	1123.877287	125	1021	304.6014486	45	0.345022785	45.92039616	KRMEPIAIIITRTEIS	Kd	3682.593281	117.1215166	31.44249997	6.88E-08	KRMEPIAIIITRTEIS	32	full	34234.14086	full_calibration.csv	0.000271548	8.64E-06	0.125	3.682593281	0.117121517	3.009025742	-0.903089987	0.887667983	3.829274961	0.997075926	-0.69309764	0.050600127	-0.81193746	0.050670832	-3.026832234	1.058725221	-1.203342405	0.109538586	155.3700017	7.86174179
1597	2176.308253	250	1805	566.3298464	37	0.330078436	94.38830773	KRMEPIAIIITRTEIS	Kd	3682.593281	117.1215166	31.44249997	6.88E-08	KRMEPIAIIITRTEIS	32	full	34234.14086	full_calibration.csv	0.000271548	8.64E-06	0.25	3.682593281	0.117121517	3.256477206	-0.602059991	0.887667983	3.829274961	0.997075926	-0.69309764	0.050600127	-0.81193746	0.050670832	-3.026832234	1.058725221	-1.203342405	0.109538586	155.3700017	7.86174179
1598	4092.453958	500	3629.75	1189.522429	36	0.332928854	201.0659884	KRMEPIAIIITRTEIS	Kd	3682.593281	117.1215166	31.44249997	6.88E-08	KRMEPIAIIITRTEIS	32	full	34234.14086	full_calibration.csv	0.000271548	8.64E-06	0.5	3.682593281	0.117121517	3.559876714	-0.301029996	0.887667983	3.829274961	0.997075926	-0.69309764	0.050600127	-0.81193746	0.050670832	-3.026832234	1.058725221	-1.203342405	0.109538586	155.3700017	7.86174179
1599	7310.936228	1000	7060.5	1774.950017	45	0.259404597	267.5837831	KRMEPIAIIITRTEIS	Kd	3682.593281	117.1215166	31.44249997	6.88E-08	KRMEPIAIIITRTEIS	32	full	34234.14086	full_calibration.csv	0.000271548	8.64E-06	1	3.682593281	0.117121517	3.848835457	0	0.887667983	3.829274961	0.997075926	-0.69309764	0.050600127	-0.81193746	0.050670832	-3.026832234	1.058725221	-1.203342405	0.109538586	155.3700017	7.86174179
1600	12048.77392	2000	12552	4442.516261	38	0.326432953	730.3451745	KRMEPIAIIITRTEIS	Kd	3682.593281	117.1215166	31.44249997	6.88E-08	KRMEPIAIIITRTEIS	32	full	34234.14086	full_calibration.csv	0.000271548	8.64E-06	2	3.682593281	0.117121517	4.098712931	0.301029996	0.887667983	3.829274961	0.997075926	-0.69309764	0.050600127	-0.81193746	0.050670832	-3.026832234	1.058725221	-1.203342405	0.109538586	155.3700017	7.86174179
1601	109.1342542	32	266.75	43.92665501	14	1.07512792	12.18306208	KRMEPIAIIITKTEIS	Kd	10006.02624	445.1825901	22.4762299	5.08E-07	KRMEPIAIIITKTEIS	33	full	34234.14086	full_calibration.csv	9.99E-05	4.45E-06	0.032	10.00602624	0.44518259	2.426104428	-1.494850022	0.751936979	3.497928982	0.985561013	-0.100352431	0.059400015	-0.219192251	0.059460257	-2.434087025	1.05918227	-0.610597196	0.113871378	422.1580269	25.07619314
1602	214.1965689	63	419	81.5552051	13	0.515168934	23.54295981	KRMEPIAIIITKTEIS	Kd	10006.02624	445.1825901	22.4762299	5.08E-07	KRMEPIAIIITKTEIS	33	full	34234.14086	full_calibration.csv	9.99E-05	4.45E-06	0.063	10.00602624	0.44518259	2.622214023	-1.200659451	0.751936979	3.497928982	0.985561013	-0.100352431	0.059400015	-0.219192251	0.059460257	-2.434087025	1.05918227	-0.610597196	0.113871378	422.1580269	25.07619314
1603	422.3923129	125	518	225.6741827	21	0.792832762	50.46228133	KRMEPIAIIITKTEIS	Kd	10006.02624	445.1825901	22.4762299	5.08E-07	KRMEPIAIIITKTEIS	33	full	34234.14086	full_calibration.csv	9.99E-05	4.45E-06	0.125	10.00602624	0.44518259	2.71432976	-0.903089987	0.751936979	3.497928982	0.985561013	-0.100352431	0.059400015	-0.219192251	0.059460257	-2.434087025	1.05918227	-0.610597196	0.113871378	422.1580269	25.07619314
1604	834.4884276	250	1019.5	238.3022369	34	0.314254865	41.4830948	KRMEPIAIIITKTEIS	Kd	10006.02624	445.1825901	22.4762299	5.08E-07	KRMEPIAIIITKTEIS	33	full	34234.14086	full_calibration.csv	9.99E-05	4.45E-06	0.25	10.00602624	0.44518259	3.00838723	-0.602059991	0.751936979	3.497928982	0.985561013	-0.100352431	0.059400015	-0.219192251	0.059460257	-2.434087025	1.05918227	-0.610597196	0.113871378	422.1580269	25.07619314
1605	1629.262104	500	1987.5	584.5928996	23	0.327140465	124.635625	KRMEPIAIIITKTEIS	Kd	10006.02624	445.1825901	22.4762299	5.08E-07	KRMEPIAIIITKTEIS	33	full	34234.14086	full_calibration.csv	9.99E-05	4.45E-06	0.5	10.00602624	0.44518259	3.298307137	-0.301029996	0.751936979	3.497928982	0.985561013	-0.100352431	0.059400015	-0.219192251	0.059460257	-2.434087025	1.05918227	-0.610597196	0.113871378	422.1580269	25.07619314
1606	3110.490571	1000	3360.5	826.6344508	14	0.261209396	229.267146	KRMEPIAIIITKTEIS	Kd	10006.02624	445.1825901	22.4762299	5.08E-07	KRMEPIAIIITKTEIS	33	full	34234.14086	full_calibration.csv	9.99E-05	4.45E-06	1	10.00602624	0.44518259	3.5264039	0	0.751936979	3.497928982	0.985561013	-0.100352431	0.059400015	-0.219192251	0.059460257	-2.434087025	1.05918227	-0.610597196	0.113871378	422.1580269	25.07619314
1607	5702.826258	2000	5384.25	2146.571475	28	0.406320886	413.1078729	KRMEPIAIIITKTEIS	Kd	10006.02624	445.1825901	22.4762299	5.08E-07	KRMEPIAIIITKTEIS	33	full	34234.14086	full_calibration.csv	9.99E-05	4.45E-06	2	10.00602624	0.44518259	3.731125217	0.301029996	0.751936979	3.497928982	0.985561013	-0.100352431	0.059400015	-0.219192251	0.059460257	-2.434087025	1.05918227	-0.610597196	0.113871378	422.1580269	25.07619314
1608	65.50679665	32	241	41.65603946	21	1.583306477	9.314573591	KRMEPIAIIITDTTIS	Kd	16691.34114	1745.383346	9.563137623	7.47E-05	KRMEPIAIIITDTTIS	34	full	34234.14086	full_calibration.csv	5.99E-05	6.26E-06	0.032	16.69134114	1.745383346	2.382017043	-1.494850022	0.619617076	3.345291885	0.994614007	0.203087184	0.111729045	0.084247364	0.111761084	-2.13064741	1.063401194	-0.307157581	0.148059814	704.213988	78.68115616
1609	128.7278835	63	428.5	67.22602802	11	0.338747736	21.25873666	KRMEPIAIIITDTTIS	Kd	16691.34114	1745.383346	9.563137623	7.47E-05	KRMEPIAIIITDTTIS	34	full	34234.14086	full_calibration.csv	5.99E-05	6.26E-06	0.063	16.69134114	1.745383346	2.631950826	-1.200659451	0.619617076	3.345291885	0.994614007	0.203087184	0.111729045	0.084247364	0.111761084	-2.13064741	1.063401194	-0.307157581	0.148059814	704.213988	78.68115616
1610	254.4707895	125	611.5	74.4870212	7	0.192508454	30.40919906	KRMEPIAIIITDTTIS	Kd	16691.34114	1745.383346	9.563137623	7.47E-05	KRMEPIAIIITDTTIS	34	full	34234.14086	full_calibration.csv	5.99E-05	6.26E-06	0.125	16.69134114	1.745383346	2.786396461	-0.903089987	0.619617076	3.345291885	0.994614007	0.203087184	0.111729045	0.084247364	0.111761084	-2.13064741	1.063401194	-0.307157581	0.148059814	704.213988	78.68115616
1611	505.1864042	250	994.5	163.3985618	10	0.204734447	54.46618727	KRMEPIAIIITDTTIS	Kd	16691.34114	1745.383346	9.563137623	7.47E-05	KRMEPIAIIITDTTIS	34	full	34234.14086	full_calibration.csv	5.99E-05	6.26E-06	0.25	16.69134114	1.745383346	2.997604787	-0.602059991	0.619617076	3.345291885	0.994614007	0.203087184	0.111729045	0.084247364	0.111761084	-2.13064741	1.063401194	-0.307157581	0.148059814	704.213988	78.68115616
1612	995.6797604	500	1388.25	228.5928336	16	0.183691695	59.02241585	KRMEPIAIIITDTTIS	Kd	16691.34114	1745.383346	9.563137623	7.47E-05	KRMEPIAIIITDTTIS	34	full	34234.14086	full_calibration.csv	5.99E-05	6.26E-06	0.5	16.69134114	1.745383346	3.142467682	-0.301029996	0.619617076	3.345291885	0.994614007	0.203087184	0.111729045	0.084247364	0.111761084	-2.13064741	1.063401194	-0.307157581	0.148059814	704.213988	78.68115616
1613	1935.078894	1000	2330.25	729.4454074	12	0.358501214	219.9360656	KRMEPIAIIITDTTIS	Kd	16691.34114	1745.383346	9.563137623	7.47E-05	KRMEPIAIIITDTTIS	34	full	34234.14086	full_calibration.csv	5.99E-05	6.26E-06	1	16.69134114	1.745383346	3.367402517	0	0.619617076	3.345291885	0.994614007	0.203087184	0.111729045	0.084247364	0.111761084	-2.13064741	1.063401194	-0.307157581	0.148059814	704.213988	78.68115616
1614	3663.101604	2000	3209.25	1036.390758	14	0.341034201	287.4430783	KRMEPIAIIITDTTIS	Kd	16691.34114	1745.383346	9.563137623	7.47E-05	KRMEPIAIIITDTTIS	34	full	34234.14086	full_calibration.csv	5.99E-05	6.26E-06	2	16.69134114	1.745383346	3.50640355	0.301029996	0.619617076	3.345291885	0.994614007	0.203087184	0.111729045	0.084247364	0.111761084	-2.13064741	1.063401194	-0.307157581	0.148059814	704.213988	78.68115616
1615	242.1331338	32	210.5	24.62519584	36	-2.367175034	4.162417807	KRMEPPKIIITDTEIS	Kd	4492.339524	214.5186187	20.94149007	7.72E-07	KRMEPPKIIITDTEIS	36	full	34234.14086	full_calibration.csv	0.000222601	1.06E-05	0.032	4.492339524	0.214518619	2.3232521	-1.494850022	0.946879819	3.768457001	0.970928258	-0.575235084	0.061880008	-0.694074904	0.061937838	-2.908969678	1.059324245	-1.085479849	0.11518448	189.5335015	11.72833455
1616	473.4555707	63	523	143.3276048	14	0.549072778	39.75192525	KRMEPPKIIITDTEIS	Kd	4492.339524	214.5186187	20.94149007	7.72E-07	KRMEPPKIIITDTEIS	36	full	34234.14086	full_calibration.csv	0.000222601	1.06E-05	0.063	4.492339524	0.214518619	2.718501689	-1.200659451	0.946879819	3.768457001	0.970928258	-0.575235084	0.061880008	-0.694074904	0.061937838	-2.908969678	1.059324245	-1.085479849	0.11518448	189.5335015	11.72833455
1617	926.7820972	125	827.5	283.6352559	25	0.501600919	57.89680417	KRMEPPKIIITDTEIS	Kd	4492.339524	214.5186187	20.94149007	7.72E-07	KRMEPPKIIITDTEIS	36	full	34234.14086	full_calibration.csv	0.000222601	1.06E-05	0.125	4.492339524	0.214518619	2.917768002	-0.903089987	0.946879819	3.768457001	0.970928258	-0.575235084	0.061880008	-0.694074904	0.061937838	-2.908969678	1.059324245	-1.085479849	0.11518448	189.5335015	11.72833455
1618	1804.707396	250	1049	488.7357588	44	0.52594004	74.53150449	KRMEPPKIIITDTEIS	Kd	4492.339524	214.5186187	20.94149007	7.72E-07	KRMEPPKIIITDTEIS	36	full	34234.14086	full_calibration.csv	0.000222601	1.06E-05	0.25	4.492339524	0.214518619	3.020775488	-0.602059991	0.946879819	3.768457001	0.970928258	-0.575235084	0.061880008	-0.694074904	0.061937838	-2.908969678	1.059324245	-1.085479849	0.11518448	189.5335015	11.72833455
1619	3428.66713	500	3794	1828.18356	27	0.452077226	358.5362941	KRMEPPKIIITDTEIS	Kd	4492.339524	214.5186187	20.94149007	7.72E-07	KRMEPPKIIITDTEIS	36	full	34234.14086	full_calibration.csv	0.000222601	1.06E-05	0.5	4.492339524	0.214518619	3.579097327	-0.301029996	0.946879819	3.768457001	0.970928258	-0.575235084	0.061880008	-0.694074904	0.061937838	-2.908969678	1.059324245	-1.085479849	0.11518448	189.5335015	11.72833455
1620	6233.070754	1000	6856.75	1653.043075	22	0.250446411	360.7235723	KRMEPPKIIITDTEIS	Kd	4492.339524	214.5186187	20.94149007	7.72E-07	KRMEPPKIIITDTEIS	36	full	34234.14086	full_calibration.csv	0.000222601	1.06E-05	1	4.492339524	0.214518619	3.836118315	0	0.946879819	3.768457001	0.970928258	-0.575235084	0.061880008	-0.694074904	0.061937838	-2.908969678	1.059324245	-1.085479849	0.11518448	189.5335015	11.72833455
1621	10546.01064	2000	10143	3947.54962	40	0.399134969	632.1138327	KRMEPPKIIITDTEIS	Kd	4492.339524	214.5186187	20.94149007	7.72E-07	KRMEPPKIIITDTEIS	36	full	34234.14086	full_calibration.csv	0.000222601	1.06E-05	2	4.492339524	0.214518619	4.006166425	0.301029996	0.946879819	3.768457001	0.970928258	-0.575235084	0.061880008	-0.694074904	0.061937838	-2.908969678	1.059324245	-1.085479849	0.11518448	189.5335015	11.72833455
1622	341.7910233	32	277	58.10366607	19	0.890657245	13.69516543	KRMEPPKIIITDTSIS	Kd	3173.152953	106.6108534	29.76388288	9.54E-08	KRMEPPKIIITDTSIS	37	full	34234.14086	full_calibration.csv	0.000315144	1.06E-05	0.032	3.173152953	0.106610853	2.442479769	-1.494850022	0.964216467	3.906007228	0.978917172	-0.78139029	0.051746332	-0.90023011	0.051815473	-3.115124884	1.058780621	-1.291635055	0.110072757	133.8765218	6.927618894
1623	666.4551724	63	463.75	140.2473262	8	0.549450837	53.00850673	KRMEPPKIIITDTSIS	Kd	3173.152953	106.6108534	29.76388288	9.54E-08	KRMEPPKIIITDTSIS	37	full	34234.14086	full_calibration.csv	0.000315144	1.06E-05	0.063	3.173152953	0.106610853	2.666283923	-1.200659451	0.964216467	3.906007228	0.978917172	-0.78139029	0.051746332	-0.90023011	0.051815473	-3.115124884	1.058780621	-1.291635055	0.110072757	133.8765218	6.927618894
1624	1297.473971	125	1424.75	669.8835101	28	0.481275198	128.9191416	KRMEPPKIIITDTSIS	Kd	3173.152953	106.6108534	29.76388288	9.54E-08	KRMEPPKIIITDTSIS	37	full	34234.14086	full_calibration.csv	0.000315144	1.06E-05	0.125	3.173152953	0.106610853	3.153738666	-0.903089987	0.964216467	3.906007228	0.978917172	-0.78139029	0.051746332	-0.90023011	0.051815473	-3.115124884	1.058780621	-1.291635055	0.110072757	133.8765218	6.927618894
1625	2500.190711	250	1876.25	721.6014821	34	0.440498598	125.6146945	KRMEPPKIIITDTSIS	Kd	3173.152953	106.6108534	29.76388288	9.54E-08	KRMEPPKIIITDTSIS	37	full	34234.14086	full_calibration.csv	0.000315144	1.06E-05	0.25	3.173152953	0.106610853	3.273290705	-0.602059991	0.964216467	3.906007228	0.978917172	-0.78139029	0.051746332	-0.90023011	0.051815473	-3.115124884	1.058780621	-1.291635055	0.110072757	133.8765218	6.927618894
1626	4660.04837	500	5244	2444.795422	18	0.545665897	592.9499857	KRMEPPKIIITDTSIS	Kd	3173.152953	106.6108534	29.76388288	9.54E-08	KRMEPPKIIITDTSIS	37	full	34234.14086	full_calibration.csv	0.000315144	1.06E-05	0.5	3.173152953	0.106610853	3.719662683	-0.301029996	0.964216467	3.906007228	0.978917172	-0.78139029	0.051746332	-0.90023011	0.051815473	-3.115124884	1.058780621	-1.291635055	0.110072757	133.8765218	6.927618894
1627	8203.423465	1000	8360	2137.866106	29	0.251704608	404.0187181	KRMEPPKIIITDTSIS	Kd	3173.152953	106.6108534	29.76388288	9.54E-08	KRMEPPKIIITDTSIS	37	full	34234.14086	full_calibration.csv	0.000315144	1.06E-05	1	3.173152953	0.106610853	3.922206277	0	0.964216467	3.906007228	0.978917172	-0.78139029	0.051746332	-0.90023011	0.051815473	-3.115124884	1.058780621	-1.291635055	0.110072757	133.8765218	6.927618894
1628	13235.30975	2000	13003	4442.061431	70	0.343877443	534.7613549	KRMEPPKIIITDTSIS	Kd	3173.152953	106.6108534	29.76388288	9.54E-08	KRMEPPKIIITDTSIS	37	full	34234.14086	full_calibration.csv	0.000315144	1.06E-05	2	3.173152953	0.106610853	4.114043563	0.301029996	0.964216467	3.906007228	0.978917172	-0.78139029	0.051746332	-0.90023011	0.051815473	-3.115124884	1.058780621	-1.291635055	0.110072757	133.8765218	6.927618894
1629	1276.557993	32	1548	864.5164313	15	0.595069129	231.0517351	ASGLLPRIIITPPYEL	Kd	826.1611753	92.15704066	8.96471034	0.000107628	ASGLLPRIIITPPYEL	38	full	34234.14086	full_calibration.csv	0.001210418	0.00013502	0.032	0.826161175	0.092157041	3.189770956	-1.494850022	0.590635554	4.259810062	0.915004148	-1.57938512	0.118287535	-1.69822494	0.118317798	-3.913119714	1.064110267	-2.089629885	0.153069494	34.85605208	4.123036484
1630	2425.601718	63	4915	2456.02478	43	0.46606868	378.9728511	ASGLLPRIIITPPYEL	Kd	826.1611753	92.15704066	8.96471034	0.000107628	ASGLLPRIIITPPYEL	38	full	34234.14086	full_calibration.csv	0.001210418	0.00013502	0.063	0.826161175	0.092157041	3.691523522	-1.200659451	0.590635554	4.259810062	0.915004148	-1.57938512	0.118287535	-1.69822494	0.118317798	-3.913119714	1.064110267	-2.089629885	0.153069494	34.85605208	4.123036484
1631	4498.993145	125	6281	2628.306421	11	0.385107536	831.1434678	ASGLLPRIIITPPYEL	Kd	826.1611753	92.15704066	8.96471034	0.000107628	ASGLLPRIIITPPYEL	38	full	34234.14086	full_calibration.csv	0.001210418	0.00013502	0.125	0.826161175	0.092157041	3.798028793	-0.903089987	0.590635554	4.259810062	0.915004148	-1.57938512	0.118287535	-1.69822494	0.118317798	-3.913119714	1.064110267	-2.089629885	0.153069494	34.85605208	4.123036484
1632	7952.837745	250	8998.25	3618.872418	60	0.407255887	471.1370591	ASGLLPRIIITPPYEL	Kd	826.1611753	92.15704066	8.96471034	0.000107628	ASGLLPRIIITPPYEL	38	full	34234.14086	full_calibration.csv	0.001210418	0.00013502	0.25	0.826161175	0.092157041	3.954158055	-0.602059991	0.590635554	4.259810062	0.915004148	-1.57938512	0.118287535	-1.69822494	0.118317798	-3.913119714	1.064110267	-2.089629885	0.153069494	34.85605208	4.123036484
1633	12907.23235	500	12498.25	4718.540987	22	0.390199527	1029.670059	ASGLLPRIIITPPYEL	Kd	826.1611753	92.15704066	8.96471034	0.000107628	ASGLLPRIIITPPYEL	38	full	34234.14086	full_calibration.csv	0.001210418	0.00013502	0.5	0.826161175	0.092157041	4.096849208	-0.301029996	0.590635554	4.259810062	0.915004148	-1.57938512	0.118287535	-1.69822494	0.118317798	-3.913119714	1.064110267	-2.089629885	0.153069494	34.85605208	4.123036484
1634	18746.50569	1000	16124.5	5214.996313	24	0.309318642	1087.401901	ASGLLPRIIITPPYEL	Kd	826.1611753	92.15704066	8.96471034	0.000107628	ASGLLPRIIITPPYEL	38	full	34234.14086	full_calibration.csv	0.001210418	0.00013502	1	0.826161175	0.092157041	4.207486257	0	0.590635554	4.259810062	0.915004148	-1.57938512	0.118287535	-1.69822494	0.118317798	-3.913119714	1.064110267	-2.089629885	0.153069494	34.85605208	4.123036484
1635	24226.60191	2000	25107	9759.172931	41	0.375504275	1543.060727	ASGLLPRIIITPPYEL	Kd	826.1611753	92.15704066	8.96471034	0.000107628	ASGLLPRIIITPPYEL	38	full	34234.14086	full_calibration.csv	0.001210418	0.00013502	2	0.826161175	0.092157041	4.399794823	0.301029996	0.590635554	4.259810062	0.915004148	-1.57938512	0.118287535	-1.69822494	0.118317798	-3.913119714	1.064110267	-2.089629885	0.153069494	34.85605208	4.123036484
1636	1.805827906	32	133	23.19406915	8	-0.267945925	8.766534123	ASGLSPRIEITPSHEL	Kd	606610.8057	641944.3174	0.944958604	0.381161054	ASGLSPRIEITPSHEL	39	full	34234.14086	full_calibration.csv	1.65E-06	1.74E-06	0.032	606.6108057	641.9443174	2.123851641	-1.494850022	0.039395354	2.195343851	0.485877952	2.333734594	1.058978973	2.214894773	1.058982354	0	1.496587847	1.823489829	1.06342597	25593.13905	27102.59611
1637	3.555042024	63	143.5	26.16605874	17	-0.29863914	6.541514684	ASGLSPRIEITPSHEL	Kd	606610.8057	641944.3174	0.944958604	0.381161054	ASGLSPRIEITPSHEL	39	full	34234.14086	full_calibration.csv	1.65E-06	1.74E-06	0.063	606.6108057	641.9443174	2.156851901	-1.200659451	0.039395354	2.195343851	0.485877952	2.333734594	1.058978973	2.214894773	1.058982354	0	1.496587847	1.823489829	1.06342597	25593.13905	27102.59611
1638	7.052934023	125	141.5	30.3361822	9	-0.351610611	10.72546008	ASGLSPRIEITPSHEL	Kd	606610.8057	641944.3174	0.944958604	0.381161054	ASGLSPRIEITPSHEL	39	full	34234.14086	full_calibration.csv	1.65E-06	1.74E-06	0.125	606.6108057	641.9443174	2.15075644	-0.903089987	0.039395354	2.195343851	0.485877952	2.333734594	1.058978973	2.214894773	1.058982354	0	1.496587847	1.823489829	1.06342597	25593.13905	27102.59611
1639	14.10296255	250	160.5	19.71533251	16	-0.290331634	5.090476965	ASGLSPRIEITPSHEL	Kd	606610.8057	641944.3174	0.944958604	0.381161054	ASGLSPRIEITPSHEL	39	full	34234.14086	full_calibration.csv	1.65E-06	1.74E-06	0.25	606.6108057	641.9443174	2.205475037	-0.602059991	0.039395354	2.195343851	0.485877952	2.333734594	1.058978973	2.214894773	1.058982354	0	1.496587847	1.823489829	1.06342597	25593.13905	27102.59611
1640	28.19431028	500	148	45.54611826	15	-0.587944728	12.17271213	ASGLSPRIEITPSHEL	Kd	606610.8057	641944.3174	0.944958604	0.381161054	ASGLSPRIEITPSHEL	39	full	34234.14086	full_calibration.csv	1.65E-06	1.74E-06	0.5	606.6108057	641.9443174	2.170261715	-0.301029996	0.039395354	2.195343851	0.485877952	2.333734594	1.058978973	2.214894773	1.058982354	0	1.496587847	1.823489829	1.06342597	25593.13905	27102.59611
1641	56.34221863	1000	154	64.61392015	22	-0.927876138	14.09991334	ASGLSPRIEITPSHEL	Kd	606610.8057	641944.3174	0.944958604	0.381161054	ASGLSPRIEITPSHEL	39	full	34234.14086	full_calibration.csv	1.65E-06	1.74E-06	1	606.6108057	641.9443174	2.187520721	0	0.039395354	2.195343851	0.485877952	2.333734594	1.058978973	2.214894773	1.058982354	0	1.496587847	1.823489829	1.06342597	25593.13905	27102.59611
1642	109.0156976	32	211.5	45.48829857	41	-2.767092346	7.192331518	ASGLSPRILITPSHEL	Kd	10016.94278	233.7008205	42.86224909	1.08E-08	ASGLSPRILITPSHEL	40	full	34234.14086	full_calibration.csv	9.98E-05	2.33E-06	0.032	10.01694278	0.233700821	2.325310372	-1.494850022	0.784068677	3.477875077	0.983185687	-0.099705823	0.045751367	-0.218545643	0.045829554	-2.433440416	1.058504562	-0.609950587	0.107384899	422.6185999	19.33537886
1643	213.9645949	63	365	67.93856702	15	0.428544367	18.1573458	ASGLSPRILITPSHEL	Kd	10016.94278	233.7008205	42.86224909	1.08E-08	ASGLSPRILITPSHEL	40	full	34234.14086	full_calibration.csv	9.98E-05	2.33E-06	0.063	10.01694278	0.233700821	2.562292864	-1.200659451	0.784068677	3.477875077	0.983185687	-0.099705823	0.045751367	-0.218545643	0.045829554	-2.433440416	1.058504562	-0.609950587	0.107384899	422.6185999	19.33537886
1644	421.9376602	125	641.25	601.1225827	16	1.097189291	155.2091834	ASGLSPRILITPSHEL	Kd	10016.94278	233.7008205	42.86224909	1.08E-08	ASGLSPRILITPSHEL	40	full	34234.14086	full_calibration.csv	9.98E-05	2.33E-06	0.125	10.01694278	0.233700821	2.807027378	-0.903089987	0.784068677	3.477875077	0.983185687	-0.099705823	0.045751367	-0.218545643	0.045829554	-2.433440416	1.058504562	-0.609950587	0.107384899	422.6185999	19.33537886
1645	833.6011407	250	748	510.4044787	17	1.027092346	127.6011197	ASGLSPRILITPSHEL	Kd	10016.94278	233.7008205	42.86224909	1.08E-08	ASGLSPRILITPSHEL	40	full	34234.14086	full_calibration.csv	9.98E-05	2.33E-06	0.25	10.01694278	0.233700821	2.873901598	-0.602059991	0.784068677	3.477875077	0.983185687	-0.099705823	0.045751367	-0.218545643	0.045829554	-2.433440416	1.058504562	-0.609950587	0.107384899	422.6185999	19.33537886
1646	1627.570938	500	1694	1126.373928	19	0.663312194	265.4888809	ASGLSPRILITPSHEL	Kd	10016.94278	233.7008205	42.86224909	1.08E-08	ASGLSPRILITPSHEL	40	full	34234.14086	full_calibration.csv	9.98E-05	2.33E-06	0.5	10.01694278	0.233700821	3.228913406	-0.301029996	0.784068677	3.477875077	0.983185687	-0.099705823	0.045751367	-0.218545643	0.045829554	-2.433440416	1.058504562	-0.609950587	0.107384899	422.6185999	19.33537886
1647	3107.408429	1000	3202	1632.853558	28	0.530193368	314.2428137	ASGLSPRILITPSHEL	Kd	10016.94278	233.7008205	42.86224909	1.08E-08	ASGLSPRILITPSHEL	40	full	34234.14086	full_calibration.csv	9.98E-05	2.33E-06	1	10.01694278	0.233700821	3.505421328	0	0.784068677	3.477875077	0.983185687	-0.099705823	0.045751367	-0.218545643	0.045829554	-2.433440416	1.058504562	-0.609950587	0.107384899	422.6185999	19.33537886
1648	5697.645646	2000	5606	4256.33337	33	0.642102694	752.4205473	ASGLSPRILITPSHEL	Kd	10016.94278	233.7008205	42.86224909	1.08E-08	ASGLSPRILITPSHEL	40	full	34234.14086	full_calibration.csv	9.98E-05	2.33E-06	2	10.01694278	0.233700821	3.748653093	0.301029996	0.784068677	3.477875077	0.983185687	-0.099705823	0.045751367	-0.218545643	0.045829554	-2.433440416	1.058504562	-0.609950587	0.107384899	422.6185999	19.33537886
1649	28.20514517	32	207	73.82674914	9	-6.921257732	26.10169748	ASGLSPRIAITPSHEL	Kd	38808.16554	3822.344661	10.15297389	5.31E-05	ASGLSPRIAITPSHEL	41	full	34234.14086	full_calibration.csv	2.58E-05	2.54E-06	0.032	38.80816554	3.822344661	2.315970345	-1.494850022	0.490253809	2.967599432	0.942605061	0.703425351	0.106065098	0.584585531	0.106098847	-1.630309242	1.062821022	0.193180587	0.143833702	1637.331164	173.6636897
1650	55.48459491	63	238.5	30.52451627	16	5.251529682	7.881396212	ASGLSPRIAITPSHEL	Kd	38808.16554	3822.344661	10.15297389	5.31E-05	ASGLSPRIAITPSHEL	41	full	34234.14086	full_calibration.csv	2.58E-05	2.54E-06	0.063	38.80816554	3.822344661	2.377488383	-1.200659451	0.490253809	2.967599432	0.942605061	0.703425351	0.106065098	0.584585531	0.106098847	-1.630309242	1.062821022	0.193180587	0.143833702	1637.331164	173.6636897
1651	109.9131691	125	325.5	61.18038294	22	0.550048396	13.35065409	ASGLSPRIAITPSHEL	Kd	38808.16554	3822.344661	10.15297389	5.31E-05	ASGLSPRIAITPSHEL	41	full	34234.14086	full_calibration.csv	2.58E-05	2.54E-06	0.125	38.80816554	3.822344661	2.512550993	-0.903089987	0.490253809	2.967599432	0.942605061	0.703425351	0.106065098	0.584585531	0.106098847	-1.630309242	1.062821022	0.193180587	0.143833702	1637.331164	173.6636897
1652	219.1228158	250	346.5	164.9163103	29	1.069328787	31.16625316	ASGLSPRIAITPSHEL	Kd	38808.16554	3822.344661	10.15297389	5.31E-05	ASGLSPRIAITPSHEL	41	full	34234.14086	full_calibration.csv	2.58E-05	2.54E-06	0.25	38.80816554	3.822344661	2.539703239	-0.602059991	0.490253809	2.967599432	0.942605061	0.703425351	0.106065098	0.584585531	0.106098847	-1.630309242	1.062821022	0.193180587	0.143833702	1637.331164	173.6636897
1653	435.4583887	500	618.5	274.2847889	24	0.724463207	57.19233203	ASGLSPRIAITPSHEL	Kd	38808.16554	3822.344661	10.15297389	5.31E-05	ASGLSPRIAITPSHEL	41	full	34234.14086	full_calibration.csv	2.58E-05	2.54E-06	0.5	38.80816554	3.822344661	2.791339704	-0.301029996	0.490253809	2.967599432	0.942605061	0.703425351	0.106065098	0.584585531	0.106098847	-1.630309242	1.062821022	0.193180587	0.143833702	1637.331164	173.6636897
1654	859.9778561	1000	989	339.3028801	9	0.417603545	119.9616837	ASGLSPRIAITPSHEL	Kd	38808.16554	3822.344661	10.15297389	5.31E-05	ASGLSPRIAITPSHEL	41	full	34234.14086	full_calibration.csv	2.58E-05	2.54E-06	1	38.80816554	3.822344661	2.995196292	0	0.490253809	2.967599432	0.942605061	0.703425351	0.106065098	0.584585531	0.106098847	-1.630309242	1.062821022	0.193180587	0.143833702	1637.331164	173.6636897
1655	1677.80837	2000	1519	523.89349	21	0.378216934	117.1461457	ASGLSPRIAITPSHEL	Kd	38808.16554	3822.344661	10.15297389	5.31E-05	ASGLSPRIAITPSHEL	41	full	34234.14086	full_calibration.csv	2.58E-05	2.54E-06	2	38.80816554	3.822344661	3.181557774	0.301029996	0.490253809	2.967599432	0.942605061	0.703425351	0.106065098	0.584585531	0.106098847	-1.630309242	1.062821022	0.193180587	0.143833702	1637.331164	173.6636897
1656	7.288298851	32	192.75	37.64518562	20	-0.995904381	8.636397885	ASGLSPRIEISPSHEL	Kd	150276.3957	51804.39128	2.900842804	0.027304442	ASGLSPRIEISPSHEL	42	full	34234.14086	full_calibration.csv	6.65E-06	2.29E-06	0.032	150.2763957	51.80439128	2.284994387	-1.494850022	0.131731122	2.470534307	0.849342234	1.506255769	0.346966646	1.387415948	0.346976965	-0.827478825	1.112980042	0.996011004	0.36031123	6340.217903	2199.844143
1657	14.34587963	63	194	33.84404676	21	-1.177671884	7.567758919	ASGLSPRIEISPSHEL	Kd	150276.3957	51804.39128	2.900842804	0.027304442	ASGLSPRIEISPSHEL	42	full	34234.14086	full_calibration.csv	6.65E-06	2.29E-06	0.063	150.2763957	51.80439128	2.28780173	-1.200659451	0.131731122	2.470534307	0.849342234	1.506255769	0.346966646	1.387415948	0.346976965	-0.827478825	1.112980042	0.996011004	0.36031123	6340.217903	2199.844143
1658	28.45231315	125	250.75	30.09937707	10	1.547525813	10.03312569	ASGLSPRIEISPSHEL	Kd	150276.3957	51804.39128	2.900842804	0.027304442	ASGLSPRIEISPSHEL	42	full	34234.14086	full_calibration.csv	6.65E-06	2.29E-06	0.125	150.2763957	51.80439128	2.399240942	-0.903089987	0.131731122	2.470534307	0.849342234	1.506255769	0.346966646	1.387415948	0.346976965	-0.827478825	1.112980042	0.996011004	0.36031123	6340.217903	2199.844143
1659	56.8573716	250	226	152.3854496	17	4.086045179	38.09636241	ASGLSPRIEISPSHEL	Kd	150276.3957	51804.39128	2.900842804	0.027304442	ASGLSPRIEISPSHEL	42	full	34234.14086	full_calibration.csv	6.65E-06	2.29E-06	0.25	150.2763957	51.80439128	2.354108439	-0.602059991	0.131731122	2.470534307	0.849342234	1.506255769	0.346966646	1.387415948	0.346976965	-0.827478825	1.112980042	0.996011004	0.36031123	6340.217903	2199.844143
1660	113.5261946	500	252.5	38.2058235	14	0.989605049	10.59638889	ASGLSPRIEISPSHEL	Kd	150276.3957	51804.39128	2.900842804	0.027304442	ASGLSPRIEISPSHEL	42	full	34234.14086	full_calibration.csv	6.65E-06	2.29E-06	0.5	150.2763957	51.80439128	2.402261382	-0.301029996	0.131731122	2.470534307	0.849342234	1.506255769	0.346966646	1.387415948	0.346976965	-0.827478825	1.112980042	0.996011004	0.36031123	6340.217903	2199.844143
1661	226.3019337	1000	318.5	71.60360057	23	0.749605286	15.26593893	ASGLSPRIEISPSHEL	Kd	150276.3957	51804.39128	2.900842804	0.027304442	ASGLSPRIEISPSHEL	42	full	34234.14086	full_calibration.csv	6.65E-06	2.29E-06	1	150.2763957	51.80439128	2.503109437	0	0.131731122	2.470534307	0.849342234	1.506255769	0.346966646	1.387415948	0.346976965	-0.827478825	1.112980042	0.996011004	0.36031123	6340.217903	2199.844143
1662	449.6316151	2000	322.75	175.6537283	26	1.204694522	35.13074565	ASGLSPRIEISPSHEL	Kd	150276.3957	51804.39128	2.900842804	0.027304442	ASGLSPRIEISPSHEL	42	full	34234.14086	full_calibration.csv	6.65E-06	2.29E-06	2	150.2763957	51.80439128	2.508866251	0.301029996	0.131731122	2.470534307	0.849342234	1.506255769	0.346966646	1.387415948	0.346976965	-0.827478825	1.112980042	0.996011004	0.36031123	6340.217903	2199.844143
1663	12.15556493	32	158	15.80912937	7	-0.218056957	6.454050039	ASGLSPRIEIFPSHEL	Kd	90090.71447	16659.62602	5.407727303	0.001651794	ASGLSPRIEIFPSHEL	43	full	34234.14086	full_calibration.csv	1.11E-05	2.05E-06	0.032	90.09071447	16.65962602	2.198657087	-1.494850022	0.38064764	2.650627934	0.851407273	1.202841901	0.18906213	1.084002081	0.189081066	-1.130892692	1.074282648	0.692597137	0.212562504	3800.961276	718.6178356
1664	23.92303952	63	150.25	51.99919871	18	-0.873936113	12.61165816	ASGLSPRIEIFPSHEL	Kd	90090.71447	16659.62602	5.407727303	0.001651794	ASGLSPRIEIFPSHEL	43	full	34234.14086	full_calibration.csv	1.11E-05	2.05E-06	0.063	90.09071447	16.65962602	2.176814481	-1.200659451	0.38064764	2.650627934	0.851407273	1.202841901	0.18906213	1.084002081	0.189081066	-1.130892692	1.074282648	0.692597137	0.212562504	3800.961276	718.6178356
1665	47.4337274	125	156.25	29.25	2	-0.419354839	29.25	ASGLSPRIEIFPSHEL	Kd	90090.71447	16659.62602	5.407727303	0.001651794	ASGLSPRIEIFPSHEL	43	full	34234.14086	full_calibration.csv	1.11E-05	2.05E-06	0.125	90.09071447	16.65962602	2.193820026	-0.903089987	0.38064764	2.650627934	0.851407273	1.202841901	0.18906213	1.084002081	0.189081066	-1.130892692	1.074282648	0.692597137	0.212562504	3800.961276	718.6178356
1666	94.73619137	250	198	54.72901704	7	-11.2677388	22.34302765	ASGLSPRIEIFPSHEL	Kd	90090.71447	16659.62602	5.407727303	0.001651794	ASGLSPRIEIFPSHEL	43	full	34234.14086	full_calibration.csv	1.11E-05	2.05E-06	0.25	90.09071447	16.65962602	2.29666519	-0.602059991	0.38064764	2.650627934	0.851407273	1.202841901	0.18906213	1.084002081	0.189081066	-1.130892692	1.074282648	0.692597137	0.212562504	3800.961276	718.6178356
1667	188.9495025	500	419.5	30.62678566	3	0.173522865	21.65640783	ASGLSPRIEIFPSHEL	Kd	90090.71447	16659.62602	5.407727303	0.001651794	ASGLSPRIEIFPSHEL	43	full	34234.14086	full_calibration.csv	1.11E-05	2.05E-06	0.5	90.09071447	16.65962602	2.622731965	-0.301029996	0.38064764	2.650627934	0.851407273	1.202841901	0.18906213	1.084002081	0.189081066	-1.130892692	1.074282648	0.692597137	0.212562504	3800.961276	718.6178356
1668	375.8247046	1000	489	66.54850924	7	0.255745026	27.16831513	ASGLSPRIEIFPSHEL	Kd	90090.71447	16659.62602	5.407727303	0.001651794	ASGLSPRIEIFPSHEL	43	full	34234.14086	full_calibration.csv	1.11E-05	2.05E-06	1	90.09071447	16.65962602	2.689308859	0	0.38064764	2.650627934	0.851407273	1.202841901	0.18906213	1.084002081	0.189081066	-1.130892692	1.074282648	0.692597137	0.212562504	3800.961276	718.6178356
1669	743.4873549	2000	599	139.0335446	37	0.336180966	23.17225743	ASGLSPRIEIFPSHEL	Kd	90090.71447	16659.62602	5.407727303	0.001651794	ASGLSPRIEIFPSHEL	43	full	34234.14086	full_calibration.csv	1.11E-05	2.05E-06	2	90.09071447	16.65962602	2.777426822	0.301029996	0.38064764	2.650627934	0.851407273	1.202841901	0.18906213	1.084002081	0.189081066	-1.130892692	1.074282648	0.692597137	0.212562504	3800.961276	718.6178356
1670	41.87403904	32	160.5	24.92832701	11	-0.481072977	7.883029161	ASGLLPRIEITPSHEL	Kd	26129.61547	2776.872192	9.409729243	8.19E-05	ASGLLPRIEITPSHEL	44	full	34234.14086	full_calibration.csv	3.83E-05	4.07E-06	0.032	26.12961547	2.776872192	2.205475037	-1.494850022	0.626031338	3.147282189	0.946474906	0.468857493	0.113326166	0.350017672	0.113357753	-1.864877101	1.063570186	-0.041387272	0.149268714	1102.418347	124.9328446
1671	82.34194393	63	325.5	53.94311819	5	0.52781916	26.97155909	ASGLLPRIEITPSHEL	Kd	26129.61547	2776.872192	9.409729243	8.19E-05	ASGLLPRIEITPSHEL	44	full	34234.14086	full_calibration.csv	3.83E-05	4.07E-06	0.063	26.12961547	2.776872192	2.512550993	-1.200659451	0.626031338	3.147282189	0.946474906	0.468857493	0.113326166	0.350017672	0.113357753	-1.864877101	1.063570186	-0.041387272	0.149268714	1102.418347	124.9328446
1672	162.9910601	125	316.5	57.23261888	17	0.530076013	14.30815472	ASGLLPRIEITPSHEL	Kd	26129.61547	2776.872192	9.409729243	8.19E-05	ASGLLPRIEITPSHEL	44	full	34234.14086	full_calibration.csv	3.83E-05	4.07E-06	0.125	26.12961547	2.776872192	2.500373714	-0.903089987	0.626031338	3.147282189	0.946474906	0.468857493	0.113326166	0.350017672	0.113357753	-1.864877101	1.063570186	-0.041387272	0.149268714	1102.418347	124.9328446
1673	324.4374515	250	431	111.7773569	13	0.501849642	32.26734355	ASGLLPRIEITPSHEL	Kd	26129.61547	2776.872192	9.409729243	8.19E-05	ASGLLPRIEITPSHEL	44	full	34234.14086	full_calibration.csv	3.83E-05	4.07E-06	0.25	26.12961547	2.776872192	2.63447727	-0.602059991	0.626031338	3.147282189	0.946474906	0.468857493	0.113326166	0.350017672	0.113357753	-1.864877101	1.063570186	-0.041387272	0.149268714	1102.418347	124.9328446
1674	642.783237	500	1067	379.8684654	7	0.575682888	155.0806516	ASGLLPRIEITPSHEL	Kd	26129.61547	2776.872192	9.409729243	8.19E-05	ASGLLPRIEITPSHEL	44	full	34234.14086	full_calibration.csv	3.83E-05	4.07E-06	0.5	26.12961547	2.776872192	3.028164419	-0.301029996	0.626031338	3.147282189	0.946474906	0.468857493	0.113326166	0.350017672	0.113357753	-1.864877101	1.063570186	-0.041387272	0.149268714	1102.418347	124.9328446
1675	1261.873428	1000	1566.5	471.3693244	10	0.340978967	157.1231081	ASGLLPRIEITPSHEL	Kd	26129.61547	2776.872192	9.409729243	8.19E-05	ASGLLPRIEITPSHEL	44	full	34234.14086	full_calibration.csv	3.83E-05	4.07E-06	1	26.12961547	2.776872192	3.194930399	0	0.626031338	3.147282189	0.946474906	0.468857493	0.113326166	0.350017672	0.113357753	-1.864877101	1.063570186	-0.041387272	0.149268714	1102.418347	124.9328446
1676	2434.028357	2000	2114.75	967.8410862	24	0.433103111	201.808817	ASGLLPRIEITPSHEL	Kd	26129.61547	2776.872192	9.409729243	8.19E-05	ASGLLPRIEITPSHEL	44	full	34234.14086	full_calibration.csv	3.83E-05	4.07E-06	2	26.12961547	2.776872192	3.325259034	0.301029996	0.626031338	3.147282189	0.946474906	0.468857493	0.113326166	0.350017672	0.113357753	-1.864877101	1.063570186	-0.041387272	0.149268714	1102.418347	124.9328446
1677	17.42292045	32	176.5	39.86907586	9	-0.799157423	14.09584695	ASGLSPRIEITPFHEL	Kd	62844.51434	6593.814861	9.530827853	7.61E-05	ASGLSPRIEITPFHEL	45	full	34234.14086	full_calibration.csv	1.59E-05	1.67E-06	0.032	62.84451434	6.593814861	2.24674471	-1.494850022	0.423897147	2.752356883	0.874310199	0.989270904	0.112060884	0.870431084	0.112092828	-1.344463689	1.063436111	0.47902614	0.148310386	2651.4338	297.1220146
1678	34.28447137	63	176	14.11594843	5	-0.292862001	7.057974214	ASGLSPRIEITPFHEL	Kd	62844.51434	6593.814861	9.530827853	7.61E-05	ASGLSPRIEITPFHEL	45	full	34234.14086	full_calibration.csv	1.59E-05	1.67E-06	0.063	62.84451434	6.593814861	2.245512668	-1.200659451	0.423897147	2.752356883	0.874310199	0.989270904	0.112060884	0.870431084	0.112092828	-1.344463689	1.063436111	0.47902614	0.148310386	2651.4338	297.1220146
1679	67.95776738	125	190	67.76174674	9	-1.344775569	23.95739531	ASGLSPRIEITPFHEL	Kd	62844.51434	6593.814861	9.530827853	7.61E-05	ASGLSPRIEITPFHEL	45	full	34234.14086	full_calibration.csv	1.59E-05	1.67E-06	0.125	62.84451434	6.593814861	2.278753601	-0.903089987	0.423897147	2.752356883	0.874310199	0.989270904	0.112060884	0.870431084	0.112092828	-1.344463689	1.063436111	0.47902614	0.148310386	2651.4338	297.1220146
1680	135.646265	250	238	35.96135437	11	3.15199122	11.37197876	ASGLSPRIEITPFHEL	Kd	62844.51434	6593.814861	9.530827853	7.61E-05	ASGLSPRIEITPFHEL	45	full	34234.14086	full_calibration.csv	1.59E-05	1.67E-06	0.25	62.84451434	6.593814861	2.376576957	-0.602059991	0.423897147	2.752356883	0.874310199	0.989270904	0.112060884	0.870431084	0.112092828	-1.344463689	1.063436111	0.47902614	0.148310386	2651.4338	297.1220146
1681	270.2218275	500	406	42.01463039	6	0.239059063	18.78951392	ASGLSPRIEITPFHEL	Kd	62844.51434	6593.814861	9.530827853	7.61E-05	ASGLSPRIEITPFHEL	45	full	34234.14086	full_calibration.csv	1.59E-05	1.67E-06	0.5	62.84451434	6.593814861	2.608526034	-0.301029996	0.423897147	2.752356883	0.874310199	0.989270904	0.112060884	0.870431084	0.112092828	-1.344463689	1.063436111	0.47902614	0.148310386	2651.4338	297.1220146
1682	536.2111563	1000	543.5	153.7518912	19	0.477529372	36.23966829	ASGLSPRIEITPFHEL	Kd	62844.51434	6593.814861	9.530827853	7.61E-05	ASGLSPRIEITPFHEL	45	full	34234.14086	full_calibration.csv	1.59E-05	1.67E-06	1	62.84451434	6.593814861	2.735199548	0	0.423897147	2.752356883	0.874310199	0.989270904	0.112060884	0.870431084	0.112092828	-1.344463689	1.063436111	0.47902614	0.148310386	2651.4338	297.1220146
1683	1055.883947	2000	987.5	569.1236057	14	0.641627515	157.8464879	ASGLSPRIEITPFHEL	Kd	62844.51434	6593.814861	9.530827853	7.61E-05	ASGLSPRIEITPFHEL	45	full	34234.14086	full_calibration.csv	1.59E-05	1.67E-06	2	62.84451434	6.593814861	2.994537104	0.301029996	0.423897147	2.752356883	0.874310199	0.989270904	0.112060884	0.870431084	0.112092828	-1.344463689	1.063436111	0.47902614	0.148310386	2651.4338	297.1220146
1684	11.41359099	32	165.75	38.97138908	30	-0.582967675	7.236805274	ASGLSPRIEITASHEL	Kd	95949.4057	17875.07753	5.367775639	0.001715412	ASGLSPRIEITASHEL	46	full	34234.14086	full_calibration.csv	1.04E-05	1.94E-06	0.032	95.9494057	17.87507753	2.219453537	-1.494850022	0.272398773	2.600842826	0.830577312	1.24020323	0.190408536	1.12136341	0.190427338	-1.093531363	1.074520419	0.729958466	0.21376094	4048.141672	770.8007288
1685	22.4632521	63	208.5	55.01626978	13	-2.173895159	15.88182908	ASGLSPRIEITASHEL	Kd	95949.4057	17875.07753	5.367775639	0.001715412	ASGLSPRIEITASHEL	46	full	34234.14086	full_calibration.csv	1.04E-05	1.94E-06	0.063	95.9494057	17.87507753	2.319106059	-1.200659451	0.272398773	2.600842826	0.830577312	1.24020323	0.190408536	1.12136341	0.190427338	-1.093531363	1.074520419	0.729958466	0.21376094	4048.141672	770.8007288
1686	44.54118218	125	219	34.50380264	11	-9.036710216	10.91106043	ASGLSPRIEITASHEL	Kd	95949.4057	17875.07753	5.367775639	0.001715412	ASGLSPRIEITASHEL	46	full	34234.14086	full_calibration.csv	1.04E-05	1.94E-06	0.125	95.9494057	17.87507753	2.340444115	-0.903089987	0.272398773	2.600842826	0.830577312	1.24020323	0.190408536	1.12136341	0.190427338	-1.093531363	1.074520419	0.729958466	0.21376094	4048.141672	770.8007288
1687	88.96661213	250	244.5	50.40932453	20	1.575291392	11.56469218	ASGLSPRIEITASHEL	Kd	95949.4057	17875.07753	5.367775639	0.001715412	ASGLSPRIEITASHEL	46	full	34234.14086	full_calibration.csv	1.04E-05	1.94E-06	0.25	95.9494057	17.87507753	2.388278863	-0.602059991	0.272398773	2.600842826	0.830577312	1.24020323	0.190408536	1.12136341	0.190427338	-1.093531363	1.074520419	0.729958466	0.21376094	4048.141672	770.8007288
1688	177.4720156	500	298.5	70.49562494	13	1.205846216	20.35033402	ASGLSPRIEITASHEL	Kd	95949.4057	17875.07753	5.367775639	0.001715412	ASGLSPRIEITASHEL	46	full	34234.14086	full_calibration.csv	1.04E-05	1.94E-06	0.5	95.9494057	17.87507753	2.474944335	-0.301029996	0.272398773	2.600842826	0.830577312	1.24020323	0.190408536	1.12136341	0.190427338	-1.093531363	1.074520419	0.729958466	0.21376094	4048.141672	770.8007288
1689	353.1134679	1000	325	151.2034556	20	1.56201917	34.68845174	ASGLSPRIEITASHEL	Kd	95949.4057	17875.07753	5.367775639	0.001715412	ASGLSPRIEITASHEL	46	full	34234.14086	full_calibration.csv	1.04E-05	1.94E-06	1	95.9494057	17.87507753	2.511883361	0	0.272398773	2.600842826	0.830577312	1.24020323	0.190408536	1.12136341	0.190427338	-1.093531363	1.074520419	0.729958466	0.21376094	4048.141672	770.8007288
1690	699.0168161	2000	642	1352.416496	21	1.899143831	302.4095219	ASGLSPRIEITASHEL	Kd	95949.4057	17875.07753	5.367775639	0.001715412	ASGLSPRIEITASHEL	46	full	34234.14086	full_calibration.csv	1.04E-05	1.94E-06	2	95.9494057	17.87507753	2.807535028	0.301029996	0.272398773	2.600842826	0.830577312	1.24020323	0.190408536	1.12136341	0.190427338	-1.093531363	1.074520419	0.729958466	0.21376094	4048.141672	770.8007288
1691	164.9624375	32	319.25	58.5668079	18	0.623788487	14.20453736	ASGLLPRIEITPPPEL	Kd	6608.86033	717.5098825	9.210828298	9.24E-05	ASGLLPRIEITPPPEL	48	full	34234.14086	full_calibration.csv	0.000151312	1.64E-05	0.032	6.60886033	0.717509883	2.504130906	-1.494850022	0.733148973	3.69626567	0.967978389	-0.346314784	0.115480973	-0.465154605	0.115511971	-2.680049378	1.063801943	-0.856559549	0.150911179	278.8303139	32.19959588
1692	323.2607949	63	747	353.8858593	12	0.600739894	106.7006013	ASGLLPRIEITPPPEL	Kd	6608.86033	717.5098825	9.210828298	9.24E-05	ASGLLPRIEITPPPEL	48	full	34234.14086	full_calibration.csv	0.000151312	1.64E-05	0.063	6.60886033	0.717509883	2.873320602	-1.200659451	0.733148973	3.69626567	0.967978389	-0.346314784	0.115480973	-0.465154605	0.115511971	-2.680049378	1.063801943	-0.856559549	0.150911179	278.8303139	32.19959588
1693	635.4850557	125	1266.75	779.6677986	26	0.671759905	155.9335597	ASGLLPRIEITPPPEL	Kd	6608.86033	717.5098825	9.210828298	9.24E-05	ASGLLPRIEITPPPEL	48	full	34234.14086	full_calibration.csv	0.000151312	1.64E-05	0.125	6.60886033	0.717509883	3.102690913	-0.903089987	0.733148973	3.69626567	0.967978389	-0.346314784	0.115480973	-0.465154605	0.115511971	-2.680049378	1.063801943	-0.856559549	0.150911179	278.8303139	32.19959588
1694	1247.807187	250	1550.25	620.1089776	24	0.448879972	129.3016601	ASGLLPRIEITPPPEL	Kd	6608.86033	717.5098825	9.210828298	9.24E-05	ASGLLPRIEITPPPEL	48	full	34234.14086	full_calibration.csv	0.000151312	1.64E-05	0.25	6.60886033	0.717509883	3.19040174	-0.602059991	0.733148973	3.69626567	0.967978389	-0.346314784	0.115480973	-0.465154605	0.115511971	-2.680049378	1.063801943	-0.856559549	0.150911179	278.8303139	32.19959588
1695	2407.850152	500	3674	1193.104883	15	0.322524703	318.8706928	ASGLLPRIEITPPPEL	Kd	6608.86033	717.5098825	9.210828298	9.24E-05	ASGLLPRIEITPPPEL	48	full	34234.14086	full_calibration.csv	0.000151312	1.64E-05	0.5	6.60886033	0.717509883	3.565139152	-0.301029996	0.733148973	3.69626567	0.967978389	-0.346314784	0.115480973	-0.465154605	0.115511971	-2.680049378	1.063801943	-0.856559549	0.150911179	278.8303139	32.19959588
1696	4499.246848	1000	5300.5	2692.578007	13	0.481982734	777.2803187	ASGLLPRIEITPPPEL	Kd	6608.86033	717.5098825	9.210828298	9.24E-05	ASGLLPRIEITPPPEL	48	full	34234.14086	full_calibration.csv	0.000151312	1.64E-05	1	6.60886033	0.717509883	3.724316839	0	0.733148973	3.69626567	0.967978389	-0.346314784	0.115480973	-0.465154605	0.115511971	-2.680049378	1.063801943	-0.856559549	0.150911179	278.8303139	32.19959588
1697	7953.23412	2000	6825.75	2384.930986	28	0.341133454	458.9801823	ASGLLPRIEITPPPEL	Kd	6608.86033	717.5098825	9.210828298	9.24E-05	ASGLLPRIEITPPPEL	48	full	34234.14086	full_calibration.csv	0.000151312	1.64E-05	2	6.60886033	0.717509883	3.834150378	0.301029996	0.733148973	3.69626567	0.967978389	-0.346314784	0.115480973	-0.465154605	0.115511971	-2.680049378	1.063801943	-0.856559549	0.150911179	278.8303139	32.19959588
