# Supplementary material for: Quantitative mapping of protein-peptide affinity landscapes using spectrally encoded beads
Source: eLife journal article supplement (doi:10.7554/elife.40499), 2019-07-08
Supplement: supp [file elife-40499-supp-v1.zip › elife_poa_e40499_Figure_5_source_data_4.csv]

	.fitted	Conc	MED	SD	N	CV	SEM	full_sequence	term	kd_nM	kd_error	statistic	p.value	seq	seq_index	CVidx	Rmax	file	ka	ka_error	Conc_uM	kd_uM	kd_error_uM	MED_L10	Conc_L10	lm_x	lm_a	lm_r2	ddG_PVIVIT	ddGE_PVIVIT	ddG_PKIVIT	ddGE_PKIVIT	ddG_PRIEIT	ddGE_PRIEIT	ddG_IAIIIT	ddGE_IAIIIT	kd_true	kdE_true
1698	28.23445068	1000	50.25	69.03403526	90	-0.576030333	7.317593103	SCRAMBLED	Kd	346087.7799	462380.6712	0.748491019	0.482462428	SCRAMBLED	0	full	9799.832804	full_calibration2.csv	2.89E-06	3.86E-06	1	346.0877799	462.3806712	1.701136066	0	-0.475315352	1.50902423	0.62547537	3.023880596	1.343941403	2.444355602	1.341728313	1.727699062	1.346450619	3.32060787	1.338462642	81952.97123	110139.9912
1699	3.538226119	125	95	169.6363668	94	-1.561784376	17.59047181	SCRAMBLED	Kd	346087.7799	462380.6712	0.748491019	0.482462428	SCRAMBLED	0	full	9799.832804	full_calibration2.csv	2.89E-06	3.86E-06	0.125	346.0877799	462.3806712	1.977723605	-0.903089987	-0.475315352	1.50902423	0.62547537	3.023880596	1.343941403	2.444355602	1.341728313	1.727699062	1.346450619	3.32060787	1.338462642	81952.97123	110139.9912
1700	56.30667533	2000	10	108.3485074	57	-0.786133518	14.47867832	SCRAMBLED	Kd	346087.7799	462380.6712	0.748491019	0.482462428	SCRAMBLED	0	full	9799.832804	full_calibration2.csv	2.89E-06	3.86E-06	2	346.0877799	462.3806712	1	0.301029996	-0.475315352	1.50902423	0.62547537	3.023880596	1.343941403	2.444355602	1.341728313	1.727699062	1.346450619	3.32060787	1.338462642	81952.97123	110139.9912
1701	7.07389821	250	87.5	222.045459	79	-3.393285862	25.14169738	SCRAMBLED	Kd	346087.7799	462380.6712	0.748491019	0.482462428	SCRAMBLED	0	full	9799.832804	full_calibration2.csv	2.89E-06	3.86E-06	0.25	346.0877799	462.3806712	1.942008053	-0.602059991	-0.475315352	1.50902423	0.62547537	3.023880596	1.343941403	2.444355602	1.341728313	1.727699062	1.346450619	3.32060787	1.338462642	81952.97123	110139.9912
1702	0.906029265	32	116	180.3382687	85	-2.357544269	19.67651826	SCRAMBLED	Kd	346087.7799	462380.6712	0.748491019	0.482462428	SCRAMBLED	0	full	9799.832804	full_calibration2.csv	2.89E-06	3.86E-06	0.032	346.0877799	462.3806712	2.064457989	-1.494850022	-0.475315352	1.50902423	0.62547537	3.023880596	1.343941403	2.444355602	1.341728313	1.727699062	1.346450619	3.32060787	1.338462642	81952.97123	110139.9912
1703	14.13759136	500	70	423.2497889	99	-4.893061144	42.75468513	SCRAMBLED	Kd	346087.7799	462380.6712	0.748491019	0.482462428	SCRAMBLED	0	full	9799.832804	full_calibration2.csv	2.89E-06	3.86E-06	0.5	346.0877799	462.3806712	1.84509804	-0.301029996	-0.475315352	1.50902423	0.62547537	3.023880596	1.343941403	2.444355602	1.341728313	1.727699062	1.346450619	3.32060787	1.338462642	81952.97123	110139.9912
1704	1.78358537	63	107	65.04130804	83	-0.990173985	7.182610905	SCRAMBLED	Kd	346087.7799	462380.6712	0.748491019	0.482462428	SCRAMBLED	0	full	9799.832804	full_calibration2.csv	2.89E-06	3.86E-06	0.063	346.0877799	462.3806712	2.029383778	-1.200659451	-0.475315352	1.50902423	0.62547537	3.023880596	1.343941403	2.444355602	1.341728313	1.727699062	1.346450619	3.32060787	1.338462642	81952.97123	110139.9912
1705	27.09570014	1000	58	539.0742288	101	-2.609090335	53.90742288	SCRAMBLED	Kd	360674.8323	524842.3992	0.687205974	0.517619809	SCRAMBLED	1	full	9799.832804	full_calibration2.csv	2.77E-06	4.03E-06	1	360.6748323	524.8423992	1.763427994	0	-0.183681703	1.81415134	0.808383719	3.023880596	1.343941403	2.444355602	1.341728313	1.727699062	1.346450619	3.32060787	1.338462642	81952.97123	110139.9912
1706	3.395176468	125	91.75	1027.789932	84	-5.43427672	112.8146013	SCRAMBLED	Kd	360674.8323	524842.3992	0.687205974	0.517619809	SCRAMBLED	1	full	9799.832804	full_calibration2.csv	2.77E-06	4.03E-06	0.125	360.6748323	524.8423992	1.962606073	-0.903089987	-0.183681703	1.81415134	0.808383719	3.023880596	1.343941403	2.444355602	1.341728313	1.727699062	1.346450619	3.32060787	1.338462642	81952.97123	110139.9912
1707	6.788001217	250	100	244.4043048	81	-4.607645452	27.32523197	SCRAMBLED	Kd	360674.8323	524842.3992	0.687205974	0.517619809	SCRAMBLED	1	full	9799.832804	full_calibration2.csv	2.77E-06	4.03E-06	0.25	360.6748323	524.8423992	2	-0.602059991	-0.183681703	1.81415134	0.808383719	3.023880596	1.343941403	2.444355602	1.341728313	1.727699062	1.346450619	3.32060787	1.338462642	81952.97123	110139.9912
1708	0.86938927	32	115	130.929669	84	-1.585653431	14.37139823	SCRAMBLED	Kd	360674.8323	524842.3992	0.687205974	0.517619809	SCRAMBLED	1	full	9799.832804	full_calibration2.csv	2.77E-06	4.03E-06	0.032	360.6748323	524.8423992	2.06069784	-1.494850022	-0.183681703	1.81415134	0.808383719	3.023880596	1.343941403	2.444355602	1.341728313	1.727699062	1.346450619	3.32060787	1.338462642	81952.97123	110139.9912
1709	13.56660532	500	76.5	294.7298381	79	-2.172286907	33.37158269	SCRAMBLED	Kd	360674.8323	524842.3992	0.687205974	0.517619809	SCRAMBLED	1	full	9799.832804	full_calibration2.csv	2.77E-06	4.03E-06	0.5	360.6748323	524.8423992	1.883661435	-0.301029996	-0.183681703	1.81415134	0.808383719	3.023880596	1.343941403	2.444355602	1.341728313	1.727699062	1.346450619	3.32060787	1.338462642	81952.97123	110139.9912
1710	1.711463039	63	110	97.51813559	89	-1.807583894	10.39546818	SCRAMBLED	Kd	360674.8323	524842.3992	0.687205974	0.517619809	SCRAMBLED	1	full	9799.832804	full_calibration2.csv	2.77E-06	4.03E-06	0.063	360.6748323	524.8423992	2.041392685	-1.200659451	-0.183681703	1.81415134	0.808383719	3.023880596	1.343941403	2.444355602	1.341728313	1.727699062	1.346450619	3.32060787	1.338462642	81952.97123	110139.9912
1711	3149.550202	1000	3266	1013.56739	83	0.32331071	111.9297937	MAGPHPVIVITGPHEE	Kd	2111.502333	307.6233857	6.863920078	0.000470985	HPVIVITGPH	2	full	9799.832804	full_calibration2.csv	0.000473596	6.90E-05	1	2.111502333	0.307623386	3.51401618	0	0.633338568	3.515916333	0.945290443	0	0.206035843	-0.579524993	0.191068417	-1.296181534	0.221814208	0.296727274	0.166596871	500	103.0179217
1712	547.7209132	125	1084.75	446.2638796	86	0.46615119	48.40411386	MAGPHPVIVITGPHEE	Kd	2111.502333	307.6233857	6.863920078	0.000470985	HPVIVITGPH	2	full	9799.832804	full_calibration2.csv	0.000473596	6.90E-05	0.125	2.111502333	0.307623386	3.035329659	-0.903089987	0.633338568	3.515916333	0.945290443	0	0.206035843	-0.579524993	0.191068417	-1.296181534	0.221814208	0.296727274	0.166596871	500	103.0179217
1713	4767.032588	2000	3952	1855.795981	95	0.468974426	191.4107404	MAGPHPVIVITGPHEE	Kd	2111.502333	307.6233857	6.863920078	0.000470985	HPVIVITGPH	2	full	9799.832804	full_calibration2.csv	0.000473596	6.90E-05	2	2.111502333	0.307623386	3.596816936	0.301029996	0.633338568	3.515916333	0.945290443	0	0.206035843	-0.579524993	0.191068417	-1.296181534	0.221814208	0.296727274	0.166596871	500	103.0179217
1714	1037.457455	250	1763	1103.821382	86	0.672956848	119.7262389	MAGPHPVIVITGPHEE	Kd	2111.502333	307.6233857	6.863920078	0.000470985	HPVIVITGPH	2	full	9799.832804	full_calibration2.csv	0.000473596	6.90E-05	0.25	2.111502333	0.307623386	3.246252312	-0.602059991	0.633338568	3.515916333	0.945290443	0	0.206035843	-0.579524993	0.191068417	-1.296181534	0.221814208	0.296727274	0.166596871	500	103.0179217
1715	146.3001205	32	285.5	96.75653528	105	0.744499209	9.487758875	MAGPHPVIVITGPHEE	Kd	2111.502333	307.6233857	6.863920078	0.000470985	HPVIVITGPH	2	full	9799.832804	full_calibration2.csv	0.000473596	6.90E-05	0.032	2.111502333	0.307623386	2.455606113	-1.494850022	0.633338568	3.515916333	0.945290443	0	0.206035843	-0.579524993	0.191068417	-1.296181534	0.221814208	0.296727274	0.166596871	500	103.0179217
1716	1876.282605	500	2340.75	960.1139944	94	0.439399673	99.55918336	MAGPHPVIVITGPHEE	Kd	2111.502333	307.6233857	6.863920078	0.000470985	HPVIVITGPH	2	full	9799.832804	full_calibration2.csv	0.000473596	6.90E-05	0.5	2.111502333	0.307623386	3.369355032	-0.301029996	0.633338568	3.515916333	0.945290443	0	0.206035843	-0.579524993	0.191068417	-1.296181534	0.221814208	0.296727274	0.166596871	500	103.0179217
1717	283.9221909	63	541.5	176.0946029	105	0.454499123	17.26749647	MAGPHPVIVITGPHEE	Kd	2111.502333	307.6233857	6.863920078	0.000470985	HPVIVITGPH	2	full	9799.832804	full_calibration2.csv	0.000473596	6.90E-05	0.063	2.111502333	0.307623386	2.733598461	-1.200659451	0.633338568	3.515916333	0.945290443	0	0.206035843	-0.579524993	0.191068417	-1.296181534	0.221814208	0.296727274	0.166596871	500	103.0179217
1718	3307.110498	1000	3534	1213.776701	77	0.368616245	139.2297363	MAGPHPVIVITGPHEE	Kd	1963.261375	281.5905952	6.97204171	0.000432776	HPVIVITGPH	3	full	9799.832804	full_calibration2.csv	0.000509357	7.31E-05	1	1.963261375	0.281590595	3.548266545	0	0.660234631	3.534118914	0.941896922	0	0.206035843	-0.579524993	0.191068417	-1.296181534	0.221814208	0.296727274	0.166596871	500	103.0179217
1719	586.6023837	125	1142.5	380.1290077	71	0.376273529	45.43410652	MAGPHPVIVITGPHEE	Kd	1963.261375	281.5905952	6.97204171	0.000432776	HPVIVITGPH	3	full	9799.832804	full_calibration2.csv	0.000509357	7.31E-05	0.125	1.963261375	0.281590595	3.057856209	-0.903089987	0.660234631	3.534118914	0.941896922	0	0.206035843	-0.579524993	0.191068417	-1.296181534	0.221814208	0.296727274	0.166596871	500	103.0179217
1720	4945.337628	2000	4027.25	1268.292673	50	0.324706199	181.1846676	MAGPHPVIVITGPHEE	Kd	1963.261375	281.5905952	6.97204171	0.000432776	HPVIVITGPH	3	full	9799.832804	full_calibration2.csv	0.000509357	7.31E-05	2	1.963261375	0.281590595	3.60500859	0.301029996	0.660234631	3.534118914	0.941896922	0	0.206035843	-0.579524993	0.191068417	-1.296181534	0.221814208	0.296727274	0.166596871	500	103.0179217
1721	1106.944814	250	1597.75	756.5953226	46	0.545759949	112.7865715	MAGPHPVIVITGPHEE	Kd	1963.261375	281.5905952	6.97204171	0.000432776	HPVIVITGPH	3	full	9799.832804	full_calibration2.csv	0.000509357	7.31E-05	0.25	1.963261375	0.281590595	3.203508826	-0.602059991	0.660234631	3.534118914	0.941896922	0	0.206035843	-0.579524993	0.191068417	-1.296181534	0.221814208	0.296727274	0.166596871	500	103.0179217
1722	157.169709	32	266	126.5173291	65	1.229609209	15.81466613	MAGPHPVIVITGPHEE	Kd	1963.261375	281.5905952	6.97204171	0.000432776	HPVIVITGPH	3	full	9799.832804	full_calibration2.csv	0.000509357	7.31E-05	0.032	1.963261375	0.281590595	2.424881637	-1.494850022	0.660234631	3.534118914	0.941896922	0	0.206035843	-0.579524993	0.191068417	-1.296181534	0.221814208	0.296727274	0.166596871	500	103.0179217
1723	1989.198731	500	2545.25	775.1026485	58	0.321089873	102.6648538	MAGPHPVIVITGPHEE	Kd	1963.261375	281.5905952	6.97204171	0.000432776	HPVIVITGPH	3	full	9799.832804	full_calibration2.csv	0.000509357	7.31E-05	0.5	1.963261375	0.281590595	3.405730446	-0.301029996	0.660234631	3.534118914	0.941896922	0	0.206035843	-0.579524993	0.191068417	-1.296181534	0.221814208	0.296727274	0.166596871	500	103.0179217
1724	304.693893	63	525	209.6042855	64	0.545101456	26.40765776	MAGPHPVIVITGPHEE	Kd	1963.261375	281.5905952	6.97204171	0.000432776	HPVIVITGPH	3	full	9799.832804	full_calibration2.csv	0.000509357	7.31E-05	0.063	1.963261375	0.281590595	2.720159303	-1.200659451	0.660234631	3.534118914	0.941896922	0	0.206035843	-0.579524993	0.191068417	-1.296181534	0.221814208	0.296727274	0.166596871	500	103.0179217
1725	2109.143541	1000	2531.75	1002.44813	100	0.413851695	100.7498278	MAGPHPRIVITGPHEE	Kd	3646.3565	637.798731	5.717095885	0.001240815	HPRIVITGPH	4	full	9799.832804	full_calibration2.csv	0.000274246	4.80E-05	1	3.6463565	0.637798731	3.403420819	0	0.588674741	3.365895981	0.949941659	0.323972948	0.227640693	-0.255552045	0.214188366	-0.972208585	0.242014585	0.620700223	0.192675981	863.4507391	196.5565246
1726	324.8112716	125	821.75	385.7619308	100	0.598326337	38.77053282	MAGPHPRIVITGPHEE	Kd	3646.3565	637.798731	5.717095885	0.001240815	HPRIVITGPH	4	full	9799.832804	full_calibration2.csv	0.000274246	4.80E-05	0.125	3.6463565	0.637798731	2.914739713	-0.903089987	0.588674741	3.365895981	0.949941659	0.323972948	0.227640693	-0.255552045	0.214188366	-0.972208585	0.242014585	0.620700223	0.192675981	863.4507391	196.5565246
1727	3471.205831	2000	2692.75	1035.926606	72	0.401122459	122.9418695	MAGPHPRIVITGPHEE	Kd	3646.3565	637.798731	5.717095885	0.001240815	HPRIVITGPH	4	full	9799.832804	full_calibration2.csv	0.000274246	4.80E-05	2	3.6463565	0.637798731	3.430196035	0.301029996	0.588674741	3.365895981	0.949941659	0.323972948	0.227640693	-0.255552045	0.214188366	-0.972208585	0.242014585	0.620700223	0.192675981	863.4507391	196.5565246
1728	628.7818378	250	1238.75	743.2776857	84	0.690572227	81.58532514	MAGPHPRIVITGPHEE	Kd	3646.3565	637.798731	5.717095885	0.001240815	HPRIVITGPH	4	full	9799.832804	full_calibration2.csv	0.000274246	4.80E-05	0.25	3.6463565	0.637798731	3.092983667	-0.602059991	0.588674741	3.365895981	0.949941659	0.323972948	0.227640693	-0.255552045	0.214188366	-0.972208585	0.242014585	0.620700223	0.192675981	863.4507391	196.5565246
1729	85.25401213	32	243.5	75.73434036	103	0.922279151	7.498817103	MAGPHPRIVITGPHEE	Kd	3646.3565	637.798731	5.717095885	0.001240815	HPRIVITGPH	4	full	9799.832804	full_calibration2.csv	0.000274246	4.80E-05	0.032	3.6463565	0.637798731	2.386498966	-1.494850022	0.588674741	3.365895981	0.949941659	0.323972948	0.227640693	-0.255552045	0.214188366	-0.972208585	0.242014585	0.620700223	0.192675981	863.4507391	196.5565246
1730	1181.740258	500	1635.75	873.2959353	74	0.560988391	102.2115581	MAGPHPRIVITGPHEE	Kd	3646.3565	637.798731	5.717095885	0.001240815	HPRIVITGPH	4	full	9799.832804	full_calibration2.csv	0.000274246	4.80E-05	0.5	3.6463565	0.637798731	3.213716929	-0.301029996	0.588674741	3.365895981	0.949941659	0.323972948	0.227640693	-0.255552045	0.214188366	-0.972208585	0.242014585	0.620700223	0.192675981	863.4507391	196.5565246
1731	166.4411244	63	443.5	173.462354	91	0.614935009	18.28453757	MAGPHPRIVITGPHEE	Kd	3646.3565	637.798731	5.717095885	0.001240815	HPRIVITGPH	4	full	9799.832804	full_calibration2.csv	0.000274246	4.80E-05	0.063	3.6463565	0.637798731	2.646893624	-1.200659451	0.588674741	3.365895981	0.949941659	0.323972948	0.227640693	-0.255552045	0.214188366	-0.972208585	0.242014585	0.620700223	0.192675981	863.4507391	196.5565246
1732	4324.842339	1000	4230	1575.128192	75	0.389750726	183.104933	MAGPHPLIVITGPHEE	Kd	1265.939897	127.4728042	9.931058662	6.02E-05	HPLIVITGPH	5	full	9799.832804	full_calibration2.csv	0.000789927	7.95E-05	1	1.265939897	0.127472804	3.626340367	0	0.663512567	3.633662947	0.948346278	-0.303369817	0.177100836	-0.882894811	0.159439886	-1.599551351	0.195231863	-0.006642543	0.12910637	299.7723178	53.08992814
1733	880.6844231	125	1212	658.7673372	75	0.549235193	76.58014744	MAGPHPLIVITGPHEE	Kd	1265.939897	127.4728042	9.931058662	6.02E-05	HPLIVITGPH	5	full	9799.832804	full_calibration2.csv	0.000789927	7.95E-05	0.125	1.265939897	0.127472804	3.08350262	-0.903089987	0.663512567	3.633662947	0.948346278	-0.303369817	0.177100836	-0.882894811	0.159439886	-1.599551351	0.195231863	-0.006642543	0.12910637	299.7723178	53.08992814
1734	6001.232793	2000	5348	2330.097171	61	0.455428847	300.8142512	MAGPHPLIVITGPHEE	Kd	1265.939897	127.4728042	9.931058662	6.02E-05	HPLIVITGPH	5	full	9799.832804	full_calibration2.csv	0.000789927	7.95E-05	2	1.265939897	0.127472804	3.728191399	0.301029996	0.663512567	3.633662947	0.948346278	-0.303369817	0.177100836	-0.882894811	0.159439886	-1.599551351	0.195231863	-0.006642543	0.12910637	299.7723178	53.08992814
1735	1616.131488	250	2246.5	1453.092582	63	0.712147904	184.5429424	MAGPHPLIVITGPHEE	Kd	1265.939897	127.4728042	9.931058662	6.02E-05	HPLIVITGPH	5	full	9799.832804	full_calibration2.csv	0.000789927	7.95E-05	0.25	1.265939897	0.127472804	3.351506423	-0.602059991	0.663512567	3.633662947	0.948346278	-0.303369817	0.177100836	-0.882894811	0.159439886	-1.599551351	0.195231863	-0.006642543	0.12910637	299.7723178	53.08992814
1736	241.609531	32	319.25	690.0234888	74	7.514604587	80.76114072	MAGPHPLIVITGPHEE	Kd	1265.939897	127.4728042	9.931058662	6.02E-05	HPLIVITGPH	5	full	9799.832804	full_calibration2.csv	0.000789927	7.95E-05	0.032	1.265939897	0.127472804	2.504130906	-1.494850022	0.663512567	3.633662947	0.948346278	-0.303369817	0.177100836	-0.882894811	0.159439886	-1.599551351	0.195231863	-0.006642543	0.12910637	299.7723178	53.08992814
1737	2774.679031	500	3020	964.1780614	60	0.318484744	125.5252918	MAGPHPLIVITGPHEE	Kd	1265.939897	127.4728042	9.931058662	6.02E-05	HPLIVITGPH	5	full	9799.832804	full_calibration2.csv	0.000789927	7.95E-05	0.5	1.265939897	0.127472804	3.480006943	-0.301029996	0.663512567	3.633662947	0.948346278	-0.303369817	0.177100836	-0.882894811	0.159439886	-1.599551351	0.195231863	-0.006642543	0.12910637	299.7723178	53.08992814
1738	464.5729037	63	749.5	306.1925163	68	0.511260678	37.40736958	MAGPHPLIVITGPHEE	Kd	1265.939897	127.4728042	9.931058662	6.02E-05	HPLIVITGPH	5	full	9799.832804	full_calibration2.csv	0.000789927	7.95E-05	0.063	1.265939897	0.127472804	2.874771637	-1.200659451	0.663512567	3.633662947	0.948346278	-0.303369817	0.177100836	-0.882894811	0.159439886	-1.599551351	0.195231863	-0.006642543	0.12910637	299.7723178	53.08992814
1739	4096.475211	1000	4295	1552.35456	94	0.37544387	160.9716691	MAGPHPLIVITGPHEE	Kd	1392.25976	169.1711366	8.229889497	0.000173809	HPLIVITGPH	6	full	9799.832804	full_calibration2.csv	0.000718257	8.73E-05	1	1.39225976	0.169171137	3.632963168	0	0.653870565	3.611905878	0.94509596	-0.303369817	0.177100836	-0.882894811	0.159439886	-1.599551351	0.195231863	-0.006642543	0.12910637	299.7723178	53.08992814
1740	807.3628082	125	1270	651.061105	69	0.548144912	78.95275602	MAGPHPLIVITGPHEE	Kd	1392.25976	169.1711366	8.229889497	0.000173809	HPLIVITGPH	6	full	9799.832804	full_calibration2.csv	0.000718257	8.73E-05	0.125	1.39225976	0.169171137	3.103803721	-0.903089987	0.653870565	3.611905878	0.94509596	-0.303369817	0.177100836	-0.882894811	0.159439886	-1.599551351	0.195231863	-0.006642543	0.12910637	299.7723178	53.08992814
1741	5777.760842	2000	4880	1755.755485	66	0.369972613	217.7746656	MAGPHPLIVITGPHEE	Kd	1392.25976	169.1711366	8.229889497	0.000173809	HPLIVITGPH	6	full	9799.832804	full_calibration2.csv	0.000718257	8.73E-05	2	1.39225976	0.169171137	3.688419822	0.301029996	0.653870565	3.611905878	0.94509596	-0.303369817	0.177100836	-0.882894811	0.159439886	-1.599551351	0.195231863	-0.006642543	0.12910637	299.7723178	53.08992814
1742	1491.821368	250	2065.5	914.3032698	69	0.467663906	110.8755575	MAGPHPLIVITGPHEE	Kd	1392.25976	169.1711366	8.229889497	0.000173809	HPLIVITGPH	6	full	9799.832804	full_calibration2.csv	0.000718257	8.73E-05	0.25	1.39225976	0.169171137	3.315025199	-0.602059991	0.653870565	3.611905878	0.94509596	-0.303369817	0.177100836	-0.882894811	0.159439886	-1.599551351	0.195231863	-0.006642543	0.12910637	299.7723178	53.08992814
1743	220.1807975	32	314.5	237.1009705	79	1.730743975	26.84639837	MAGPHPLIVITGPHEE	Kd	1392.25976	169.1711366	8.229889497	0.000173809	HPLIVITGPH	6	full	9799.832804	full_calibration2.csv	0.000718257	8.73E-05	0.032	1.39225976	0.169171137	2.49762065	-1.494850022	0.653870565	3.611905878	0.94509596	-0.303369817	0.177100836	-0.882894811	0.159439886	-1.599551351	0.195231863	-0.006642543	0.12910637	299.7723178	53.08992814
1744	2589.452308	500	2827.5	1227.421484	56	0.417173569	165.5054792	MAGPHPLIVITGPHEE	Kd	1392.25976	169.1711366	8.229889497	0.000173809	HPLIVITGPH	6	full	9799.832804	full_calibration2.csv	0.000718257	8.73E-05	0.5	1.39225976	0.169171137	3.451402614	-0.301029996	0.653870565	3.611905878	0.94509596	-0.303369817	0.177100836	-0.882894811	0.159439886	-1.599551351	0.195231863	-0.006642543	0.12910637	299.7723178	53.08992814
1745	424.246917	63	703.75	336.4246162	72	0.575221381	39.92625639	MAGPHPLIVITGPHEE	Kd	1392.25976	169.1711366	8.229889497	0.000173809	HPLIVITGPH	6	full	9799.832804	full_calibration2.csv	0.000718257	8.73E-05	0.063	1.39225976	0.169171137	2.847418408	-1.200659451	0.653870565	3.611905878	0.94509596	-0.303369817	0.177100836	-0.882894811	0.159439886	-1.599551351	0.195231863	-0.006642543	0.12910637	299.7723178	53.08992814
1746	153.3043432	1000	199.5	463.5514522	72	-45.90880958	55.01343612	MAGPHPVIVIEGPHEE	Kd	62924.03892	17480.59022	3.59965185	0.01137126	HPVIVIEGPH	7	full	9799.832804	full_calibration2.csv	1.59E-05	4.41E-06	1	62.92403892	17.48059022	2.2999429	0	0.161592704	2.26359873	0.685654384	2.01295544	0.313689025	1.433430447	0.304067716	0.716773907	0.324270841	2.309682715	0.289317392	14900.30059	4674.060767
1747	19.42898927	125	121.25	593.1636655	80	-5.596873649	66.73612633	MAGPHPVIVIEGPHEE	Kd	62924.03892	17480.59022	3.59965185	0.01137126	HPVIVIEGPH	7	full	9799.832804	full_calibration2.csv	1.59E-05	4.41E-06	0.125	62.92403892	17.48059022	2.083681747	-0.903089987	0.161592704	2.26359873	0.685654384	2.01295544	0.313689025	1.433430447	0.304067716	0.716773907	0.324270841	2.309682715	0.289317392	14900.30059	4674.060767
1748	301.8861108	2000	238	260.6030109	62	2.312658223	33.36679642	MAGPHPVIVIEGPHEE	Kd	62924.03892	17480.59022	3.59965185	0.01137126	HPVIVIEGPH	7	full	9799.832804	full_calibration2.csv	1.59E-05	4.41E-06	2	62.92403892	17.48059022	2.376576957	0.301029996	0.161592704	2.26359873	0.685654384	2.01295544	0.313689025	1.433430447	0.304067716	0.716773907	0.324270841	2.309682715	0.289317392	14900.30059	4674.060767
1749	38.78109177	250	120	444.4120986	83	-4.235898505	49.07710625	MAGPHPVIVIEGPHEE	Kd	62924.03892	17480.59022	3.59965185	0.01137126	HPVIVIEGPH	7	full	9799.832804	full_calibration2.csv	1.59E-05	4.41E-06	0.25	62.92403892	17.48059022	2.079181246	-0.602059991	0.161592704	2.26359873	0.685654384	2.01295544	0.313689025	1.433430447	0.304067716	0.716773907	0.324270841	2.309682715	0.289317392	14900.30059	4674.060767
1750	4.981168687	32	123.25	43.58327114	80	-0.841071449	4.903501104	MAGPHPVIVIEGPHEE	Kd	62924.03892	17480.59022	3.59965185	0.01137126	HPVIVIEGPH	7	full	9799.832804	full_calibration2.csv	1.59E-05	4.41E-06	0.032	62.92403892	17.48059022	2.090786928	-1.494850022	0.161592704	2.26359873	0.685654384	2.01295544	0.313689025	1.433430447	0.304067716	0.716773907	0.324270841	2.309682715	0.289317392	14900.30059	4674.060767
1751	77.25645489	500	141.5	105.2792642	76	-16.34570802	12.1566023	MAGPHPVIVIEGPHEE	Kd	62924.03892	17480.59022	3.59965185	0.01137126	HPVIVIEGPH	7	full	9799.832804	full_calibration2.csv	1.59E-05	4.41E-06	0.5	62.92403892	17.48059022	2.15075644	-0.301029996	0.161592704	2.26359873	0.685654384	2.01295544	0.313689025	1.433430447	0.304067716	0.716773907	0.324270841	2.309682715	0.289317392	14900.30059	4674.060767
1752	9.801849352	63	121.75	211.3017333	50	-2.800553125	30.1859619	MAGPHPVIVIEGPHEE	Kd	62924.03892	17480.59022	3.59965185	0.01137126	HPVIVIEGPH	7	full	9799.832804	full_calibration2.csv	1.59E-05	4.41E-06	0.063	62.92403892	17.48059022	2.08546897	-1.200659451	0.161592704	2.26359873	0.685654384	2.01295544	0.313689025	1.433430447	0.304067716	0.716773907	0.324270841	2.309682715	0.289317392	14900.30059	4674.060767
1753	163.0581724	1000	200	326.2263772	70	3.952890151	39.27304072	MAGPHPVIVIEGPHEE	Kd	59100.2247	15455.73843	3.823837016	0.008721587	HPVIVIEGPH	8	full	9799.832804	full_calibration2.csv	1.69E-05	4.42E-06	1	59.1002247	15.45573843	2.301029996	0	0.173156241	2.283785161	0.704766938	2.01295544	0.313689025	1.433430447	0.304067716	0.716773907	0.324270841	2.309682715	0.289317392	14900.30059	4674.060767
1754	20.68340148	125	122.5	169.0828168	92	-2.522396489	17.7246953	MAGPHPVIVIEGPHEE	Kd	59100.2247	15455.73843	3.823837016	0.008721587	HPVIVIEGPH	8	full	9799.832804	full_calibration2.csv	1.69E-05	4.42E-06	0.125	59.1002247	15.45573843	2.088136089	-0.903089987	0.173156241	2.283785161	0.704766938	2.01295544	0.313689025	1.433430447	0.304067716	0.716773907	0.324270841	2.309682715	0.289317392	14900.30059	4674.060767
1755	320.7789448	2000	262	459.9796559	75	2.563322376	53.47154887	MAGPHPVIVIEGPHEE	Kd	59100.2247	15455.73843	3.823837016	0.008721587	HPVIVIEGPH	8	full	9799.832804	full_calibration2.csv	1.69E-05	4.42E-06	2	59.1002247	15.45573843	2.418301291	0.301029996	0.173156241	2.283785161	0.704766938	2.01295544	0.313689025	1.433430447	0.304067716	0.716773907	0.324270841	2.309682715	0.289317392	14900.30059	4674.060767
1756	41.27967861	250	134.5	191.088869	62	-464.6082304	24.46642257	MAGPHPVIVIEGPHEE	Kd	59100.2247	15455.73843	3.823837016	0.008721587	HPVIVIEGPH	8	full	9799.832804	full_calibration2.csv	1.69E-05	4.42E-06	0.25	59.1002247	15.45573843	2.128722284	-0.602059991	0.173156241	2.283785161	0.704766938	2.01295544	0.313689025	1.433430447	0.304067716	0.716773907	0.324270841	2.309682715	0.289317392	14900.30059	4674.060767
1757	5.303278395	32	125	249.4534169	91	-3.453561682	26.29469891	MAGPHPVIVIEGPHEE	Kd	59100.2247	15455.73843	3.823837016	0.008721587	HPVIVIEGPH	8	full	9799.832804	full_calibration2.csv	1.69E-05	4.42E-06	0.032	59.1002247	15.45573843	2.096910013	-1.494850022	0.173156241	2.283785161	0.704766938	2.01295544	0.313689025	1.433430447	0.304067716	0.716773907	0.324270841	2.309682715	0.289317392	14900.30059	4674.060767
1758	82.21305249	500	138.5	48.53414255	78	-1.600364878	5.530978863	MAGPHPVIVIEGPHEE	Kd	59100.2247	15455.73843	3.823837016	0.008721587	HPVIVIEGPH	8	full	9799.832804	full_calibration2.csv	1.69E-05	4.42E-06	0.5	59.1002247	15.45573843	2.141449773	-0.301029996	0.173156241	2.283785161	0.704766938	2.01295544	0.313689025	1.433430447	0.304067716	0.716773907	0.324270841	2.309682715	0.289317392	14900.30059	4674.060767
1759	10.43535862	63	121.5	80.02860214	65	-2.408825718	10.00357527	MAGPHPVIVIEGPHEE	Kd	59100.2247	15455.73843	3.823837016	0.008721587	HPVIVIEGPH	8	full	9799.832804	full_calibration2.csv	1.69E-05	4.42E-06	0.063	59.1002247	15.45573843	2.084576278	-1.200659451	0.173156241	2.283785161	0.704766938	2.01295544	0.313689025	1.433430447	0.304067716	0.716773907	0.324270841	2.309682715	0.289317392	14900.30059	4674.060767
1760	2334.803664	1000	2672.5	962.804329	95	0.368514527	99.3056841	MAGPHPRIVITGPHEE	Kd	3197.283462	445.3588825	7.179116859	0.000369114	HPRIVITGPH	9	full	9799.832804	full_calibration2.csv	0.000312766	4.36E-05	1	3.197283462	0.445358883	3.426917714	0	0.627205414	3.394819682	0.969620994	0.323972948	0.227640693	-0.255552045	0.214188366	-0.972208585	0.242014585	0.620700223	0.192675981	863.4507391	196.5565246
1761	368.7160095	125	815	674.0675506	101	1.120570526	67.40675506	MAGPHPRIVITGPHEE	Kd	3197.283462	445.3588825	7.179116859	0.000369114	HPRIVITGPH	9	full	9799.832804	full_calibration2.csv	0.000312766	4.36E-05	0.125	3.197283462	0.445358883	2.911157609	-0.903089987	0.627205414	3.394819682	0.969620994	0.323972948	0.227640693	-0.255552045	0.214188366	-0.972208585	0.242014585	0.620700223	0.192675981	863.4507391	196.5565246
1762	3771.136547	2000	3089.5	2346.363728	83	0.782545514	259.1125273	MAGPHPRIVITGPHEE	Kd	3197.283462	445.3588825	7.179116859	0.000369114	HPRIVITGPH	9	full	9799.832804	full_calibration2.csv	0.000312766	4.36E-05	2	3.197283462	0.445358883	3.4898882	0.301029996	0.627205414	3.394819682	0.969620994	0.323972948	0.227640693	-0.255552045	0.214188366	-0.972208585	0.242014585	0.620700223	0.192675981	863.4507391	196.5565246
1763	710.6924128	250	1163	836.7794303	88	0.815262973	89.71217162	MAGPHPRIVITGPHEE	Kd	3197.283462	445.3588825	7.179116859	0.000369114	HPRIVITGPH	9	full	9799.832804	full_calibration2.csv	0.000312766	4.36E-05	0.25	3.197283462	0.445358883	3.065579715	-0.602059991	0.627205414	3.394819682	0.969620994	0.323972948	0.227640693	-0.255552045	0.214188366	-0.972208585	0.242014585	0.620700223	0.192675981	863.4507391	196.5565246
1764	97.10966951	32	248	60.64454905	95	0.699348405	6.255007636	MAGPHPRIVITGPHEE	Kd	3197.283462	445.3588825	7.179116859	0.000369114	HPRIVITGPH	9	full	9799.832804	full_calibration2.csv	0.000312766	4.36E-05	0.032	3.197283462	0.445358883	2.394451681	-1.494850022	0.627205414	3.394819682	0.969620994	0.323972948	0.227640693	-0.255552045	0.214188366	-0.972208585	0.242014585	0.620700223	0.192675981	863.4507391	196.5565246
1765	1325.274746	500	1736	876.9202859	97	0.592920524	89.5003019	MAGPHPRIVITGPHEE	Kd	3197.283462	445.3588825	7.179116859	0.000369114	HPRIVITGPH	9	full	9799.832804	full_calibration2.csv	0.000312766	4.36E-05	0.5	3.197283462	0.445358883	3.239549721	-0.301029996	0.627205414	3.394819682	0.969620994	0.323972948	0.227640693	-0.255552045	0.214188366	-0.972208585	0.242014585	0.620700223	0.192675981	863.4507391	196.5565246
1766	189.3668063	63	399.5	275.9544557	125	1.029373529	24.78144168	MAGPHPRIVITGPHEE	Kd	3197.283462	445.3588825	7.179116859	0.000369114	HPRIVITGPH	9	full	9799.832804	full_calibration2.csv	0.000312766	4.36E-05	0.063	3.197283462	0.445358883	2.601516784	-1.200659451	0.627205414	3.394819682	0.969620994	0.323972948	0.227640693	-0.255552045	0.214188366	-0.972208585	0.242014585	0.620700223	0.192675981	863.4507391	196.5565246
1767	439.1468	1000	527.5	401.5231692	52	0.870075626	56.22448971	MAGPHPVIVLTGPHEE	Kd	21315.6193	2793.668733	7.629973821	0.000264363	HPVIVLTGPH	10	full	9799.832804	full_calibration2.csv	4.69E-05	6.15E-06	1	21.3156193	2.793668733	2.722222464	0	0.449971781	2.691032947	0.955440866	1.37103996	0.195965928	0.791514966	0.180163859	0.074858426	0.212493339	1.667767234	0.153968807	5047.500769	989.1381729
1768	57.13356893	125	176	818.1173786	61	-899.1920738	105.6184994	MAGPHPVIVLTGPHEE	Kd	21315.6193	2793.668733	7.629973821	0.000264363	HPVIVLTGPH	10	full	9799.832804	full_calibration2.csv	4.69E-05	6.15E-06	0.125	21.3156193	2.793668733	2.245512668	-0.903089987	0.449971781	2.691032947	0.955440866	1.37103996	0.195965928	0.791514966	0.180163859	0.074858426	0.212493339	1.667767234	0.153968807	5047.500769	989.1381729
1769	840.6238478	2000	728	474.8846921	81	0.755725261	53.09372265	MAGPHPVIVLTGPHEE	Kd	21315.6193	2793.668733	7.629973821	0.000264363	HPVIVLTGPH	10	full	9799.832804	full_calibration2.csv	4.69E-05	6.15E-06	2	21.3156193	2.793668733	2.862131379	0.301029996	0.449971781	2.691032947	0.955440866	1.37103996	0.195965928	0.791514966	0.180163859	0.074858426	0.212493339	1.667767234	0.153968807	5047.500769	989.1381729
1770	113.6048155	250	244	159.9080768	51	1.607274718	22.6144171	MAGPHPVIVLTGPHEE	Kd	21315.6193	2793.668733	7.629973821	0.000264363	HPVIVLTGPH	10	full	9799.832804	full_calibration2.csv	4.69E-05	6.15E-06	0.25	21.3156193	2.793668733	2.387389826	-0.602059991	0.449971781	2.691032947	0.955440866	1.37103996	0.195965928	0.791514966	0.180163859	0.074858426	0.212493339	1.667767234	0.153968807	5047.500769	989.1381729
1771	14.68991204	32	131.25	101.5572689	72	-1.950940063	12.05263039	MAGPHPVIVLTGPHEE	Kd	21315.6193	2793.668733	7.629973821	0.000264363	HPVIVLTGPH	10	full	9799.832804	full_calibration2.csv	4.69E-05	6.15E-06	0.032	21.3156193	2.793668733	2.118099312	-1.494850022	0.449971781	2.691032947	0.955440866	1.37103996	0.195965928	0.791514966	0.180163859	0.074858426	0.212493339	1.667767234	0.153968807	5047.500769	989.1381729
1772	224.6058815	500	332.5	208.45366	66	1.040376706	25.85549439	MAGPHPVIVLTGPHEE	Kd	21315.6193	2793.668733	7.629973821	0.000264363	HPVIVLTGPH	10	full	9799.832804	full_calibration2.csv	4.69E-05	6.15E-06	0.5	21.3156193	2.793668733	2.52179165	-0.301029996	0.449971781	2.691032947	0.955440866	1.37103996	0.195965928	0.791514966	0.180163859	0.074858426	0.212493339	1.667767234	0.153968807	5047.500769	989.1381729
1773	28.87882786	63	123	897.2996276	41	-3.887903274	141.8755283	MAGPHPVIVLTGPHEE	Kd	21315.6193	2793.668733	7.629973821	0.000264363	HPVIVLTGPH	10	full	9799.832804	full_calibration2.csv	4.69E-05	6.15E-06	0.063	21.3156193	2.793668733	2.089905111	-1.200659451	0.449971781	2.691032947	0.955440866	1.37103996	0.195965928	0.791514966	0.180163859	0.074858426	0.212493339	1.667767234	0.153968807	5047.500769	989.1381729
1774	469.7294288	1000	547.5	1024.924749	66	1.844747156	127.1262693	MAGPHPVIVLTGPHEE	Kd	19862.71842	2435.45688	8.15564364	0.000182805	HPVIVLTGPH	11	full	9799.832804	full_calibration2.csv	5.03E-05	6.17E-06	1	19.86271842	2.43545688	2.738384124	0	0.457799763	2.714557385	0.960635218	1.37103996	0.195965928	0.791514966	0.180163859	0.074858426	0.212493339	1.667767234	0.153968807	5047.500769	989.1381729
1775	61.28658985	125	172	1546.043028	93	-7.47230026	161.186128	MAGPHPVIVLTGPHEE	Kd	19862.71842	2435.45688	8.15564364	0.000182805	HPVIVLTGPH	11	full	9799.832804	full_calibration2.csv	5.03E-05	6.17E-06	0.125	19.86271842	2.43545688	2.235528447	-0.903089987	0.457799763	2.714557385	0.960635218	1.37103996	0.195965928	0.791514966	0.180163859	0.074858426	0.212493339	1.667767234	0.153968807	5047.500769	989.1381729
1776	896.4880412	2000	787.75	583.7889978	106	0.827460504	56.97197256	MAGPHPVIVLTGPHEE	Kd	19862.71842	2435.45688	8.15564364	0.000182805	HPVIVLTGPH	11	full	9799.832804	full_calibration2.csv	5.03E-05	6.17E-06	2	19.86271842	2.43545688	2.896388412	0.301029996	0.457799763	2.714557385	0.960635218	1.37103996	0.195965928	0.791514966	0.180163859	0.074858426	0.212493339	1.667767234	0.153968807	5047.500769	989.1381729
1777	121.8113907	250	253	260.3058106	79	3.526392702	29.47382912	MAGPHPVIVLTGPHEE	Kd	19862.71842	2435.45688	8.15564364	0.000182805	HPVIVLTGPH	11	full	9799.832804	full_calibration2.csv	5.03E-05	6.17E-06	0.25	19.86271842	2.43545688	2.403120521	-0.602059991	0.457799763	2.714557385	0.960635218	1.37103996	0.195965928	0.791514966	0.180163859	0.074858426	0.212493339	1.667767234	0.153968807	5047.500769	989.1381729
1778	15.76270863	32	132	190.0365434	81	-8.205202566	21.24673146	MAGPHPVIVLTGPHEE	Kd	19862.71842	2435.45688	8.15564364	0.000182805	HPVIVLTGPH	11	full	9799.832804	full_calibration2.csv	5.03E-05	6.17E-06	0.032	19.86271842	2.43545688	2.120573931	-1.494850022	0.457799763	2.714557385	0.960635218	1.37103996	0.195965928	0.791514966	0.180163859	0.074858426	0.212493339	1.667767234	0.153968807	5047.500769	989.1381729
1779	240.6317419	500	352	577.0144168	111	1.919375486	55.01616599	MAGPHPVIVLTGPHEE	Kd	19862.71842	2435.45688	8.15564364	0.000182805	HPVIVLTGPH	11	full	9799.832804	full_calibration2.csv	5.03E-05	6.17E-06	0.5	19.86271842	2.43545688	2.546542663	-0.301029996	0.457799763	2.714557385	0.960635218	1.37103996	0.195965928	0.791514966	0.180163859	0.074858426	0.212493339	1.667767234	0.153968807	5047.500769	989.1381729
1780	30.98455241	63	137.5	92.27064143	68	-1.984001144	11.27265299	MAGPHPVIVLTGPHEE	Kd	19862.71842	2435.45688	8.15564364	0.000182805	HPVIVLTGPH	11	full	9799.832804	full_calibration2.csv	5.03E-05	6.17E-06	0.063	19.86271842	2.43545688	2.138302698	-1.200659451	0.457799763	2.714557385	0.960635218	1.37103996	0.195965928	0.791514966	0.180163859	0.074858426	0.212493339	1.667767234	0.153968807	5047.500769	989.1381729
1781	7687.374762	1000	7555.5	2351.202872	97	0.309131248	239.9686383	MAGPIPVIVITGPHEE	Kd	274.7957667	27.78867055	9.888769821	6.17E-05	IPVIVITGPH	12	full	9799.832804	full_calibration2.csv	0.003639066	0.000368	1	0.274795767	0.027788671	3.87826321	0	0.423180822	3.861275166	0.927259686	-1.209202207	0.177346024	-1.7887272	0.159712189	-2.50538374	0.195454307	-0.912474932	0.1294425	65.0711492	11.54010959
1782	3064.012185	125	3449.5	2237.057825	81	0.717175983	250.1106683	MAGPIPVIVITGPHEE	Kd	274.7957667	27.78867055	9.888769821	6.17E-05	IPVIVITGPH	12	full	9799.832804	full_calibration2.csv	0.003639066	0.000368	0.125	0.274795767	0.027788671	3.537756149	-0.903089987	0.423180822	3.861275166	0.927259686	-1.209202207	0.177346024	-1.7887272	0.159712189	-2.50538374	0.195454307	-0.912474932	0.1294425	65.0711492	11.54010959
1783	8616.011114	2000	7879.75	4581.099133	78	0.521166367	522.064698	MAGPIPVIVITGPHEE	Kd	274.7957667	27.78867055	9.888769821	6.17E-05	IPVIVITGPH	12	full	9799.832804	full_calibration2.csv	0.003639066	0.000368	2	0.274795767	0.027788671	3.896512439	0.301029996	0.423180822	3.861275166	0.927259686	-1.209202207	0.177346024	-1.7887272	0.159712189	-2.50538374	0.195454307	-0.912474932	0.1294425	65.0711492	11.54010959
1784	4668.403132	250	4815	1947.288442	78	0.395782599	221.9141134	MAGPIPVIVITGPHEE	Kd	274.7957667	27.78867055	9.888769821	6.17E-05	IPVIVITGPH	12	full	9799.832804	full_calibration2.csv	0.003639066	0.000368	0.25	0.274795767	0.027788671	3.682596291	-0.602059991	0.423180822	3.861275166	0.927259686	-1.209202207	0.177346024	-1.7887272	0.159712189	-2.50538374	0.195454307	-0.912474932	0.1294425	65.0711492	11.54010959
1785	1022.160942	32	1343.5	553.2484294	64	0.454819166	69.70275036	MAGPIPVIVITGPHEE	Kd	274.7957667	27.78867055	9.888769821	6.17E-05	IPVIVITGPH	12	full	9799.832804	full_calibration2.csv	0.003639066	0.000368	0.032	0.274795767	0.027788671	3.128237671	-1.494850022	0.423180822	3.861275166	0.927259686	-1.209202207	0.177346024	-1.7887272	0.159712189	-2.50538374	0.195454307	-0.912474932	0.1294425	65.0711492	11.54010959
1786	6324.139357	500	5783	2034.471837	95	0.34563324	209.8397478	MAGPIPVIVITGPHEE	Kd	274.7957667	27.78867055	9.888769821	6.17E-05	IPVIVITGPH	12	full	9799.832804	full_calibration2.csv	0.003639066	0.000368	0.5	0.274795767	0.027788671	3.762153192	-0.301029996	0.423180822	3.861275166	0.927259686	-1.209202207	0.177346024	-1.7887272	0.159712189	-2.50538374	0.195454307	-0.912474932	0.1294425	65.0711492	11.54010959
1787	1827.700426	63	2321.5	980.6962915	66	0.426137042	121.6404042	MAGPIPVIVITGPHEE	Kd	274.7957667	27.78867055	9.888769821	6.17E-05	IPVIVITGPH	12	full	9799.832804	full_calibration2.csv	0.003639066	0.000368	0.063	0.274795767	0.027788671	3.365768688	-1.200659451	0.423180822	3.861275166	0.927259686	-1.209202207	0.177346024	-1.7887272	0.159712189	-2.50538374	0.195454307	-0.912474932	0.1294425	65.0711492	11.54010959
1788	7827.803299	1000	7073.75	3762.270836	72	0.483823349	446.4994022	MAGPIPVIVITGPHEE	Kd	251.9262977	32.12229679	7.842723682	0.000227126	IPVIVITGPH	13	full	9799.832804	full_calibration2.csv	0.003969415	0.000506127	1	0.251926298	0.032122297	3.849649707	0	0.39401759	3.864536945	0.908402954	-1.209202207	0.177346024	-1.7887272	0.159712189	-2.50538374	0.195454307	-0.912474932	0.1294425	65.0711492	11.54010959
1789	3249.916782	125	3835	1321.061235	73	0.374308033	155.6885596	MAGPIPVIVITGPHEE	Kd	251.9262977	32.12229679	7.842723682	0.000227126	IPVIVITGPH	13	full	9799.832804	full_calibration2.csv	0.003969415	0.000506127	0.125	0.251926298	0.032122297	3.583765368	-0.903089987	0.39401759	3.864536945	0.908402954	-1.209202207	0.177346024	-1.7887272	0.159712189	-2.50538374	0.195454307	-0.912474932	0.1294425	65.0711492	11.54010959
1790	8703.511135	2000	8162	4337.76203	81	0.482940102	484.9765385	MAGPIPVIVITGPHEE	Kd	251.9262977	32.12229679	7.842723682	0.000227126	IPVIVITGPH	13	full	9799.832804	full_calibration2.csv	0.003969415	0.000506127	2	0.251926298	0.032122297	3.91179659	0.301029996	0.39401759	3.864536945	0.908402954	-1.209202207	0.177346024	-1.7887272	0.159712189	-2.50538374	0.195454307	-0.912474932	0.1294425	65.0711492	11.54010959
1791	4881.111454	250	5052	1619.314328	66	0.32712019	200.8512229	MAGPIPVIVITGPHEE	Kd	251.9262977	32.12229679	7.842723682	0.000227126	IPVIVITGPH	13	full	9799.832804	full_calibration2.csv	0.003969415	0.000506127	0.25	0.251926298	0.032122297	3.703463342	-0.602059991	0.39401759	3.864536945	0.908402954	-1.209202207	0.177346024	-1.7887272	0.159712189	-2.50538374	0.195454307	-0.912474932	0.1294425	65.0711492	11.54010959
1792	1104.493146	32	1435.25	543.2064077	66	0.409632181	67.37646261	MAGPIPVIVITGPHEE	Kd	251.9262977	32.12229679	7.842723682	0.000227126	IPVIVITGPH	13	full	9799.832804	full_calibration2.csv	0.003969415	0.000506127	0.032	0.251926298	0.032122297	3.156927556	-1.494850022	0.39401759	3.864536945	0.908402954	-1.209202207	0.177346024	-1.7887272	0.159712189	-2.50538374	0.195454307	-0.912474932	0.1294425	65.0711492	11.54010959
1793	6516.484949	500	5896.75	1878.543826	86	0.321195215	203.7566861	MAGPIPVIVITGPHEE	Kd	251.9262977	32.12229679	7.842723682	0.000227126	IPVIVITGPH	13	full	9799.832804	full_calibration2.csv	0.003969415	0.000506127	0.5	0.251926298	0.032122297	3.770612716	-0.301029996	0.39401759	3.864536945	0.908402954	-1.209202207	0.177346024	-1.7887272	0.159712189	-2.50538374	0.195454307	-0.912474932	0.1294425	65.0711492	11.54010959
1794	1960.425252	63	2632.75	686.9395714	78	0.274930212	78.28402955	MAGPIPVIVITGPHEE	Kd	251.9262977	32.12229679	7.842723682	0.000227126	IPVIVITGPH	13	full	9799.832804	full_calibration2.csv	0.003969415	0.000506127	0.063	0.251926298	0.032122297	3.420409621	-1.200659451	0.39401759	3.864536945	0.908402954	-1.209202207	0.177346024	-1.7887272	0.159712189	-2.50538374	0.195454307	-0.912474932	0.1294425	65.0711492	11.54010959
1795	534.3996392	1000	664.5	346.9127203	84	0.826791179	38.07861802	MAGPHPVIVITGLHEE	Kd	17338.02287	1979.020586	8.760910821	0.000122496	HPVIVITGLH	14	full	9799.832804	full_calibration2.csv	5.77E-05	6.58E-06	1	17.33802287	1.979020586	2.822494985	0	0.472546073	2.755079425	0.932581433	1.24856283	0.185078622	0.669037837	0.168257147	-0.047618703	0.202496593	1.545290105	0.139849365	4105.613003	759.8611968
1796	70.14702493	125	174.5	137.5605489	76	20.37934057	15.88412398	MAGPHPVIVITGLHEE	Kd	17338.02287	1979.020586	8.760910821	0.000122496	HPVIVITGLH	14	full	9799.832804	full_calibration2.csv	5.77E-05	6.58E-06	0.125	17.33802287	1.979020586	2.241795431	-0.903089987	0.472546073	2.755079425	0.932581433	1.24856283	0.185078622	0.669037837	0.168257147	-0.047618703	0.202496593	1.545290105	0.139849365	4105.613003	759.8611968
1797	1013.529963	2000	886.5	1110.403657	75	1.777821585	129.0818032	MAGPHPVIVITGLHEE	Kd	17338.02287	1979.020586	8.760910821	0.000122496	HPVIVITGLH	14	full	9799.832804	full_calibration2.csv	5.77E-05	6.58E-06	2	17.33802287	1.979020586	2.94767874	0.301029996	0.472546073	2.755079425	0.932581433	1.24856283	0.185078622	0.669037837	0.168257147	-0.047618703	0.202496593	1.545290105	0.139849365	4105.613003	759.8611968
1798	139.2969647	250	250.5	666.730934	78	-38.72301776	75.98104159	MAGPHPVIVITGLHEE	Kd	17338.02287	1979.020586	8.760910821	0.000122496	HPVIVITGLH	14	full	9799.832804	full_calibration2.csv	5.77E-05	6.58E-06	0.25	17.33802287	1.979020586	2.39880773	-0.602059991	0.472546073	2.755079425	0.932581433	1.24856283	0.185078622	0.669037837	0.168257147	-0.047618703	0.202496593	1.545290105	0.139849365	4105.613003	759.8611968
1799	18.05378451	32	139.5	424.4590067	93	-6.452220926	44.25291054	MAGPHPVIVITGLHEE	Kd	17338.02287	1979.020586	8.760910821	0.000122496	HPVIVITGLH	14	full	9799.832804	full_calibration2.csv	5.77E-05	6.58E-06	0.032	17.33802287	1.979020586	2.144574208	-1.494850022	0.472546073	2.755079425	0.932581433	1.24856283	0.185078622	0.669037837	0.168257147	-0.047618703	0.202496593	1.545290105	0.139849365	4105.613003	759.8611968
1800	274.6894338	500	352	497.6106262	106	5.757119229	48.56182464	MAGPHPVIVITGLHEE	Kd	17338.02287	1979.020586	8.760910821	0.000122496	HPVIVITGLH	14	full	9799.832804	full_calibration2.csv	5.77E-05	6.58E-06	0.5	17.33802287	1.979020586	2.546542663	-0.301029996	0.472546073	2.755079425	0.932581433	1.24856283	0.185078622	0.669037837	0.168257147	-0.047618703	0.202496593	1.545290105	0.139849365	4105.613003	759.8611968
1801	35.48006754	63	158	43.11413483	75	-3.881824865	5.011916371	MAGPHPVIVITGLHEE	Kd	17338.02287	1979.020586	8.760910821	0.000122496	HPVIVITGLH	14	full	9799.832804	full_calibration2.csv	5.77E-05	6.58E-06	0.063	17.33802287	1.979020586	2.198657087	-1.200659451	0.472546073	2.755079425	0.932581433	1.24856283	0.185078622	0.669037837	0.168257147	-0.047618703	0.202496593	1.545290105	0.139849365	4105.613003	759.8611968
1802	1419.915997	1000	1647	484.955576	99	0.319948033	48.98791091	MAGPHPVIVITMPHEE	Kd	5901.698989	457.7236945	12.89358419	1.34E-05	HPVIVITMPH	15	full	9799.832804	full_calibration2.csv	0.000169443	1.31E-05	1	5.901698989	0.457723695	3.216693599	0	0.674361496	3.163666002	0.989962882	0.60950946	0.165047328	0.029984467	0.145934889	-0.686672074	0.184367553	0.906236734	0.112001648	1397.511832	230.6555939
1803	203.2587164	125	329.5	701.0111108	84	6.398797426	76.94596582	MAGPHPVIVITMPHEE	Kd	5901.698989	457.7236945	12.89358419	1.34E-05	HPVIVITMPH	15	full	9799.832804	full_calibration2.csv	0.000169443	1.31E-05	0.125	5.901698989	0.457723695	2.517855419	-0.903089987	0.674361496	3.163666002	0.989962882	0.60950946	0.165047328	0.029984467	0.145934889	-0.686672074	0.184367553	0.906236734	0.112001648	1397.511832	230.6555939
1804	2480.436883	2000	2226	1205.4172	74	0.605556352	141.0834119	MAGPHPVIVITMPHEE	Kd	5901.698989	457.7236945	12.89358419	1.34E-05	HPVIVITMPH	15	full	9799.832804	full_calibration2.csv	0.000169443	1.31E-05	2	5.901698989	0.457723695	3.34752516	0.301029996	0.674361496	3.163666002	0.989962882	0.60950946	0.165047328	0.029984467	0.145934889	-0.686672074	0.184367553	0.906236734	0.112001648	1397.511832	230.6555939
1805	398.2571653	250	581.75	405.1580552	78	0.973352685	46.17204553	MAGPHPVIVITMPHEE	Kd	5901.698989	457.7236945	12.89358419	1.34E-05	HPVIVITMPH	15	full	9799.832804	full_calibration2.csv	0.000169443	1.31E-05	0.25	5.901698989	0.457723695	2.764736392	-0.602059991	0.674361496	3.163666002	0.989962882	0.60950946	0.165047328	0.029984467	0.145934889	-0.686672074	0.184367553	0.906236734	0.112001648	1397.511832	230.6555939
1806	52.84977386	32	162	42.55487004	73	-3.992937677	5.015139529	MAGPHPVIVITMPHEE	Kd	5901.698989	457.7236945	12.89358419	1.34E-05	HPVIVITMPH	15	full	9799.832804	full_calibration2.csv	0.000169443	1.31E-05	0.032	5.901698989	0.457723695	2.209515015	-1.494850022	0.674361496	3.163666002	0.989962882	0.60950946	0.165047328	0.029984467	0.145934889	-0.686672074	0.184367553	0.906236734	0.112001648	1397.511832	230.6555939
1807	765.408747	500	885	412.1343734	65	0.532801652	51.51679668	MAGPHPVIVITMPHEE	Kd	5901.698989	457.7236945	12.89358419	1.34E-05	HPVIVITMPH	15	full	9799.832804	full_calibration2.csv	0.000169443	1.31E-05	0.5	5.901698989	0.457723695	2.946943271	-0.301029996	0.674361496	3.163666002	0.989962882	0.60950946	0.165047328	0.029984467	0.145934889	-0.686672074	0.184367553	0.906236734	0.112001648	1397.511832	230.6555939
1808	103.5072294	63	204	87.5644386	74	2.315443436	10.24864235	MAGPHPVIVITMPHEE	Kd	5901.698989	457.7236945	12.89358419	1.34E-05	HPVIVITMPH	15	full	9799.832804	full_calibration2.csv	0.000169443	1.31E-05	0.063	5.901698989	0.457723695	2.309630167	-1.200659451	0.674361496	3.163666002	0.989962882	0.60950946	0.165047328	0.029984467	0.145934889	-0.686672074	0.184367553	0.906236734	0.112001648	1397.511832	230.6555939
1809	1349.417384	1000	1439.5	546.9742639	105	0.42634027	53.63523933	MAGPHPVIVITMPHEE	Kd	6262.26957	503.3827528	12.44037372	1.65E-05	HPVIVITMPH	16	full	9799.832804	full_calibration2.csv	0.000159687	1.28E-05	1	6.26226957	0.503382753	3.158211669	0	0.645848946	3.152694083	0.996897189	0.60950946	0.165047328	0.029984467	0.145934889	-0.686672074	0.184367553	0.906236734	0.112001648	1397.511832	230.6555939
1810	191.7844686	125	370	307.6912938	99	1.543758265	31.08151433	MAGPHPVIVITMPHEE	Kd	6262.26957	503.3827528	12.44037372	1.65E-05	HPVIVITMPH	16	full	9799.832804	full_calibration2.csv	0.000159687	1.28E-05	0.125	6.26226957	0.503382753	2.568201724	-0.903089987	0.645848946	3.152694083	0.996897189	0.60950946	0.165047328	0.029984467	0.145934889	-0.686672074	0.184367553	0.906236734	0.112001648	1397.511832	230.6555939
1811	2372.189075	2000	2165	721.3265005	97	0.362147308	73.62007768	MAGPHPVIVITMPHEE	Kd	6262.26957	503.3827528	12.44037372	1.65E-05	HPVIVITMPH	16	full	9799.832804	full_calibration2.csv	0.000159687	1.28E-05	2	6.26226957	0.503382753	3.335457901	0.301029996	0.645848946	3.152694083	0.996897189	0.60950946	0.165047328	0.029984467	0.145934889	-0.686672074	0.184367553	0.906236734	0.112001648	1397.511832	230.6555939
1812	376.2065091	250	605.5	256.6206072	111	0.589377048	24.46781486	MAGPHPVIVITMPHEE	Kd	6262.26957	503.3827528	12.44037372	1.65E-05	HPVIVITMPH	16	full	9799.832804	full_calibration2.csv	0.000159687	1.28E-05	0.25	6.26226957	0.503382753	2.782114147	-0.602059991	0.645848946	3.152694083	0.996897189	0.60950946	0.165047328	0.029984467	0.145934889	-0.686672074	0.184367553	0.906236734	0.112001648	1397.511832	230.6555939
1813	49.82224645	32	162	33.71045265	101	-4.881370205	3.371045265	MAGPHPVIVITMPHEE	Kd	6262.26957	503.3827528	12.44037372	1.65E-05	HPVIVITMPH	16	full	9799.832804	full_calibration2.csv	0.000159687	1.28E-05	0.032	6.26226957	0.503382753	2.209515015	-1.494850022	0.645848946	3.152694083	0.996897189	0.60950946	0.165047328	0.029984467	0.145934889	-0.686672074	0.184367553	0.906236734	0.112001648	1397.511832	230.6555939
1814	724.5964319	500	924.5	1049.233487	88	1.547632803	112.4896373	MAGPHPVIVITMPHEE	Kd	6262.26957	503.3827528	12.44037372	1.65E-05	HPVIVITMPH	16	full	9799.832804	full_calibration2.csv	0.000159687	1.28E-05	0.5	6.26226957	0.503382753	2.965906915	-0.301029996	0.645848946	3.152694083	0.996897189	0.60950946	0.165047328	0.029984467	0.145934889	-0.686672074	0.184367553	0.906236734	0.112001648	1397.511832	230.6555939
1815	97.6068229	63	217	414.2249649	108	-103.1979151	40.04463883	MAGPHPVIVITMPHEE	Kd	6262.26957	503.3827528	12.44037372	1.65E-05	HPVIVITMPH	16	full	9799.832804	full_calibration2.csv	0.000159687	1.28E-05	0.063	6.26226957	0.503382753	2.336459734	-1.200659451	0.645848946	3.152694083	0.996897189	0.60950946	0.165047328	0.029984467	0.145934889	-0.686672074	0.184367553	0.906236734	0.112001648	1397.511832	230.6555939
1816	1482.418879	1000	1837	1343.141324	94	0.710025332	139.2772672	MAGPHPKIVITGPHEE	Kd	5610.704265	693.5918843	8.089345323	0.000191294	HPKIVITGPH	17	full	9799.832804	full_calibration2.csv	0.000178231	2.20E-05	1	5.610704265	0.693591884	3.264109156	0	0.634802382	3.205480927	0.987725829	0.579524993	0.191068417	0	0.174824229	-0.71665654	0.20798537	0.876252268	0.147685099	1328.604799	253.8544158
1817	213.5708265	125	421	186.7385152	81	0.626938003	20.8780007	MAGPHPKIVITGPHEE	Kd	5610.704265	693.5918843	8.089345323	0.000191294	HPKIVITGPH	17	full	9799.832804	full_calibration2.csv	0.000178231	2.20E-05	0.125	5.610704265	0.693591884	2.624282096	-0.903089987	0.634802382	3.205480927	0.987725829	0.579524993	0.191068417	0	0.174824229	-0.71665654	0.20798537	0.876252268	0.147685099	1328.604799	253.8544158
1818	2575.276206	2000	2149	1778.828431	70	0.670572787	214.1457782	MAGPHPKIVITGPHEE	Kd	5610.704265	693.5918843	8.089345323	0.000191294	HPKIVITGPH	17	full	9799.832804	full_calibration2.csv	0.000178231	2.20E-05	2	5.610704265	0.693591884	3.332236415	0.301029996	0.634802382	3.205480927	0.987725829	0.579524993	0.191068417	0	0.174824229	-0.71665654	0.20798537	0.876252268	0.147685099	1328.604799	253.8544158
1819	418.0313645	250	742	760.5742545	99	1.387960391	76.82960185	MAGPHPKIVITGPHEE	Kd	5610.704265	693.5918843	8.089345323	0.000191294	HPKIVITGPH	17	full	9799.832804	full_calibration2.csv	0.000178231	2.20E-05	0.25	5.610704265	0.693591884	2.870403905	-0.602059991	0.634802382	3.205480927	0.987725829	0.579524993	0.191068417	0	0.174824229	-0.71665654	0.20798537	0.876252268	0.147685099	1328.604799	253.8544158
1820	55.57524105	32	177.25	59.71056842	86	3.906511133	6.476520472	MAGPHPKIVITGPHEE	Kd	5610.704265	693.5918843	8.089345323	0.000191294	HPKIVITGPH	17	full	9799.832804	full_calibration2.csv	0.000178231	2.20E-05	0.032	5.610704265	0.693591884	2.248586244	-1.494850022	0.634802382	3.205480927	0.987725829	0.579524993	0.191068417	0	0.174824229	-0.71665654	0.20798537	0.876252268	0.147685099	1328.604799	253.8544158
1821	801.8578856	500	1028.5	609.8272821	93	0.639087887	63.5788892	MAGPHPKIVITGPHEE	Kd	5610.704265	693.5918843	8.089345323	0.000191294	HPKIVITGPH	17	full	9799.832804	full_calibration2.csv	0.000178231	2.20E-05	0.5	5.610704265	0.693591884	3.012204296	-0.301029996	0.634802382	3.205480927	0.987725829	0.579524993	0.191068417	0	0.174824229	-0.71665654	0.20798537	0.876252268	0.147685099	1328.604799	253.8544158
1822	108.8159407	63	263	89.82568961	96	0.851764738	9.2159213	MAGPHPKIVITGPHEE	Kd	5610.704265	693.5918843	8.089345323	0.000191294	HPKIVITGPH	17	full	9799.832804	full_calibration2.csv	0.000178231	2.20E-05	0.063	5.610704265	0.693591884	2.419955748	-1.200659451	0.634802382	3.205480927	0.987725829	0.579524993	0.191068417	0	0.174824229	-0.71665654	0.20798537	0.876252268	0.147685099	1328.604799	253.8544158
1823	1639.860779	1000	1845.5	957.1521946	89	0.508219877	102.0327668	MAGPHPKIVITGPHEE	Kd	4976.015117	455.3571064	10.92772035	3.49E-05	HPKIVITGPH	18	full	9799.832804	full_calibration2.csv	0.000200964	1.84E-05	1	4.976015117	0.455357106	3.26611405	0	0.662604336	3.238192838	0.994526052	0.579524993	0.191068417	0	0.174824229	-0.71665654	0.20798537	0.876252268	0.147685099	1328.604799	253.8544158
1824	240.1441816	125	438.25	470.3793934	98	1.985535311	47.75979133	MAGPHPKIVITGPHEE	Kd	4976.015117	455.3571064	10.92772035	3.49E-05	HPKIVITGPH	18	full	9799.832804	full_calibration2.csv	0.000200964	1.84E-05	0.125	4.976015117	0.455357106	2.641721925	-0.903089987	0.662604336	3.238192838	0.994526052	0.579524993	0.191068417	0	0.174824229	-0.71665654	0.20798537	0.876252268	0.147685099	1328.604799	253.8544158
1825	2809.579005	2000	2489	2198.490249	86	0.749815734	238.4597481	MAGPHPKIVITGPHEE	Kd	4976.015117	455.3571064	10.92772035	3.49E-05	HPKIVITGPH	18	full	9799.832804	full_calibration2.csv	0.000200964	1.84E-05	2	4.976015117	0.455357106	3.396024897	0.301029996	0.662604336	3.238192838	0.994526052	0.579524993	0.191068417	0	0.174824229	-0.71665654	0.20798537	0.876252268	0.147685099	1328.604799	253.8544158
1826	468.8004428	250	765	524.652104	97	0.876219283	53.54708114	MAGPHPKIVITGPHEE	Kd	4976.015117	455.3571064	10.92772035	3.49E-05	HPKIVITGPH	18	full	9799.832804	full_calibration2.csv	0.000200964	1.84E-05	0.25	4.976015117	0.455357106	2.883661435	-0.602059991	0.662604336	3.238192838	0.994526052	0.579524993	0.191068417	0	0.174824229	-0.71665654	0.20798537	0.876252268	0.147685099	1328.604799	253.8544158
1827	62.61855095	32	173	41.06270235	73	6.971109934	4.839285881	MAGPHPKIVITGPHEE	Kd	4976.015117	455.3571064	10.92772035	3.49E-05	HPKIVITGPH	18	full	9799.832804	full_calibration2.csv	0.000200964	1.84E-05	0.032	4.976015117	0.455357106	2.238046103	-1.494850022	0.662604336	3.238192838	0.994526052	0.579524993	0.191068417	0	0.174824229	-0.71665654	0.20798537	0.876252268	0.147685099	1328.604799	253.8544158
1828	894.7959963	500	1090.5	575.8590649	107	0.565598993	55.93237684	MAGPHPKIVITGPHEE	Kd	4976.015117	455.3571064	10.92772035	3.49E-05	HPKIVITGPH	18	full	9799.832804	full_calibration2.csv	0.000200964	1.84E-05	0.5	4.976015117	0.455357106	3.03762567	-0.301029996	0.662604336	3.238192838	0.994526052	0.579524993	0.191068417	0	0.174824229	-0.71665654	0.20798537	0.876252268	0.147685099	1328.604799	253.8544158
1829	122.5218525	63	263.5	183.7129425	94	2.320324702	19.05014471	MAGPHPKIVITGPHEE	Kd	4976.015117	455.3571064	10.92772035	3.49E-05	HPKIVITGPH	18	full	9799.832804	full_calibration2.csv	0.000200964	1.84E-05	0.063	4.976015117	0.455357106	2.42078062	-1.200659451	0.662604336	3.238192838	0.994526052	0.579524993	0.191068417	0	0.174824229	-0.71665654	0.20798537	0.876252268	0.147685099	1328.604799	253.8544158
1830	3909.27137	1000	3930	1317.593124	104	0.343117195	129.8263082	MAGPHPKIIITGPHEE	Kd	1506.818247	131.7096814	11.44045169	2.68E-05	HPKIIITGPH	19	full	9799.832804	full_calibration2.csv	0.00066365	5.80E-05	1	1.506818247	0.131709681	3.59439255	0	0.6702126	3.58936058	0.96647646	-0.200077841	0.16989921	-0.779602834	0.151400504	-1.496259374	0.188723384	0.096649434	0.119035667	356.811883	60.62205698
1831	750.6835412	125	1035.25	517.5760986	86	0.575181161	56.13901001	MAGPHPKIIITGPHEE	Kd	1506.818247	131.7096814	11.44045169	2.68E-05	HPKIIITGPH	19	full	9799.832804	full_calibration2.csv	0.00066365	5.80E-05	0.125	1.506818247	0.131709681	3.015045239	-0.903089987	0.6702126	3.58936058	0.96647646	-0.200077841	0.16989921	-0.779602834	0.151400504	-1.496259374	0.188723384	0.096649434	0.119035667	356.811883	60.62205698
1832	5589.01666	2000	5035	1816.891576	70	0.356043813	218.7280424	MAGPHPKIIITGPHEE	Kd	1506.818247	131.7096814	11.44045169	2.68E-05	HPKIIITGPH	19	full	9799.832804	full_calibration2.csv	0.00066365	5.80E-05	2	1.506818247	0.131709681	3.701999475	0.301029996	0.6702126	3.58936058	0.96647646	-0.200077841	0.16989921	-0.779602834	0.151400504	-1.496259374	0.188723384	0.096649434	0.119035667	356.811883	60.62205698
1833	1394.542779	250	1904.5	619.9041235	91	0.354387815	65.34363204	MAGPHPKIIITGPHEE	Kd	1506.818247	131.7096814	11.44045169	2.68E-05	HPKIIITGPH	19	full	9799.832804	full_calibration2.csv	0.00066365	5.80E-05	0.25	1.506818247	0.131709681	3.279780977	-0.602059991	0.6702126	3.58936058	0.96647646	-0.200077841	0.16989921	-0.779602834	0.151400504	-1.496259374	0.188723384	0.096649434	0.119035667	356.811883	60.62205698
1834	203.7892716	32	299.75	74.42486347	64	0.567925511	9.376651434	MAGPHPKIIITGPHEE	Kd	1506.818247	131.7096814	11.44045169	2.68E-05	HPKIIITGPH	19	full	9799.832804	full_calibration2.csv	0.00066365	5.80E-05	0.032	1.506818247	0.131709681	2.476759192	-1.494850022	0.6702126	3.58936058	0.96647646	-0.200077841	0.16989921	-0.779602834	0.151400504	-1.496259374	0.188723384	0.096649434	0.119035667	356.811883	60.62205698
1835	2441.634368	500	2634.5	1077.133012	103	0.459521074	106.6520605	MAGPHPKIIITGPHEE	Kd	1506.818247	131.7096814	11.44045169	2.68E-05	HPKIIITGPH	19	full	9799.832804	full_calibration2.csv	0.00066365	5.80E-05	0.5	1.506818247	0.131709681	3.420698203	-0.301029996	0.6702126	3.58936058	0.96647646	-0.200077841	0.16989921	-0.779602834	0.151400504	-1.496259374	0.188723384	0.096649434	0.119035667	356.811883	60.62205698
1836	393.2872278	63	663	289.7087703	95	0.641090441	29.88117809	MAGPHPKIIITGPHEE	Kd	1506.818247	131.7096814	11.44045169	2.68E-05	HPKIIITGPH	19	full	9799.832804	full_calibration2.csv	0.00066365	5.80E-05	0.063	1.506818247	0.131709681	2.821513528	-1.200659451	0.6702126	3.58936058	0.96647646	-0.200077841	0.16989921	-0.779602834	0.151400504	-1.496259374	0.188723384	0.096649434	0.119035667	356.811883	60.62205698
1837	3498.398079	1000	3656.5	1095.387045	83	0.308969208	120.965263	MAGPHPKIIITGPHEE	Kd	1801.234332	205.0181779	8.78572988	0.000120564	HPKIIITGPH	20	full	9799.832804	full_calibration2.csv	0.000555175	6.32E-05	1	1.801234332	0.205018178	3.563065578	0	0.650007138	3.547649519	0.964427189	-0.200077841	0.16989921	-0.779602834	0.151400504	-1.496259374	0.188723384	0.096649434	0.119035667	356.811883	60.62205698
1838	635.9450044	125	1121.75	454.4757824	84	0.456920853	49.88519794	MAGPHPKIIITGPHEE	Kd	1801.234332	205.0181779	8.78572988	0.000120564	HPKIIITGPH	20	full	9799.832804	full_calibration2.csv	0.000555175	6.32E-05	0.125	1.801234332	0.205018178	3.049896078	-0.903089987	0.650007138	3.547649519	0.964427189	-0.200077841	0.16989921	-0.779602834	0.151400504	-1.496259374	0.188723384	0.096649434	0.119035667	356.811883	60.62205698
1839	5156.131903	2000	4431	1890.673435	65	0.449726265	236.3341794	MAGPHPKIIITGPHEE	Kd	1801.234332	205.0181779	8.78572988	0.000120564	HPKIIITGPH	20	full	9799.832804	full_calibration2.csv	0.000555175	6.32E-05	2	1.801234332	0.205018178	3.64650175	0.301029996	0.650007138	3.547649519	0.964427189	-0.200077841	0.16989921	-0.779602834	0.151400504	-1.496259374	0.188723384	0.096649434	0.119035667	356.811883	60.62205698
1840	1194.382408	250	1694	883.7533236	81	0.590795393	98.80662534	MAGPHPKIIITGPHEE	Kd	1801.234332	205.0181779	8.78572988	0.000120564	HPKIIITGPH	20	full	9799.832804	full_calibration2.csv	0.000555175	6.32E-05	0.25	1.801234332	0.205018178	3.228913406	-0.602059991	0.650007138	3.547649519	0.964427189	-0.200077841	0.16989921	-0.779602834	0.151400504	-1.496259374	0.188723384	0.096649434	0.119035667	356.811883	60.62205698
1841	171.0608646	32	308	84.65890455	69	0.595824604	10.26640017	MAGPHPKIIITGPHEE	Kd	1801.234332	205.0181779	8.78572988	0.000120564	HPKIIITGPH	20	full	9799.832804	full_calibration2.csv	0.000555175	6.32E-05	0.032	1.801234332	0.205018178	2.488550717	-1.494850022	0.650007138	3.547649519	0.964427189	-0.200077841	0.16989921	-0.779602834	0.151400504	-1.496259374	0.188723384	0.096649434	0.119035667	356.811883	60.62205698
1842	2129.255737	500	2435.5	1149.536118	82	0.502139946	127.7262354	MAGPHPKIIITGPHEE	Kd	1801.234332	205.0181779	8.78572988	0.000120564	HPKIIITGPH	20	full	9799.832804	full_calibration2.csv	0.000555175	6.32E-05	0.5	1.801234332	0.205018178	3.386588134	-0.301029996	0.650007138	3.547649519	0.964427189	-0.200077841	0.16989921	-0.779602834	0.151400504	-1.496259374	0.188723384	0.096649434	0.119035667	356.811883	60.62205698
1843	331.1758915	63	549	250.6426204	87	0.622208183	27.02748884	MAGPHPKIIITGPHEE	Kd	1801.234332	205.0181779	8.78572988	0.000120564	HPKIIITGPH	20	full	9799.832804	full_calibration2.csv	0.000555175	6.32E-05	0.063	1.801234332	0.205018178	2.739572344	-1.200659451	0.650007138	3.547649519	0.964427189	-0.200077841	0.16989921	-0.779602834	0.151400504	-1.496259374	0.188723384	0.096649434	0.119035667	356.811883	60.62205698
1844	744.3440926	1000	902	430.7116359	74	0.587611974	50.41098398	MAGPHPKIVLTGPHEE	Kd	12165.72927	1273.911409	9.549902121	7.53E-05	HPKIVLTGPH	21	full	9799.832804	full_calibration2.csv	8.22E-05	8.61E-06	1	12.16572927	1.273911409	2.955206538	0	0.553768737	2.903240717	0.972858445	1.038475371	0.179416334	0.458950377	0.162008	-0.257706163	0.197334728	1.335202645	0.13226477	2880.823071	516.8667139
1845	99.66691756	125	211.25	620.036637	80	-55.14500385	69.75957184	MAGPHPKIVLTGPHEE	Kd	12165.72927	1273.911409	9.549902121	7.53E-05	HPKIVLTGPH	21	full	9799.832804	full_calibration2.csv	8.22E-05	8.61E-06	0.125	12.16572927	1.273911409	2.324796718	-0.903089987	0.553768737	2.903240717	0.972858445	1.038475371	0.179416334	0.458950377	0.162008	-0.257706163	0.197334728	1.335202645	0.13226477	2880.823071	516.8667139
1846	1383.597359	2000	1208.25	907.527239	68	0.740039	110.8720985	MAGPHPKIVLTGPHEE	Kd	12165.72927	1273.911409	9.549902121	7.53E-05	HPKIVLTGPH	21	full	9799.832804	full_calibration2.csv	8.22E-05	8.61E-06	2	12.16572927	1.273911409	3.082156804	0.301029996	0.553768737	2.903240717	0.972858445	1.038475371	0.179416334	0.458950377	0.162008	-0.257706163	0.197334728	1.335202645	0.13226477	2880.823071	516.8667139
1847	197.3269671	250	347	722.9926109	85	4.597813252	78.8849611	MAGPHPKIVLTGPHEE	Kd	12165.72927	1273.911409	9.549902121	7.53E-05	HPKIVLTGPH	21	full	9799.832804	full_calibration2.csv	8.22E-05	8.61E-06	0.25	12.16572927	1.273911409	2.540329475	-0.602059991	0.553768737	2.903240717	0.972858445	1.038475371	0.179416334	0.458950377	0.162008	-0.257706163	0.197334728	1.335202645	0.13226477	2880.823071	516.8667139
1848	25.70926464	32	144.5	60.22353143	101	-2.230910205	6.022353143	MAGPHPKIVLTGPHEE	Kd	12165.72927	1273.911409	9.549902121	7.53E-05	HPKIVLTGPH	21	full	9799.832804	full_calibration2.csv	8.22E-05	8.61E-06	0.032	12.16572927	1.273911409	2.159867847	-1.494850022	0.553768737	2.903240717	0.972858445	1.038475371	0.179416334	0.458950377	0.162008	-0.257706163	0.197334728	1.335202645	0.13226477	2880.823071	516.8667139
1849	386.8641354	500	524.75	860.9106058	94	1.708715004	89.27227117	MAGPHPKIVLTGPHEE	Kd	12165.72927	1273.911409	9.549902121	7.53E-05	HPKIVLTGPH	21	full	9799.832804	full_calibration2.csv	8.22E-05	8.61E-06	0.5	12.16572927	1.273911409	2.719952447	-0.301029996	0.553768737	2.903240717	0.972858445	1.038475371	0.179416334	0.458950377	0.162008	-0.257706163	0.197334728	1.335202645	0.13226477	2880.823071	516.8667139
1850	50.48680474	63	163.75	200.9415845	72	-11.4144332	23.84737869	MAGPHPKIVLTGPHEE	Kd	12165.72927	1273.911409	9.549902121	7.53E-05	HPKIVLTGPH	21	full	9799.832804	full_calibration2.csv	8.22E-05	8.61E-06	0.063	12.16572927	1.273911409	2.214181309	-1.200659451	0.553768737	2.903240717	0.972858445	1.038475371	0.179416334	0.458950377	0.162008	-0.257706163	0.197334728	1.335202645	0.13226477	2880.823071	516.8667139
1851	688.073561	1000	825.5	1223.048644	94	1.597290382	126.8242364	MAGPHPKIVLTGPHEE	Kd	13242.42023	1578.23732	8.390639392	0.000156027	HPKIVLTGPH	22	full	9799.832804	full_calibration2.csv	7.55E-05	9.00E-06	1	13.24242023	1.57823732	2.916717078	0	0.530735889	2.883016659	0.980541355	1.038475371	0.179416334	0.458950377	0.162008	-0.257706163	0.197334728	1.335202645	0.13226477	2880.823071	516.8667139
1852	91.63915547	125	216.75	72.74263519	86	1.164207058	7.890046578	MAGPHPKIVLTGPHEE	Kd	13242.42023	1578.23732	8.390639392	0.000156027	HPKIVLTGPH	22	full	9799.832804	full_calibration2.csv	7.55E-05	9.00E-06	0.125	13.24242023	1.57823732	2.335959106	-0.903089987	0.530735889	2.883016659	0.980541355	1.038475371	0.179416334	0.458950377	0.162008	-0.257706163	0.197334728	1.335202645	0.13226477	2880.823071	516.8667139
1853	1285.863092	2000	1112.5	918.7184577	86	0.885948659	99.64900782	MAGPHPKIVLTGPHEE	Kd	13242.42023	1578.23732	8.390639392	0.000156027	HPKIVLTGPH	22	full	9799.832804	full_calibration2.csv	7.55E-05	9.00E-06	2	13.24242023	1.57823732	3.04630002	0.301029996	0.530735889	2.883016659	0.980541355	1.038475371	0.179416334	0.458950377	0.162008	-0.257706163	0.197334728	1.335202645	0.13226477	2880.823071	516.8667139
1854	181.5803362	250	385.25	1472.29101	82	-40.10892451	163.5878899	MAGPHPKIVLTGPHEE	Kd	13242.42023	1578.23732	8.390639392	0.000156027	HPKIVLTGPH	22	full	9799.832804	full_calibration2.csv	7.55E-05	9.00E-06	0.25	13.24242023	1.57823732	2.585742647	-0.602059991	0.530735889	2.883016659	0.980541355	1.038475371	0.179416334	0.458950377	0.162008	-0.257706163	0.197334728	1.335202645	0.13226477	2880.823071	516.8667139
1855	23.62398088	32	142	901.6870643	93	-8.067041556	94.00737494	MAGPHPKIVLTGPHEE	Kd	13242.42023	1578.23732	8.390639392	0.000156027	HPKIVLTGPH	22	full	9799.832804	full_calibration2.csv	7.55E-05	9.00E-06	0.032	13.24242023	1.57823732	2.152288344	-1.494850022	0.530735889	2.883016659	0.980541355	1.038475371	0.179416334	0.458950377	0.162008	-0.257706163	0.197334728	1.335202645	0.13226477	2880.823071	516.8667139
1856	356.5541091	500	501.75	255.2595594	104	0.7203678	25.15147174	MAGPHPKIVLTGPHEE	Kd	13242.42023	1578.23732	8.390639392	0.000156027	HPKIVLTGPH	22	full	9799.832804	full_calibration2.csv	7.55E-05	9.00E-06	0.5	13.24242023	1.57823732	2.700487381	-0.301029996	0.530735889	2.883016659	0.980541355	1.038475371	0.179416334	0.458950377	0.162008	-0.257706163	0.197334728	1.335202645	0.13226477	2880.823071	516.8667139
1857	46.40135043	63	163.75	264.8009838	94	-11.008975	27.45858289	MAGPHPKIVLTGPHEE	Kd	13242.42023	1578.23732	8.390639392	0.000156027	HPKIVLTGPH	22	full	9799.832804	full_calibration2.csv	7.55E-05	9.00E-06	0.063	13.24242023	1.57823732	2.214181309	-1.200659451	0.530735889	2.883016659	0.980541355	1.038475371	0.179416334	0.458950377	0.162008	-0.257706163	0.197334728	1.335202645	0.13226477	2880.823071	516.8667139
1858	632.6121272	1000	722	280.2979318	96	0.463845436	28.75796101	MAGPHPKIVIQGPHEE	Kd	14491.06061	1434.210369	10.10385988	5.46E-05	HPKIVIQGPH	23	full	9799.832804	full_calibration2.csv	6.90E-05	6.83E-06	1	14.49106061	1.434210369	2.858537198	0	0.518392103	2.829590903	0.968838445	1.142196424	0.176127387	0.56267143	0.15835791	-0.15398511	0.194349249	1.438923698	0.127767778	3431.4574	604.3736255
1859	83.8104831	125	198.25	92.04147672	96	2.823448399	9.443256261	MAGPHPKIVIQGPHEE	Kd	14491.06061	1434.210369	10.10385988	5.46E-05	HPKIVIQGPH	23	full	9799.832804	full_calibration2.csv	6.90E-05	6.83E-06	0.125	14.49106061	1.434210369	2.297213196	-0.903089987	0.518392103	2.829590903	0.968838445	1.142196424	0.176127387	0.56267143	0.15835791	-0.15398511	0.194349249	1.438923698	0.127767778	3431.4574	604.3736255
1860	1188.50243	2000	1065.5	577.4076326	64	0.586386679	72.74652386	MAGPHPKIVIQGPHEE	Kd	14491.06061	1434.210369	10.10385988	5.46E-05	HPKIVIQGPH	23	full	9799.832804	full_calibration2.csv	6.90E-05	6.83E-06	2	14.49106061	1.434210369	3.027553454	0.301029996	0.518392103	2.829590903	0.968838445	1.142196424	0.176127387	0.56267143	0.15835791	-0.15398511	0.194349249	1.438923698	0.127767778	3431.4574	604.3736255
1861	166.1995881	250	287.5	823.8076752	84	16.33227395	90.42463984	MAGPHPKIVIQGPHEE	Kd	14491.06061	1434.210369	10.10385988	5.46E-05	HPKIVIQGPH	23	full	9799.832804	full_calibration2.csv	6.90E-05	6.83E-06	0.25	14.49106061	1.434210369	2.458637849	-0.602059991	0.518392103	2.829590903	0.968838445	1.142196424	0.176127387	0.56267143	0.15835791	-0.15398511	0.194349249	1.438923698	0.127767778	3431.4574	604.3736255
1862	21.5928762	32	138	111.5088386	84	-2.93996938	12.23968515	MAGPHPKIVIQGPHEE	Kd	14491.06061	1434.210369	10.10385988	5.46E-05	HPKIVIQGPH	23	full	9799.832804	full_calibration2.csv	6.90E-05	6.83E-06	0.032	14.49106061	1.434210369	2.139879086	-1.494850022	0.518392103	2.829590903	0.968838445	1.142196424	0.176127387	0.56267143	0.15835791	-0.15398511	0.194349249	1.438923698	0.127767778	3431.4574	604.3736255
1863	326.8558863	500	450	261.3228652	69	0.78675645	31.69005223	MAGPHPKIVIQGPHEE	Kd	14491.06061	1434.210369	10.10385988	5.46E-05	HPKIVIQGPH	23	full	9799.832804	full_calibration2.csv	6.90E-05	6.83E-06	0.5	14.49106061	1.434210369	2.653212514	-0.301029996	0.518392103	2.829590903	0.968838445	1.142196424	0.176127387	0.56267143	0.15835791	-0.15398511	0.194349249	1.438923698	0.127767778	3431.4574	604.3736255
1864	42.42042708	63	156.5	71.89800343	92	-4.286854385	7.536958678	MAGPHPKIVIQGPHEE	Kd	14491.06061	1434.210369	10.10385988	5.46E-05	HPKIVIQGPH	23	full	9799.832804	full_calibration2.csv	6.90E-05	6.83E-06	0.063	14.49106061	1.434210369	2.194514342	-1.200659451	0.518392103	2.829590903	0.968838445	1.142196424	0.176127387	0.56267143	0.15835791	-0.15398511	0.194349249	1.438923698	0.127767778	3431.4574	604.3736255
1865	664.1729927	1000	785	463.0637487	77	0.670949027	53.11705487	MAGPHPKIVIQGPHEE	Kd	13754.94022	1430.860213	9.613056603	7.25E-05	HPKIVIQGPH	24	full	9799.832804	full_calibration2.csv	7.27E-05	7.56E-06	1	13.75494022	1.430860213	2.894869657	0	0.533024103	2.854584543	0.970301853	1.142196424	0.176127387	0.56267143	0.15835791	-0.15398511	0.194349249	1.438923698	0.127767778	3431.4574	604.3736255
1866	88.25535852	125	199	80.73678684	80	2.086221882	9.083598204	MAGPHPKIVIQGPHEE	Kd	13754.94022	1430.860213	9.613056603	7.25E-05	HPKIVIQGPH	24	full	9799.832804	full_calibration2.csv	7.27E-05	7.56E-06	0.125	13.75494022	1.430860213	2.298853076	-0.903089987	0.533024103	2.854584543	0.970301853	1.142196424	0.176127387	0.56267143	0.15835791	-0.15398511	0.194349249	1.438923698	0.127767778	3431.4574	604.3736255
1867	1244.033004	2000	1096.5	571.7841702	76	0.55452813	66.02394892	MAGPHPKIVIQGPHEE	Kd	13754.94022	1430.860213	9.613056603	7.25E-05	HPKIVIQGPH	24	full	9799.832804	full_calibration2.csv	7.27E-05	7.56E-06	2	13.75494022	1.430860213	3.040008636	0.301029996	0.533024103	2.854584543	0.970301853	1.142196424	0.176127387	0.56267143	0.15835791	-0.15398511	0.194349249	1.438923698	0.127767778	3431.4574	604.3736255
1868	174.9352844	250	309.5	561.9118671	71	7.897801162	67.16131395	MAGPHPKIVIQGPHEE	Kd	13754.94022	1430.860213	9.613056603	7.25E-05	HPKIVIQGPH	24	full	9799.832804	full_calibration2.csv	7.27E-05	7.56E-06	0.25	13.75494022	1.430860213	2.490660653	-0.602059991	0.533024103	2.854584543	0.970301853	1.142196424	0.176127387	0.56267143	0.15835791	-0.15398511	0.194349249	1.438923698	0.127767778	3431.4574	604.3736255
1869	22.74577569	32	140	18.6587917	57	-0.682419716	2.493385922	MAGPHPKIVIQGPHEE	Kd	13754.94022	1430.860213	9.613056603	7.25E-05	HPKIVIQGPH	24	full	9799.832804	full_calibration2.csv	7.27E-05	7.56E-06	0.032	13.75494022	1.430860213	2.146128036	-1.494850022	0.533024103	2.854584543	0.970301853	1.142196424	0.176127387	0.56267143	0.15835791	-0.15398511	0.194349249	1.438923698	0.127767778	3431.4574	604.3736255
1870	343.7346159	500	479.5	798.5979378	77	2.916388011	91.60546599	MAGPHPKIVIQGPHEE	Kd	13754.94022	1430.860213	9.613056603	7.25E-05	HPKIVIQGPH	24	full	9799.832804	full_calibration2.csv	7.27E-05	7.56E-06	0.5	13.75494022	1.430860213	2.680788612	-0.301029996	0.533024103	2.854584543	0.970301853	1.142196424	0.176127387	0.56267143	0.15835791	-0.15398511	0.194349249	1.438923698	0.127767778	3431.4574	604.3736255
1871	44.68028206	63	155.5	44.37026427	76	-4.793376097	5.123436804	MAGPHPKIVIQGPHEE	Kd	13754.94022	1430.860213	9.613056603	7.25E-05	HPKIVIQGPH	24	full	9799.832804	full_calibration2.csv	7.27E-05	7.56E-06	0.063	13.75494022	1.430860213	2.191730393	-1.200659451	0.533024103	2.854584543	0.970301853	1.142196424	0.176127387	0.56267143	0.15835791	-0.15398511	0.194349249	1.438923698	0.127767778	3431.4574	604.3736255
1872	8212.673687	1000	8091	2636.304469	72	0.314939571	312.8717789	MAGPIPKIVITGPHEE	Kd	193.2572969	23.52857874	8.213725914	0.000175723	IPKIVITGPH	25	full	9799.832804	full_calibration2.csv	0.005174449	0.000629976	1	0.193257297	0.023528579	3.908002201	0	0.346336378	3.887159146	0.935886829	-1.417941592	0.189862636	-1.997466586	0.173505596	-2.714123126	0.206878212	-1.121214318	0.146121761	45.76298446	8.688680854
1873	3849.021255	125	4332	1216.2549	87	0.289186809	131.1521388	MAGPIPKIVITGPHEE	Kd	193.2572969	23.52857874	8.213725914	0.000175723	IPKIVITGPH	25	full	9799.832804	full_calibration2.csv	0.005174449	0.000629976	0.125	0.193257297	0.023528579	3.636688448	-0.903089987	0.346336378	3.887159146	0.935886829	-1.417941592	0.189862636	-1.997466586	0.173505596	-2.714123126	0.206878212	-1.121214318	0.146121761	45.76298446	8.688680854
1874	8936.327551	2000	8362	5622.349463	79	0.547983559	636.6057174	MAGPIPKIVITGPHEE	Kd	193.2572969	23.52857874	8.213725914	0.000175723	IPKIVITGPH	25	full	9799.832804	full_calibration2.csv	0.005174449	0.000629976	2	0.193257297	0.023528579	3.922310163	0.301029996	0.346336378	3.887159146	0.935886829	-1.417941592	0.189862636	-1.997466586	0.173505596	-2.714123126	0.206878212	-1.121214318	0.146121761	45.76298446	8.688680854
1875	5527.169475	250	5155.25	2092.940198	66	0.427833124	259.597282	MAGPIPKIVITGPHEE	Kd	193.2572969	23.52857874	8.213725914	0.000175723	IPKIVITGPH	25	full	9799.832804	full_calibration2.csv	0.005174449	0.000629976	0.25	0.193257297	0.023528579	3.712249731	-0.602059991	0.346336378	3.887159146	0.935886829	-1.417941592	0.189862636	-1.997466586	0.173505596	-2.714123126	0.206878212	-1.121214318	0.146121761	45.76298446	8.688680854
1876	1392.162003	32	1950.5	584.0199415	71	0.339902746	69.80373425	MAGPIPKIVITGPHEE	Kd	193.2572969	23.52857874	8.213725914	0.000175723	IPKIVITGPH	25	full	9799.832804	full_calibration2.csv	0.005174449	0.000629976	0.032	0.193257297	0.023528579	3.290145955	-1.494850022	0.346336378	3.887159146	0.935886829	-1.417941592	0.189862636	-1.997466586	0.173505596	-2.714123126	0.206878212	-1.121214318	0.146121761	45.76298446	8.688680854
1877	7067.962247	500	6332	2543.686013	83	0.385604772	280.9031283	MAGPIPKIVITGPHEE	Kd	193.2572969	23.52857874	8.213725914	0.000175723	IPKIVITGPH	25	full	9799.832804	full_calibration2.csv	0.005174449	0.000629976	0.5	0.193257297	0.023528579	3.801540906	-0.301029996	0.346336378	3.887159146	0.935886829	-1.417941592	0.189862636	-1.997466586	0.173505596	-2.714123126	0.206878212	-1.121214318	0.146121761	45.76298446	8.688680854
1878	2409.256142	63	3050.25	804.0122784	88	0.270937193	86.19916418	MAGPIPKIVITGPHEE	Kd	193.2572969	23.52857874	8.213725914	0.000175723	IPKIVITGPH	25	full	9799.832804	full_calibration2.csv	0.005174449	0.000629976	0.063	0.193257297	0.023528579	3.484335436	-1.200659451	0.346336378	3.887159146	0.935886829	-1.417941592	0.189862636	-1.997466586	0.173505596	-2.714123126	0.206878212	-1.121214318	0.146121761	45.76298446	8.688680854
1879	8227.44843	1000	8097.75	2589.07794	76	0.309312748	298.9609691	MAGPIPKIVITGPHEE	Kd	191.1144613	18.84146138	10.14329289	5.34E-05	IPKIVITGPH	26	full	9799.832804	full_calibration2.csv	0.005232466	0.000515855	1	0.191114461	0.018841461	3.908364365	0	0.382578737	3.900696338	0.908854428	-1.417941592	0.189862636	-1.997466586	0.173505596	-2.714123126	0.206878212	-1.121214318	0.146121761	45.76298446	8.688680854
1880	3875.1125	125	4325	986.2340008	83	0.232594097	108.9113258	MAGPIPKIVITGPHEE	Kd	191.1144613	18.84146138	10.14329289	5.34E-05	IPKIVITGPH	26	full	9799.832804	full_calibration2.csv	0.005232466	0.000515855	0.125	0.191114461	0.018841461	3.635986112	-0.903089987	0.382578737	3.900696338	0.908854428	-1.417941592	0.189862636	-1.997466586	0.173505596	-2.714123126	0.206878212	-1.121214318	0.146121761	45.76298446	8.688680854
1881	8945.066976	2000	8685	3150.143973	71	0.349848464	376.51422	MAGPIPKIVITGPHEE	Kd	191.1144613	18.84146138	10.14329289	5.34E-05	IPKIVITGPH	26	full	9799.832804	full_calibration2.csv	0.005232466	0.000515855	2	0.191114461	0.018841461	3.938769823	0.301029996	0.382578737	3.900696338	0.908854428	-1.417941592	0.189862636	-1.997466586	0.173505596	-2.714123126	0.206878212	-1.121214318	0.146121761	45.76298446	8.688680854
1882	5554.019231	250	5475	2527.81473	67	0.46374746	311.152484	MAGPIPKIVITGPHEE	Kd	191.1144613	18.84146138	10.14329289	5.34E-05	IPKIVITGPH	26	full	9799.832804	full_calibration2.csv	0.005232466	0.000515855	0.25	0.191114461	0.018841461	3.738384124	-0.602059991	0.382578737	3.900696338	0.908854428	-1.417941592	0.189862636	-1.997466586	0.173505596	-2.714123126	0.206878212	-1.121214318	0.146121761	45.76298446	8.688680854
1883	1405.532604	32	1648.25	632.1947686	66	0.417388372	78.41411034	MAGPIPKIVITGPHEE	Kd	191.1144613	18.84146138	10.14329289	5.34E-05	IPKIVITGPH	26	full	9799.832804	full_calibration2.csv	0.005232466	0.000515855	0.032	0.191114461	0.018841461	3.217023084	-1.494850022	0.382578737	3.900696338	0.908854428	-1.417941592	0.189862636	-1.997466586	0.173505596	-2.714123126	0.206878212	-1.121214318	0.146121761	45.76298446	8.688680854
1884	7089.876824	500	6243.75	2873.13501	68	0.421022058	351.0093078	MAGPIPKIVITGPHEE	Kd	191.1144613	18.84146138	10.14329289	5.34E-05	IPKIVITGPH	26	full	9799.832804	full_calibration2.csv	0.005232466	0.000515855	0.5	0.191114461	0.018841461	3.795445506	-0.301029996	0.382578737	3.900696338	0.908854428	-1.417941592	0.189862636	-1.997466586	0.173505596	-2.714123126	0.206878212	-1.121214318	0.146121761	45.76298446	8.688680854
1885	2429.572341	63	2909.5	966.7677069	88	0.356077908	103.6483777	MAGPIPKIVITGPHEE	Kd	191.1144613	18.84146138	10.14329289	5.34E-05	IPKIVITGPH	26	full	9799.832804	full_calibration2.csv	0.005232466	0.000515855	0.063	0.191114461	0.018841461	3.463818362	-1.200659451	0.382578737	3.900696338	0.908854428	-1.417941592	0.189862636	-1.997466586	0.173505596	-2.714123126	0.206878212	-1.121214318	0.146121761	45.76298446	8.688680854
1886	5969.985379	1000	6003.25	1668.796079	82	0.284240677	185.4217865	MAGPTPKIVITGPHEE	Kd	641.5170526	94.84743196	6.7636734	0.00050991	TPKIVITGPH	27	full	9799.832804	full_calibration2.csv	0.001558805	0.000230467	1	0.641517053	0.094847432	3.77838643	0	0.574800742	3.756575991	0.897239853	-0.706452293	0.207568323	-1.285977287	0.192719952	-2.002633827	0.223238399	-0.409725019	0.168488448	151.910098	31.53172422
1887	1598.110696	125	2261	569.31125	81	0.268668991	63.65093276	MAGPTPKIVITGPHEE	Kd	641.5170526	94.84743196	6.7636734	0.00050991	TPKIVITGPH	27	full	9799.832804	full_calibration2.csv	0.001558805	0.000230467	0.125	0.641517053	0.094847432	3.354300562	-0.903089987	0.574800742	3.756575991	0.897239853	-0.706452293	0.207568323	-1.285977287	0.192719952	-2.002633827	0.223238399	-0.409725019	0.168488448	151.910098	31.53172422
1888	7419.852008	2000	6035	2144.69098	77	0.368429613	246.0129276	MAGPTPKIVITGPHEE	Kd	641.5170526	94.84743196	6.7636734	0.00050991	TPKIVITGPH	27	full	9799.832804	full_calibration2.csv	0.001558805	0.000230467	2	0.641517053	0.094847432	3.780677274	0.301029996	0.574800742	3.756575991	0.897239853	-0.706452293	0.207568323	-1.285977287	0.192719952	-2.002633827	0.223238399	-0.409725019	0.168488448	151.910098	31.53172422
1889	2748.077778	250	3283.75	843.7530475	84	0.267611333	92.61392888	MAGPTPKIVITGPHEE	Kd	641.5170526	94.84743196	6.7636734	0.00050991	TPKIVITGPH	27	full	9799.832804	full_calibration2.csv	0.001558805	0.000230467	0.25	0.641517053	0.094847432	3.516370086	-0.602059991	0.574800742	3.756575991	0.897239853	-0.706452293	0.207568323	-1.285977287	0.192719952	-2.002633827	0.223238399	-0.409725019	0.168488448	151.910098	31.53172422
1890	465.6075871	32	541	226.3067788	52	0.662609938	31.68928753	MAGPTPKIVITGPHEE	Kd	641.5170526	94.84743196	6.7636734	0.00050991	TPKIVITGPH	27	full	9799.832804	full_calibration2.csv	0.001558805	0.000230467	0.032	0.641517053	0.094847432	2.733197265	-1.494850022	0.574800742	3.756575991	0.897239853	-0.706452293	0.207568323	-1.285977287	0.192719952	-2.002633827	0.223238399	-0.409725019	0.168488448	151.910098	31.53172422
1891	4292.4601	500	4368	1350.167101	73	0.336068598	159.1187188	MAGPTPKIVITGPHEE	Kd	641.5170526	94.84743196	6.7636734	0.00050991	TPKIVITGPH	27	full	9799.832804	full_calibration2.csv	0.001558805	0.000230467	0.5	0.641517053	0.094847432	3.64028263	-0.301029996	0.574800742	3.756575991	0.897239853	-0.706452293	0.207568323	-1.285977287	0.192719952	-2.002633827	0.223238399	-0.409725019	0.168488448	151.910098	31.53172422
1892	876.3300539	63	1197.5	437.1063562	73	0.450275369	51.51347809	MAGPTPKIVITGPHEE	Kd	641.5170526	94.84743196	6.7636734	0.00050991	TPKIVITGPH	27	full	9799.832804	full_calibration2.csv	0.001558805	0.000230467	0.063	0.641517053	0.094847432	3.078275522	-1.200659451	0.574800742	3.756575991	0.897239853	-0.706452293	0.207568323	-1.285977287	0.192719952	-2.002633827	0.223238399	-0.409725019	0.168488448	151.910098	31.53172422
1893	5710.295779	1000	5592	1468.168978	102	0.266523164	146.0882734	MAGPTPKIVITGPHEE	Kd	716.1690362	113.1770831	6.327862641	0.00072829	TPKIVITGPH	28	full	9799.832804	full_calibration2.csv	0.001396318	0.000220662	1	0.716169036	0.113177083	3.747567163	0	0.557687152	3.73601668	0.900954177	-0.706452293	0.207568323	-1.285977287	0.192719952	-2.002633827	0.223238399	-0.409725019	0.168488448	151.910098	31.53172422
1894	1456.281732	125	2231	513.1566571	86	0.245658658	55.65965428	MAGPTPKIVITGPHEE	Kd	716.1690362	113.1770831	6.327862641	0.00072829	TPKIVITGPH	28	full	9799.832804	full_calibration2.csv	0.001396318	0.000220662	0.125	0.716169036	0.113177083	3.34849957	-0.903089987	0.557687152	3.73601668	0.900954177	-0.706452293	0.207568323	-1.285977287	0.192719952	-2.002633827	0.223238399	-0.409725019	0.168488448	151.910098	31.53172422
1895	7215.922627	2000	5895	1858.958985	84	0.310299335	204.0472574	MAGPTPKIVITGPHEE	Kd	716.1690362	113.1770831	6.327862641	0.00072829	TPKIVITGPH	28	full	9799.832804	full_calibration2.csv	0.001396318	0.000220662	2	0.716169036	0.113177083	3.770483809	0.301029996	0.557687152	3.73601668	0.900954177	-0.706452293	0.207568323	-1.285977287	0.192719952	-2.002633827	0.223238399	-0.409725019	0.168488448	151.910098	31.53172422
1896	2535.744895	250	3297.25	788.8670524	84	0.251989635	86.58940823	MAGPTPKIVITGPHEE	Kd	716.1690362	113.1770831	6.327862641	0.00072829	TPKIVITGPH	28	full	9799.832804	full_calibration2.csv	0.001396318	0.000220662	0.25	0.716169036	0.113177083	3.518151877	-0.602059991	0.557687152	3.73601668	0.900954177	-0.706452293	0.207568323	-1.285977287	0.192719952	-2.002633827	0.223238399	-0.409725019	0.168488448	151.910098	31.53172422
1897	419.149463	32	561.5	266.5705505	98	0.660003132	27.06613862	MAGPTPKIVITGPHEE	Kd	716.1690362	113.1770831	6.327862641	0.00072829	TPKIVITGPH	28	full	9799.832804	full_calibration2.csv	0.001396318	0.000220662	0.032	0.716169036	0.113177083	2.749349761	-1.494850022	0.557687152	3.73601668	0.900954177	-0.706452293	0.207568323	-1.285977287	0.192719952	-2.002633827	0.223238399	-0.409725019	0.168488448	151.910098	31.53172422
1898	4028.976447	500	4060	1383.815409	78	0.332785878	157.7004018	MAGPTPKIVITGPHEE	Kd	716.1690362	113.1770831	6.327862641	0.00072829	TPKIVITGPH	28	full	9799.832804	full_calibration2.csv	0.001396318	0.000220662	0.5	0.716169036	0.113177083	3.608526034	-0.301029996	0.557687152	3.73601668	0.900954177	-0.706452293	0.207568323	-1.285977287	0.192719952	-2.002633827	0.223238399	-0.409725019	0.168488448	151.910098	31.53172422
1899	792.3690984	63	1166.5	351.8907768	79	0.3385069	39.84378451	MAGPTPKIVITGPHEE	Kd	716.1690362	113.1770831	6.327862641	0.00072829	TPKIVITGPH	28	full	9799.832804	full_calibration2.csv	0.001396318	0.000220662	0.063	0.716169036	0.113177083	3.066884743	-1.200659451	0.557687152	3.73601668	0.900954177	-0.706452293	0.207568323	-1.285977287	0.192719952	-2.002633827	0.223238399	-0.409725019	0.168488448	151.910098	31.53172422
1900	835.013191	1000	1011	445.7128181	79	0.482680658	50.46703877	MAGPHPKIVITTPHEE	Kd	10736.14131	1252.098302	8.574519498	0.000138205	HPKIVITTPH	29	full	9799.832804	full_calibration2.csv	9.31E-05	1.09E-05	1	10.73614131	1.252098302	3.004751156	0	0.563233322	2.965030555	0.988739281	0.964346113	0.186619089	0.38482112	0.169950156	-0.331835421	0.203905513	1.261073387	0.141881756	2542.299182	474.4415565
1901	112.785486	125	254.5	88.46603962	55	1.017701773	12.03870315	MAGPHPKIVITTPHEE	Kd	10736.14131	1252.098302	8.574519498	0.000138205	HPKIVITTPH	29	full	9799.832804	full_calibration2.csv	9.31E-05	1.09E-05	0.125	10.73614131	1.252098302	2.405687787	-0.903089987	0.563233322	2.965030555	0.988739281	0.964346113	0.186619089	0.38482112	0.169950156	-0.331835421	0.203905513	1.261073387	0.141881756	2542.299182	474.4415565
1902	1538.901394	2000	1322.5	412.1469987	65	0.342161759	51.51837483	MAGPHPKIVITTPHEE	Kd	10736.14131	1252.098302	8.574519498	0.000138205	HPKIVITTPH	29	full	9799.832804	full_calibration2.csv	9.31E-05	1.09E-05	2	10.73614131	1.252098302	3.121395681	0.301029996	0.563233322	2.965030555	0.988739281	0.964346113	0.186619089	0.38482112	0.169950156	-0.331835421	0.203905513	1.261073387	0.141881756	2542.299182	474.4415565
1903	223.0044319	250	437	843.2554151	82	5.531534262	93.69504613	MAGPHPKIVITTPHEE	Kd	10736.14131	1252.098302	8.574519498	0.000138205	HPKIVITTPH	29	full	9799.832804	full_calibration2.csv	9.31E-05	1.09E-05	0.25	10.73614131	1.252098302	2.640481437	-0.602059991	0.563233322	2.965030555	0.988739281	0.964346113	0.186619089	0.38482112	0.169950156	-0.331835421	0.203905513	1.261073387	0.141881756	2542.299182	474.4415565
1904	29.12244934	32	147.75	38.8708517	70	-1.631759892	4.679500643	MAGPHPKIVITTPHEE	Kd	10736.14131	1252.098302	8.574519498	0.000138205	HPKIVITTPH	29	full	9799.832804	full_calibration2.csv	9.31E-05	1.09E-05	0.032	10.73614131	1.252098302	2.16952749	-1.494850022	0.563233322	2.965030555	0.988739281	0.964346113	0.186619089	0.38482112	0.169950156	-0.331835421	0.203905513	1.261073387	0.141881756	2542.299182	474.4415565
1905	436.085331	500	612	482.9696494	83	1.077390838	53.33507543	MAGPHPKIVITTPHEE	Kd	10736.14131	1252.098302	8.574519498	0.000138205	HPKIVITTPH	29	full	9799.832804	full_calibration2.csv	9.31E-05	1.09E-05	0.5	10.73614131	1.252098302	2.786751422	-0.301029996	0.563233322	2.965030555	0.988739281	0.964346113	0.186619089	0.38482112	0.169950156	-0.331835421	0.203905513	1.261073387	0.141881756	2542.299182	474.4415565
1906	57.17023688	63	182.25	357.326984	70	-15.25176151	43.0171138	MAGPHPKIVITTPHEE	Kd	10736.14131	1252.098302	8.574519498	0.000138205	HPKIVITTPH	29	full	9799.832804	full_calibration2.csv	9.31E-05	1.09E-05	0.063	10.73614131	1.252098302	2.260667537	-1.200659451	0.563233322	2.965030555	0.988739281	0.964346113	0.186619089	0.38482112	0.169950156	-0.331835421	0.203905513	1.261073387	0.141881756	2542.299182	474.4415565
1907	843.130541	1000	1034	433.3418142	84	0.497477978	47.56544356	MAGPHPKIVITTPHEE	Kd	10623.15007	1261.686309	8.419802918	0.000153031	HPKIVITTPH	30	full	9799.832804	full_calibration2.csv	9.41E-05	1.12E-05	1	10.62315007	1.261686309	3.014520539	0	0.569379755	2.971772288	0.990230763	0.964346113	0.186619089	0.38482112	0.169950156	-0.331835421	0.203905513	1.261073387	0.141881756	2542.299182	474.4415565
1908	113.9711572	125	273.75	179.8719105	74	1.639731614	21.05241475	MAGPHPKIVITTPHEE	Kd	10623.15007	1261.686309	8.419802918	0.000153031	HPKIVITTPH	30	full	9799.832804	full_calibration2.csv	9.41E-05	1.12E-05	0.125	10.62315007	1.261686309	2.437354128	-0.903089987	0.569379755	2.971772288	0.990230763	0.964346113	0.186619089	0.38482112	0.169950156	-0.331835421	0.203905513	1.261073387	0.141881756	2542.299182	474.4415565
1909	1552.676274	2000	1328.5	598.1689572	77	0.481682995	68.61468515	MAGPHPKIVITTPHEE	Kd	10623.15007	1261.686309	8.419802918	0.000153031	HPKIVITTPH	30	full	9799.832804	full_calibration2.csv	9.41E-05	1.12E-05	2	10.62315007	1.261686309	3.123361559	0.301029996	0.569379755	2.971772288	0.990230763	0.964346113	0.186619089	0.38482112	0.169950156	-0.331835421	0.203905513	1.261073387	0.141881756	2542.299182	474.4415565
1910	225.321842	250	447	210.7772908	98	0.670807472	21.40119139	MAGPHPKIVITTPHEE	Kd	10623.15007	1261.686309	8.419802918	0.000153031	HPKIVITTPH	30	full	9799.832804	full_calibration2.csv	9.41E-05	1.12E-05	0.25	10.62315007	1.261686309	2.650307523	-0.602059991	0.569379755	2.971772288	0.990230763	0.964346113	0.186619089	0.38482112	0.169950156	-0.331835421	0.203905513	1.261073387	0.141881756	2542.299182	474.4415565
1911	29.43127481	32	144	33.20302686	83	-1.584277798	3.666660927	MAGPHPKIVITTPHEE	Kd	10623.15007	1261.686309	8.419802918	0.000153031	HPKIVITTPH	30	full	9799.832804	full_calibration2.csv	9.41E-05	1.12E-05	0.032	10.62315007	1.261686309	2.158362492	-1.494850022	0.569379755	2.971772288	0.990230763	0.964346113	0.186619089	0.38482112	0.169950156	-0.331835421	0.203905513	1.261073387	0.141881756	2542.299182	474.4415565
1912	440.5151754	500	604.25	490.7815758	98	1.104044496	49.83131909	MAGPHPKIVITTPHEE	Kd	10623.15007	1261.686309	8.419802918	0.000153031	HPKIVITTPH	30	full	9799.832804	full_calibration2.csv	9.41E-05	1.12E-05	0.5	10.62315007	1.261686309	2.781216659	-0.301029996	0.569379755	2.971772288	0.990230763	0.964346113	0.186619089	0.38482112	0.169950156	-0.331835421	0.203905513	1.261073387	0.141881756	2542.299182	474.4415565
1913	57.77473298	63	176	1135.076285	75	-5.278442543	131.9499379	MAGPHPKIVITTPHEE	Kd	10623.15007	1261.686309	8.419802918	0.000153031	HPKIVITTPH	30	full	9799.832804	full_calibration2.csv	9.41E-05	1.12E-05	0.063	10.62315007	1.261686309	2.245512668	-1.200659451	0.569379755	2.971772288	0.990230763	0.964346113	0.186619089	0.38482112	0.169950156	-0.331835421	0.203905513	1.261073387	0.141881756	2542.299182	474.4415565
1914	221.6749151	1000	272.5	677.7097251	77	5.480036632	77.73863697	MAGPHPKIVITNPHEE	Kd	43208.12701	10700.0424	4.038126708	0.006817174	HPKIVITNPH	31	full	9799.832804	full_calibration2.csv	2.31E-05	5.73E-06	1	43.20812701	10.7000424	2.435366507	0	0.232732653	2.43257965	0.956119314	1.790046939	0.287316456	1.210521946	0.276779907	0.493865406	0.298833599	2.086774214	0.260488952	10231.60769	2939.709257
1915	28.26888307	125	156.75	189.9199968	74	4.570432443	22.2284543	MAGPHPKIVITNPHEE	Kd	43208.12701	10700.0424	4.038126708	0.006817174	HPKIVITNPH	31	full	9799.832804	full_calibration2.csv	2.31E-05	5.73E-06	0.125	43.20812701	10.7000424	2.19520755	-0.903089987	0.232732653	2.43257965	0.956119314	1.790046939	0.287316456	1.210521946	0.276779907	0.493865406	0.298833599	2.086774214	0.260488952	10231.60769	2939.709257
1916	433.542969	2000	346	627.9893252	65	1.67811491	78.49866565	MAGPHPKIVITNPHEE	Kd	43208.12701	10700.0424	4.038126708	0.006817174	HPKIVITNPH	31	full	9799.832804	full_calibration2.csv	2.31E-05	5.73E-06	2	43.20812701	10.7000424	2.539076099	0.301029996	0.232732653	2.43257965	0.956119314	1.790046939	0.287316456	1.210521946	0.276779907	0.493865406	0.298833599	2.086774214	0.260488952	10231.60769	2939.709257
1917	56.37514475	250	184.5	159.9710825	61	2.614396794	20.65217795	MAGPHPKIVITNPHEE	Kd	43208.12701	10700.0424	4.038126708	0.006817174	HPKIVITNPH	31	full	9799.832804	full_calibration2.csv	2.31E-05	5.73E-06	0.25	43.20812701	10.7000424	2.26599637	-0.602059991	0.232732653	2.43257965	0.956119314	1.790046939	0.287316456	1.210521946	0.276779907	0.493865406	0.298833599	2.086774214	0.260488952	10231.60769	2939.709257
1918	7.252398904	32	134	52.79544713	79	-2.524721745	5.977907229	MAGPHPKIVITNPHEE	Kd	43208.12701	10700.0424	4.038126708	0.006817174	HPKIVITNPH	31	full	9799.832804	full_calibration2.csv	2.31E-05	5.73E-06	0.032	43.20812701	10.7000424	2.127104798	-1.494850022	0.232732653	2.43257965	0.956119314	1.790046939	0.287316456	1.210521946	0.276779907	0.493865406	0.298833599	2.086774214	0.260488952	10231.60769	2939.709257
1919	112.1053849	500	218	251.26456	85	1.801407523	27.41521108	MAGPHPKIVITNPHEE	Kd	43208.12701	10700.0424	4.038126708	0.006817174	HPKIVITNPH	31	full	9799.832804	full_calibration2.csv	2.31E-05	5.73E-06	0.5	43.20812701	10.7000424	2.338456494	-0.301029996	0.232732653	2.43257965	0.956119314	1.790046939	0.287316456	1.210521946	0.276779907	0.493865406	0.298833599	2.086774214	0.260488952	10231.60769	2939.709257
1920	14.26793128	63	141	62.19657401	96	-2.437587714	6.381233851	MAGPHPKIVITNPHEE	Kd	43208.12701	10700.0424	4.038126708	0.006817174	HPKIVITNPH	31	full	9799.832804	full_calibration2.csv	2.31E-05	5.73E-06	0.063	43.20812701	10.7000424	2.149219113	-1.200659451	0.232732653	2.43257965	0.956119314	1.790046939	0.287316456	1.210521946	0.276779907	0.493865406	0.298833599	2.086774214	0.260488952	10231.60769	2939.709257
1921	213.5014661	1000	278.5	950.5060934	92	5.979047594	99.64011249	MAGPHPKIVITNPHEE	Kd	44900.54102	11973.34721	3.75004084	0.009509311	HPKIVITNPH	32	full	9799.832804	full_calibration2.csv	2.23E-05	5.94E-06	1	44.90054102	11.97334721	2.4448252	0	0.217713206	2.423374766	0.96047444	1.790046939	0.287316456	1.210521946	0.276779907	0.493865406	0.298833599	2.086774214	0.260488952	10231.60769	2939.709257
1922	27.20631607	125	162.5	347.1967619	82	16.57649751	38.57741799	MAGPHPKIVITNPHEE	Kd	44900.54102	11973.34721	3.75004084	0.009509311	HPKIVITNPH	32	full	9799.832804	full_calibration2.csv	2.23E-05	5.94E-06	0.125	44.90054102	11.97334721	2.210853365	-0.903089987	0.217713206	2.423374766	0.96047444	1.790046939	0.287316456	1.210521946	0.276779907	0.493865406	0.298833599	2.086774214	0.260488952	10231.60769	2939.709257
1923	417.8984971	2000	321.75	577.6769395	70	2.023336207	69.54413116	MAGPHPKIVITNPHEE	Kd	44900.54102	11973.34721	3.75004084	0.009509311	HPKIVITNPH	32	full	9799.832804	full_calibration2.csv	2.23E-05	5.94E-06	2	44.90054102	11.97334721	2.507518556	0.301029996	0.217713206	2.423374766	0.96047444	1.790046939	0.287316456	1.210521946	0.276779907	0.493865406	0.298833599	2.086774214	0.260488952	10231.60769	2939.709257
1924	54.2619899	250	183	203.9279155	81	3.000301727	22.79983408	MAGPHPKIVITNPHEE	Kd	44900.54102	11973.34721	3.75004084	0.009509311	HPKIVITNPH	32	full	9799.832804	full_calibration2.csv	2.23E-05	5.94E-06	0.25	44.90054102	11.97334721	2.26245109	-0.602059991	0.217713206	2.423374766	0.96047444	1.790046939	0.287316456	1.210521946	0.276779907	0.493865406	0.298833599	2.086774214	0.260488952	10231.60769	2939.709257
1925	6.97923248	32	137	68.68866697	105	-3.936850454	6.735477947	MAGPHPKIVITNPHEE	Kd	44900.54102	11973.34721	3.75004084	0.009509311	HPKIVITNPH	32	full	9799.832804	full_calibration2.csv	2.23E-05	5.94E-06	0.032	44.90054102	11.97334721	2.136720567	-1.494850022	0.217713206	2.423374766	0.96047444	1.790046939	0.287316456	1.210521946	0.276779907	0.493865406	0.298833599	2.086774214	0.260488952	10231.60769	2939.709257
1926	107.9263879	500	216.75	229.0382898	102	1.962937912	22.79016163	MAGPHPKIVITNPHEE	Kd	44900.54102	11973.34721	3.75004084	0.009509311	HPKIVITNPH	32	full	9799.832804	full_calibration2.csv	2.23E-05	5.94E-06	0.5	44.90054102	11.97334721	2.335959106	-0.301029996	0.217713206	2.423374766	0.96047444	1.790046939	0.287316456	1.210521946	0.276779907	0.493865406	0.298833599	2.086774214	0.260488952	10231.60769	2939.709257
1927	13.73089069	63	141.5	626.6116133	100	-6.406416658	62.97683668	MAGPHPKIVITNPHEE	Kd	44900.54102	11973.34721	3.75004084	0.009509311	HPKIVITNPH	32	full	9799.832804	full_calibration2.csv	2.23E-05	5.94E-06	0.063	44.90054102	11.97334721	2.15075644	-1.200659451	0.217713206	2.423374766	0.96047444	1.790046939	0.287316456	1.210521946	0.276779907	0.493865406	0.298833599	2.086774214	0.260488952	10231.60769	2939.709257
1928	2154.13652	1000	2520	962.4236809	119	0.407835688	88.59828123	MAGPIPKIIITYPGEE	Kd	3549.309068	611.1889755	5.807220369	0.001144015	IPKIIITYPG	33	full	9799.832804	full_calibration2.csv	0.000281745	4.85E-05	1	3.549309068	0.611188976	3.401400541	0	0.599074546	3.374849736	0.951836798	0.307976481	0.225561579	-0.271548513	0.21197735	-0.988205053	0.240059992	0.604703755	0.190215074	840.4700797	189.5777582
1929	333.3903267	125	816	583.6977817	126	0.99104467	52.20751673	MAGPIPKIIITYPGEE	Kd	3549.309068	611.1889755	5.807220369	0.001144015	IPKIIITYPG	33	full	9799.832804	full_calibration2.csv	0.000281745	4.85E-05	0.125	3.549309068	0.611188976	2.911690159	-0.903089987	0.599074546	3.374849736	0.951836798	0.307976481	0.225561579	-0.271548513	0.21197735	-0.988205053	0.240059992	0.604703755	0.190215074	840.4700797	189.5777582
1930	3531.910976	2000	2754.75	1208.967914	104	0.448708694	119.1231482	MAGPIPKIIITYPGEE	Kd	3549.309068	611.1889755	5.807220369	0.001144015	IPKIIITYPG	33	full	9799.832804	full_calibration2.csv	0.000281745	4.85E-05	2	3.549309068	0.611188976	3.440082192	0.301029996	0.599074546	3.374849736	0.951836798	0.307976481	0.225561579	-0.271548513	0.21197735	-0.988205053	0.240059992	0.604703755	0.190215074	840.4700797	189.5777582
1931	644.8430904	250	1229.25	1202.709545	128	1.032728833	106.7232143	MAGPIPKIIITYPGEE	Kd	3549.309068	611.1889755	5.807220369	0.001144015	IPKIIITYPG	33	full	9799.832804	full_calibration2.csv	0.000281745	4.85E-05	0.25	3.549309068	0.611188976	3.089640217	-0.602059991	0.599074546	3.374849736	0.951836798	0.307976481	0.225561579	-0.271548513	0.21197735	-0.988205053	0.240059992	0.604703755	0.190215074	840.4700797	189.5777582
1932	87.564252	32	241.5	72.72183149	131	0.828000515	6.378126548	MAGPIPKIIITYPGEE	Kd	3549.309068	611.1889755	5.807220369	0.001144015	IPKIIITYPG	33	full	9799.832804	full_calibration2.csv	0.000281745	4.85E-05	0.032	3.549309068	0.611188976	2.382917135	-1.494850022	0.599074546	3.374849736	0.951836798	0.307976481	0.225561579	-0.271548513	0.21197735	-0.988205053	0.240059992	0.604703755	0.190215074	840.4700797	189.5777582
1933	1210.062339	500	1752.75	814.3583618	166	0.484664997	63.39771248	MAGPIPKIIITYPGEE	Kd	3549.309068	611.1889755	5.807220369	0.001144015	IPKIIITYPG	33	full	9799.832804	full_calibration2.csv	0.000281745	4.85E-05	0.5	3.549309068	0.611188976	3.243719976	-0.301029996	0.599074546	3.374849736	0.951836798	0.307976481	0.225561579	-0.271548513	0.21197735	-0.988205053	0.240059992	0.604703755	0.190215074	840.4700797	189.5777582
1934	170.9126919	63	434.5	176.6399802	121	0.608981896	16.12495029	MAGPIPKIIITYPGEE	Kd	3549.309068	611.1889755	5.807220369	0.001144015	IPKIIITYPG	33	full	9799.832804	full_calibration2.csv	0.000281745	4.85E-05	0.063	3.549309068	0.611188976	2.637989781	-1.200659451	0.599074546	3.374849736	0.951836798	0.307976481	0.225561579	-0.271548513	0.21197735	-0.988205053	0.240059992	0.604703755	0.190215074	840.4700797	189.5777582
1935	2060.220541	1000	2472.5	988.2560944	105	0.410501145	96.90648288	MAGPIPKIIITYPGEE	Kd	3756.691145	673.2812792	5.57967563	0.00140697	IPKIIITYPG	34	full	9799.832804	full_calibration2.csv	0.000266192	4.77E-05	1	3.756691145	0.673281279	3.3931363	0	0.59356663	3.357645021	0.954081582	0.307976481	0.225561579	-0.271548513	0.21197735	-0.988205053	0.240059992	0.604703755	0.190215074	840.4700797	189.5777582
1936	315.5787142	125	729	382.3585261	105	0.61211876	37.49333819	MAGPIPKIIITYPGEE	Kd	3756.691145	673.2812792	5.57967563	0.00140697	IPKIIITYPG	34	full	9799.832804	full_calibration2.csv	0.000266192	4.77E-05	0.125	3.756691145	0.673281279	2.862727528	-0.903089987	0.59356663	3.357645021	0.954081582	0.307976481	0.225561579	-0.271548513	0.21197735	-0.988205053	0.240059992	0.604703755	0.190215074	840.4700797	189.5777582
1937	3404.675553	2000	2609	967.4284294	93	0.367920977	100.861386	MAGPIPKIIITYPGEE	Kd	3756.691145	673.2812792	5.57967563	0.00140697	IPKIIITYPG	34	full	9799.832804	full_calibration2.csv	0.000266192	4.77E-05	2	3.756691145	0.673281279	3.416474079	0.301029996	0.59356663	3.357645021	0.954081582	0.307976481	0.225561579	-0.271548513	0.21197735	-0.988205053	0.240059992	0.604703755	0.190215074	840.4700797	189.5777582
1938	611.4666971	250	1208	564.3916087	139	0.518101649	48.04420428	MAGPIPKIIITYPGEE	Kd	3756.691145	673.2812792	5.57967563	0.00140697	IPKIIITYPG	34	full	9799.832804	full_calibration2.csv	0.000266192	4.77E-05	0.25	3.756691145	0.673281279	3.082066934	-0.602059991	0.59356663	3.357645021	0.954081582	0.307976481	0.225561579	-0.271548513	0.21197735	-0.988205053	0.240059992	0.604703755	0.190215074	840.4700797	189.5777582
1939	82.77123621	32	239.75	98.40057884	140	1.131738019	8.346228165	MAGPIPKIIITYPGEE	Kd	3756.691145	673.2812792	5.57967563	0.00140697	IPKIIITYPG	34	full	9799.832804	full_calibration2.csv	0.000266192	4.77E-05	0.032	3.756691145	0.673281279	2.379758616	-1.494850022	0.59356663	3.357645021	0.954081582	0.307976481	0.225561579	-0.271548513	0.21197735	-0.988205053	0.240059992	0.604703755	0.190215074	840.4700797	189.5777582
1940	1151.109215	500	1714	757.2246584	150	0.449304383	62.03426112	MAGPIPKIIITYPGEE	Kd	3756.691145	673.2812792	5.57967563	0.00140697	IPKIIITYPG	34	full	9799.832804	full_calibration2.csv	0.000266192	4.77E-05	0.5	3.756691145	0.673281279	3.234010818	-0.301029996	0.59356663	3.357645021	0.954081582	0.307976481	0.225561579	-0.271548513	0.21197735	-0.988205053	0.240059992	0.604703755	0.190215074	840.4700797	189.5777582
1941	161.6333476	63	438.5	206.1979863	102	0.717944858	20.5174665	MAGPIPKIIITYPGEE	Kd	3756.691145	673.2812792	5.57967563	0.00140697	IPKIIITYPG	34	full	9799.832804	full_calibration2.csv	0.000266192	4.77E-05	0.063	3.756691145	0.673281279	2.641969598	-1.200659451	0.59356663	3.357645021	0.954081582	0.307976481	0.225561579	-0.271548513	0.21197735	-0.988205053	0.240059992	0.604703755	0.190215074	840.4700797	189.5777582
1942	4896.442088	1000	4955.25	1447.406019	130	0.301899491	127.4369941	MAGPVPKIIITYPGEE	Kd	1001.419118	161.4514412	6.20260253	0.000809722	VPKIIITYPG	35	full	9799.832804	full_calibration2.csv	0.000998583	0.000160994	1	1.001419118	0.161451441	3.69506557	0	0.607351671	3.680916979	0.904459315	-0.442367082	0.217297323	-1.021892075	0.20316126	-1.738548615	0.232312076	-0.145639808	0.180338224	237.1342675	51.5286414
1943	1087.4985	125	1855	705.8720748	117	0.441386968	65.53857682	MAGPVPKIIITYPGEE	Kd	1001.419118	161.4514412	6.20260253	0.000809722	VPKIIITYPG	35	full	9799.832804	full_calibration2.csv	0.000998583	0.000160994	0.125	1.001419118	0.161451441	3.268343914	-0.903089987	0.607351671	3.680916979	0.904459315	-0.442367082	0.217297323	-1.021892075	0.20316126	-1.738548615	0.232312076	-0.145639808	0.180338224	237.1342675	51.5286414
1944	6530.13286	2000	5226	1564.711118	79	0.314917835	177.1686465	MAGPVPKIIITYPGEE	Kd	1001.419118	161.4514412	6.20260253	0.000809722	VPKIIITYPG	35	full	9799.832804	full_calibration2.csv	0.000998583	0.000160994	2	1.001419118	0.161451441	3.718169405	0.301029996	0.607351671	3.680916979	0.904459315	-0.442367082	0.217297323	-1.021892075	0.20316126	-1.738548615	0.232312076	-0.145639808	0.180338224	237.1342675	51.5286414
1945	1957.743945	250	2690	953.082939	121	0.397638902	87.00417081	MAGPVPKIIITYPGEE	Kd	1001.419118	161.4514412	6.20260253	0.000809722	VPKIIITYPG	35	full	9799.832804	full_calibration2.csv	0.000998583	0.000160994	0.25	1.001419118	0.161451441	3.42975228	-0.602059991	0.607351671	3.680916979	0.904459315	-0.442367082	0.217297323	-1.021892075	0.20316126	-1.738548615	0.232312076	-0.145639808	0.180338224	237.1342675	51.5286414
1946	303.4535014	32	414	465.1832731	109	2.532273417	44.76228133	MAGPVPKIIITYPGEE	Kd	1001.419118	161.4514412	6.20260253	0.000809722	VPKIIITYPG	35	full	9799.832804	full_calibration2.csv	0.000998583	0.000160994	0.032	1.001419118	0.161451441	2.617000341	-1.494850022	0.607351671	3.680916979	0.904459315	-0.442367082	0.217297323	-1.021892075	0.20316126	-1.738548615	0.232312076	-0.145639808	0.180338224	237.1342675	51.5286414
1947	3263.523385	500	3548.5	1002.28967	92	0.30537069	105.0685063	MAGPVPKIIITYPGEE	Kd	1001.419118	161.4514412	6.20260253	0.000809722	VPKIIITYPG	35	full	9799.832804	full_calibration2.csv	0.000998583	0.000160994	0.5	1.001419118	0.161451441	3.55004481	-0.301029996	0.607351671	3.680916979	0.904459315	-0.442367082	0.217297323	-1.021892075	0.20316126	-1.738548615	0.232312076	-0.145639808	0.180338224	237.1342675	51.5286414
1948	580.0247819	63	864.5	577.482446	119	0.900359789	53.16156821	MAGPVPKIIITYPGEE	Kd	1001.419118	161.4514412	6.20260253	0.000809722	VPKIIITYPG	35	full	9799.832804	full_calibration2.csv	0.000998583	0.000160994	0.063	1.001419118	0.161451441	2.936764998	-1.200659451	0.607351671	3.680916979	0.904459315	-0.442367082	0.217297323	-1.021892075	0.20316126	-1.738548615	0.232312076	-0.145639808	0.180338224	237.1342675	51.5286414
1949	4835.787482	1000	4769.25	1488.622207	134	0.311963723	129.0799157	MAGPVPKIIITYPGEE	Kd	1026.522638	163.0594903	6.295387261	0.000748463	VPKIIITYPG	36	full	9799.832804	full_calibration2.csv	0.000974163	0.000154742	1	1.026522638	0.16305949	3.678450088	0	0.594808405	3.675767225	0.906723195	-0.442367082	0.217297323	-1.021892075	0.20316126	-1.738548615	0.232312076	-0.145639808	0.180338224	237.1342675	51.5286414
1950	1063.790724	125	1794.75	602.2263594	98	0.389474129	61.14682246	MAGPVPKIIITYPGEE	Kd	1026.522638	163.0594903	6.295387261	0.000748463	VPKIIITYPG	36	full	9799.832804	full_calibration2.csv	0.000974163	0.000154742	0.125	1.026522638	0.16305949	3.254003962	-0.903089987	0.594808405	3.675767225	0.906723195	-0.442367082	0.217297323	-1.021892075	0.20316126	-1.738548615	0.232312076	-0.145639808	0.180338224	237.1342675	51.5286414
1951	6475.968613	2000	5262.5	1995.659223	77	0.359355822	228.9178126	MAGPVPKIIITYPGEE	Kd	1026.522638	163.0594903	6.295387261	0.000748463	VPKIIITYPG	36	full	9799.832804	full_calibration2.csv	0.000974163	0.000154742	2	1.026522638	0.16305949	3.721192109	0.301029996	0.594808405	3.675767225	0.906723195	-0.442367082	0.217297323	-1.021892075	0.20316126	-1.738548615	0.232312076	-0.145639808	0.180338224	237.1342675	51.5286414
1952	1919.243834	250	2710	795.3520238	138	0.307656845	67.95150921	MAGPVPKIIITYPGEE	Kd	1026.522638	163.0594903	6.295387261	0.000748463	VPKIIITYPG	36	full	9799.832804	full_calibration2.csv	0.000974163	0.000154742	0.25	1.026522638	0.16305949	3.432969291	-0.602059991	0.594808405	3.675767225	0.906723195	-0.442367082	0.217297323	-1.021892075	0.20316126	-1.738548615	0.232312076	-0.145639808	0.180338224	237.1342675	51.5286414
1953	296.2569137	32	417	123.547234	121	0.492122834	11.27826783	MAGPVPKIIITYPGEE	Kd	1026.522638	163.0594903	6.295387261	0.000748463	VPKIIITYPG	36	full	9799.832804	full_calibration2.csv	0.000974163	0.000154742	0.032	1.026522638	0.16305949	2.620136055	-1.494850022	0.594808405	3.675767225	0.906723195	-0.442367082	0.217297323	-1.021892075	0.20316126	-1.738548615	0.232312076	-0.145639808	0.180338224	237.1342675	51.5286414
1954	3209.855053	500	3522.5	1098.944294	103	0.326026255	108.8116993	MAGPVPKIIITYPGEE	Kd	1026.522638	163.0594903	6.295387261	0.000748463	VPKIIITYPG	36	full	9799.832804	full_calibration2.csv	0.000974163	0.000154742	0.5	1.026522638	0.16305949	3.546851002	-0.301029996	0.594808405	3.675767225	0.906723195	-0.442367082	0.217297323	-1.021892075	0.20316126	-1.738548615	0.232312076	-0.145639808	0.180338224	237.1342675	51.5286414
1955	566.660522	63	951	241.3064728	97	0.31649104	24.62823875	MAGPVPKIIITYPGEE	Kd	1026.522638	163.0594903	6.295387261	0.000748463	VPKIIITYPG	36	full	9799.832804	full_calibration2.csv	0.000974163	0.000154742	0.063	1.026522638	0.16305949	2.978180517	-1.200659451	0.594808405	3.675767225	0.906723195	-0.442367082	0.217297323	-1.021892075	0.20316126	-1.738548615	0.232312076	-0.145639808	0.180338224	237.1342675	51.5286414
1956	5617.04818	1000	5360	1837.202993	147	0.333314829	152.0480016	MAGPIPKIIVTYPGEE	Kd	744.6588475	108.6902406	6.851202494	0.000475729	IPKIIVTYPG	37	full	9799.832804	full_calibration2.csv	0.001342897	0.000196009	1	0.744658848	0.108690241	3.72916479	0	0.591998606	3.73240824	0.908870621	-0.618041672	0.20622716	-1.197566665	0.191274705	-1.914223205	0.221991927	-0.321314397	0.16683342	176.3338917	36.36483765
1957	1408.574298	125	1784	691.6756865	155	0.420747117	55.73681518	MAGPIPKIIVTYPGEE	Kd	744.6588475	108.6902406	6.851202494	0.000475729	IPKIIVTYPG	37	full	9799.832804	full_calibration2.csv	0.001342897	0.000196009	0.125	0.744658848	0.108690241	3.25139485	-0.903089987	0.591998606	3.73240824	0.908870621	-0.618041672	0.20622716	-1.197566665	0.191274705	-1.914223205	0.221991927	-0.321314397	0.16683342	176.3338917	36.36483765
1958	7141.020687	2000	5907	1977.328815	119	0.332547262	182.0278719	MAGPIPKIIVTYPGEE	Kd	744.6588475	108.6902406	6.851202494	0.000475729	IPKIIVTYPG	37	full	9799.832804	full_calibration2.csv	0.001342897	0.000196009	2	0.744658848	0.108690241	3.771366971	0.301029996	0.591998606	3.73240824	0.908870621	-0.618041672	0.20622716	-1.197566665	0.191274705	-1.914223205	0.221991927	-0.321314397	0.16683342	176.3338917	36.36483765
1959	2463.114069	250	3268	1025.689011	130	0.330821042	90.30688195	MAGPIPKIIVTYPGEE	Kd	744.6588475	108.6902406	6.851202494	0.000475729	IPKIIVTYPG	37	full	9799.832804	full_calibration2.csv	0.001342897	0.000196009	0.25	0.744658848	0.108690241	3.514282048	-0.602059991	0.591998606	3.73240824	0.908870621	-0.618041672	0.20622716	-1.197566665	0.191274705	-1.914223205	0.221991927	-0.321314397	0.16683342	176.3338917	36.36483765
1960	403.7740003	32	491.5	160.3290219	160	0.47215482	12.71491851	MAGPIPKIIVTYPGEE	Kd	744.6588475	108.6902406	6.851202494	0.000475729	IPKIIVTYPG	37	full	9799.832804	full_calibration2.csv	0.001342897	0.000196009	0.032	0.744658848	0.108690241	2.691523522	-1.494850022	0.591998606	3.73240824	0.908870621	-0.618041672	0.20622716	-1.197566665	0.191274705	-1.914223205	0.221991927	-0.321314397	0.16683342	176.3338917	36.36483765
1961	3936.754567	500	4268	1415.075685	156	0.347732365	113.6616142	MAGPIPKIIVTYPGEE	Kd	744.6588475	108.6902406	6.851202494	0.000475729	IPKIIVTYPG	37	full	9799.832804	full_calibration2.csv	0.001342897	0.000196009	0.5	0.744658848	0.108690241	3.630224411	-0.301029996	0.591998606	3.73240824	0.908870621	-0.618041672	0.20622716	-1.197566665	0.191274705	-1.914223205	0.221991927	-0.321314397	0.16683342	176.3338917	36.36483765
1962	764.4186262	63	1127.5	318.0846502	136	0.331500678	27.37636785	MAGPIPKIIVTYPGEE	Kd	744.6588475	108.6902406	6.851202494	0.000475729	IPKIIVTYPG	37	full	9799.832804	full_calibration2.csv	0.001342897	0.000196009	0.063	0.744658848	0.108690241	3.052116551	-1.200659451	0.591998606	3.73240824	0.908870621	-0.618041672	0.20622716	-1.197566665	0.191274705	-1.914223205	0.221991927	-0.321314397	0.16683342	176.3338917	36.36483765
1963	5610.988835	1000	5389	1573.94764	114	0.300252061	148.064539	MAGPIPKIIVTYPGEE	Kd	746.5429165	117.268947	6.366075039	0.000705345	IPKIIVTYPG	38	full	9799.832804	full_calibration2.csv	0.001339508	0.000210413	1	0.746542917	0.117268947	3.731508184	0	0.583234894	3.729708558	0.904875677	-0.618041672	0.20622716	-1.197566665	0.191274705	-1.914223205	0.221991927	-0.321314397	0.16683342	176.3338917	36.36483765
1964	1405.529294	125	1789.5	653.9459978	139	0.404801108	55.66758014	MAGPIPKIIVTYPGEE	Kd	746.5429165	117.268947	6.366075039	0.000705345	IPKIIVTYPG	38	full	9799.832804	full_calibration2.csv	0.001339508	0.000210413	0.125	0.746542917	0.117268947	3.252731703	-0.903089987	0.583234894	3.729708558	0.904875677	-0.618041672	0.20622716	-1.197566665	0.191274705	-1.914223205	0.221991927	-0.321314397	0.16683342	176.3338917	36.36483765
1965	7136.122101	2000	5756	3298.326248	83	0.539306895	364.2392011	MAGPIPKIIVTYPGEE	Kd	746.5429165	117.268947	6.366075039	0.000705345	IPKIIVTYPG	38	full	9799.832804	full_calibration2.csv	0.001339508	0.000210413	2	0.746542917	0.117268947	3.760120785	0.301029996	0.583234894	3.729708558	0.904875677	-0.618041672	0.20622716	-1.197566665	0.191274705	-1.914223205	0.221991927	-0.321314397	0.16683342	176.3338917	36.36483765
1966	2458.457293	250	3221.5	1159.625497	106	0.379171244	113.1678607	MAGPIPKIIVTYPGEE	Kd	746.5429165	117.268947	6.366075039	0.000705345	IPKIIVTYPG	38	full	9799.832804	full_calibration2.csv	0.001339508	0.000210413	0.25	0.746542917	0.117268947	3.508058136	-0.602059991	0.583234894	3.729708558	0.904875677	-0.618041672	0.20622716	-1.197566665	0.191274705	-1.914223205	0.221991927	-0.321314397	0.16683342	176.3338917	36.36483765
1967	402.7968697	32	502	163.2118067	117	0.465393207	15.15383582	MAGPIPKIIVTYPGEE	Kd	746.5429165	117.268947	6.366075039	0.000705345	IPKIIVTYPG	38	full	9799.832804	full_calibration2.csv	0.001339508	0.000210413	0.032	0.746542917	0.117268947	2.700703717	-1.494850022	0.583234894	3.729708558	0.904875677	-0.618041672	0.20622716	-1.197566665	0.191274705	-1.914223205	0.221991927	-0.321314397	0.16683342	176.3338917	36.36483765
1968	3930.804417	500	4365.5	1267.506857	145	0.311010677	105.6255714	MAGPIPKIIVTYPGEE	Kd	746.5429165	117.268947	6.366075039	0.000705345	IPKIIVTYPG	38	full	9799.832804	full_calibration2.csv	0.001339508	0.000210413	0.5	0.746542917	0.117268947	3.640033993	-0.301029996	0.583234894	3.729708558	0.904875677	-0.618041672	0.20622716	-1.197566665	0.191274705	-1.914223205	0.221991927	-0.321314397	0.16683342	176.3338917	36.36483765
1969	762.6395761	63	1161	384.7317781	140	0.369349683	32.63252351	MAGPIPKIIVTYPGEE	Kd	746.5429165	117.268947	6.366075039	0.000705345	IPKIIVTYPG	38	full	9799.832804	full_calibration2.csv	0.001339508	0.000210413	0.063	0.746542917	0.117268947	3.06483222	-1.200659451	0.583234894	3.729708558	0.904875677	-0.618041672	0.20622716	-1.197566665	0.191274705	-1.914223205	0.221991927	-0.321314397	0.16683342	176.3338917	36.36483765
1970	4487.042878	1000	4512	1253.8367	93	0.279890722	130.7215124	MAGPIPKIIVTYPDEE	Kd	1184.02923	231.0253526	5.125105176	0.002167368	IPKIIVTYPD	39	full	9799.832804	full_calibration2.csv	0.000844574	0.000164791	1	1.18402923	0.231025353	3.654369091	0	0.539583745	3.640265186	0.909661232	-0.343036551	0.243508517	-0.922561544	0.230982183	-1.639218084	0.256996443	-0.046309276	0.211187467	280.3760175	68.2739481
1971	935.7920145	125	1764.5	735.7371658	96	0.469369803	75.48504049	MAGPIPKIIVTYPDEE	Kd	1184.02923	231.0253526	5.125105176	0.002167368	IPKIIVTYPD	39	full	9799.832804	full_calibration2.csv	0.000844574	0.000164791	0.125	1.18402923	0.231025353	3.246621663	-0.903089987	0.539583745	3.640265186	0.909661232	-0.343036551	0.243508517	-0.922561544	0.230982183	-1.639218084	0.256996443	-0.046309276	0.211187467	280.3760175	68.2739481
1972	6155.617361	2000	4720	2429.180296	81	0.487848888	271.5906136	MAGPIPKIIVTYPDEE	Kd	1184.02923	231.0253526	5.125105176	0.002167368	IPKIIVTYPD	39	full	9799.832804	full_calibration2.csv	0.000844574	0.000164791	2	1.18402923	0.231025353	3.673941999	0.301029996	0.539583745	3.640265186	0.909661232	-0.343036551	0.243508517	-0.922561544	0.230982183	-1.639218084	0.256996443	-0.046309276	0.211187467	280.3760175	68.2739481
1973	1708.443698	250	2696.5	717.9030612	119	0.283410207	66.08833362	MAGPIPKIIVTYPDEE	Kd	1184.02923	231.0253526	5.125105176	0.002167368	IPKIIVTYPD	39	full	9799.832804	full_calibration2.csv	0.000844574	0.000164791	0.25	1.18402923	0.231025353	3.430800425	-0.602059991	0.539583745	3.640265186	0.909661232	-0.343036551	0.243508517	-0.922561544	0.230982183	-1.639218084	0.256996443	-0.046309276	0.211187467	280.3760175	68.2739481
1974	257.8841379	32	497	372.8423645	80	1.217245721	41.94804332	MAGPIPKIIVTYPDEE	Kd	1184.02923	231.0253526	5.125105176	0.002167368	IPKIIVTYPD	39	full	9799.832804	full_calibration2.csv	0.000844574	0.000164791	0.032	1.18402923	0.231025353	2.696356389	-1.494850022	0.539583745	3.640265186	0.909661232	-0.343036551	0.243508517	-0.922561544	0.230982183	-1.639218084	0.256996443	-0.046309276	0.211187467	280.3760175	68.2739481
1975	2909.63857	500	3321	1144.441079	123	0.370666735	103.6128269	MAGPIPKIIVTYPDEE	Kd	1184.02923	231.0253526	5.125105176	0.002167368	IPKIIVTYPD	39	full	9799.832804	full_calibration2.csv	0.000844574	0.000164791	0.5	1.18402923	0.231025353	3.521268876	-0.301029996	0.539583745	3.640265186	0.909661232	-0.343036551	0.243508517	-0.922561544	0.230982183	-1.639218084	0.256996443	-0.046309276	0.211187467	280.3760175	68.2739481
1976	495.0882077	63	981.5	468.2870153	127	0.5528207	41.7183231	MAGPIPKIIVTYPDEE	Kd	1184.02923	231.0253526	5.125105176	0.002167368	IPKIIVTYPD	39	full	9799.832804	full_calibration2.csv	0.000844574	0.000164791	0.063	1.18402923	0.231025353	2.991890304	-1.200659451	0.539583745	3.640265186	0.909661232	-0.343036551	0.243508517	-0.922561544	0.230982183	-1.639218084	0.256996443	-0.046309276	0.211187467	280.3760175	68.2739481
1977	4589.26053	1000	4512.5	1411.12451	121	0.318288576	128.8174543	MAGPIPKIIVTYPDEE	Kd	1135.383847	221.5440658	5.124866885	0.002167874	IPKIIVTYPD	40	full	9799.832804	full_calibration2.csv	0.000880759	0.00017186	1	1.135383847	0.221544066	3.654417215	0	0.541792319	3.648931246	0.904175035	-0.343036551	0.243508517	-0.922561544	0.230982183	-1.639218084	0.256996443	-0.046309276	0.211187467	280.3760175	68.2739481
1978	971.9095527	125	1754	510.9458894	111	0.321835588	48.71677907	MAGPIPKIIVTYPDEE	Kd	1135.383847	221.5440658	5.124866885	0.002167874	IPKIIVTYPD	40	full	9799.832804	full_calibration2.csv	0.000880759	0.00017186	0.125	1.135383847	0.221544066	3.244029589	-0.903089987	0.541792319	3.648931246	0.904175035	-0.343036551	0.243508517	-0.922561544	0.230982183	-1.639218084	0.256996443	-0.046309276	0.211187467	280.3760175	68.2739481
1979	6251.121575	2000	4780.25	1581.206754	100	0.319633946	158.9172582	MAGPIPKIIVTYPDEE	Kd	1135.383847	221.5440658	5.124866885	0.002167874	IPKIIVTYPD	40	full	9799.832804	full_calibration2.csv	0.000880759	0.00017186	2	1.135383847	0.221544066	3.67945061	0.301029996	0.541792319	3.648931246	0.904175035	-0.343036551	0.243508517	-0.922561544	0.230982183	-1.639218084	0.256996443	-0.046309276	0.211187467	280.3760175	68.2739481
1980	1768.432776	250	2637	940.92614	118	0.386946558	86.98865242	MAGPIPKIIVTYPDEE	Kd	1135.383847	221.5440658	5.124866885	0.002167874	IPKIIVTYPD	40	full	9799.832804	full_calibration2.csv	0.000880759	0.00017186	0.25	1.135383847	0.221544066	3.42111013	-0.602059991	0.541792319	3.648931246	0.904175035	-0.343036551	0.243508517	-0.922561544	0.230982183	-1.639218084	0.256996443	-0.046309276	0.211187467	280.3760175	68.2739481
1981	268.6302801	32	483.5	391.9474821	112	1.248826309	37.20200866	MAGPIPKIIVTYPDEE	Kd	1135.383847	221.5440658	5.124866885	0.002167874	IPKIIVTYPD	40	full	9799.832804	full_calibration2.csv	0.000880759	0.00017186	0.032	1.135383847	0.221544066	2.684396478	-1.494850022	0.541792319	3.648931246	0.904175035	-0.343036551	0.243508517	-0.922561544	0.230982183	-1.639218084	0.256996443	-0.046309276	0.211187467	280.3760175	68.2739481
1982	2996.187355	500	3596.5	1110.842058	130	0.318882544	97.80418971	MAGPIPKIIVTYPDEE	Kd	1135.383847	221.5440658	5.124866885	0.002167874	IPKIIVTYPD	40	full	9799.832804	full_calibration2.csv	0.000880759	0.00017186	0.5	1.135383847	0.221544066	3.555880065	-0.301029996	0.541792319	3.648931246	0.904175035	-0.343036551	0.243508517	-0.922561544	0.230982183	-1.639218084	0.256996443	-0.046309276	0.211187467	280.3760175	68.2739481
1983	515.1850706	63	1065	394.6198491	95	0.423852271	40.70192966	MAGPIPKIIVTYPDEE	Kd	1135.383847	221.5440658	5.124866885	0.002167874	IPKIIVTYPD	40	full	9799.832804	full_calibration2.csv	0.000880759	0.00017186	0.063	1.135383847	0.221544066	3.027349608	-1.200659451	0.541792319	3.648931246	0.904175035	-0.343036551	0.243508517	-0.922561544	0.230982183	-1.639218084	0.256996443	-0.046309276	0.211187467	280.3760175	68.2739481
1984	9184.600054	1000	9321.25	1736.052261	80	0.190471606	195.3211394	MAGPHPVIVITGPZEE	Kd	66.98525205	6.167048234	10.86180122	3.61E-05	HPVIVITGPZ	41	full	9799.832804	full_calibration2.csv	0.014928659	0.001374418	1	0.066985252	0.006167048	3.969474156	0	0.233749948	3.966383558	0.93660333	-2.046254724	0.172341199	-2.625779718	0.154135849	-3.342436258	0.190924757	-1.74952745	0.122495867	15.86198864	2.733674139
1985	6380.589589	125	6153	1424.779158	75	0.235071988	165.6272128	MAGPHPVIVITGPZEE	Kd	66.98525205	6.167048234	10.86180122	3.61E-05	HPVIVITGPZ	41	full	9799.832804	full_calibration2.csv	0.014928659	0.001374418	0.125	0.066985252	0.006167048	3.789086915	-0.903089987	0.233749948	3.966383558	0.93660333	-2.046254724	0.172341199	-2.625779718	0.154135849	-3.342436258	0.190924757	-1.74952745	0.122495867	15.86198864	2.733674139
1986	9482.247437	2000	9880	2133.605754	73	0.217280706	251.4478495	MAGPHPVIVITGPZEE	Kd	66.98525205	6.167048234	10.86180122	3.61E-05	HPVIVITGPZ	41	full	9799.832804	full_calibration2.csv	0.014928659	0.001374418	2	0.066985252	0.006167048	3.994756945	0.301029996	0.233749948	3.966383558	0.93660333	-2.046254724	0.172341199	-2.625779718	0.154135849	-3.342436258	0.190924757	-1.74952745	0.122495867	15.86198864	2.733674139
1987	7728.934344	250	7304.25	1789.239616	94	0.252333947	185.5355052	MAGPHPVIVITGPZEE	Kd	66.98525205	6.167048234	10.86180122	3.61E-05	HPVIVITGPZ	41	full	9799.832804	full_calibration2.csv	0.014928659	0.001374418	0.25	0.066985252	0.006167048	3.863575629	-0.602059991	0.233749948	3.966383558	0.93660333	-2.046254724	0.172341199	-2.625779718	0.154135849	-3.342436258	0.190924757	-1.74952745	0.122495867	15.86198864	2.733674139
1988	3168.094673	32	3644.75	848.4101697	96	0.249269692	87.04504678	MAGPHPVIVITGPZEE	Kd	66.98525205	6.167048234	10.86180122	3.61E-05	HPVIVITGPZ	41	full	9799.832804	full_calibration2.csv	0.014928659	0.001374418	0.032	0.066985252	0.006167048	3.561667745	-1.494850022	0.233749948	3.966383558	0.93660333	-2.046254724	0.172341199	-2.625779718	0.154135849	-3.342436258	0.190924757	-1.74952745	0.122495867	15.86198864	2.733674139
1989	8642.052653	500	8081.5	2039.798213	91	0.253517919	215.0136107	MAGPHPVIVITGPZEE	Kd	66.98525205	6.167048234	10.86180122	3.61E-05	HPVIVITGPZ	41	full	9799.832804	full_calibration2.csv	0.014928659	0.001374418	0.5	0.066985252	0.006167048	3.907491977	-0.301029996	0.233749948	3.966383558	0.93660333	-2.046254724	0.172341199	-2.625779718	0.154135849	-3.342436258	0.190924757	-1.74952745	0.122495867	15.86198864	2.733674139
1990	4749.688575	63	4974.25	1022.760166	58	0.211551469	135.4678933	MAGPHPVIVITGPZEE	Kd	66.98525205	6.167048234	10.86180122	3.61E-05	HPVIVITGPZ	41	full	9799.832804	full_calibration2.csv	0.014928659	0.001374418	0.063	0.066985252	0.006167048	3.696727609	-1.200659451	0.233749948	3.966383558	0.93660333	-2.046254724	0.172341199	-2.625779718	0.154135849	-3.342436258	0.190924757	-1.74952745	0.122495867	15.86198864	2.733674139
1991	9160.349622	1000	9497	3347.898745	99	0.332275822	338.1888437	MAGPHPVIVITGPZEE	Kd	69.80990989	7.188056673	9.711930925	6.84E-05	HPVIVITGPZ	42	full	9799.832804	full_calibration2.csv	0.014324614	0.00147495	1	0.06980991	0.007188057	3.977586438	0	0.235513007	3.962273343	0.927399966	-2.046254724	0.172341199	-2.625779718	0.154135849	-3.342436258	0.190924757	-1.74952745	0.122495867	15.86198864	2.733674139
1992	6288.073852	125	6095.25	1479.998743	64	0.24147198	186.462315	MAGPHPVIVITGPZEE	Kd	69.80990989	7.188056673	9.711930925	6.84E-05	HPVIVITGPZ	42	full	9799.832804	full_calibration2.csv	0.014324614	0.00147495	0.125	0.06980991	0.007188057	3.784991523	-0.903089987	0.235513007	3.962273343	0.927399966	-2.046254724	0.172341199	-2.625779718	0.154135849	-3.342436258	0.190924757	-1.74952745	0.122495867	15.86198864	2.733674139
1993	9469.307067	2000	9612	1902.325571	59	0.19332194	249.7875848	MAGPHPVIVITGPZEE	Kd	69.80990989	7.188056673	9.711930925	6.84E-05	HPVIVITGPZ	42	full	9799.832804	full_calibration2.csv	0.014324614	0.00147495	2	0.06980991	0.007188057	3.982813762	0.301029996	0.235513007	3.962273343	0.927399966	-2.046254724	0.172341199	-2.625779718	0.154135849	-3.342436258	0.190924757	-1.74952745	0.122495867	15.86198864	2.733674139
1994	7660.670058	250	6955	2189.947493	69	0.30502724	265.570142	MAGPHPVIVITGPZEE	Kd	69.80990989	7.188056673	9.711930925	6.84E-05	HPVIVITGPZ	42	full	9799.832804	full_calibration2.csv	0.014324614	0.00147495	0.25	0.06980991	0.007188057	3.842297134	-0.602059991	0.235513007	3.962273343	0.927399966	-2.046254724	0.172341199	-2.625779718	0.154135849	-3.342436258	0.190924757	-1.74952745	0.122495867	15.86198864	2.733674139
1995	3080.197695	32	3541.75	886.5903205	86	0.257304006	96.16422206	MAGPHPVIVITGPZEE	Kd	69.80990989	7.188056673	9.711930925	6.84E-05	HPVIVITGPZ	42	full	9799.832804	full_calibration2.csv	0.014324614	0.00147495	0.032	0.06980991	0.007188057	3.549217903	-1.494850022	0.235513007	3.962273343	0.927399966	-2.046254724	0.172341199	-2.625779718	0.154135849	-3.342436258	0.190924757	-1.74952745	0.122495867	15.86198864	2.733674139
1996	8599.212328	500	8106.25	2257.745053	74	0.270242989	264.249071	MAGPHPVIVITGPZEE	Kd	69.80990989	7.188056673	9.711930925	6.84E-05	HPVIVITGPZ	42	full	9799.832804	full_calibration2.csv	0.014324614	0.00147495	0.5	0.06980991	0.007188057	3.908819993	-0.301029996	0.235513007	3.962273343	0.927399966	-2.046254724	0.172341199	-2.625779718	0.154135849	-3.342436258	0.190924757	-1.74952745	0.122495867	15.86198864	2.733674139
1997	4648.670172	63	5022	1354.149863	73	0.263950624	159.5880919	MAGPHPVIVITGPZEE	Kd	69.80990989	7.188056673	9.711930925	6.84E-05	HPVIVITGPZ	42	full	9799.832804	full_calibration2.csv	0.014324614	0.00147495	0.063	0.06980991	0.007188057	3.700876708	-1.200659451	0.235513007	3.962273343	0.927399966	-2.046254724	0.172341199	-2.625779718	0.154135849	-3.342436258	0.190924757	-1.74952745	0.122495867	15.86198864	2.733674139
1998	9721.816397	1000	10879	1983.076466	95	0.189352661	204.53872	MAGPIPRIIITKPZEE	Kd	8.024879715	3.761350734	2.133510082	0.076835938	IPRIIITKPZ	43	full	9799.832804	full_calibration2.csv	0.12461246	0.058407251	1	0.00802488	0.003761351	4.036588977	0	0.090165719	4.040395096	0.8079502	-3.304556721	0.49083148	-3.884081715	0.484739016	-4.600738255	0.497660845	-3.007829447	0.475625158	1.900277255	0.932715898
1999	9208.646556	125	9372	2321.153948	69	0.254831398	281.4812618	MAGPIPRIIITKPZEE	Kd	8.024879715	3.761350734	2.133510082	0.076835938	IPRIIITKPZ	43	full	9799.832804	full_calibration2.csv	0.12461246	0.058407251	0.125	0.00802488	0.003761351	3.97183228	-0.903089987	0.090165719	4.040395096	0.8079502	-3.304556721	0.49083148	-3.884081715	0.484739016	-4.600738255	0.497660845	-3.007829447	0.475625158	1.900277255	0.932715898
2000	9760.668708	2000	10840	2120.654976	59	0.195426123	278.4556402	MAGPIPRIIITKPZEE	Kd	8.024879715	3.761350734	2.133510082	0.076835938	IPRIIITKPZ	43	full	9799.832804	full_calibration2.csv	0.12461246	0.058407251	2	0.00802488	0.003761351	4.035029282	0.301029996	0.090165719	4.040395096	0.8079502	-3.304556721	0.49083148	-3.884081715	0.484739016	-4.600738255	0.497660845	-3.007829447	0.475625158	1.900277255	0.932715898
2001	9495.046383	250	10165	2291.757407	87	0.232353103	247.1265567	MAGPIPRIIITKPZEE	Kd	8.024879715	3.761350734	2.133510082	0.076835938	IPRIIITKPZ	43	full	9799.832804	full_calibration2.csv	0.12461246	0.058407251	0.25	0.00802488	0.003761351	4.007107383	-0.602059991	0.090165719	4.040395096	0.8079502	-3.304556721	0.49083148	-3.884081715	0.484739016	-4.600738255	0.497660845	-3.007829447	0.475625158	1.900277255	0.932715898
2002	7834.992933	32	7411.5	1452.684946	75	0.196543921	168.8711948	MAGPIPRIIITKPZEE	Kd	8.024879715	3.761350734	2.133510082	0.076835938	IPRIIITKPZ	43	full	9799.832804	full_calibration2.csv	0.12461246	0.058407251	0.032	0.00802488	0.003761351	3.869906113	-1.494850022	0.090165719	4.040395096	0.8079502	-3.304556721	0.49083148	-3.884081715	0.484739016	-4.600738255	0.497660845	-3.007829447	0.475625158	1.900277255	0.932715898
2003	9645.032355	500	11033	2102.654244	110	0.199119699	201.3977504	MAGPIPRIIITKPZEE	Kd	8.024879715	3.761350734	2.133510082	0.076835938	IPRIIITKPZ	43	full	9799.832804	full_calibration2.csv	0.12461246	0.058407251	0.5	0.00802488	0.003761351	4.042693618	-0.301029996	0.090165719	4.040395096	0.8079502	-3.304556721	0.49083148	-3.884081715	0.484739016	-4.600738255	0.497660845	-3.007829447	0.475625158	1.900277255	0.932715898
2004	8692.58025	63	8726.75	1785.557216	98	0.207773067	181.2958672	MAGPIPRIIITKPZEE	Kd	8.024879715	3.761350734	2.133510082	0.076835938	IPRIIITKPZ	43	full	9799.832804	full_calibration2.csv	0.12461246	0.058407251	0.063	0.00802488	0.003761351	3.940852535	-1.200659451	0.090165719	4.040395096	0.8079502	-3.304556721	0.49083148	-3.884081715	0.484739016	-4.600738255	0.497660845	-3.007829447	0.475625158	1.900277255	0.932715898
2005	9723.44074	1000	11044.75	2402.428175	124	0.225150133	216.6196535	MAGPIPRIIITKPZEE	Kd	7.856484752	4.12577559	1.904244325	0.105546872	IPRIIITKPZ	44	full	9799.832804	full_calibration2.csv	0.127283388	0.066841942	1	0.007856485	0.004125776	4.04315589	0	0.097105828	4.046621012	0.931304426	-3.304556721	0.49083148	-3.884081715	0.484739016	-4.600738255	0.497660845	-3.007829447	0.475625158	1.900277255	0.932715898
2006	9220.318472	125	9434	2242.710347	103	0.248071043	222.0614139	MAGPIPRIIITKPZEE	Kd	7.856484752	4.12577559	1.904244325	0.105546872	IPRIIITKPZ	44	full	9799.832804	full_calibration2.csv	0.127283388	0.066841942	0.125	0.007856485	0.004125776	3.974695872	-0.903089987	0.097105828	4.046621012	0.931304426	-3.304556721	0.49083148	-3.884081715	0.484739016	-4.600738255	0.497660845	-3.007829447	0.475625158	1.900277255	0.932715898
2007	9761.487316	2000	11594.5	2168.730309	69	0.196068334	262.9971805	MAGPIPRIIITKPZEE	Kd	7.856484752	4.12577559	1.904244325	0.105546872	IPRIIITKPZ	44	full	9799.832804	full_calibration2.csv	0.127283388	0.066841942	2	0.007856485	0.004125776	4.064252025	0.301029996	0.097105828	4.046621012	0.931304426	-3.304556721	0.49083148	-3.884081715	0.484739016	-4.600738255	0.497660845	-3.007829447	0.475625158	1.900277255	0.932715898
2008	9501.247189	250	10114.5	2547.911008	99	0.260531612	257.3778788	MAGPIPRIIITKPZEE	Kd	7.856484752	4.12577559	1.904244325	0.105546872	IPRIIITKPZ	44	full	9799.832804	full_calibration2.csv	0.127283388	0.066841942	0.25	0.007856485	0.004125776	4.004944419	-0.602059991	0.097105828	4.046621012	0.931304426	-3.304556721	0.49083148	-3.884081715	0.484739016	-4.600738255	0.497660845	-3.007829447	0.475625158	1.900277255	0.932715898
2009	7868.096037	32	7507.5	1368.415739	92	0.186723415	143.4489469	MAGPIPRIIITKPZEE	Kd	7.856484752	4.12577559	1.904244325	0.105546872	IPRIIITKPZ	44	full	9799.832804	full_calibration2.csv	0.127283388	0.066841942	0.032	0.007856485	0.004125776	3.875495341	-1.494850022	0.097105828	4.046621012	0.931304426	-3.304556721	0.49083148	-3.884081715	0.484739016	-4.600738255	0.497660845	-3.007829447	0.475625158	1.900277255	0.932715898
2010	9648.230453	500	10387.25	1803.213889	136	0.179032095	155.1959414	MAGPIPRIIITKPZEE	Kd	7.856484752	4.12577559	1.904244325	0.105546872	IPRIIITKPZ	44	full	9799.832804	full_calibration2.csv	0.127283388	0.066841942	0.5	0.007856485	0.004125776	4.016500584	-0.301029996	0.097105828	4.046621012	0.931304426	-3.304556721	0.49083148	-3.884081715	0.484739016	-4.600738255	0.497660845	-3.007829447	0.475625158	1.900277255	0.932715898
2011	8713.238722	63	8697.5	1766.008319	122	0.210326516	160.5462108	MAGPIPRIIITKPZEE	Kd	7.856484752	4.12577559	1.904244325	0.105546872	IPRIIITKPZ	44	full	9799.832804	full_calibration2.csv	0.127283388	0.066841942	0.063	0.007856485	0.004125776	3.939394437	-1.200659451	0.097105828	4.046621012	0.931304426	-3.304556721	0.49083148	-3.884081715	0.484739016	-4.600738255	0.497660845	-3.007829447	0.475625158	1.900277255	0.932715898
2012	9665.350285	1000	10101.5	2113.125181	115	0.212860104	197.9123062	MAGPIPKIIVTAPZEE	Kd	13.91387949	2.078333631	6.694728547	0.000538827	IPKIIVTAPZ	45	full	9799.832804	full_calibration2.csv	0.071870681	0.010735414	1	0.013913879	0.002078334	4.004385868	0	0.096250066	4.008143157	0.86205093	-2.978204991	0.208655592	-3.557729984	0.193890503	-4.274386525	0.224249705	-2.681477717	0.169826101	3.294781936	0.687474675
2013	8818.262833	125	8872	1506.924727	111	0.169201604	143.6796352	MAGPIPKIIVTAPZEE	Kd	13.91387949	2.078333631	6.694728547	0.000538827	IPKIIVTAPZ	45	full	9799.832804	full_calibration2.csv	0.071870681	0.010735414	0.125	0.013913879	0.002078334	3.948021533	-0.903089987	0.096250066	4.008143157	0.86205093	-2.978204991	0.208655592	-3.557729984	0.193890503	-4.274386525	0.224249705	-2.681477717	0.169826101	3.294781936	0.687474675
2014	9732.126983	2000	10597.75	2194.843717	90	0.214376494	232.6529686	MAGPIPKIIVTAPZEE	Kd	13.91387949	2.078333631	6.694728547	0.000538827	IPKIIVTAPZ	45	full	9799.832804	full_calibration2.csv	0.071870681	0.010735414	2	0.013913879	0.002078334	4.02521367	0.301029996	0.096250066	4.008143157	0.86205093	-2.978204991	0.208655592	-3.557729984	0.193890503	-4.274386525	0.224249705	-2.681477717	0.169826101	3.294781936	0.687474675
2015	9283.173002	250	9296.5	2306.862464	115	0.252281787	216.0574653	MAGPIPKIIVTAPZEE	Kd	13.91387949	2.078333631	6.694728547	0.000538827	IPKIIVTAPZ	45	full	9799.832804	full_calibration2.csv	0.071870681	0.010735414	0.25	0.013913879	0.002078334	3.968319474	-0.602059991	0.096250066	4.008143157	0.86205093	-2.978204991	0.208655592	-3.557729984	0.193890503	-4.274386525	0.224249705	-2.681477717	0.169826101	3.294781936	0.687474675
2016	6830.062134	32	6701.5	1515.631183	121	0.235759893	138.3575646	MAGPIPKIIVTAPZEE	Kd	13.91387949	2.078333631	6.694728547	0.000538827	IPKIIVTAPZ	45	full	9799.832804	full_calibration2.csv	0.071870681	0.010735414	0.032	0.013913879	0.002078334	3.826172022	-1.494850022	0.096250066	4.008143157	0.86205093	-2.978204991	0.208655592	-3.557729984	0.193890503	-4.274386525	0.224249705	-2.681477717	0.169826101	3.294781936	0.687474675
2017	9534.508791	500	9347	1927.07782	109	0.21135629	185.4331497	MAGPIPKIIVTAPZEE	Kd	13.91387949	2.078333631	6.694728547	0.000538827	IPKIIVTAPZ	45	full	9799.832804	full_calibration2.csv	0.071870681	0.010735414	0.5	0.013913879	0.002078334	3.970672243	-0.301029996	0.096250066	4.008143157	0.86205093	-2.978204991	0.208655592	-3.557729984	0.193890503	-4.274386525	0.224249705	-2.681477717	0.169826101	3.294781936	0.687474675
2018	8027.02283	63	8126.5	1492.250749	105	0.188173493	146.3272247	MAGPIPKIIVTAPZEE	Kd	13.91387949	2.078333631	6.694728547	0.000538827	IPKIIVTAPZ	45	full	9799.832804	full_calibration2.csv	0.071870681	0.010735414	0.063	0.013913879	0.002078334	3.90990354	-1.200659451	0.096250066	4.008143157	0.86205093	-2.978204991	0.208655592	-3.557729984	0.193890503	-4.274386525	0.224249705	-2.681477717	0.169826101	3.294781936	0.687474675
2019	9665.916992	1000	10045.25	2122.286341	94	0.216291697	220.0708418	MAGPIPKIIVTAPZEE	Kd	13.85443426	1.62165121	8.543411907	0.000141048	IPKIIVTAPZ	46	full	9799.832804	full_calibration2.csv	0.072179057	0.008448505	1	0.013854434	0.001621651	4.00196075	0	0.093130951	4.006662698	0.744157798	-2.978204991	0.208655592	-3.557729984	0.193890503	-4.274386525	0.224249705	-2.681477717	0.169826101	3.294781936	0.687474675
2020	8822.038036	125	9147	1536.503904	119	0.173473696	141.4466494	MAGPIPKIIVTAPZEE	Kd	13.85443426	1.62165121	8.543411907	0.000141048	IPKIIVTAPZ	46	full	9799.832804	full_calibration2.csv	0.072179057	0.008448505	0.125	0.013854434	0.001621651	3.961278679	-0.903089987	0.093130951	4.006662698	0.744157798	-2.978204991	0.208655592	-3.557729984	0.193890503	-4.274386525	0.224249705	-2.681477717	0.169826101	3.294781936	0.687474675
2021	9732.414257	2000	10200.75	3031.323906	88	0.286144511	324.9920357	MAGPIPKIIVTAPZEE	Kd	13.85443426	1.62165121	8.543411907	0.000141048	IPKIIVTAPZ	46	full	9799.832804	full_calibration2.csv	0.072179057	0.008448505	2	0.013854434	0.001621651	4.008632104	0.301029996	0.093130951	4.006662698	0.744157798	-2.978204991	0.208655592	-3.557729984	0.193890503	-4.274386525	0.224249705	-2.681477717	0.169826101	3.294781936	0.687474675
2022	9285.26446	250	9438	2239.22857	129	0.250812374	197.9217133	MAGPIPKIIVTAPZEE	Kd	13.85443426	1.62165121	8.543411907	0.000141048	IPKIIVTAPZ	46	full	9799.832804	full_calibration2.csv	0.072179057	0.008448505	0.25	0.013854434	0.001621651	3.974879973	-0.602059991	0.093130951	4.006662698	0.744157798	-2.978204991	0.208655592	-3.557729984	0.193890503	-4.274386525	0.224249705	-2.681477717	0.169826101	3.294781936	0.687474675
2023	6838.916559	32	6523	1439.81234	125	0.231220125	129.2989651	MAGPIPKIIVTAPZEE	Kd	13.85443426	1.62165121	8.543411907	0.000141048	IPKIIVTAPZ	46	full	9799.832804	full_calibration2.csv	0.072179057	0.008448505	0.032	0.013854434	0.001621651	3.814447379	-1.494850022	0.093130951	4.006662698	0.744157798	-2.978204991	0.208655592	-3.557729984	0.193890503	-4.274386525	0.224249705	-2.681477717	0.169826101	3.294781936	0.687474675
2024	9535.611791	500	9596.5	1728.037543	137	0.181917209	148.1779968	MAGPIPKIIVTAPZEE	Kd	13.85443426	1.62165121	8.543411907	0.000141048	IPKIIVTAPZ	46	full	9799.832804	full_calibration2.csv	0.072179057	0.008448505	0.5	0.013854434	0.001621651	3.982112868	-0.301029996	0.093130951	4.006662698	0.744157798	-2.978204991	0.208655592	-3.557729984	0.193890503	-4.274386525	0.224249705	-2.681477717	0.169826101	3.294781936	0.687474675
2025	8033.231558	63	8168	1642.482738	109	0.217022988	158.0479751	MAGPIPKIIVTAPZEE	Kd	13.85443426	1.62165121	8.543411907	0.000141048	IPKIIVTAPZ	46	full	9799.832804	full_calibration2.csv	0.072179057	0.008448505	0.063	0.013854434	0.001621651	3.912115729	-1.200659451	0.093130951	4.006662698	0.744157798	-2.978204991	0.208655592	-3.557729984	0.193890503	-4.274386525	0.224249705	-2.681477717	0.169826101	3.294781936	0.687474675
2026	9711.98428	1000	10720.5	2838.595743	101	0.259298019	283.8595743	MAGPVPRIIITKPZEE	Kd	9.045373394	3.086021851	2.931078855	0.026250226	VPRIIITKPZ	47	full	9799.832804	full_calibration2.csv	0.110553756	0.037717769	1	0.009045373	0.003086022	4.030215041	0	0.088268521	4.031037246	0.777094684	-3.233570637	0.37097607	-3.81309563	0.36287686	-4.52975217	0.379965812	-2.936843362	0.350609459	2.141928345	0.794604159
2027	9138.540701	125	9513.5	1572.487964	96	0.16783163	161.333861	MAGPVPRIIITKPZEE	Kd	9.045373394	3.086021851	2.931078855	0.026250226	VPRIIITKPZ	47	full	9799.832804	full_calibration2.csv	0.110553756	0.037717769	0.125	0.009045373	0.003086022	3.978340323	-0.903089987	0.088268521	4.031037246	0.777094684	-3.233570637	0.37097607	-3.81309563	0.36287686	-4.52975217	0.379965812	-2.936843362	0.350609459	2.141928345	0.794604159
2028	9755.710781	2000	10769	3215.850018	83	0.301528796	355.1312251	MAGPVPRIIITKPZEE	Kd	9.045373394	3.086021851	2.931078855	0.026250226	VPRIIITKPZ	47	full	9799.832804	full_calibration2.csv	0.110553756	0.037717769	2	0.009045373	0.003086022	4.032175377	0.301029996	0.088268521	4.031037246	0.777094684	-3.233570637	0.37097607	-3.81309563	0.36287686	-4.52975217	0.379965812	-2.936843362	0.350609459	2.141928345	0.794604159
2029	9457.641219	250	10076.25	2817.734876	96	0.275798992	289.0934985	MAGPVPRIIITKPZEE	Kd	9.045373394	3.086021851	2.931078855	0.026250226	VPRIIITKPZ	47	full	9799.832804	full_calibration2.csv	0.110553756	0.037717769	0.25	0.009045373	0.003086022	4.003298934	-0.602059991	0.088268521	4.031037246	0.777094684	-3.233570637	0.37097607	-3.81309563	0.36287686	-4.52975217	0.379965812	-2.936843362	0.350609459	2.141928345	0.794604159
2030	7640.194833	32	7126.5	1753.289769	86	0.243522693	190.1709761	MAGPVPRIIITKPZEE	Kd	9.045373394	3.086021851	2.931078855	0.026250226	VPRIIITKPZ	47	full	9799.832804	full_calibration2.csv	0.110553756	0.037717769	0.032	0.009045373	0.003086022	3.852876289	-1.494850022	0.088268521	4.031037246	0.777094684	-3.233570637	0.37097607	-3.81309563	0.36287686	-4.52975217	0.379965812	-2.936843362	0.350609459	2.141928345	0.794604159
2031	9625.696761	500	10164	2700.346997	113	0.271991959	255.1588074	MAGPVPRIIITKPZEE	Kd	9.045373394	3.086021851	2.931078855	0.026250226	VPRIIITKPZ	47	full	9799.832804	full_calibration2.csv	0.110553756	0.037717769	0.5	0.009045373	0.003086022	4.007064656	-0.301029996	0.088268521	4.031037246	0.777094684	-3.233570637	0.37097607	-3.81309563	0.36287686	-4.52975217	0.379965812	-2.936843362	0.350609459	2.141928345	0.794604159
2032	8569.453354	63	8760	1637.84073	91	0.193521652	172.6435717	MAGPVPRIIITKPZEE	Kd	9.045373394	3.086021851	2.931078855	0.026250226	VPRIIITKPZ	47	full	9799.832804	full_calibration2.csv	0.110553756	0.037717769	0.063	0.009045373	0.003086022	3.942504106	-1.200659451	0.088268521	4.031037246	0.777094684	-3.233570637	0.37097607	-3.81309563	0.36287686	-4.52975217	0.379965812	-2.936843362	0.350609459	2.141928345	0.794604159
2033	9729.548186	1000	11109.75	4098.915787	140	0.34055829	347.6654994	MAGPVPRIIITKPZEE	Kd	7.223831607	3.289754146	2.195857589	0.070503408	VPRIIITKPZ	48	full	9799.832804	full_calibration2.csv	0.138430691	0.063041743	1	0.007223832	0.003289754	4.045704286	0	0.082356179	4.035963194	0.81656668	-3.233570637	0.37097607	-3.81309563	0.36287686	-4.52975217	0.379965812	-2.936843362	0.350609459	2.141928345	0.794604159
2034	9264.435054	125	9623	3668.483928	119	0.36612921	337.7113191	MAGPVPRIIITKPZEE	Kd	7.223831607	3.289754146	2.195857589	0.070503408	VPRIIITKPZ	48	full	9799.832804	full_calibration2.csv	0.138430691	0.063041743	0.125	0.007223832	0.003289754	3.983310486	-0.903089987	0.082356179	4.035963194	0.81656668	-3.233570637	0.37097607	-3.81309563	0.36287686	-4.52975217	0.379965812	-2.936843362	0.350609459	2.141928345	0.794604159
2035	9764.564021	2000	10906	5251.734763	89	0.434173009	559.8368068	MAGPVPRIIITKPZEE	Kd	7.223831607	3.289754146	2.195857589	0.070503408	VPRIIITKPZ	48	full	9799.832804	full_calibration2.csv	0.138430691	0.063041743	2	0.007223832	0.003289754	4.037665493	0.301029996	0.082356179	4.035963194	0.81656668	-3.233570637	0.37097607	-3.81309563	0.36287686	-4.52975217	0.379965812	-2.936843362	0.350609459	2.141928345	0.794604159
2036	9524.615918	250	10114	2384.651909	94	0.22605068	247.2768839	MAGPVPRIIITKPZEE	Kd	7.223831607	3.289754146	2.195857589	0.070503408	VPRIIITKPZ	48	full	9799.832804	full_calibration2.csv	0.138430691	0.063041743	0.25	0.007223832	0.003289754	4.004922949	-0.602059991	0.082356179	4.035963194	0.81656668	-3.233570637	0.37097607	-3.81309563	0.36287686	-4.52975217	0.379965812	-2.936843362	0.350609459	2.141928345	0.794604159
2037	7995.002958	32	7518.5	1733.279749	121	0.233533747	158.2260695	MAGPVPRIIITKPZEE	Kd	7.223831607	3.289754146	2.195857589	0.070503408	VPRIIITKPZ	48	full	9799.832804	full_calibration2.csv	0.138430691	0.063041743	0.032	0.007223832	0.003289754	3.876131204	-1.494850022	0.082356179	4.035963194	0.81656668	-3.233570637	0.37097607	-3.81309563	0.36287686	-4.52975217	0.379965812	-2.936843362	0.350609459	2.141928345	0.794604159
2038	9660.264555	500	10120	3165.060197	137	0.30221163	271.4016728	MAGPVPRIIITKPZEE	Kd	7.223831607	3.289754146	2.195857589	0.070503408	VPRIIITKPZ	48	full	9799.832804	full_calibration2.csv	0.138430691	0.063041743	0.5	0.007223832	0.003289754	4.005180513	-0.301029996	0.082356179	4.035963194	0.81656668	-3.233570637	0.37097607	-3.81309563	0.36287686	-4.52975217	0.379965812	-2.936843362	0.350609459	2.141928345	0.794604159
2039	8791.737114	63	8971.75	2304.600919	112	0.253883447	218.743039	MAGPVPRIIITKPZEE	Kd	7.223831607	3.289754146	2.195857589	0.070503408	VPRIIITKPZ	48	full	9799.832804	full_calibration2.csv	0.138430691	0.063041743	0.063	0.007223832	0.003289754	3.952877163	-1.200659451	0.082356179	4.035963194	0.81656668	-3.233570637	0.37097607	-3.81309563	0.36287686	-4.52975217	0.379965812	-2.936843362	0.350609459	2.141928345	0.794604159
2040	9567.318729	1000	9784	1522.731574	72	0.160793422	180.7149902	MAGPIPKIIITYPZEE	Kd	24.30295067	2.686241483	9.047195056	0.000102212	IPKIIITYPZ	51	full	9799.832804	full_calibration2.csv	0.041147267	0.004548069	1	0.024302951	0.002686241	3.990516444	0	0.111603973	3.975571328	0.798669721	-2.647482425	0.182873169	-3.227007419	0.165828125	-3.943663959	0.200482842	-2.350755151	0.136917291	5.754895529	1.052415982
2041	8204.654329	125	7783.5	1608.929647	82	0.217549662	178.7699607	MAGPIPKIIITYPZEE	Kd	24.30295067	2.686241483	9.047195056	0.000102212	IPKIIITYPZ	51	full	9799.832804	full_calibration2.csv	0.041147267	0.004548069	0.125	0.024302951	0.002686241	3.89117493	-0.903089987	0.111603973	3.975571328	0.798669721	-2.647482425	0.182873169	-3.227007419	0.165828125	-3.943663959	0.200482842	-2.350755151	0.136917291	5.754895529	1.052415982
2042	9682.180032	2000	9386	2050.515883	87	0.224895799	221.1128142	MAGPIPKIIITYPZEE	Kd	24.30295067	2.686241483	9.047195056	0.000102212	IPKIIITYPZ	51	full	9799.832804	full_calibration2.csv	0.041147267	0.004548069	2	0.024302951	0.002686241	3.97248055	0.301029996	0.111603973	3.975571328	0.798669721	-2.647482425	0.182873169	-3.227007419	0.165828125	-3.943663959	0.200482842	-2.350755151	0.136917291	5.754895529	1.052415982
2043	8931.578005	250	8674.75	1346.311773	74	0.157182018	157.5738744	MAGPIPKIIITYPZEE	Kd	24.30295067	2.686241483	9.047195056	0.000102212	IPKIIITYPZ	51	full	9799.832804	full_calibration2.csv	0.041147267	0.004548069	0.25	0.024302951	0.002686241	3.938256968	-0.602059991	0.111603973	3.975571328	0.798669721	-2.647482425	0.182873169	-3.227007419	0.165828125	-3.943663959	0.200482842	-2.350755151	0.136917291	5.754895529	1.052415982
2044	5569.772916	32	5706.5	1011.095548	74	0.185203191	118.3397828	MAGPIPKIIITYPZEE	Kd	24.30295067	2.686241483	9.047195056	0.000102212	IPKIIITYPZ	51	full	9799.832804	full_calibration2.csv	0.041147267	0.004548069	0.032	0.024302951	0.002686241	3.756369822	-1.494850022	0.111603973	3.975571328	0.798669721	-2.647482425	0.182873169	-3.227007419	0.165828125	-3.943663959	0.200482842	-2.350755151	0.136917291	5.754895529	1.052415982
2045	9345.58235	500	8726.5	1774.860975	116	0.213841004	165.5066393	MAGPIPKIIITYPZEE	Kd	24.30295067	2.686241483	9.047195056	0.000102212	IPKIIITYPZ	51	full	9799.832804	full_calibration2.csv	0.041147267	0.004548069	0.5	0.024302951	0.002686241	3.940840093	-0.301029996	0.111603973	3.975571328	0.798669721	-2.647482425	0.182873169	-3.227007419	0.165828125	-3.943663959	0.200482842	-2.350755151	0.136917291	5.754895529	1.052415982
2046	7071.80527	63	7422.5	1151.72515	96	0.162091862	118.1645071	MAGPIPKIIITYPZEE	Kd	24.30295067	2.686241483	9.047195056	0.000102212	IPKIIITYPZ	51	full	9799.832804	full_calibration2.csv	0.041147267	0.004548069	0.063	0.024302951	0.002686241	3.870550206	-1.200659451	0.111603973	3.975571328	0.798669721	-2.647482425	0.182873169	-3.227007419	0.165828125	-3.943663959	0.200482842	-2.350755151	0.136917291	5.754895529	1.052415982
2047	9531.787806	1000	9505.5	1466.265863	101	0.158812029	146.6265863	MAGPIPKIIITYPZEE	Kd	28.12116712	3.881506996	7.244909553	0.000351193	IPKIIITYPZ	52	full	9799.832804	full_calibration2.csv	0.035560402	0.004908329	1	0.028121167	0.003881507	3.977974966	0	0.116671265	3.966478185	0.888427398	-2.647482425	0.182873169	-3.227007419	0.165828125	-3.943663959	0.200482842	-2.350755151	0.136917291	5.754895529	1.052415982
2048	8000.063763	125	7612.5	1832.656324	71	0.253998487	219.044327	MAGPIPKIIITYPZEE	Kd	28.12116712	3.881506996	7.244909553	0.000351193	IPKIIITYPZ	52	full	9799.832804	full_calibration2.csv	0.035560402	0.004908329	0.125	0.028121167	0.003881507	3.881527306	-0.903089987	0.116671265	3.966478185	0.888427398	-2.647482425	0.182873169	-3.227007419	0.165828125	-3.943663959	0.200482842	-2.350755151	0.136917291	5.754895529	1.052415982
2049	9663.951999	2000	9495	1565.086502	88	0.171279247	167.7948857	MAGPIPKIIITYPZEE	Kd	28.12116712	3.881506996	7.244909553	0.000351193	IPKIIITYPZ	52	full	9799.832804	full_calibration2.csv	0.035560402	0.004908329	2	0.028121167	0.003881507	3.977494969	0.301029996	0.116671265	3.966478185	0.888427398	-2.647482425	0.182873169	-3.227007419	0.165828125	-3.943663959	0.200482842	-2.350755151	0.136917291	5.754895529	1.052415982
2050	8808.959873	250	8399.5	1832.536767	90	0.232510348	194.2485088	MAGPIPKIIITYPZEE	Kd	28.12116712	3.881506996	7.244909553	0.000351193	IPKIIITYPZ	52	full	9799.832804	full_calibration2.csv	0.035560402	0.004908329	0.25	0.028121167	0.003881507	3.924253434	-0.602059991	0.116671265	3.966478185	0.888427398	-2.647482425	0.182873169	-3.227007419	0.165828125	-3.943663959	0.200482842	-2.350755151	0.136917291	5.754895529	1.052415982
2051	5216.043945	32	5703.5	958.8932046	92	0.173064024	100.5193206	MAGPIPKIIITYPZEE	Kd	28.12116712	3.881506996	7.244909553	0.000351193	IPKIIITYPZ	52	full	9799.832804	full_calibration2.csv	0.035560402	0.004908329	0.032	0.028121167	0.003881507	3.756141446	-1.494850022	0.116671265	3.966478185	0.888427398	-2.647482425	0.182873169	-3.227007419	0.165828125	-3.943663959	0.200482842	-2.350755151	0.136917291	5.754895529	1.052415982
2052	9278.015552	500	8300.5	1873.584996	138	0.230859548	160.0711689	MAGPIPKIIITYPZEE	Kd	28.12116712	3.881506996	7.244909553	0.000351193	IPKIIITYPZ	52	full	9799.832804	full_calibration2.csv	0.035560402	0.004908329	0.5	0.028121167	0.003881507	3.919104254	-0.301029996	0.116671265	3.966478185	0.888427398	-2.647482425	0.182873169	-3.227007419	0.165828125	-3.943663959	0.200482842	-2.350755151	0.136917291	5.754895529	1.052415982
2053	6775.478038	63	6898.5	940.4716558	111	0.140701218	89.670454	MAGPIPKIIITYPZEE	Kd	28.12116712	3.881506996	7.244909553	0.000351193	IPKIIITYPZ	52	full	9799.832804	full_calibration2.csv	0.035560402	0.004908329	0.063	0.028121167	0.003881507	3.838754669	-1.200659451	0.116671265	3.966478185	0.888427398	-2.647482425	0.182873169	-3.227007419	0.165828125	-3.943663959	0.200482842	-2.350755151	0.136917291	5.754895529	1.052415982
2054	4297.794988	1000	4433	1156.103171	110	0.260307914	110.7346006	KRMEPIAIIITDTEIS	Kd	1280.200157	103.4440778	12.3757704	1.70E-05	PIAIIITDTEIS	53	full	9799.832804	full_calibration2.csv	0.000781128	6.31E-05	1	1.280200157	0.103444078	3.646697731	0	0.727103682	3.633928643	0.952665102	-0.296727274	0.166596871	-0.876252268	0.147685099	-1.592908808	0.185756	0	0.11427277	303.1491221	50.50369511
2055	871.7470566	125	1195.5	548.892222	61	0.575437829	70.86168115	KRMEPIAIIITDTEIS	Kd	1280.200157	103.4440778	12.3757704	1.70E-05	PIAIIITDTEIS	53	full	9799.832804	full_calibration2.csv	0.000781128	6.31E-05	0.125	1.280200157	0.103444078	3.07754958	-0.903089987	0.727103682	3.633928643	0.952665102	-0.296727274	0.166596871	-0.876252268	0.147685099	-1.592908808	0.185756	0	0.11427277	303.1491221	50.50369511
2056	5975.143184	2000	5341	1343.996321	75	0.275350401	156.2363988	KRMEPIAIIITDTEIS	Kd	1280.200157	103.4440778	12.3757704	1.70E-05	PIAIIITDTEIS	53	full	9799.832804	full_calibration2.csv	0.000781128	6.31E-05	2	1.280200157	0.103444078	3.727622578	0.301029996	0.727103682	3.633928643	0.952665102	-0.296727274	0.166596871	-0.876252268	0.147685099	-1.592908808	0.185756	0	0.11427277	303.1491221	50.50369511
2057	1601.070416	250	1959.25	1214.381744	98	0.728844725	123.3017847	KRMEPIAIIITDTEIS	Kd	1280.200157	103.4440778	12.3757704	1.70E-05	PIAIIITDTEIS	53	full	9799.832804	full_calibration2.csv	0.000781128	6.31E-05	0.25	1.280200157	0.103444078	3.292089855	-0.602059991	0.727103682	3.633928643	0.952665102	-0.296727274	0.166596871	-0.876252268	0.147685099	-1.592908808	0.185756	0	0.11427277	303.1491221	50.50369511
2058	238.9838533	32	261.75	393.4310337	84	6.838739127	43.18466627	KRMEPIAIIITDTEIS	Kd	1280.200157	103.4440778	12.3757704	1.70E-05	PIAIIITDTEIS	53	full	9799.832804	full_calibration2.csv	0.000781128	6.31E-05	0.032	1.280200157	0.103444078	2.41788669	-1.494850022	0.727103682	3.633928643	0.952665102	-0.296727274	0.166596871	-0.876252268	0.147685099	-1.592908808	0.185756	0	0.11427277	303.1491221	50.50369511
2059	2752.452517	500	2936	883.5469017	77	0.305684361	101.3497804	KRMEPIAIIITDTEIS	Kd	1280.200157	103.4440778	12.3757704	1.70E-05	PIAIIITDTEIS	53	full	9799.832804	full_calibration2.csv	0.000781128	6.31E-05	0.5	1.280200157	0.103444078	3.467756051	-0.301029996	0.727103682	3.633928643	0.952665102	-0.296727274	0.166596871	-0.876252268	0.147685099	-1.592908808	0.185756	0	0.11427277	303.1491221	50.50369511
2060	459.6407048	63	567	278.2975373	64	0.779783827	35.06219401	KRMEPIAIIITDTEIS	Kd	1280.200157	103.4440778	12.3757704	1.70E-05	PIAIIITDTEIS	53	full	9799.832804	full_calibration2.csv	0.000781128	6.31E-05	0.063	1.280200157	0.103444078	2.753583059	-1.200659451	0.727103682	3.633928643	0.952665102	-0.296727274	0.166596871	-0.876252268	0.147685099	-1.592908808	0.185756	0	0.11427277	303.1491221	50.50369511
2061	4472.598622	1000	4528.75	1354.322334	114	0.318383809	127.4039282	KRMEPIAIIITDTEIS	Kd	1191.082552	96.73804384	12.31245232	1.75E-05	PIAIIITDTEIS	54	full	9799.832804	full_calibration2.csv	0.000839572	6.82E-05	1	1.191082552	0.096738044	3.655978347	0	0.739991468	3.653165428	0.944859634	-0.296727274	0.166596871	-0.876252268	0.147685099	-1.592908808	0.185756	0	0.11427277	303.1491221	50.50369511
2062	930.7767956	125	1205	606.9586457	63	0.609401087	77.08382508	KRMEPIAIIITDTEIS	Kd	1191.082552	96.73804384	12.31245232	1.75E-05	PIAIIITDTEIS	54	full	9799.832804	full_calibration2.csv	0.000839572	6.82E-05	0.125	1.191082552	0.096738044	3.080987047	-0.903089987	0.739991468	3.653165428	0.944859634	-0.296727274	0.166596871	-0.876252268	0.147685099	-1.592908808	0.185756	0	0.11427277	303.1491221	50.50369511
2063	6142.011461	2000	5534.75	1335.835818	78	0.25728733	152.2326199	KRMEPIAIIITDTEIS	Kd	1191.082552	96.73804384	12.31245232	1.75E-05	PIAIIITDTEIS	54	full	9799.832804	full_calibration2.csv	0.000839572	6.82E-05	2	1.191082552	0.096738044	3.743098009	0.301029996	0.739991468	3.653165428	0.944859634	-0.296727274	0.166596871	-0.876252268	0.147685099	-1.592908808	0.185756	0	0.11427277	303.1491221	50.50369511
2064	1700.081787	250	2203.25	646.8878827	102	0.31649046	64.36775012	KRMEPIAIIITDTEIS	Kd	1191.082552	96.73804384	12.31245232	1.75E-05	PIAIIITDTEIS	54	full	9799.832804	full_calibration2.csv	0.000839572	6.82E-05	0.25	1.191082552	0.096738044	3.343063779	-0.602059991	0.739991468	3.653165428	0.944859634	-0.296727274	0.166596871	-0.876252268	0.147685099	-1.592908808	0.185756	0	0.11427277	303.1491221	50.50369511
2065	256.3969613	32	258.75	328.8211992	82	4.981679138	36.5356888	KRMEPIAIIITDTEIS	Kd	1191.082552	96.73804384	12.31245232	1.75E-05	PIAIIITDTEIS	54	full	9799.832804	full_calibration2.csv	0.000839572	6.82E-05	0.032	1.191082552	0.096738044	2.412880358	-1.494850022	0.739991468	3.653165428	0.944859634	-0.296727274	0.166596871	-0.876252268	0.147685099	-1.592908808	0.185756	0	0.11427277	303.1491221	50.50369511
2066	2897.502784	500	3038.25	854.5255508	78	0.301642977	97.38222437	KRMEPIAIIITDTEIS	Kd	1191.082552	96.73804384	12.31245232	1.75E-05	PIAIIITDTEIS	54	full	9799.832804	full_calibration2.csv	0.000839572	6.82E-05	0.5	1.191082552	0.096738044	3.482623507	-0.301029996	0.739991468	3.653165428	0.944859634	-0.296727274	0.166596871	-0.876252268	0.147685099	-1.592908808	0.185756	0	0.11427277	303.1491221	50.50369511
2067	492.303689	63	556	438.5733145	77	1.236820437	50.3078094	KRMEPIAIIITDTEIS	Kd	1191.082552	96.73804384	12.31245232	1.75E-05	PIAIIITDTEIS	54	full	9799.832804	full_calibration2.csv	0.000839572	6.82E-05	0.063	1.191082552	0.096738044	2.745074792	-1.200659451	0.739991468	3.653165428	0.944859634	-0.296727274	0.166596871	-0.876252268	0.147685099	-1.592908808	0.185756	0	0.11427277	303.1491221	50.50369511
2068	511.2661003	1000	571	1081.291232	72	2.756686746	128.3256602	KRMEPIPIIITDTEIS	Kd	18167.77349	2274.454578	7.987749533	0.000205202	PIPIIITDTEIS	55	full	9799.832804	full_calibration2.csv	5.50E-05	6.89E-06	1	18.16777349	2.274454578	2.756636108	0	0.451670251	2.752415165	0.971043639	1.276284035	0.192089427	0.696759041	0.175939533	-0.019897499	0.208923723	1.573011309	0.149003679	4302.096476	826.3872465
2069	66.96519263	125	191	101.8527917	71	4.840393714	12.17373706	KRMEPIPIIITDTEIS	Kd	18167.77349	2274.454578	7.987749533	0.000205202	PIPIIITDTEIS	55	full	9799.832804	full_calibration2.csv	5.50E-05	6.89E-06	0.125	18.16777349	2.274454578	2.281033367	-0.903089987	0.451670251	2.752415165	0.971043639	1.276284035	0.192089427	0.696759041	0.175939533	-0.019897499	0.208923723	1.573011309	0.149003679	4302.096476	826.3872465
2070	971.8309072	2000	860	812.6031336	79	1.178420728	92.00918661	KRMEPIPIIITDTEIS	Kd	18167.77349	2274.454578	7.987749533	0.000205202	PIPIIITDTEIS	55	full	9799.832804	full_calibration2.csv	5.50E-05	6.89E-06	2	18.16777349	2.274454578	2.934498451	0.301029996	0.451670251	2.752415165	0.971043639	1.276284035	0.192089427	0.696759041	0.175939533	-0.019897499	0.208923723	1.573011309	0.149003679	4302.096476	826.3872465
2071	133.0214101	250	275.75	200.9815349	76	1.913390537	23.20734866	KRMEPIPIIITDTEIS	Kd	18167.77349	2274.454578	7.987749533	0.000205202	PIPIIITDTEIS	55	full	9799.832804	full_calibration2.csv	5.50E-05	6.89E-06	0.25	18.16777349	2.274454578	2.440515521	-0.602059991	0.451670251	2.752415165	0.971043639	1.276284035	0.192089427	0.696759041	0.175939533	-0.019897499	0.208923723	1.573011309	0.149003679	4302.096476	826.3872465
2072	17.23068971	32	140	44.69218767	83	-1.621972705	4.935426488	KRMEPIPIIITDTEIS	Kd	18167.77349	2274.454578	7.987749533	0.000205202	PIPIIITDTEIS	55	full	9799.832804	full_calibration2.csv	5.50E-05	6.89E-06	0.032	18.16777349	2.274454578	2.146128036	-1.494850022	0.451670251	2.752415165	0.971043639	1.276284035	0.192089427	0.696759041	0.175939533	-0.019897499	0.208923723	1.573011309	0.149003679	4302.096476	826.3872465
2073	262.479958	500	401.75	400.3132949	60	1.895497589	52.11635192	KRMEPIPIIITDTEIS	Kd	18167.77349	2274.454578	7.987749533	0.000205202	PIPIIITDTEIS	55	full	9799.832804	full_calibration2.csv	5.50E-05	6.89E-06	0.5	18.16777349	2.274454578	2.603955885	-0.301029996	0.451670251	2.752415165	0.971043639	1.276284035	0.192089427	0.696759041	0.175939533	-0.019897499	0.208923723	1.573011309	0.149003679	4302.096476	826.3872465
2074	33.86523709	63	161	121.8466693	77	-7.652686406	13.97677152	KRMEPIPIIITDTEIS	Kd	18167.77349	2274.454578	7.987749533	0.000205202	PIPIIITDTEIS	55	full	9799.832804	full_calibration2.csv	5.50E-05	6.89E-06	0.063	18.16777349	2.274454578	2.206825876	-1.200659451	0.451670251	2.752415165	0.971043639	1.276284035	0.192089427	0.696759041	0.175939533	-0.019897499	0.208923723	1.573011309	0.149003679	4302.096476	826.3872465
2075	467.6443738	1000	551	324.6353073	61	0.698978283	41.91023796	KRMEPIPIIITDTEIS	Kd	19955.73763	2763.671052	7.220735485	0.000357659	PIPIIITDTEIS	56	full	9799.832804	full_calibration2.csv	5.01E-05	6.94E-06	1	19.95573763	2.763671052	2.741151599	0	0.4223923	2.718285431	0.961985624	1.276284035	0.192089427	0.696759041	0.175939533	-0.019897499	0.208923723	1.573011309	0.149003679	4302.096476	826.3872465
2076	61.00269436	125	184.5	141.6406102	84	8.89555982	15.54707677	KRMEPIPIIITDTEIS	Kd	19955.73763	2763.671052	7.220735485	0.000357659	PIPIIITDTEIS	56	full	9799.832804	full_calibration2.csv	5.01E-05	6.94E-06	0.125	19.95573763	2.763671052	2.26599637	-0.903089987	0.4223923	2.718285431	0.961985624	1.276284035	0.192089427	0.696759041	0.175939533	-0.019897499	0.208923723	1.573011309	0.149003679	4302.096476	826.3872465
2077	892.689917	2000	773.75	412.8009347	52	0.729826214	57.80369275	KRMEPIPIIITDTEIS	Kd	19955.73763	2763.671052	7.220735485	0.000357659	PIPIIITDTEIS	56	full	9799.832804	full_calibration2.csv	5.01E-05	6.94E-06	2	19.95573763	2.763671052	2.888600662	0.301029996	0.4223923	2.718285431	0.961985624	1.276284035	0.192089427	0.696759041	0.175939533	-0.019897499	0.208923723	1.573011309	0.149003679	4302.096476	826.3872465
2078	121.2506193	250	273	153.360858	80	1.511223581	17.25444458	KRMEPIPIIITDTEIS	Kd	19955.73763	2763.671052	7.220735485	0.000357659	PIPIIITDTEIS	56	full	9799.832804	full_calibration2.csv	5.01E-05	6.94E-06	0.25	19.95573763	2.763671052	2.436162647	-0.602059991	0.4223923	2.718285431	0.961985624	1.276284035	0.192089427	0.696759041	0.175939533	-0.019897499	0.208923723	1.573011309	0.149003679	4302.096476	826.3872465
2079	15.68935191	32	144	21.39241818	75	-1.020306113	2.4868181	KRMEPIPIIITDTEIS	Kd	19955.73763	2763.671052	7.220735485	0.000357659	PIPIIITDTEIS	56	full	9799.832804	full_calibration2.csv	5.01E-05	6.94E-06	0.032	19.95573763	2.763671052	2.158362492	-1.494850022	0.4223923	2.718285431	0.961985624	1.276284035	0.192089427	0.696759041	0.175939533	-0.019897499	0.208923723	1.573011309	0.149003679	4302.096476	826.3872465
2080	239.5375072	500	358	411.2668528	53	2.125202866	57.03245098	KRMEPIPIIITDTEIS	Kd	19955.73763	2763.671052	7.220735485	0.000357659	PIPIIITDTEIS	56	full	9799.832804	full_calibration2.csv	5.01E-05	6.94E-06	0.5	19.95573763	2.763671052	2.553883027	-0.301029996	0.4223923	2.718285431	0.961985624	1.276284035	0.192089427	0.696759041	0.175939533	-0.019897499	0.208923723	1.573011309	0.149003679	4302.096476	826.3872465
2081	30.84057936	63	162	55.85848313	49	-26.70307974	8.062477568	KRMEPIPIIITDTEIS	Kd	19955.73763	2763.671052	7.220735485	0.000357659	PIPIIITDTEIS	56	full	9799.832804	full_calibration2.csv	5.01E-05	6.94E-06	0.063	19.95573763	2.763671052	2.209515015	-1.200659451	0.4223923	2.718285431	0.961985624	1.276284035	0.192089427	0.696759041	0.175939533	-0.019897499	0.208923723	1.573011309	0.149003679	4302.096476	826.3872465
2082	5675.46713	1000	5694.5	1823.470721	82	0.327579398	202.6078579	KRMEPPAIIITDTEIS	Kd	726.7006537	116.2414095	6.251650393	0.000776652	PPAIIITDTEIS	57	full	9799.832804	full_calibration2.csv	0.001376082	0.000220115	1	0.726700654	0.11624141	3.755455597	0	0.583427548	3.733398165	0.90631202	-0.632517723	0.216360509	-1.212042716	0.20215895	-1.928699257	0.231436047	-0.335790449	0.17920831	172.0814233	37.23162429
2083	1438.274228	125	1856	1132.772379	74	0.697154467	132.5809787	KRMEPPAIIITDTEIS	Kd	726.7006537	116.2414095	6.251650393	0.000776652	PPAIIITDTEIS	57	full	9799.832804	full_calibration2.csv	0.001376082	0.000220115	0.125	0.726700654	0.11624141	3.268577972	-0.903089987	0.583427548	3.733398165	0.90631202	-0.632517723	0.216360509	-1.212042716	0.20215895	-1.928699257	0.231436047	-0.335790449	0.17920831	172.0814233	37.23162429
2084	7188.051824	2000	5685	2013.832594	64	0.363555368	253.7190584	KRMEPPAIIITDTEIS	Kd	726.7006537	116.2414095	6.251650393	0.000776652	PPAIIITDTEIS	57	full	9799.832804	full_calibration2.csv	0.001376082	0.000220115	2	0.726700654	0.11624141	3.754730469	0.301029996	0.583427548	3.733398165	0.90631202	-0.632517723	0.216360509	-1.212042716	0.20215895	-1.928699257	0.231436047	-0.335790449	0.17920831	172.0814233	37.23162429
2085	2508.402336	250	3231	1074.94183	73	0.345750111	126.6831096	KRMEPPAIIITDTEIS	Kd	726.7006537	116.2414095	6.251650393	0.000776652	PPAIIITDTEIS	57	full	9799.832804	full_calibration2.csv	0.001376082	0.000220115	0.25	0.726700654	0.11624141	3.509336958	-0.602059991	0.583427548	3.733398165	0.90631202	-0.632517723	0.216360509	-1.212042716	0.20215895	-1.928699257	0.231436047	-0.335790449	0.17920831	172.0814233	37.23162429
2086	413.3311975	32	515	220.9109266	86	0.570298073	23.96115423	KRMEPPAIIITDTEIS	Kd	726.7006537	116.2414095	6.251650393	0.000776652	PPAIIITDTEIS	57	full	9799.832804	full_calibration2.csv	0.001376082	0.000220115	0.032	0.726700654	0.11624141	2.711807229	-1.494850022	0.583427548	3.733398165	0.90631202	-0.632517723	0.216360509	-1.212042716	0.20215895	-1.928699257	0.231436047	-0.335790449	0.17920831	172.0814233	37.23162429
2087	3994.386395	500	4284	2007.93405	71	0.45113689	239.9940222	KRMEPPAIIITDTEIS	Kd	726.7006537	116.2414095	6.251650393	0.000776652	PPAIIITDTEIS	57	full	9799.832804	full_calibration2.csv	0.001376082	0.000220115	0.5	0.726700654	0.11624141	3.631849462	-0.301029996	0.583427548	3.733398165	0.90631202	-0.632517723	0.216360509	-1.212042716	0.20215895	-1.928699257	0.231436047	-0.335790449	0.17920831	172.0814233	37.23162429
2088	781.8018939	63	1125.25	532.8913544	72	0.548058101	63.24256852	KRMEPPAIIITDTEIS	Kd	726.7006537	116.2414095	6.251650393	0.000776652	PPAIIITDTEIS	57	full	9799.832804	full_calibration2.csv	0.001376082	0.000220115	0.063	0.726700654	0.11624141	3.051249022	-1.200659451	0.583427548	3.733398165	0.90631202	-0.632517723	0.216360509	-1.212042716	0.20215895	-1.928699257	0.231436047	-0.335790449	0.17920831	172.0814233	37.23162429
2089	5610.884023	1000	5673.25	1535.497652	122	0.28821573	139.5906956	KRMEPPAIIITDTEIS	Kd	746.575542	115.8973508	6.441696351	0.000662337	PPAIIITDTEIS	58	full	9799.832804	full_calibration2.csv	0.001339449	0.000207934	1	0.746575542	0.115897351	3.753831922	0	0.58623924	3.732539699	0.898939237	-0.632517723	0.216360509	-1.212042716	0.20215895	-1.928699257	0.231436047	-0.335790449	0.17920831	172.0814233	37.23162429
2090	1405.476682	125	2045	793.552195	85	0.434256243	86.58364289	KRMEPPAIIITDTEIS	Kd	746.575542	115.8973508	6.441696351	0.000662337	PPAIIITDTEIS	58	full	9799.832804	full_calibration2.csv	0.001339449	0.000207934	0.125	0.746575542	0.115897351	3.310693312	-0.903089987	0.58623924	3.732539699	0.898939237	-0.632517723	0.216360509	-1.212042716	0.20215895	-1.928699257	0.231436047	-0.335790449	0.17920831	172.0814233	37.23162429
2091	7136.037334	2000	5890.5	2156.427875	132	0.378666684	188.4079782	KRMEPPAIIITDTEIS	Kd	746.575542	115.8973508	6.441696351	0.000662337	PPAIIITDTEIS	58	full	9799.832804	full_calibration2.csv	0.001339449	0.000207934	2	0.746575542	0.115897351	3.77015216	0.301029996	0.58623924	3.732539699	0.898939237	-0.632517723	0.216360509	-1.212042716	0.20215895	-1.928699257	0.231436047	-0.335790449	0.17920831	172.0814233	37.23162429
2092	2458.376809	250	3385	1045.177759	95	0.318958328	107.8018547	KRMEPPAIIITDTEIS	Kd	746.575542	115.8973508	6.441696351	0.000662337	PPAIIITDTEIS	58	full	9799.832804	full_calibration2.csv	0.001339449	0.000207934	0.25	0.746575542	0.115897351	3.529558673	-0.602059991	0.58623924	3.732539699	0.898939237	-0.632517723	0.216360509	-1.212042716	0.20215895	-1.928699257	0.231436047	-0.335790449	0.17920831	172.0814233	37.23162429
2093	402.7799909	32	497.5	285.659076	65	0.721361303	35.7073845	KRMEPPAIIITDTEIS	Kd	746.575542	115.8973508	6.441696351	0.000662337	PPAIIITDTEIS	58	full	9799.832804	full_calibration2.csv	0.001339449	0.000207934	0.032	0.746575542	0.115897351	2.696793085	-1.494850022	0.58623924	3.732539699	0.898939237	-0.632517723	0.216360509	-1.212042716	0.20215895	-1.928699257	0.231436047	-0.335790449	0.17920831	172.0814233	37.23162429
2094	3930.701539	500	3732	1322.51506	65	0.345975437	165.3143825	KRMEPPAIIITDTEIS	Kd	746.575542	115.8973508	6.441696351	0.000662337	PPAIIITDTEIS	58	full	9799.832804	full_calibration2.csv	0.001339449	0.000207934	0.5	0.746575542	0.115897351	3.571941635	-0.301029996	0.58623924	3.732539699	0.898939237	-0.632517723	0.216360509	-1.212042716	0.20215895	-1.928699257	0.231436047	-0.335790449	0.17920831	172.0814233	37.23162429
2095	762.6088421	63	1077	469.2325179	97	0.497388828	47.89084331	KRMEPPAIIITDTEIS	Kd	746.575542	115.8973508	6.441696351	0.000662337	PPAIIITDTEIS	58	full	9799.832804	full_calibration2.csv	0.001339449	0.000207934	0.063	0.746575542	0.115897351	3.032215703	-1.200659451	0.58623924	3.732539699	0.898939237	-0.632517723	0.216360509	-1.212042716	0.20215895	-1.928699257	0.231436047	-0.335790449	0.17920831	172.0814233	37.23162429
2096	455.8271673	1000	647.5	261.9104063	95	0.479065966	27.01399577	KRMEPIAIYITDTEIS	Kd	20499.00995	3683.735875	5.564733912	0.001426519	PIAIYITDTEIS	59	full	9799.832804	full_calibration2.csv	4.88E-05	8.77E-06	1	20.49900995	3.683735875	2.811239773	0	0.42666824	2.729922553	0.963504969	1.347875296	0.231340858	0.768350302	0.218116858	0.051693762	0.245498201	1.64460257	0.197033858	4854.129126	1122.958399
2097	59.39577723	125	203	710.2019297	73	-5.999854284	83.69810009	KRMEPIAIYITDTEIS	Kd	20499.00995	3683.735875	5.564733912	0.001426519	PIAIYITDTEIS	59	full	9799.832804	full_calibration2.csv	4.88E-05	8.77E-06	0.125	20.49900995	3.683735875	2.307496038	-0.903089987	0.42666824	2.729922553	0.963504969	1.347875296	0.231340858	0.768350302	0.218116858	0.051693762	0.245498201	1.64460257	0.197033858	4854.129126	1122.958399
2098	871.1345812	2000	683	466.9309524	66	0.789310458	57.91565675	KRMEPIAIYITDTEIS	Kd	20499.00995	3683.735875	5.564733912	0.001426519	PIAIYITDTEIS	59	full	9799.832804	full_calibration2.csv	4.88E-05	8.77E-06	2	20.49900995	3.683735875	2.834420704	0.301029996	0.42666824	2.729922553	0.963504969	1.347875296	0.231340858	0.768350302	0.218116858	0.051693762	0.245498201	1.64460257	0.197033858	4854.129126	1122.958399
2099	118.0759085	250	288	189.1308379	87	1.651549021	20.39450275	KRMEPIAIYITDTEIS	Kd	20499.00995	3683.735875	5.564733912	0.001426519	PIAIYITDTEIS	59	full	9799.832804	full_calibration2.csv	4.88E-05	8.77E-06	0.25	20.49900995	3.683735875	2.459392488	-0.602059991	0.42666824	2.729922553	0.963504969	1.347875296	0.231340858	0.768350302	0.218116858	0.051693762	0.245498201	1.64460257	0.197033858	4854.129126	1122.958399
2100	15.27419501	32	141.5	29.48484184	80	-1.0988993	3.317303882	KRMEPIAIYITDTEIS	Kd	20499.00995	3683.735875	5.564733912	0.001426519	PIAIYITDTEIS	59	full	9799.832804	full_calibration2.csv	4.88E-05	8.77E-06	0.032	20.49900995	3.683735875	2.15075644	-1.494850022	0.42666824	2.729922553	0.963504969	1.347875296	0.231340858	0.768350302	0.218116858	0.051693762	0.245498201	1.64460257	0.197033858	4854.129126	1122.958399
2101	233.3403534	500	374.5	440.4033529	84	2.384471407	48.34054812	KRMEPIAIYITDTEIS	Kd	20499.00995	3683.735875	5.564733912	0.001426519	PIAIYITDTEIS	59	full	9799.832804	full_calibration2.csv	4.88E-05	8.77E-06	0.5	20.49900995	3.683735875	2.573451822	-0.301029996	0.42666824	2.729922553	0.963504969	1.347875296	0.231340858	0.768350302	0.218116858	0.051693762	0.245498201	1.64460257	0.197033858	4854.129126	1122.958399
2102	30.02573524	63	151.5	112.8363826	124	-4.712600687	10.17411399	KRMEPIAIYITDTEIS	Kd	20499.00995	3683.735875	5.564733912	0.001426519	PIAIYITDTEIS	59	full	9799.832804	full_calibration2.csv	4.88E-05	8.77E-06	0.063	20.49900995	3.683735875	2.180412633	-1.200659451	0.42666824	2.729922553	0.963504969	1.347875296	0.231340858	0.768350302	0.218116858	0.051693762	0.245498201	1.64460257	0.197033858	4854.129126	1122.958399
2103	614.8065768	1000	709.25	338.1022636	108	0.542720428	32.68557953	KRMEPIAIYITDTEIS	Kd	14939.70067	1629.581535	9.167814156	9.48E-05	PIAIYITDTEIS	60	full	9799.832804	full_calibration2.csv	6.69E-05	7.30E-06	1	14.93970067	1.629581535	2.850799344	0	0.5095748	2.826207668	0.977300628	1.347875296	0.231340858	0.768350302	0.218116858	0.051693762	0.245498201	1.64460257	0.197033858	4854.129126	1122.958399
2104	81.31453305	125	199	496.1467046	60	-8.836094472	64.59279916	KRMEPIAIYITDTEIS	Kd	14939.70067	1629.581535	9.167814156	9.48E-05	PIAIYITDTEIS	60	full	9799.832804	full_calibration2.csv	6.69E-05	7.30E-06	0.125	14.93970067	1.629581535	2.298853076	-0.903089987	0.5095748	2.826207668	0.977300628	1.347875296	0.231340858	0.768350302	0.218116858	0.051693762	0.245498201	1.64460257	0.197033858	4854.129126	1122.958399
2105	1157.025498	2000	1025	518.590877	70	0.558662974	62.43100514	KRMEPIAIYITDTEIS	Kd	14939.70067	1629.581535	9.167814156	9.48E-05	PIAIYITDTEIS	60	full	9799.832804	full_calibration2.csv	6.69E-05	7.30E-06	2	14.93970067	1.629581535	3.010723865	0.301029996	0.5095748	2.826207668	0.977300628	1.347875296	0.231340858	0.768350302	0.218116858	0.051693762	0.245498201	1.64460257	0.197033858	4854.129126	1122.958399
2106	161.2907492	250	314	398.4181183	79	3.10542463	45.11196853	KRMEPIAIYITDTEIS	Kd	14939.70067	1629.581535	9.167814156	9.48E-05	PIAIYITDTEIS	60	full	9799.832804	full_calibration2.csv	6.69E-05	7.30E-06	0.25	14.93970067	1.629581535	2.496929648	-0.602059991	0.5095748	2.826207668	0.977300628	1.347875296	0.231340858	0.768350302	0.218116858	0.051693762	0.245498201	1.64460257	0.197033858	4854.129126	1122.958399
2107	20.94582684	32	137	108.9923444	67	-2.106284129	13.41603018	KRMEPIAIYITDTEIS	Kd	14939.70067	1629.581535	9.167814156	9.48E-05	PIAIYITDTEIS	60	full	9799.832804	full_calibration2.csv	6.69E-05	7.30E-06	0.032	14.93970067	1.629581535	2.136720567	-1.494850022	0.5095748	2.826207668	0.977300628	1.347875296	0.231340858	0.768350302	0.218116858	0.051693762	0.245498201	1.64460257	0.197033858	4854.129126	1122.958399
2108	317.3582511	500	445.5	199.655038	64	0.658062183	25.15417041	KRMEPIAIYITDTEIS	Kd	14939.70067	1629.581535	9.167814156	9.48E-05	PIAIYITDTEIS	60	full	9799.832804	full_calibration2.csv	6.69E-05	7.30E-06	0.5	14.93970067	1.629581535	2.648847708	-0.301029996	0.5095748	2.826207668	0.977300628	1.347875296	0.231340858	0.768350302	0.218116858	0.051693762	0.245498201	1.64460257	0.197033858	4854.129126	1122.958399
2109	41.1518886	63	158.5	292.1707472	69	-7.045179647	35.4309074	KRMEPIAIYITDTEIS	Kd	14939.70067	1629.581535	9.167814156	9.48E-05	PIAIYITDTEIS	60	full	9799.832804	full_calibration2.csv	6.69E-05	7.30E-06	0.063	14.93970067	1.629581535	2.200029267	-1.200659451	0.5095748	2.826207668	0.977300628	1.347875296	0.231340858	0.768350302	0.218116858	0.051693762	0.245498201	1.64460257	0.197033858	4854.129126	1122.958399
2110	1510.359362	1000	1576.5	189.2502792	70	0.136587856	22.7830563	KRMEPIAIIITRTEIS	Kd	5488.411337	333.996379	16.43254742	3.24E-06	PIAIIITRTEIS	61	full	9799.832804	full_calibration2.csv	0.000182202	1.11E-05	1	5.488411337	0.333996379	3.197693975	0	0.61366598	3.17509267	0.989076219	0.56645681	0.157888238	-0.013068184	0.137786309	-0.729724724	0.177987274	0.863184084	0.101155544	1299.646051	205.1988247
2111	218.2236482	125	381.75	87.91333699	66	0.418272797	10.90430742	KRMEPIAIIITRTEIS	Kd	5488.411337	333.996379	16.43254742	3.24E-06	PIAIIITRTEIS	61	full	9799.832804	full_calibration2.csv	0.000182202	1.11E-05	0.125	5.488411337	0.333996379	2.581779046	-0.903089987	0.61366598	3.17509267	0.989076219	0.56645681	0.157888238	-0.013068184	0.137786309	-0.729724724	0.177987274	0.863184084	0.101155544	1299.646051	205.1988247
2112	2617.332933	2000	2470.25	573.3446473	96	0.246566708	58.82391965	KRMEPIAIIITRTEIS	Kd	5488.411337	333.996379	16.43254742	3.24E-06	PIAIIITRTEIS	61	full	9799.832804	full_calibration2.csv	0.000182202	1.11E-05	2	5.488411337	0.333996379	3.392740908	0.301029996	0.61366598	3.17509267	0.989076219	0.56645681	0.157888238	-0.013068184	0.137786309	-0.729724724	0.177987274	0.863184084	0.101155544	1299.646051	205.1988247
2113	426.9401507	250	591.25	146.6783079	66	0.348385724	18.19320499	KRMEPIAIIITRTEIS	Kd	5488.411337	333.996379	16.43254742	3.24E-06	PIAIIITRTEIS	61	full	9799.832804	full_calibration2.csv	0.000182202	1.11E-05	0.25	5.488411337	0.333996379	2.771771154	-0.602059991	0.61366598	3.17509267	0.989076219	0.56645681	0.157888238	-0.013068184	0.137786309	-0.729724724	0.177987274	0.863184084	0.101155544	1299.646051	205.1988247
2114	56.80639188	32	207	30.4251003	72	0.822917814	3.610795099	KRMEPIAIIITRTEIS	Kd	5488.411337	333.996379	16.43254742	3.24E-06	PIAIIITRTEIS	61	full	9799.832804	full_calibration2.csv	0.000182202	1.11E-05	0.032	5.488411337	0.333996379	2.315970345	-1.494850022	0.61366598	3.17509267	0.989076219	0.56645681	0.157888238	-0.013068184	0.137786309	-0.729724724	0.177987274	0.863184084	0.101155544	1299.646051	205.1988247
2115	818.233105	500	911.5	251.4628073	62	0.347874558	32.19651326	KRMEPIAIIITRTEIS	Kd	5488.411337	333.996379	16.43254742	3.24E-06	PIAIIITRTEIS	61	full	9799.832804	full_calibration2.csv	0.000182202	1.11E-05	0.5	5.488411337	0.333996379	2.959756673	-0.301029996	0.61366598	3.17509267	0.989076219	0.56645681	0.157888238	-0.013068184	0.137786309	-0.729724724	0.177987274	0.863184084	0.101155544	1299.646051	205.1988247
2116	111.2130644	63	268	33.08566342	63	0.306236215	4.201883456	KRMEPIAIIITRTEIS	Kd	5488.411337	333.996379	16.43254742	3.24E-06	PIAIIITRTEIS	61	full	9799.832804	full_calibration2.csv	0.000182202	1.11E-05	0.063	5.488411337	0.333996379	2.428134794	-1.200659451	0.61366598	3.17509267	0.989076219	0.56645681	0.157888238	-0.013068184	0.137786309	-0.729724724	0.177987274	0.863184084	0.101155544	1299.646051	205.1988247
2117	1503.208391	1000	1540.5	450.8257906	69	0.334031093	54.67065746	KRMEPIAIIITRTEIS	Kd	5519.277607	323.5481982	17.05859479	2.60E-06	PIAIIITRTEIS	62	full	9799.832804	full_calibration2.csv	0.000181183	1.06E-05	1	5.519277607	0.323548198	3.187661703	0	0.614363719	3.172208276	0.989787179	0.56645681	0.157888238	-0.013068184	0.137786309	-0.729724724	0.177987274	0.863184084	0.101155544	1299.646051	205.1988247
2118	217.0302713	125	391.5	173.3735133	66	0.866604959	21.50433771	KRMEPIAIIITRTEIS	Kd	5519.277607	323.5481982	17.05859479	2.60E-06	PIAIIITRTEIS	62	full	9799.832804	full_calibration2.csv	0.000181183	1.06E-05	0.125	5.519277607	0.323548198	2.592731766	-0.903089987	0.614363719	3.172208276	0.989787179	0.56645681	0.157888238	-0.013068184	0.137786309	-0.729724724	0.177987274	0.863184084	0.101155544	1299.646051	205.1988247
2119	2606.588908	2000	2481.5	368.3381804	78	0.157133986	41.97603137	KRMEPIAIIITRTEIS	Kd	5519.277607	323.5481982	17.05859479	2.60E-06	PIAIIITRTEIS	62	full	9799.832804	full_calibration2.csv	0.000181183	1.06E-05	2	5.519277607	0.323548198	3.39471428	0.301029996	0.614363719	3.172208276	0.989787179	0.56645681	0.157888238	-0.013068184	0.137786309	-0.729724724	0.177987274	0.863184084	0.101155544	1299.646051	205.1988247
2120	424.6559739	250	582.5	246.9319767	79	0.637410386	27.95954063	KRMEPIAIIITRTEIS	Kd	5519.277607	323.5481982	17.05859479	2.60E-06	PIAIIITRTEIS	62	full	9799.832804	full_calibration2.csv	0.000181183	1.06E-05	0.25	5.519277607	0.323548198	2.76529593	-0.602059991	0.614363719	3.172208276	0.989787179	0.56645681	0.157888238	-0.013068184	0.137786309	-0.729724724	0.177987274	0.863184084	0.101155544	1299.646051	205.1988247
2121	56.4905364	32	204.5	106.6430302	56	4.270296526	14.37974326	KRMEPIAIIITRTEIS	Kd	5519.277607	323.5481982	17.05859479	2.60E-06	PIAIIITRTEIS	62	full	9799.832804	full_calibration2.csv	0.000181183	1.06E-05	0.032	5.519277607	0.323548198	2.310693312	-1.494850022	0.614363719	3.172208276	0.989787179	0.56645681	0.157888238	-0.013068184	0.137786309	-0.729724724	0.177987274	0.863184084	0.101155544	1299.646051	205.1988247
2122	814.0372852	500	902.25	541.0091251	70	0.830314378	65.12984506	KRMEPIAIIITRTEIS	Kd	5519.277607	323.5481982	17.05859479	2.60E-06	PIAIIITRTEIS	62	full	9799.832804	full_calibration2.csv	0.000181183	1.06E-05	0.5	5.519277607	0.323548198	2.955326891	-0.301029996	0.614363719	3.172208276	0.989787179	0.56645681	0.157888238	-0.013068184	0.137786309	-0.729724724	0.177987274	0.863184084	0.101155544	1299.646051	205.1988247
2123	110.5981304	63	262	77.07129017	59	0.842855629	10.11995619	KRMEPIAIIITRTEIS	Kd	5519.277607	323.5481982	17.05859479	2.60E-06	PIAIIITRTEIS	62	full	9799.832804	full_calibration2.csv	0.000181183	1.06E-05	0.063	5.519277607	0.323548198	2.418301291	-1.200659451	0.614363719	3.172208276	0.989787179	0.56645681	0.157888238	-0.013068184	0.137786309	-0.729724724	0.177987274	0.863184084	0.101155544	1299.646051	205.1988247
2124	990.4995742	1000	996.5	1191.949321	89	1.966621362	127.0622245	KRMEPIAIIITKTEIS	Kd	8893.828387	729.4770396	12.19206076	1.85E-05	PIAIIITKTEIS	63	full	9799.832804	full_calibration2.csv	0.000112438	9.22E-06	1	8.893828387	0.72947704	2.998477303	0	0.542144365	3.007445097	0.97990163	0.852709032	0.167190793	0.273184039	0.148354752	-0.443472501	0.186288849	1.149436307	0.115136918	2106.042756	352.1109591
2125	135.824638	125	313.25	130.9009742	68	1.06761814	15.99209928	KRMEPIAIIITKTEIS	Kd	8893.828387	729.4770396	12.19206076	1.85E-05	PIAIIITKTEIS	63	full	9799.832804	full_calibration2.csv	0.000112438	9.22E-06	0.125	8.893828387	0.72947704	2.49589108	-0.903089987	0.542144365	3.007445097	0.97990163	0.852709032	0.167190793	0.273184039	0.148354752	-0.443472501	0.186288849	1.149436307	0.115136918	2106.042756	352.1109591
2126	1799.153145	2000	1692.5	295.2128857	69	0.197230683	35.79982087	KRMEPIAIIITKTEIS	Kd	8893.828387	729.4770396	12.19206076	1.85E-05	PIAIIITKTEIS	63	full	9799.832804	full_calibration2.csv	0.000112438	9.22E-06	2	8.893828387	0.72947704	3.228528677	0.301029996	0.542144365	3.007445097	0.97990163	0.852709032	0.167190793	0.273184039	0.148354752	-0.443472501	0.186288849	1.149436307	0.115136918	2106.042756	352.1109591
2127	267.9357155	250	429.5	162.2638504	69	0.638487963	19.67738218	KRMEPIAIIITKTEIS	Kd	8893.828387	729.4770396	12.19206076	1.85E-05	PIAIIITKTEIS	63	full	9799.832804	full_calibration2.csv	0.000112438	9.22E-06	0.25	8.893828387	0.72947704	2.632963168	-0.602059991	0.542144365	3.007445097	0.97990163	0.852709032	0.167190793	0.273184039	0.148354752	-0.443472501	0.186288849	1.149436307	0.115136918	2106.042756	352.1109591
2128	35.13339448	32	185.5	33.72877616	61	1.490369682	4.354366279	KRMEPIAIIITKTEIS	Kd	8893.828387	729.4770396	12.19206076	1.85E-05	PIAIIITKTEIS	63	full	9799.832804	full_calibration2.csv	0.000112438	9.22E-06	0.032	8.893828387	0.72947704	2.268343914	-1.494850022	0.542144365	3.007445097	0.97990163	0.852709032	0.167190793	0.273184039	0.148354752	-0.443472501	0.186288849	1.149436307	0.115136918	2106.042756	352.1109591
2129	521.6101679	500	664	342.5519996	55	0.769575393	46.61542274	KRMEPIAIIITKTEIS	Kd	8893.828387	729.4770396	12.19206076	1.85E-05	PIAIIITKTEIS	63	full	9799.832804	full_calibration2.csv	0.000112438	9.22E-06	0.5	8.893828387	0.72947704	2.822168079	-0.301029996	0.542144365	3.007445097	0.97990163	0.852709032	0.167190793	0.273184039	0.148354752	-0.443472501	0.186288849	1.149436307	0.115136918	2106.042756	352.1109591
2130	68.92947369	63	213	707.0311235	69	-6.268167483	85.74011773	KRMEPIAIIITKTEIS	Kd	8893.828387	729.4770396	12.19206076	1.85E-05	PIAIIITKTEIS	63	full	9799.832804	full_calibration2.csv	0.000112438	9.22E-06	0.063	8.893828387	0.72947704	2.328379603	-1.200659451	0.542144365	3.007445097	0.97990163	0.852709032	0.167190793	0.273184039	0.148354752	-0.443472501	0.186288849	1.149436307	0.115136918	2106.042756	352.1109591
2131	981.7789062	1000	1013	203.5454555	100	0.242386715	20.457088	KRMEPIAIIITKTEIS	Kd	8981.710487	737.0050135	12.18676986	1.86E-05	PIAIIITKTEIS	64	full	9799.832804	full_calibration2.csv	0.000111337	9.14E-06	1	8.981710487	0.737005014	3.005609445	0	0.54440479	3.004796403	0.981458857	0.852709032	0.167190793	0.273184039	0.148354752	-0.443472501	0.186288849	1.149436307	0.115136918	2106.042756	352.1109591
2132	134.5138953	125	312.75	357.5106439	66	4.648025706	44.34373783	KRMEPIAIIITKTEIS	Kd	8981.710487	737.0050135	12.18676986	1.86E-05	PIAIIITKTEIS	64	full	9799.832804	full_calibration2.csv	0.000111337	9.14E-06	0.125	8.981710487	0.737005014	2.495197318	-0.903089987	0.54440479	3.004796403	0.981458857	0.852709032	0.167190793	0.273184039	0.148354752	-0.443472501	0.186288849	1.149436307	0.115136918	2106.042756	352.1109591
2133	1784.755265	2000	1668.25	360.3977066	66	0.239322353	44.70183388	KRMEPIAIIITKTEIS	Kd	8981.710487	737.0050135	12.18676986	1.86E-05	PIAIIITKTEIS	64	full	9799.832804	full_calibration2.csv	0.000111337	9.14E-06	2	8.981710487	0.737005014	3.222261134	0.301029996	0.54440479	3.004796403	0.981458857	0.852709032	0.167190793	0.273184039	0.148354752	-0.443472501	0.186288849	1.149436307	0.115136918	2106.042756	352.1109591
2134	265.3850773	250	429.25	162.17827	68	0.660149194	19.81322913	KRMEPIAIIITKTEIS	Kd	8981.710487	737.0050135	12.18676986	1.86E-05	PIAIIITKTEIS	64	full	9799.832804	full_calibration2.csv	0.000111337	9.14E-06	0.25	8.981710487	0.737005014	2.632710304	-0.602059991	0.54440479	3.004796403	0.981458857	0.852709032	0.167190793	0.273184039	0.148354752	-0.443472501	0.186288849	1.149436307	0.115136918	2106.042756	352.1109591
2135	34.79085003	32	181.75	53.54605834	68	5.071214439	6.541692194	KRMEPIAIIITKTEIS	Kd	8981.710487	737.0050135	12.18676986	1.86E-05	PIAIIITKTEIS	64	full	9799.832804	full_calibration2.csv	0.000111337	9.14E-06	0.032	8.981710487	0.737005014	2.25947442	-1.494850022	0.54440479	3.004796403	0.981458857	0.852709032	0.167190793	0.273184039	0.148354752	-0.443472501	0.186288849	1.149436307	0.115136918	2106.042756	352.1109591
2136	516.7755764	500	643	108.043356	79	0.224103372	12.23350107	KRMEPIAIIITKTEIS	Kd	8981.710487	737.0050135	12.18676986	1.86E-05	PIAIIITKTEIS	64	full	9799.832804	full_calibration2.csv	0.000111337	9.14E-06	0.5	8.981710487	0.737005014	2.808210973	-0.301029996	0.54440479	3.004796403	0.981458857	0.852709032	0.167190793	0.273184039	0.148354752	-0.443472501	0.186288849	1.149436307	0.115136918	2106.042756	352.1109591
2137	68.25972678	63	210.5	665.457483	70	-9.613460698	80.11166678	KRMEPIAIIITKTEIS	Kd	8981.710487	737.0050135	12.18676986	1.86E-05	PIAIIITKTEIS	64	full	9799.832804	full_calibration2.csv	0.000111337	9.14E-06	0.063	8.981710487	0.737005014	2.3232521	-1.200659451	0.54440479	3.004796403	0.981458857	0.852709032	0.167190793	0.273184039	0.148354752	-0.443472501	0.186288849	1.149436307	0.115136918	2106.042756	352.1109591
2138	2371.848006	1000	2571	845.1861984	64	0.367643344	106.483452	KRMEPIAIIITDTTIS	Kd	3131.728837	286.9578814	10.91354878	3.51E-05	PIAIIITDTTIS	65	full	9799.832804	full_calibration2.csv	0.000319312	2.93E-05	1	3.131728837	0.286957881	3.410102077	0	0.696131319	3.391508878	0.984654709	0.233751999	0.172108393	-0.345772994	0.153875502	-1.062429535	0.190714638	0.530479273	0.122168112	741.5878231	127.6334886
2139	376.1378861	125	638.5	261.6681274	75	0.568884979	30.41830194	KRMEPIAIIITDTTIS	Kd	3131.728837	286.9578814	10.91354878	3.51E-05	PIAIIITDTTIS	65	full	9799.832804	full_calibration2.csv	0.000319312	2.93E-05	0.125	3.131728837	0.286957881	2.805160902	-0.903089987	0.696131319	3.391508878	0.984654709	0.233751999	0.172108393	-0.345772994	0.153875502	-1.062429535	0.190714638	0.530479273	0.122168112	741.5878231	127.6334886
2140	3819.310456	2000	3377.5	1174.666083	83	0.36210489	129.7201682	KRMEPIAIIITDTTIS	Kd	3131.728837	286.9578814	10.91354878	3.51E-05	PIAIIITDTTIS	65	full	9799.832804	full_calibration2.csv	0.000319312	2.93E-05	2	3.131728837	0.286957881	3.528595358	0.301029996	0.696131319	3.391508878	0.984654709	0.233751999	0.172108393	-0.345772994	0.153875502	-1.062429535	0.190714638	0.530479273	0.122168112	741.5878231	127.6334886
2141	724.4691455	250	1100	537.66363	66	0.628980105	66.68896565	KRMEPIAIIITDTTIS	Kd	3131.728837	286.9578814	10.91354878	3.51E-05	PIAIIITDTTIS	65	full	9799.832804	full_calibration2.csv	0.000319312	2.93E-05	0.25	3.131728837	0.286957881	3.041392685	-0.602059991	0.696131319	3.391508878	0.984654709	0.233751999	0.172108393	-0.345772994	0.153875502	-1.062429535	0.190714638	0.530479273	0.122168112	741.5878231	127.6334886
2142	99.12184825	32	202	181.4204617	73	13.27688592	21.38060646	KRMEPIAIIITDTTIS	Kd	3131.728837	286.9578814	10.91354878	3.51E-05	PIAIIITDTTIS	65	full	9799.832804	full_calibration2.csv	0.000319312	2.93E-05	0.032	3.131728837	0.286957881	2.305351369	-1.494850022	0.696131319	3.391508878	0.984654709	0.233751999	0.172108393	-0.345772994	0.153875502	-1.062429535	0.190714638	0.530479273	0.122168112	741.5878231	127.6334886
2143	1349.196656	500	1597	769.9883431	74	0.53790694	90.120319	KRMEPIAIIITDTTIS	Kd	3131.728837	286.9578814	10.91354878	3.51E-05	PIAIIITDTTIS	65	full	9799.832804	full_calibration2.csv	0.000319312	2.93E-05	0.5	3.131728837	0.286957881	3.203304916	-0.301029996	0.696131319	3.391508878	0.984654709	0.233751999	0.172108393	-0.345772994	0.153875502	-1.062429535	0.190714638	0.530479273	0.122168112	741.5878231	127.6334886
2144	193.2525413	63	333	334.5339364	100	2.676699763	33.62192566	KRMEPIAIIITDTTIS	Kd	3131.728837	286.9578814	10.91354878	3.51E-05	PIAIIITDTTIS	65	full	9799.832804	full_calibration2.csv	0.000319312	2.93E-05	0.063	3.131728837	0.286957881	2.522444234	-1.200659451	0.696131319	3.391508878	0.984654709	0.233751999	0.172108393	-0.345772994	0.153875502	-1.062429535	0.190714638	0.530479273	0.122168112	741.5878231	127.6334886
2145	2521.765847	1000	2678	1262.308043	79	0.536326131	142.9282407	KRMEPIAIIITDTTIS	Kd	2886.099424	222.79476	12.95407227	1.30E-05	PIAIIITDTTIS	66	full	9799.832804	full_calibration2.csv	0.000346488	2.67E-05	1	2.886099424	0.22279476	3.427810573	0	0.712789317	3.408235319	0.989822374	0.233751999	0.172108393	-0.345772994	0.153875502	-1.062429535	0.190714638	0.530479273	0.122168112	741.5878231	127.6334886
2146	406.8212065	125	585	244.5677899	83	0.588320795	27.00799426	KRMEPIAIIITDTTIS	Kd	2886.099424	222.79476	12.95407227	1.30E-05	PIAIIITDTTIS	66	full	9799.832804	full_calibration2.csv	0.000346488	2.67E-05	0.125	2.886099424	0.22279476	2.767155866	-0.903089987	0.712789317	3.408235319	0.989822374	0.233751999	0.172108393	-0.345772994	0.153875502	-1.062429535	0.190714638	0.530479273	0.122168112	741.5878231	127.6334886
2147	4011.311254	2000	3609.25	1206.919269	68	0.364795924	147.4486564	KRMEPIAIIITDTTIS	Kd	2886.099424	222.79476	12.95407227	1.30E-05	PIAIIITDTTIS	66	full	9799.832804	full_calibration2.csv	0.000346488	2.67E-05	2	2.886099424	0.22279476	3.557416965	0.301029996	0.712789317	3.408235319	0.989822374	0.233751999	0.172108393	-0.345772994	0.153875502	-1.062429535	0.190714638	0.530479273	0.122168112	741.5878231	127.6334886
2148	781.2119037	250	1073	518.9657759	70	0.562420819	62.47613766	KRMEPIAIIITDTTIS	Kd	2886.099424	222.79476	12.95407227	1.30E-05	PIAIIITDTTIS	66	full	9799.832804	full_calibration2.csv	0.000346488	2.67E-05	0.25	2.886099424	0.22279476	3.030599722	-0.602059991	0.712789317	3.408235319	0.989822374	0.233751999	0.172108393	-0.345772994	0.153875502	-1.062429535	0.190714638	0.530479273	0.122168112	741.5878231	127.6334886
2149	107.4653753	32	213.75	127.893205	88	3.399154949	13.71159082	KRMEPIAIIITDTTIS	Kd	2886.099424	222.79476	12.95407227	1.30E-05	PIAIIITDTTIS	66	full	9799.832804	full_calibration2.csv	0.000346488	2.67E-05	0.032	2.886099424	0.22279476	2.329906123	-1.494850022	0.712789317	3.408235319	0.989822374	0.233751999	0.172108393	-0.345772994	0.153875502	-1.062429535	0.190714638	0.530479273	0.122168112	741.5878231	127.6334886
2150	1447.068083	500	1727.25	816.8260943	84	0.554297121	89.65831178	KRMEPIAIIITDTTIS	Kd	2886.099424	222.79476	12.95407227	1.30E-05	PIAIIITDTTIS	66	full	9799.832804	full_calibration2.csv	0.000346488	2.67E-05	0.5	2.886099424	0.22279476	3.237355201	-0.301029996	0.712789317	3.408235319	0.989822374	0.233751999	0.172108393	-0.345772994	0.153875502	-1.062429535	0.190714638	0.530479273	0.122168112	741.5878231	127.6334886
2151	209.3484749	63	326	132.5523994	97	0.876842687	13.52857261	KRMEPIAIIITDTTIS	Kd	2886.099424	222.79476	12.95407227	1.30E-05	PIAIIITDTTIS	66	full	9799.832804	full_calibration2.csv	0.000346488	2.67E-05	0.063	2.886099424	0.22279476	2.5132176	-1.200659451	0.712789317	3.408235319	0.989822374	0.233751999	0.172108393	-0.345772994	0.153875502	-1.062429535	0.190714638	0.530479273	0.122168112	741.5878231	127.6334886
2152	941.4518813	1000	1139	598.5689117	35	0.725123718	102.6537215	KRMEPIAIIITDYEIS	Kd	9409.276351	989.0006168	9.513923642	7.69E-05	PIAIIITDYEIS	67	full	9799.832804	full_calibration2.csv	0.000106278	1.12E-05	1	9.409276351	0.989000617	3.056523724	0	0.612165416	3.007441803	0.974403995	0.886117734	0.179647734	0.306592741	0.162264228	-0.410063799	0.19754514	1.182845009	0.132578493	2228.099918	400.2731017
2153	128.4816021	125	237	246.4311494	27	5.171893535	48.32912459	KRMEPIAIIITDYEIS	Kd	9409.276351	989.0006168	9.513923642	7.69E-05	PIAIIITDYEIS	67	full	9799.832804	full_calibration2.csv	0.000106278	1.12E-05	0.125	9.409276351	0.989000617	2.374748346	-0.903089987	0.612165416	3.007441803	0.974403995	0.886117734	0.179647734	0.306592741	0.162264228	-0.410063799	0.19754514	1.182845009	0.132578493	2228.099918	400.2731017
2154	1717.871056	2000	1505	737.9600675	28	0.533703944	142.0204812	KRMEPIAIIITDYEIS	Kd	9409.276351	989.0006168	9.513923642	7.69E-05	PIAIIITDYEIS	67	full	9799.832804	full_calibration2.csv	0.000106278	1.12E-05	2	9.409276351	0.989000617	3.1775365	0.301029996	0.612165416	3.007441803	0.974403995	0.886117734	0.179647734	0.306592741	0.162264228	-0.410063799	0.19754514	1.182845009	0.132578493	2228.099918	400.2731017
2155	253.6378619	250	524.75	293.3244894	28	0.858435924	56.4503243	KRMEPIAIIITDYEIS	Kd	9409.276351	989.0006168	9.513923642	7.69E-05	PIAIIITDYEIS	67	full	9799.832804	full_calibration2.csv	0.000106278	1.12E-05	0.25	9.409276351	0.989000617	2.719952447	-0.602059991	0.612165416	3.007441803	0.974403995	0.886117734	0.179647734	0.306592741	0.162264228	-0.410063799	0.19754514	1.182845009	0.132578493	2228.099918	400.2731017
2156	33.21528129	32	135	65.08092919	16	-1.767903	16.80382366	KRMEPIAIIITDYEIS	Kd	9409.276351	989.0006168	9.513923642	7.69E-05	PIAIIITDYEIS	67	full	9799.832804	full_calibration2.csv	0.000106278	1.12E-05	0.032	9.409276351	0.989000617	2.130333768	-1.494850022	0.612165416	3.007441803	0.974403995	0.886117734	0.179647734	0.306592741	0.162264228	-0.410063799	0.19754514	1.182845009	0.132578493	2228.099918	400.2731017
2157	494.4777225	500	583.75	879.4296179	28	2.79977593	169.2463089	KRMEPIAIIITDYEIS	Kd	9409.276351	989.0006168	9.513923642	7.69E-05	PIAIIITDYEIS	67	full	9799.832804	full_calibration2.csv	0.000106278	1.12E-05	0.5	9.409276351	0.989000617	2.766226894	-0.301029996	0.612165416	3.007441803	0.974403995	0.886117734	0.179647734	0.306592741	0.162264228	-0.410063799	0.19754514	1.182845009	0.132578493	2228.099918	400.2731017
2158	65.17857416	63	180	411.0906884	31	-9.145182161	75.05454774	KRMEPIAIIITDYEIS	Kd	9409.276351	989.0006168	9.513923642	7.69E-05	PIAIIITDYEIS	67	full	9799.832804	full_calibration2.csv	0.000106278	1.12E-05	0.063	9.409276351	0.989000617	2.255272505	-1.200659451	0.612165416	3.007441803	0.974403995	0.886117734	0.179647734	0.306592741	0.162264228	-0.410063799	0.19754514	1.182845009	0.132578493	2228.099918	400.2731017
2159	1205.046346	1000	1368.75	1117.292584	86	1.024143189	121.1873959	KRMEPIAIIITDYEIS	Kd	7132.328547	611.585568	11.66202887	2.40E-05	PIAIIITDYEIS	68	full	9799.832804	full_calibration2.csv	0.000140207	1.20E-05	1	7.132328547	0.611585568	3.136324132	0	0.640497022	3.101292464	0.989149409	0.886117734	0.179647734	0.306592741	0.162264228	-0.410063799	0.19754514	1.182845009	0.132578493	2228.099918	400.2731017
2160	168.7920138	125	286.5	257.9548937	90	2.419965647	27.34316405	KRMEPIAIIITDYEIS	Kd	7132.328547	611.585568	11.66202887	2.40E-05	PIAIIITDYEIS	68	full	9799.832804	full_calibration2.csv	0.000140207	1.20E-05	0.125	7.132328547	0.611585568	2.457124626	-0.903089987	0.640497022	3.101292464	0.989149409	0.886117734	0.179647734	0.306592741	0.162264228	-0.410063799	0.19754514	1.182845009	0.132578493	2228.099918	400.2731017
2161	2146.184898	2000	1914.25	676.8411481	72	0.389668784	80.32626601	KRMEPIAIIITDYEIS	Kd	7132.328547	611.585568	11.66202887	2.40E-05	PIAIIITDYEIS	68	full	9799.832804	full_calibration2.csv	0.000140207	1.20E-05	2	7.132328547	0.611585568	3.281998656	0.301029996	0.640497022	3.101292464	0.989149409	0.886117734	0.179647734	0.306592741	0.162264228	-0.410063799	0.19754514	1.182845009	0.132578493	2228.099918	400.2731017
2162	331.8679446	250	501.5	348.0960248	99	1.02472514	35.16300853	KRMEPIAIIITDYEIS	Kd	7132.328547	611.585568	11.66202887	2.40E-05	PIAIIITDYEIS	68	full	9799.832804	full_calibration2.csv	0.000140207	1.20E-05	0.25	7.132328547	0.611585568	2.700270937	-0.602059991	0.640497022	3.101292464	0.989149409	0.886117734	0.179647734	0.306592741	0.162264228	-0.410063799	0.19754514	1.182845009	0.132578493	2228.099918	400.2731017
2163	43.77167346	32	157	133.7364447	99	-6.03734976	13.50942099	KRMEPIAIIITDYEIS	Kd	7132.328547	611.585568	11.66202887	2.40E-05	PIAIIITDYEIS	68	full	9799.832804	full_calibration2.csv	0.000140207	1.20E-05	0.032	7.132328547	0.611585568	2.195899652	-1.494850022	0.640497022	3.101292464	0.989149409	0.886117734	0.179647734	0.306592741	0.162264228	-0.410063799	0.19754514	1.182845009	0.132578493	2228.099918	400.2731017
2164	641.9949523	500	853	372.5999854	85	0.529615364	40.65399136	KRMEPIAIIITDYEIS	Kd	7132.328547	611.585568	11.66202887	2.40E-05	PIAIIITDYEIS	68	full	9799.832804	full_calibration2.csv	0.000140207	1.20E-05	0.5	7.132328547	0.611585568	2.930949031	-0.301029996	0.640497022	3.101292464	0.989149409	0.886117734	0.179647734	0.306592741	0.162264228	-0.410063799	0.19754514	1.182845009	0.132578493	2228.099918	400.2731017
2165	85.80420791	63	207	70.33259079	84	1.311417897	7.720004782	KRMEPIAIIITDYEIS	Kd	7132.328547	611.585568	11.66202887	2.40E-05	PIAIIITDYEIS	68	full	9799.832804	full_calibration2.csv	0.000140207	1.20E-05	0.063	7.132328547	0.611585568	2.315970345	-1.200659451	0.640497022	3.101292464	0.989149409	0.886117734	0.179647734	0.306592741	0.162264228	-0.410063799	0.19754514	1.182845009	0.132578493	2228.099918	400.2731017
2166	8492.393109	1000	8894.5	2359.870949	107	0.269138694	229.2109289	KRMEPPKIIITDTEIS	Kd	153.9542127	12.39934699	12.41631619	1.67E-05	PPKIIITDTEIS	69	full	9799.832804	full_calibration2.csv	0.006495438	0.000523137	1	0.153954213	0.012399347	3.949121539	0	0.433362953	3.953165484	0.900265823	-1.552770347	0.166469051	-2.13229534	0.147540896	-2.84895188	0.185641372	-1.256043072	0.114086342	36.45608397	6.068809696
2167	4391.326765	125	4579	1434.008245	107	0.319678657	139.2831935	KRMEPPKIIITDTEIS	Kd	153.9542127	12.39934699	12.41631619	1.67E-05	PPKIIITDTEIS	69	full	9799.832804	full_calibration2.csv	0.006495438	0.000523137	0.125	0.153954213	0.012399347	3.660770644	-0.903089987	0.433362953	3.953165484	0.900265823	-1.552770347	0.166469051	-2.13229534	0.147540896	-2.84895188	0.185641372	-1.256043072	0.114086342	36.45608397	6.068809696
2168	9099.388228	2000	9773.75	4416.255517	112	0.420738872	419.1724235	KRMEPPKIIITDTEIS	Kd	153.9542127	12.39934699	12.41631619	1.67E-05	PPKIIITDTEIS	69	full	9799.832804	full_calibration2.csv	0.006495438	0.000523137	2	0.153954213	0.012399347	3.990061226	0.301029996	0.433362953	3.953165484	0.900265823	-1.552770347	0.166469051	-2.13229534	0.147540896	-2.84895188	0.185641372	-1.256043072	0.114086342	36.45608397	6.068809696
2169	6064.940342	250	5682	1559.273372	131	0.277379947	136.7573215	KRMEPPKIIITDTEIS	Kd	153.9542127	12.39934699	12.41631619	1.67E-05	PPKIIITDTEIS	69	full	9799.832804	full_calibration2.csv	0.006495438	0.000523137	0.25	0.153954213	0.012399347	3.754501229	-0.602059991	0.433362953	3.953165484	0.900265823	-1.552770347	0.166469051	-2.13229534	0.147540896	-2.84895188	0.185641372	-1.256043072	0.114086342	36.45608397	6.068809696
2170	1686.40788	32	1486	1058.356863	111	0.729119842	100.9103675	KRMEPPKIIITDTEIS	Kd	153.9542127	12.39934699	12.41631619	1.67E-05	PPKIIITDTEIS	69	full	9799.832804	full_calibration2.csv	0.006495438	0.000523137	0.032	0.153954213	0.012399347	3.172018809	-1.494850022	0.433362953	3.953165484	0.900265823	-1.552770347	0.166469051	-2.13229534	0.147540896	-2.84895188	0.185641372	-1.256043072	0.114086342	36.45608397	6.068809696
2171	7492.75149	500	7354	3060.330369	144	0.416305202	255.9176819	KRMEPPKIIITDTEIS	Kd	153.9542127	12.39934699	12.41631619	1.67E-05	PPKIIITDTEIS	69	full	9799.832804	full_calibration2.csv	0.006495438	0.000523137	0.5	0.153954213	0.012399347	3.866523626	-0.301029996	0.433362953	3.953165484	0.900265823	-1.552770347	0.166469051	-2.13229534	0.147540896	-2.84895188	0.185641372	-1.256043072	0.114086342	36.45608397	6.068809696
2172	2845.713199	63	2875.75	1159.338609	120	0.403275681	106.276396	KRMEPPKIIITDTEIS	Kd	153.9542127	12.39934699	12.41631619	1.67E-05	PPKIIITDTEIS	69	full	9799.832804	full_calibration2.csv	0.006495438	0.000523137	0.063	0.153954213	0.012399347	3.458751128	-1.200659451	0.433362953	3.953165484	0.900265823	-1.552770347	0.166469051	-2.13229534	0.147540896	-2.84895188	0.185641372	-1.256043072	0.114086342	36.45608397	6.068809696
2173	563.1728631	1000	593	1244.644943	85	1.916451314	135.8018967	MAGPHPVIVITGLHEE	Kd	16401.10976	1517.595455	10.80730026	3.71E-05	HPVIVITGLH	70	full	9799.832804	full_calibration2.csv	6.10E-05	5.64E-06	1	16.40110976	1.517595455	2.773054693	0	0.470822111	2.763631949	0.930731346	1.24856283	0.185078622	0.669037837	0.168257147	-0.047618703	0.202496593	1.545290105	0.139849365	4105.613003	759.8611968
2174	74.12386329	125	185.5	673.6161389	87	-10.98698989	72.63789633	MAGPHPVIVITGLHEE	Kd	16401.10976	1517.595455	10.80730026	3.71E-05	HPVIVITGLH	70	full	9799.832804	full_calibration2.csv	6.10E-05	5.64E-06	0.125	16.40110976	1.517595455	2.268343914	-0.903089987	0.470822111	2.763631949	0.930731346	1.24856283	0.185078622	0.669037837	0.168257147	-0.047618703	0.202496593	1.545290105	0.139849365	4105.613003	759.8611968
2175	1065.134976	2000	992.5	876.2073008	105	1.071707087	85.9191947	MAGPHPVIVITGLHEE	Kd	16401.10976	1517.595455	10.80730026	3.71E-05	HPVIVITGLH	70	full	9799.832804	full_calibration2.csv	6.10E-05	5.64E-06	2	16.40110976	1.517595455	2.996730515	0.301029996	0.470822111	2.763631949	0.930731346	1.24856283	0.185078622	0.669037837	0.168257147	-0.047618703	0.202496593	1.545290105	0.139849365	4105.613003	759.8611968
2176	147.1348298	250	245.75	906.8746714	106	4.655707236	88.50190579	MAGPHPVIVITGLHEE	Kd	16401.10976	1517.595455	10.80730026	3.71E-05	HPVIVITGLH	70	full	9799.832804	full_calibration2.csv	6.10E-05	5.64E-06	0.25	16.40110976	1.517595455	2.390493527	-0.602059991	0.470822111	2.763631949	0.930731346	1.24856283	0.185078622	0.669037837	0.168257147	-0.047618703	0.202496593	1.545290105	0.139849365	4105.613003	759.8611968
2177	19.08309835	32	145	180.5624149	104	-41.96310871	17.79134339	MAGPHPVIVITGLHEE	Kd	16401.10976	1517.595455	10.80730026	3.71E-05	HPVIVITGLH	70	full	9799.832804	full_calibration2.csv	6.10E-05	5.64E-06	0.032	16.40110976	1.517595455	2.161368002	-1.494850022	0.470822111	2.763631949	0.930731346	1.24856283	0.185078622	0.669037837	0.168257147	-0.047618703	0.202496593	1.545290105	0.139849365	4105.613003	759.8611968
2178	289.916844	500	374	1906.912674	93	3.543208069	198.8093894	MAGPHPVIVITGLHEE	Kd	16401.10976	1517.595455	10.80730026	3.71E-05	HPVIVITGLH	70	full	9799.832804	full_calibration2.csv	6.10E-05	5.64E-06	0.5	16.40110976	1.517595455	2.572871602	-0.301029996	0.470822111	2.763631949	0.930731346	1.24856283	0.185078622	0.669037837	0.168257147	-0.047618703	0.202496593	1.545290105	0.139849365	4105.613003	759.8611968
2179	37.49911023	63	160.25	290.9403839	84	10.92001441	31.93485594	MAGPHPVIVITGLHEE	Kd	16401.10976	1517.595455	10.80730026	3.71E-05	HPVIVITGLH	70	full	9799.832804	full_calibration2.csv	6.10E-05	5.64E-06	0.063	16.40110976	1.517595455	2.204798038	-1.200659451	0.470822111	2.763631949	0.930731346	1.24856283	0.185078622	0.669037837	0.168257147	-0.047618703	0.202496593	1.545290105	0.139849365	4105.613003	759.8611968
2180	8436.671055	1000	8031	3136.565465	93	0.36178998	327.009555	KRMEPPKIIITDTEIS	Kd	161.575785	7.231515682	22.34328073	5.26E-07	PPKIIITDTEIS	71	full	9799.832804	full_calibration2.csv	0.006189046	0.000276998	1	0.161575785	0.007231516	3.904769626	0	0.42545397	3.935066673	0.867222632	-1.552770347	0.166469051	-2.13229534	0.147540896	-2.84895188	0.185641372	-1.256043072	0.114086342	36.45608397	6.068809696
2181	4274.538062	125	4482.5	1303.829616	70	0.290446206	156.9626406	KRMEPPKIIITDTEIS	Kd	161.575785	7.231515682	22.34328073	5.26E-07	PPKIIITDTEIS	71	full	9799.832804	full_calibration2.csv	0.006189046	0.000276998	0.125	0.161575785	0.007231516	3.651520298	-0.903089987	0.42545397	3.935066673	0.867222632	-1.552770347	0.166469051	-2.13229534	0.147540896	-2.84895188	0.185641372	-1.256043072	0.114086342	36.45608397	6.068809696
2182	9067.304391	2000	9088.5	3299.74788	79	0.350115986	373.6228744	KRMEPPKIIITDTEIS	Kd	161.575785	7.231515682	22.34328073	5.26E-07	PPKIIITDTEIS	71	full	9799.832804	full_calibration2.csv	0.006189046	0.000276998	2	0.161575785	0.007231516	3.958492212	0.301029996	0.42545397	3.935066673	0.867222632	-1.552770347	0.166469051	-2.13229534	0.147540896	-2.84895188	0.185641372	-1.256043072	0.114086342	36.45608397	6.068809696
2183	5952.629601	250	5961	1567.190584	92	0.269314204	164.2862125	KRMEPPKIIITDTEIS	Kd	161.575785	7.231515682	22.34328073	5.26E-07	PPKIIITDTEIS	71	full	9799.832804	full_calibration2.csv	0.006189046	0.000276998	0.25	0.161575785	0.007231516	3.775319122	-0.602059991	0.42545397	3.935066673	0.867222632	-1.552770347	0.166469051	-2.13229534	0.147540896	-2.84895188	0.185641372	-1.256043072	0.114086342	36.45608397	6.068809696
2184	1620.009702	32	1435.5	581.375882	71	0.413401112	69.4877087	KRMEPPKIIITDTEIS	Kd	161.575785	7.231515682	22.34328073	5.26E-07	PPKIIITDTEIS	71	full	9799.832804	full_calibration2.csv	0.006189046	0.000276998	0.032	0.161575785	0.007231516	3.157003197	-1.494850022	0.42545397	3.935066673	0.867222632	-1.552770347	0.166469051	-2.13229534	0.147540896	-2.84895188	0.185641372	-1.256043072	0.114086342	36.45608397	6.068809696
2185	7406.43251	500	7554.5	2001.558346	105	0.26822237	196.2689435	KRMEPPKIIITDTEIS	Kd	161.575785	7.231515682	22.34328073	5.26E-07	PPKIIITDTEIS	71	full	9799.832804	full_calibration2.csv	0.006189046	0.000276998	0.5	0.161575785	0.007231516	3.878205726	-0.301029996	0.42545397	3.935066673	0.867222632	-1.552770347	0.166469051	-2.13229534	0.147540896	-2.84895188	0.185641372	-1.256043072	0.114086342	36.45608397	6.068809696
2186	2749.136407	63	2710	1240.3211	93	0.449299805	129.3124137	KRMEPPKIIITDTEIS	Kd	161.575785	7.231515682	22.34328073	5.26E-07	PPKIIITDTEIS	71	full	9799.832804	full_calibration2.csv	0.006189046	0.000276998	0.063	0.161575785	0.007231516	3.432969291	-1.200659451	0.42545397	3.935066673	0.867222632	-1.552770347	0.166469051	-2.13229534	0.147540896	-2.84895188	0.185641372	-1.256043072	0.114086342	36.45608397	6.068809696
2187	7148.088744	1000	6626.5	3233.018656	98	0.457599662	328.2633095	KRMEPPKIIITDTSIS	Kd	370.9724592	47.82406771	7.75702438	0.000241347	PPKIIITDTSIS	72	full	9799.832804	full_calibration2.csv	0.002695618	0.000347507	1	0.370972459	0.047824068	3.821284202	0	0.508921062	3.832818859	0.880635408	-1.031243102	0.194536804	-1.610768095	0.17860834	-2.327424636	0.211176093	-0.734515828	0.152145708	87.84561907	17.08920596
2188	2469.853069	125	2934.75	1337.475621	84	0.465721881	146.8070218	KRMEPPKIIITDTSIS	Kd	370.9724592	47.82406771	7.75702438	0.000241347	PPKIIITDTSIS	72	full	9799.832804	full_calibration2.csv	0.002695618	0.000347507	0.125	0.370972459	0.047824068	3.467571111	-0.903089987	0.508921062	3.832818859	0.880635408	-1.031243102	0.194536804	-1.610768095	0.17860834	-2.327424636	0.211176093	-0.734515828	0.152145708	87.84561907	17.08920596
2189	8266.509184	2000	7196.5	6490.938507	84	0.703703777	712.4730619	KRMEPPKIIITDTSIS	Kd	370.9724592	47.82406771	7.75702438	0.000241347	PPKIIITDTSIS	72	full	9799.832804	full_calibration2.csv	0.002695618	0.000347507	2	0.370972459	0.047824068	3.85712133	0.301029996	0.508921062	3.832818859	0.880635408	-1.031243102	0.194536804	-1.610768095	0.17860834	-2.327424636	0.211176093	-0.734515828	0.152145708	87.84561907	17.08920596
2190	3945.357261	250	4630	1699.076592	108	0.368328737	164.2559339	KRMEPPKIIITDTSIS	Kd	370.9724592	47.82406771	7.75702438	0.000241347	PPKIIITDTSIS	72	full	9799.832804	full_calibration2.csv	0.002695618	0.000347507	0.25	0.370972459	0.047824068	3.665580991	-0.602059991	0.508921062	3.832818859	0.880635408	-1.031243102	0.194536804	-1.610768095	0.17860834	-2.327424636	0.211176093	-0.734515828	0.152145708	87.84561907	17.08920596
2191	778.2036776	32	828	326.7886841	111	0.469050404	31.15807849	KRMEPPKIIITDTSIS	Kd	370.9724592	47.82406771	7.75702438	0.000241347	PPKIIITDTSIS	72	full	9799.832804	full_calibration2.csv	0.002695618	0.000347507	0.032	0.370972459	0.047824068	2.918030337	-1.494850022	0.508921062	3.832818859	0.880635408	-1.031243102	0.194536804	-1.610768095	0.17860834	-2.327424636	0.211176093	-0.734515828	0.152145708	87.84561907	17.08920596
2192	5625.799473	500	5445	2818.128868	106	0.491169472	275.0212168	KRMEPPKIIITDTSIS	Kd	370.9724592	47.82406771	7.75702438	0.000241347	PPKIIITDTSIS	72	full	9799.832804	full_calibration2.csv	0.002695618	0.000347507	0.5	0.370972459	0.047824068	3.735997884	-0.301029996	0.508921062	3.832818859	0.880635408	-1.031243102	0.194536804	-1.610768095	0.17860834	-2.327424636	0.211176093	-0.734515828	0.152145708	87.84561907	17.08920596
2193	1422.646653	63	1684	641.7332259	90	0.402463941	68.0235859	KRMEPPKIIITDTSIS	Kd	370.9724592	47.82406771	7.75702438	0.000241347	PPKIIITDTSIS	72	full	9799.832804	full_calibration2.csv	0.002695618	0.000347507	0.063	0.370972459	0.047824068	3.226342087	-1.200659451	0.508921062	3.832818859	0.880635408	-1.031243102	0.194536804	-1.610768095	0.17860834	-2.327424636	0.211176093	-0.734515828	0.152145708	87.84561907	17.08920596
2194	7345.612228	1000	7084.75	3687.3843	122	0.478361673	335.2167546	KRMEPPKIIITDTSIS	Kd	334.1070151	27.61350499	12.09940626	1.94E-05	PPKIIITDTSIS	73	full	9799.832804	full_calibration2.csv	0.002993053	0.000247372	1	0.334107015	0.027613505	3.85032453	0	0.513651172	3.853569312	0.896153757	-1.031243102	0.194536804	-1.610768095	0.17860834	-2.327424636	0.211176093	-0.734515828	0.152145708	87.84561907	17.08920596
2195	2668.177702	125	3094	999.9599497	94	0.342256893	103.6910165	KRMEPPKIIITDTSIS	Kd	334.1070151	27.61350499	12.09940626	1.94E-05	PPKIIITDTSIS	73	full	9799.832804	full_calibration2.csv	0.002993053	0.000247372	0.125	0.334107015	0.027613505	3.490520309	-0.903089987	0.513651172	3.853569312	0.896153757	-1.031243102	0.194536804	-1.610768095	0.17860834	-2.327424636	0.211176093	-0.734515828	0.152145708	87.84561907	17.08920596
2196	8397.072406	2000	7677.75	4387.38333	68	0.503863847	536.0041836	KRMEPPKIIITDTSIS	Kd	334.1070151	27.61350499	12.09940626	1.94E-05	PPKIIITDTSIS	73	full	9799.832804	full_calibration2.csv	0.002993053	0.000247372	2	0.334107015	0.027613505	3.885233967	0.301029996	0.513651172	3.853569312	0.896153757	-1.031243102	0.194536804	-1.610768095	0.17860834	-2.327424636	0.211176093	-0.734515828	0.152145708	87.84561907	17.08920596
2197	4194.365309	250	4437.5	1539.624505	108	0.341850738	148.8411188	KRMEPPKIIITDTSIS	Kd	334.1070151	27.61350499	12.09940626	1.94E-05	PPKIIITDTSIS	73	full	9799.832804	full_calibration2.csv	0.002993053	0.000247372	0.25	0.334107015	0.027613505	3.647138366	-0.602059991	0.513651172	3.853569312	0.896153757	-1.031243102	0.194536804	-1.610768095	0.17860834	-2.327424636	0.211176093	-0.734515828	0.152145708	87.84561907	17.08920596
2198	856.5655309	32	857	302.2251399	117	0.42881551	28.06089978	KRMEPPKIIITDTSIS	Kd	334.1070151	27.61350499	12.09940626	1.94E-05	PPKIIITDTSIS	73	full	9799.832804	full_calibration2.csv	0.002993053	0.000247372	0.032	0.334107015	0.027613505	2.932980822	-1.494850022	0.513651172	3.853569312	0.896153757	-1.031243102	0.194536804	-1.610768095	0.17860834	-2.327424636	0.211176093	-0.734515828	0.152145708	87.84561907	17.08920596
2199	5874.445741	500	5712.25	2548.970628	126	0.430136009	227.9868639	KRMEPPKIIITDTSIS	Kd	334.1070151	27.61350499	12.09940626	1.94E-05	PPKIIITDTSIS	73	full	9799.832804	full_calibration2.csv	0.002993053	0.000247372	0.5	0.334107015	0.027613505	3.756807206	-0.301029996	0.513651172	3.853569312	0.896153757	-1.031243102	0.194536804	-1.610768095	0.17860834	-2.327424636	0.211176093	-0.734515828	0.152145708	87.84561907	17.08920596
2200	1554.718107	63	1796	554.3760225	92	0.335525723	58.11439782	KRMEPPKIIITDTSIS	Kd	334.1070151	27.61350499	12.09940626	1.94E-05	PPKIIITDTSIS	73	full	9799.832804	full_calibration2.csv	0.002993053	0.000247372	0.063	0.334107015	0.027613505	3.254306332	-1.200659451	0.513651172	3.853569312	0.896153757	-1.031243102	0.194536804	-1.610768095	0.17860834	-2.327424636	0.211176093	-0.734515828	0.152145708	87.84561907	17.08920596
2201	9085.566597	1000	8486.5	4347.748673	107	0.453006914	422.2906819	ASGLLPRIIITPPYEL	Kd	78.61548306	10.19406309	7.711889004	0.000249249	LPRIIITPPYEL	74	full	9799.832804	full_calibration2.csv	0.012720141	0.00164942	1	0.078615483	0.010194063	3.928728616	0	0.218945764	3.934901643	0.929444312	-1.951317684	0.195037616	-2.530842677	0.179153685	-3.247499218	0.211637534	-1.65459041	0.152785536	18.61600668	3.630821556
2202	6016.139255	125	5882.5	1732.320801	105	0.291314217	169.8680302	ASGLLPRIIITPPYEL	Kd	78.61548306	10.19406309	7.711889004	0.000249249	LPRIIITPPYEL	74	full	9799.832804	full_calibration2.csv	0.012720141	0.00164942	0.125	0.078615483	0.010194063	3.769561936	-0.903089987	0.218945764	3.934901643	0.929444312	-1.951317684	0.195037616	-2.530842677	0.179153685	-3.247499218	0.211637534	-1.65459041	0.152785536	18.61600668	3.630821556
2203	9429.192541	2000	9178	3460.582724	99	0.361385203	349.5716444	ASGLLPRIIITPPYEL	Kd	78.61548306	10.19406309	7.711889004	0.000249249	LPRIIITPPYEL	74	full	9799.832804	full_calibration2.csv	0.012720141	0.00164942	2	0.078615483	0.010194063	3.962748053	0.301029996	0.218945764	3.934901643	0.929444312	-1.951317684	0.195037616	-2.530842677	0.179153685	-3.247499218	0.211637534	-1.65459041	0.152785536	18.61600668	3.630821556
2204	7455.394914	250	6922	2878.374798	113	0.395728229	271.9808534	ASGLLPRIIITPPYEL	Kd	78.61548306	10.19406309	7.711889004	0.000249249	LPRIIITPPYEL	74	full	9799.832804	full_calibration2.csv	0.012720141	0.00164942	0.25	0.078615483	0.010194063	3.840231595	-0.602059991	0.218945764	3.934901643	0.929444312	-1.951317684	0.195037616	-2.530842677	0.179153685	-3.247499218	0.211637534	-1.65459041	0.152785536	18.61600668	3.630821556
2205	2834.997787	32	3561.75	1067.156857	90	0.316783346	113.1184006	ASGLLPRIIITPPYEL	Kd	78.61548306	10.19406309	7.711889004	0.000249249	LPRIIITPPYEL	74	full	9799.832804	full_calibration2.csv	0.012720141	0.00164942	0.032	0.078615483	0.010194063	3.551663433	-1.494850022	0.218945764	3.934901643	0.929444312	-1.951317684	0.195037616	-2.530842677	0.179153685	-3.247499218	0.211637534	-1.65459041	0.152785536	18.61600668	3.630821556
2206	8468.346502	500	7709.75	3711.744225	126	0.46550169	331.9884961	ASGLLPRIIITPPYEL	Kd	78.61548306	10.19406309	7.711889004	0.000249249	LPRIIITPPYEL	74	full	9799.832804	full_calibration2.csv	0.012720141	0.00164942	0.5	0.078615483	0.010194063	3.887040296	-0.301029996	0.218945764	3.934901643	0.929444312	-1.951317684	0.195037616	-2.530842677	0.179153685	-3.247499218	0.211637534	-1.65459041	0.152785536	18.61600668	3.630821556
2207	4359.618407	63	4837.5	1255.013904	133	0.270501462	109.2349393	ASGLLPRIIITPPYEL	Kd	78.61548306	10.19406309	7.711889004	0.000249249	LPRIIITPPYEL	74	full	9799.832804	full_calibration2.csv	0.012720141	0.00164942	0.063	0.078615483	0.010194063	3.684620978	-1.200659451	0.218945764	3.934901643	0.929444312	-1.951317684	0.195037616	-2.530842677	0.179153685	-3.247499218	0.211637534	-1.65459041	0.152785536	18.61600668	3.630821556
2208	8962.237561	1000	8357	2791.333591	83	0.318555789	308.2512282	ASGLLPRIIITPPYEL	Kd	93.45827281	14.103135	6.6267729	0.000569186	LPRIIITPPYEL	75	full	9799.832804	full_calibration2.csv	0.010699962	0.001614657	1	0.093458273	0.014103135	3.922050402	0	0.243373664	3.934222416	0.973636376	-1.951317684	0.195037616	-2.530842677	0.179153685	-3.247499218	0.211637534	-1.65459041	0.152785536	18.61600668	3.630821556
2209	5607.382521	125	5402	1725.122369	91	0.316868129	181.8438643	ASGLLPRIIITPPYEL	Kd	93.45827281	14.103135	6.6267729	0.000569186	LPRIIITPPYEL	75	full	9799.832804	full_calibration2.csv	0.010699962	0.001614657	0.125	0.093458273	0.014103135	3.73255458	-0.903089987	0.243373664	3.934222416	0.973636376	-1.951317684	0.195037616	-2.530842677	0.179153685	-3.247499218	0.211637534	-1.65459041	0.152785536	18.61600668	3.630821556
2210	9362.338797	2000	9782.5	5116.810825	84	0.490476723	561.6429537	ASGLLPRIIITPPYEL	Kd	93.45827281	14.103135	6.6267729	0.000569186	LPRIIITPPYEL	75	full	9799.832804	full_calibration2.csv	0.010699962	0.001614657	2	0.093458273	0.014103135	3.990449857	0.301029996	0.243373664	3.934222416	0.973636376	-1.951317684	0.195037616	-2.530842677	0.179153685	-3.247499218	0.211637534	-1.65459041	0.152785536	18.61600668	3.630821556
2211	7133.204802	250	6513	2542.024342	79	0.373579887	287.8275782	ASGLLPRIIITPPYEL	Kd	93.45827281	14.103135	6.6267729	0.000569186	LPRIIITPPYEL	75	full	9799.832804	full_calibration2.csv	0.010699962	0.001614657	0.25	0.093458273	0.014103135	3.813781078	-0.602059991	0.243373664	3.934222416	0.973636376	-1.951317684	0.195037616	-2.530842677	0.179153685	-3.247499218	0.211637534	-1.65459041	0.152785536	18.61600668	3.630821556
2212	2499.593233	32	3395	1102.264029	102	0.3554836	109.6793702	ASGLLPRIIITPPYEL	Kd	93.45827281	14.103135	6.6267729	0.000569186	LPRIIITPPYEL	75	full	9799.832804	full_calibration2.csv	0.010699962	0.001614657	0.032	0.093458273	0.014103135	3.530839779	-1.494850022	0.243373664	3.934222416	0.973636376	-1.951317684	0.195037616	-2.530842677	0.179153685	-3.247499218	0.211637534	-1.65459041	0.152785536	18.61600668	3.630821556
2213	8256.547472	500	7402	3253.867755	122	0.435770472	295.8061596	ASGLLPRIIITPPYEL	Kd	93.45827281	14.103135	6.6267729	0.000569186	LPRIIITPPYEL	75	full	9799.832804	full_calibration2.csv	0.010699962	0.001614657	0.5	0.093458273	0.014103135	3.869349081	-0.301029996	0.243373664	3.934222416	0.973636376	-1.951317684	0.195037616	-2.530842677	0.179153685	-3.247499218	0.211637534	-1.65459041	0.152785536	18.61600668	3.630821556
2214	3946.032738	63	4552	1404.123869	80	0.315754748	157.9762776	ASGLLPRIIITPPYEL	Kd	93.45827281	14.103135	6.6267729	0.000569186	LPRIIITPPYEL	75	full	9799.832804	full_calibration2.csv	0.010699962	0.001614657	0.063	0.093458273	0.014103135	3.658202253	-1.200659451	0.243373664	3.934222416	0.973636376	-1.951317684	0.195037616	-2.530842677	0.179153685	-3.247499218	0.211637534	-1.65459041	0.152785536	18.61600668	3.630821556
2215	495.248283	1000	617.5	245.0358288	56	0.548266198	33.04062442	ASGLSPRIEITPSHEL	Kd	18787.71687	3142.447613	5.978688965	0.000982704	SPRIEITPSHEL	76	full	9799.832804	full_calibration2.csv	5.32E-05	8.90E-06	1	18.78771687	3.142447613	2.790636962	0	0.433822539	2.766030773	0.987985444	1.296181534	0.221814208	0.71665654	0.20798537	0	0.236542421	1.592908808	0.185756	4448.897966	986.8287788
2216	64.77012843	125	228	444.3774574	87	20.67424535	47.91845358	ASGLSPRIEITPSHEL	Kd	18787.71687	3142.447613	5.978688965	0.000982704	SPRIEITPSHEL	76	full	9799.832804	full_calibration2.csv	5.32E-05	8.90E-06	0.125	18.78771687	3.142447613	2.357934847	-0.903089987	0.433822539	2.766030773	0.987985444	1.296181534	0.221814208	0.71665654	0.20798537	0	0.236542421	1.592908808	0.185756	4448.897966	986.8287788
2217	942.848401	2000	772	467.3916646	85	0.695279865	50.99661148	ASGLSPRIEITPSHEL	Kd	18787.71687	3142.447613	5.978688965	0.000982704	SPRIEITPSHEL	76	full	9799.832804	full_calibration2.csv	5.32E-05	8.90E-06	2	18.78771687	3.142447613	2.8876173	0.301029996	0.433822539	2.766030773	0.987985444	1.296181534	0.221814208	0.71665654	0.20798537	0	0.236542421	1.592908808	0.185756	4448.897966	986.8287788
2218	128.6897068	250	293.25	410.4973371	88	3.338456233	44.00993406	ASGLSPRIEITPSHEL	Kd	18787.71687	3142.447613	5.978688965	0.000982704	SPRIEITPSHEL	76	full	9799.832804	full_calibration2.csv	5.32E-05	8.90E-06	0.25	18.78771687	3.142447613	2.467238021	-0.602059991	0.433822539	2.766030773	0.987985444	1.296181534	0.221814208	0.71665654	0.20798537	0	0.236542421	1.592908808	0.185756	4448.897966	986.8287788
2219	16.66309073	32	142.5	26.66391907	67	-1.022600216	3.282101553	ASGLSPRIEITPSHEL	Kd	18787.71687	3142.447613	5.978688965	0.000982704	SPRIEITPSHEL	76	full	9799.832804	full_calibration2.csv	5.32E-05	8.90E-06	0.032	18.78771687	3.142447613	2.153814864	-1.494850022	0.433822539	2.766030773	0.987985444	1.296181534	0.221814208	0.71665654	0.20798537	0	0.236542421	1.592908808	0.185756	4448.897966	986.8287788
2220	254.0433601	500	457	204.0040881	61	0.718303522	26.33681453	ASGLSPRIEITPSHEL	Kd	18787.71687	3142.447613	5.978688965	0.000982704	SPRIEITPSHEL	76	full	9799.832804	full_calibration2.csv	5.32E-05	8.90E-06	0.5	18.78771687	3.142447613	2.6599162	-0.301029996	0.433822539	2.766030773	0.987985444	1.296181534	0.221814208	0.71665654	0.20798537	0	0.236542421	1.592908808	0.185756	4448.897966	986.8287788
2221	32.75151131	63	167	68.21061948	72	-8.888985705	8.095111209	ASGLSPRIEITPSHEL	Kd	18787.71687	3142.447613	5.978688965	0.000982704	SPRIEITPSHEL	76	full	9799.832804	full_calibration2.csv	5.32E-05	8.90E-06	0.063	18.78771687	3.142447613	2.222716471	-1.200659451	0.433822539	2.766030773	0.987985444	1.296181534	0.221814208	0.71665654	0.20798537	0	0.236542421	1.592908808	0.185756	4448.897966	986.8287788
2222	516.387266	1000	639.25	297.5369913	76	0.577542527	34.35661241	ASGLSPRIEITPSHEL	Kd	17977.681	2738.414844	6.564995451	0.000598499	SPRIEITPSHEL	77	full	9799.832804	full_calibration2.csv	5.56E-05	8.47E-06	1	17.977681	2.738414844	2.805670737	0	0.448955975	2.773550238	0.977039959	1.296181534	0.221814208	0.71665654	0.20798537	0	0.236542421	1.592908808	0.185756	4448.897966	986.8287788
2223	67.66838021	125	212.25	95.56869232	72	1.765476805	11.34191711	ASGLSPRIEITPSHEL	Kd	17977.681	2738.414844	6.564995451	0.000598499	SPRIEITPSHEL	77	full	9799.832804	full_calibration2.csv	5.56E-05	8.47E-06	0.125	17.977681	2.738414844	2.326847699	-0.903089987	0.448955975	2.773550238	0.977039959	1.296181534	0.221814208	0.71665654	0.20798537	0	0.236542421	1.592908808	0.185756	4448.897966	986.8287788
2224	981.0781148	2000	816.5	442.5012894	79	0.595342215	50.10340476	ASGLSPRIEITPSHEL	Kd	17977.681	2738.414844	6.564995451	0.000598499	SPRIEITPSHEL	77	full	9799.832804	full_calibration2.csv	5.56E-05	8.47E-06	2	17.977681	2.738414844	2.911956189	0.301029996	0.448955975	2.773550238	0.977039959	1.296181534	0.221814208	0.71665654	0.20798537	0	0.236542421	1.592908808	0.185756	4448.897966	986.8287788
2225	134.4086613	250	279	524.4851622	71	6.55895139	62.6879671	ASGLSPRIEITPSHEL	Kd	17977.681	2738.414844	6.564995451	0.000598499	SPRIEITPSHEL	77	full	9799.832804	full_calibration2.csv	5.56E-05	8.47E-06	0.25	17.977681	2.738414844	2.445604203	-0.602059991	0.448955975	2.773550238	0.977039959	1.296181534	0.221814208	0.71665654	0.20798537	0	0.236542421	1.592908808	0.185756	4448.897966	986.8287788
2226	17.41255993	32	144	631.8505448	69	-6.688813684	76.62313341	ASGLSPRIEITPSHEL	Kd	17977.681	2738.414844	6.564995451	0.000598499	SPRIEITPSHEL	77	full	9799.832804	full_calibration2.csv	5.56E-05	8.47E-06	0.032	17.977681	2.738414844	2.158362492	-1.494850022	0.448955975	2.773550238	0.977039959	1.296181534	0.221814208	0.71665654	0.20798537	0	0.236542421	1.592908808	0.185756	4448.897966	986.8287788
2227	265.1802682	500	457.5	558.1132286	65	2.520486338	69.76415358	ASGLSPRIEITPSHEL	Kd	17977.681	2738.414844	6.564995451	0.000598499	SPRIEITPSHEL	77	full	9799.832804	full_calibration2.csv	5.56E-05	8.47E-06	0.5	17.977681	2.738414844	2.660391098	-0.301029996	0.448955975	2.773550238	0.977039959	1.296181534	0.221814208	0.71665654	0.20798537	0	0.236542421	1.592908808	0.185756	4448.897966	986.8287788
2228	34.22207104	63	166	75.29768821	72	32.17467983	8.936191527	ASGLSPRIEITPSHEL	Kd	17977.681	2738.414844	6.564995451	0.000598499	SPRIEITPSHEL	77	full	9799.832804	full_calibration2.csv	5.56E-05	8.47E-06	0.063	17.977681	2.738414844	2.220108088	-1.200659451	0.448955975	2.773550238	0.977039959	1.296181534	0.221814208	0.71665654	0.20798537	0	0.236542421	1.592908808	0.185756	4448.897966	986.8287788
2229	1777.992211	1000	2188.25	843.0127143	102	0.438710698	83.88290025	ASGLSPRILITPSHEL	Kd	4511.741133	752.0377569	5.999354542	0.00096508	SPRILITPSHEL	78	full	9799.832804	full_calibration2.csv	0.000221644	3.69E-05	1	4.511741133	0.752037757	3.340096937	0	0.579584933	3.295168968	0.967832483	0.450255079	0.221380079	-0.129269914	0.207522314	-0.845926454	0.236135371	0.746982354	0.185237383	1068.372282	236.5163408
2230	264.189668	125	638.5	852.8635087	105	1.847548348	83.63014756	ASGLSPRILITPSHEL	Kd	4511.741133	752.0377569	5.999354542	0.00096508	SPRILITPSHEL	78	full	9799.832804	full_calibration2.csv	0.000221644	3.69E-05	0.125	4.511741133	0.752037757	2.805160902	-0.903089987	0.579584933	3.295168968	0.967832483	0.450255079	0.221380079	-0.129269914	0.207522314	-0.845926454	0.236135371	0.746982354	0.185237383	1068.372282	236.5163408
2231	3009.89631	2000	2355.75	1050.216541	66	0.494337626	130.26333	ASGLSPRILITPSHEL	Kd	4511.741133	752.0377569	5.999354542	0.00096508	SPRILITPSHEL	78	full	9799.832804	full_calibration2.csv	0.000221644	3.69E-05	2	4.511741133	0.752037757	3.3721292	0.301029996	0.579584933	3.295168968	0.967832483	0.450255079	0.221380079	-0.129269914	0.207522314	-0.845926454	0.236135371	0.746982354	0.185237383	1068.372282	236.5163408
2232	514.5089018	250	987.75	504.2072152	82	0.600796193	56.02302391	ASGLSPRILITPSHEL	Kd	4511.741133	752.0377569	5.999354542	0.00096508	SPRILITPSHEL	78	full	9799.832804	full_calibration2.csv	0.000221644	3.69E-05	0.25	4.511741133	0.752037757	2.994647038	-0.602059991	0.579584933	3.295168968	0.967832483	0.450255079	0.221380079	-0.129269914	0.207522314	-0.845926454	0.236135371	0.746982354	0.185237383	1068.372282	236.5163408
2233	69.0168389	32	222	92.78087012	93	1.513262175	9.673074384	ASGLSPRILITPSHEL	Kd	4511.741133	752.0377569	5.999354542	0.00096508	SPRILITPSHEL	78	full	9799.832804	full_calibration2.csv	0.000221644	3.69E-05	0.032	4.511741133	0.752037757	2.346352974	-1.494850022	0.579584933	3.295168968	0.967832483	0.450255079	0.221380079	-0.129269914	0.207522314	-0.845926454	0.236135371	0.746982354	0.185237383	1068.372282	236.5163408
2234	977.6874488	500	1423.25	1026.586871	86	0.743083308	111.34898	ASGLSPRILITPSHEL	Kd	4511.741133	752.0377569	5.999354542	0.00096508	SPRILITPSHEL	78	full	9799.832804	full_calibration2.csv	0.000221644	3.69E-05	0.5	4.511741133	0.752037757	3.153281192	-0.301029996	0.579584933	3.295168968	0.967832483	0.450255079	0.221380079	-0.129269914	0.207522314	-0.845926454	0.236135371	0.746982354	0.185237383	1068.372282	236.5163408
2235	134.9561535	63	416.75	195.2784981	80	0.707803269	21.97054756	ASGLSPRILITPSHEL	Kd	4511.741133	752.0377569	5.999354542	0.00096508	SPRILITPSHEL	78	full	9799.832804	full_calibration2.csv	0.000221644	3.69E-05	0.063	4.511741133	0.752037757	2.619875609	-1.200659451	0.579584933	3.295168968	0.967832483	0.450255079	0.221380079	-0.129269914	0.207522314	-0.845926454	0.236135371	0.746982354	0.185237383	1068.372282	236.5163408
2236	1761.09265	1000	2031.5	805.1348548	85	0.434577926	87.84741468	ASGLSPRILITPSHEL	Kd	4564.632165	771.723675	5.914853093	0.001039514	SPRILITPSHEL	79	full	9799.832804	full_calibration2.csv	0.000219076	3.70E-05	1	4.564632165	0.771723675	3.307816827	0	0.565675092	3.294178028	0.967924536	0.450255079	0.221380079	-0.129269914	0.207522314	-0.845926454	0.236135371	0.746982354	0.185237383	1068.372282	236.5163408
2237	261.2100603	125	624.5	338.4227279	89	0.701696552	36.07598401	ASGLSPRILITPSHEL	Kd	4564.632165	771.723675	5.914853093	0.001039514	SPRILITPSHEL	79	full	9799.832804	full_calibration2.csv	0.000219076	3.70E-05	0.125	4.564632165	0.771723675	2.795532443	-0.903089987	0.565675092	3.294178028	0.967924536	0.450255079	0.221380079	-0.129269914	0.207522314	-0.845926454	0.236135371	0.746982354	0.185237383	1068.372282	236.5163408
2238	2985.645671	2000	2380	1114.487312	86	0.486413877	120.8831214	ASGLSPRILITPSHEL	Kd	4564.632165	771.723675	5.914853093	0.001039514	SPRILITPSHEL	79	full	9799.832804	full_calibration2.csv	0.000219076	3.70E-05	2	4.564632165	0.771723675	3.376576957	0.301029996	0.565675092	3.294178028	0.967924536	0.450255079	0.221380079	-0.129269914	0.207522314	-0.845926454	0.236135371	0.746982354	0.185237383	1068.372282	236.5163408
2239	508.8567759	250	1098.5	716.9710017	93	0.794943885	74.74939416	ASGLSPRILITPSHEL	Kd	4564.632165	771.723675	5.914853093	0.001039514	SPRILITPSHEL	79	full	9799.832804	full_calibration2.csv	0.000219076	3.70E-05	0.25	4.564632165	0.771723675	3.040800061	-0.602059991	0.565675092	3.294178028	0.967924536	0.450255079	0.221380079	-0.129269914	0.207522314	-0.845926454	0.236135371	0.746982354	0.185237383	1068.372282	236.5163408
2240	68.22269837	32	241	74.35887179	105	0.861727448	7.291487274	ASGLSPRILITPSHEL	Kd	4564.632165	771.723675	5.914853093	0.001039514	SPRILITPSHEL	79	full	9799.832804	full_calibration2.csv	0.000219076	3.70E-05	0.032	4.564632165	0.771723675	2.382017043	-1.494850022	0.565675092	3.294178028	0.967924536	0.450255079	0.221380079	-0.129269914	0.207522314	-0.845926454	0.236135371	0.746982354	0.185237383	1068.372282	236.5163408
2241	967.4772504	500	1474.25	570.5615866	92	0.461741225	59.81110596	ASGLSPRILITPSHEL	Kd	4564.632165	771.723675	5.914853093	0.001039514	SPRILITPSHEL	79	full	9799.832804	full_calibration2.csv	0.000219076	3.70E-05	0.5	4.564632165	0.771723675	3.168571136	-0.301029996	0.565675092	3.294178028	0.967924536	0.450255079	0.221380079	-0.129269914	0.207522314	-0.845926454	0.236135371	0.746982354	0.185237383	1068.372282	236.5163408
2242	133.4136864	63	409	154.9000258	105	0.633735421	15.1891972	ASGLSPRILITPSHEL	Kd	4564.632165	771.723675	5.914853093	0.001039514	SPRILITPSHEL	79	full	9799.832804	full_calibration2.csv	0.000219076	3.70E-05	0.063	4.564632165	0.771723675	2.611723308	-1.200659451	0.565675092	3.294178028	0.967924536	0.450255079	0.221380079	-0.129269914	0.207522314	-0.845926454	0.236135371	0.746982354	0.185237383	1068.372282	236.5163408
2243	150.0925054	1000	188	178.6015292	117	3.080017528	16.58273569	ASGLSPRIAITPSHEL	Kd	64291.95295	19709.77582	3.261932227	0.017207114	SPRIAITPSHEL	80	full	9799.832804	full_calibration2.csv	1.56E-05	4.77E-06	1	64.29195295	19.70977582	2.274157849	0	0.151979378	2.273287204	0.891293438	2.025708621	0.33942387	1.446183628	0.330552469	0.729527088	0.349226771	2.322435896	0.317036768	15224.2202	5167.463745
2244	19.01640864	125	128	99.71738014	93	-1.959787902	10.39625555	ASGLSPRIAITPSHEL	Kd	64291.95295	19709.77582	3.261932227	0.017207114	SPRIAITPSHEL	80	full	9799.832804	full_calibration2.csv	1.56E-05	4.77E-06	0.125	64.29195295	19.70977582	2.10720997	-0.903089987	0.151979378	2.273287204	0.891293438	2.025708621	0.33942387	1.446183628	0.330552469	0.729527088	0.349226771	2.322435896	0.317036768	15224.2202	5167.463745
2245	295.6567839	2000	227	385.7976283	107	7.659401842	37.47197821	ASGLSPRIAITPSHEL	Kd	64291.95295	19709.77582	3.261932227	0.017207114	SPRIAITPSHEL	80	full	9799.832804	full_calibration2.csv	1.56E-05	4.77E-06	2	64.29195295	19.70977582	2.356025857	0.301029996	0.151979378	2.273287204	0.891293438	2.025708621	0.33942387	1.446183628	0.330552469	0.729527088	0.349226771	2.322435896	0.317036768	15224.2202	5167.463745
2246	37.95915818	250	144.5	93.78099739	99	-5.775625967	9.473311315	ASGLSPRIAITPSHEL	Kd	64291.95295	19709.77582	3.261932227	0.017207114	SPRIAITPSHEL	80	full	9799.832804	full_calibration2.csv	1.56E-05	4.77E-06	0.25	64.29195295	19.70977582	2.159867847	-0.602059991	0.151979378	2.273287204	0.891293438	2.025708621	0.33942387	1.446183628	0.330552469	0.729527088	0.349226771	2.322435896	0.317036768	15224.2202	5167.463745
2247	4.875239088	32	124.5	173.805827	93	-2.627642349	18.12051008	ASGLSPRIAITPSHEL	Kd	64291.95295	19709.77582	3.261932227	0.017207114	SPRIAITPSHEL	80	full	9799.832804	full_calibration2.csv	1.56E-05	4.77E-06	0.032	64.29195295	19.70977582	2.095169351	-1.494850022	0.151979378	2.273287204	0.891293438	2.025708621	0.33942387	1.446183628	0.330552469	0.729527088	0.349226771	2.322435896	0.317036768	15224.2202	5167.463745
2248	75.62538523	500	160.25	552.2339953	102	-9.411506686	54.9493363	ASGLSPRIAITPSHEL	Kd	64291.95295	19709.77582	3.261932227	0.017207114	SPRIAITPSHEL	80	full	9799.832804	full_calibration2.csv	1.56E-05	4.77E-06	0.5	64.29195295	19.70977582	2.204798038	-0.301029996	0.151979378	2.273287204	0.891293438	2.025708621	0.33942387	1.446183628	0.330552469	0.729527088	0.349226771	2.322435896	0.317036768	15224.2202	5167.463745
2249	9.593503504	63	119.5	108.6607122	109	-1.943872907	10.4558819	ASGLSPRIAITPSHEL	Kd	64291.95295	19709.77582	3.261932227	0.017207114	SPRIAITPSHEL	80	full	9799.832804	full_calibration2.csv	1.56E-05	4.77E-06	0.063	64.29195295	19.70977582	2.077367905	-1.200659451	0.151979378	2.273287204	0.891293438	2.025708621	0.33942387	1.446183628	0.330552469	0.729527088	0.349226771	2.322435896	0.317036768	15224.2202	5167.463745
2250	145.89705	1000	190.5	133.7432355	98	4.924605328	13.57956813	ASGLSPRIAITPSHEL	Kd	66169.50621	21864.69364	3.026317556	0.023207608	SPRIAITPSHEL	81	full	9799.832804	full_calibration2.csv	1.51E-05	4.99E-06	1	66.16950621	21.86469364	2.27989498	0	0.141400836	2.270704577	0.886457039	2.025708621	0.33942387	1.446183628	0.330552469	0.729527088	0.349226771	2.322435896	0.317036768	15224.2202	5167.463745
2251	18.47783731	125	123	468.6017305	85	-4.939072117	51.12864049	ASGLSPRIAITPSHEL	Kd	66169.50621	21864.69364	3.026317556	0.023207608	SPRIAITPSHEL	81	full	9799.832804	full_calibration2.csv	1.51E-05	4.99E-06	0.125	66.16950621	21.86469364	2.089905111	-0.903089987	0.141400836	2.270704577	0.886457039	2.025708621	0.33942387	1.446183628	0.330552469	0.729527088	0.349226771	2.322435896	0.317036768	15224.2202	5167.463745
2252	287.5136802	2000	211	200.7818767	69	15.54876486	24.34837898	ASGLSPRIAITPSHEL	Kd	66169.50621	21864.69364	3.026317556	0.023207608	SPRIAITPSHEL	81	full	9799.832804	full_calibration2.csv	1.51E-05	4.99E-06	2	66.16950621	21.86469364	2.324282455	0.301029996	0.141400836	2.270704577	0.886457039	2.025708621	0.33942387	1.446183628	0.330552469	0.729527088	0.349226771	2.322435896	0.317036768	15224.2202	5167.463745
2253	36.88612489	250	148.75	73.79798999	78	-5.125773125	8.410061481	ASGLSPRIAITPSHEL	Kd	66169.50621	21864.69364	3.026317556	0.023207608	SPRIAITPSHEL	81	full	9799.832804	full_calibration2.csv	1.51E-05	4.99E-06	0.25	66.16950621	21.86469364	2.172456974	-0.602059991	0.141400836	2.270704577	0.886457039	2.025708621	0.33942387	1.446183628	0.330552469	0.729527088	0.349226771	2.322435896	0.317036768	15224.2202	5167.463745
2254	4.736971524	32	126.75	572.9387772	82	-4.221301921	63.65986413	ASGLSPRIAITPSHEL	Kd	66169.50621	21864.69364	3.026317556	0.023207608	SPRIAITPSHEL	81	full	9799.832804	full_calibration2.csv	1.51E-05	4.99E-06	0.032	66.16950621	21.86469364	2.102947968	-1.494850022	0.141400836	2.270704577	0.886457039	2.025708621	0.33942387	1.446183628	0.330552469	0.729527088	0.349226771	2.322435896	0.317036768	15224.2202	5167.463745
2255	73.49561562	500	173	597.0111539	83	-7.316097116	65.9288528	ASGLSPRIAITPSHEL	Kd	66169.50621	21864.69364	3.026317556	0.023207608	SPRIAITPSHEL	81	full	9799.832804	full_calibration2.csv	1.51E-05	4.99E-06	0.5	66.16950621	21.86469364	2.238046103	-0.301029996	0.141400836	2.270704577	0.886457039	2.025708621	0.33942387	1.446183628	0.330552469	0.729527088	0.349226771	2.322435896	0.317036768	15224.2202	5167.463745
2256	9.321547711	63	124	198.9417881	55	-2.509874606	27.07254829	ASGLSPRIAITPSHEL	Kd	66169.50621	21864.69364	3.026317556	0.023207608	SPRIAITPSHEL	81	full	9799.832804	full_calibration2.csv	1.51E-05	4.99E-06	0.063	66.16950621	21.86469364	2.093421685	-1.200659451	0.141400836	2.270704577	0.886457039	2.025708621	0.33942387	1.446183628	0.330552469	0.729527088	0.349226771	2.322435896	0.317036768	15224.2202	5167.463745
2257	282.700681	1000	277	300.7432242	51	1.62710491	42.53151465	ASGLSPRIEISPSHEL	Kd	33665.04845	5979.138953	5.630417476	0.001342826	SPRIEISPSHEL	82	full	9799.832804	full_calibration2.csv	2.97E-05	5.28E-06	1	33.66504845	5.979138953	2.442479769	0	0.297461089	2.500737143	0.884969272	1.642052853	0.2297162	1.06252786	0.216392939	0.34587132	0.24396784	1.938780128	0.195123759	7971.823645	1831.257037
2258	36.25265889	125	161	247.2843648	85	-10.90488768	26.98093619	ASGLSPRIEISPSHEL	Kd	33665.04845	5979.138953	5.630417476	0.001342826	SPRIEISPSHEL	82	full	9799.832804	full_calibration2.csv	2.97E-05	5.28E-06	0.125	33.66504845	5.979138953	2.206825876	-0.903089987	0.297461089	2.500737143	0.884969272	1.642052853	0.2297162	1.06252786	0.216392939	0.34587132	0.24396784	1.938780128	0.195123759	7971.823645	1831.257037
2259	549.5482681	2000	495.25	752.2983286	72	2.531688697	89.28138579	ASGLSPRIEISPSHEL	Kd	33665.04845	5979.138953	5.630417476	0.001342826	SPRIEISPSHEL	82	full	9799.832804	full_calibration2.csv	2.97E-05	5.28E-06	2	33.66504845	5.979138953	2.694824484	0.301029996	0.297461089	2.500737143	0.884969272	1.642052853	0.2297162	1.06252786	0.216392939	0.34587132	0.24396784	1.938780128	0.195123759	7971.823645	1831.257037
2260	72.23808642	250	183	425.8994225	98	83.89576565	43.24353454	ASGLSPRIEISPSHEL	Kd	33665.04845	5979.138953	5.630417476	0.001342826	SPRIEISPSHEL	82	full	9799.832804	full_calibration2.csv	2.97E-05	5.28E-06	0.25	33.66504845	5.979138953	2.26245109	-0.602059991	0.297461089	2.500737143	0.884969272	1.642052853	0.2297162	1.06252786	0.216392939	0.34587132	0.24396784	1.938780128	0.195123759	7971.823645	1831.257037
2261	9.306294294	32	132.5	26.6475366	63	-0.761530871	3.384240532	ASGLSPRIEISPSHEL	Kd	33665.04845	5979.138953	5.630417476	0.001342826	SPRIEISPSHEL	82	full	9799.832804	full_calibration2.csv	2.97E-05	5.28E-06	0.032	33.66504845	5.979138953	2.122215878	-1.494850022	0.297461089	2.500737143	0.884969272	1.642052853	0.2297162	1.06252786	0.216392939	0.34587132	0.24396784	1.938780128	0.195123759	7971.823645	1831.257037
2262	143.41898	500	242	135.7541651	76	1.868232965	15.67554075	ASGLSPRIEISPSHEL	Kd	33665.04845	5979.138953	5.630417476	0.001342826	SPRIEISPSHEL	82	full	9799.832804	full_calibration2.csv	2.97E-05	5.28E-06	0.5	33.66504845	5.979138953	2.383815366	-0.301029996	0.297461089	2.500737143	0.884969272	1.642052853	0.2297162	1.06252786	0.216392939	0.34587132	0.24396784	1.938780128	0.195123759	7971.823645	1831.257037
2263	18.30492706	63	139	80.43056811	68	-2.391987156	9.826157815	ASGLSPRIEISPSHEL	Kd	33665.04845	5979.138953	5.630417476	0.001342826	SPRIEISPSHEL	82	full	9799.832804	full_calibration2.csv	2.97E-05	5.28E-06	0.063	33.66504845	5.979138953	2.1430148	-1.200659451	0.297461089	2.500737143	0.884969272	1.642052853	0.2297162	1.06252786	0.216392939	0.34587132	0.24396784	1.938780128	0.195123759	7971.823645	1831.257037
2264	238.9206656	1000	311	289.7382731	72	1.216429381	34.38560682	ASGLSPRIEISPSHEL	Kd	40017.09987	9352.222413	4.278886676	0.005211975	SPRIEISPSHEL	83	full	9799.832804	full_calibration2.csv	2.50E-05	5.84E-06	1	40.01709987	9.352222413	2.492760389	0	0.262105942	2.463461328	0.950488533	1.642052853	0.2297162	1.06252786	0.216392939	0.34587132	0.24396784	1.938780128	0.195123759	7971.823645	1831.257037
2265	30.51606927	125	158	40.15815222	55	13.3456095	5.464832331	ASGLSPRIEISPSHEL	Kd	40017.09987	9352.222413	4.278886676	0.005211975	SPRIEISPSHEL	83	full	9799.832804	full_calibration2.csv	2.50E-05	5.84E-06	0.125	40.01709987	9.352222413	2.198657087	-0.903089987	0.262105942	2.463461328	0.950488533	1.642052853	0.2297162	1.06252786	0.216392939	0.34587132	0.24396784	1.938780128	0.195123759	7971.823645	1831.257037
2266	466.4687869	2000	367.25	308.7207064	70	1.286221435	37.1656056	ASGLSPRIEISPSHEL	Kd	40017.09987	9352.222413	4.278886676	0.005211975	SPRIEISPSHEL	83	full	9799.832804	full_calibration2.csv	2.50E-05	5.84E-06	2	40.01709987	9.352222413	2.564961804	0.301029996	0.262105942	2.463461328	0.950488533	1.642052853	0.2297162	1.06252786	0.216392939	0.34587132	0.24396784	1.938780128	0.195123759	7971.823645	1831.257037
2267	60.84267824	250	181	278.3507804	79	-30.02008417	31.51701961	ASGLSPRIEISPSHEL	Kd	40017.09987	9352.222413	4.278886676	0.005211975	SPRIEISPSHEL	83	full	9799.832804	full_calibration2.csv	2.50E-05	5.84E-06	0.25	40.01709987	9.352222413	2.257678575	-0.602059991	0.262105942	2.463461328	0.950488533	1.642052853	0.2297162	1.06252786	0.216392939	0.34587132	0.24396784	1.938780128	0.195123759	7971.823645	1831.257037
2268	7.830254631	32	132.5	360.2772376	74	-4.248349229	42.1672612	ASGLSPRIEISPSHEL	Kd	40017.09987	9352.222413	4.278886676	0.005211975	SPRIEISPSHEL	83	full	9799.832804	full_calibration2.csv	2.50E-05	5.84E-06	0.032	40.01709987	9.352222413	2.122215878	-1.494850022	0.262105942	2.463461328	0.950488533	1.642052853	0.2297162	1.06252786	0.216392939	0.34587132	0.24396784	1.938780128	0.195123759	7971.823645	1831.257037
2269	120.9345293	500	232	350.7189746	57	10.39572624	46.86679436	ASGLSPRIEISPSHEL	Kd	40017.09987	9352.222413	4.278886676	0.005211975	SPRIEISPSHEL	83	full	9799.832804	full_calibration2.csv	2.50E-05	5.84E-06	0.5	40.01709987	9.352222413	2.365487985	-0.301029996	0.262105942	2.463461328	0.950488533	1.642052853	0.2297162	1.06252786	0.216392939	0.34587132	0.24396784	1.938780128	0.195123759	7971.823645	1831.257037
2270	15.40389043	63	138.5	141.3162548	71	-3.372022884	16.89052307	ASGLSPRIEISPSHEL	Kd	40017.09987	9352.222413	4.278886676	0.005211975	SPRIEISPSHEL	83	full	9799.832804	full_calibration2.csv	2.50E-05	5.84E-06	0.063	40.01709987	9.352222413	2.141449773	-1.200659451	0.262105942	2.463461328	0.950488533	1.642052853	0.2297162	1.06252786	0.216392939	0.34587132	0.24396784	1.938780128	0.195123759	7971.823645	1831.257037
2271	306.4441548	1000	338	379.6868422	82	2.118557503	42.18742691	ASGLSPRIEIFPSHEL	Kd	30979.18006	5161.254456	6.002257848	0.000962633	SPRIEIFPSHEL	84	full	9799.832804	full_calibration2.csv	3.23E-05	5.38E-06	1	30.97918006	5.161254456	2.5289167	0	0.319682177	2.535347586	0.901290983	1.592747991	0.22131938	1.013222997	0.20745756	0.296566457	0.236078466	1.889475265	0.185164836	7335.814784	1623.55798
2272	39.38310214	125	163.25	1727.495154	62	-5.698119307	221.1830896	ASGLSPRIEIFPSHEL	Kd	30979.18006	5161.254456	6.002257848	0.000962633	SPRIEIFPSHEL	84	full	9799.832804	full_calibration2.csv	3.23E-05	5.38E-06	0.125	30.97918006	5.161254456	2.21285319	-0.903089987	0.319682177	2.535347586	0.901290983	1.592747991	0.22131938	1.013222997	0.20745756	0.296566457	0.236078466	1.889475265	0.185164836	7335.814784	1623.55798
2273	594.3042117	2000	522.5	286.5577851	52	0.729386663	40.12611594	ASGLSPRIEIFPSHEL	Kd	30979.18006	5161.254456	6.002257848	0.000962633	SPRIEIFPSHEL	84	full	9799.832804	full_calibration2.csv	3.23E-05	5.38E-06	2	30.97918006	5.161254456	2.718086295	0.301029996	0.319682177	2.535347586	0.901290983	1.592747991	0.22131938	1.013222997	0.20745756	0.296566457	0.236078466	1.889475265	0.185164836	7335.814784	1623.55798
2274	78.45092942	250	182.5	259.3377373	55	-11.93604649	35.29139597	ASGLSPRIEIFPSHEL	Kd	30979.18006	5161.254456	6.002257848	0.000962633	SPRIEIFPSHEL	84	full	9799.832804	full_calibration2.csv	3.23E-05	5.38E-06	0.25	30.97918006	5.161254456	2.261262869	-0.602059991	0.319682177	2.535347586	0.901290983	1.592747991	0.22131938	1.013222997	0.20745756	0.296566457	0.236078466	1.889475265	0.185164836	7335.814784	1623.55798
2275	10.11230947	32	135.5	54.67936969	35	-2.405754795	9.377434538	ASGLSPRIEIFPSHEL	Kd	30979.18006	5161.254456	6.002257848	0.000962633	SPRIEIFPSHEL	84	full	9799.832804	full_calibration2.csv	3.23E-05	5.38E-06	0.032	30.97918006	5.161254456	2.131939295	-1.494850022	0.319682177	2.535347586	0.901290983	1.592747991	0.22131938	1.013222997	0.20745756	0.296566457	0.236078466	1.889475265	0.185164836	7335.814784	1623.55798
2276	155.6557824	500	247.25	129.1415096	54	1.289743206	17.73895058	ASGLSPRIEIFPSHEL	Kd	30979.18006	5161.254456	6.002257848	0.000962633	SPRIEIFPSHEL	84	full	9799.832804	full_calibration2.csv	3.23E-05	5.38E-06	0.5	30.97918006	5.161254456	2.3931363	-0.301029996	0.319682177	2.535347586	0.901290983	1.592747991	0.22131938	1.013222997	0.20745756	0.296566457	0.236078466	1.889475265	0.185164836	7335.814784	1623.55798
2277	19.88872771	63	144	31.5657518	65	-1.414528691	3.945718974	ASGLSPRIEIFPSHEL	Kd	30979.18006	5161.254456	6.002257848	0.000962633	SPRIEIFPSHEL	84	full	9799.832804	full_calibration2.csv	3.23E-05	5.38E-06	0.063	30.97918006	5.161254456	2.158362492	-1.200659451	0.319682177	2.535347586	0.901290983	1.592747991	0.22131938	1.013222997	0.20745756	0.296566457	0.236078466	1.889475265	0.185164836	7335.814784	1623.55798
2278	308.2251772	1000	358	251.7988889	109	1.237675763	24.22935938	ASGLSPRIEIFPSHEL	Kd	30794.39425	5759.416085	5.346791029	0.001749942	SPRIEIFPSHEL	85	full	9799.832804	full_calibration2.csv	3.25E-05	6.07E-06	1	30.79439425	5.759416085	2.553883027	0	0.321207491	2.556974626	0.958017427	1.592747991	0.22131938	1.013222997	0.20745756	0.296566457	0.236078466	1.889475265	0.185164836	7335.814784	1623.55798
2279	39.61847022	125	167	56.93559039	85	12.60293016	6.212182207	ASGLSPRIEIFPSHEL	Kd	30794.39425	5759.416085	5.346791029	0.001749942	SPRIEIFPSHEL	85	full	9799.832804	full_calibration2.csv	3.25E-05	6.07E-06	0.125	30.79439425	5.759416085	2.222716471	-0.903089987	0.321207491	2.556974626	0.958017427	1.592747991	0.22131938	1.013222997	0.20745756	0.296566457	0.236078466	1.889475265	0.185164836	7335.814784	1623.55798
2280	597.6529237	2000	505	272.5007709	53	0.795469314	37.78905778	ASGLSPRIEIFPSHEL	Kd	30794.39425	5759.416085	5.346791029	0.001749942	SPRIEIFPSHEL	85	full	9799.832804	full_calibration2.csv	3.25E-05	6.07E-06	2	30.79439425	5.759416085	2.703291378	0.301029996	0.321207491	2.556974626	0.958017427	1.592747991	0.22131938	1.013222997	0.20745756	0.296566457	0.236078466	1.889475265	0.185164836	7335.814784	1623.55798
2281	78.91789355	250	220.5	574.9071461	75	-24.25768549	66.83159823	ASGLSPRIEIFPSHEL	Kd	30794.39425	5759.416085	5.346791029	0.001749942	SPRIEIFPSHEL	85	full	9799.832804	full_calibration2.csv	3.25E-05	6.07E-06	0.25	30.79439425	5.759416085	2.343408594	-0.602059991	0.321207491	2.556974626	0.958017427	1.592747991	0.22131938	1.013222997	0.20745756	0.296566457	0.236078466	1.889475265	0.185164836	7335.814784	1623.55798
2282	10.17292672	32	136.75	63.49750948	58	-1.644131942	8.41045059	ASGLSPRIEIFPSHEL	Kd	30794.39425	5759.416085	5.346791029	0.001749942	SPRIEIFPSHEL	85	full	9799.832804	full_calibration2.csv	3.25E-05	6.07E-06	0.032	30.79439425	5.759416085	2.135927335	-1.494850022	0.321207491	2.556974626	0.958017427	1.592747991	0.22131938	1.013222997	0.20745756	0.296566457	0.236078466	1.889475265	0.185164836	7335.814784	1623.55798
2283	156.574892	500	268.5	592.9761943	62	26.28854061	75.92282179	ASGLSPRIEIFPSHEL	Kd	30794.39425	5759.416085	5.346791029	0.001749942	SPRIEIFPSHEL	85	full	9799.832804	full_calibration2.csv	3.25E-05	6.07E-06	0.5	30.79439425	5.759416085	2.42894429	-0.301029996	0.321207491	2.556974626	0.958017427	1.592747991	0.22131938	1.013222997	0.20745756	0.296566457	0.236078466	1.889475265	0.185164836	7335.814784	1623.55798
2284	20.00782897	63	145	96.08070712	71	-2.828832762	11.483841	ASGLSPRIEIFPSHEL	Kd	30794.39425	5759.416085	5.346791029	0.001749942	SPRIEIFPSHEL	85	full	9799.832804	full_calibration2.csv	3.25E-05	6.07E-06	0.063	30.79439425	5.759416085	2.161368002	-1.200659451	0.321207491	2.556974626	0.958017427	1.592747991	0.22131938	1.013222997	0.20745756	0.296566457	0.236078466	1.889475265	0.185164836	7335.814784	1623.55798
2285	1720.575726	1000	1845	769.6870662	71	0.424056846	91.99520018	ASGLLPRIEITPSHEL	Kd	4695.670731	738.1455207	6.361443102	0.000708082	LPRIEITPSHEL	86	full	9799.832804	full_calibration2.csv	0.000212962	3.35E-05	1	4.695670731	0.738145521	3.26599637	0	0.578128821	3.283658106	0.970037813	0.473950069	0.214327536	-0.105574925	0.199981658	-0.822231465	0.229536634	0.770677343	0.176748525	1111.926484	238.3164631
2286	254.1096807	125	616	358.4041185	72	0.74299895	42.5347434	ASGLLPRIEITPSHEL	Kd	4695.670731	738.1455207	6.361443102	0.000708082	LPRIEITPSHEL	86	full	9799.832804	full_calibration2.csv	0.000212962	3.35E-05	0.125	4.695670731	0.738145521	2.789580712	-0.903089987	0.578128821	3.283658106	0.970037813	0.473950069	0.214327536	-0.105574925	0.199981658	-0.822231465	0.229536634	0.770677343	0.176748525	1111.926484	238.3164631
2287	2927.214673	2000	2421.5	1478.942584	59	0.654514726	194.1946751	ASGLLPRIEITPSHEL	Kd	4695.670731	738.1455207	6.361443102	0.000708082	LPRIEITPSHEL	86	full	9799.832804	full_calibration2.csv	0.000212962	3.35E-05	2	4.695670731	0.738145521	3.384084473	0.301029996	0.578128821	3.283658106	0.970037813	0.473950069	0.214327536	-0.105574925	0.199981658	-0.822231465	0.229536634	0.770677343	0.176748525	1111.926484	238.3164631
2288	495.3743049	250	976.5	649.3001791	46	0.754389984	96.79195589	ASGLLPRIEITPSHEL	Kd	4695.670731	738.1455207	6.361443102	0.000708082	LPRIEITPSHEL	86	full	9799.832804	full_calibration2.csv	0.000212962	3.35E-05	0.25	4.695670731	0.738145521	2.989672248	-0.602059991	0.578128821	3.283658106	0.970037813	0.473950069	0.214327536	-0.105574925	0.199981658	-0.822231465	0.229536634	0.770677343	0.176748525	1111.926484	238.3164631
2289	66.33174507	32	219	94.26015575	56	1.165118358	12.71003681	ASGLLPRIEITPSHEL	Kd	4695.670731	738.1455207	6.361443102	0.000708082	LPRIEITPSHEL	86	full	9799.832804	full_calibration2.csv	0.000212962	3.35E-05	0.032	4.695670731	0.738145521	2.340444115	-1.494850022	0.578128821	3.283658106	0.970037813	0.473950069	0.214327536	-0.105574925	0.199981658	-0.822231465	0.229536634	0.770677343	0.176748525	1111.926484	238.3164631
2290	943.0767759	500	1531	644.5684019	60	0.515112137	83.9156583	ASGLLPRIEITPSHEL	Kd	4695.670731	738.1455207	6.361443102	0.000708082	LPRIEITPSHEL	86	full	9799.832804	full_calibration2.csv	0.000212962	3.35E-05	0.5	4.695670731	0.738145521	3.184975191	-0.301029996	0.578128821	3.283658106	0.970037813	0.473950069	0.214327536	-0.105574925	0.199981658	-0.822231465	0.229536634	0.770677343	0.176748525	1111.926484	238.3164631
2291	129.7399004	63	400.25	158.2139518	70	0.782158736	19.04672156	ASGLLPRIEITPSHEL	Kd	4695.670731	738.1455207	6.361443102	0.000708082	LPRIEITPSHEL	86	full	9799.832804	full_calibration2.csv	0.000212962	3.35E-05	0.063	4.695670731	0.738145521	2.602331341	-1.200659451	0.578128821	3.283658106	0.970037813	0.473950069	0.214327536	-0.105574925	0.199981658	-0.822231465	0.229536634	0.770677343	0.176748525	1111.926484	238.3164631
2292	1601.482691	1000	1977	818.4147182	59	0.430875273	107.4631172	ASGLLPRIEITPSHEL	Kd	5119.224927	882.853814	5.7984967	0.001152998	LPRIEITPSHEL	87	full	9799.832804	full_calibration2.csv	0.000195342	3.37E-05	1	5.119224927	0.882853814	3.296006669	0	0.551726735	3.255049824	0.967720681	0.473950069	0.214327536	-0.105574925	0.199981658	-0.822231465	0.229536634	0.770677343	0.176748525	1111.926484	238.3164631
2293	233.5863006	125	575.5	602.7000725	51	1.30640303	85.23466165	ASGLLPRIEITPSHEL	Kd	5119.224927	882.853814	5.7984967	0.001152998	LPRIEITPSHEL	87	full	9799.832804	full_calibration2.csv	0.000195342	3.37E-05	0.125	5.119224927	0.882853814	2.760045328	-0.903089987	0.551726735	3.255049824	0.967720681	0.473950069	0.214327536	-0.105574925	0.199981658	-0.822231465	0.229536634	0.770677343	0.176748525	1111.926484	238.3164631
2294	2753.061718	2000	2156.5	730.3560833	43	0.347401968	112.6963903	ASGLLPRIEITPSHEL	Kd	5119.224927	882.853814	5.7984967	0.001152998	LPRIEITPSHEL	87	full	9799.832804	full_calibration2.csv	0.000195342	3.37E-05	2	5.119224927	0.882853814	3.333749462	0.301029996	0.551726735	3.255049824	0.967720681	0.473950069	0.214327536	-0.105574925	0.199981658	-0.822231465	0.229536634	0.770677343	0.176748525	1111.926484	238.3164631
2295	456.2964365	250	987.25	546.6883561	48	0.583166645	79.74269242	ASGLLPRIEITPSHEL	Kd	5119.224927	882.853814	5.7984967	0.001152998	LPRIEITPSHEL	87	full	9799.832804	full_calibration2.csv	0.000195342	3.37E-05	0.25	5.119224927	0.882853814	2.994427142	-0.602059991	0.551726735	3.255049824	0.967720681	0.473950069	0.214327536	-0.105574925	0.199981658	-0.822231465	0.229536634	0.770677343	0.176748525	1111.926484	238.3164631
2296	60.87768524	32	226.75	102.8111225	50	1.02391318	14.68730321	ASGLLPRIEITPSHEL	Kd	5119.224927	882.853814	5.7984967	0.001152998	LPRIEITPSHEL	87	full	9799.832804	full_calibration2.csv	0.000195342	3.37E-05	0.032	5.119224927	0.882853814	2.355547296	-1.494850022	0.551726735	3.255049824	0.967720681	0.473950069	0.214327536	-0.105574925	0.199981658	-0.822231465	0.229536634	0.770677343	0.176748525	1111.926484	238.3164631
2297	871.9915051	500	1279.5	1102.848901	55	0.775373449	150.0787262	ASGLLPRIEITPSHEL	Kd	5119.224927	882.853814	5.7984967	0.001152998	LPRIEITPSHEL	87	full	9799.832804	full_calibration2.csv	0.000195342	3.37E-05	0.5	5.119224927	0.882853814	3.10704029	-0.301029996	0.551726735	3.255049824	0.967720681	0.473950069	0.214327536	-0.105574925	0.199981658	-0.822231465	0.229536634	0.770677343	0.176748525	1111.926484	238.3164631
2298	119.1359841	63	417.75	327.5940759	46	1.215758571	48.83484151	ASGLLPRIEITPSHEL	Kd	5119.224927	882.853814	5.7984967	0.001152998	LPRIEITPSHEL	87	full	9799.832804	full_calibration2.csv	0.000195342	3.37E-05	0.063	5.119224927	0.882853814	2.620916459	-1.200659451	0.551726735	3.255049824	0.967720681	0.473950069	0.214327536	-0.105574925	0.199981658	-0.822231465	0.229536634	0.770677343	0.176748525	1111.926484	238.3164631
2299	397.2709942	1000	435.5	232.3639383	75	0.76271589	27.01175916	ASGLSPRIEITPFHEL	Kd	23667.87897	3154.386397	7.503164164	0.000289893	SPRIEITPFHEL	88	full	9799.832804	full_calibration2.csv	4.23E-05	5.63E-06	1	23.66787897	3.154386397	2.638988159	0	0.387410762	2.635773025	0.92194019	1.433114433	0.197454226	0.853589439	0.181781579	0.136932899	0.213866653	1.729841707	0.155858653	5604.511679	1106.634513
2300	51.4851146	125	161	115.1433891	99	-12.69398165	11.63123875	ASGLSPRIEITPFHEL	Kd	23667.87897	3154.386397	7.503164164	0.000289893	SPRIEITPFHEL	88	full	9799.832804	full_calibration2.csv	4.23E-05	5.63E-06	0.125	23.66787897	3.154386397	2.206825876	-0.903089987	0.387410762	2.635773025	0.92194019	1.433114433	0.197454226	0.853589439	0.181781579	0.136932899	0.213866653	1.729841707	0.155858653	5604.511679	1106.634513
2301	763.5872692	2000	685.5	381.6823936	75	0.753598155	44.36967701	ASGLSPRIEITPFHEL	Kd	23667.87897	3154.386397	7.503164164	0.000289893	SPRIEITPFHEL	88	full	9799.832804	full_calibration2.csv	4.23E-05	5.63E-06	2	23.66787897	3.154386397	2.836007459	0.301029996	0.387410762	2.635773025	0.92194019	1.433114433	0.197454226	0.853589439	0.181781579	0.136932899	0.213866653	1.729841707	0.155858653	5604.511679	1106.634513
2302	102.4320846	250	222	553.9906476	86	13.55039696	60.08872241	ASGLSPRIEITPFHEL	Kd	23667.87897	3154.386397	7.503164164	0.000289893	SPRIEITPFHEL	88	full	9799.832804	full_calibration2.csv	4.23E-05	5.63E-06	0.25	23.66787897	3.154386397	2.346352974	-0.602059991	0.387410762	2.635773025	0.92194019	1.433114433	0.197454226	0.853589439	0.181781579	0.136932899	0.213866653	1.729841707	0.155858653	5604.511679	1106.634513
2303	13.23190933	32	137	94.76360674	74	-2.463121496	11.09124124	ASGLSPRIEITPFHEL	Kd	23667.87897	3154.386397	7.503164164	0.000289893	SPRIEITPFHEL	88	full	9799.832804	full_calibration2.csv	4.23E-05	5.63E-06	0.032	23.66787897	3.154386397	2.136720567	-1.494850022	0.387410762	2.635773025	0.92194019	1.433114433	0.197454226	0.853589439	0.181781579	0.136932899	0.213866653	1.729841707	0.155858653	5604.511679	1106.634513
2304	202.7449909	500	291.75	403.4252345	78	5.378543422	45.97457228	ASGLSPRIEITPFHEL	Kd	23667.87897	3154.386397	7.503164164	0.000289893	SPRIEITPFHEL	88	full	9799.832804	full_calibration2.csv	4.23E-05	5.63E-06	0.5	23.66787897	3.154386397	2.465010865	-0.301029996	0.387410762	2.635773025	0.92194019	1.433114433	0.197454226	0.853589439	0.181781579	0.136932899	0.213866653	1.729841707	0.155858653	5604.511679	1106.634513
2305	26.01629158	63	156	39.3290681	61	-6.296779933	5.07736086	ASGLSPRIEITPFHEL	Kd	23667.87897	3154.386397	7.503164164	0.000289893	SPRIEITPFHEL	88	full	9799.832804	full_calibration2.csv	4.23E-05	5.63E-06	0.063	23.66787897	3.154386397	2.193124598	-1.200659451	0.387410762	2.635773025	0.92194019	1.433114433	0.197454226	0.853589439	0.181781579	0.136932899	0.213866653	1.729841707	0.155858653	5604.511679	1106.634513
2306	364.2371719	1000	480	451.9652477	47	1.514121433	66.63864023	ASGLSPRIEITPFHEL	Kd	25905.08702	4592.29187	5.640993158	0.001329881	SPRIEITPFHEL	89	full	9799.832804	full_calibration2.csv	3.86E-05	6.84E-06	1	25.90508702	4.59229187	2.681241237	0	0.377671216	2.629370826	0.953782172	1.433114433	0.197454226	0.853589439	0.181781579	0.136932899	0.213866653	1.729841707	0.155858653	5604.511679	1106.634513
2307	47.06012314	125	178.5	108.8678799	88	11.99045485	11.67186186	ASGLSPRIEITPFHEL	Kd	25905.08702	4592.29187	5.640993158	0.001329881	SPRIEITPFHEL	89	full	9799.832804	full_calibration2.csv	3.86E-05	6.84E-06	0.125	25.90508702	4.59229187	2.25163822	-0.903089987	0.377671216	2.629370826	0.953782172	1.433114433	0.197454226	0.853589439	0.181781579	0.136932899	0.213866653	1.729841707	0.155858653	5604.511679	1106.634513
2308	702.368912	2000	568.5	353.5806503	57	0.727794925	47.24920185	ASGLSPRIEITPFHEL	Kd	25905.08702	4592.29187	5.640993158	0.001329881	SPRIEITPFHEL	89	full	9799.832804	full_calibration2.csv	3.86E-05	6.84E-06	2	25.90508702	4.59229187	2.754730469	0.301029996	0.377671216	2.629370826	0.953782172	1.433114433	0.197454226	0.853589439	0.181781579	0.136932899	0.213866653	1.729841707	0.155858653	5604.511679	1106.634513
2309	93.67042822	250	214	652.2132694	81	-80.77870768	72.91966031	ASGLSPRIEITPFHEL	Kd	25905.08702	4592.29187	5.640993158	0.001329881	SPRIEITPFHEL	89	full	9799.832804	full_calibration2.csv	3.86E-05	6.84E-06	0.25	25.90508702	4.59229187	2.330413773	-0.602059991	0.377671216	2.629370826	0.953782172	1.433114433	0.197454226	0.853589439	0.181781579	0.136932899	0.213866653	1.729841707	0.155858653	5604.511679	1106.634513
2310	12.09058864	32	136	132.0003448	70	-2.68059882	15.89097411	ASGLSPRIEITPFHEL	Kd	25905.08702	4592.29187	5.640993158	0.001329881	SPRIEITPFHEL	89	full	9799.832804	full_calibration2.csv	3.86E-05	6.84E-06	0.032	25.90508702	4.59229187	2.133538908	-1.494850022	0.377671216	2.629370826	0.953782172	1.433114433	0.197454226	0.853589439	0.181781579	0.136932899	0.213866653	1.729841707	0.155858653	5604.511679	1106.634513
2311	185.5671371	500	323	123.6475322	60	0.651576667	16.09753756	ASGLSPRIEITPFHEL	Kd	25905.08702	4592.29187	5.640993158	0.001329881	SPRIEITPFHEL	89	full	9799.832804	full_calibration2.csv	3.86E-05	6.84E-06	0.5	25.90508702	4.59229187	2.509202522	-0.301029996	0.377671216	2.629370826	0.953782172	1.433114433	0.197454226	0.853589439	0.181781579	0.136932899	0.213866653	1.729841707	0.155858653	5604.511679	1106.634513
2312	23.7749306	63	144	175.3843826	60	-2.977663542	22.83310178	ASGLSPRIEITPFHEL	Kd	25905.08702	4592.29187	5.640993158	0.001329881	SPRIEITPFHEL	89	full	9799.832804	full_calibration2.csv	3.86E-05	6.84E-06	0.063	25.90508702	4.59229187	2.158362492	-1.200659451	0.377671216	2.629370826	0.953782172	1.433114433	0.197454226	0.853589439	0.181781579	0.136932899	0.213866653	1.729841707	0.155858653	5604.511679	1106.634513
2313	473.1512901	1000	614	359.3138632	75	0.79036088	41.76938816	ASGLSPRIEITASHEL	Kd	19711.83786	2852.008339	6.911563893	0.000453689	SPRIEITASHEL	90	full	9799.832804	full_calibration2.csv	5.07E-05	7.34E-06	1	19.71183786	2.852008339	2.788168371	0	0.446695157	2.729038664	0.970531041	1.324655059	0.205326933	0.745130066	0.190303759	0.028473526	0.221155881	1.621382334	0.165719335	4667.728174	958.4103105
2314	61.75274049	125	196.25	338.1122222	68	-26.03808732	41.30698231	ASGLSPRIEITASHEL	Kd	19711.83786	2852.008339	6.911563893	0.000453689	SPRIEITASHEL	90	full	9799.832804	full_calibration2.csv	5.07E-05	7.34E-06	0.125	19.71183786	2.852008339	2.292809665	-0.903089987	0.446695157	2.729038664	0.970531041	1.324655059	0.205326933	0.745130066	0.190303759	0.028473526	0.221155881	1.621382334	0.165719335	4667.728174	958.4103105
2315	902.7179428	2000	756	423.4246276	62	0.711647675	54.2139682	ASGLSPRIEITASHEL	Kd	19711.83786	2852.008339	6.911563893	0.000453689	SPRIEITASHEL	90	full	9799.832804	full_calibration2.csv	5.07E-05	7.34E-06	2	19.71183786	2.852008339	2.878521796	0.301029996	0.446695157	2.729038664	0.970531041	1.324655059	0.205326933	0.745130066	0.190303759	0.028473526	0.221155881	1.621382334	0.165719335	4667.728174	958.4103105
2316	122.732096	250	265.5	789.0026049	79	2112.92223	89.33695294	ASGLSPRIEITASHEL	Kd	19711.83786	2852.008339	6.911563893	0.000453689	SPRIEITASHEL	90	full	9799.832804	full_calibration2.csv	5.07E-05	7.34E-06	0.25	19.71183786	2.852008339	2.424064525	-0.602059991	0.446695157	2.729038664	0.970531041	1.324655059	0.205326933	0.745130066	0.190303759	0.028473526	0.221155881	1.621382334	0.165719335	4667.728174	958.4103105
2317	15.88316577	32	132.75	996.4728811	62	-6.212611858	127.5852786	ASGLSPRIEITASHEL	Kd	19711.83786	2852.008339	6.911563893	0.000453689	SPRIEITASHEL	90	full	9799.832804	full_calibration2.csv	5.07E-05	7.34E-06	0.032	19.71183786	2.852008339	2.12303453	-1.494850022	0.446695157	2.729038664	0.970531041	1.324655059	0.205326933	0.745130066	0.190303759	0.028473526	0.221155881	1.621382334	0.165719335	4667.728174	958.4103105
2318	242.4280482	500	351.25	698.1737619	66	5.230656483	86.59779725	ASGLSPRIEITASHEL	Kd	19711.83786	2852.008339	6.911563893	0.000453689	SPRIEITASHEL	90	full	9799.832804	full_calibration2.csv	5.07E-05	7.34E-06	0.5	19.71183786	2.852008339	2.545616333	-0.301029996	0.446695157	2.729038664	0.970531041	1.324655059	0.205326933	0.745130066	0.190303759	0.028473526	0.221155881	1.621382334	0.165719335	4667.728174	958.4103105
2319	31.22096227	63	149.5	87.80300498	87	-3.738126466	9.468041523	ASGLSPRIEITASHEL	Kd	19711.83786	2852.008339	6.911563893	0.000453689	SPRIEITASHEL	90	full	9799.832804	full_calibration2.csv	5.07E-05	7.34E-06	0.063	19.71183786	2.852008339	2.174641193	-1.200659451	0.446695157	2.729038664	0.970531041	1.324655059	0.205326933	0.745130066	0.190303759	0.028473526	0.221155881	1.621382334	0.165719335	4667.728174	958.4103105
2320	521.1467386	1000	618	448.6233298	70	1.010022935	54.00790227	ASGLSPRIEITASHEL	Kd	17804.36368	2014.64466	8.837470962	0.000116648	SPRIEITASHEL	91	full	9799.832804	full_calibration2.csv	5.62E-05	6.36E-06	1	17.80436368	2.01464466	2.790988475	0	0.461383163	2.747044988	0.946230689	1.324655059	0.205326933	0.745130066	0.190303759	0.028473526	0.221155881	1.621382334	0.165719335	4667.728174	958.4103105
2321	68.32250838	125	192	148.7218546	68	11.56442094	18.16926634	ASGLSPRIEITASHEL	Kd	17804.36368	2014.64466	8.837470962	0.000116648	SPRIEITASHEL	91	full	9799.832804	full_calibration2.csv	5.62E-05	6.36E-06	0.125	17.80436368	2.01464466	2.283301229	-0.903089987	0.461383163	2.747044988	0.946230689	1.324655059	0.205326933	0.745130066	0.190303759	0.028473526	0.221155881	1.621382334	0.165719335	4667.728174	958.4103105
2322	989.6639913	2000	876.5	411.7492078	64	0.554217828	51.87552412	ASGLSPRIEITASHEL	Kd	17804.36368	2014.64466	8.837470962	0.000116648	SPRIEITASHEL	91	full	9799.832804	full_calibration2.csv	5.62E-05	6.36E-06	2	17.80436368	2.01464466	2.94275192	0.301029996	0.461383163	2.747044988	0.946230689	1.324655059	0.205326933	0.745130066	0.190303759	0.028473526	0.221155881	1.621382334	0.165719335	4667.728174	958.4103105
2323	135.6989504	250	240.5	367.3390786	67	10.7686363	45.21631488	ASGLSPRIEITASHEL	Kd	17804.36368	2014.64466	8.837470962	0.000116648	SPRIEITASHEL	91	full	9799.832804	full_calibration2.csv	5.62E-05	6.36E-06	0.25	17.80436368	2.01464466	2.381115081	-0.602059991	0.461383163	2.747044988	0.946230689	1.324655059	0.205326933	0.745130066	0.190303759	0.028473526	0.221155881	1.621382334	0.165719335	4667.728174	958.4103105
2324	17.58175911	32	139	53.74829128	77	-1.599466059	6.165351845	ASGLSPRIEITASHEL	Kd	17804.36368	2014.64466	8.837470962	0.000116648	SPRIEITASHEL	91	full	9799.832804	full_calibration2.csv	5.62E-05	6.36E-06	0.032	17.80436368	2.01464466	2.1430148	-1.494850022	0.461383163	2.747044988	0.946230689	1.324655059	0.205326933	0.745130066	0.190303759	0.028473526	0.221155881	1.621382334	0.165719335	4667.728174	958.4103105
2325	267.691163	500	360.5	365.3126738	57	2.599441035	48.81695944	ASGLSPRIEITASHEL	Kd	17804.36368	2014.64466	8.837470962	0.000116648	SPRIEITASHEL	91	full	9799.832804	full_calibration2.csv	5.62E-05	6.36E-06	0.5	17.80436368	2.01464466	2.556905269	-0.301029996	0.461383163	2.747044988	0.946230689	1.324655059	0.205326933	0.745130066	0.190303759	0.028473526	0.221155881	1.621382334	0.165719335	4667.728174	958.4103105
2326	34.55403257	63	156	25.82939828	73	-1.95292188	3.04402378	ASGLSPRIEITASHEL	Kd	17804.36368	2014.64466	8.837470962	0.000116648	SPRIEITASHEL	91	full	9799.832804	full_calibration2.csv	5.62E-05	6.36E-06	0.063	17.80436368	2.01464466	2.193124598	-1.200659451	0.461383163	2.747044988	0.946230689	1.324655059	0.205326933	0.745130066	0.190303759	0.028473526	0.221155881	1.621382334	0.165719335	4667.728174	958.4103105
2327	776.3302801	1000	870.25	324.3842575	82	0.452869374	36.04269528	ASGLSPRIEITPSSEL	Kd	11623.27782	1211.512608	9.594021345	7.33E-05	SPRIEITPSSEL	92	full	9799.832804	full_calibration2.csv	8.60E-05	8.97E-06	1	11.62327782	1.211512608	2.939644032	0	0.537876034	2.926125727	0.990257424	1.011426787	0.179135721	0.431901793	0.161697179	-0.284754747	0.19707963	1.308154061	0.13188387	2752.371531	493.0480592
2328	104.268823	125	250.75	96.29378658	90	0.867772183	10.20712096	ASGLSPRIEITPSSEL	Kd	11623.27782	1211.512608	9.594021345	7.33E-05	SPRIEITPSSEL	92	full	9799.832804	full_calibration2.csv	8.60E-05	8.97E-06	0.125	11.62327782	1.211512608	2.399240942	-0.903089987	0.537876034	2.926125727	0.990257424	1.011426787	0.179135721	0.431901793	0.161697179	-0.284754747	0.19707963	1.308154061	0.13188387	2752.371531	493.0480592
2329	1438.689416	2000	1284.25	1154.543466	54	1.150729012	158.5887415	ASGLSPRIEITPSSEL	Kd	11623.27782	1211.512608	9.594021345	7.33E-05	SPRIEITPSSEL	92	full	9799.832804	full_calibration2.csv	8.60E-05	8.97E-06	2	11.62327782	1.211512608	3.108649574	0.301029996	0.537876034	2.926125727	0.990257424	1.011426787	0.179135721	0.431901793	0.161697179	-0.284754747	0.19707963	1.308154061	0.13188387	2752.371531	493.0480592
2330	206.3421945	250	396.75	285.488403	82	1.20097725	31.72093366	ASGLSPRIEITPSSEL	Kd	11623.27782	1211.512608	9.594021345	7.33E-05	SPRIEITPSSEL	92	full	9799.832804	full_calibration2.csv	8.60E-05	8.97E-06	0.25	11.62327782	1.211512608	2.598516935	-0.602059991	0.537876034	2.926125727	0.990257424	1.011426787	0.179135721	0.431901793	0.161697179	-0.284754747	0.19707963	1.308154061	0.13188387	2752.371531	493.0480592
2331	26.90580651	32	149.5	512.6733888	73	-6.846274102	60.41913829	ASGLSPRIEITPSSEL	Kd	11623.27782	1211.512608	9.594021345	7.33E-05	SPRIEITPSSEL	92	full	9799.832804	full_calibration2.csv	8.60E-05	8.97E-06	0.032	11.62327782	1.211512608	2.174641193	-1.494850022	0.537876034	2.926125727	0.990257424	1.011426787	0.179135721	0.431901793	0.161697179	-0.284754747	0.19707963	1.308154061	0.13188387	2752.371531	493.0480592
2332	404.1742238	500	556	272.6541004	75	0.644348927	31.69539537	ASGLSPRIEITPSSEL	Kd	11623.27782	1211.512608	9.594021345	7.33E-05	SPRIEITPSSEL	92	full	9799.832804	full_calibration2.csv	8.60E-05	8.97E-06	0.5	11.62327782	1.211512608	2.745074792	-0.301029996	0.537876034	2.926125727	0.990257424	1.011426787	0.179135721	0.431901793	0.161697179	-0.284754747	0.19707963	1.308154061	0.13188387	2752.371531	493.0480592
2333	52.83029176	63	181	540.3831577	67	-10.3076645	66.51656858	ASGLSPRIEITPSSEL	Kd	11623.27782	1211.512608	9.594021345	7.33E-05	SPRIEITPSSEL	92	full	9799.832804	full_calibration2.csv	8.60E-05	8.97E-06	0.063	11.62327782	1.211512608	2.257678575	-1.200659451	0.537876034	2.926125727	0.990257424	1.011426787	0.179135721	0.431901793	0.161697179	-0.284754747	0.19707963	1.308154061	0.13188387	2752.371531	493.0480592
2334	750.5930343	1000	937.75	324.6043853	56	0.420311585	43.76964638	ASGLSPRIEITPSSEL	Kd	12056.1201	1498.625351	8.044785908	0.000197256	SPRIEITPSSEL	93	full	9799.832804	full_calibration2.csv	8.29E-05	1.03E-05	1	12.0561201	1.498625351	2.972087073	0	0.524448846	2.917960785	0.977223718	1.011426787	0.179135721	0.431901793	0.161697179	-0.284754747	0.19707963	1.308154061	0.13188387	2752.371531	493.0480592
2335	100.5637487	125	257	116.249016	70	1.331059315	13.99473696	ASGLSPRIEITPSSEL	Kd	12056.1201	1498.625351	8.044785908	0.000197256	SPRIEITPSSEL	93	full	9799.832804	full_calibration2.csv	8.29E-05	1.03E-05	0.125	12.0561201	1.498625351	2.409933123	-0.903089987	0.524448846	2.917960785	0.977223718	1.011426787	0.179135721	0.431901793	0.161697179	-0.284754747	0.19707963	1.308154061	0.13188387	2752.371531	493.0480592
2336	1394.386606	2000	1193.5	575.9140173	56	0.541586159	77.65623025	ASGLSPRIEITPSSEL	Kd	12056.1201	1498.625351	8.044785908	0.000197256	SPRIEITPSSEL	93	full	9799.832804	full_calibration2.csv	8.29E-05	1.03E-05	2	12.0561201	1.498625351	3.076822423	0.301029996	0.524448846	2.917960785	0.977223718	1.011426787	0.179135721	0.431901793	0.161697179	-0.284754747	0.19707963	1.308154061	0.13188387	2752.371531	493.0480592
2337	199.0845352	250	423.5	230.7735518	58	1.050947394	30.56670366	ASGLSPRIEITPSSEL	Kd	12056.1201	1498.625351	8.044785908	0.000197256	SPRIEITPSSEL	93	full	9799.832804	full_calibration2.csv	8.29E-05	1.03E-05	0.25	12.0561201	1.498625351	2.626853415	-0.602059991	0.524448846	2.917960785	0.977223718	1.011426787	0.179135721	0.431901793	0.161697179	-0.284754747	0.19707963	1.308154061	0.13188387	2752.371531	493.0480592
2338	25.94238368	32	155.25	20.24038918	52	-1.565056115	2.834221387	ASGLSPRIEITPSSEL	Kd	12056.1201	1498.625351	8.044785908	0.000197256	SPRIEITPSSEL	93	full	9799.832804	full_calibration2.csv	8.29E-05	1.03E-05	0.032	12.0561201	1.498625351	2.191031609	-1.494850022	0.524448846	2.917960785	0.977223718	1.011426787	0.179135721	0.431901793	0.161697179	-0.284754747	0.19707963	1.308154061	0.13188387	2752.371531	493.0480592
2339	390.2412817	500	501	310.3894337	64	0.785935936	39.10539291	ASGLSPRIEITPSSEL	Kd	12056.1201	1498.625351	8.044785908	0.000197256	SPRIEITPSSEL	93	full	9799.832804	full_calibration2.csv	8.29E-05	1.03E-05	0.5	12.0561201	1.498625351	2.699837726	-0.301029996	0.524448846	2.917960785	0.977223718	1.011426787	0.179135721	0.431901793	0.161697179	-0.284754747	0.19707963	1.308154061	0.13188387	2752.371531	493.0480592
2340	50.9434234	63	176.25	112.8321574	38	3.507257244	18.54949241	ASGLSPRIEITPSSEL	Kd	12056.1201	1498.625351	8.044785908	0.000197256	SPRIEITPSSEL	93	full	9799.832804	full_calibration2.csv	8.29E-05	1.03E-05	0.063	12.0561201	1.498625351	2.246129126	-1.200659451	0.524448846	2.917960785	0.977223718	1.011426787	0.179135721	0.431901793	0.161697179	-0.284754747	0.19707963	1.308154061	0.13188387	2752.371531	493.0480592
2341	8633.554532	1000	8471	2790.361422	93	0.319100594	290.9152884	ASGLSPRIHITPSHEL	Kd	135.0866862	11.83833791	11.41095035	2.72E-05	SPRIHITPSHEL	94	full	9799.832804	full_calibration2.csv	0.007402654	0.000648732	1	0.135086686	0.011838338	3.927934682	0	0.364408107	3.944905049	0.913230702	-1.630298304	0.170015583	-2.209823298	0.151531085	-2.926479838	0.188828156	-1.33357103	0.119201708	31.98828722	5.438507314
2342	4709.887763	125	4912.5	1949.058141	79	0.422521766	220.6873771	ASGLSPRIHITPSHEL	Kd	135.0866862	11.83833791	11.41095035	2.72E-05	SPRIHITPSHEL	94	full	9799.832804	full_calibration2.csv	0.007402654	0.000648732	0.125	0.135086686	0.011838338	3.691302563	-0.903089987	0.364408107	3.944905049	0.913230702	-1.630298304	0.170015583	-2.209823298	0.151531085	-2.926479838	0.188828156	-1.33357103	0.119201708	31.98828722	5.438507314
2343	9179.798523	2000	9838.5	3766.656216	88	0.375383559	403.8279343	ASGLSPRIHITPSHEL	Kd	135.0866862	11.83833791	11.41095035	2.72E-05	SPRIHITPSHEL	94	full	9799.832804	full_calibration2.csv	0.007402654	0.000648732	2	0.135086686	0.011838338	3.99292889	0.301029996	0.364408107	3.944905049	0.913230702	-1.630298304	0.170015583	-2.209823298	0.151531085	-2.926479838	0.188828156	-1.33357103	0.119201708	31.98828722	5.438507314
2344	6362.095313	250	5801.5	2222.046105	80	0.364207908	249.9997188	ASGLSPRIHITPSHEL	Kd	135.0866862	11.83833791	11.41095035	2.72E-05	SPRIHITPSHEL	94	full	9799.832804	full_calibration2.csv	0.007402654	0.000648732	0.25	0.135086686	0.011838338	3.763540297	-0.602059991	0.364408107	3.944905049	0.913230702	-1.630298304	0.170015583	-2.209823298	0.151531085	-2.926479838	0.188828156	-1.33357103	0.119201708	31.98828722	5.438507314
2345	1876.838047	32	1952.75	894.0985958	94	0.468398816	92.71370542	ASGLSPRIHITPSHEL	Kd	135.0866862	11.83833791	11.41095035	2.72E-05	SPRIHITPSHEL	94	full	9799.832804	full_calibration2.csv	0.007402654	0.000648732	0.032	0.135086686	0.011838338	3.290646646	-1.494850022	0.364408107	3.944905049	0.913230702	-1.630298304	0.170015583	-2.209823298	0.151531085	-2.926479838	0.188828156	-1.33357103	0.119201708	31.98828722	5.438507314
2346	7715.350532	500	7494	2535.843331	133	0.355892626	220.7168314	ASGLSPRIHITPSHEL	Kd	135.0866862	11.83833791	11.41095035	2.72E-05	SPRIHITPSHEL	94	full	9799.832804	full_calibration2.csv	0.007402654	0.000648732	0.5	0.135086686	0.011838338	3.874713689	-0.301029996	0.364408107	3.944905049	0.913230702	-1.630298304	0.170015583	-2.209823298	0.151531085	-2.926479838	0.188828156	-1.33357103	0.119201708	31.98828722	5.438507314
2347	3116.764072	63	3487.5	1156.746987	89	0.336000816	123.3096432	ASGLSPRIHITPSHEL	Kd	135.0866862	11.83833791	11.41095035	2.72E-05	SPRIHITPSHEL	94	full	9799.832804	full_calibration2.csv	0.007402654	0.000648732	0.063	0.135086686	0.011838338	3.542514216	-1.200659451	0.364408107	3.944905049	0.913230702	-1.630298304	0.170015583	-2.209823298	0.151531085	-2.926479838	0.188828156	-1.33357103	0.119201708	31.98828722	5.438507314
