# Supplementary material for: Quantitative mapping of protein-peptide affinity landscapes using spectrally encoded beads
Source: eLife journal article supplement (doi:10.7554/elife.40499), 2019-07-08
Supplement: supp [file elife-40499-supp-v1.zip › elife_poa_e40499_Figure_6_source_data_1.csv]

Peptide	Data	Replicate
EGFPc1 vector (DMSO)	0.999997238	1
PVIVIT	0.188509109	1
PKIVIT	0.059644304	1
PRIEIT (NFAT)	0.52071348	1
IAIIIT (AKAP)	0.441832565	1
EGFPc1 vector (FK506)	0.089996673	1
EGFPc1 vector (DMSO)	0.999983106	2
PVIVIT	0.14001583	2
PKIVIT	0.088382451	2
PRIEIT (NFAT)	0.366507244	2
IAIIIT (AKAP)	0.45943688	2
EGFPc1 vector (FK506)	0.086159411	2
EGFPc1 vector (DMSO)	1	3
PVIVIT	0.143443119	3
PKIVIT	0.06783956	3
PRIEIT (NFAT)	0.55218711	3
IAIIIT (AKAP)	0.42145782	3
EGFPc1 vector (FK506)	0.09187534	3
