# Supplementary material for: Quantitative mapping of protein-peptide affinity landscapes using spectrally encoded beads
Source: eLife journal article supplement (doi:10.7554/elife.40499), 2019-07-08
Supplement: supp [file elife-40499-supp-v1.zip › elife_poa_e40499_Figure_6_source_data_2.csv]

Peptide	Data	Replicate
EGFPc1	1.000000029	1
PKIVIT	0.069685428	1
IPKIVIT	0.040860074	1
EPKIVIT	0.336115048	1
PKIVITgpD	0.032977301	1
PKIIIT	0.034195935	1
EGFPc1	1.000000343	2
PKIVIT	0.052785127	2
IPKIVIT	0.051989524	2
EPKIVIT	0.47245489	2
PKIVITgpD	0.047356672	2
PKIIIT	0.047425889	2
EGFPc1	1	3
PKIVIT	0.05005305	3
IPKIVIT	0.034222248	3
EPKIVIT	0.206360355	3
PKIVITgpD	0.036111432	3
PKIIIT	0.081831196	3
EGFPc1	1	4
PKIVIT	0.050091238	4
IPKIVIT	0.026048541	4
EPKIVIT	0.131213747	4
PKIVITgpD	0.021957668	4
PKIIIT	0.076167148	4
