# Supplementary material for: Quantitative mapping of protein-peptide affinity landscapes using spectrally encoded beads
Source: eLife journal article supplement (doi:10.7554/elife.40499), 2019-07-08
Supplement: supp [file elife-40499-supp-v1.zip › elife_poa_e40499_Figure_6_source_data_3.csv]

Peptide	Data	Replicate
eGFP Vector	0.999999976	1
PVIVIT	0.112742333	1
PVIVITgpD	0.051574576	1
AKAP-WT	0.442525051	1
AKAPmut (IA-PK)	0.044293469	1
NFAT-WT	0.417046318	1
LPRIEIT	0.223764059	1
DPRIEIT	0.525270411	1
PRIHIT	0.960804609	1
eGFP Vector	0.999999927	2
PVIVIT	0.124845742	2
PVIVITgpD	0.055113027	2
AKAP-WT	0.424876884	2
AKAPmut (IA-PK)	0.042376955	2
NFAT-WT	0.394473274	2
LPRIEIT	0.153287365	2
DPRIEIT	0.529913233	2
PRIHIT	0.762977286	2
eGFP Vector	1	3
PVIVIT	0.164095247	3
PVIVITgpD	0.051373665	3
AKAP-WT	0.380869878	3
AKAPmut (IA-PK)	0.031460093	3
NFAT-WT	0.558921677	3
LPRIEIT	0.18287169	3
DPRIEIT	0.6621678	3
PRIHIT	0.88241765	3
