# Supplementary figures and images for: Quantitative mapping of protein-peptide affinity landscapes using spectrally encoded beads
Source: eLife journal article supplement (doi:10.7554/elife.40499), 2019-07-08

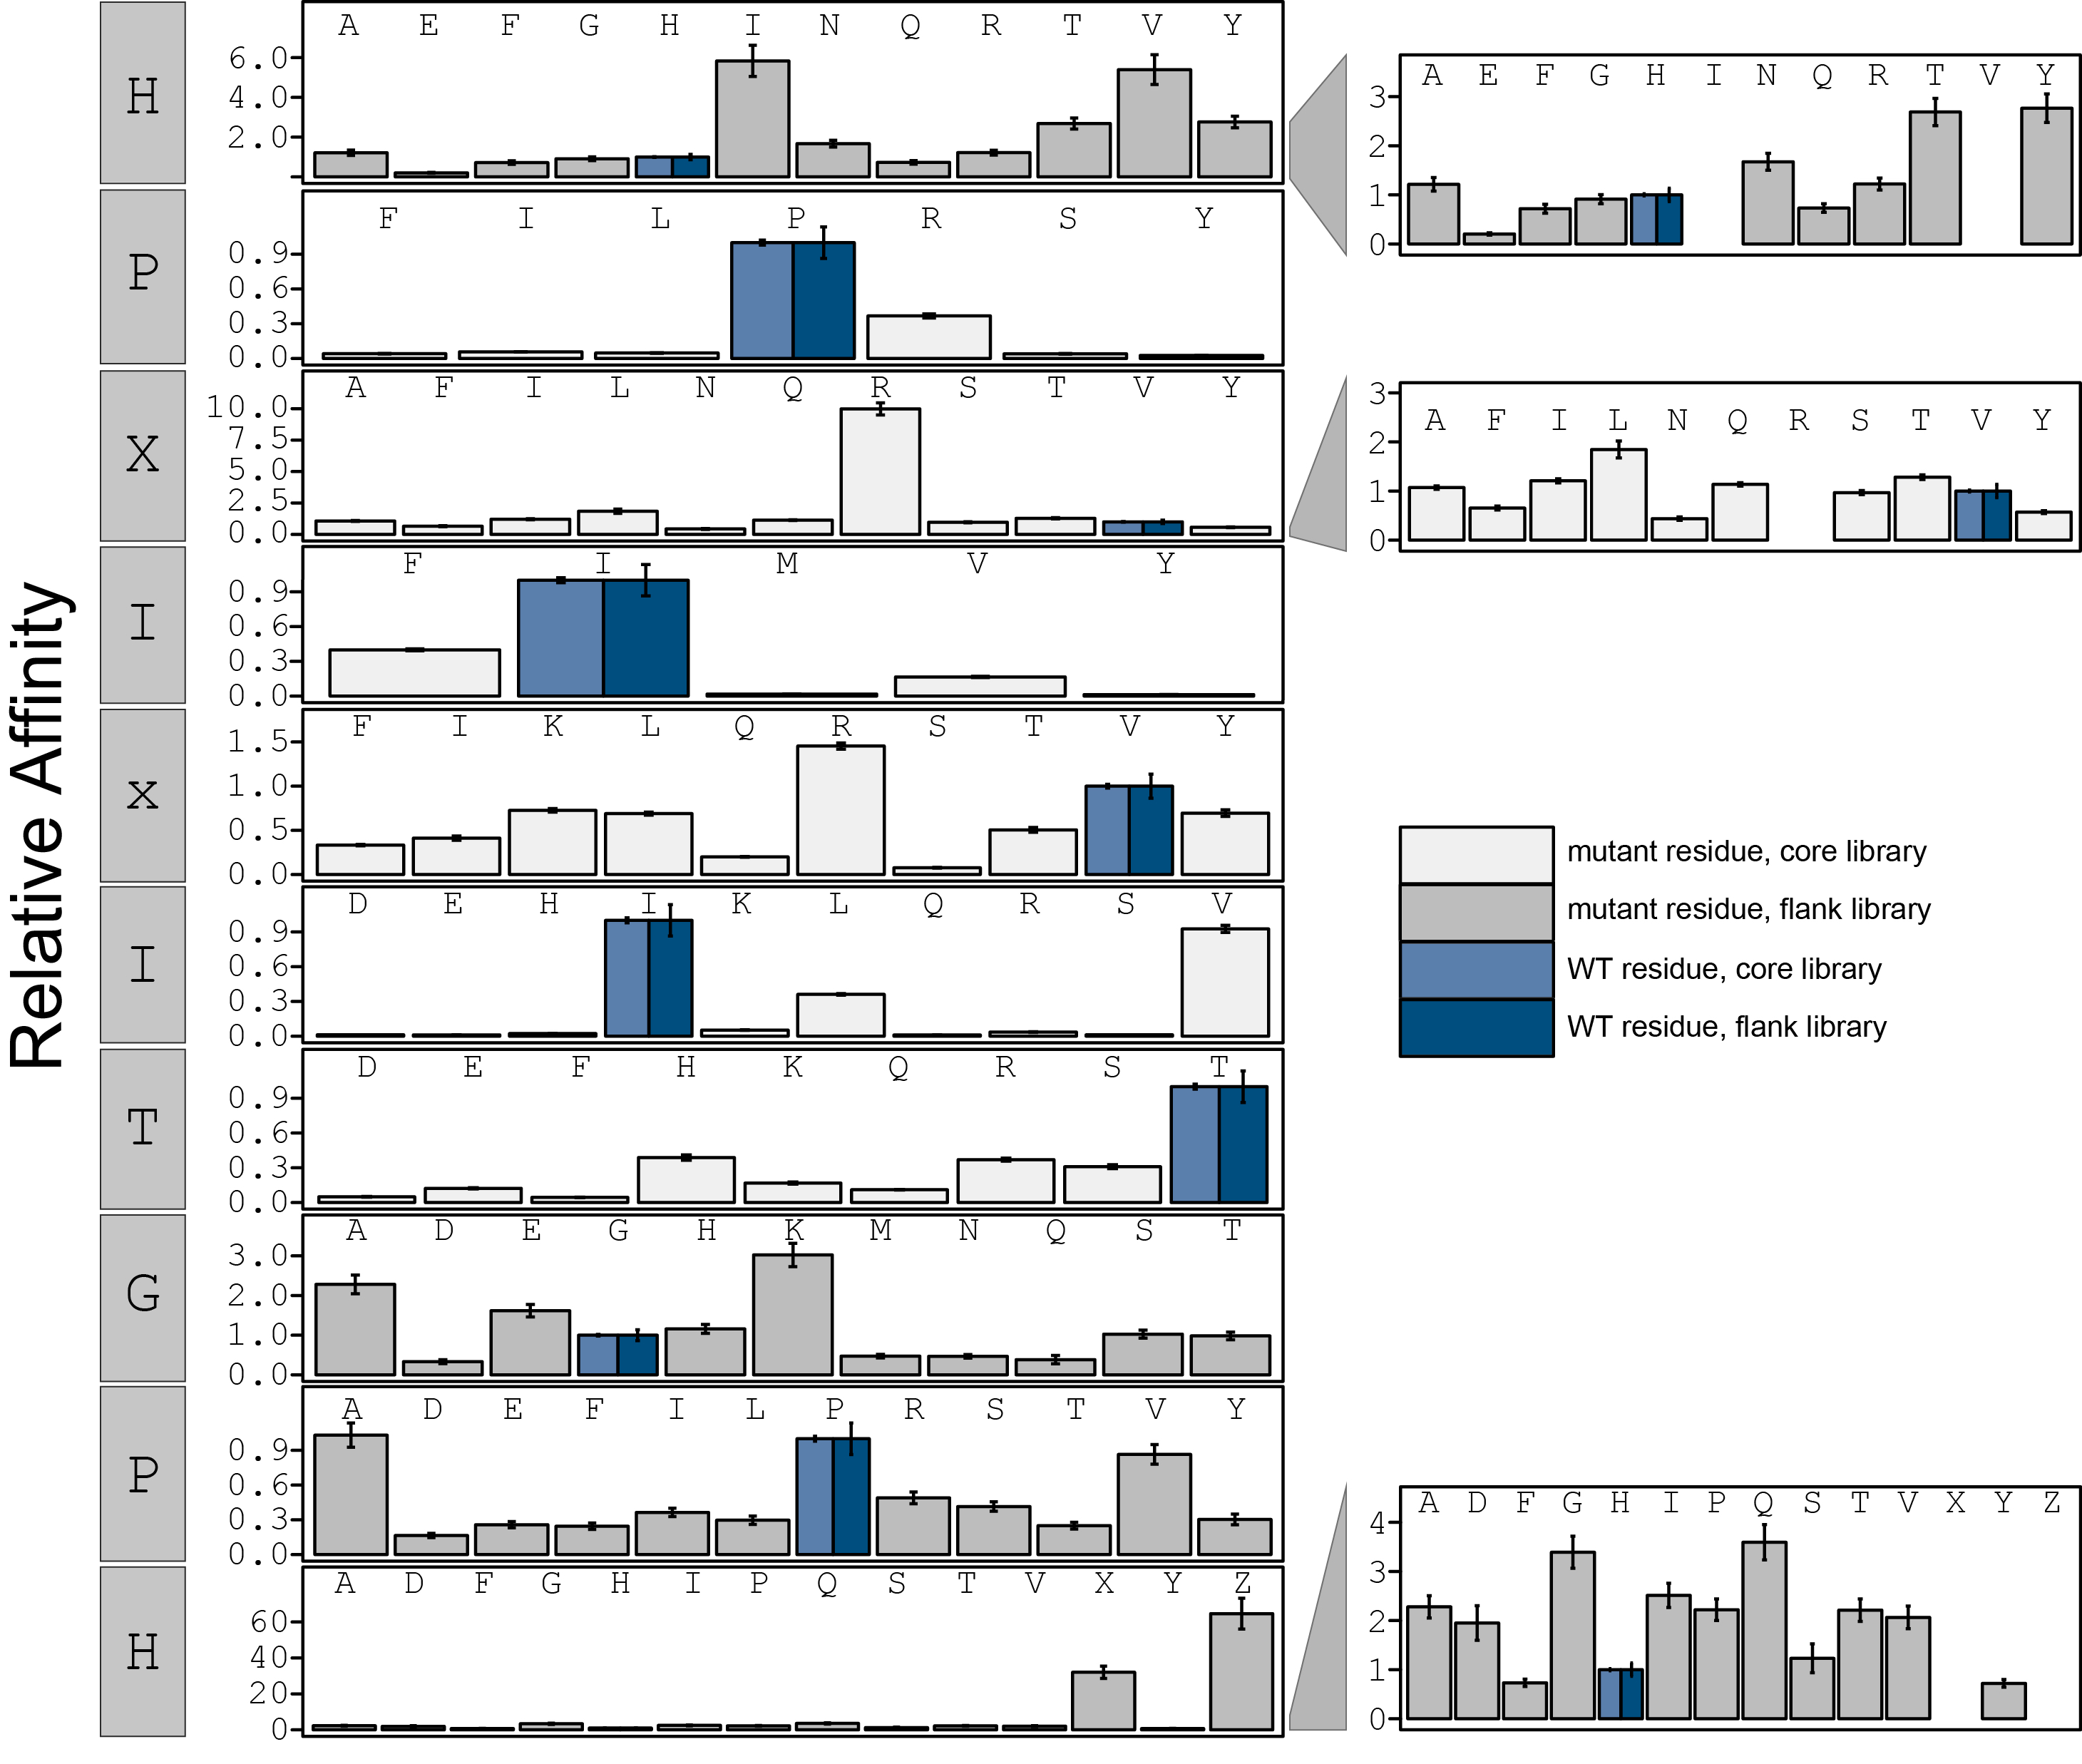

Supplement: supp [file elife-40499-supp-v1.zip › elife_poa_e40499_Figure_3_figure_supplement_13.jpg]

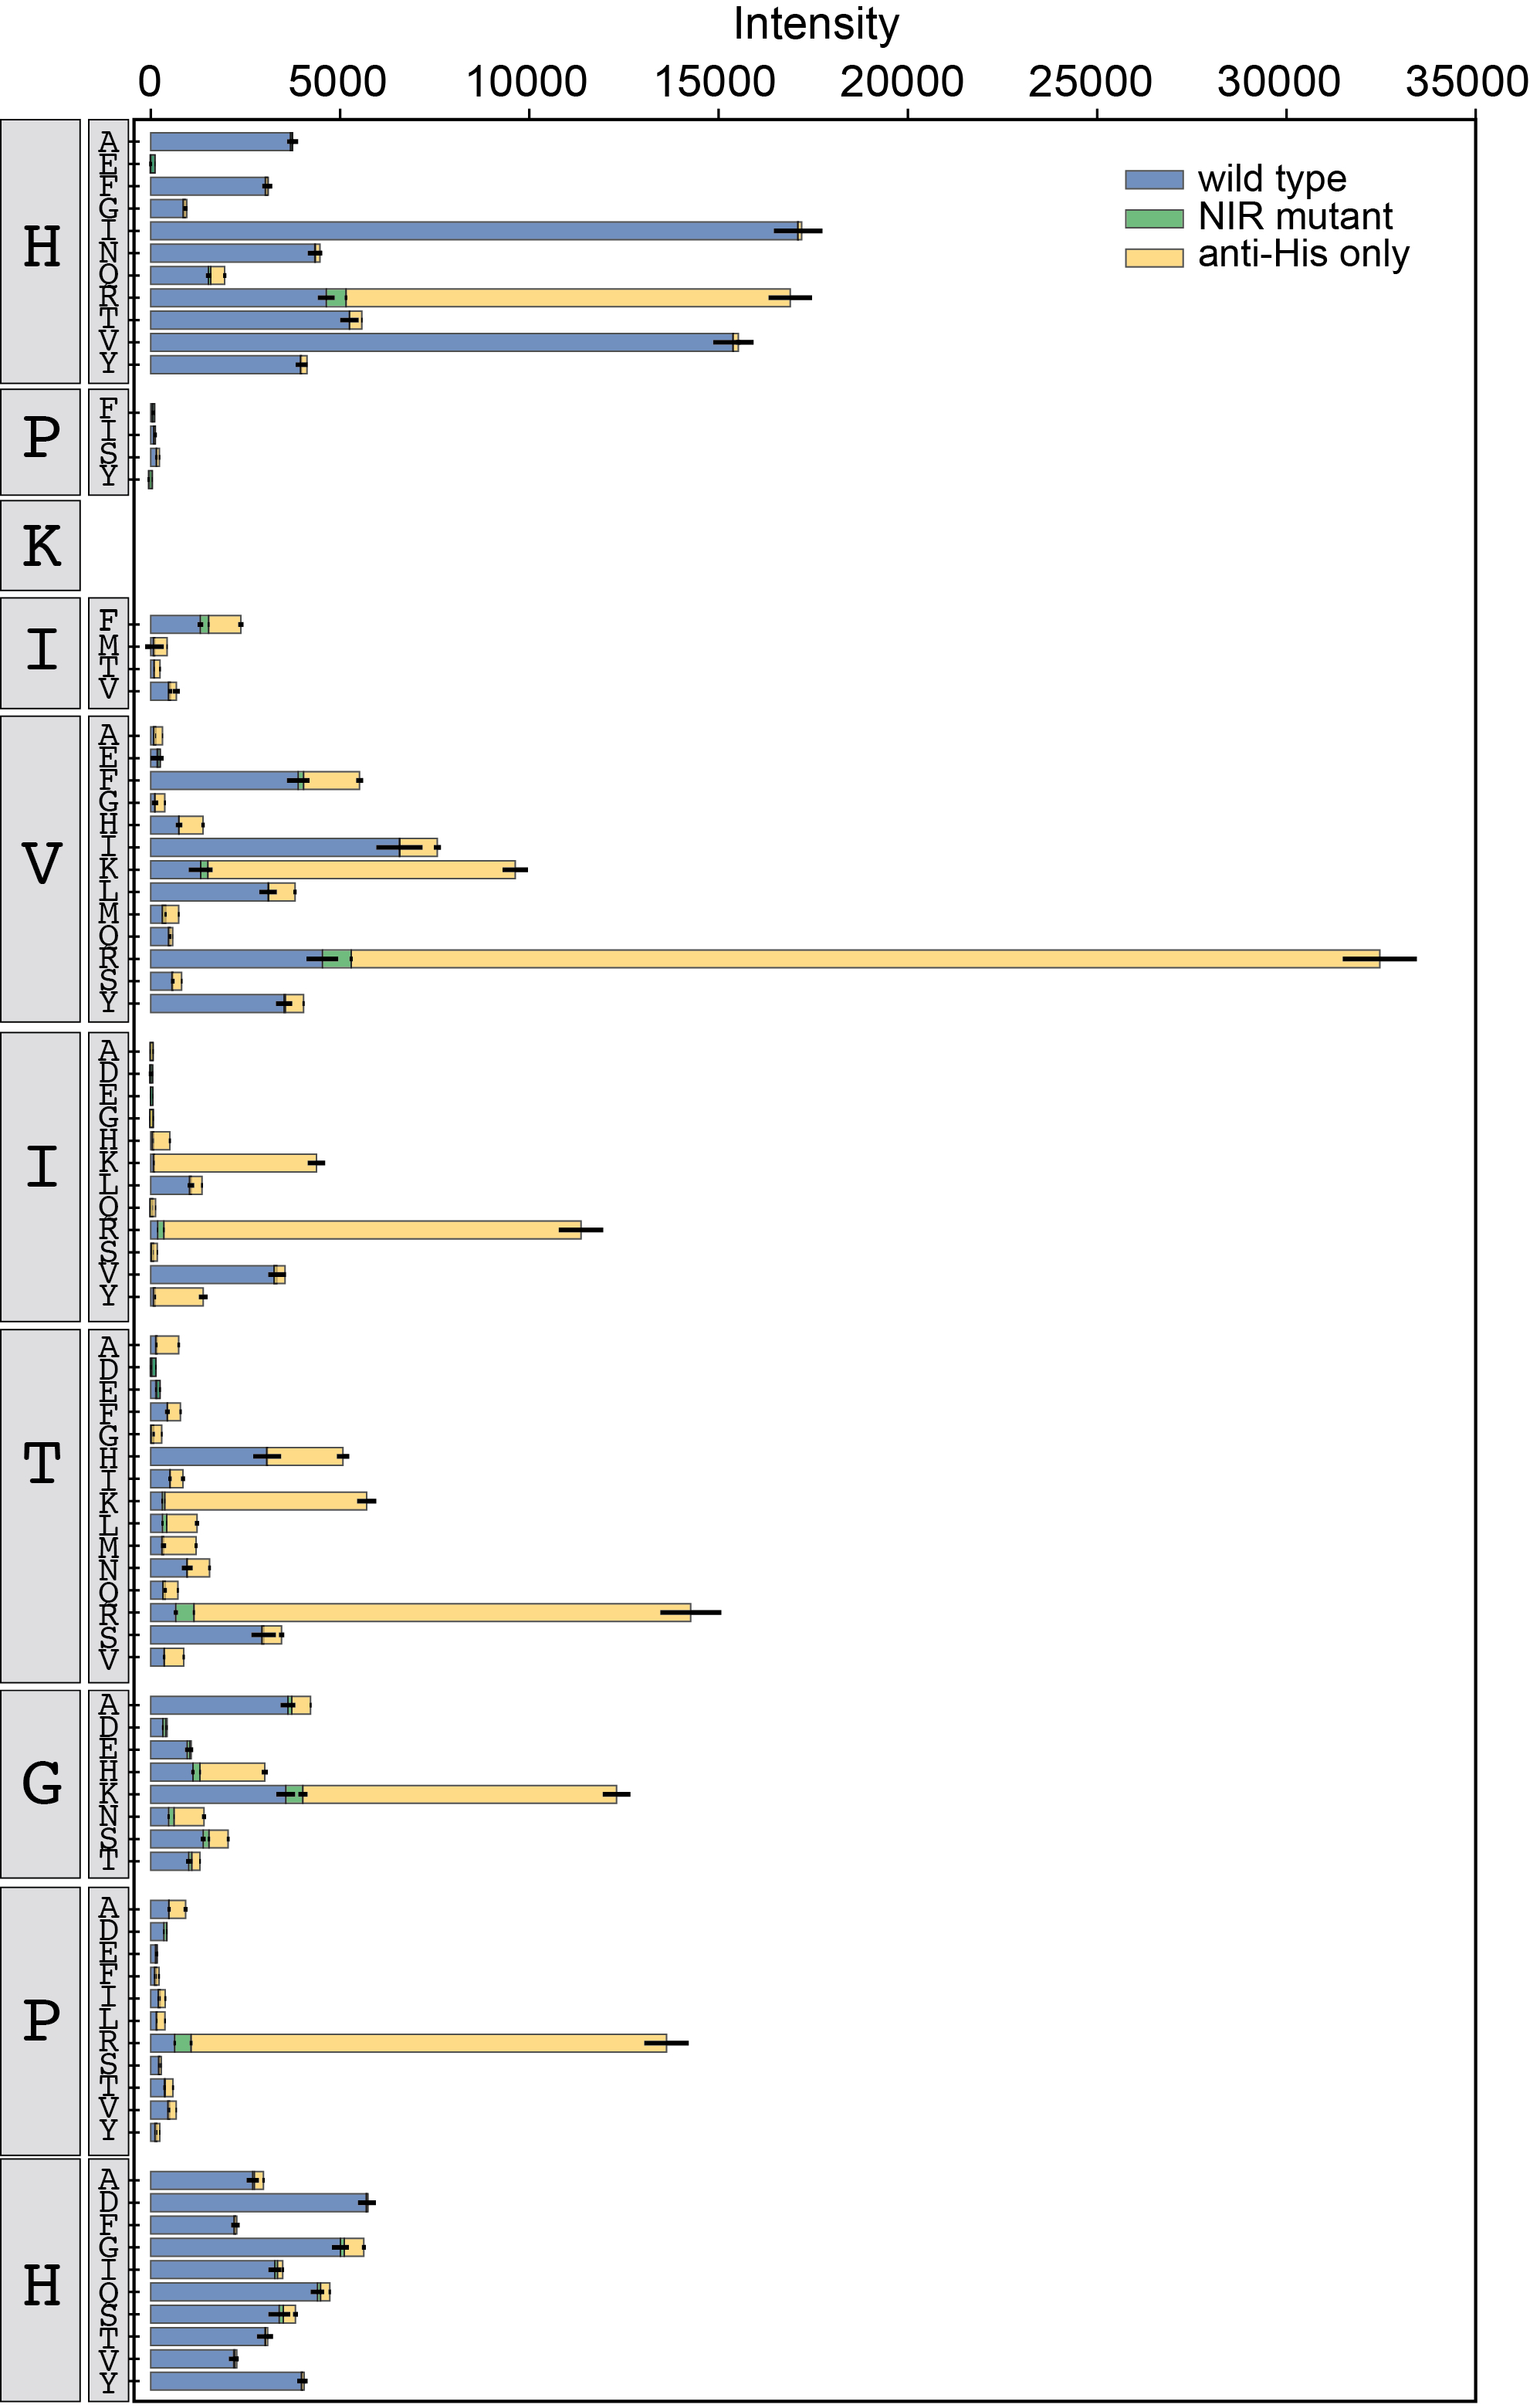

Supplement: supp [file elife-40499-supp-v1.zip › elife_poa_e40499_Figure_3_figure_supplement_10.jpg]

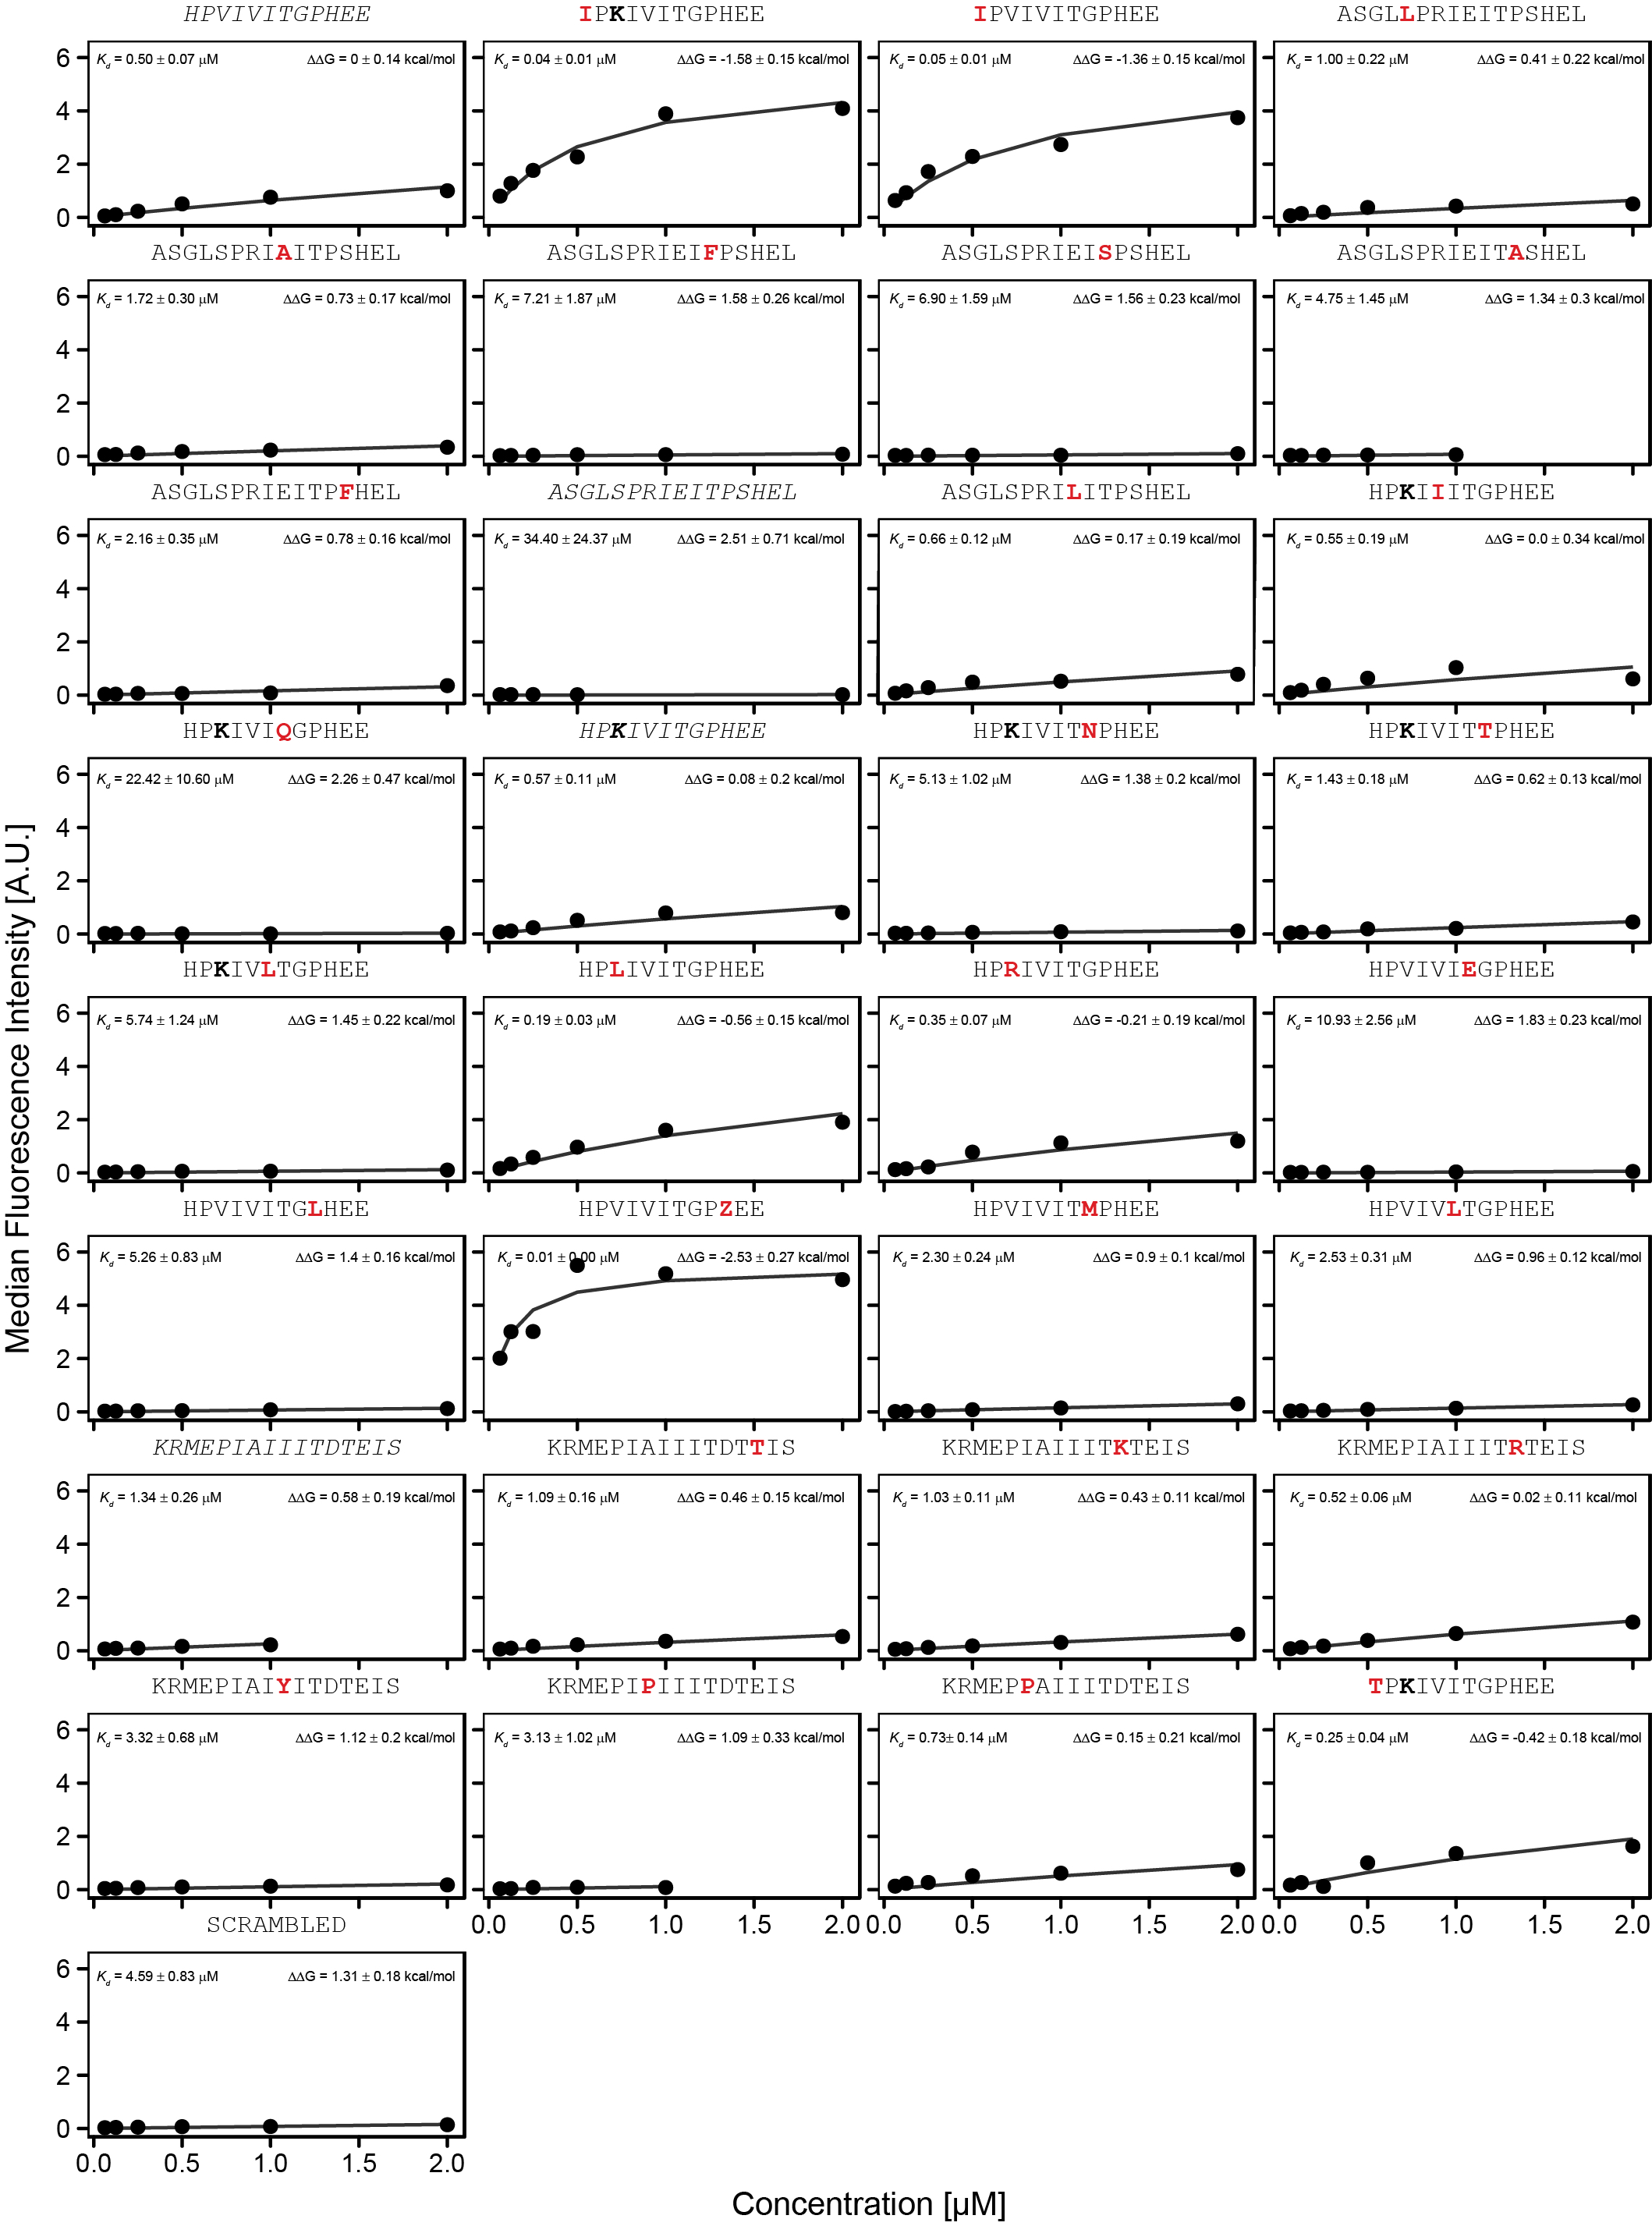

Supplement: supp [file elife-40499-supp-v1.zip › elife_poa_e40499_Figure_5_figure_supplement_1.jpg]

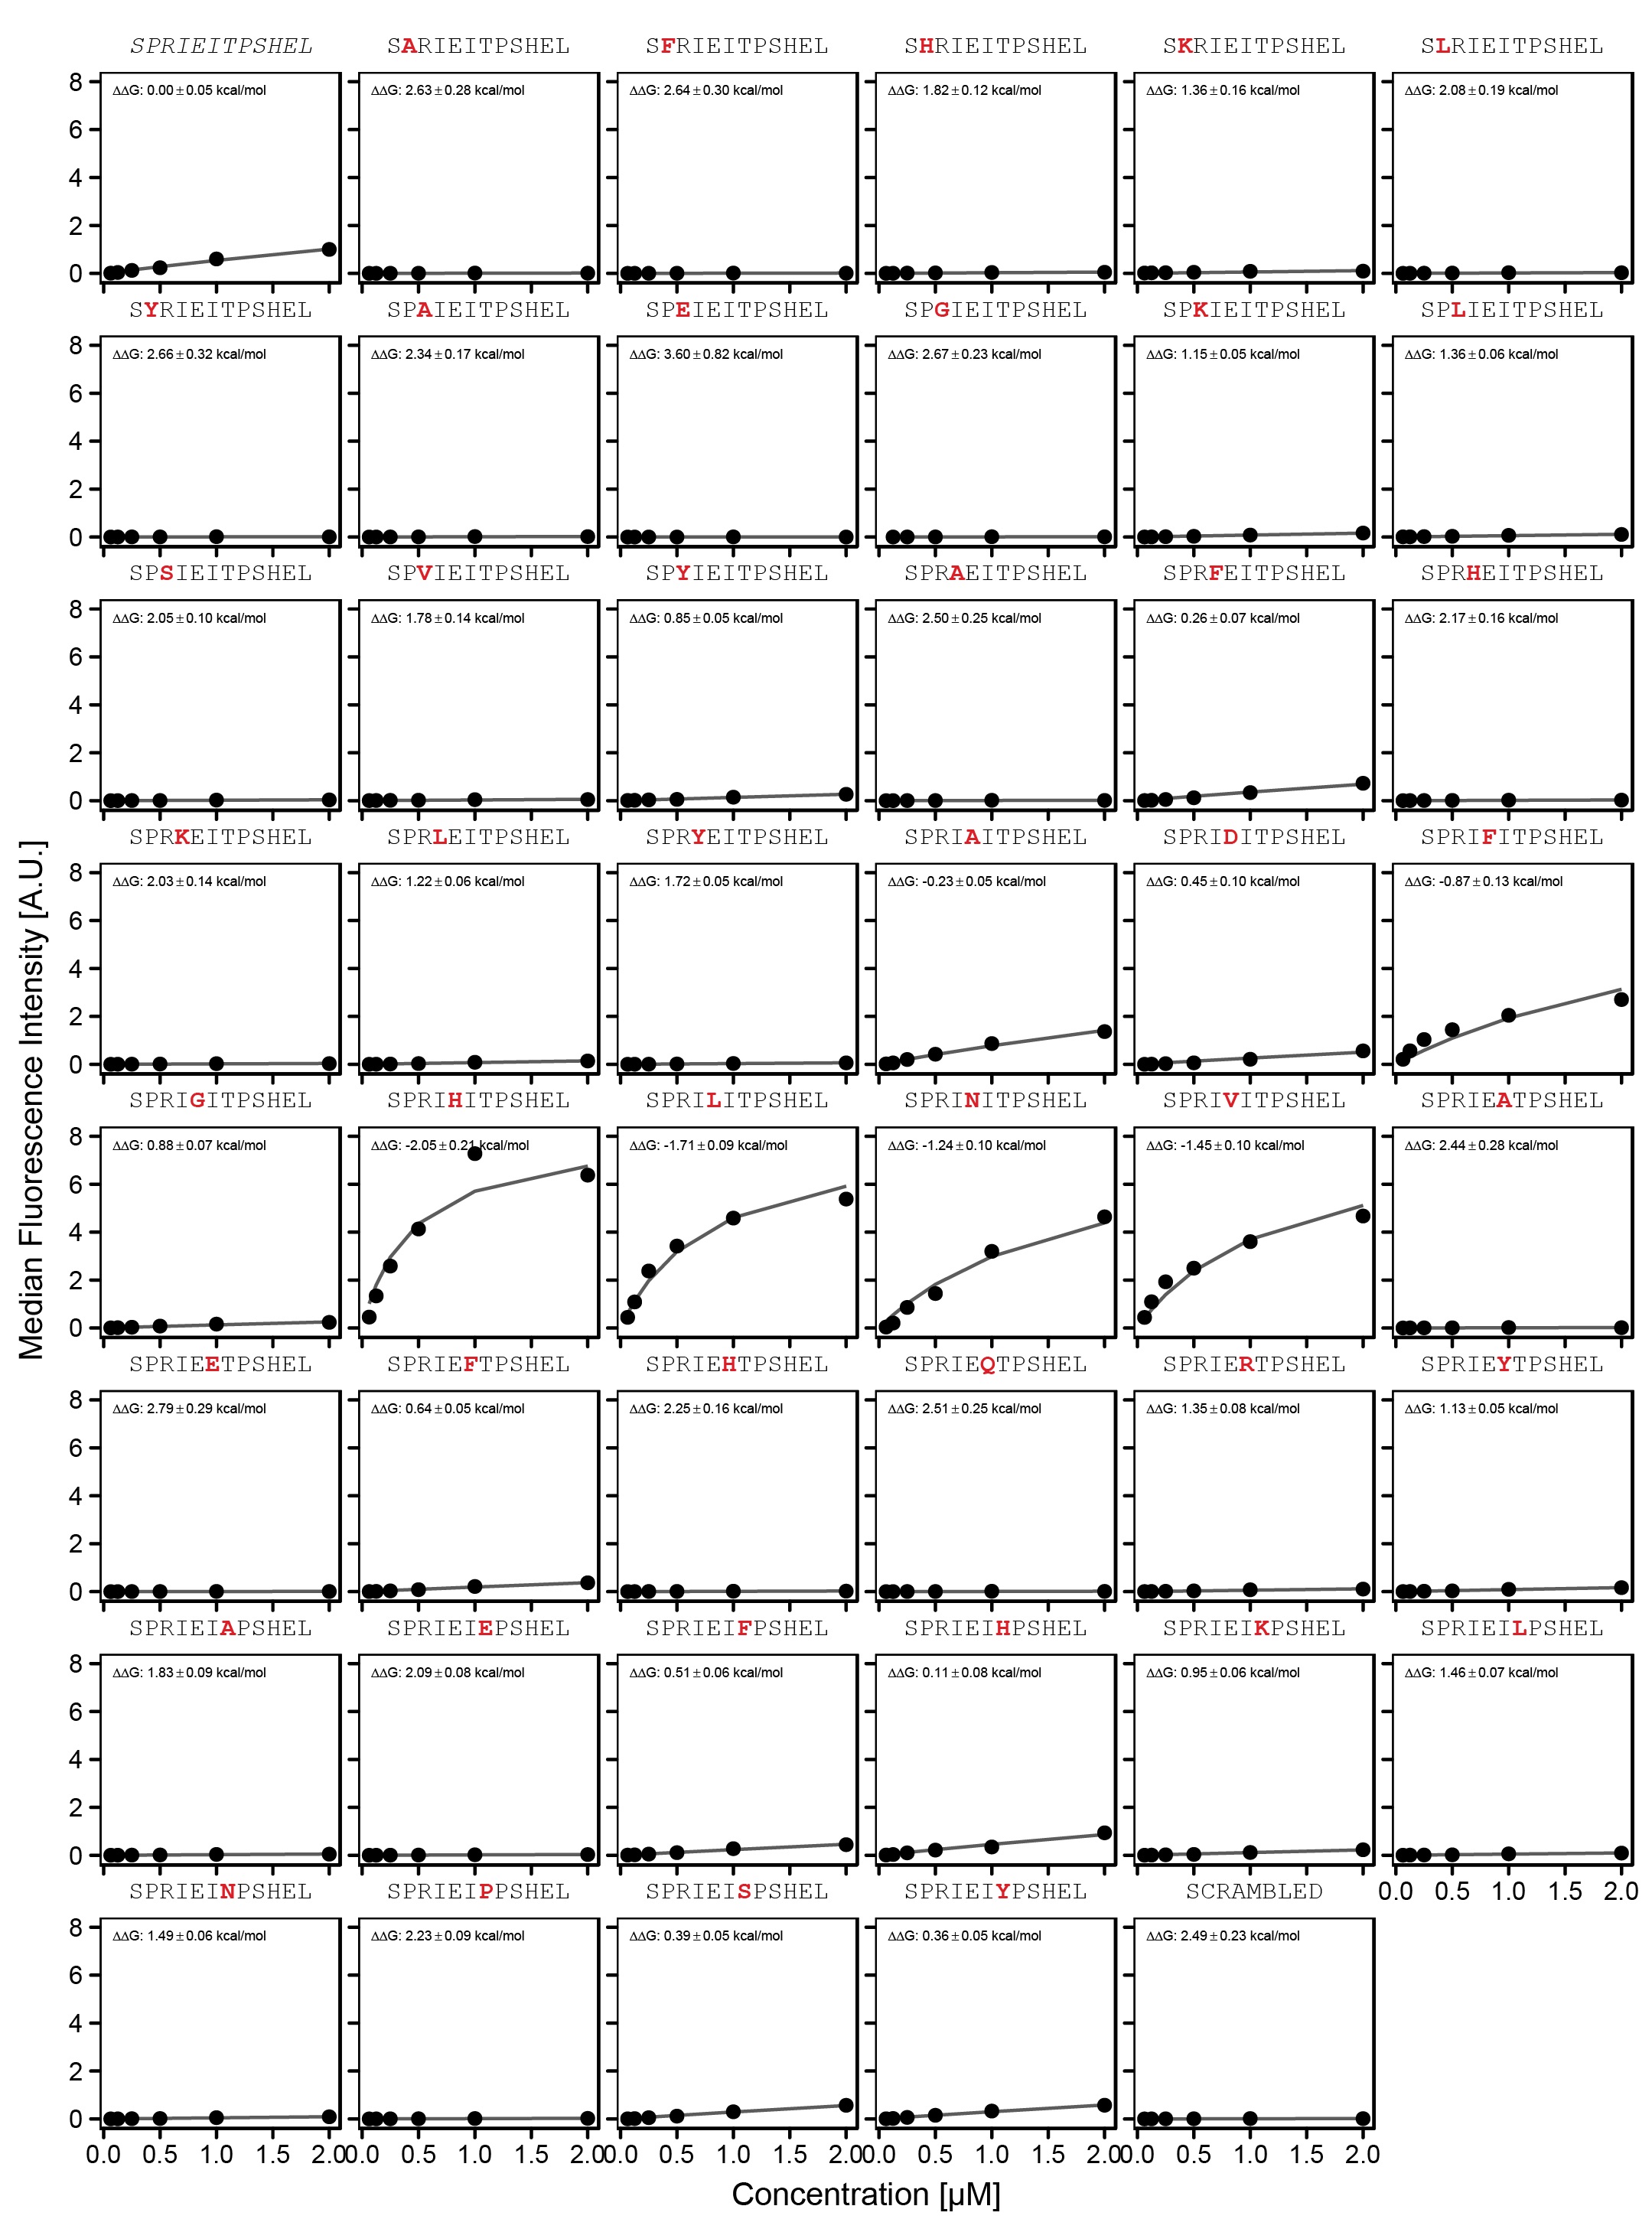

Supplement: supp [file elife-40499-supp-v1.zip › elife_poa_e40499_Figure_3_figure_supplement_5.jpg]

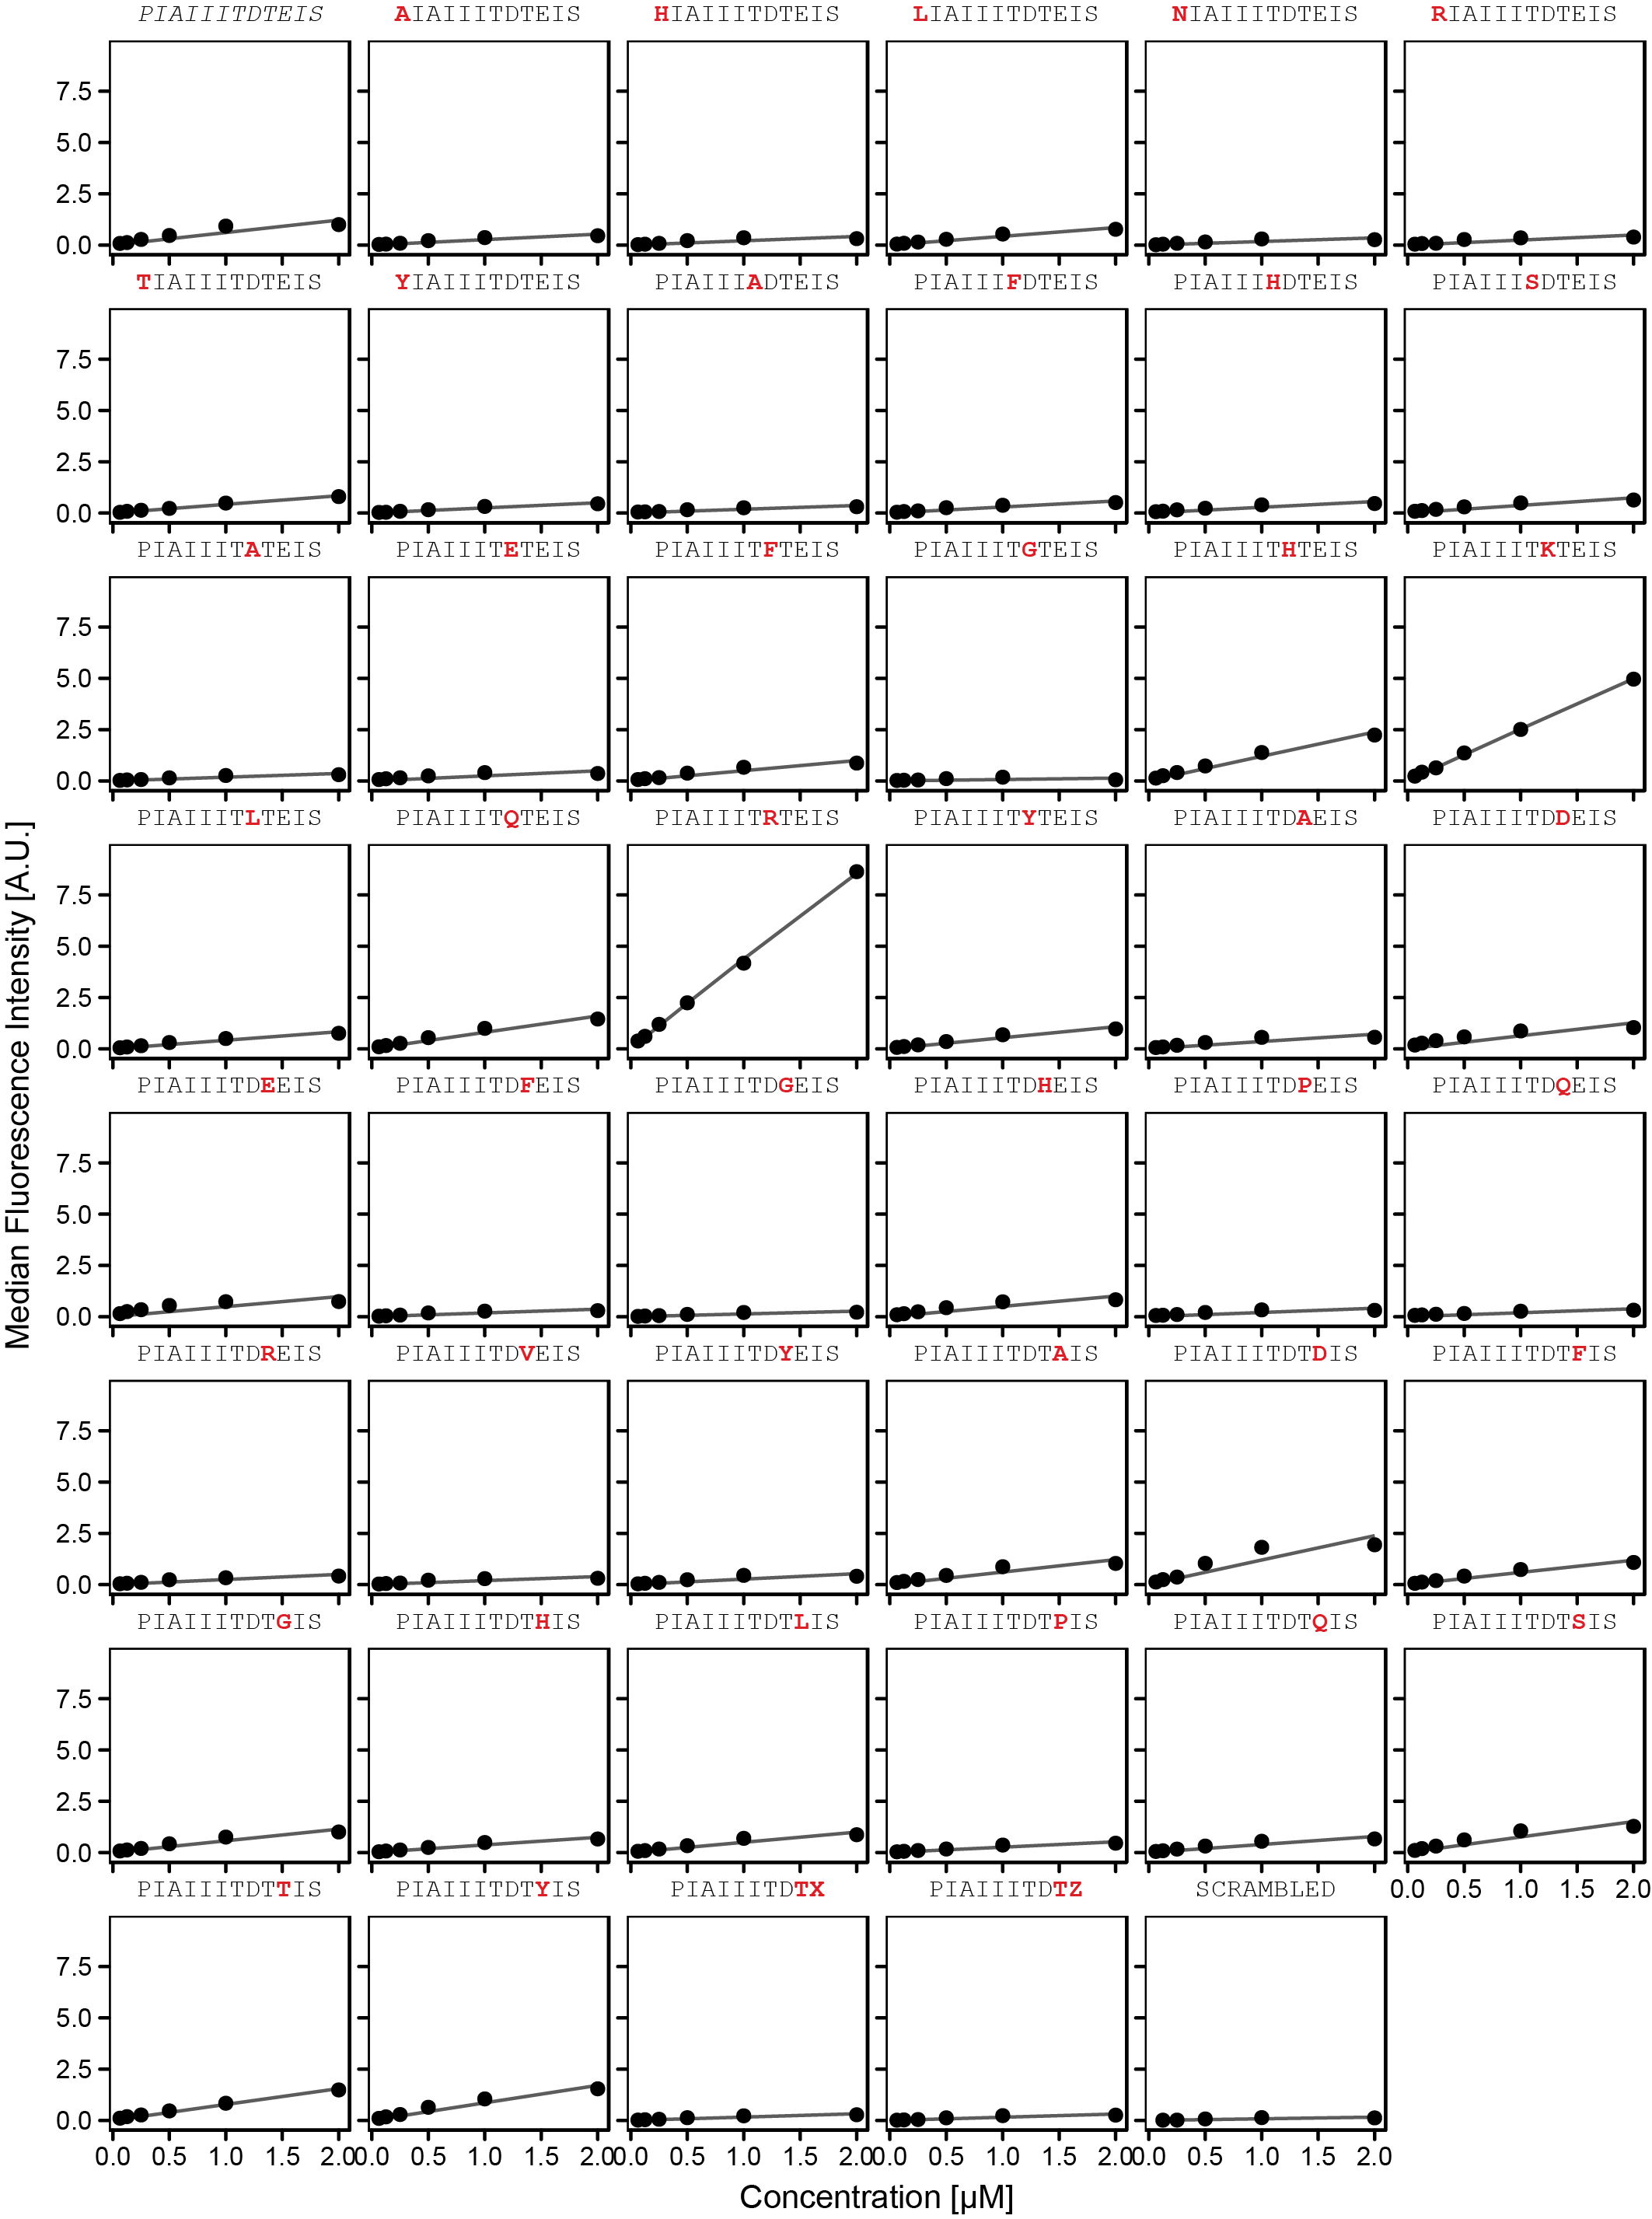

Supplement: supp [file elife-40499-supp-v1.zip › elife_poa_e40499_Figure_3_figure_supplement_8.jpg]

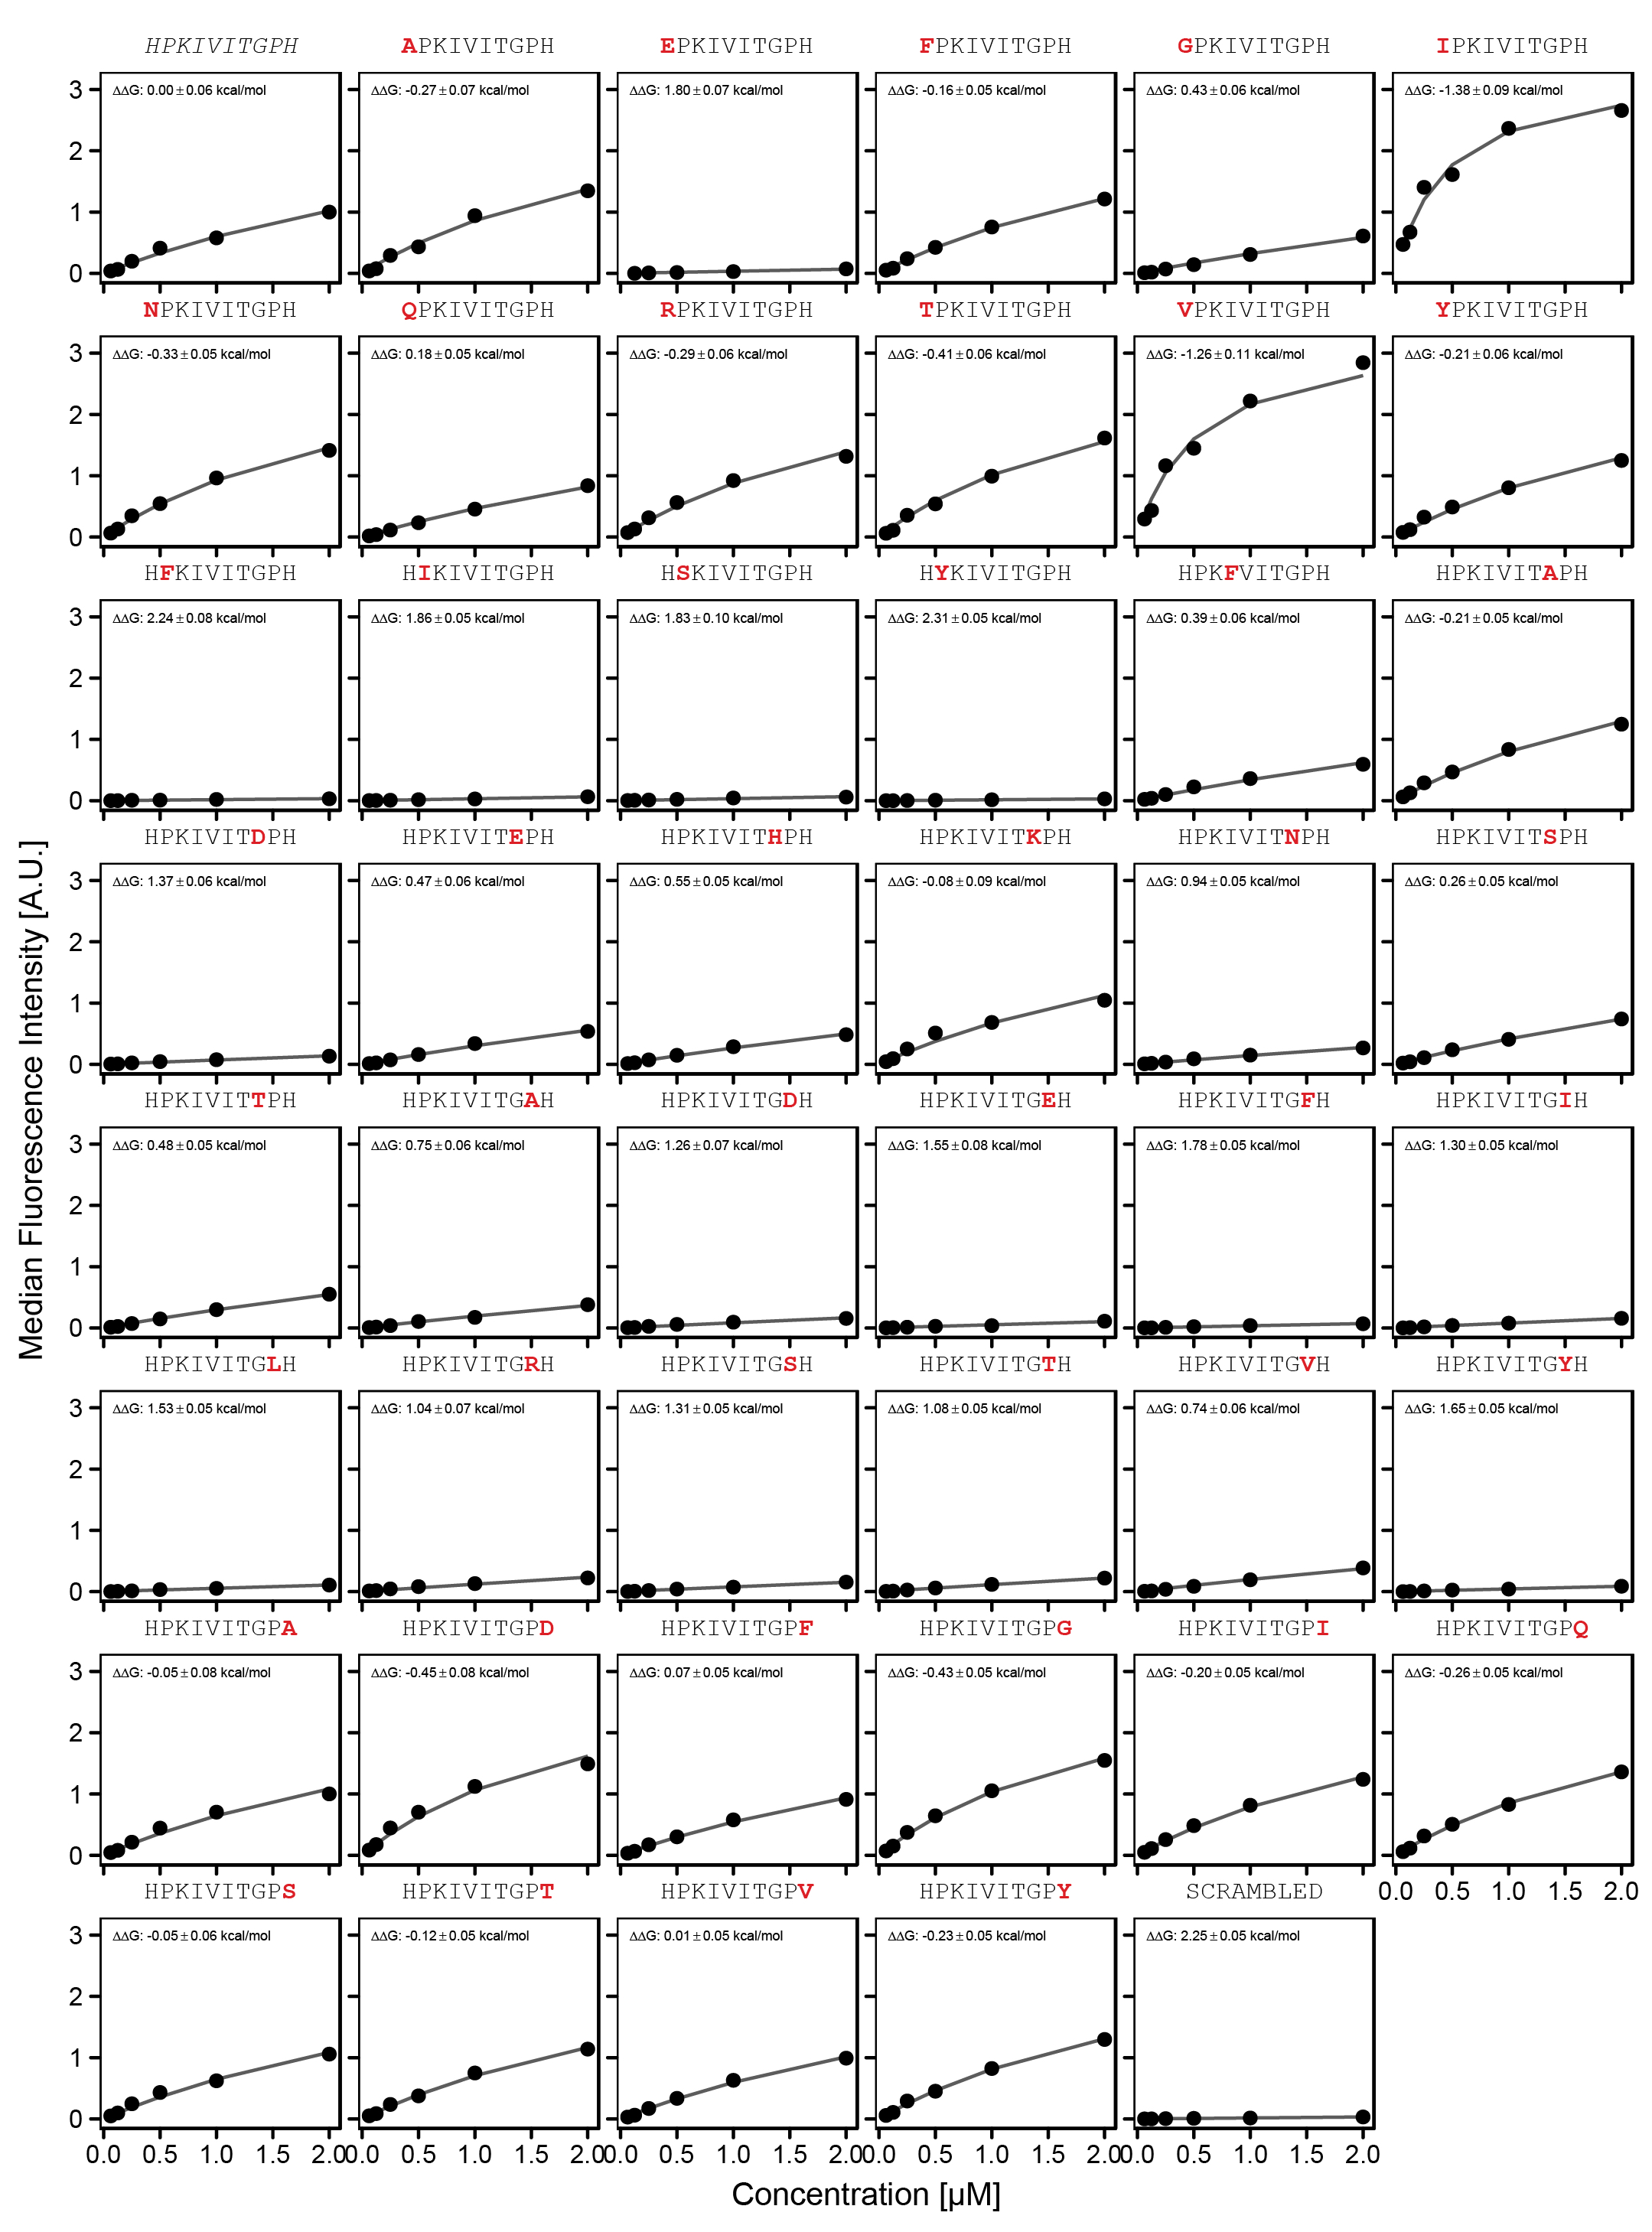

Supplement: supp [file elife-40499-supp-v1.zip › elife_poa_e40499_Figure_3_figure_supplement_4.jpg]

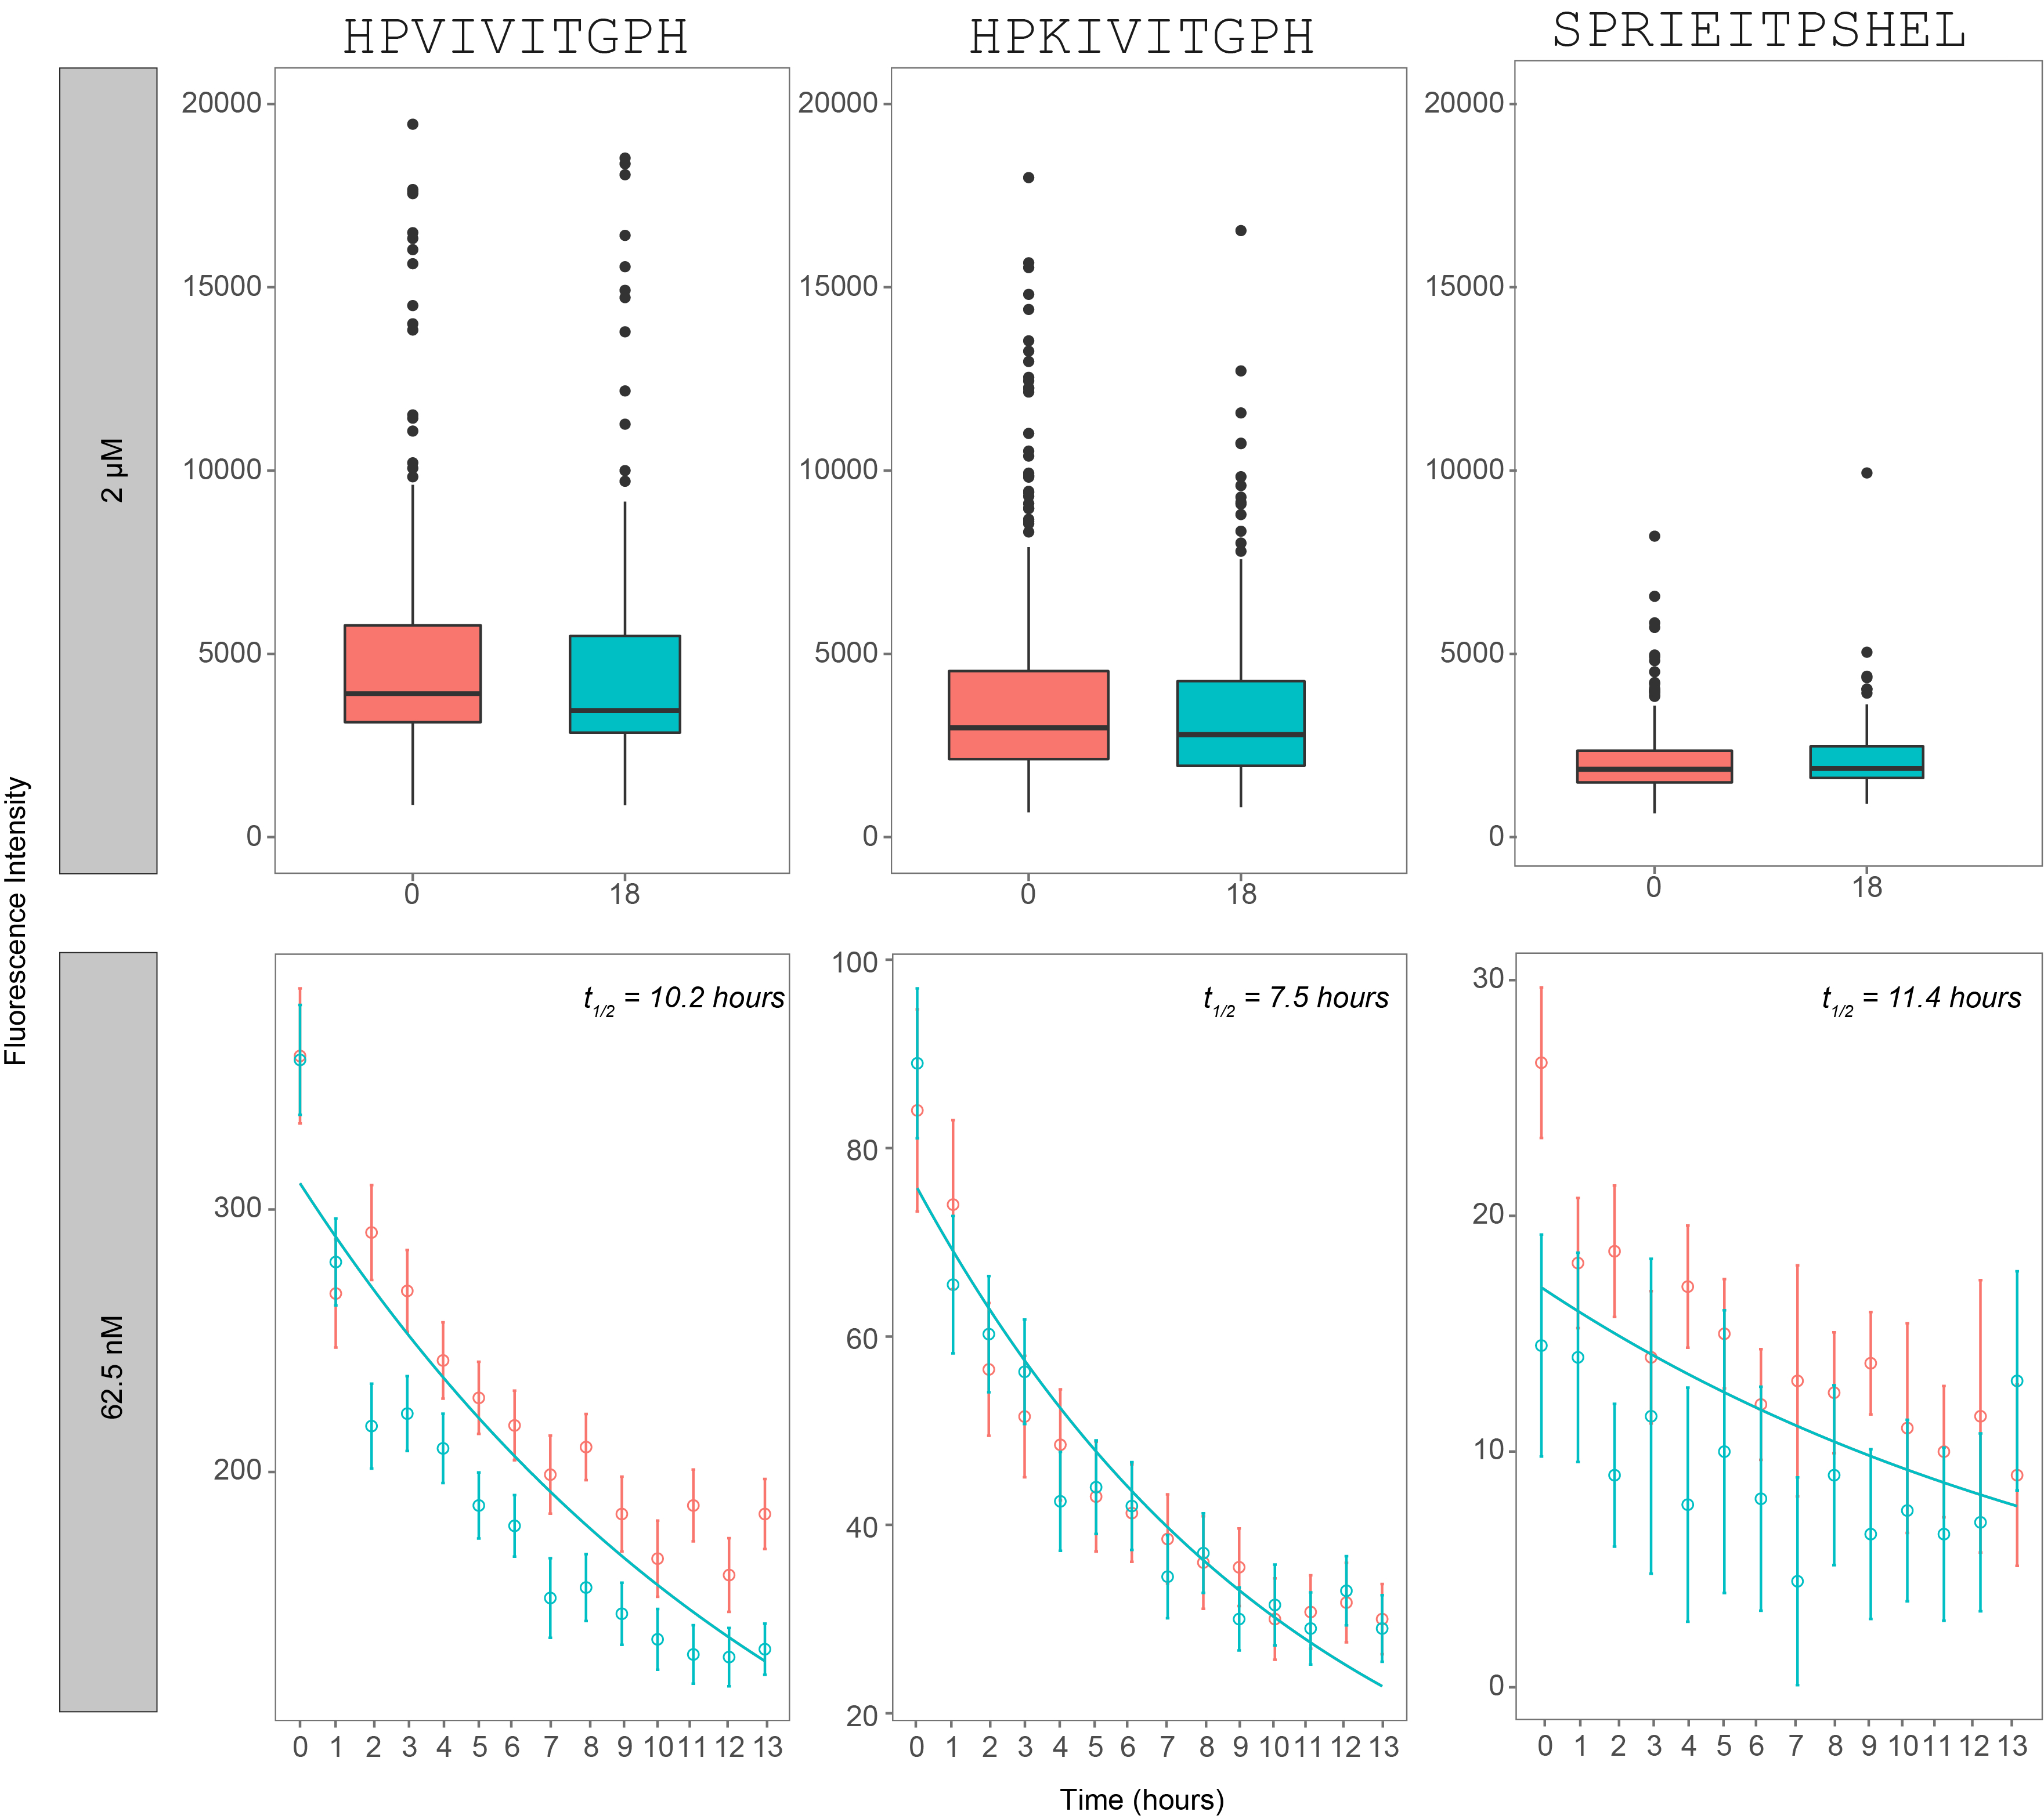

Supplement: supp [file elife-40499-supp-v1.zip › elife_poa_e40499_Figure_2_figure_supplement_2.jpg]

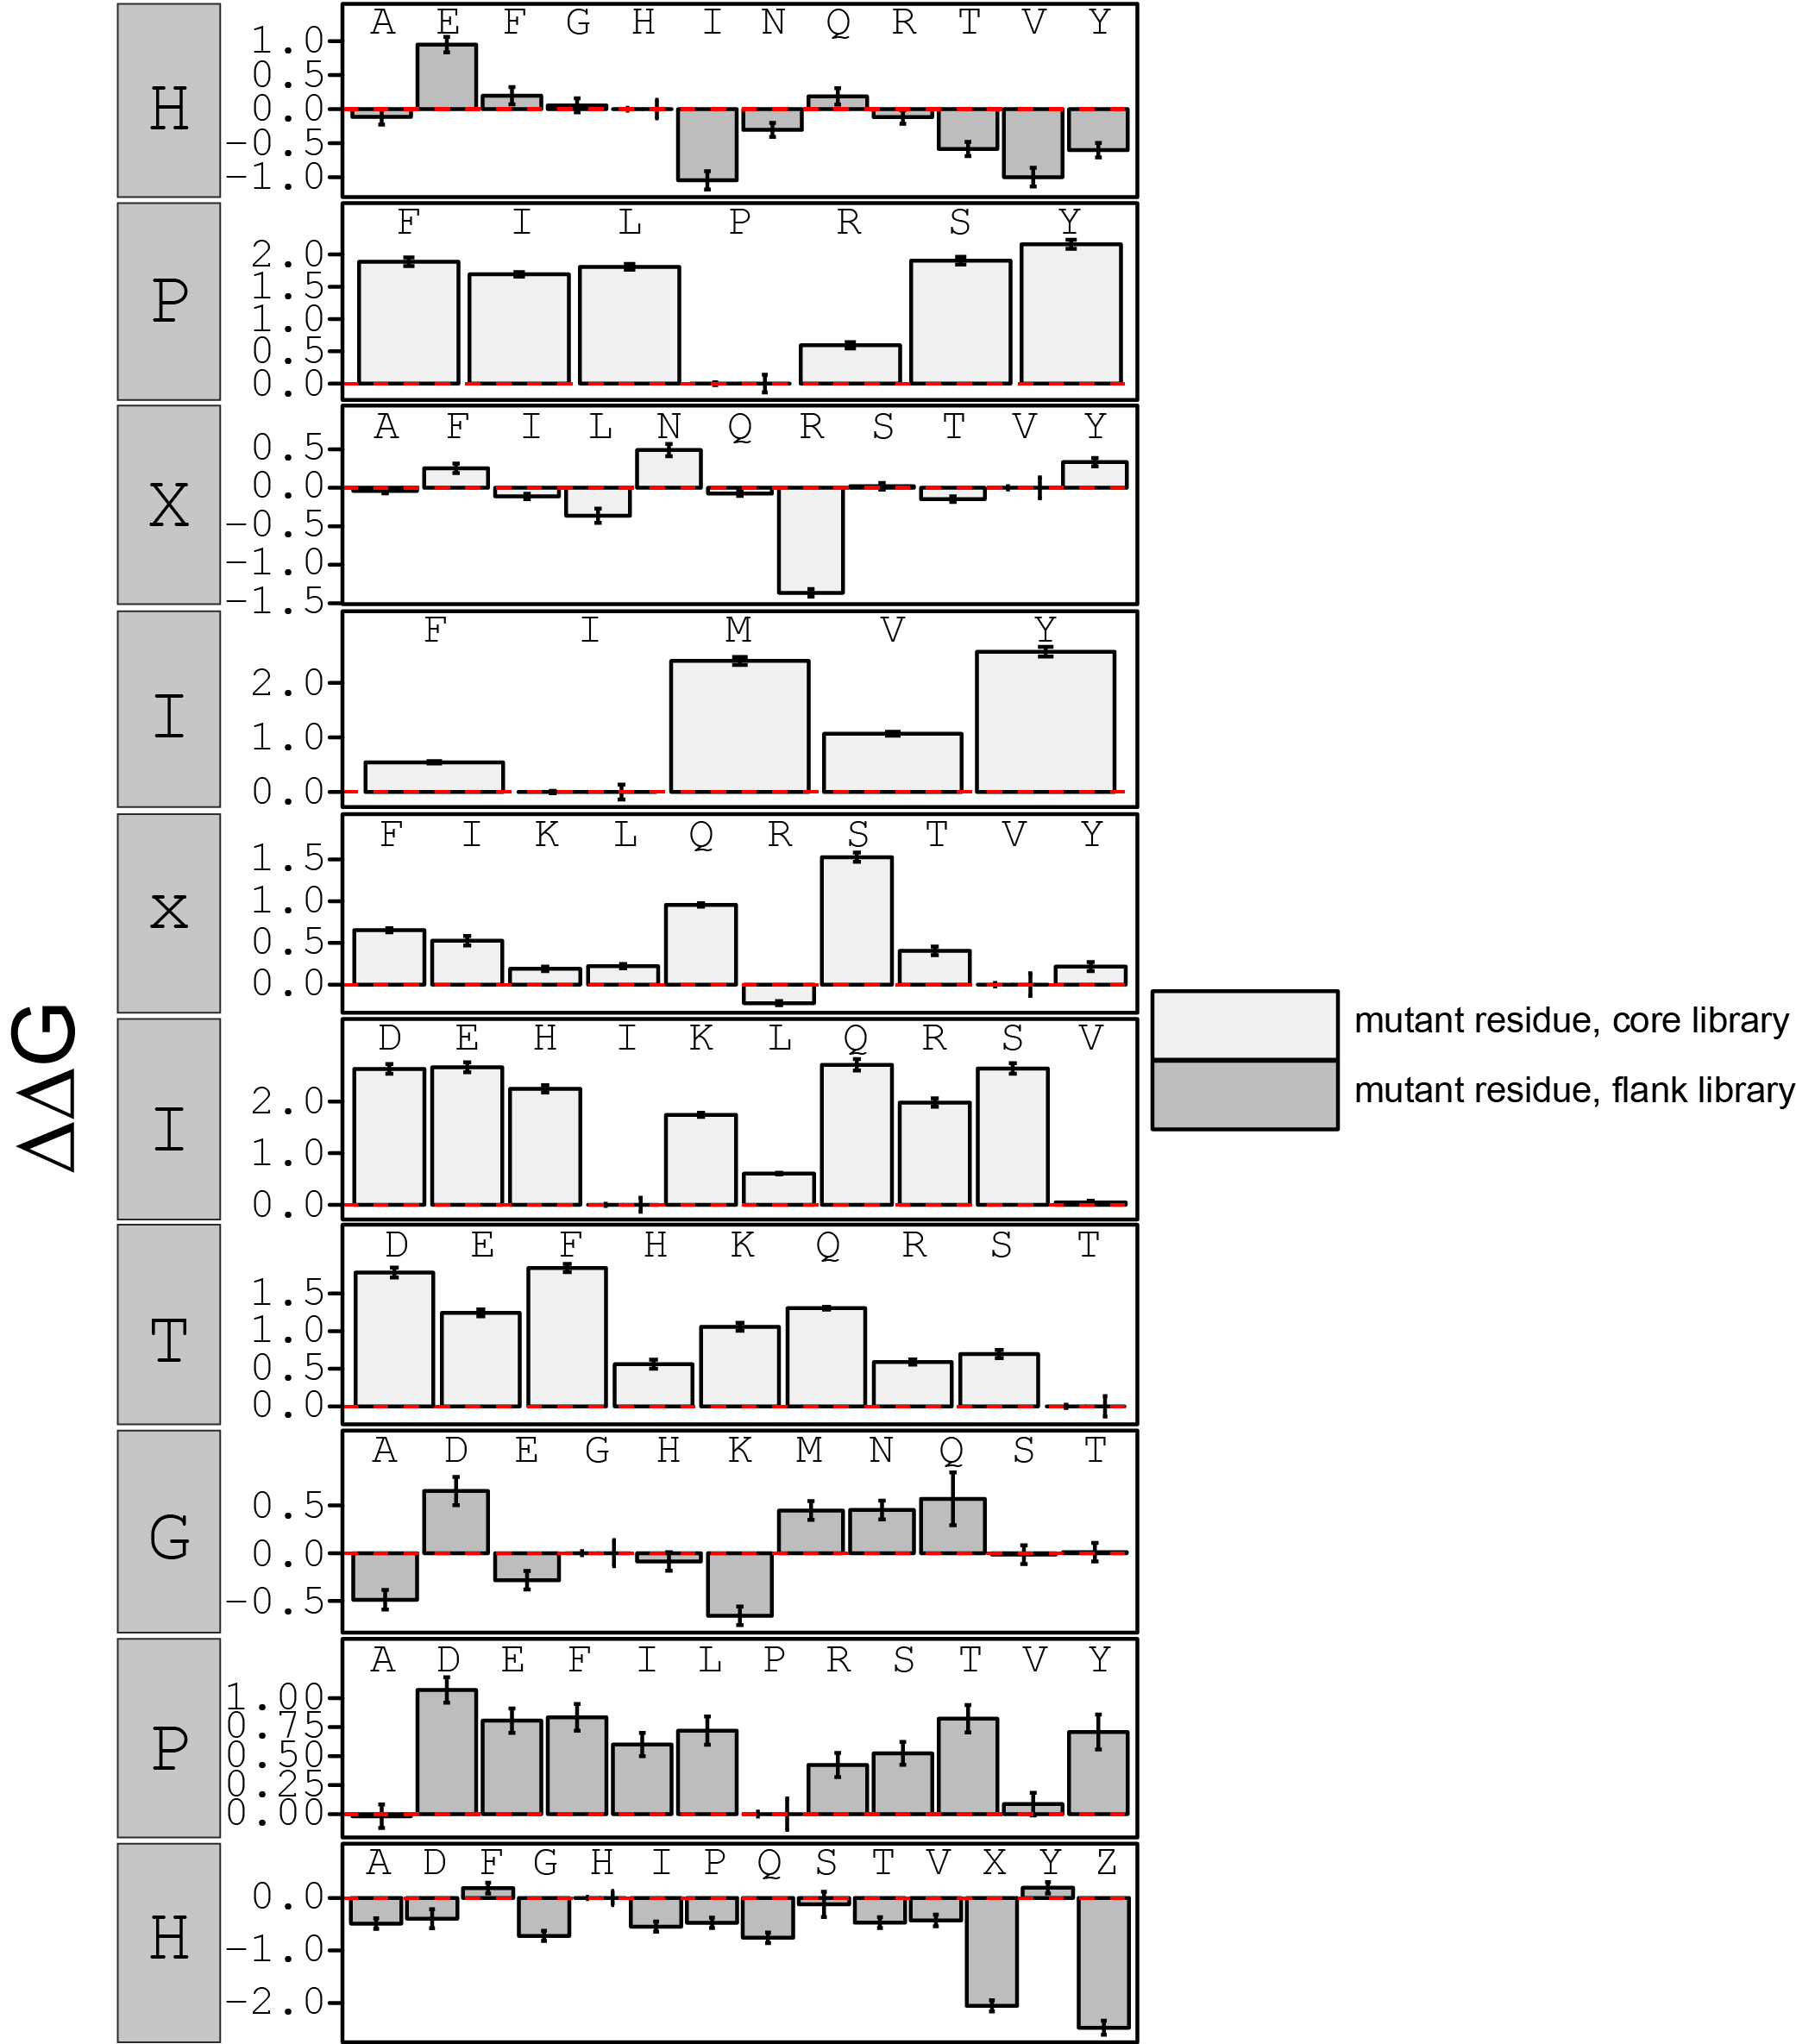

Supplement: supp [file elife-40499-supp-v1.zip › elife_poa_e40499_Figure_3_figure_supplement_14.jpg]

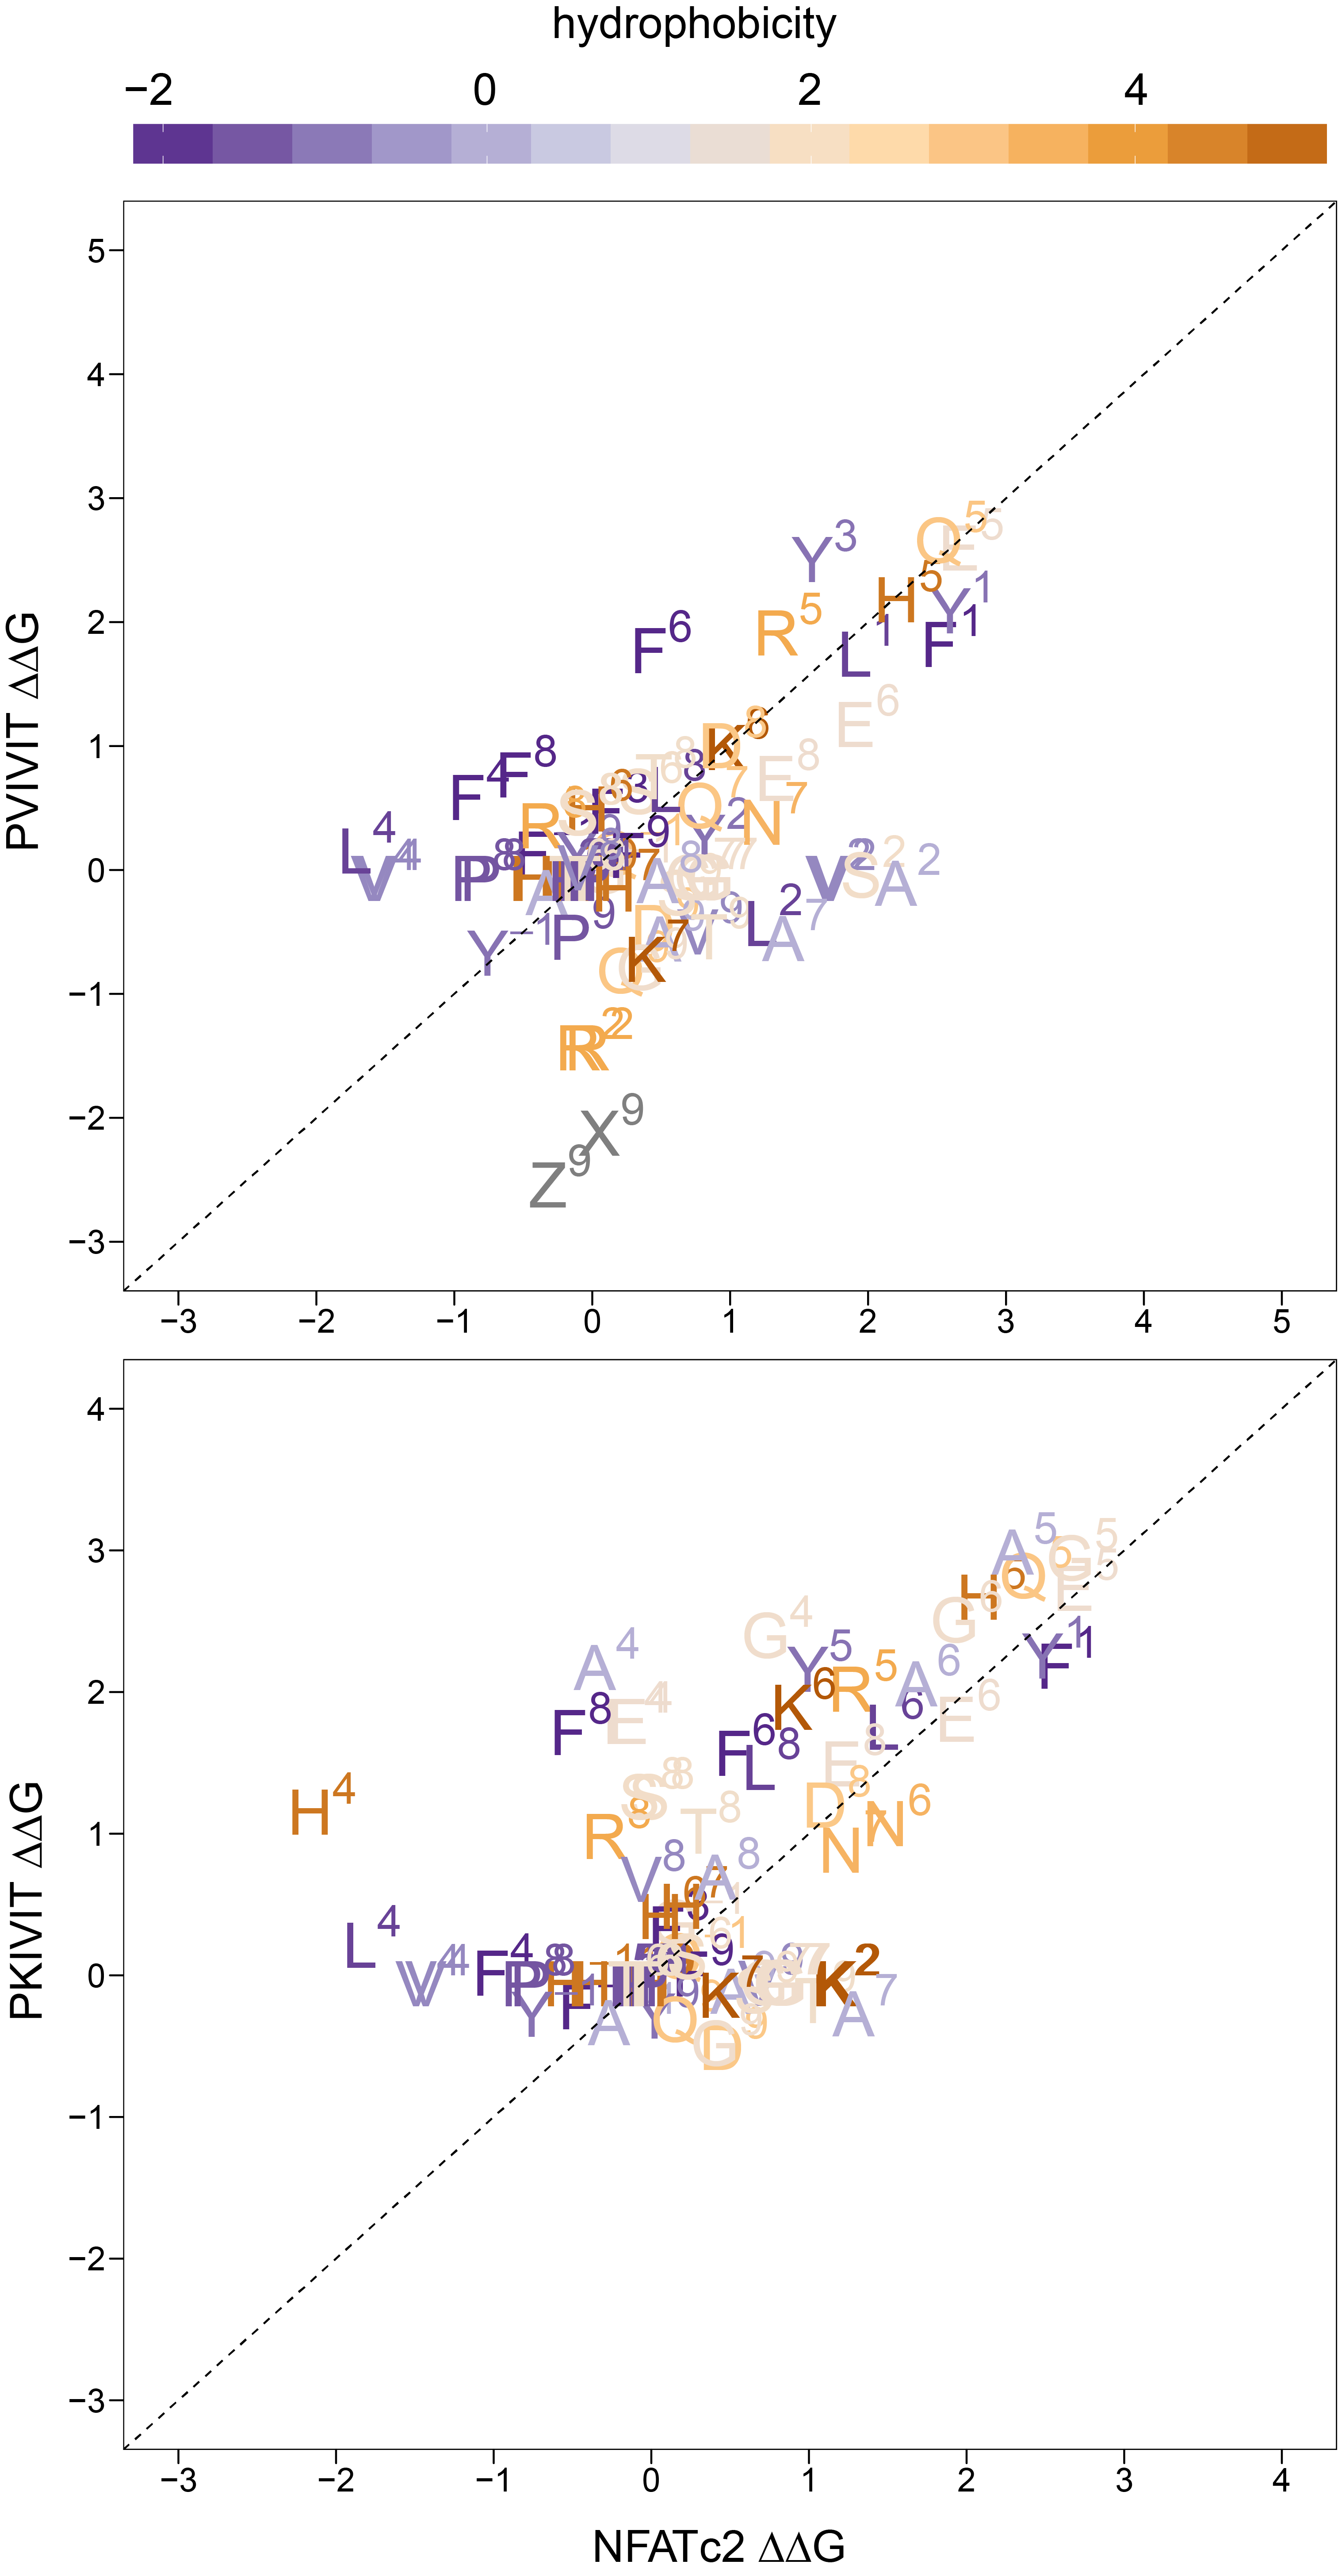

Supplement: supp [file elife-40499-supp-v1.zip › elife_poa_e40499_Figure_3_figure_supplement_23.jpg]

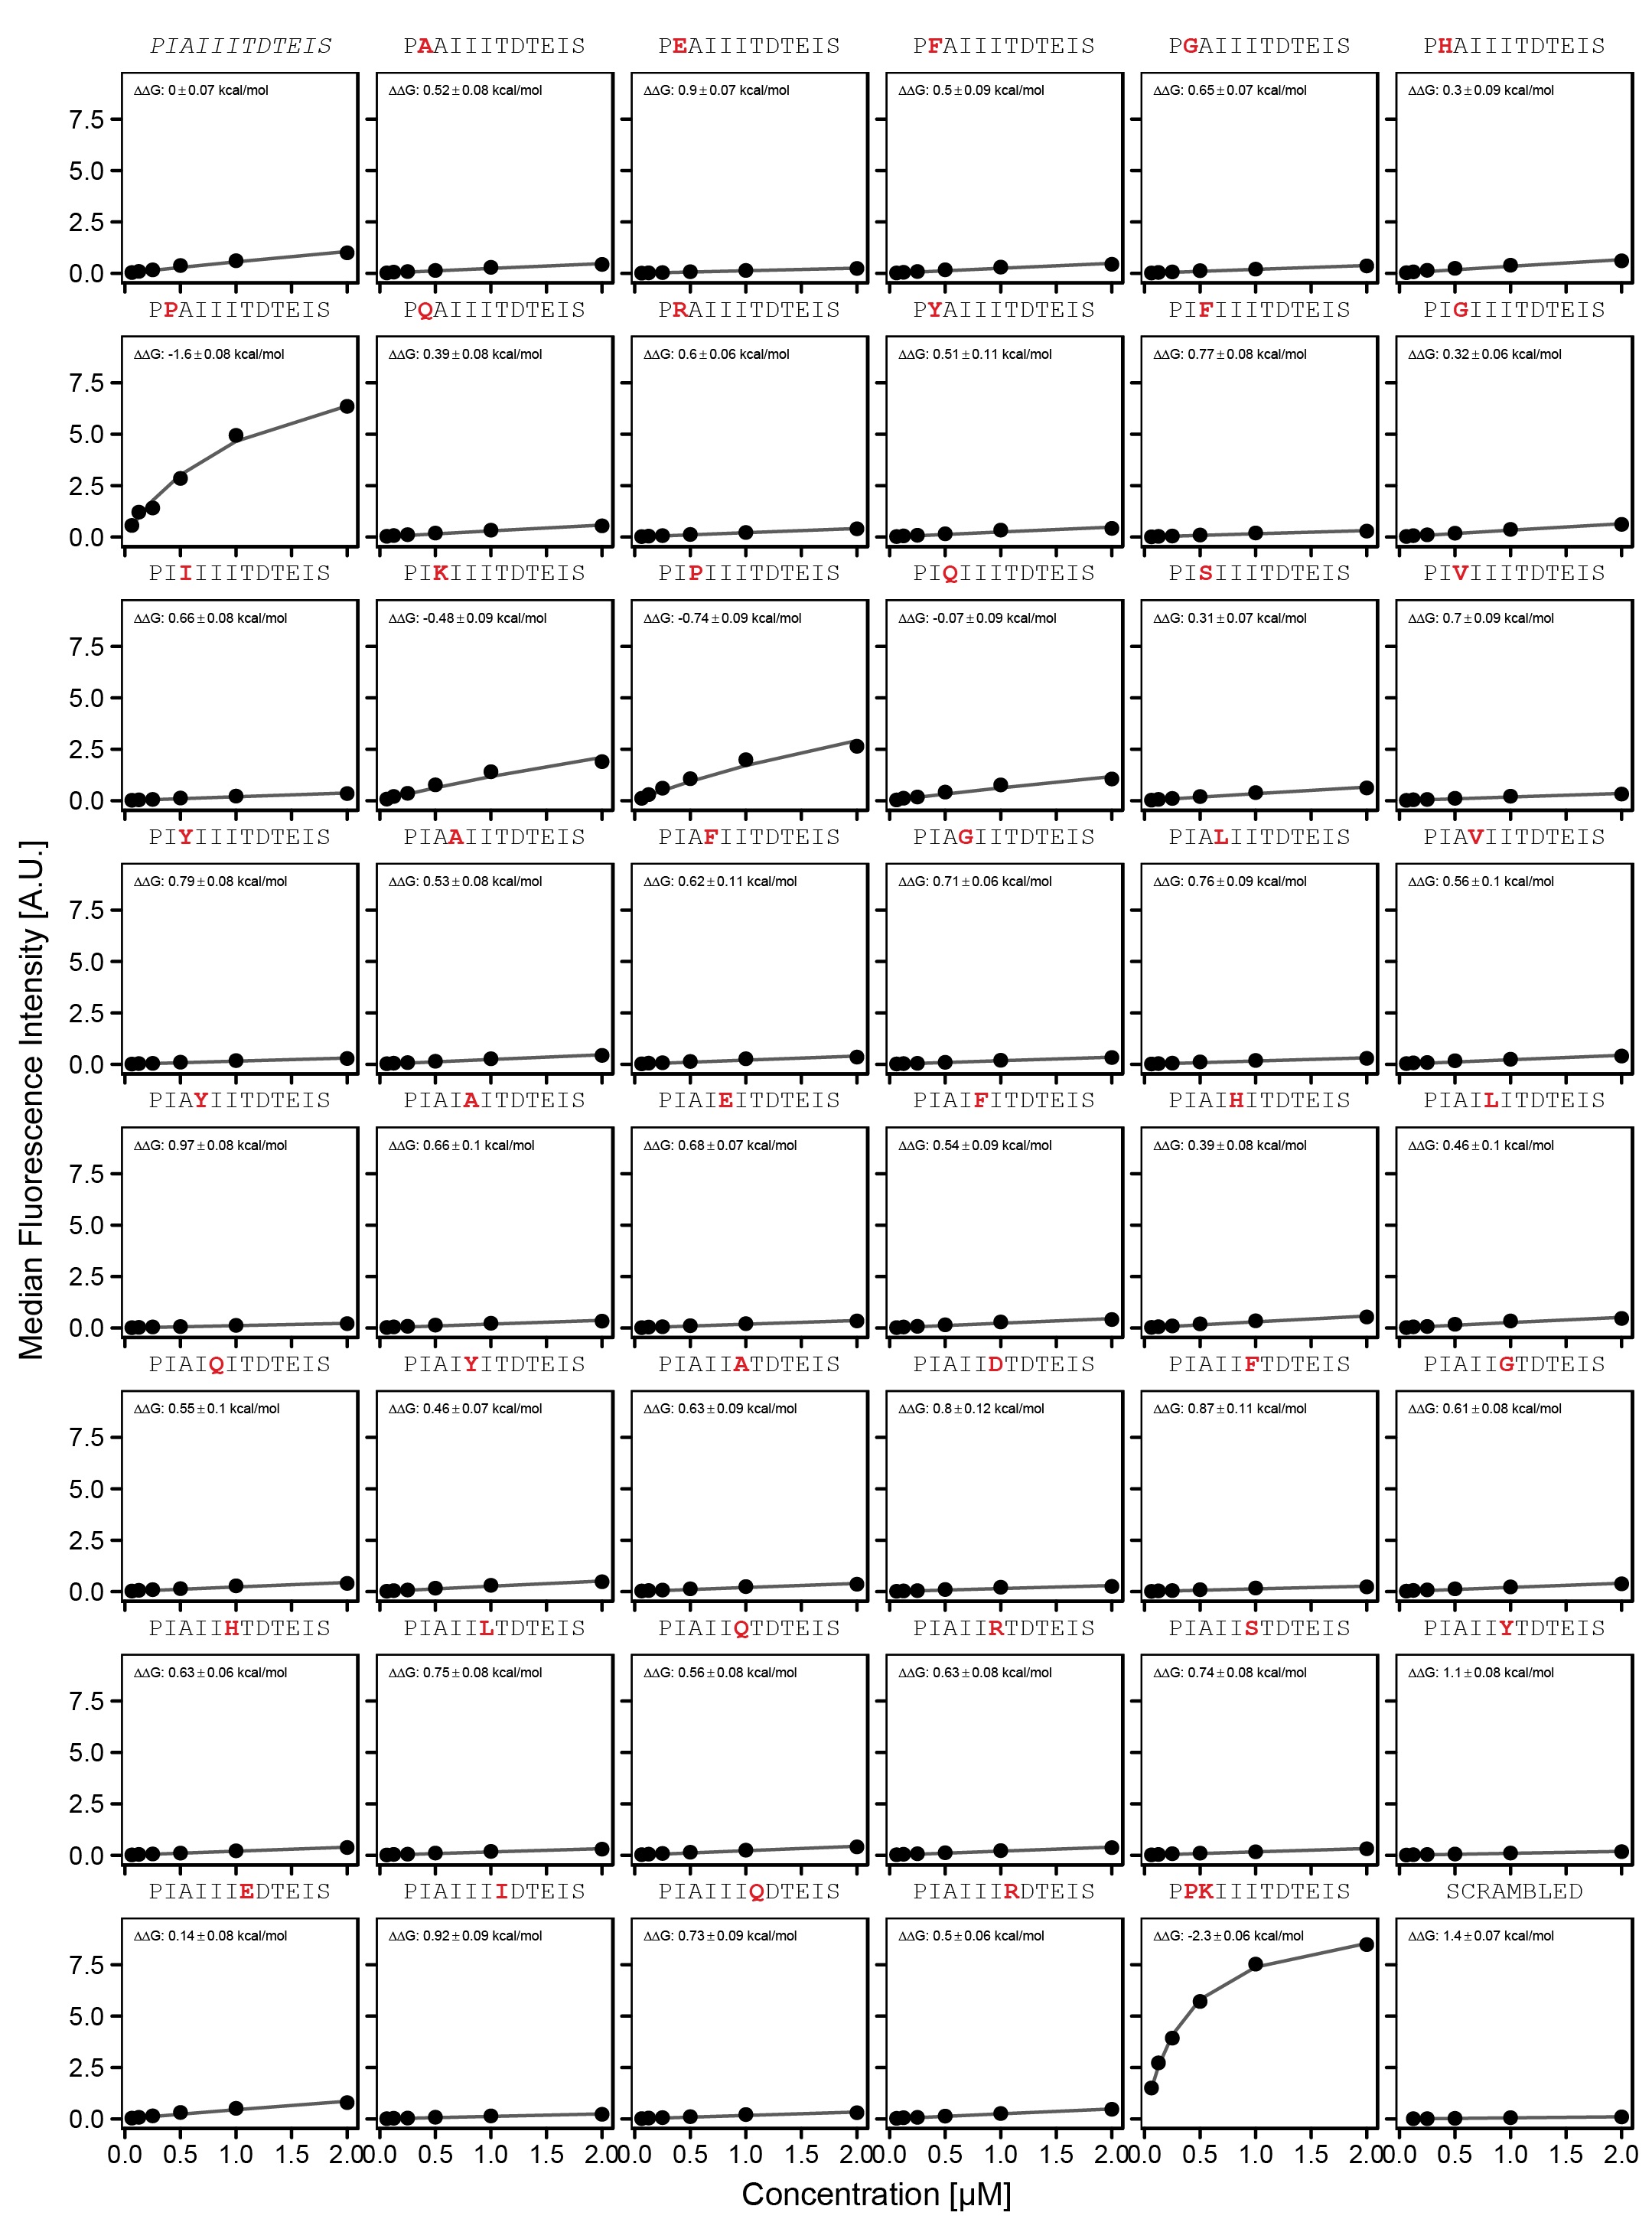

Supplement: supp [file elife-40499-supp-v1.zip › elife_poa_e40499_Figure_3_figure_supplement_7.jpg]

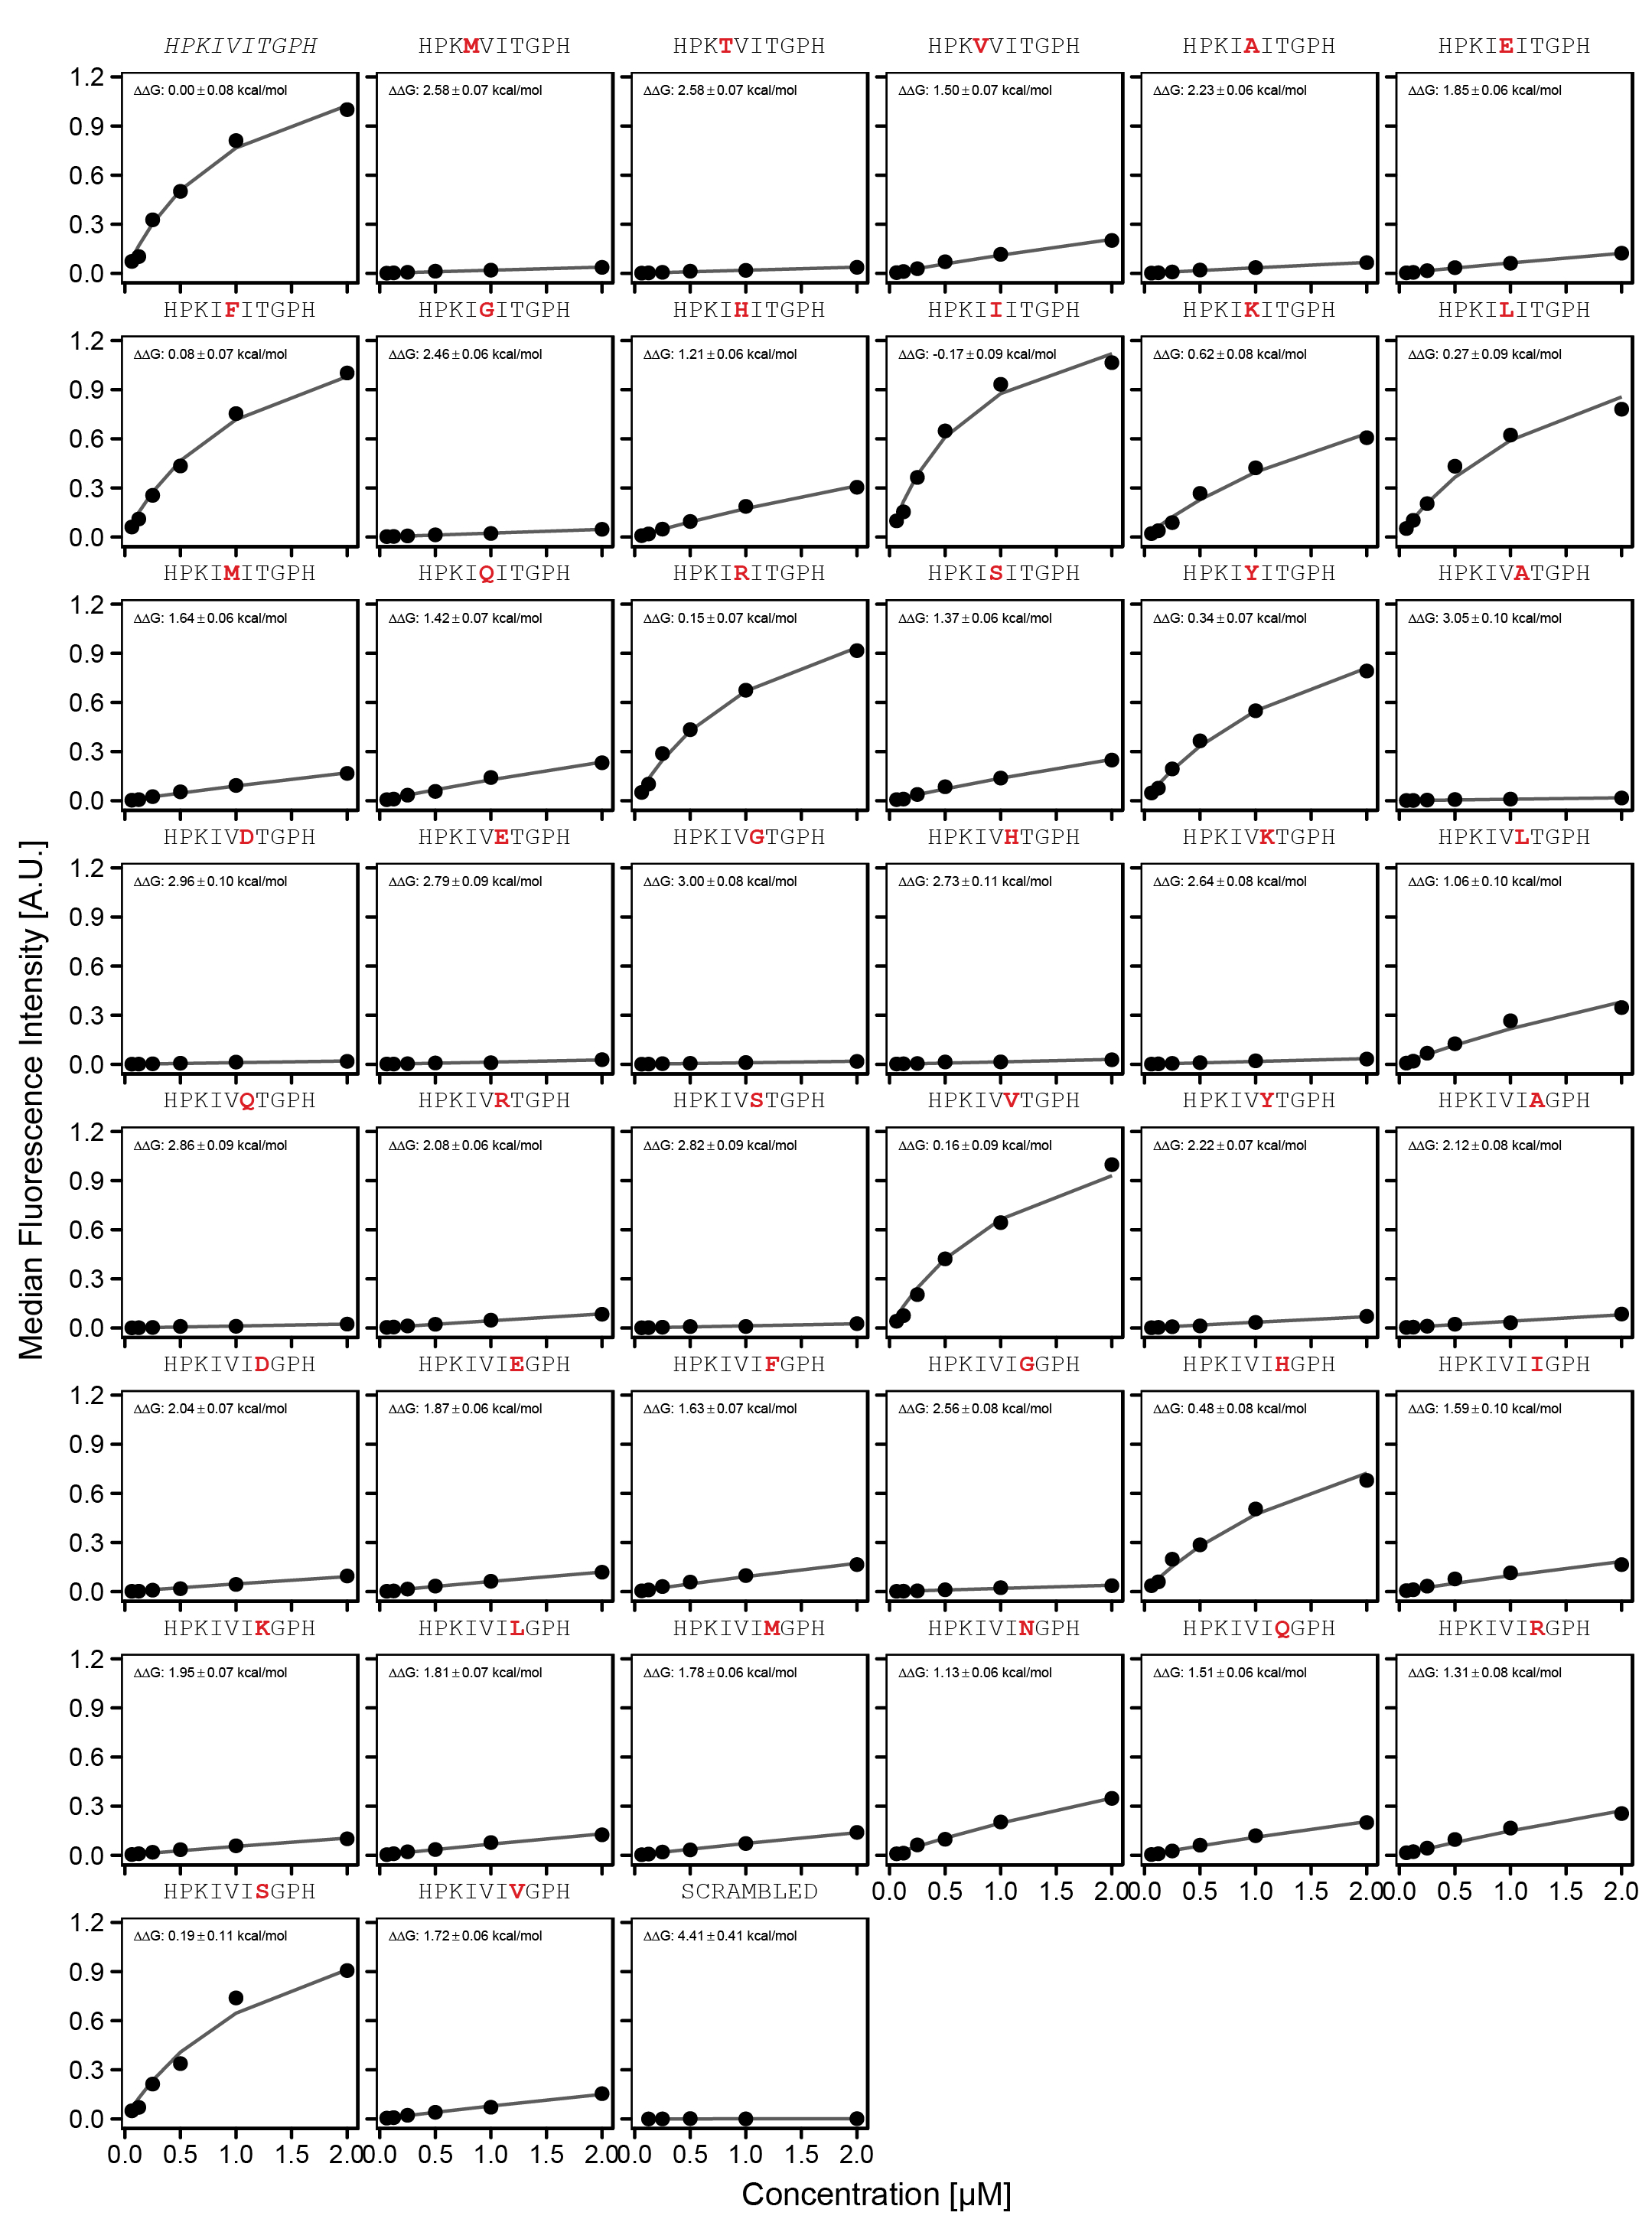

Supplement: supp [file elife-40499-supp-v1.zip › elife_poa_e40499_Figure_3_figure_supplement_3.jpg]

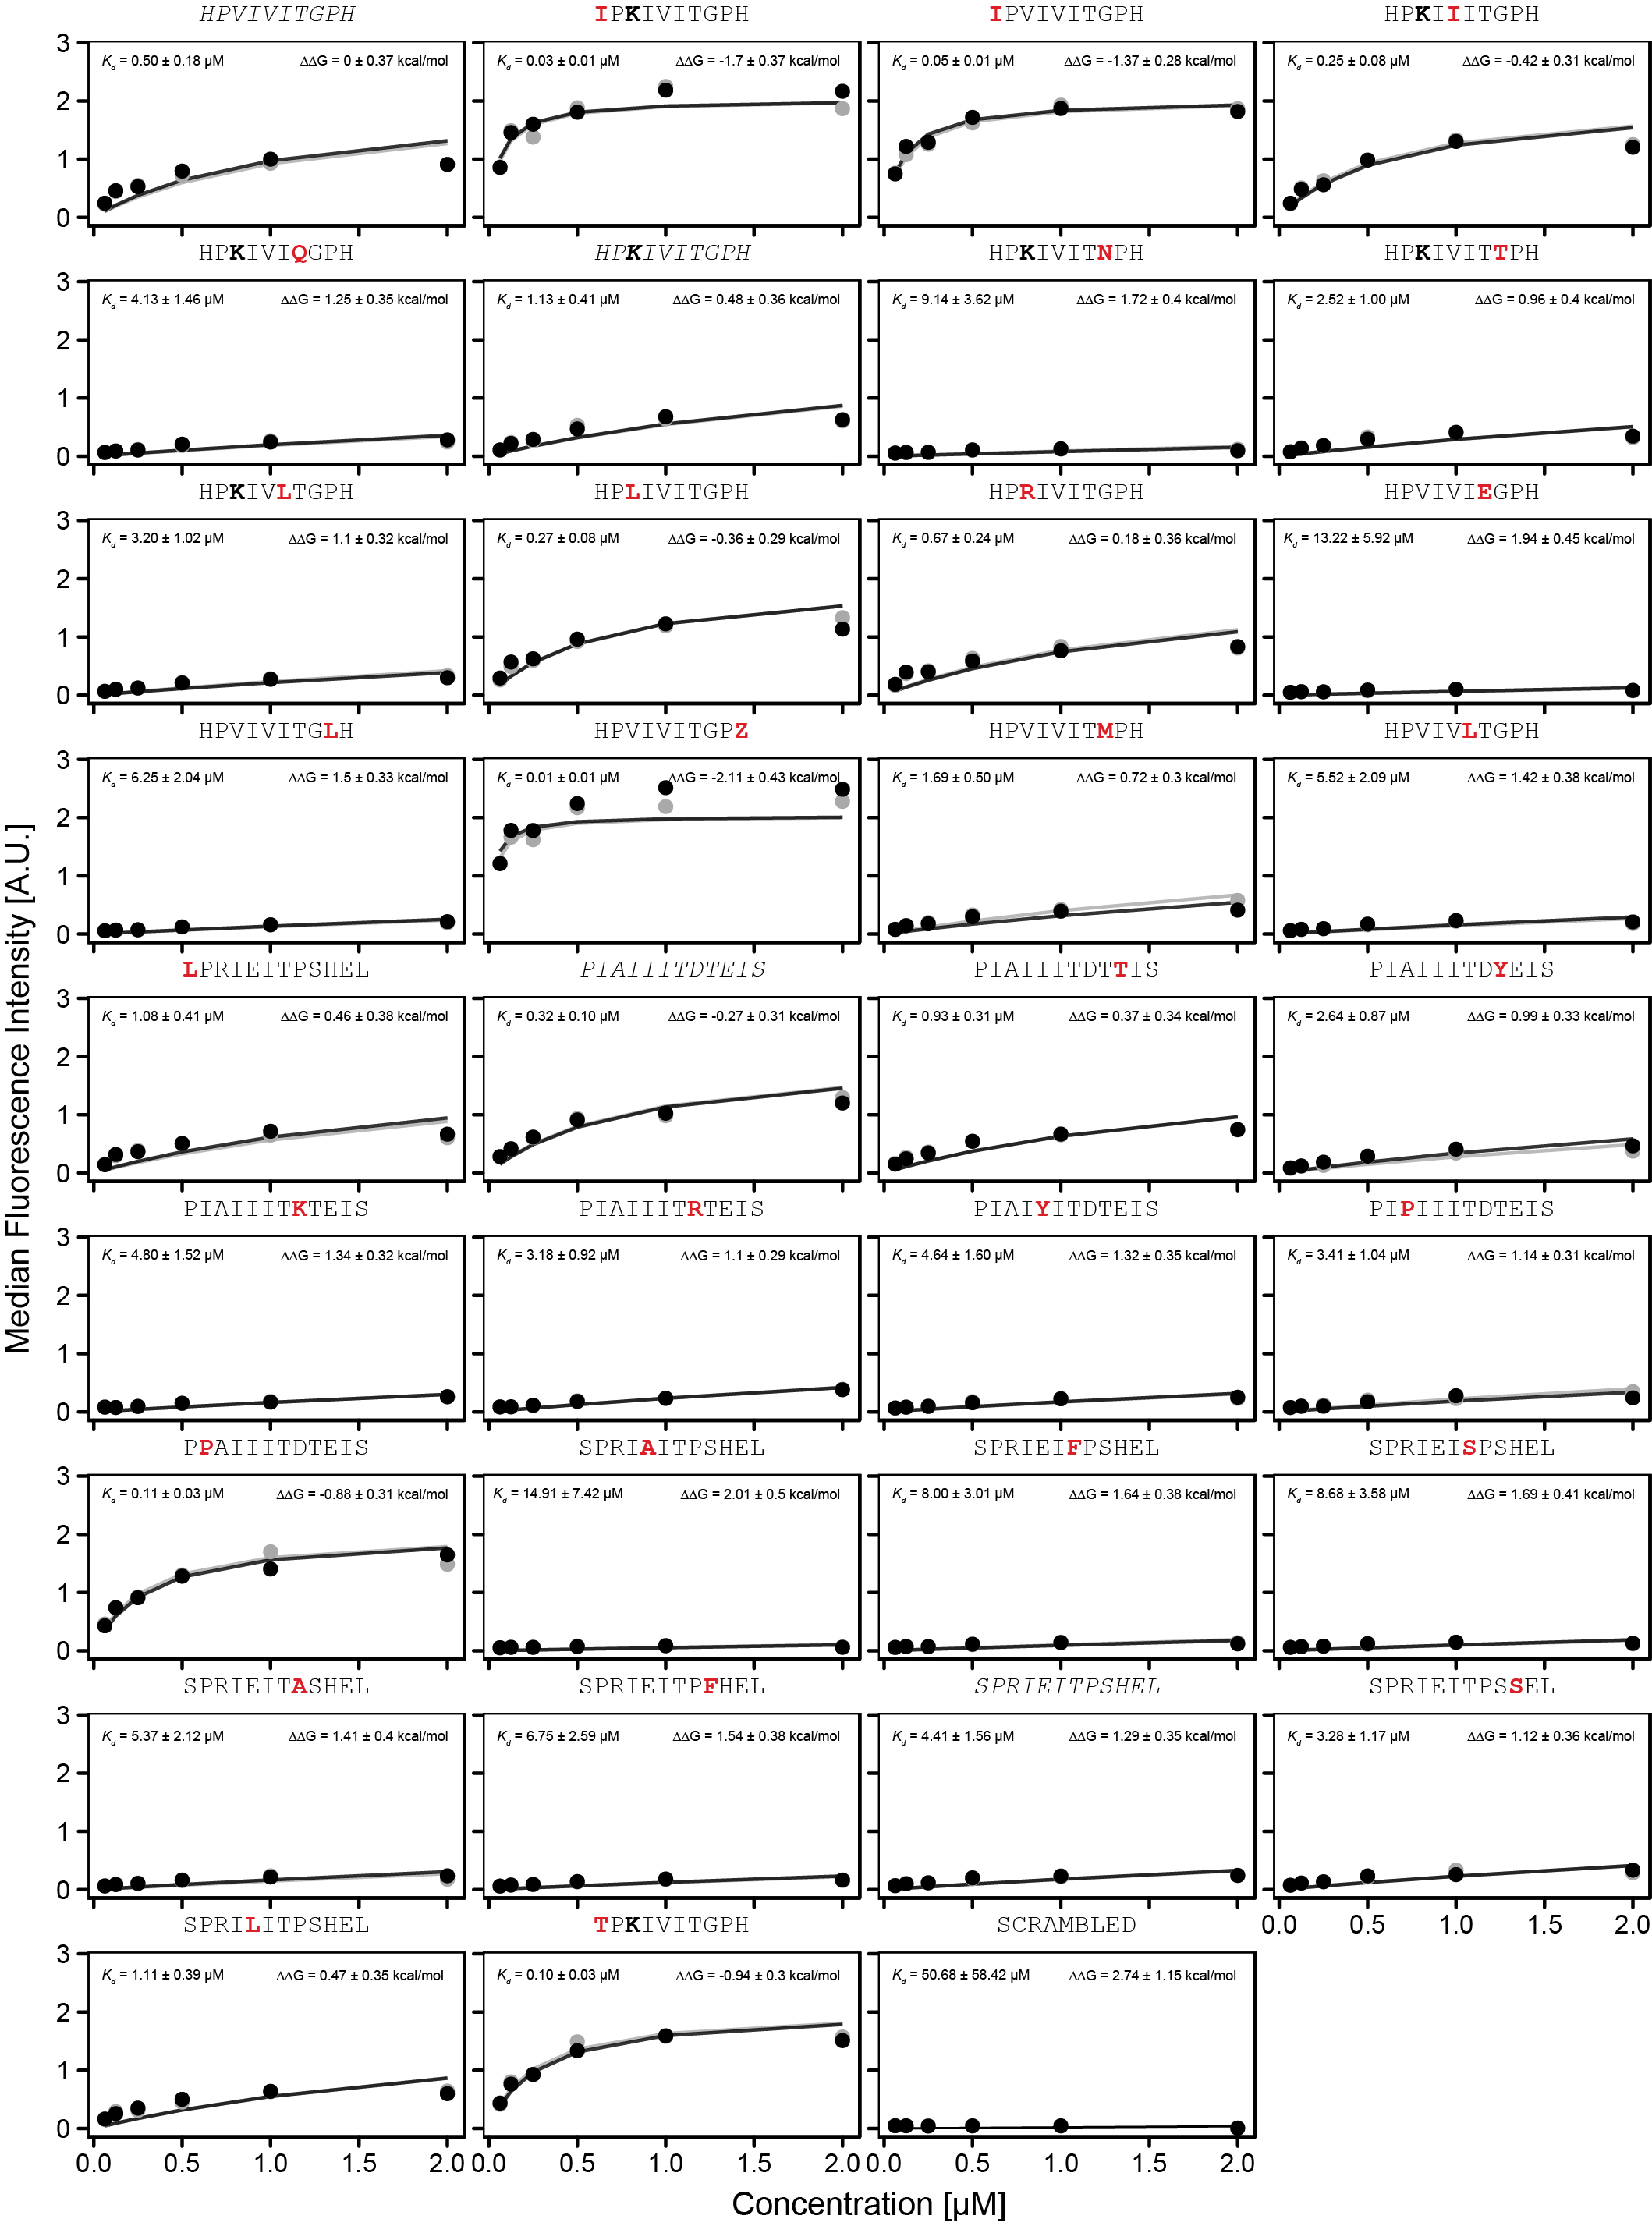

Supplement: supp [file elife-40499-supp-v1.zip › elife_poa_e40499_Figure_5_figure_supplement_2.jpg]

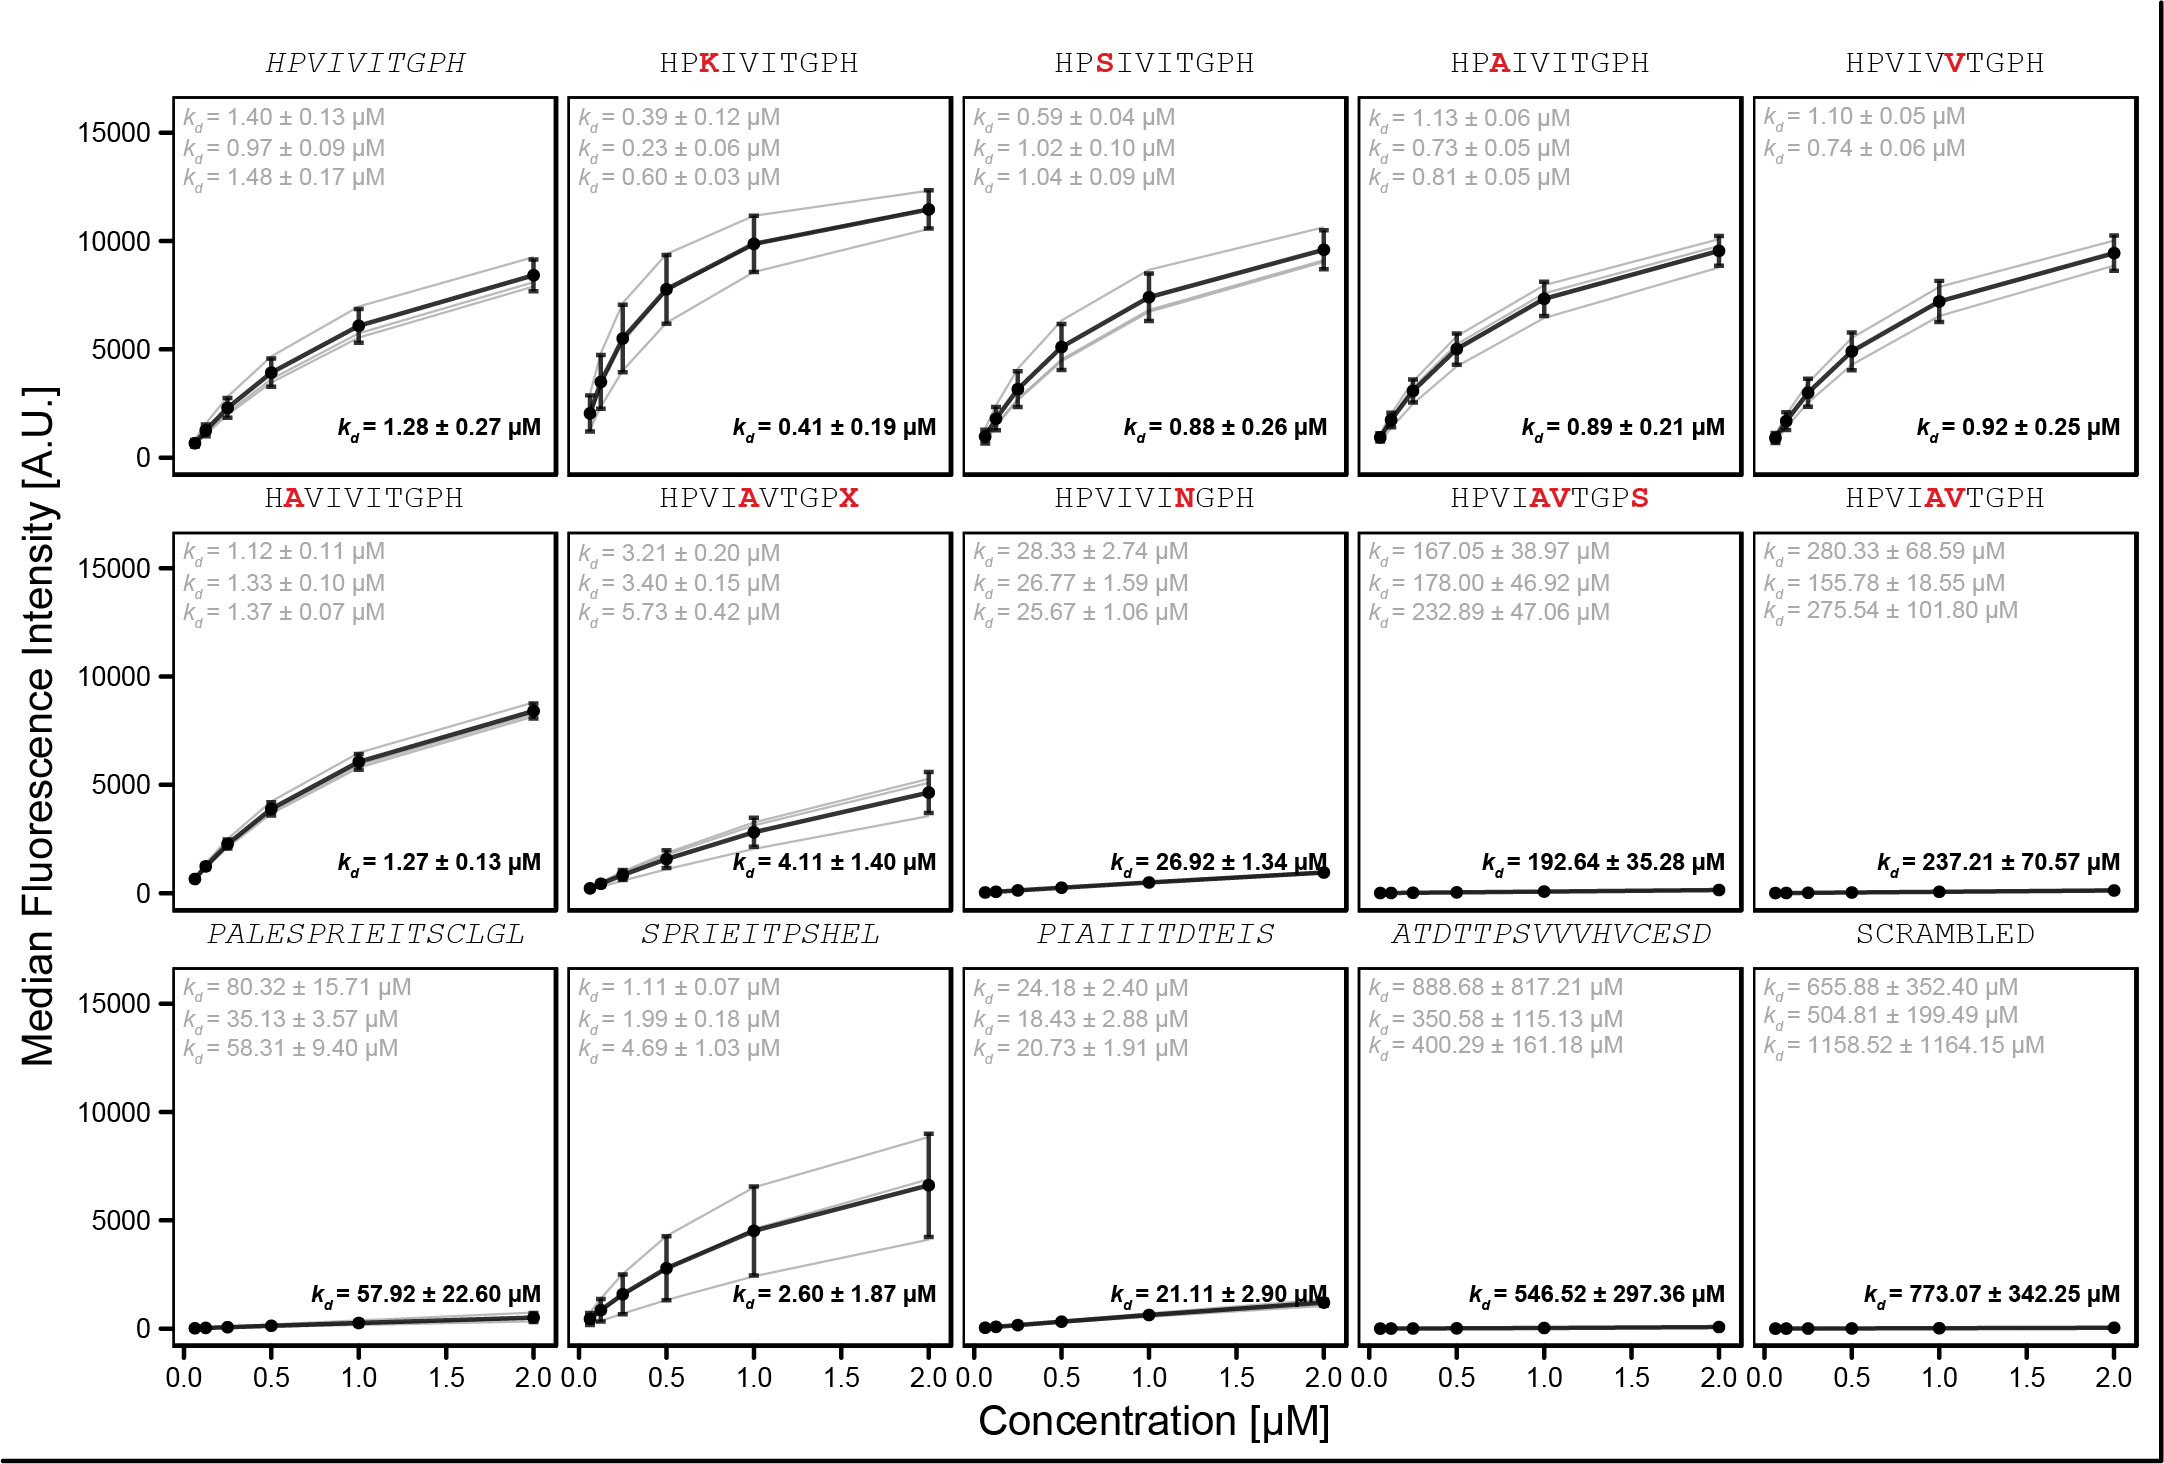

Supplement: supp [file elife-40499-supp-v1.zip › elife_poa_e40499_Figure_2_figure_supplement_3.jpg]

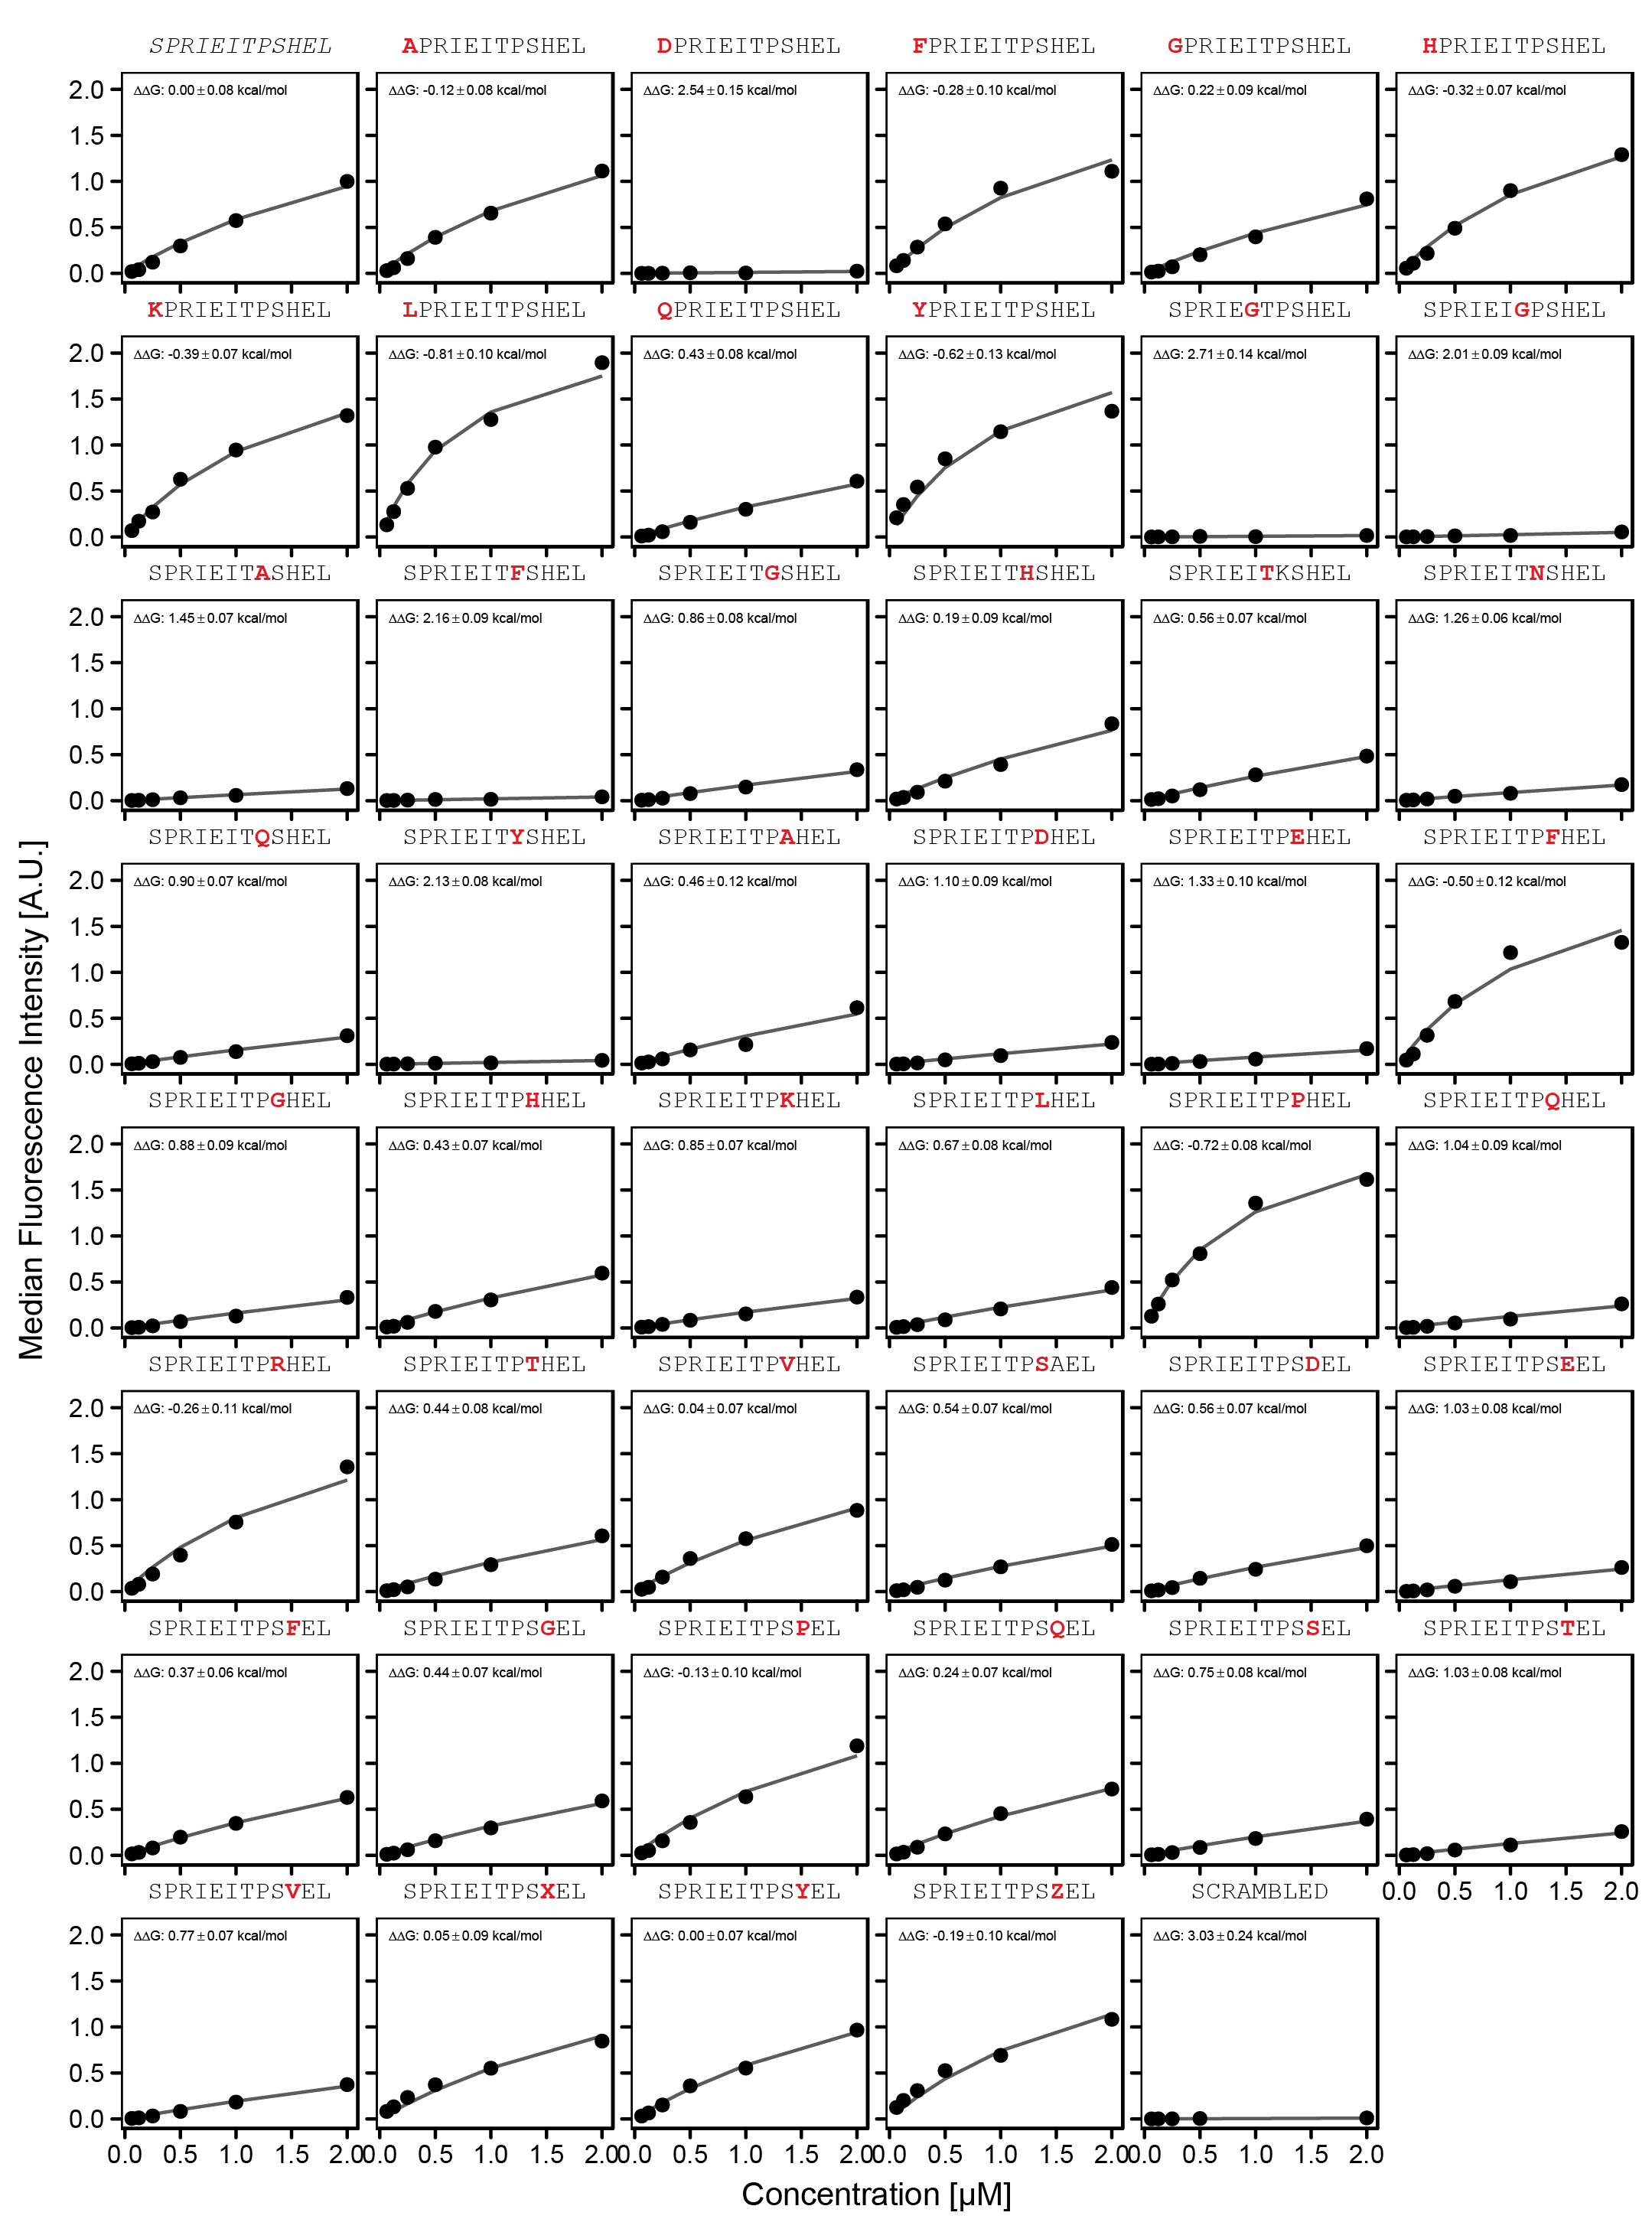

Supplement: supp [file elife-40499-supp-v1.zip › elife_poa_e40499_Figure_3_figure_supplement_6.jpg]

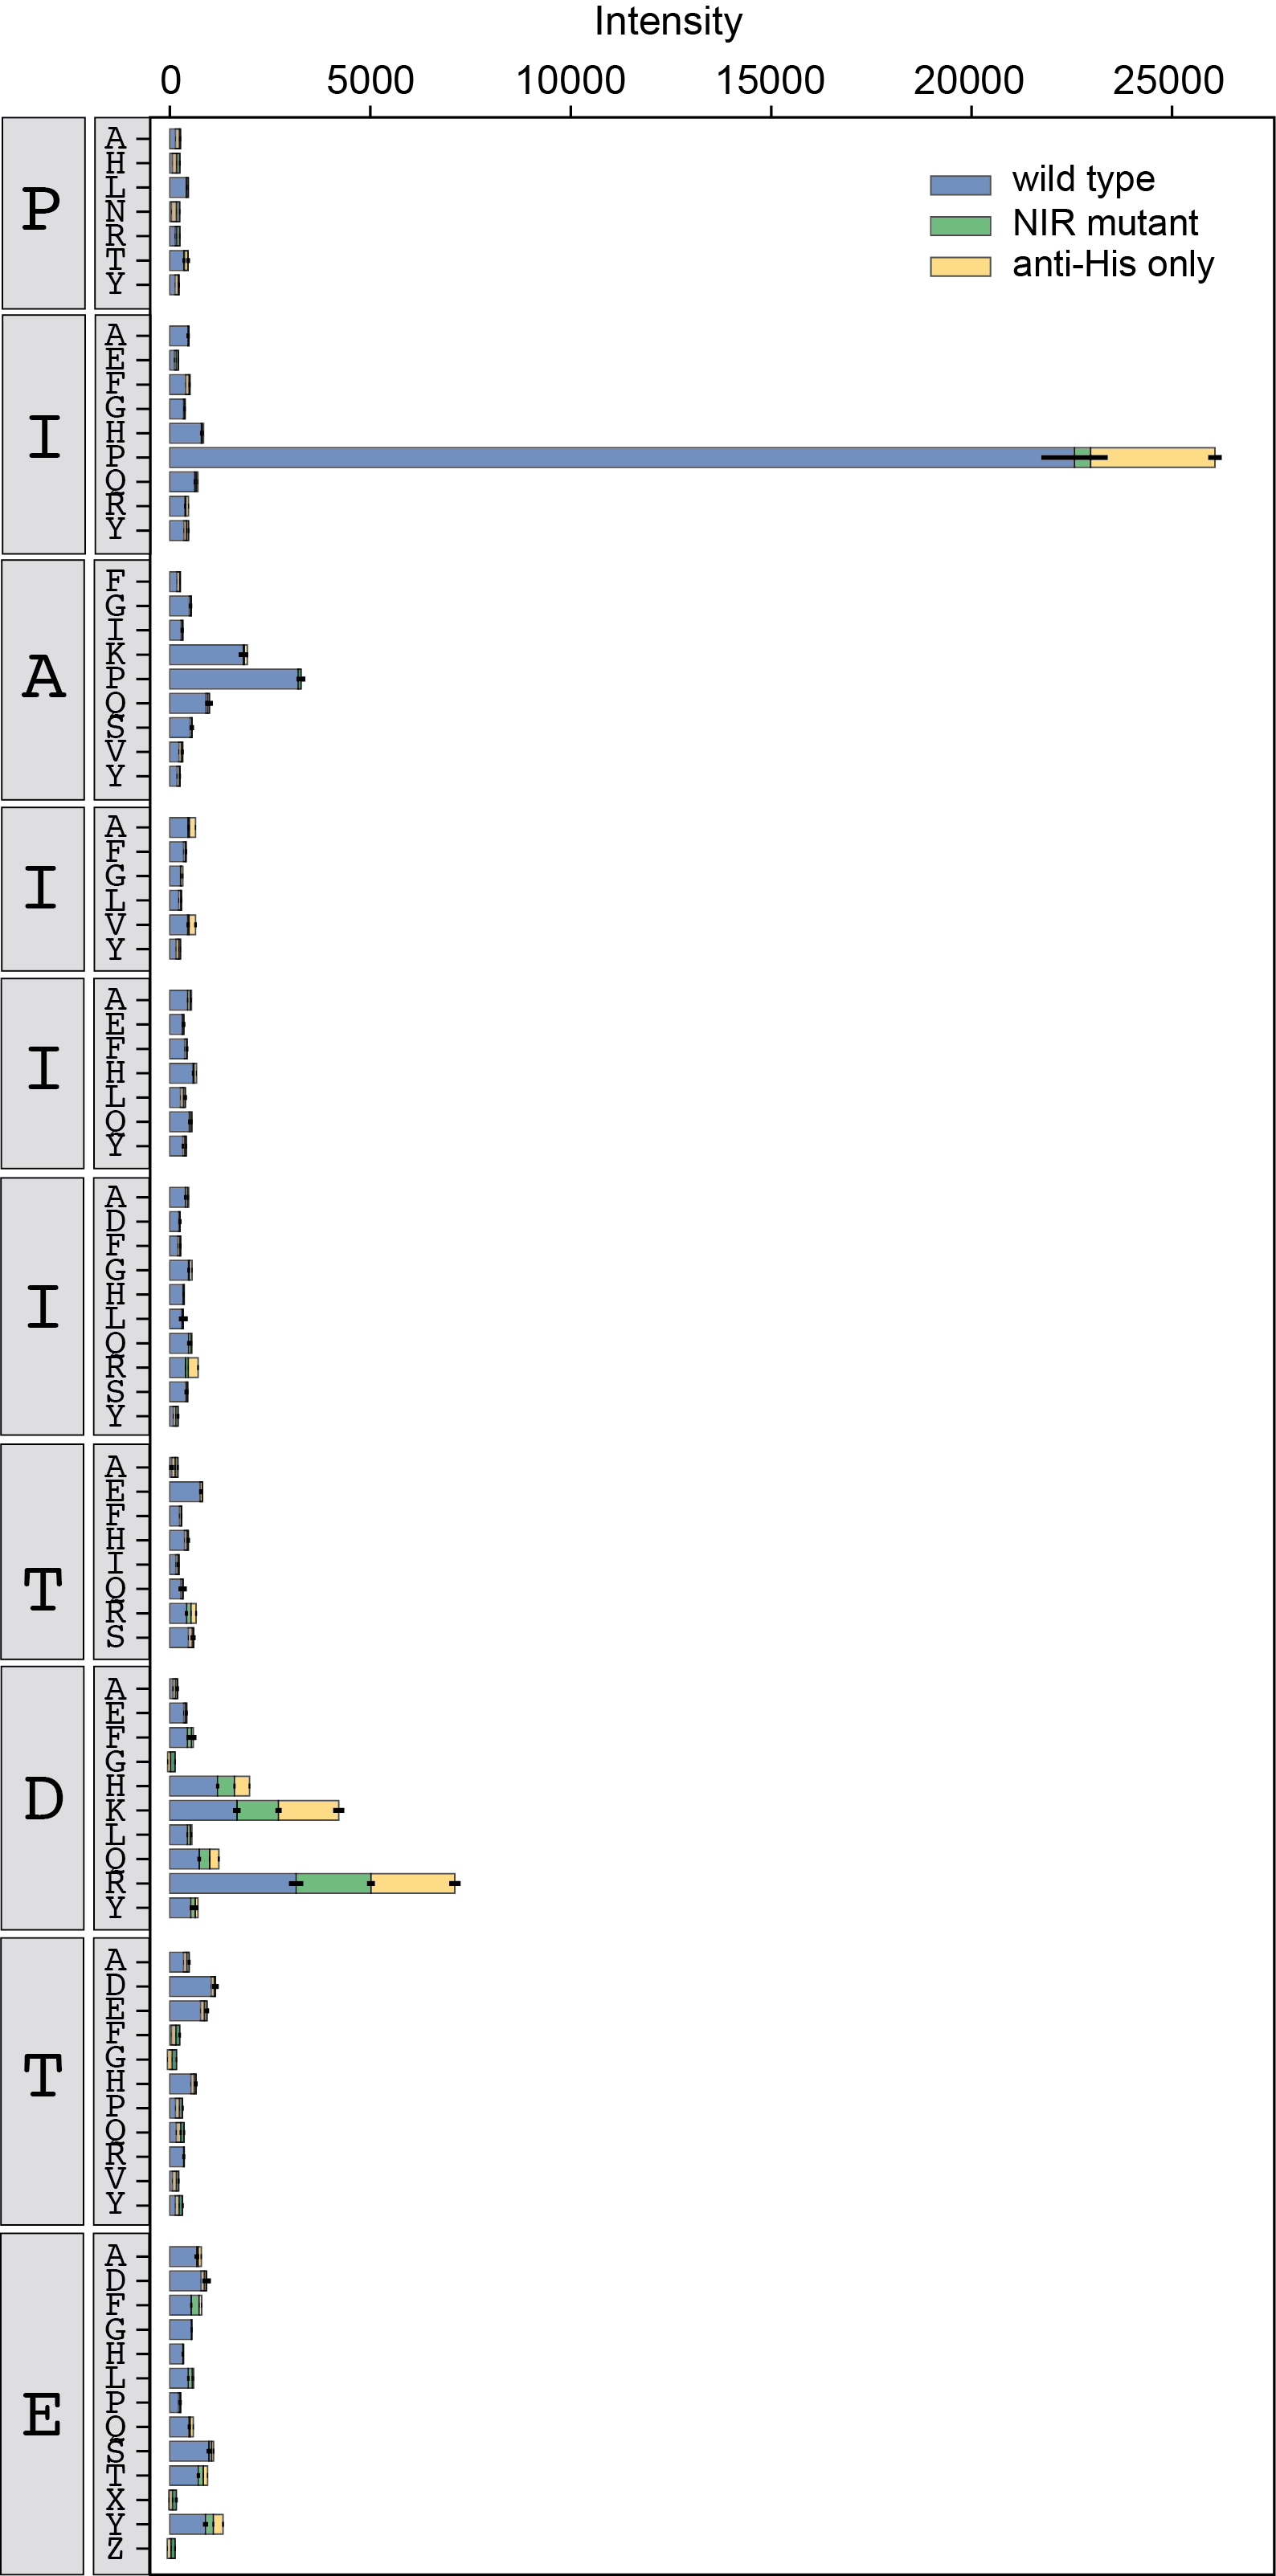

Supplement: supp [file elife-40499-supp-v1.zip › elife_poa_e40499_Figure_3_figure_supplement_12.jpg]

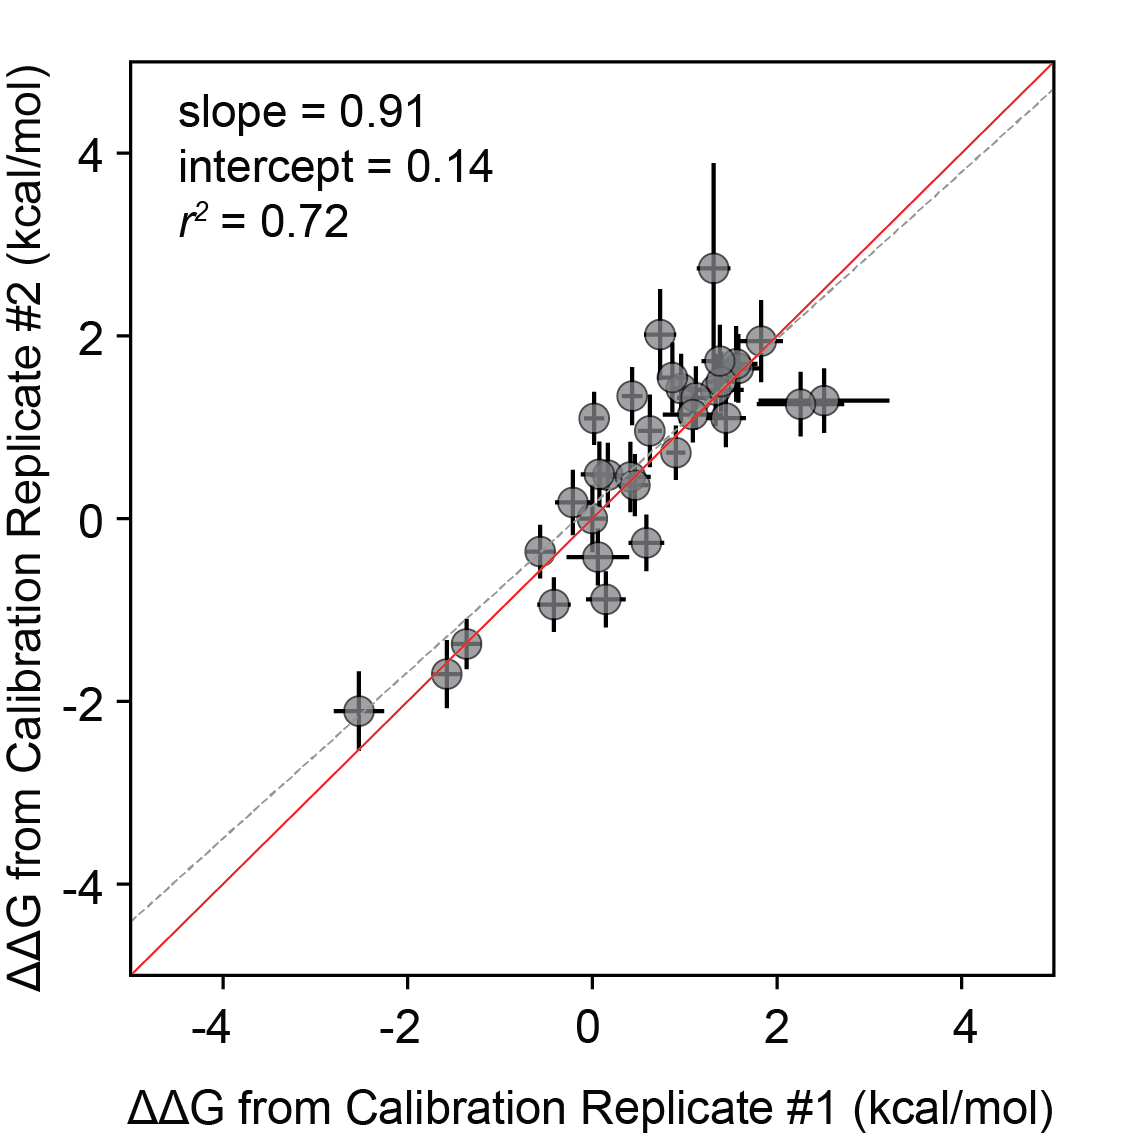

Supplement: supp [file elife-40499-supp-v1.zip › elife_poa_e40499_Figure_5_figure_supplement_3.jpg]

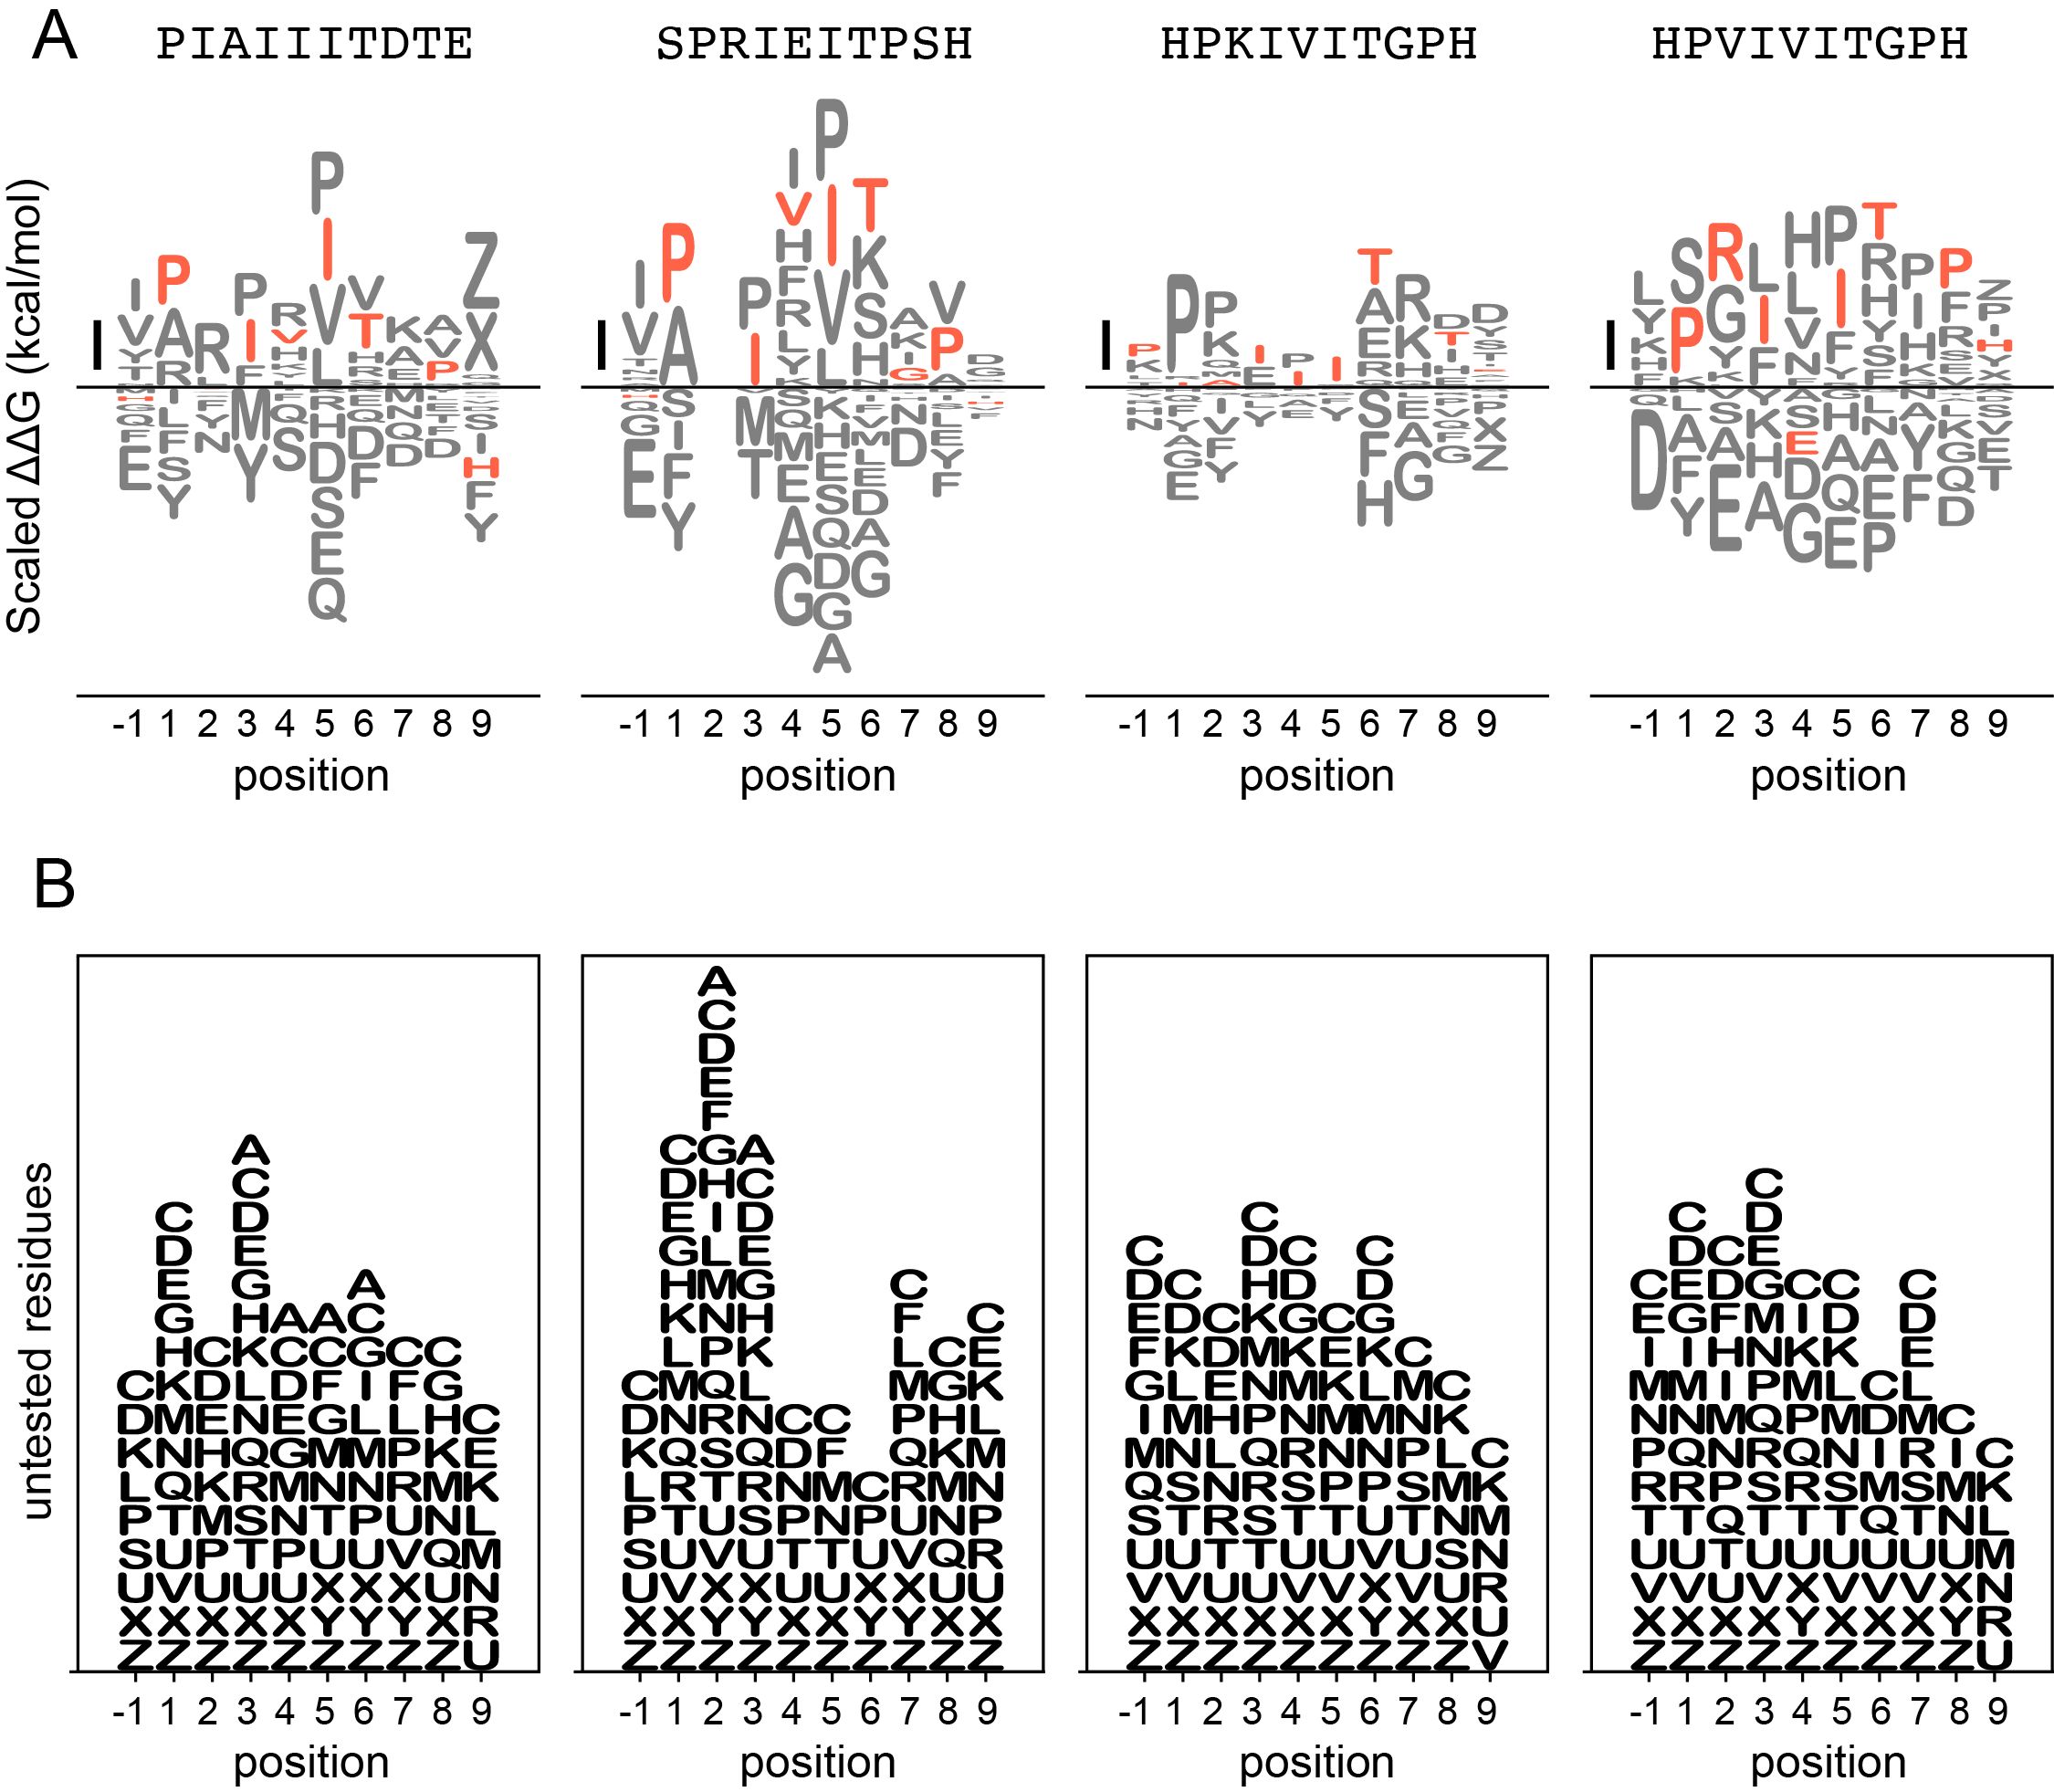

Supplement: supp [file elife-40499-supp-v1.zip › elife_poa_e40499_Figure_3_figure_supplement_22.jpg]

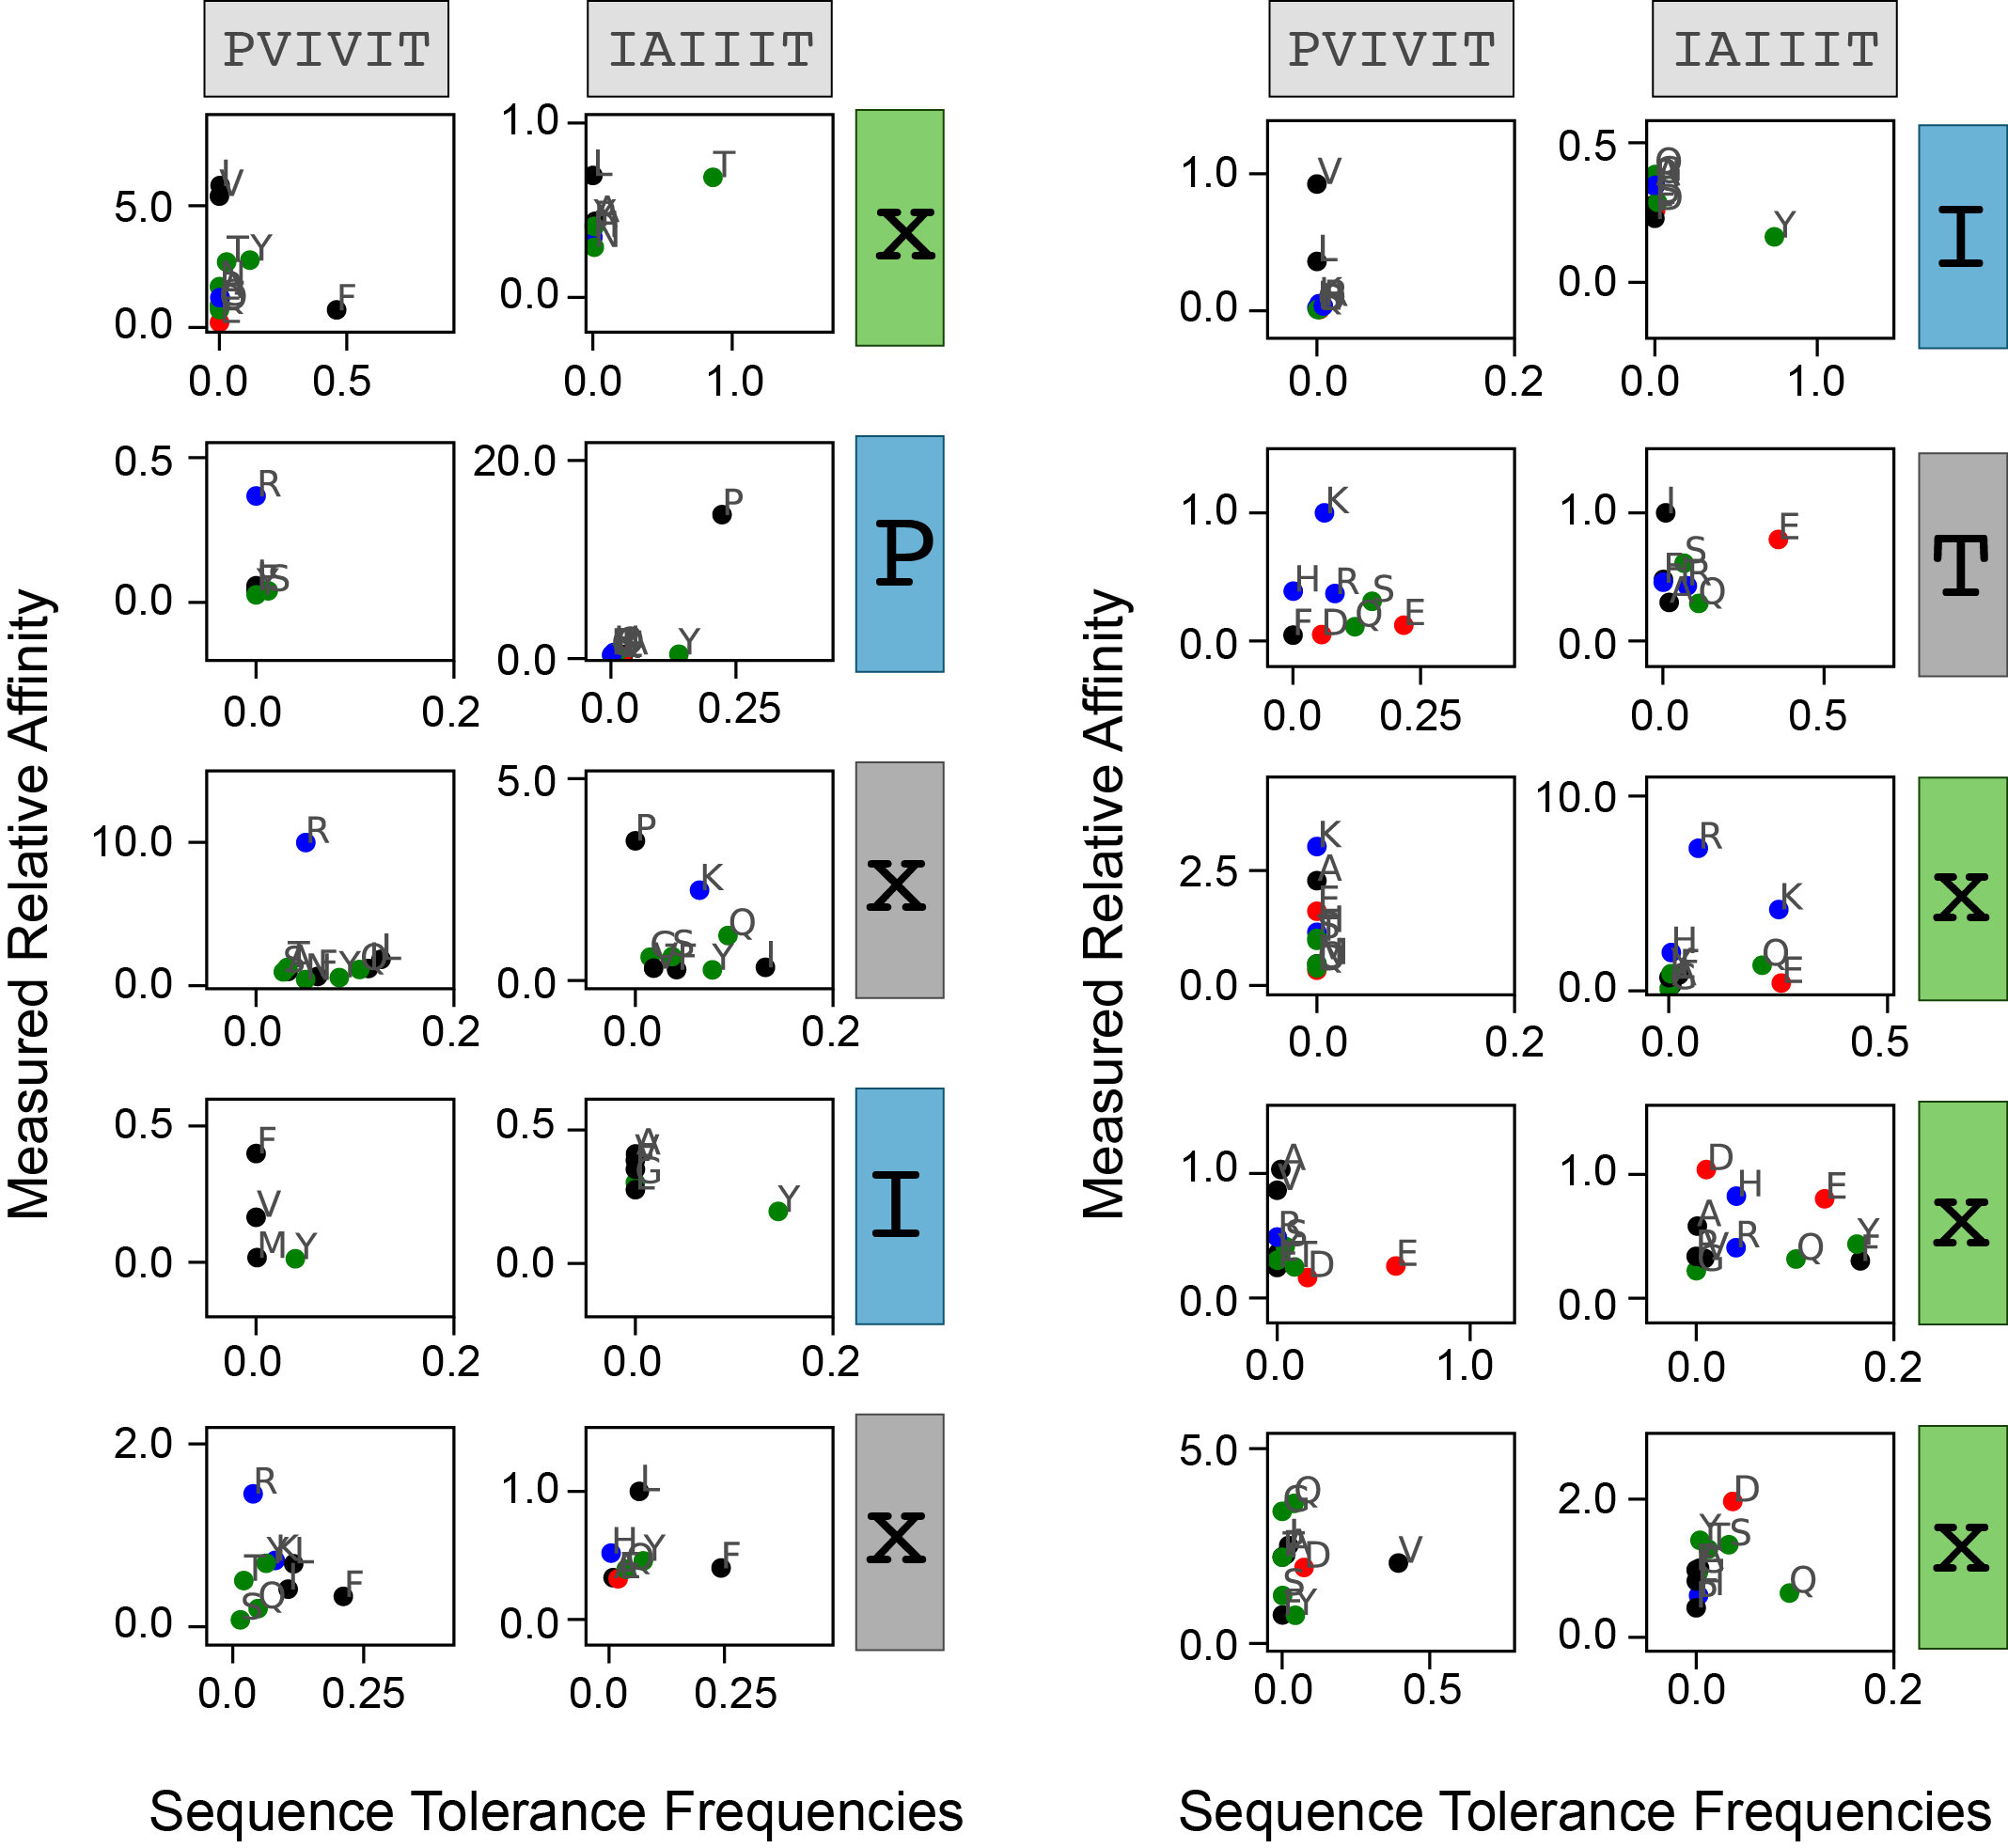

Supplement: supp [file elife-40499-supp-v1.zip › elife_poa_e40499_Figure_4_figure_supplement_4.jpg]

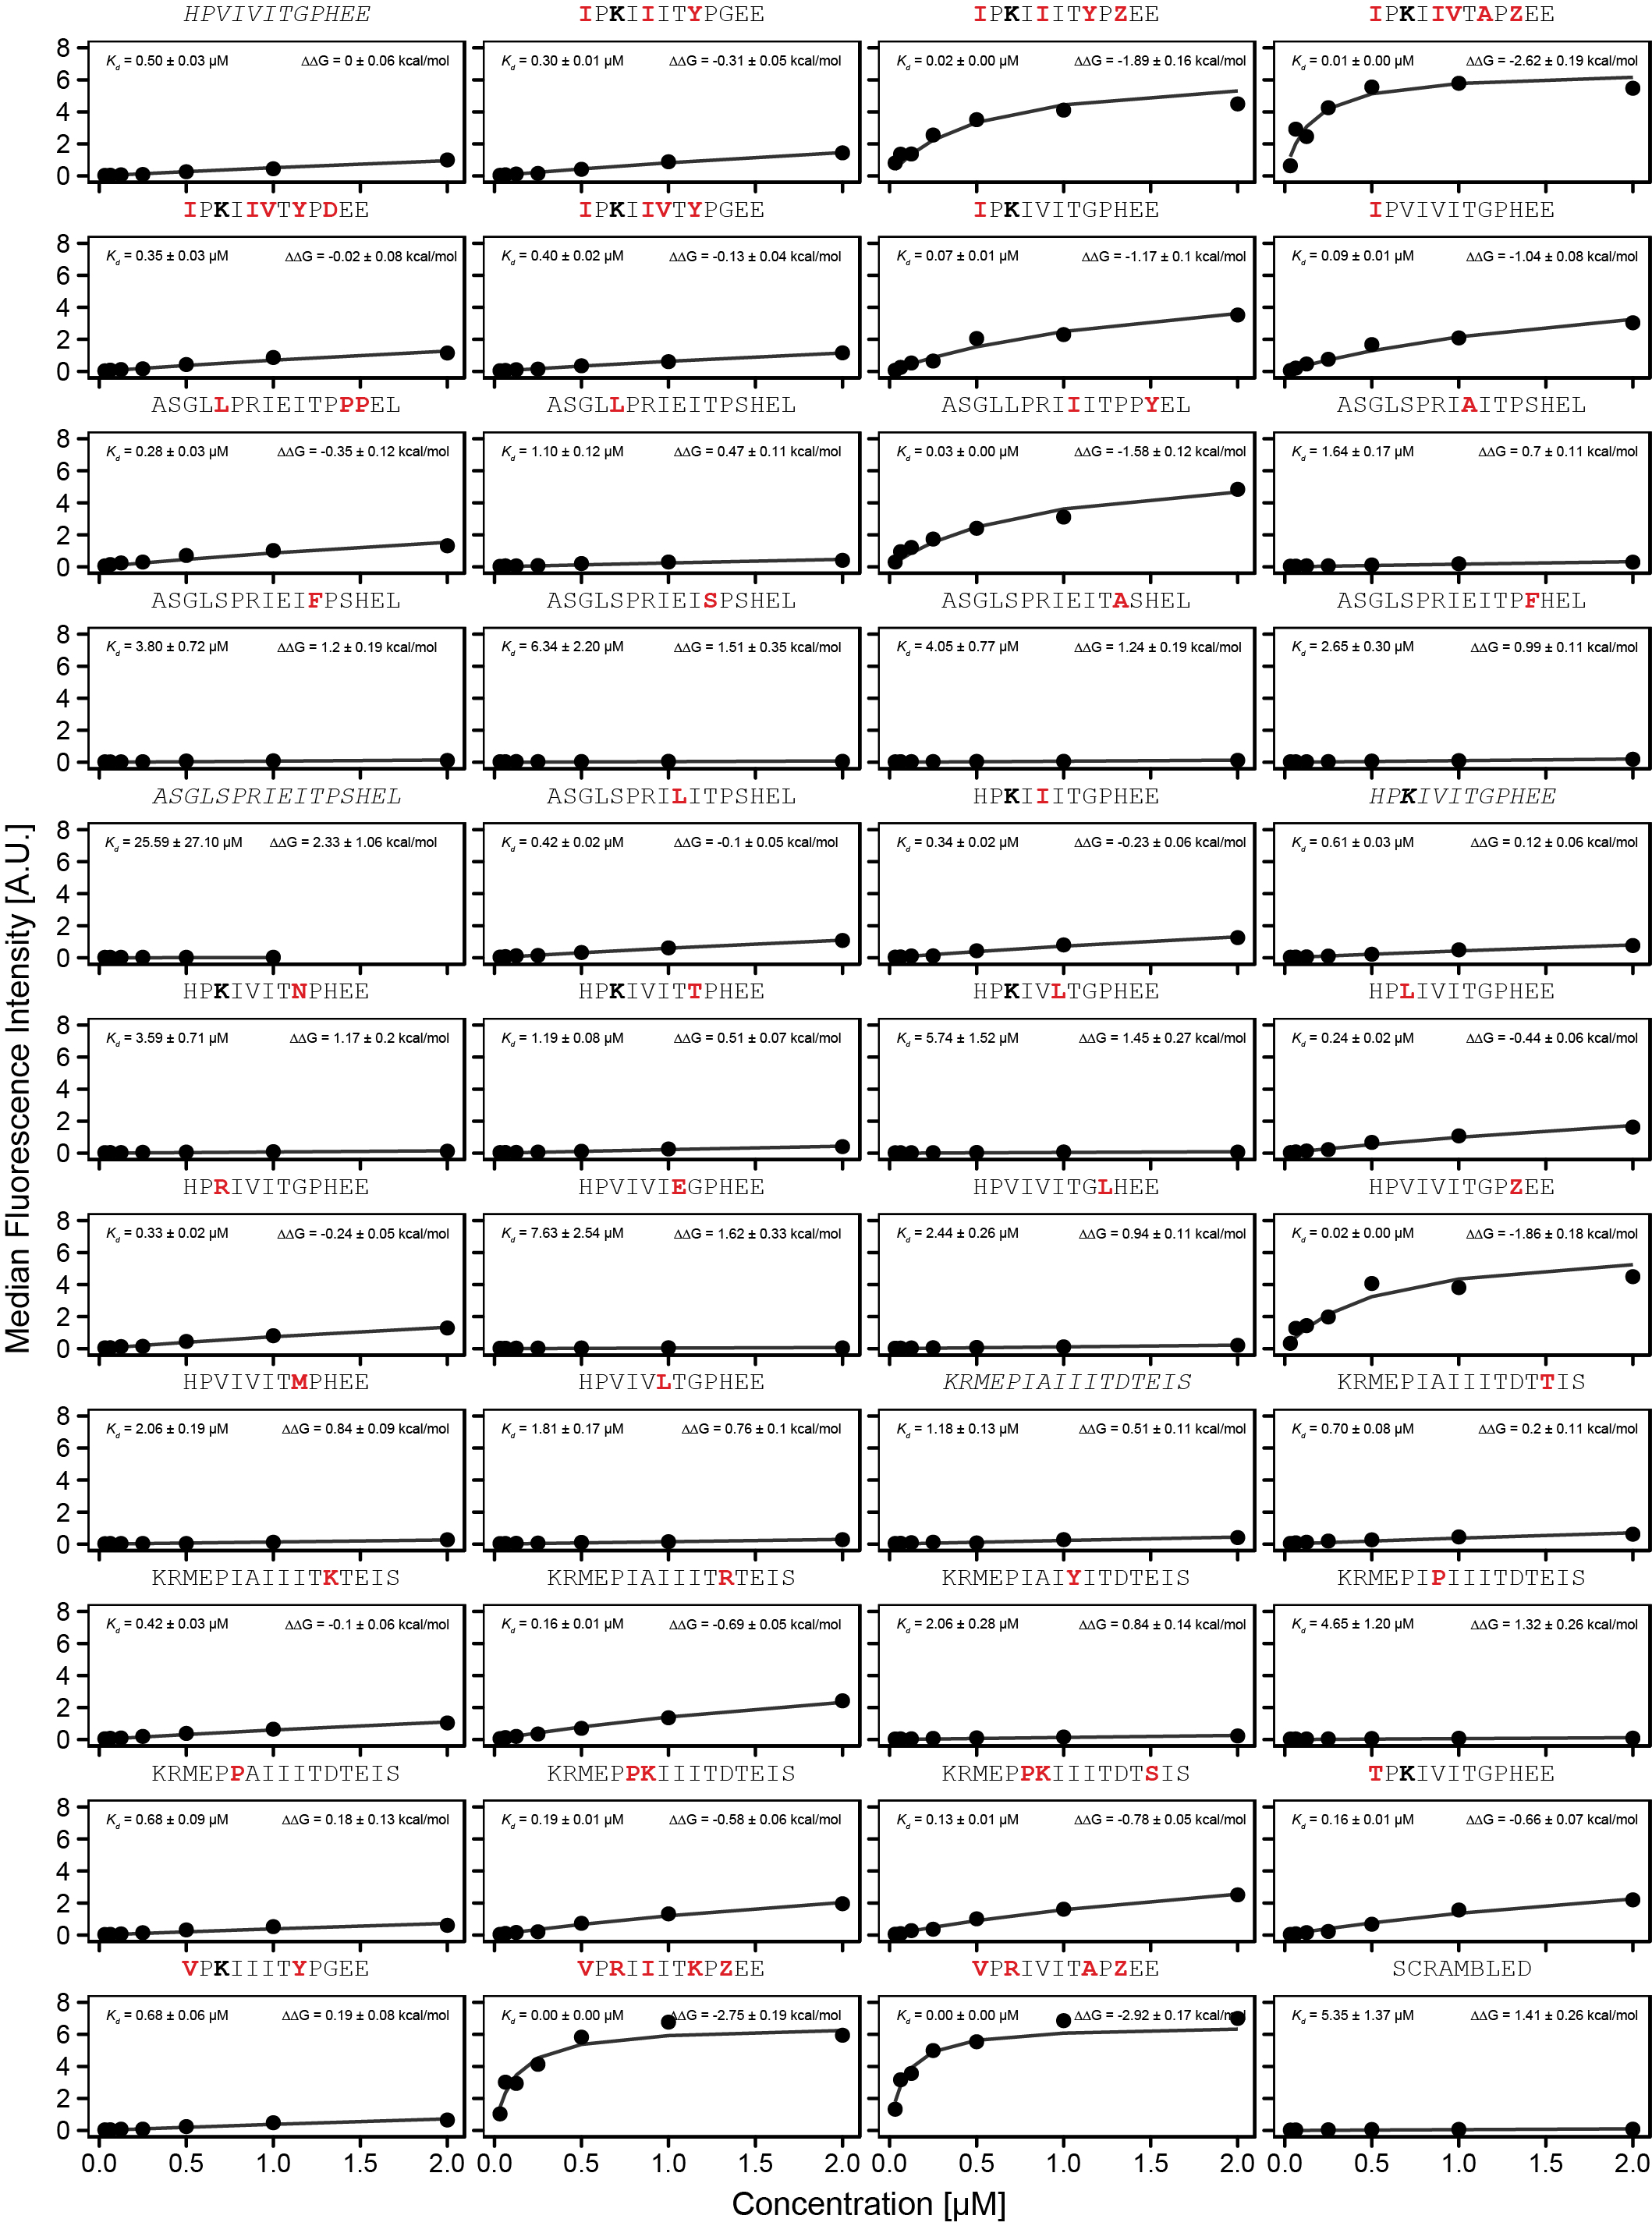

Supplement: supp [file elife-40499-supp-v1.zip › elife_poa_e40499_Figure_5_figure_supplement_5.jpg]

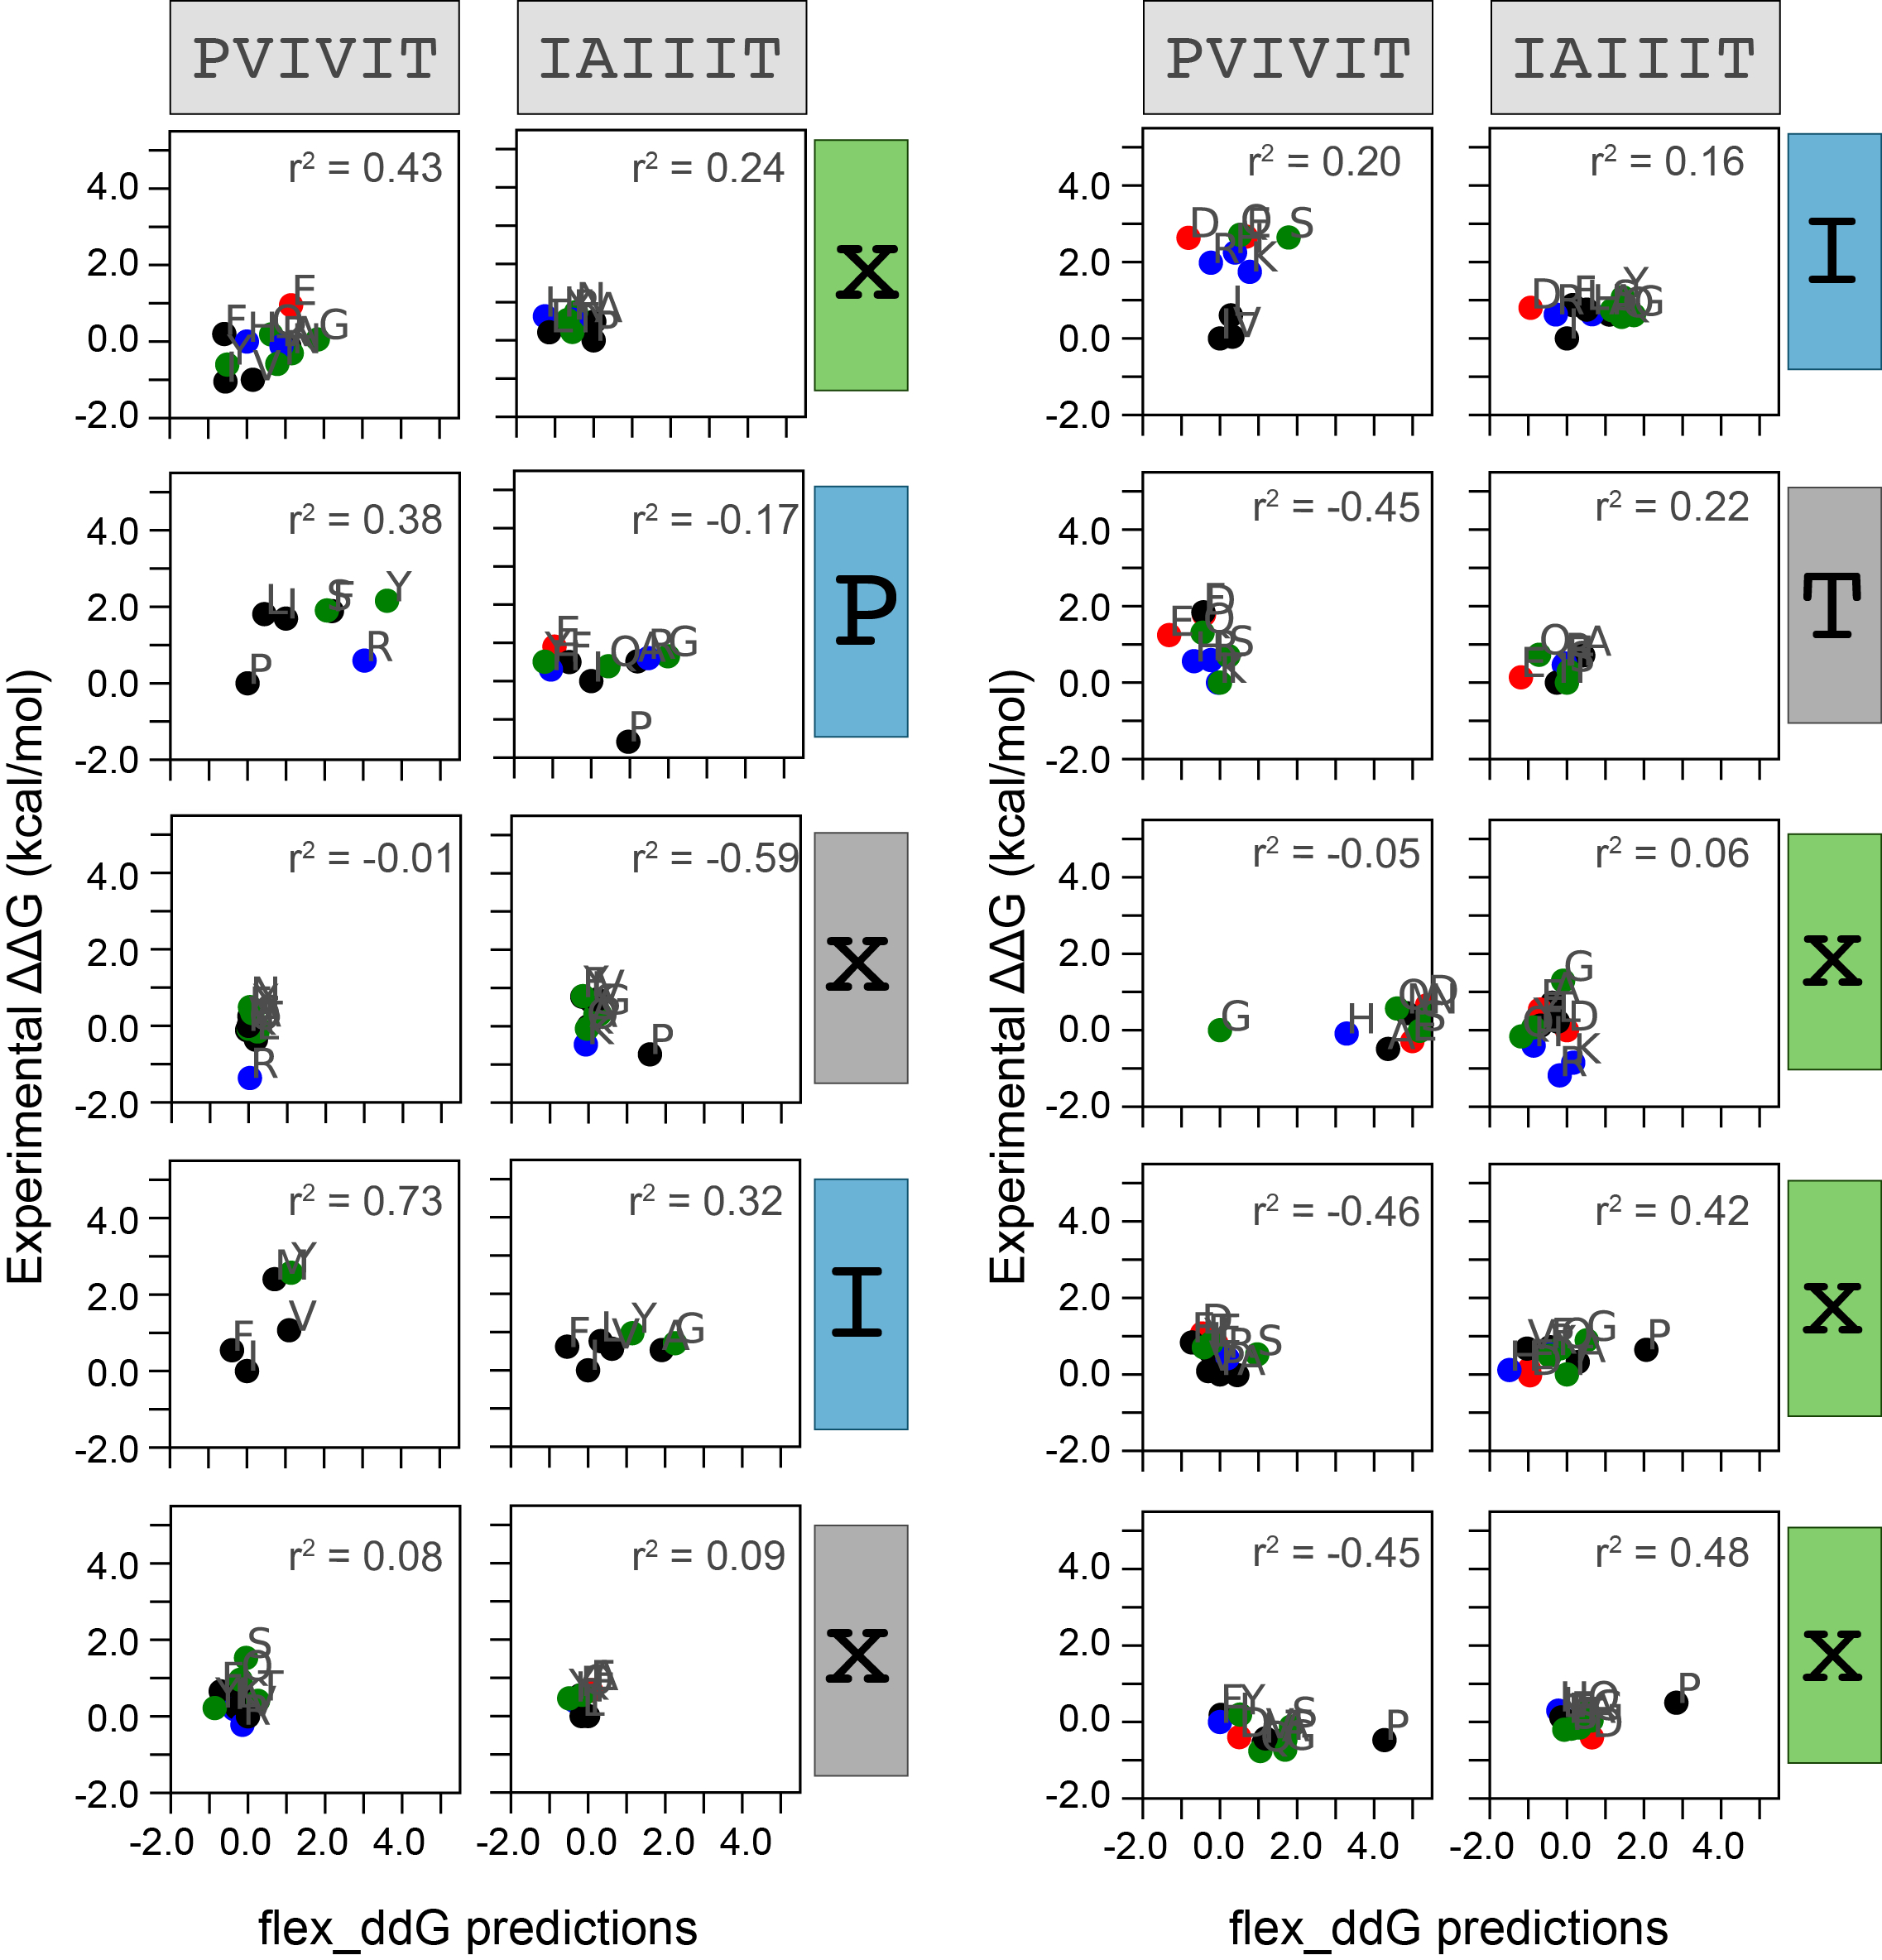

Supplement: supp [file elife-40499-supp-v1.zip › elife_poa_e40499_Figure_4_figure_supplement_5.jpg]

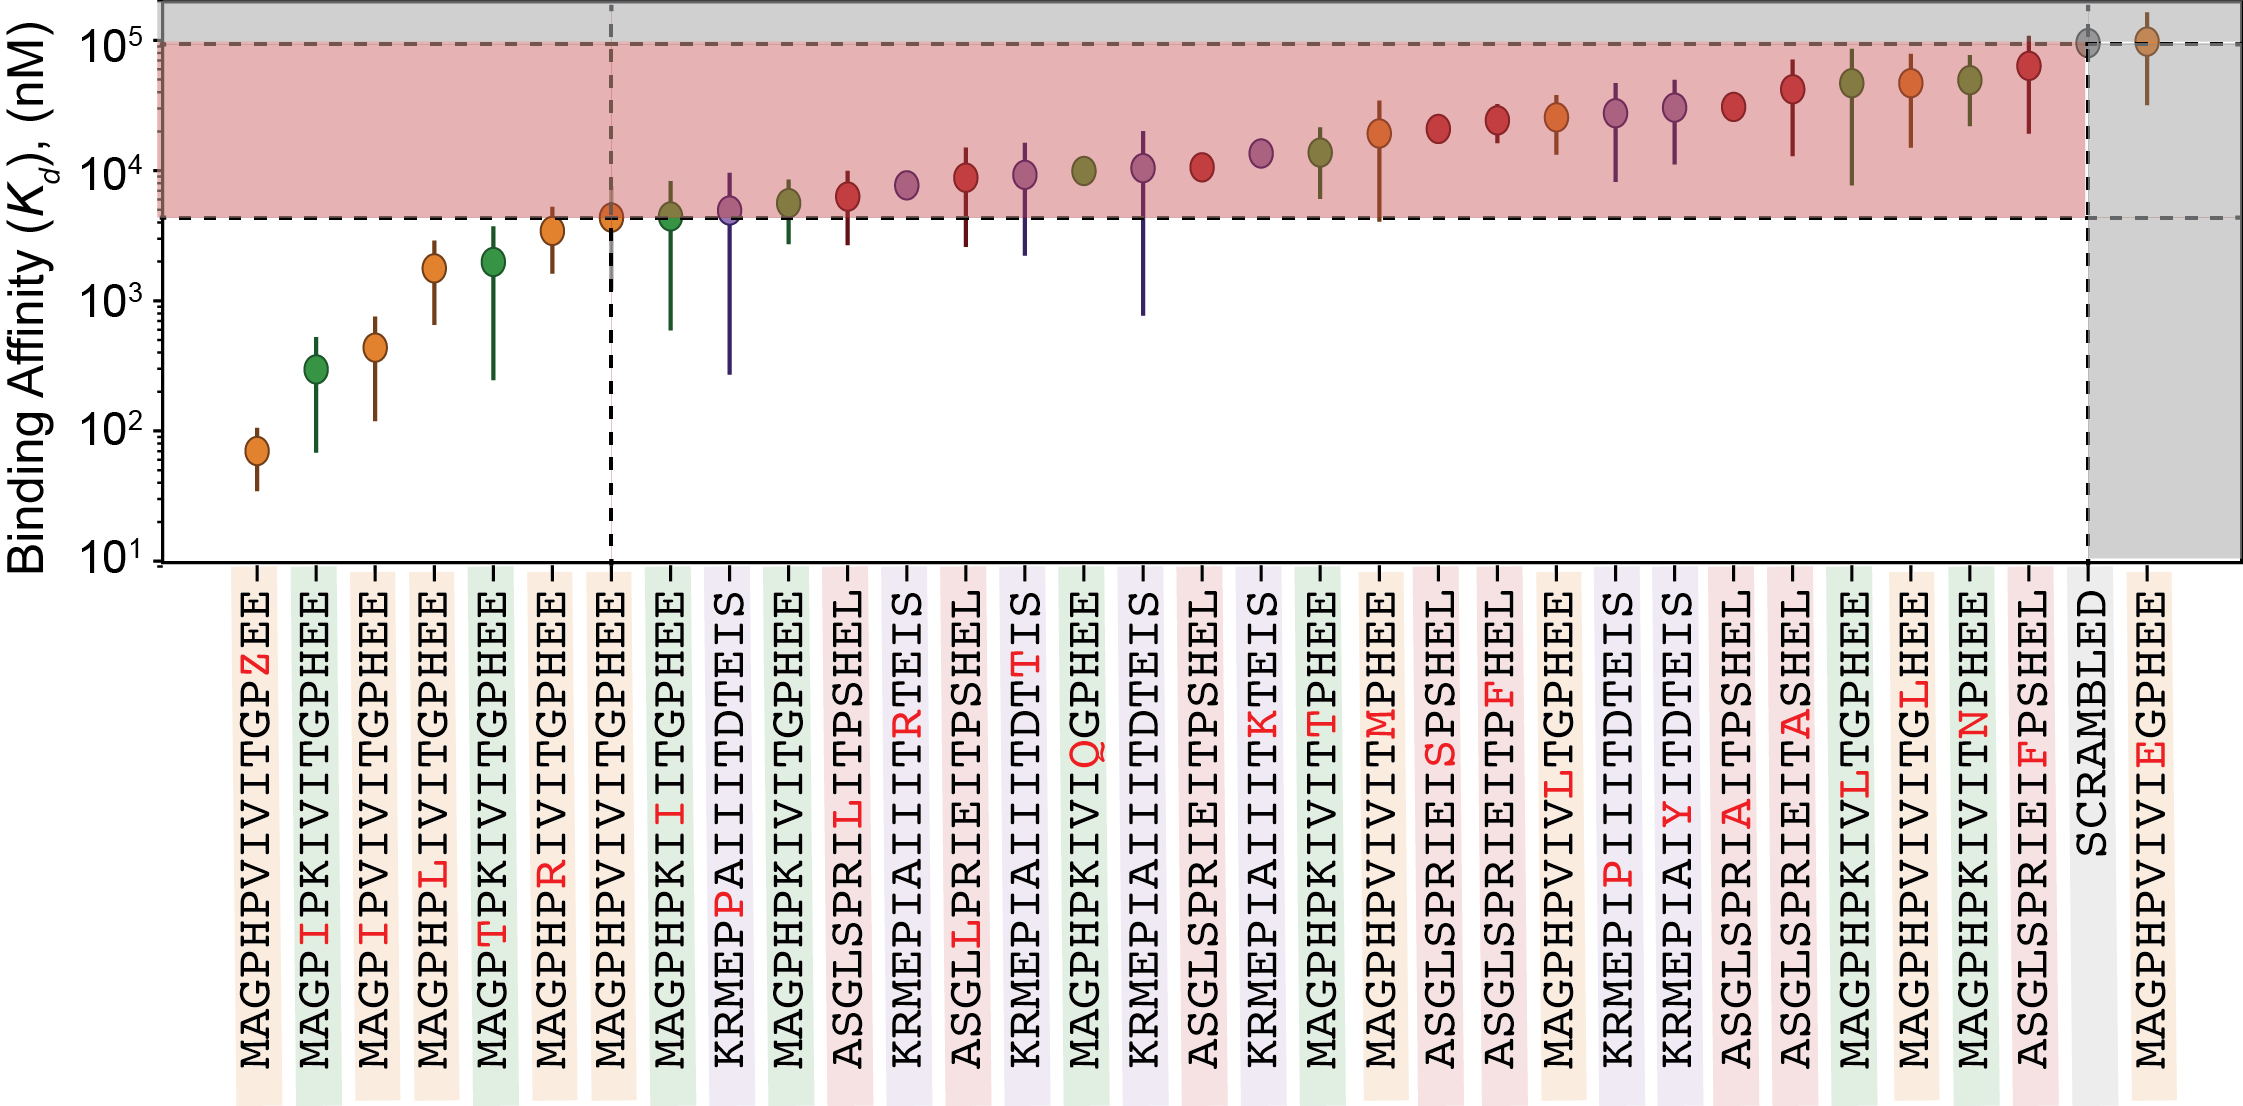

Supplement: supp [file elife-40499-supp-v1.zip › elife_poa_e40499_Figure_5_figure_supplement_4.jpg]

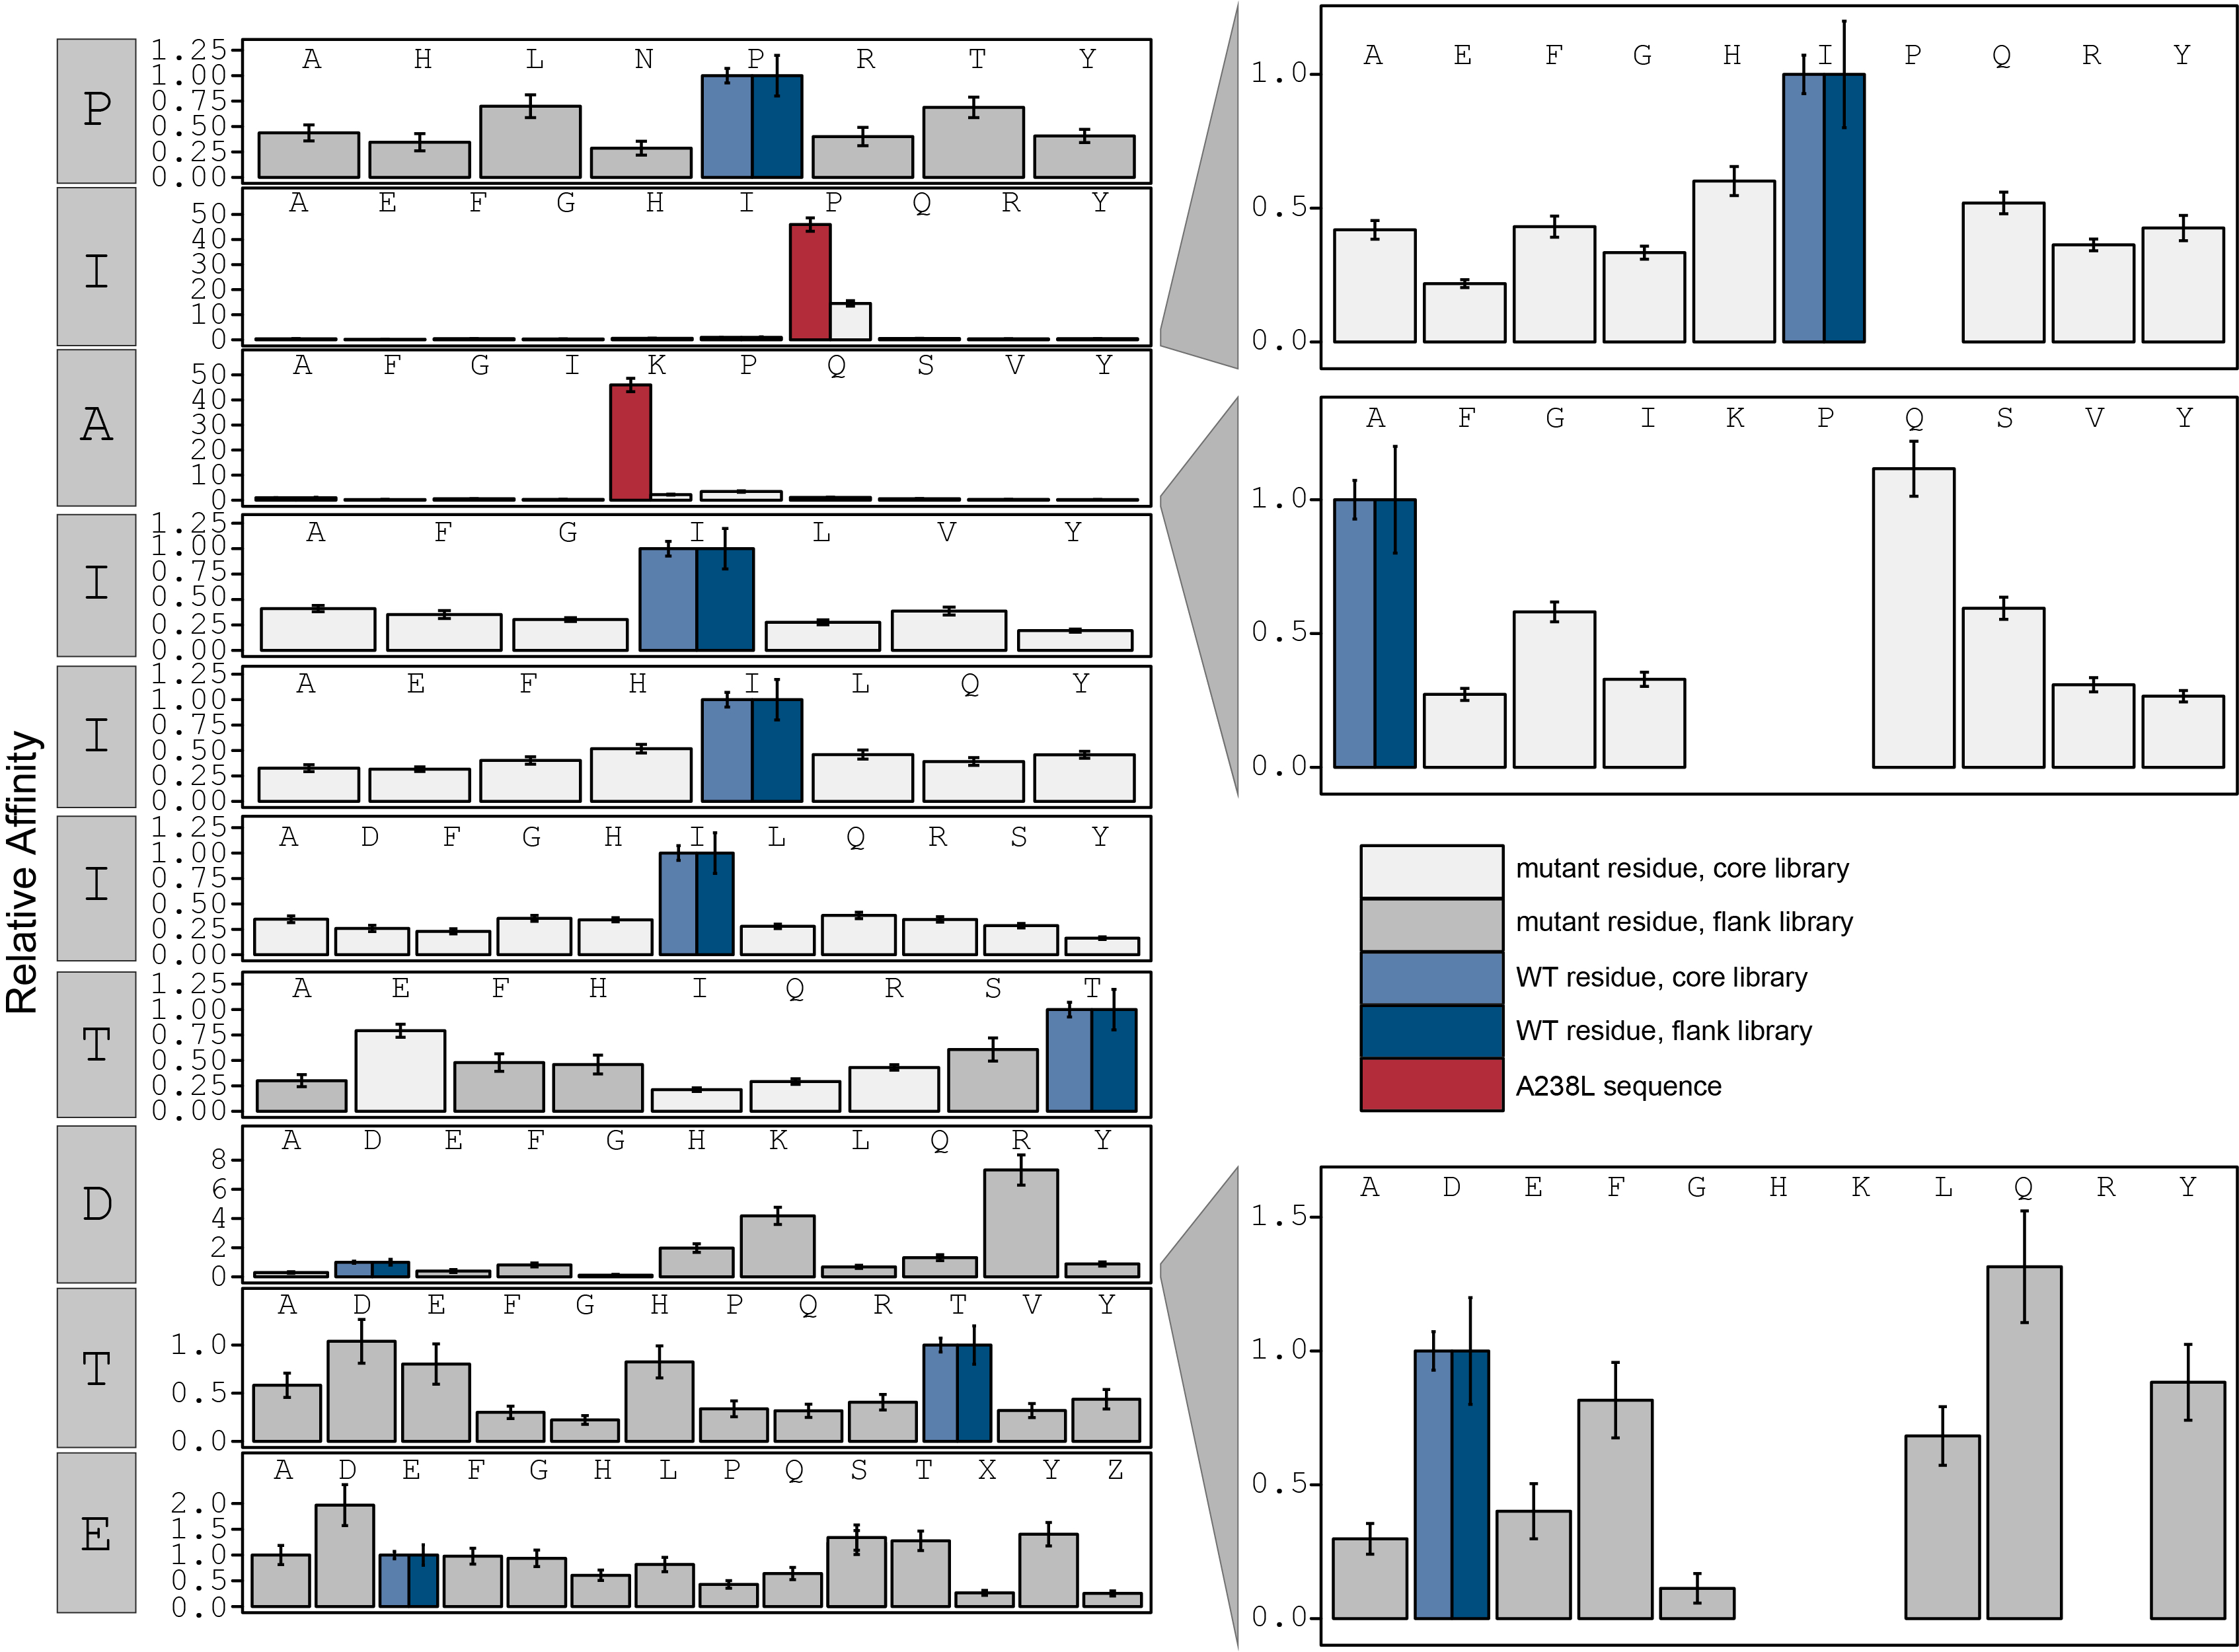

Supplement: supp [file elife-40499-supp-v1.zip › elife_poa_e40499_Figure_3_figure_supplement_19.jpg]

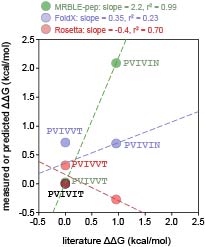

Supplement: supp [file elife-40499-supp-v1.zip › elife_poa_e40499_Figure_4_figure_supplement_7.jpg]

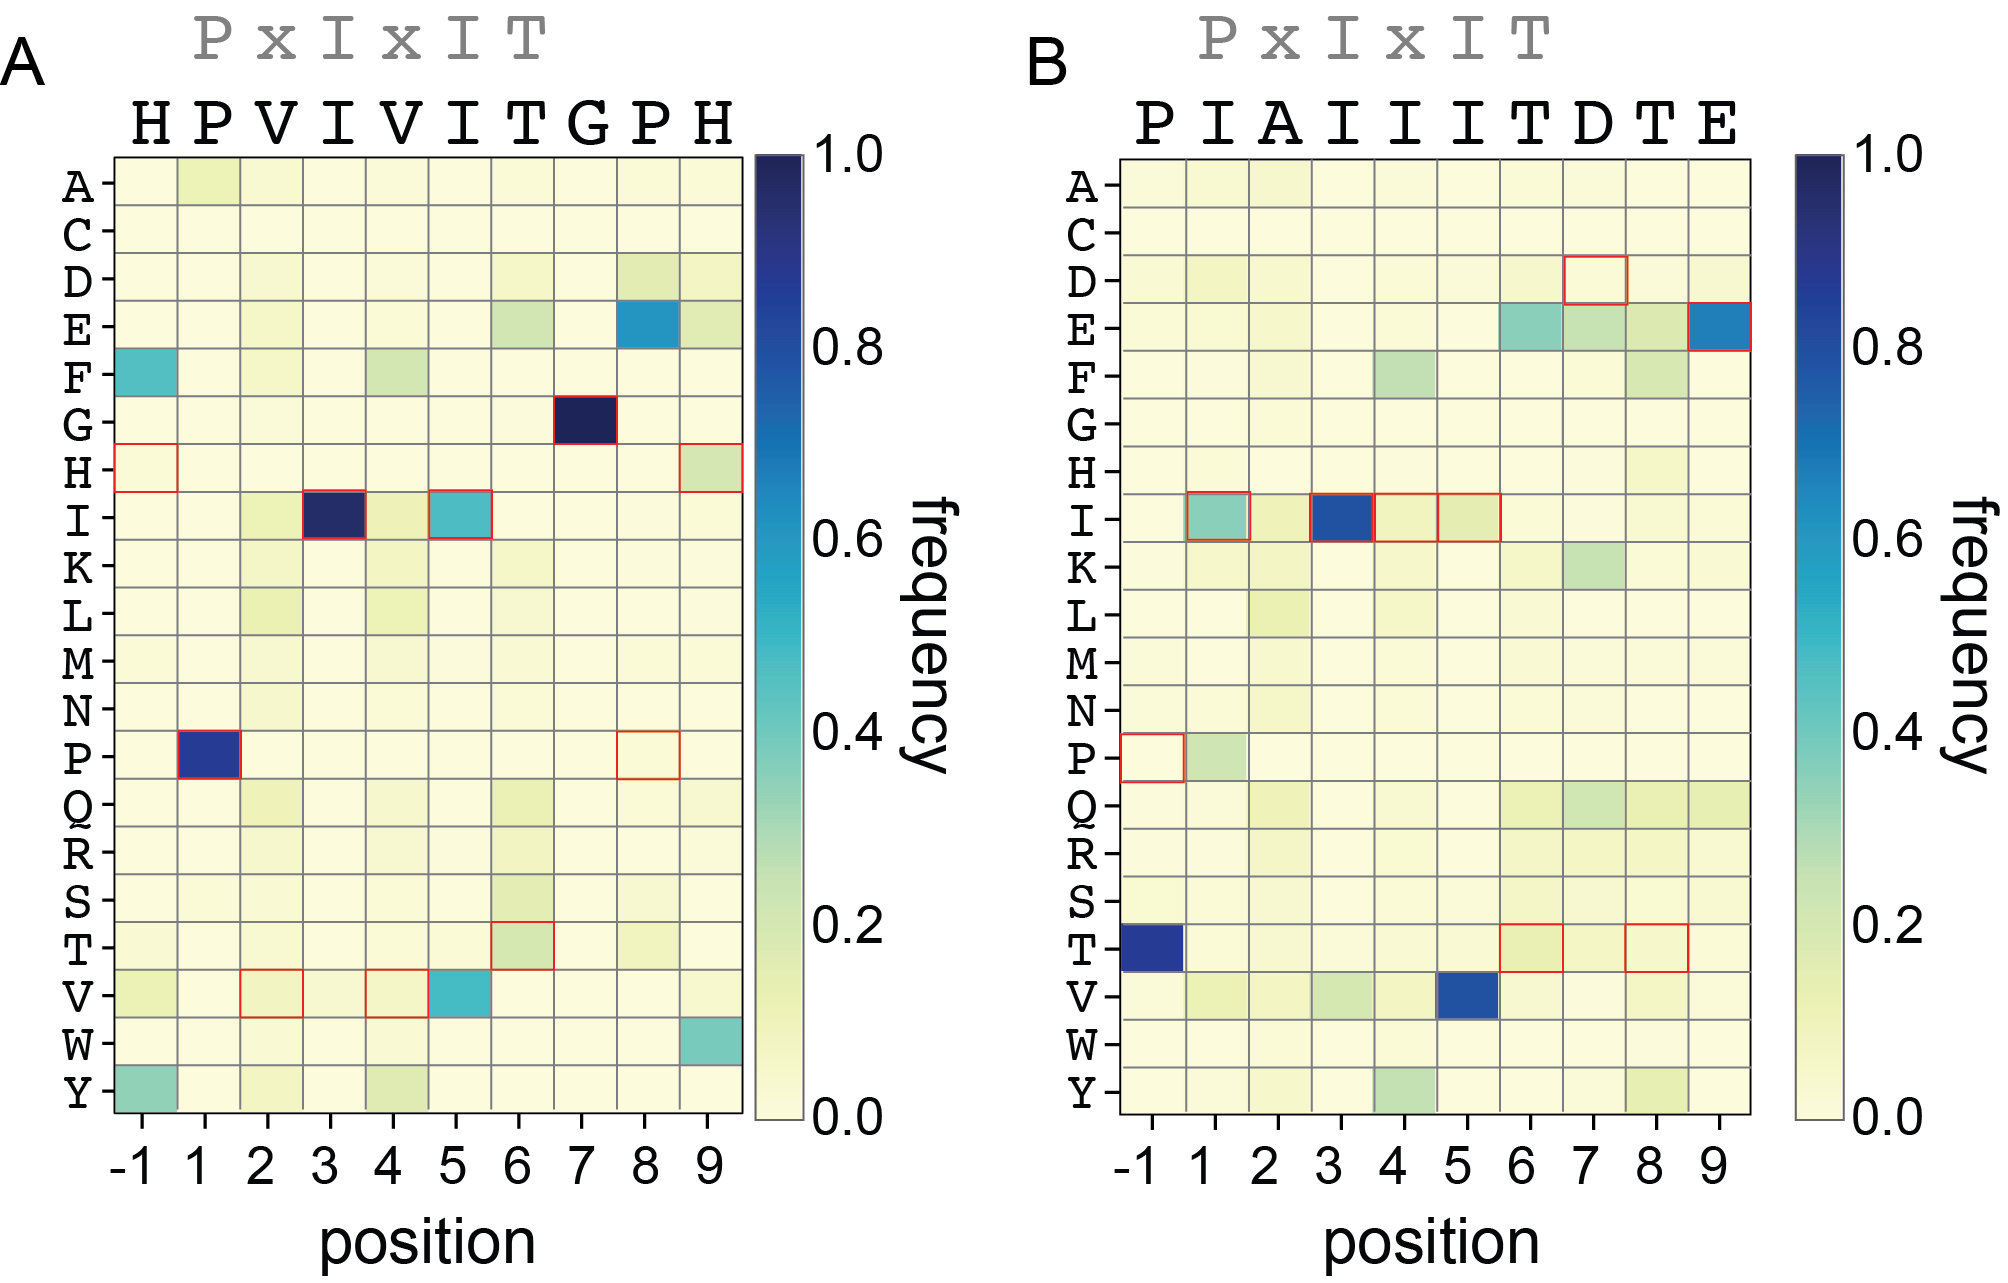

Supplement: supp [file elife-40499-supp-v1.zip › elife_poa_e40499_Figure_4_figure_supplement_1.jpg]

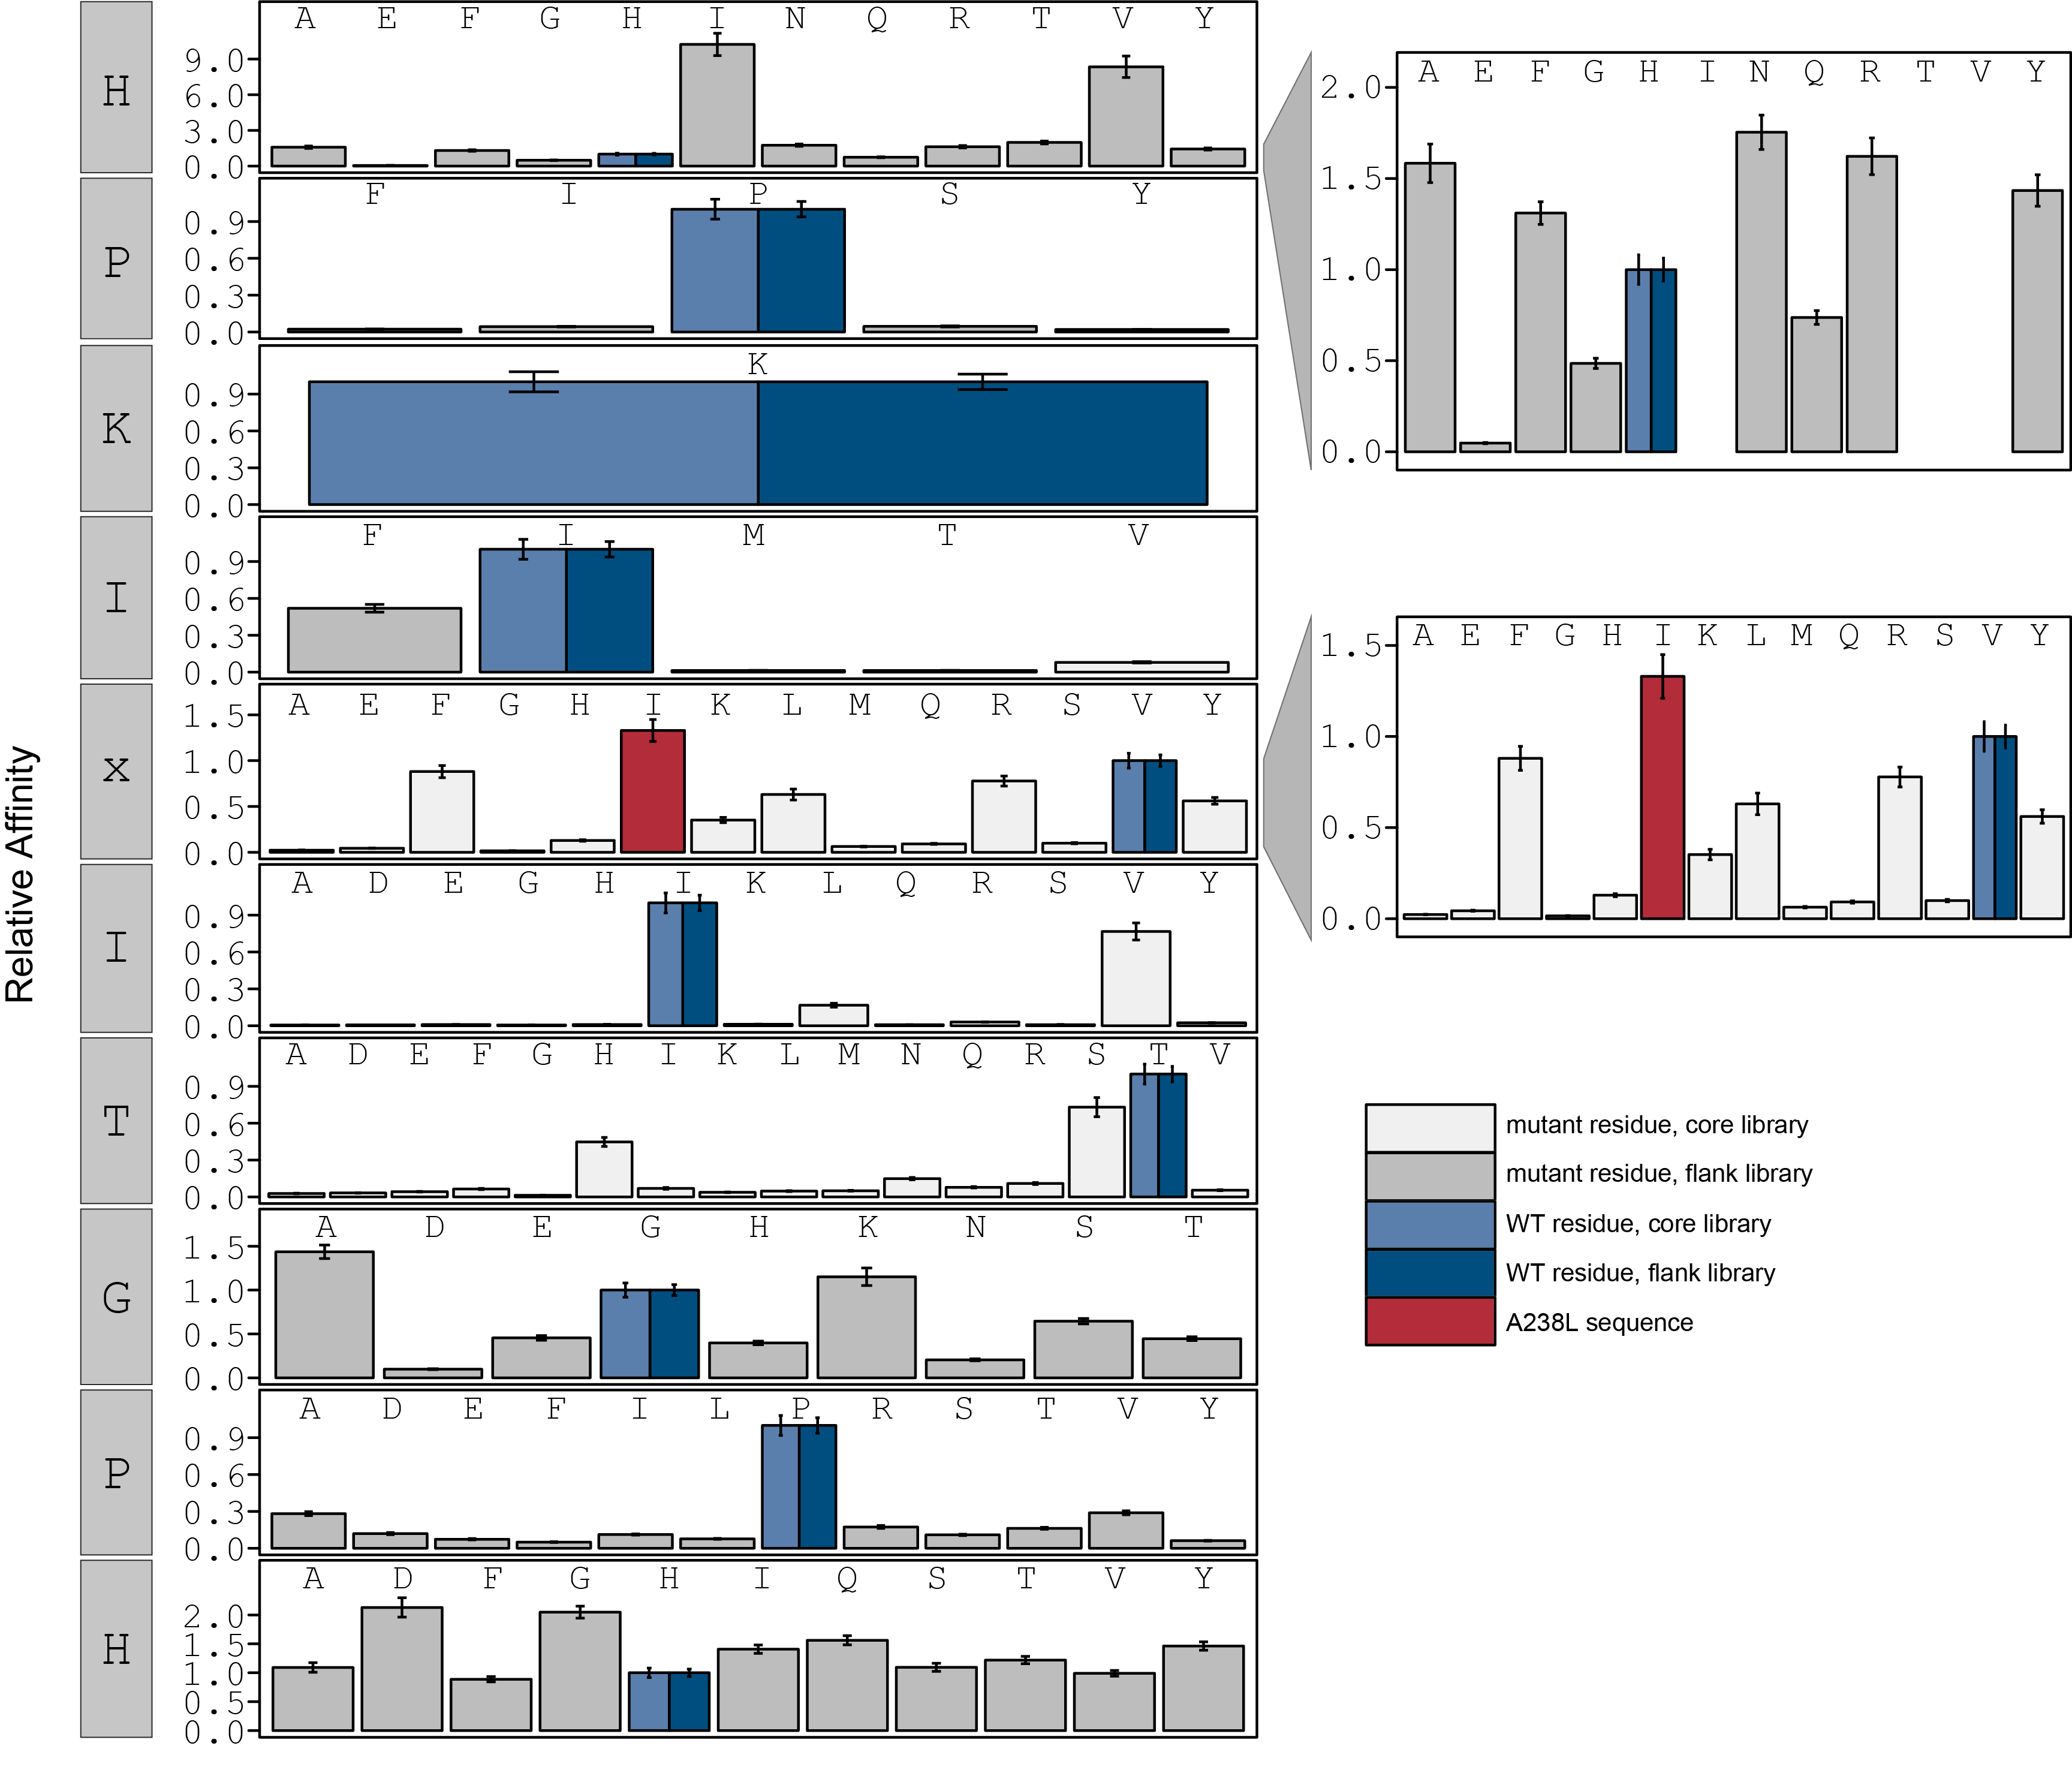

Supplement: supp [file elife-40499-supp-v1.zip › elife_poa_e40499_Figure_3_figure_supplement_15.jpg]

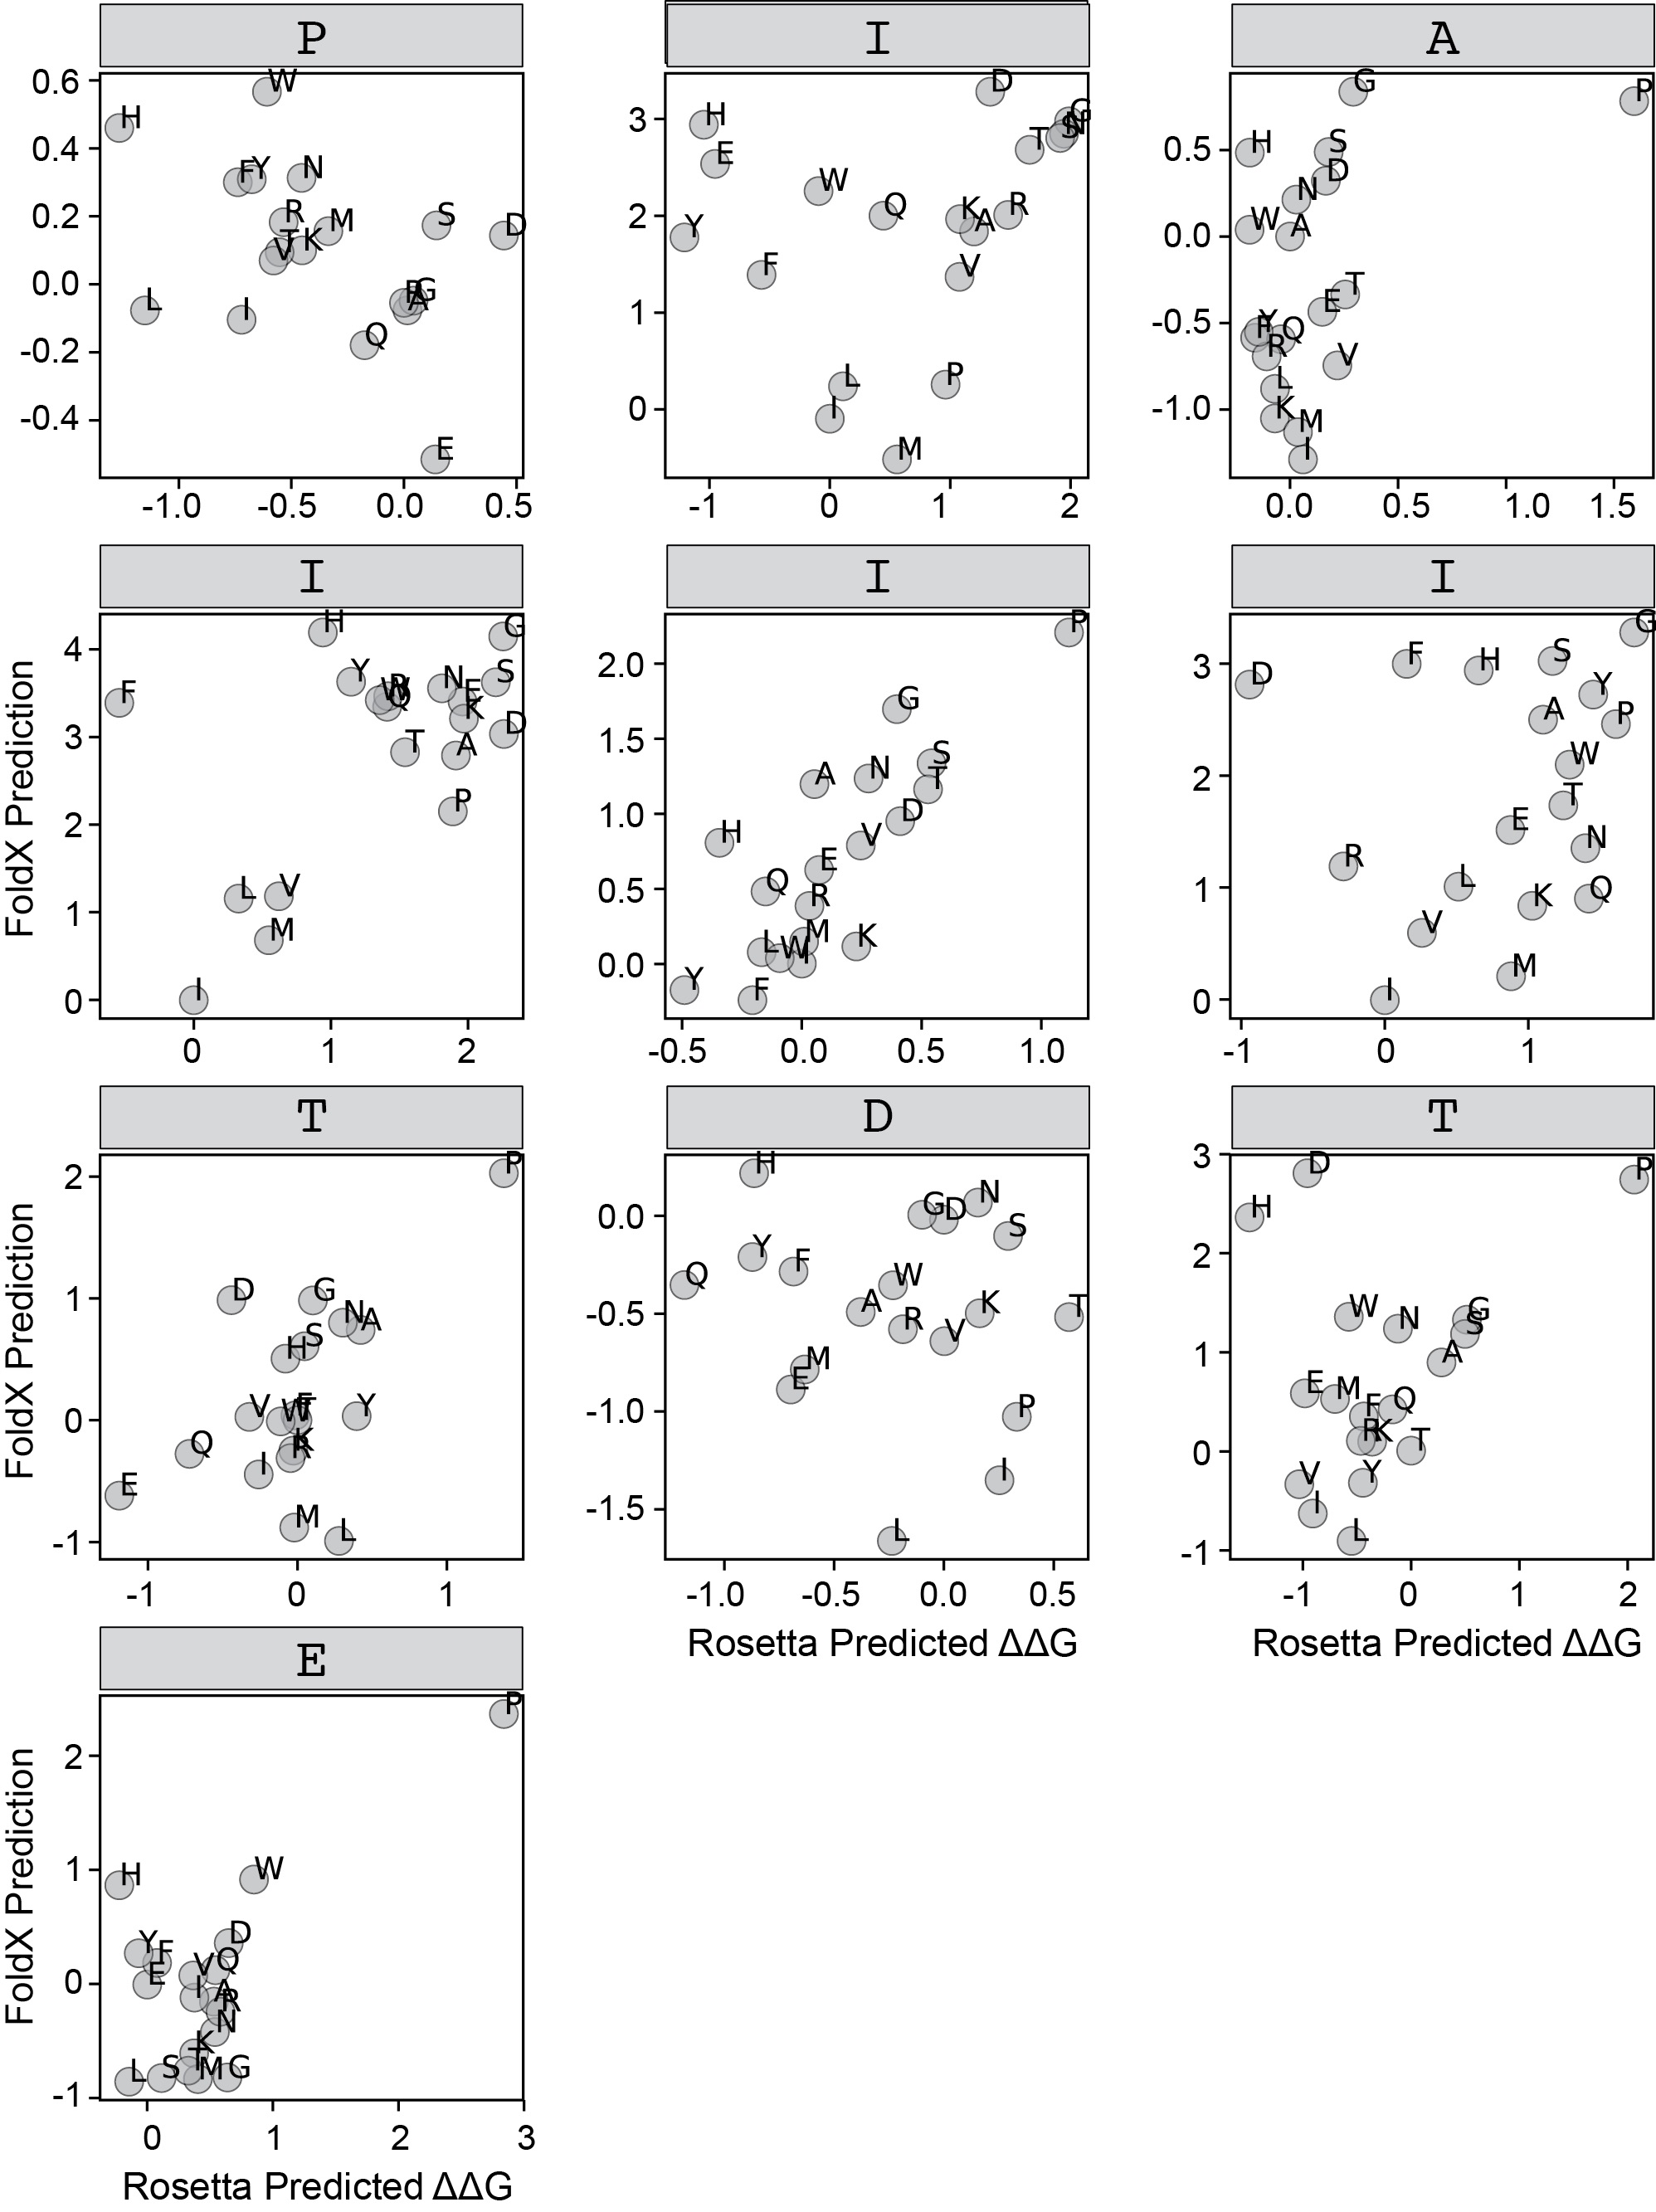

Supplement: supp [file elife-40499-supp-v1.zip › elife_poa_e40499_Figure_4_figure_supplement_3.jpg]

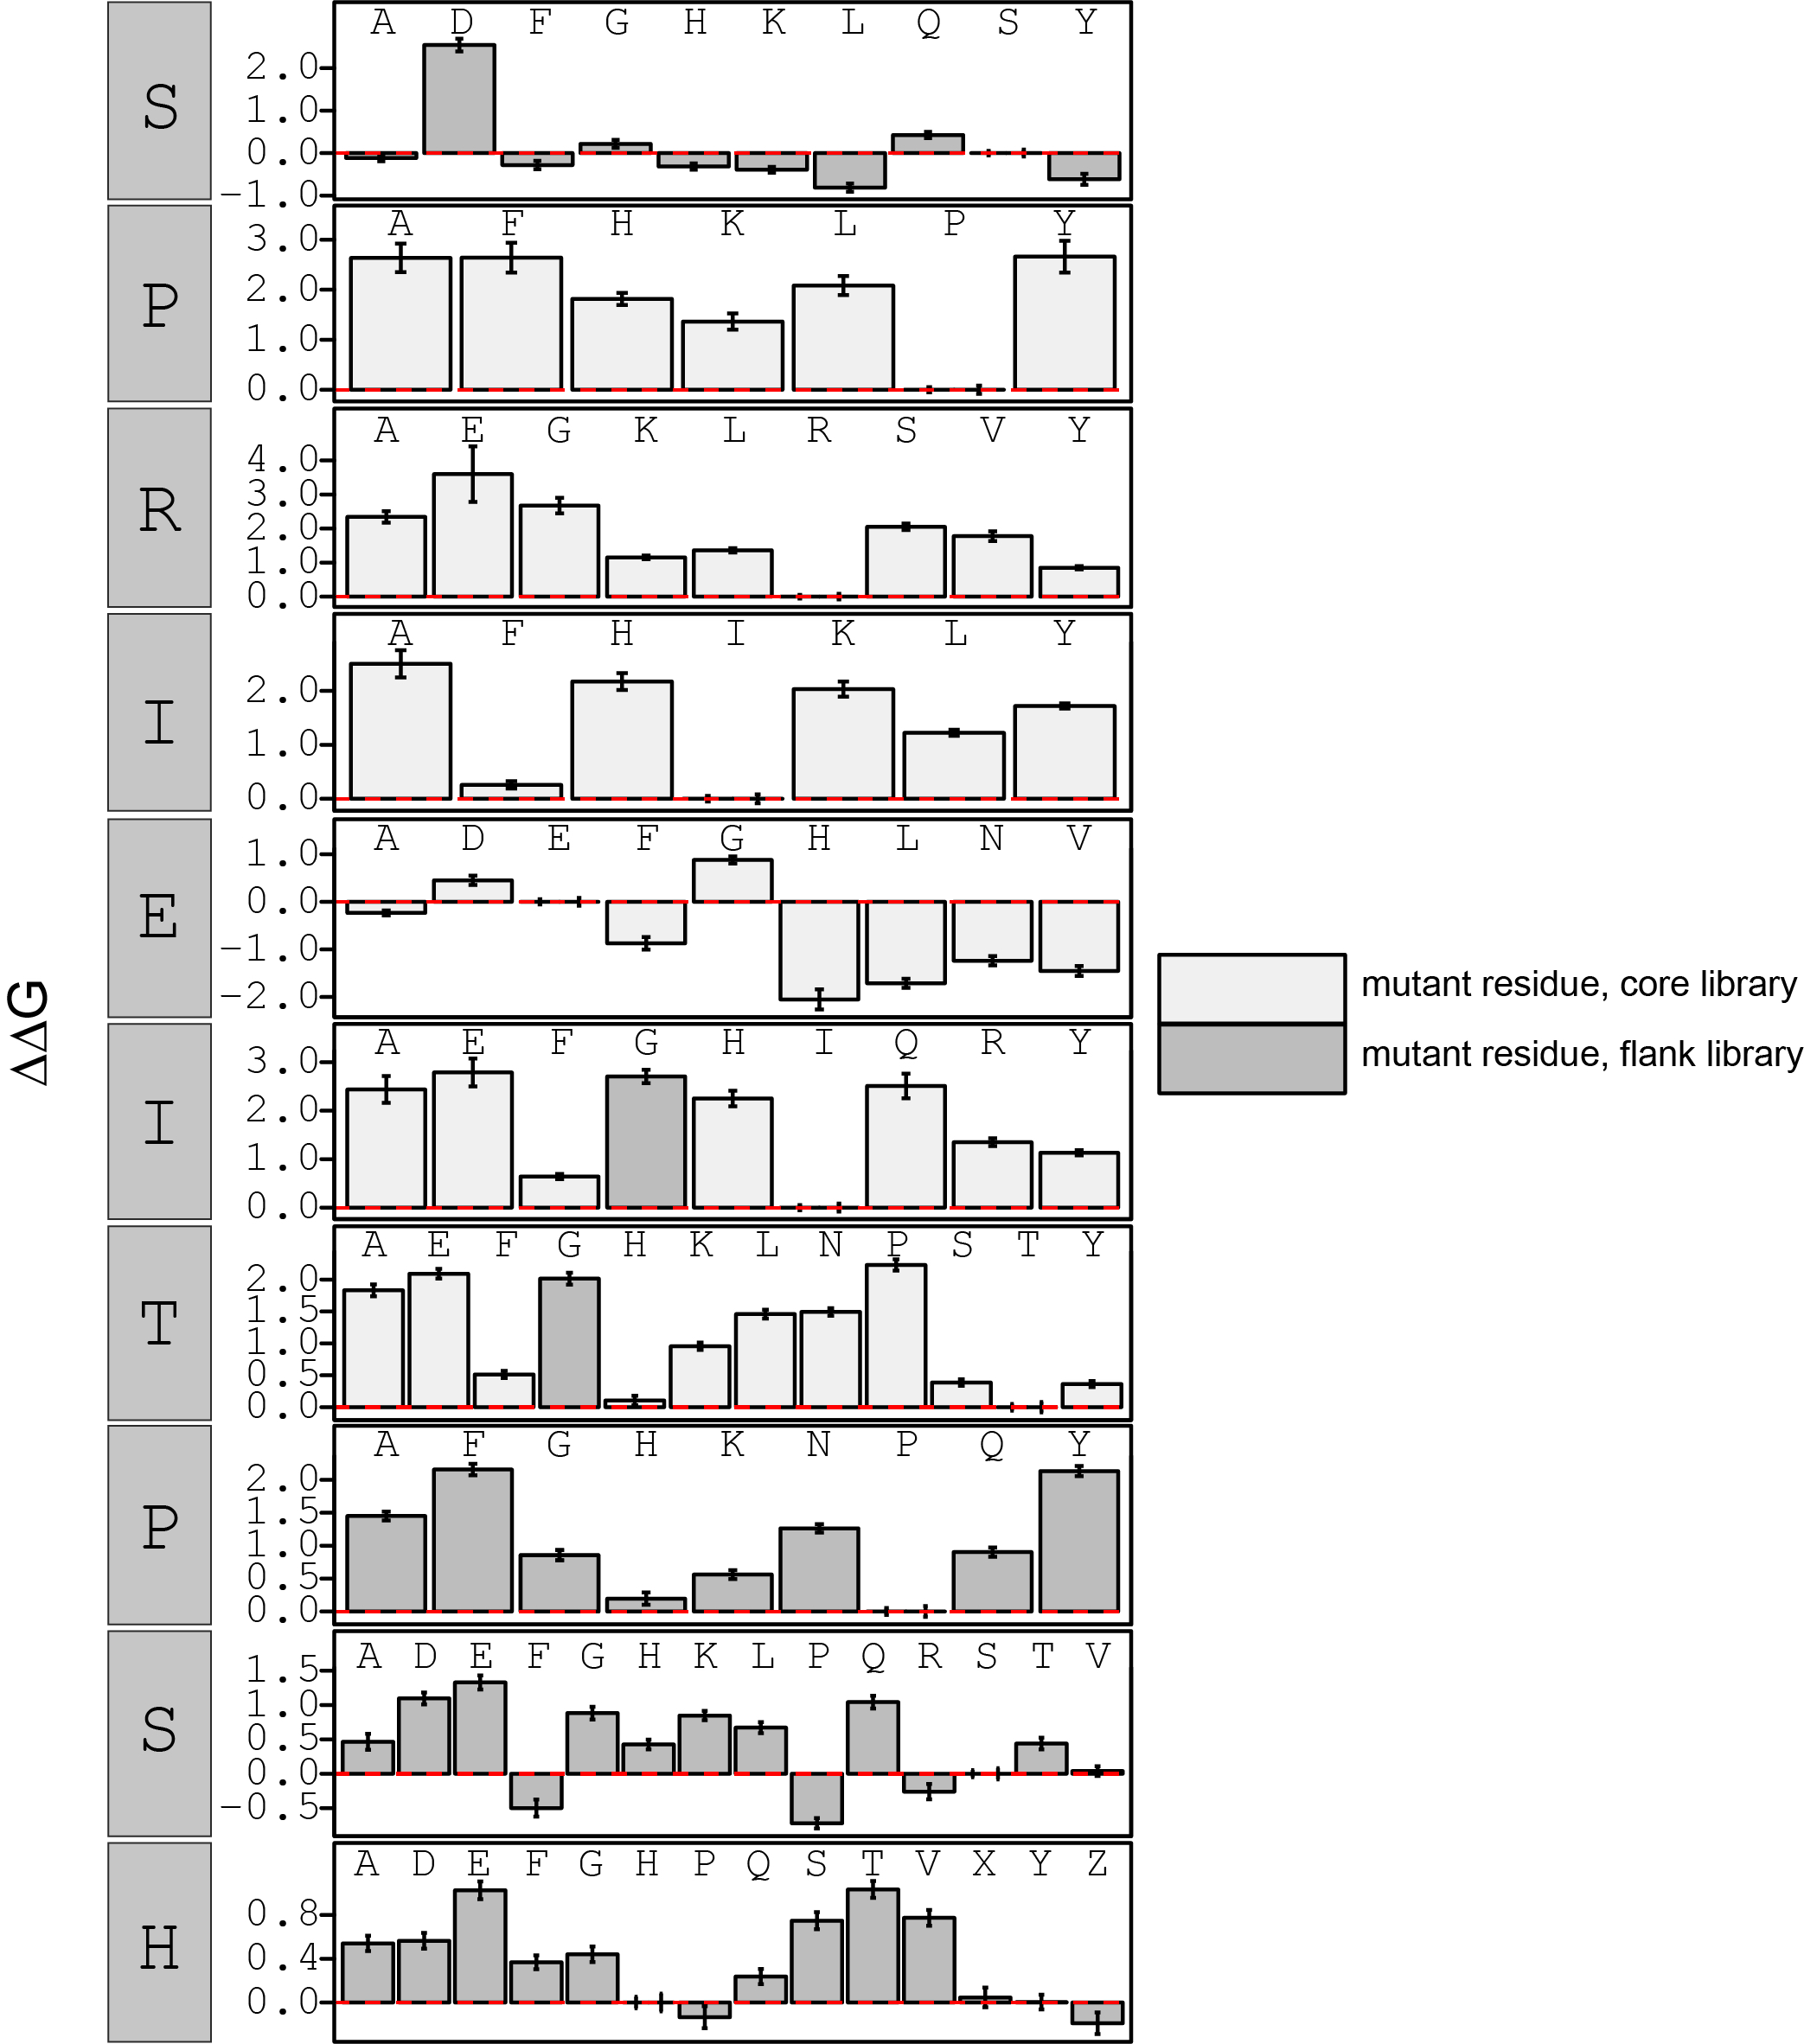

Supplement: supp [file elife-40499-supp-v1.zip › elife_poa_e40499_Figure_3_figure_supplement_18.jpg]

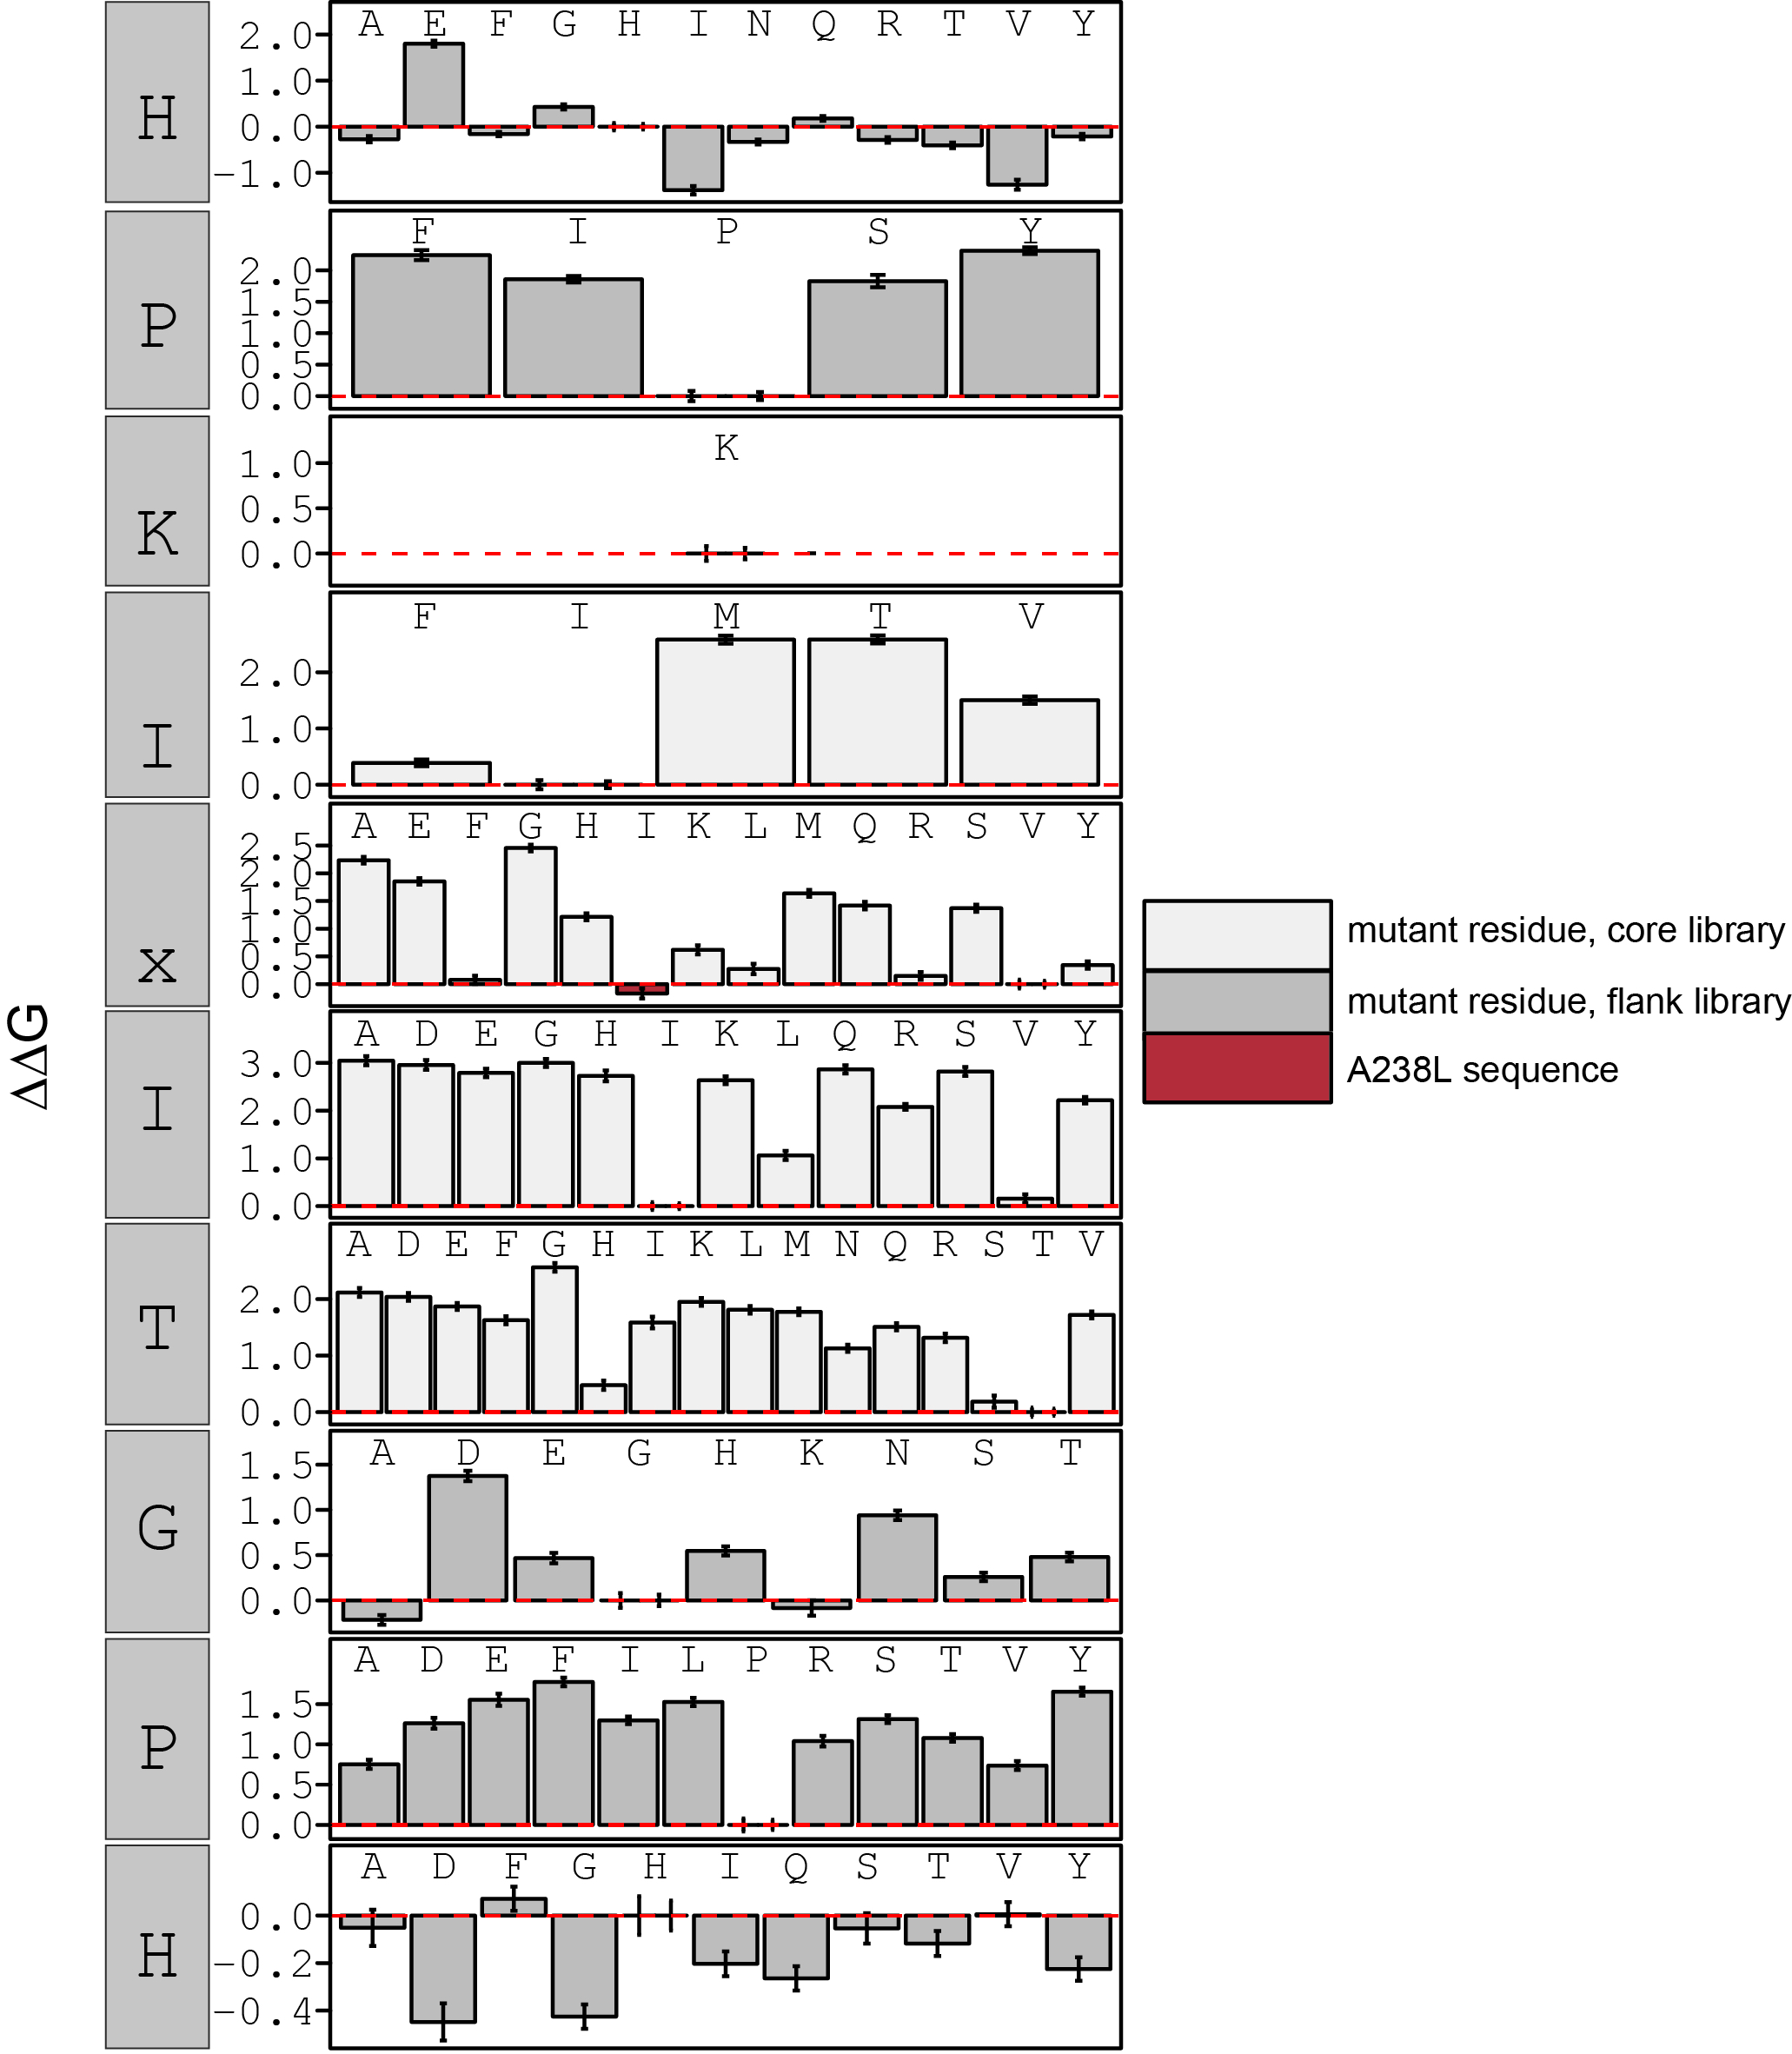

Supplement: supp [file elife-40499-supp-v1.zip › elife_poa_e40499_Figure_3_figure_supplement_16.jpg]

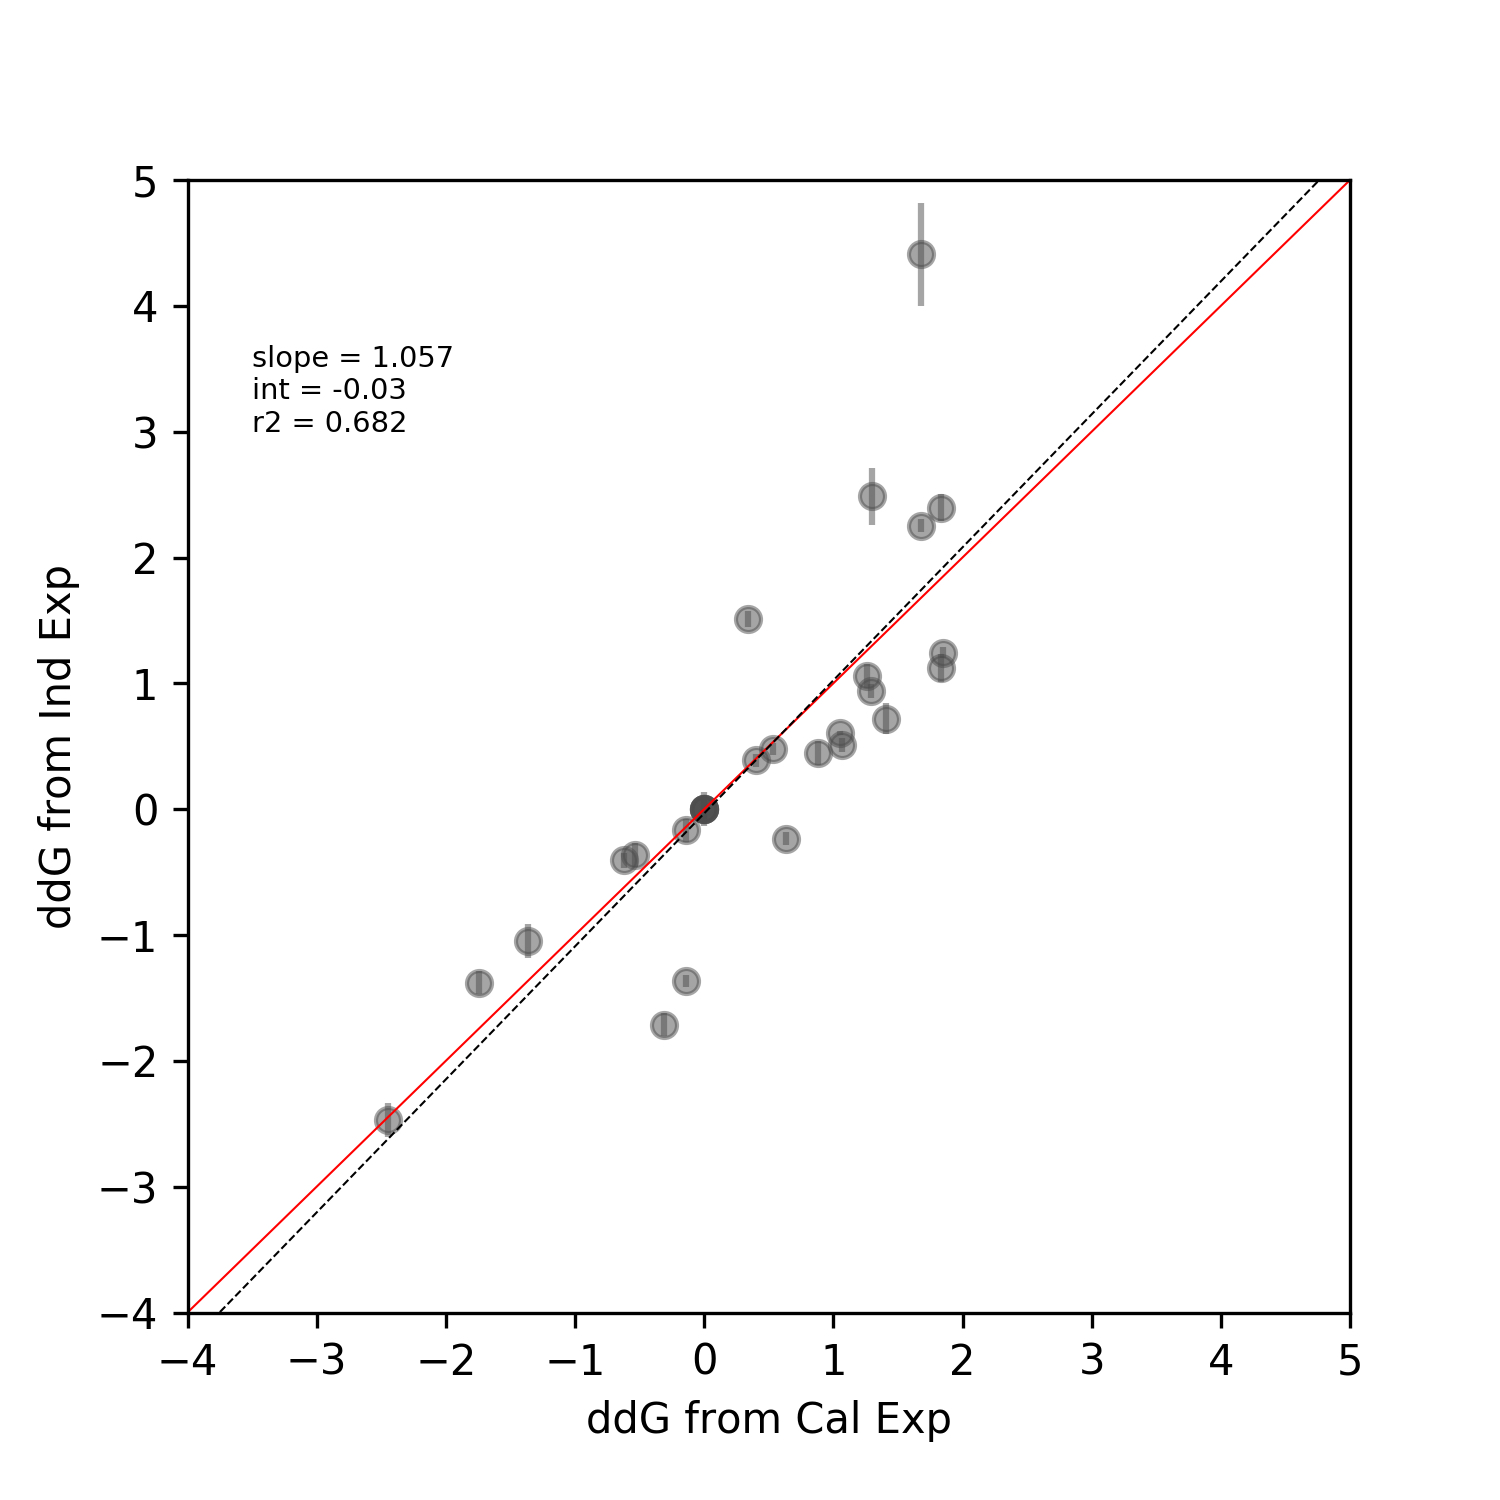

Supplement: supp [file elife-40499-supp-v1.zip › elife_poa_e40499_Figure_5_figure_supplement_7.jpg]

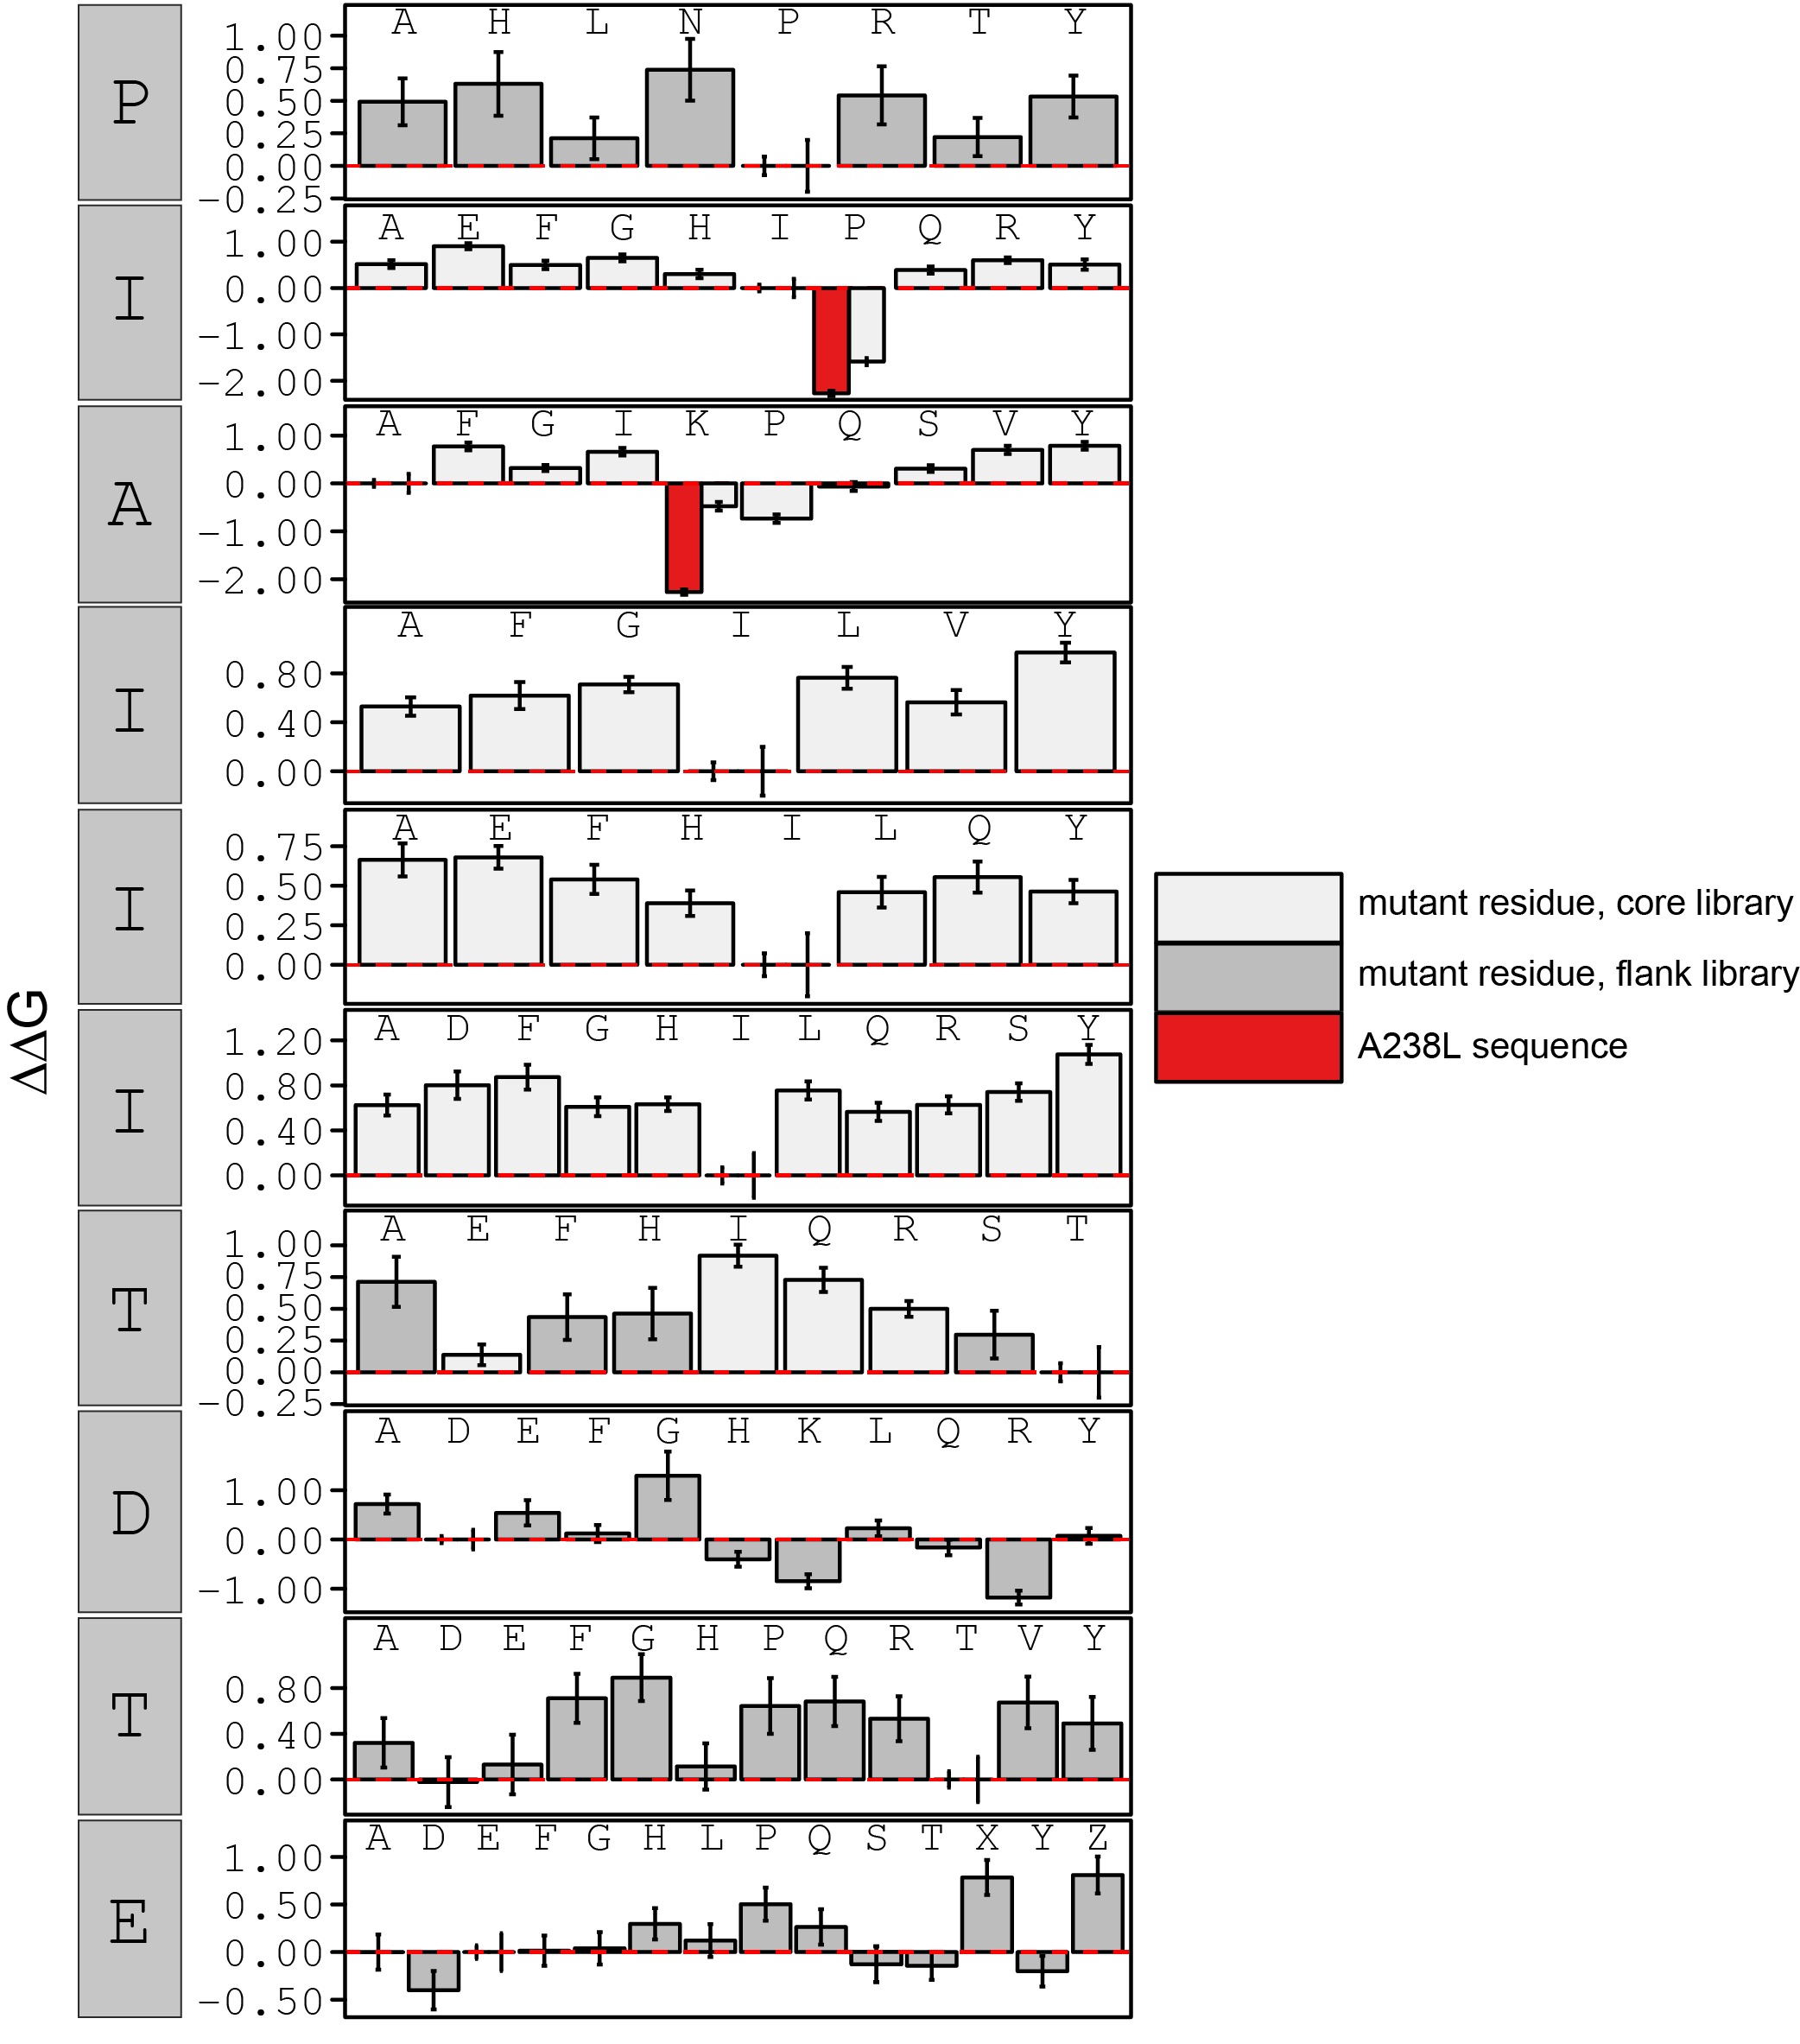

Supplement: supp [file elife-40499-supp-v1.zip › elife_poa_e40499_Figure_3_figure_supplement_20.jpg]

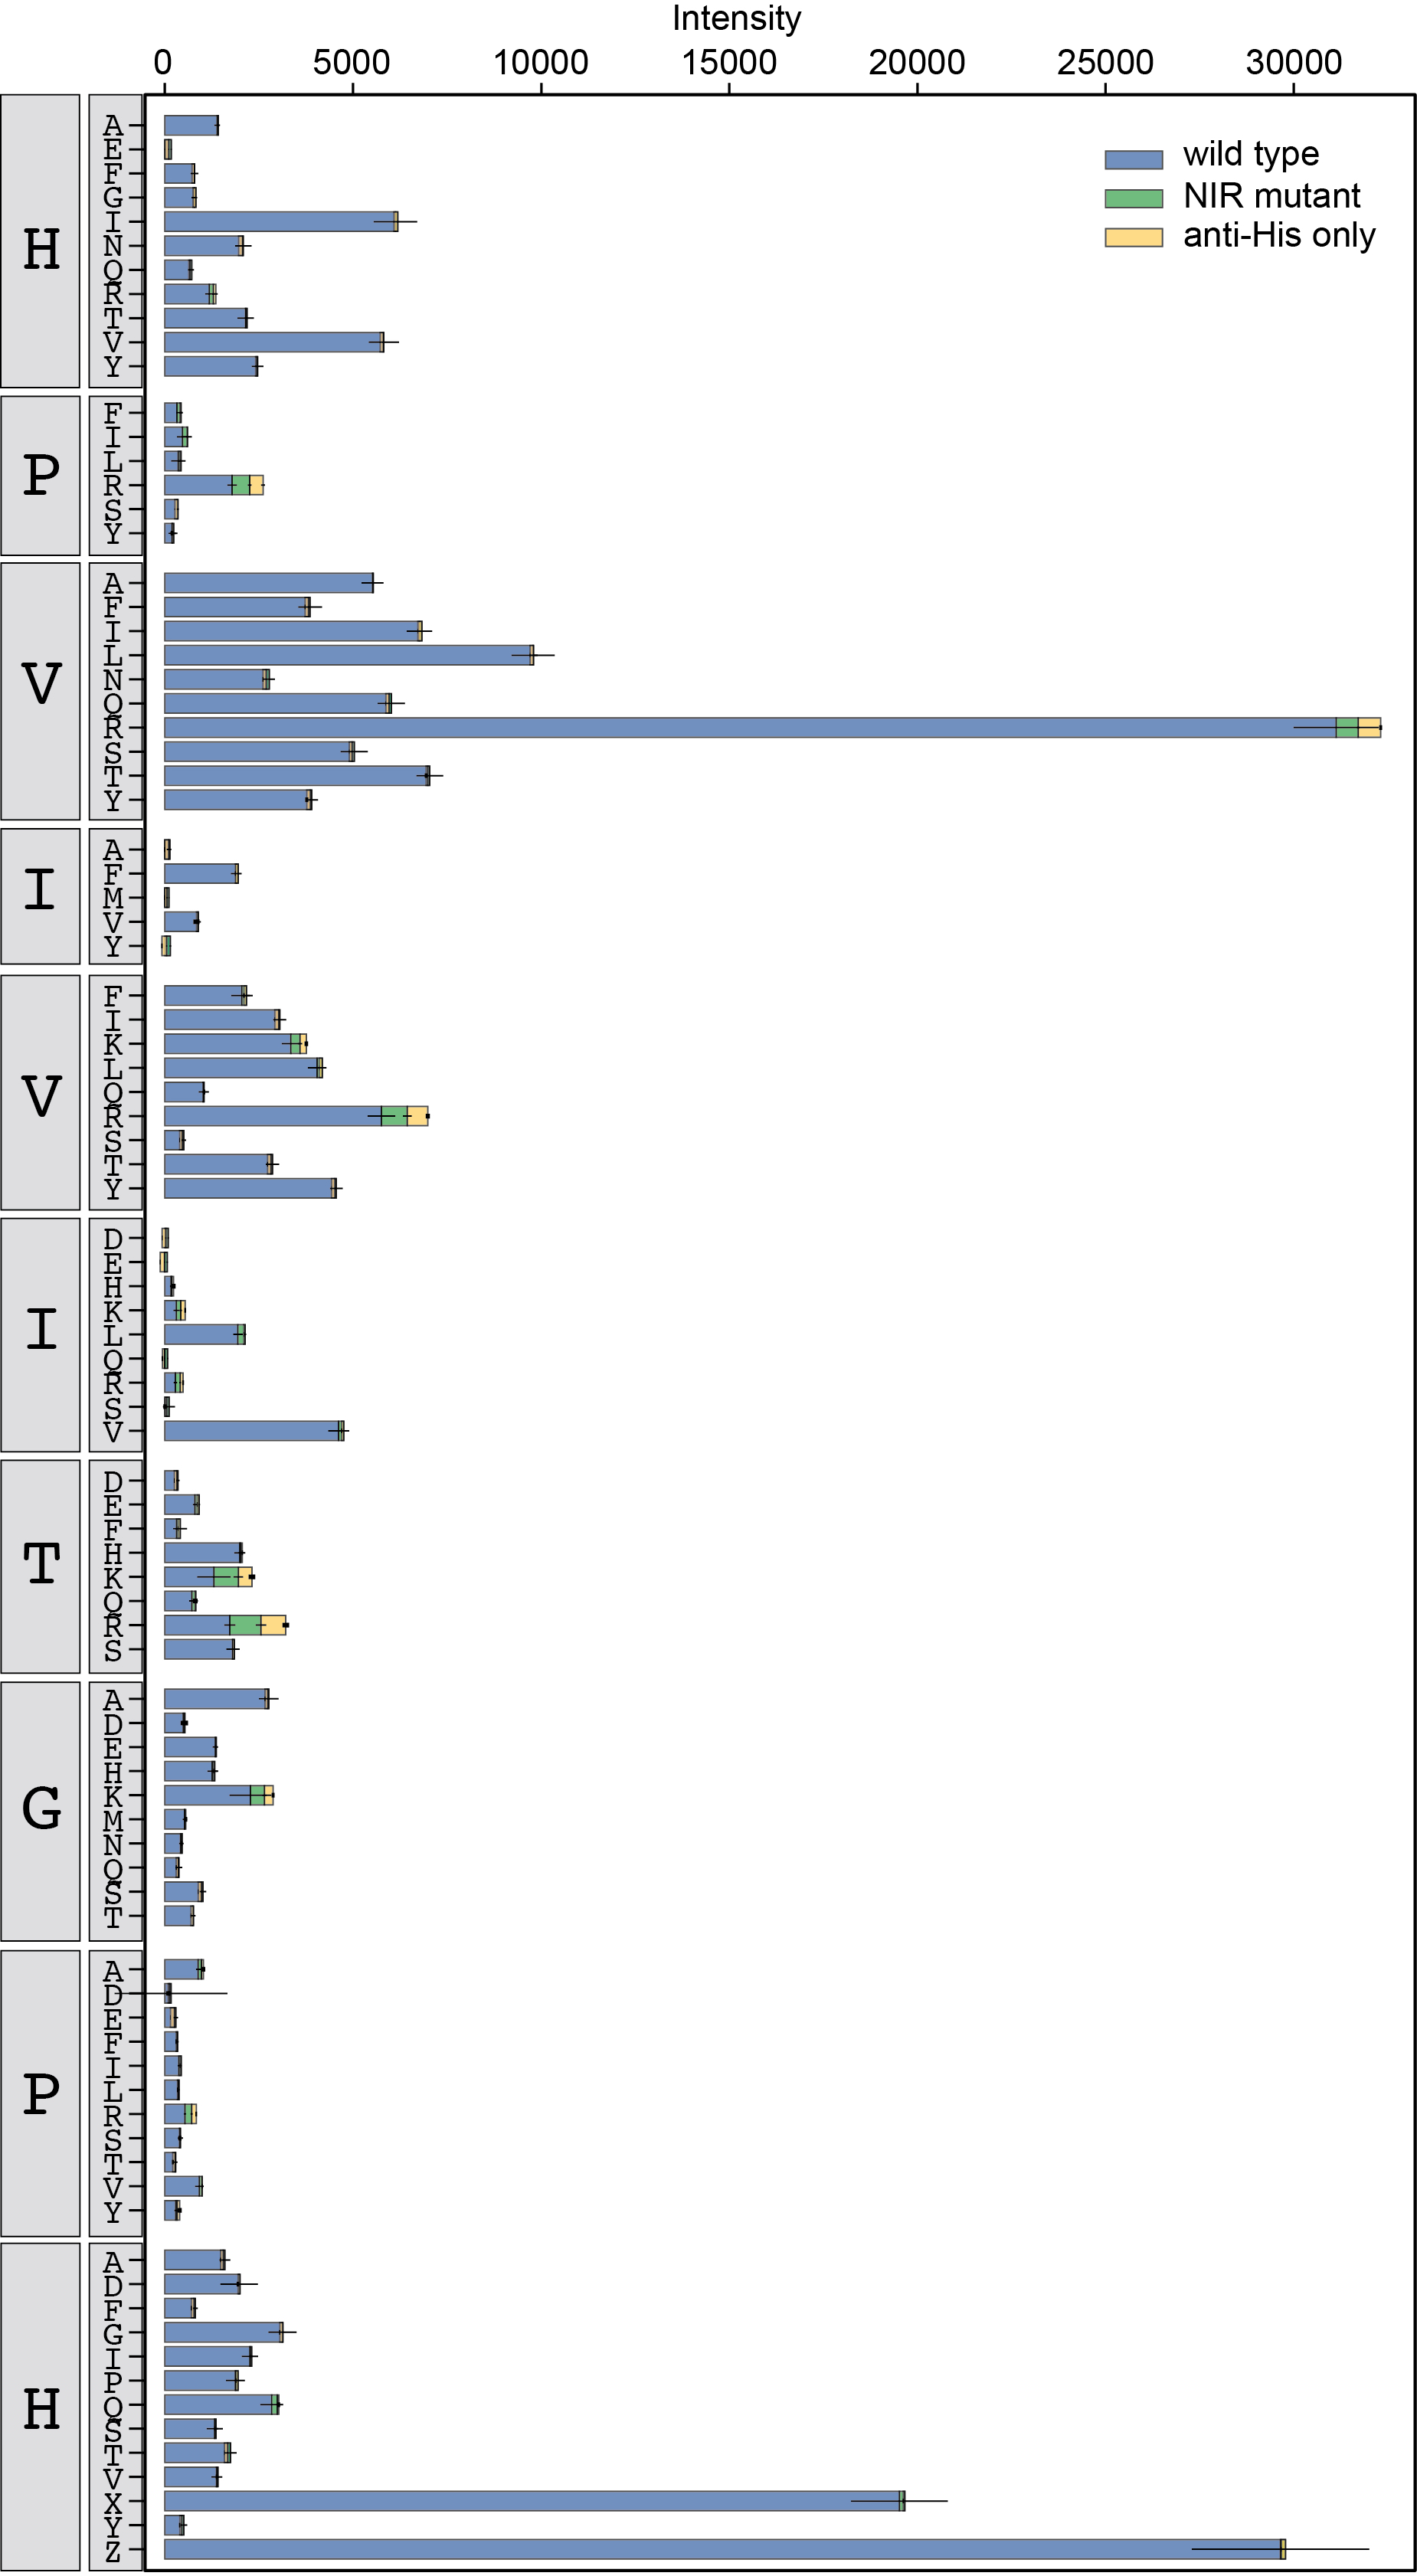

Supplement: supp [file elife-40499-supp-v1.zip › elife_poa_e40499_Figure_3_figure_supplement_9.jpg]

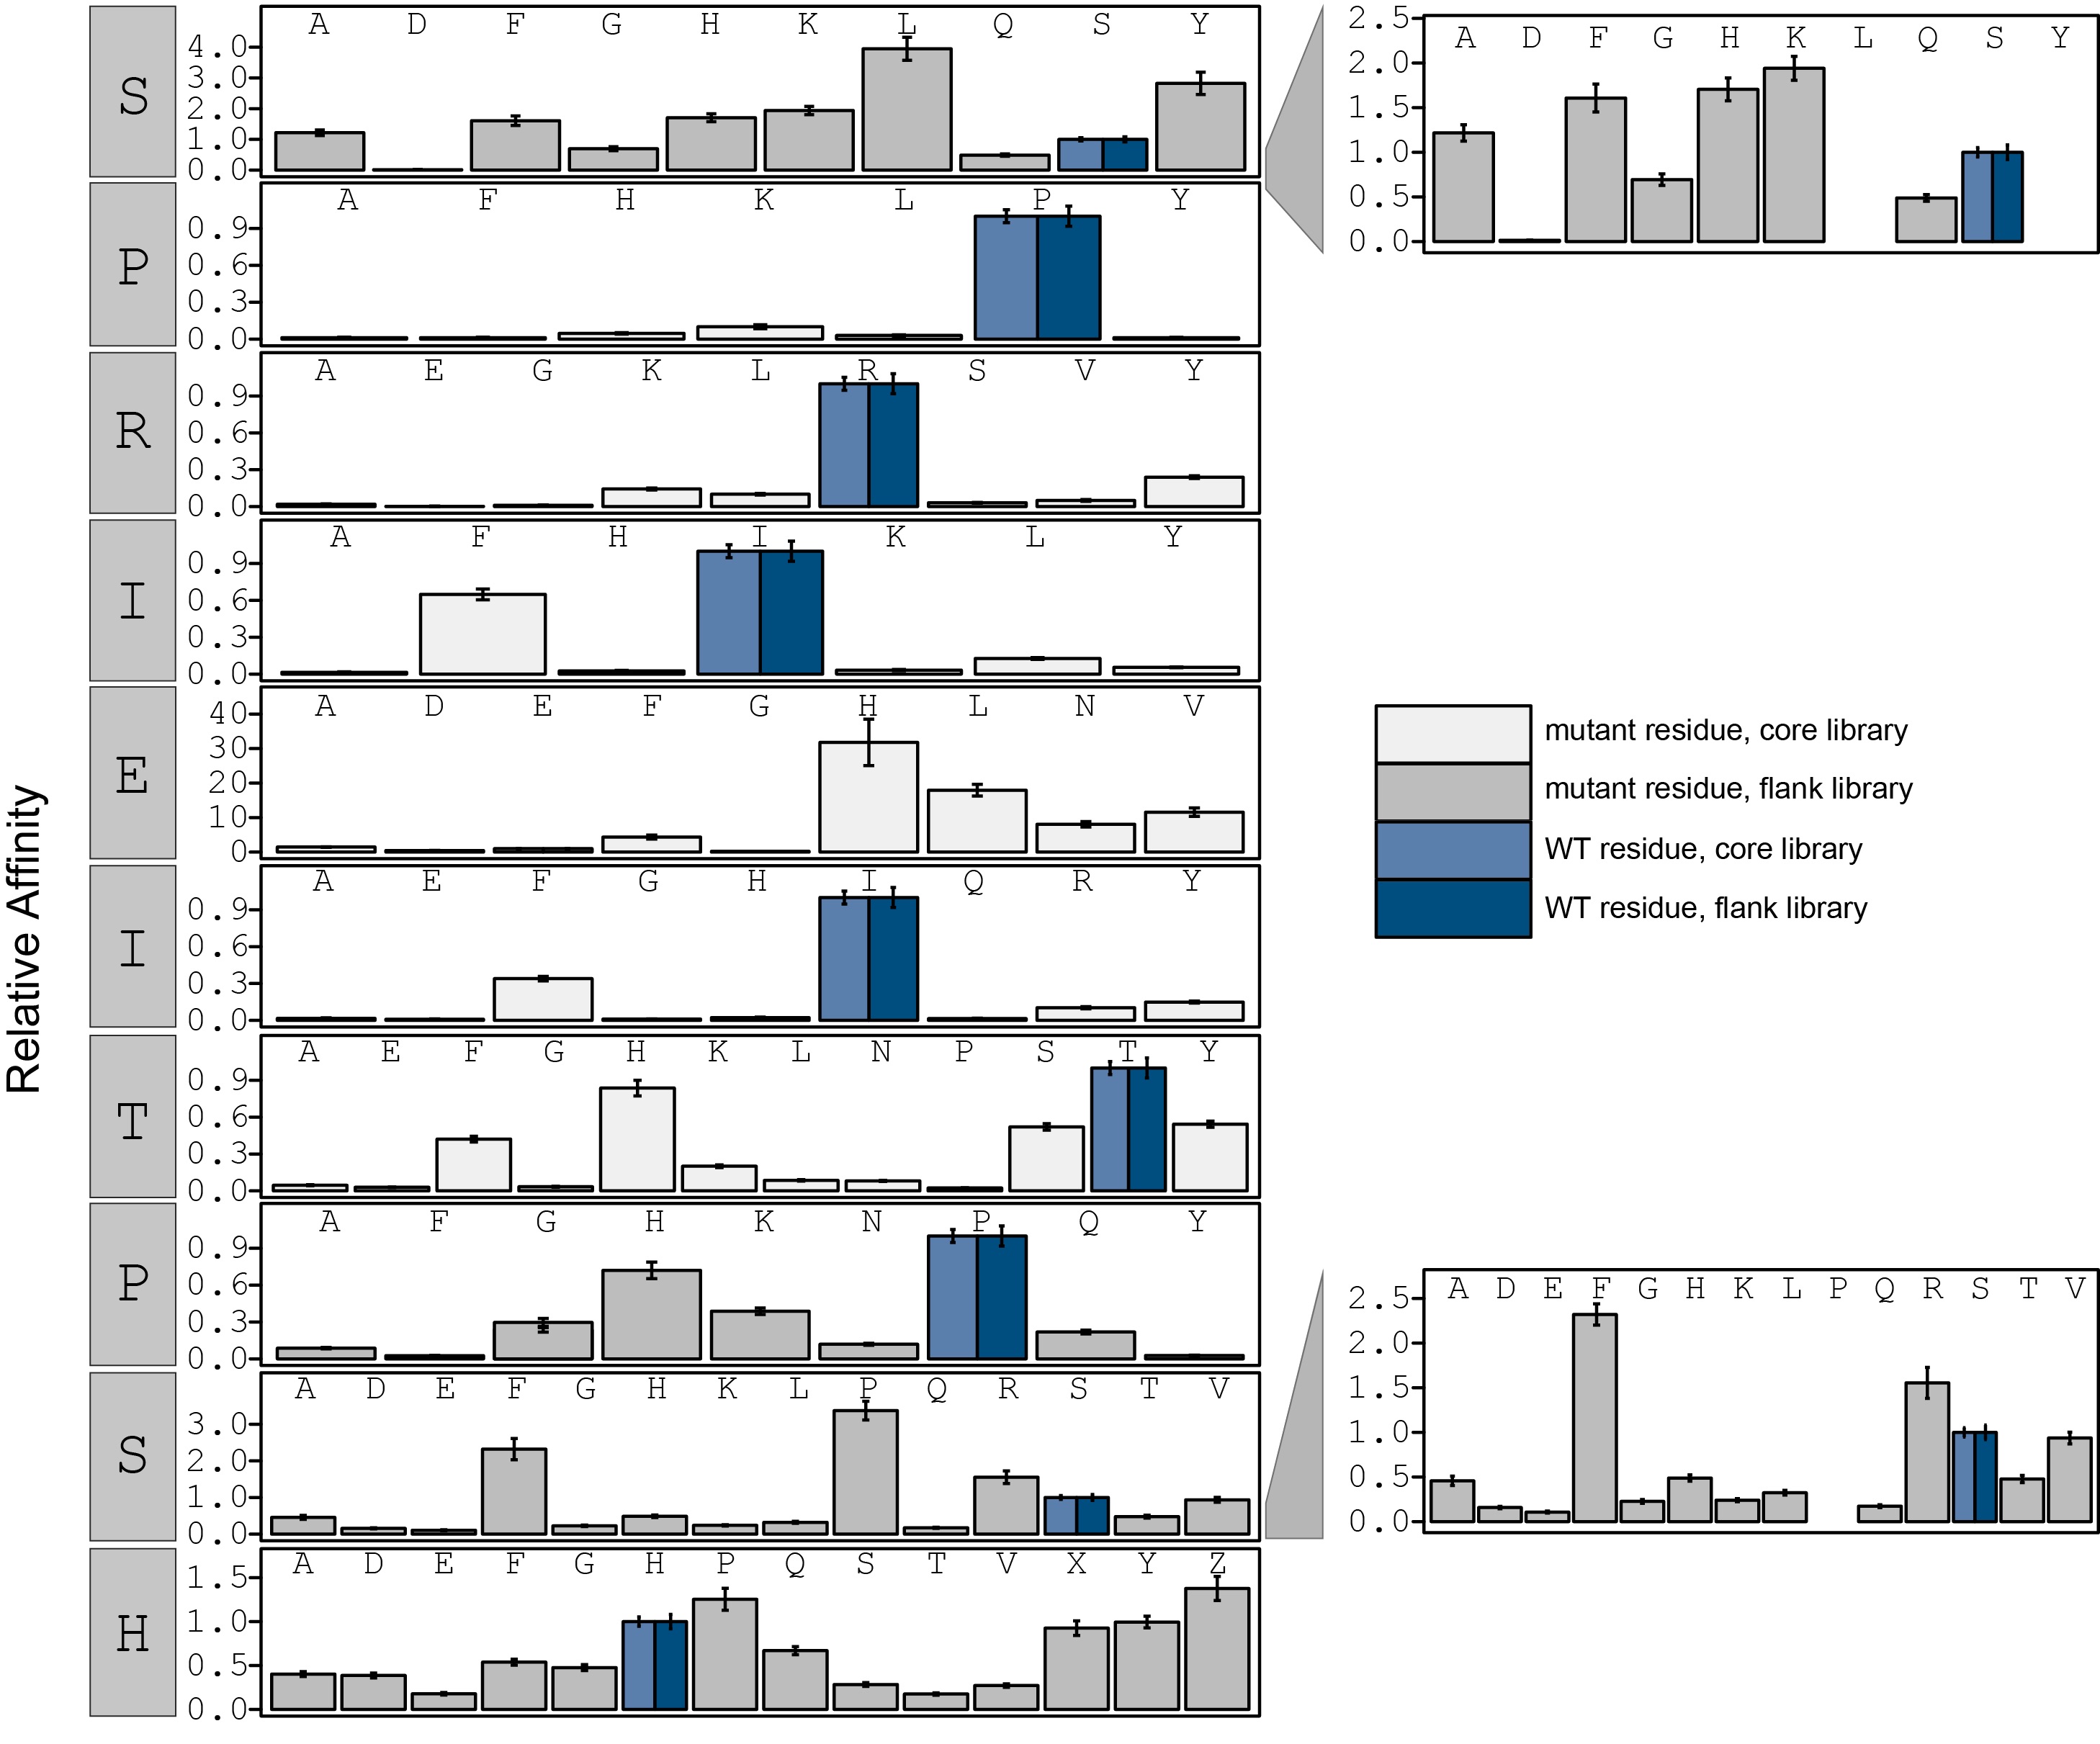

Supplement: supp [file elife-40499-supp-v1.zip › elife_poa_e40499_Figure_3_figure_supplement_17.jpg]

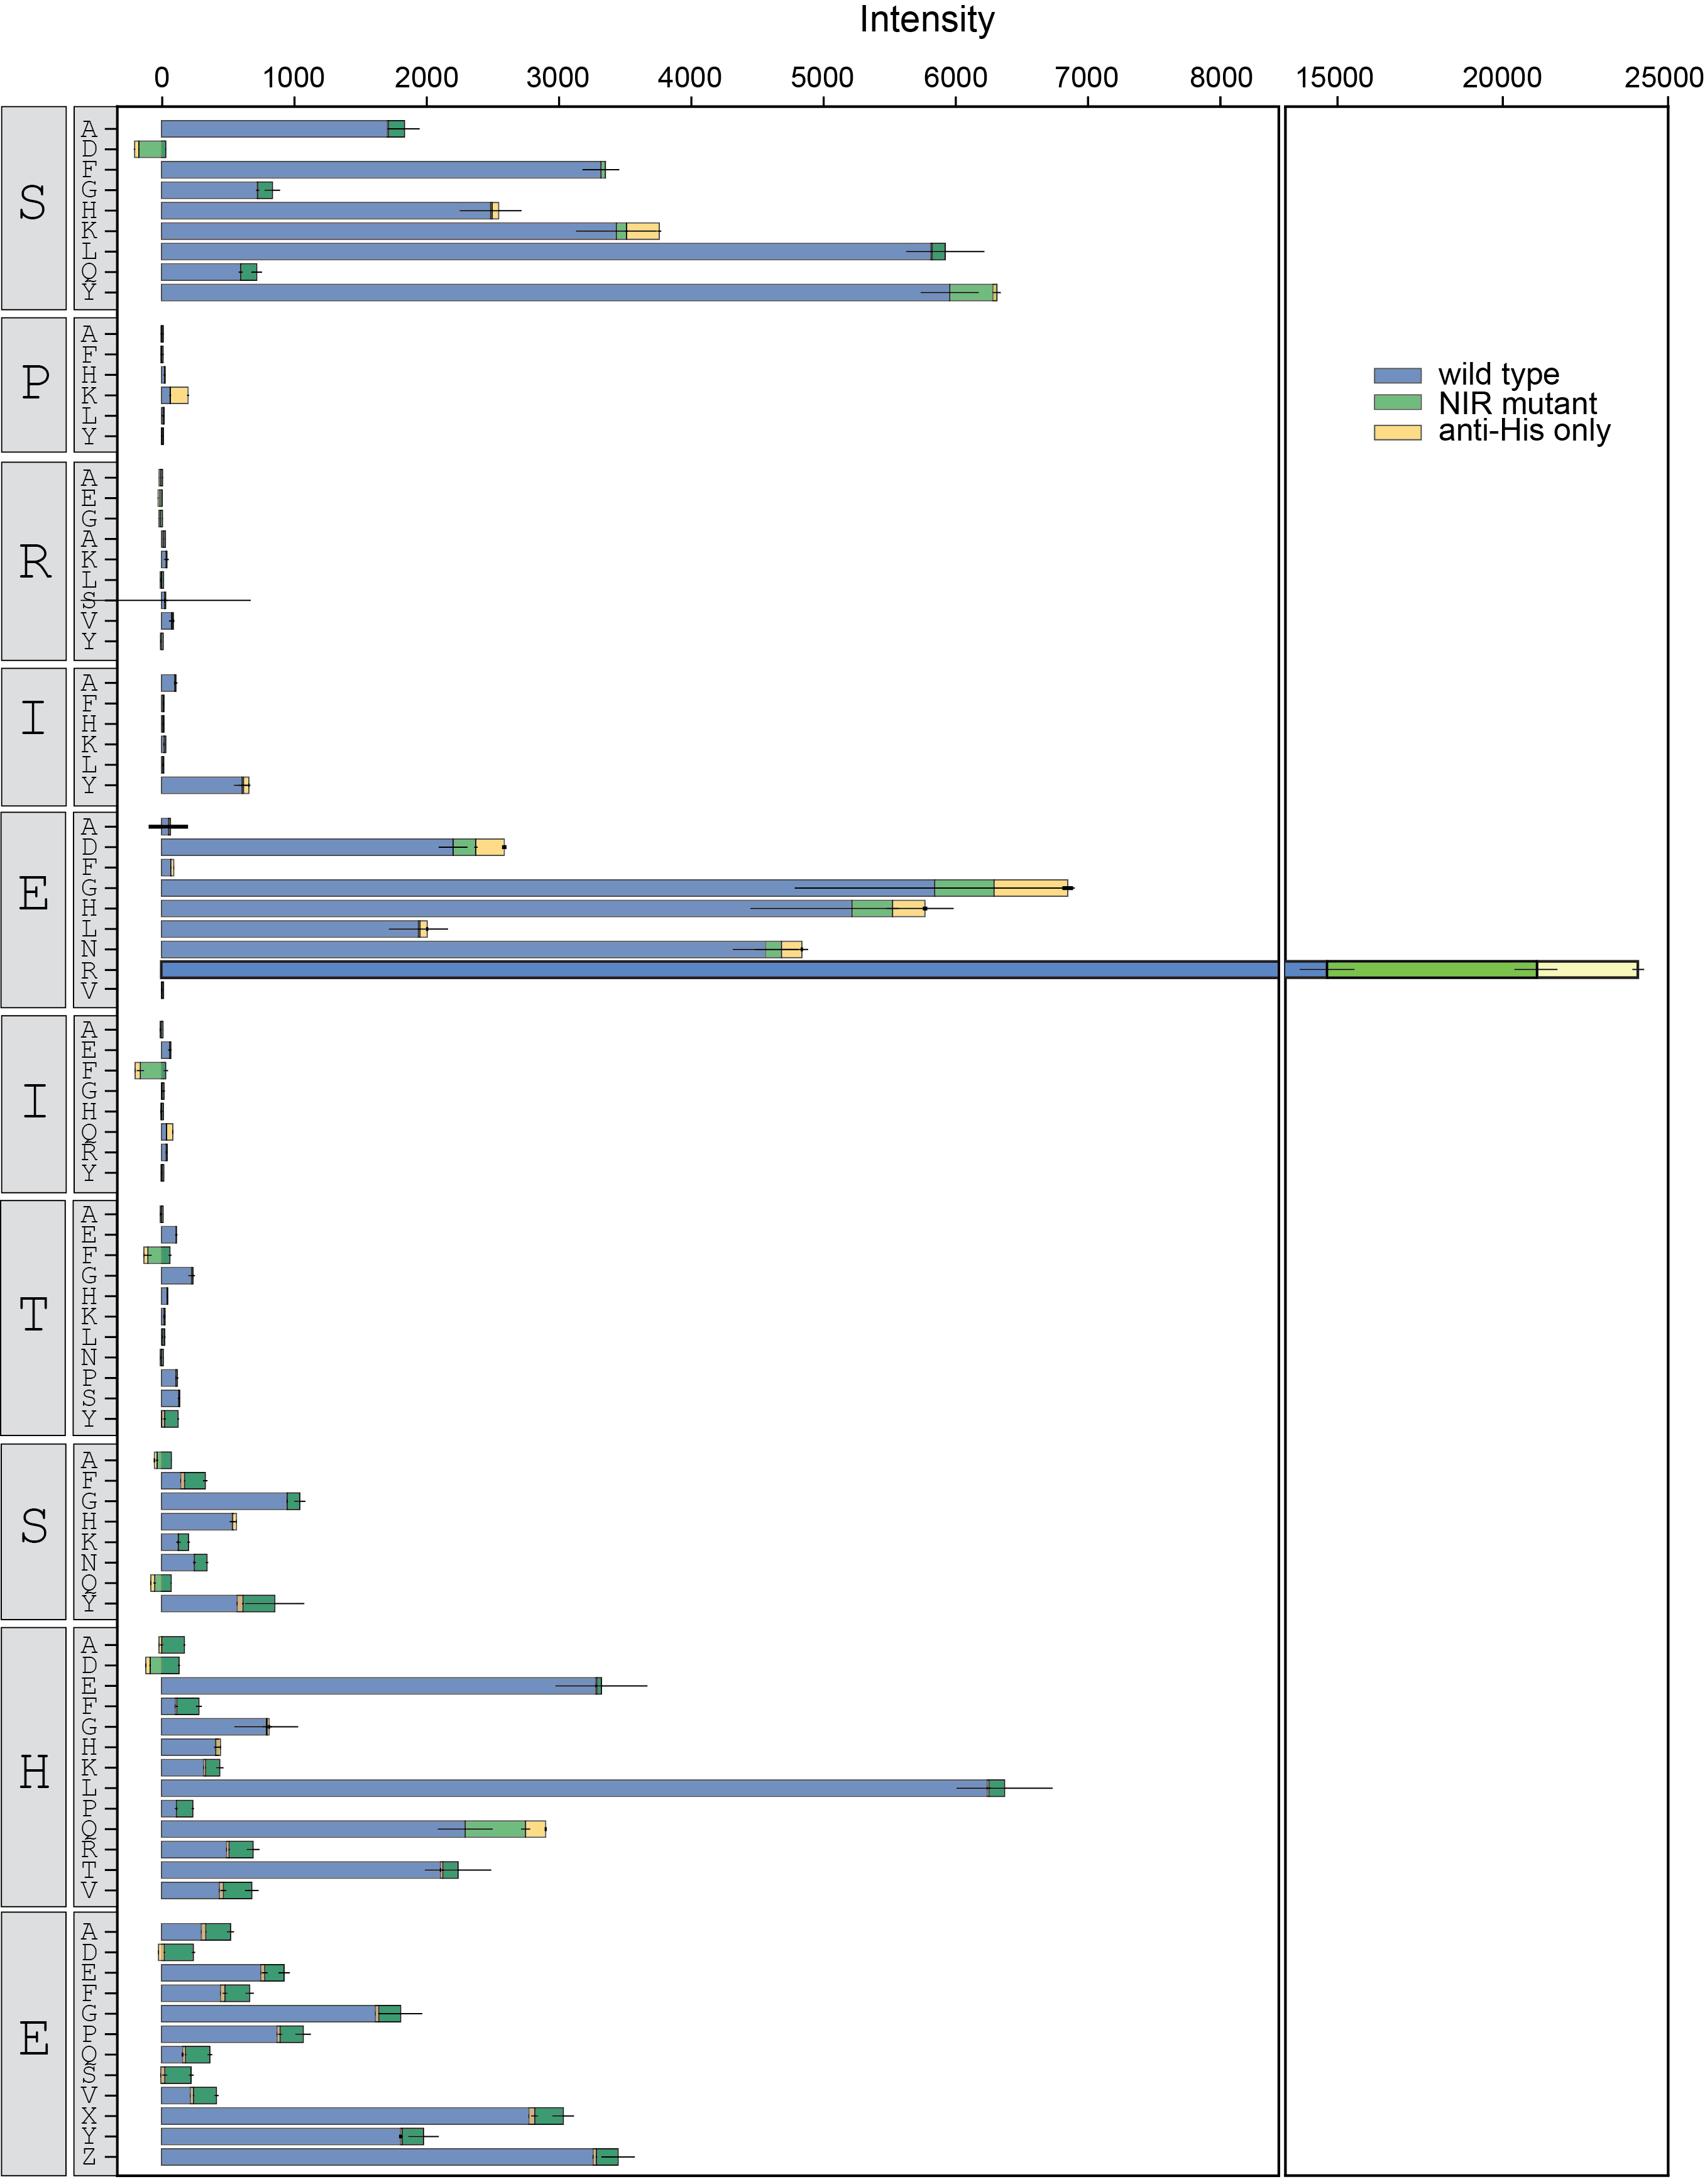

Supplement: supp [file elife-40499-supp-v1.zip › elife_poa_e40499_Figure_3_figure_supplement_11.jpg]

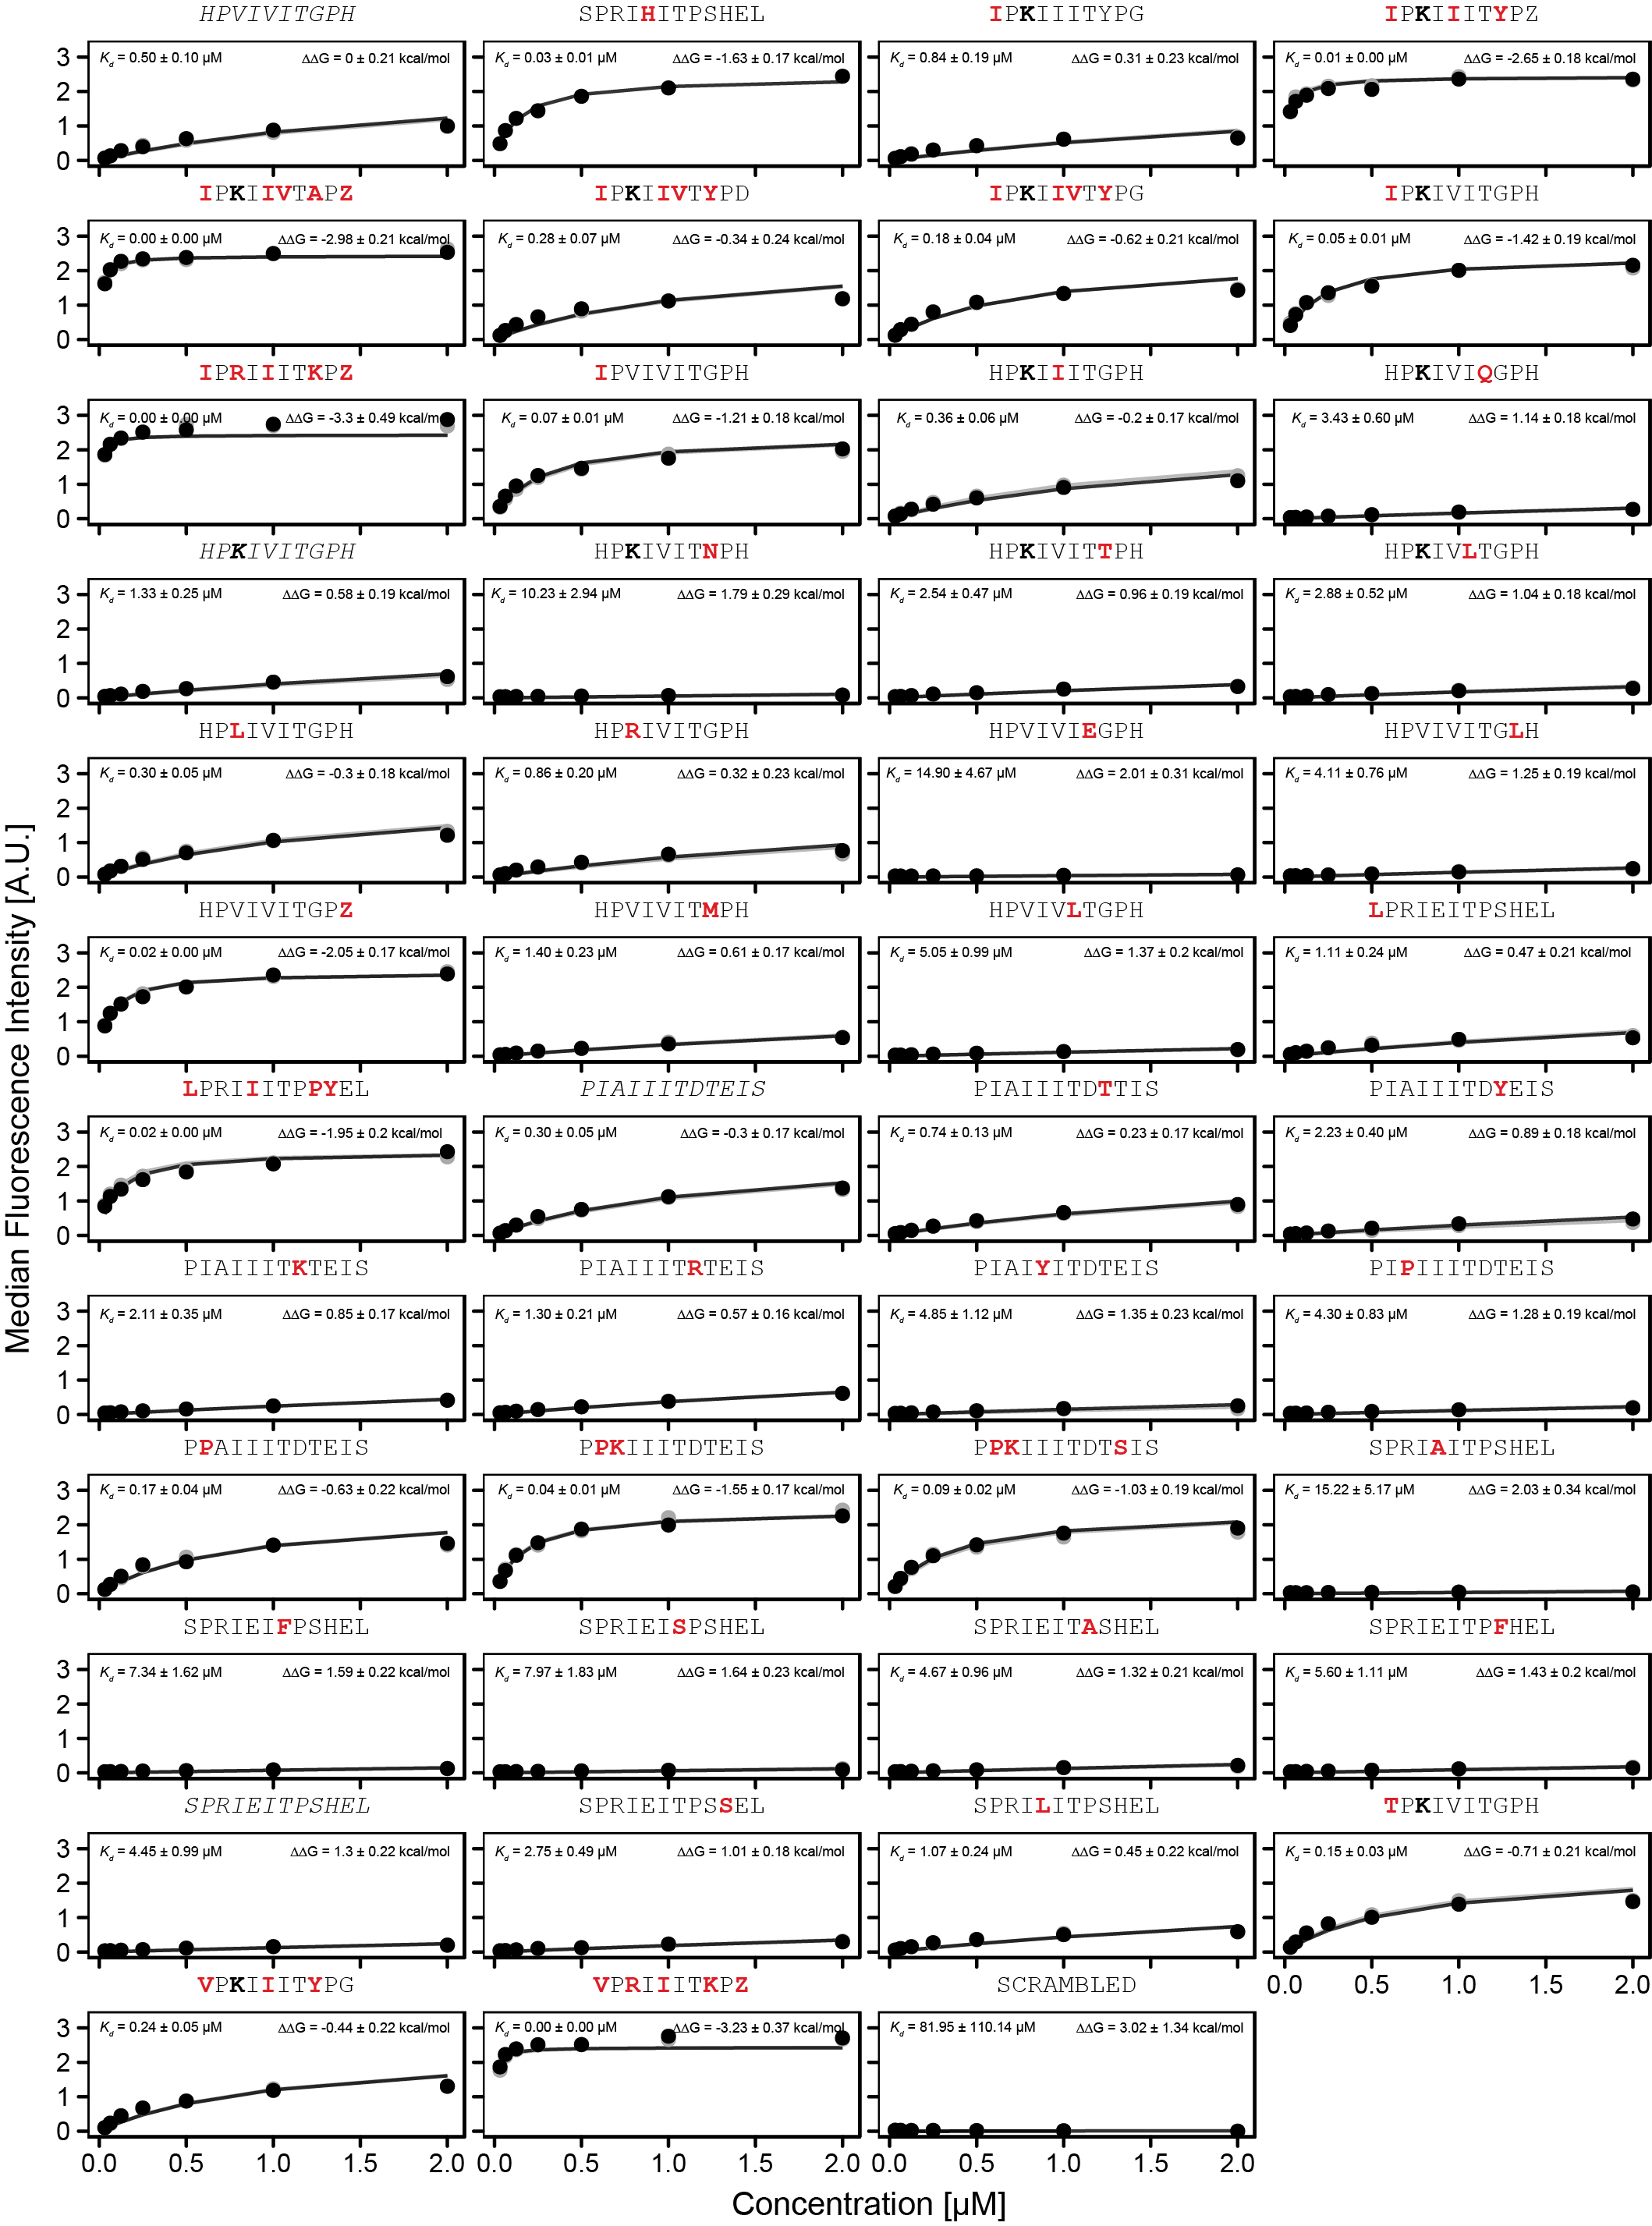

Supplement: supp [file elife-40499-supp-v1.zip › elife_poa_e40499_Figure_5_figure_supplement_6.jpg]

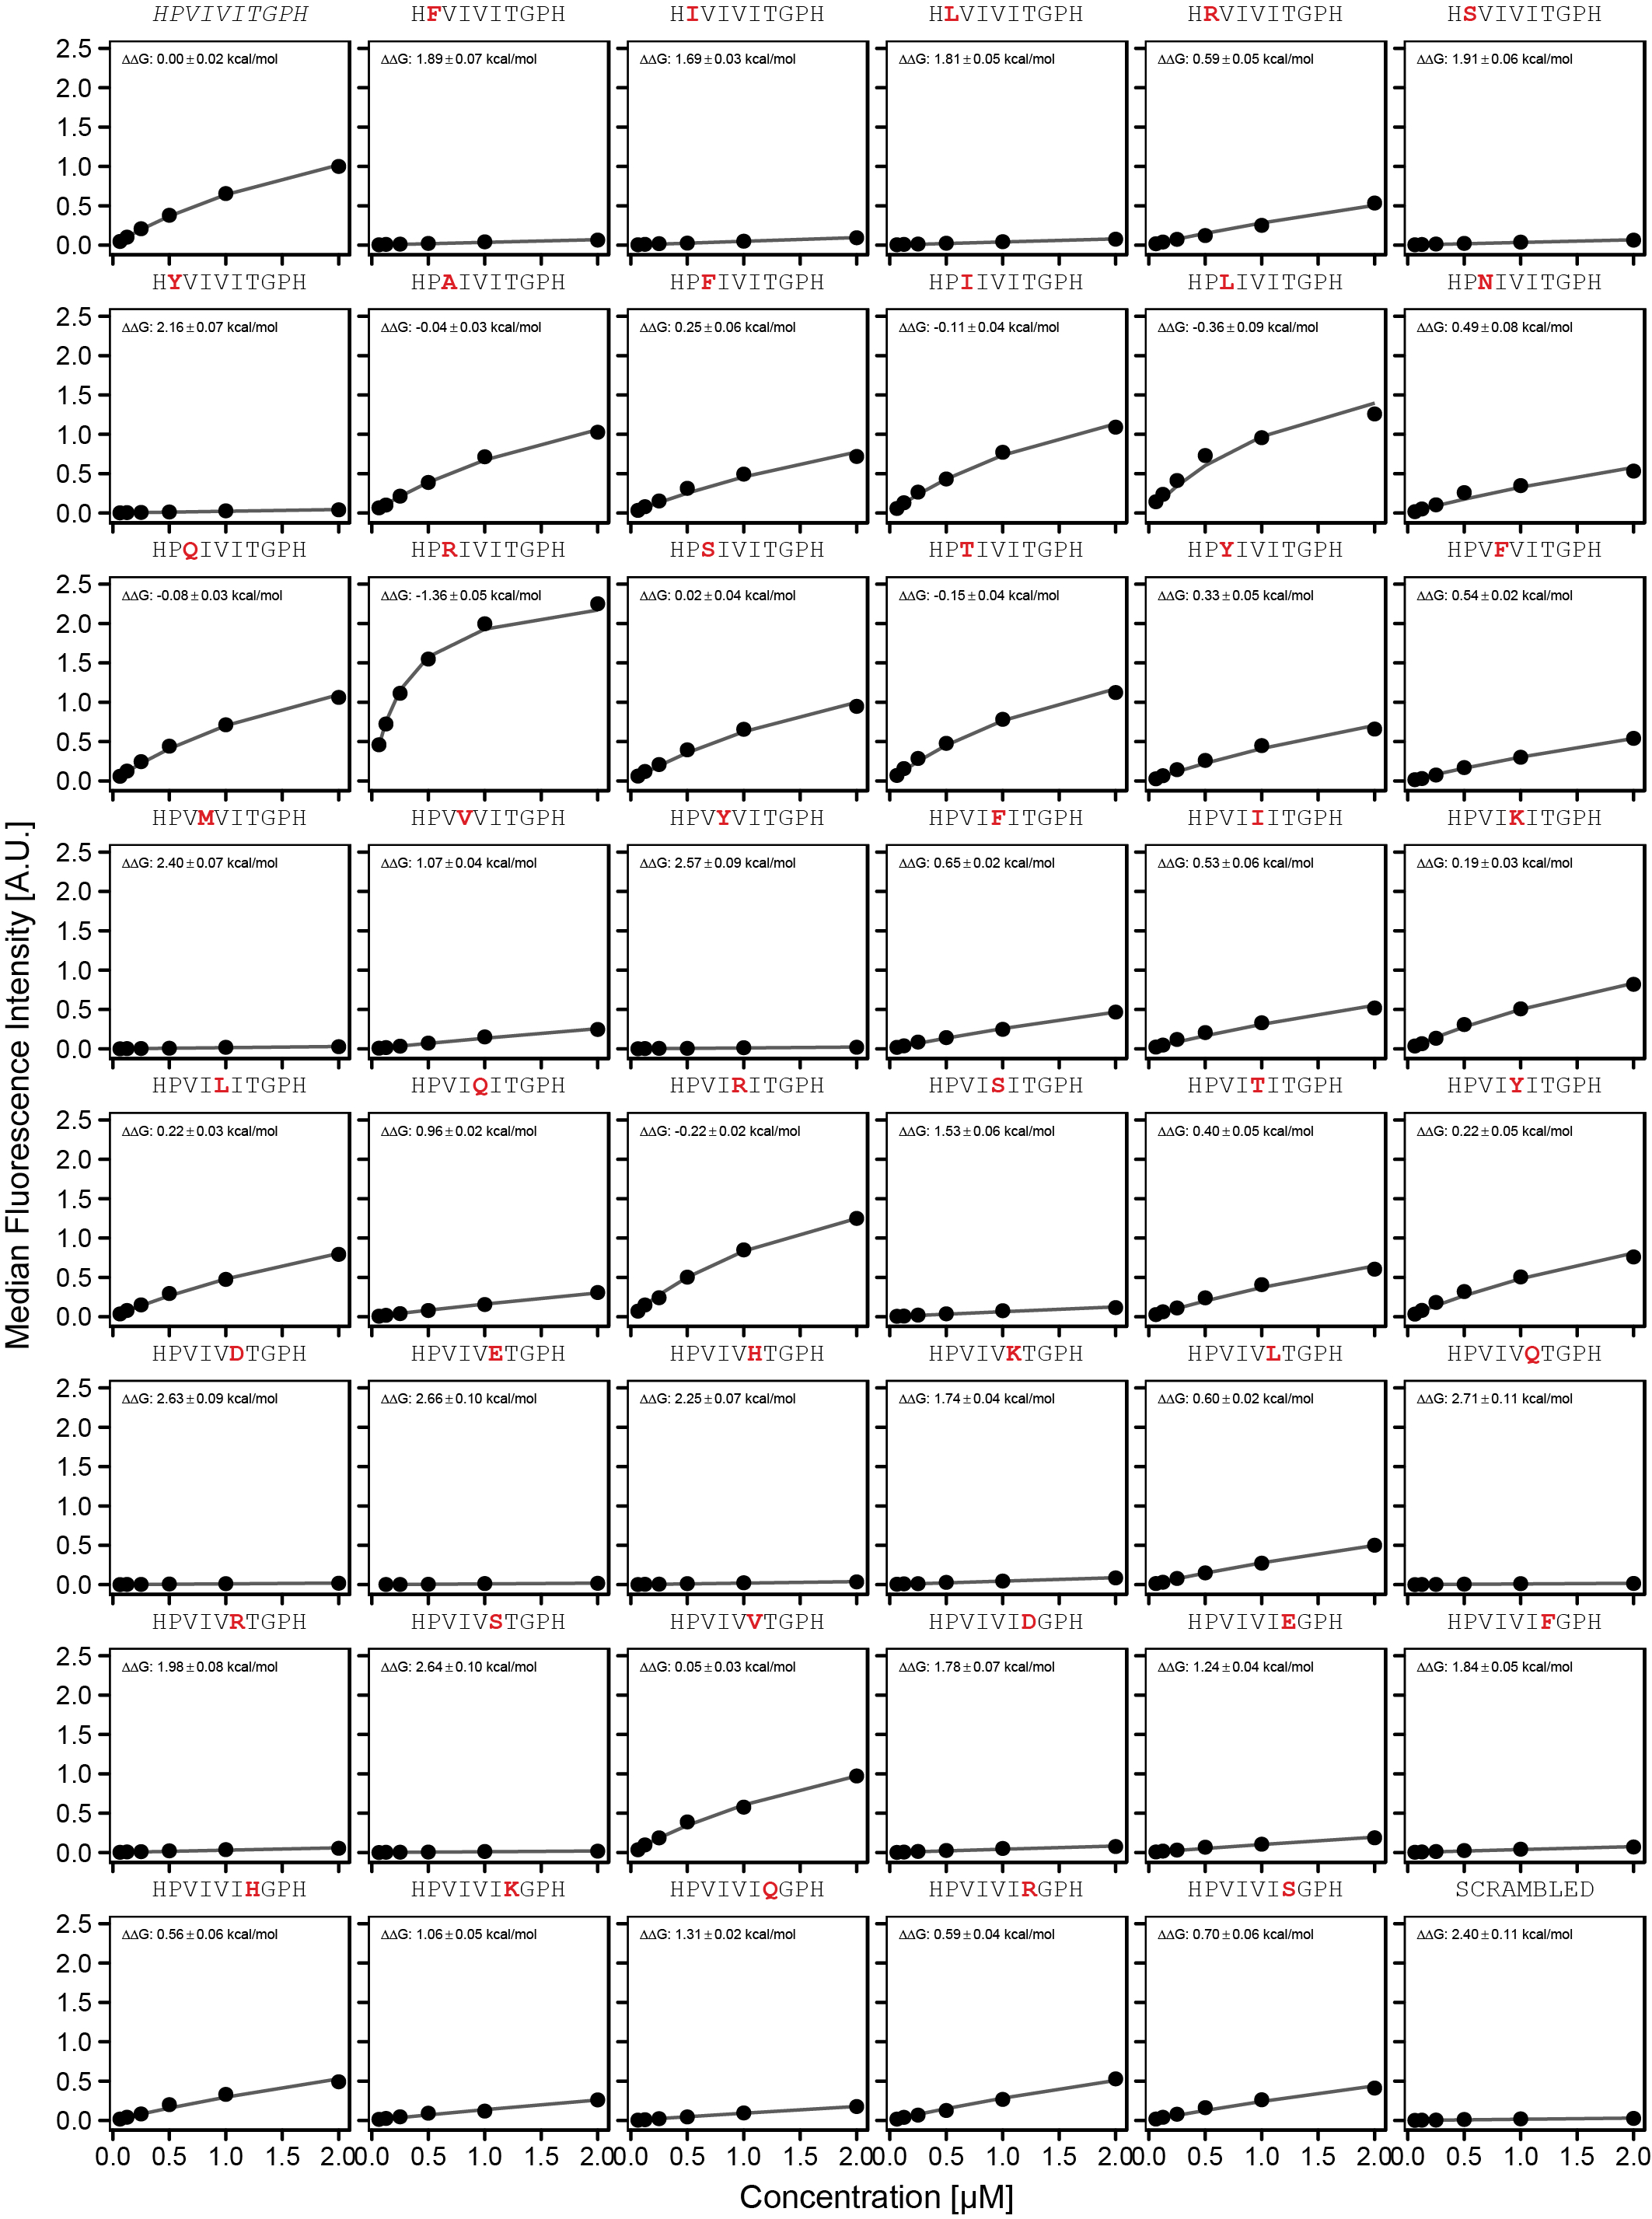

Supplement: supp [file elife-40499-supp-v1.zip › elife_poa_e40499_Figure_3_figure_supplement_1.jpg]

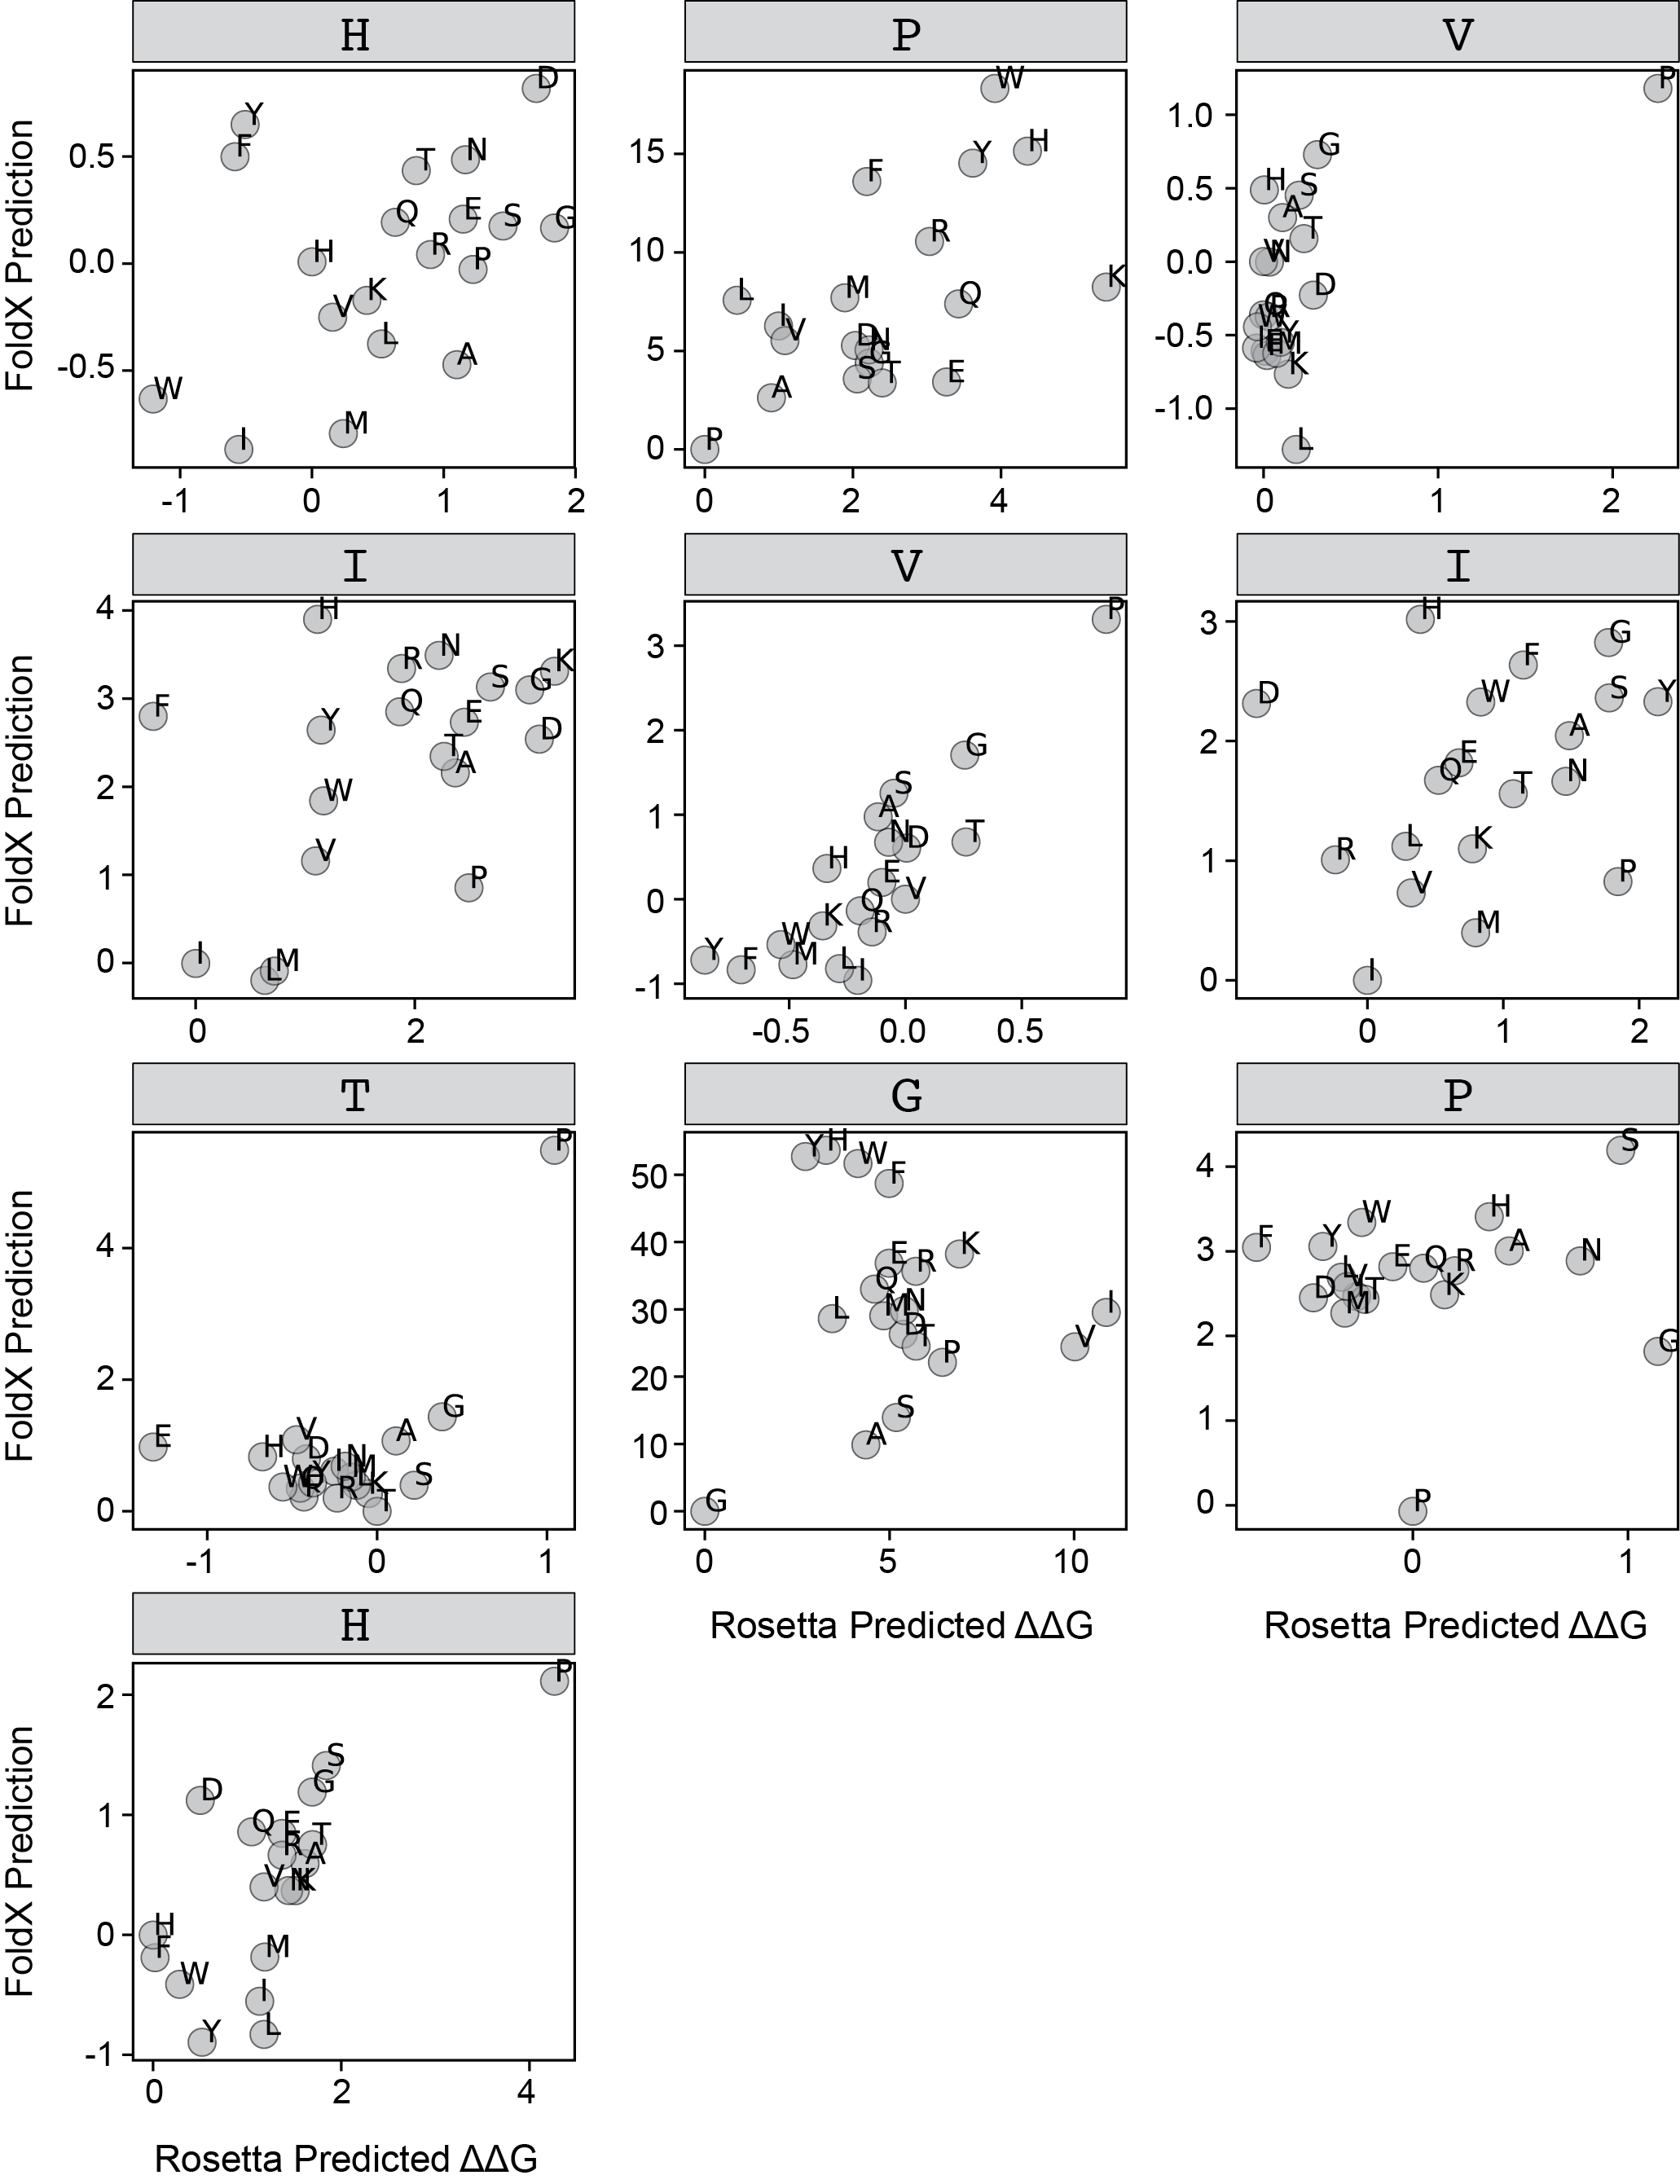

Supplement: supp [file elife-40499-supp-v1.zip › elife_poa_e40499_Figure_4_figure_supplement_2.jpg]

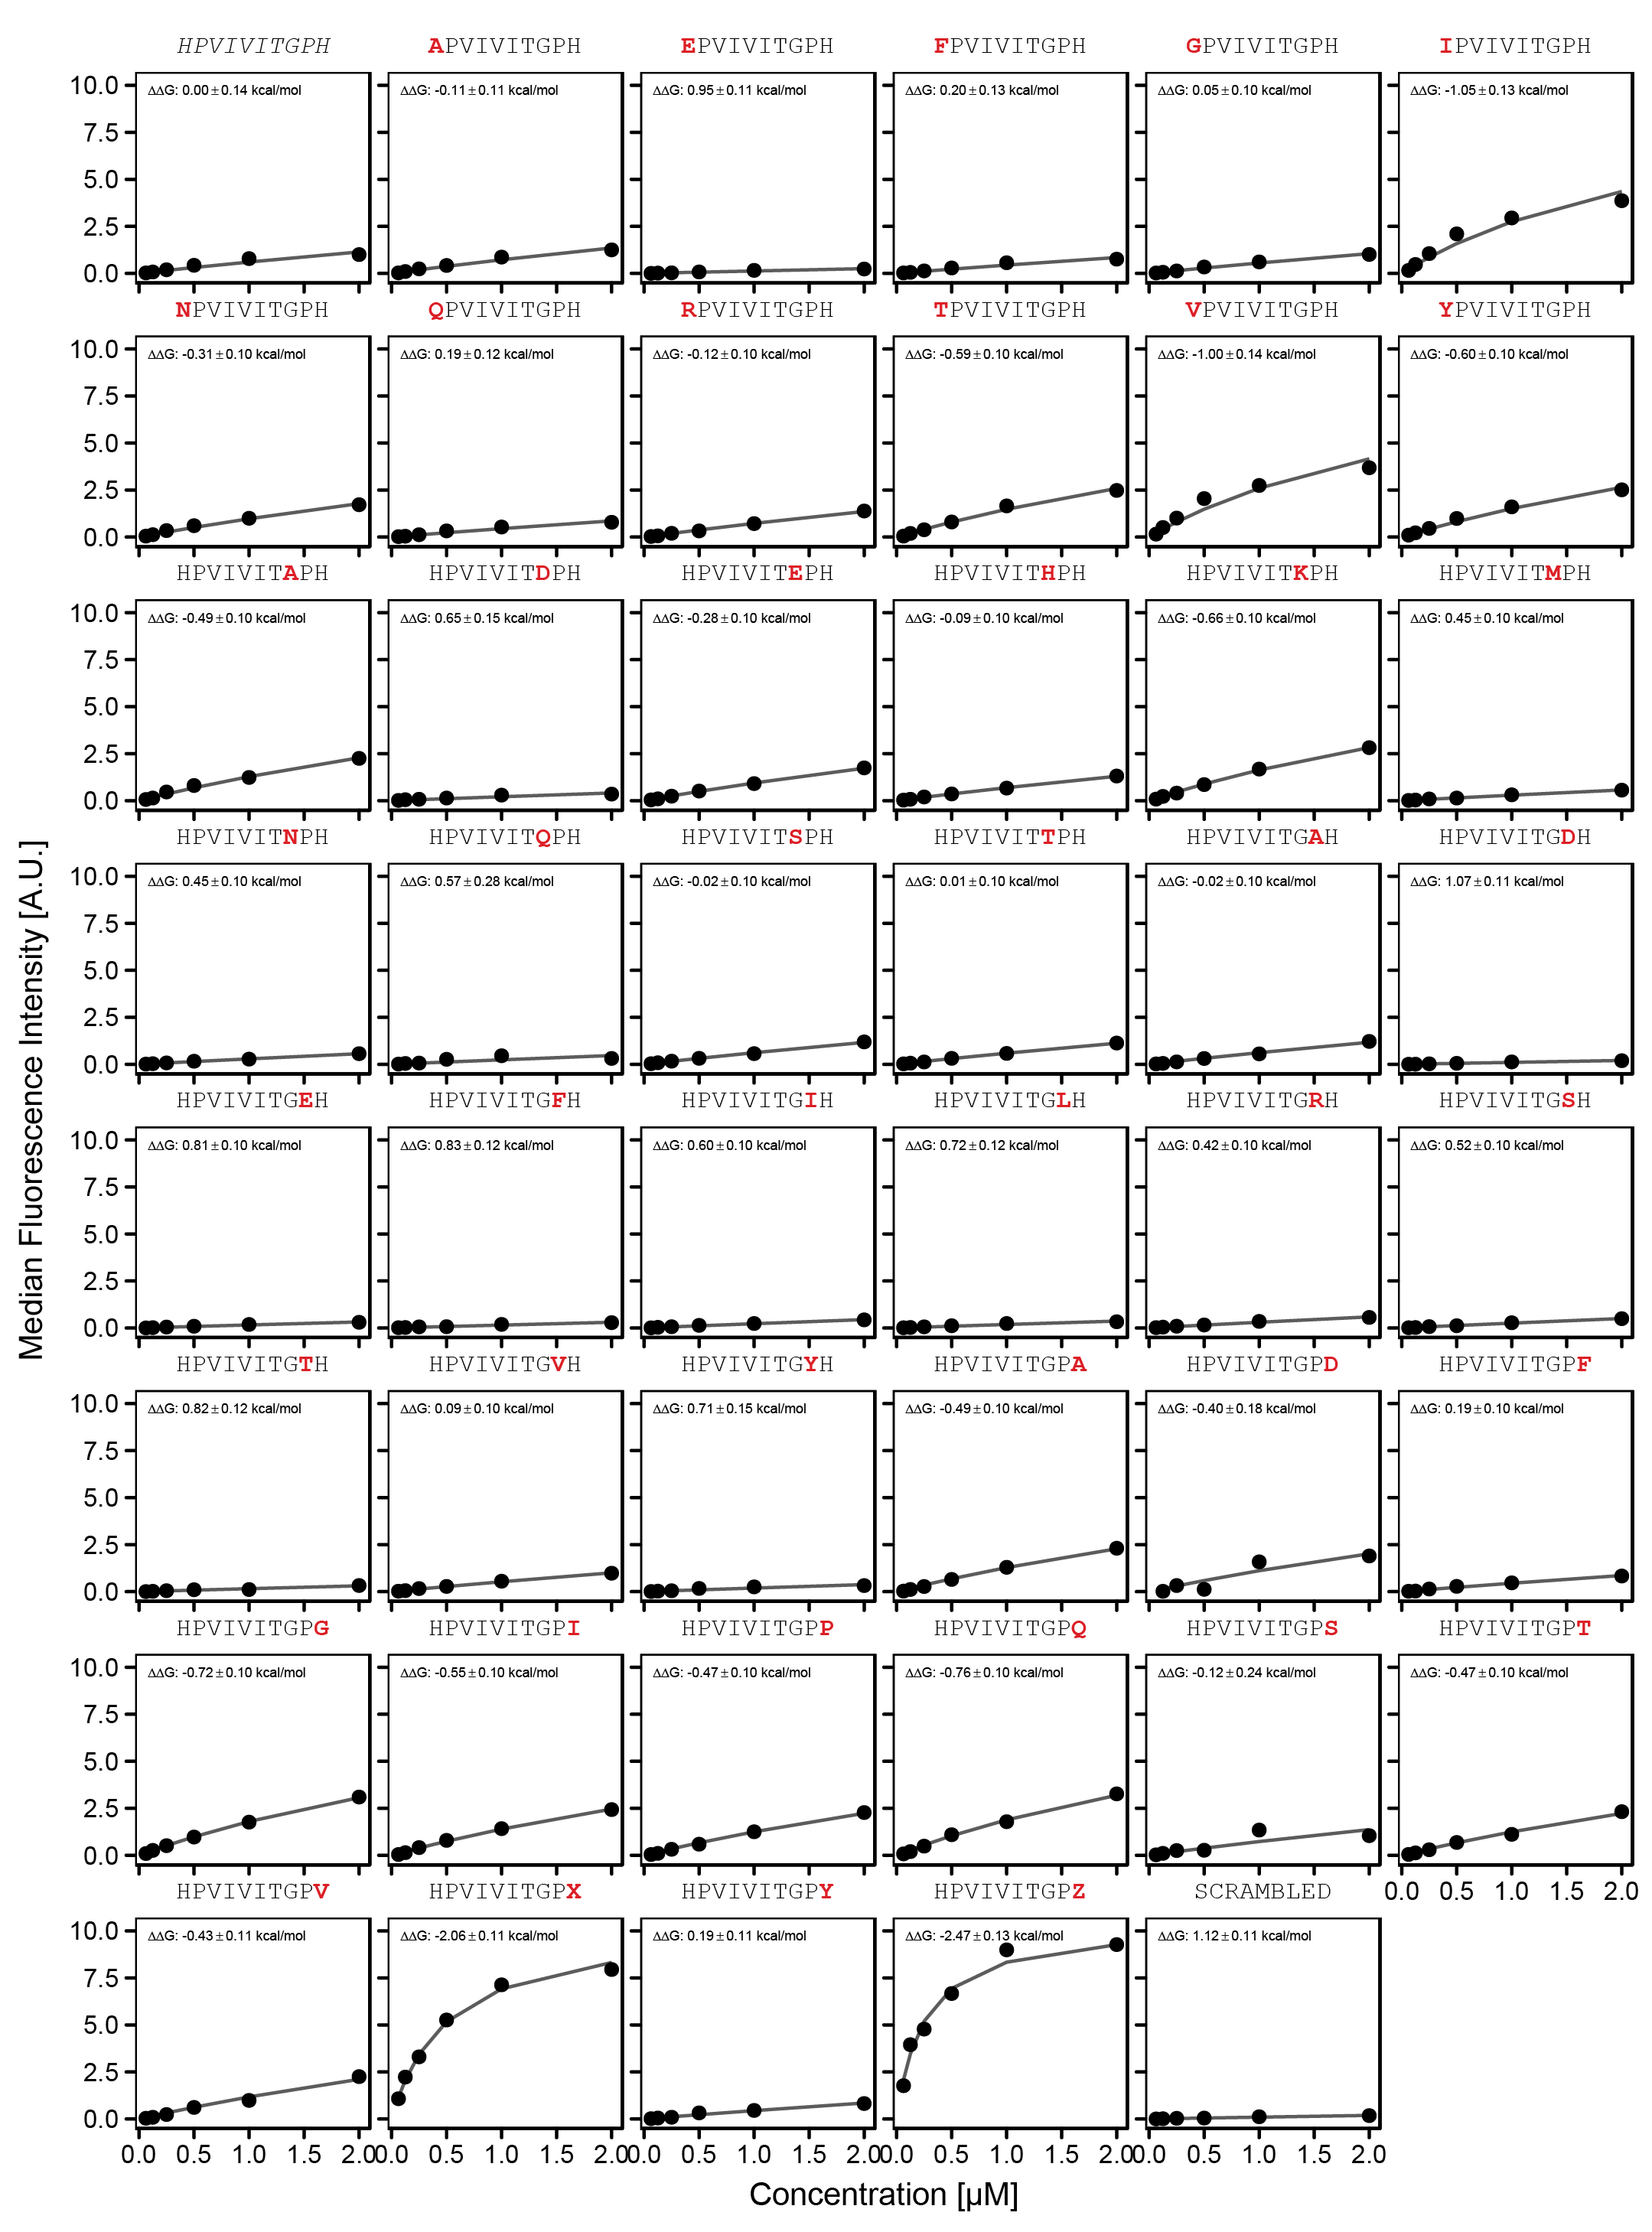

Supplement: supp [file elife-40499-supp-v1.zip › elife_poa_e40499_Figure_3_figure_supplement_2.jpg]

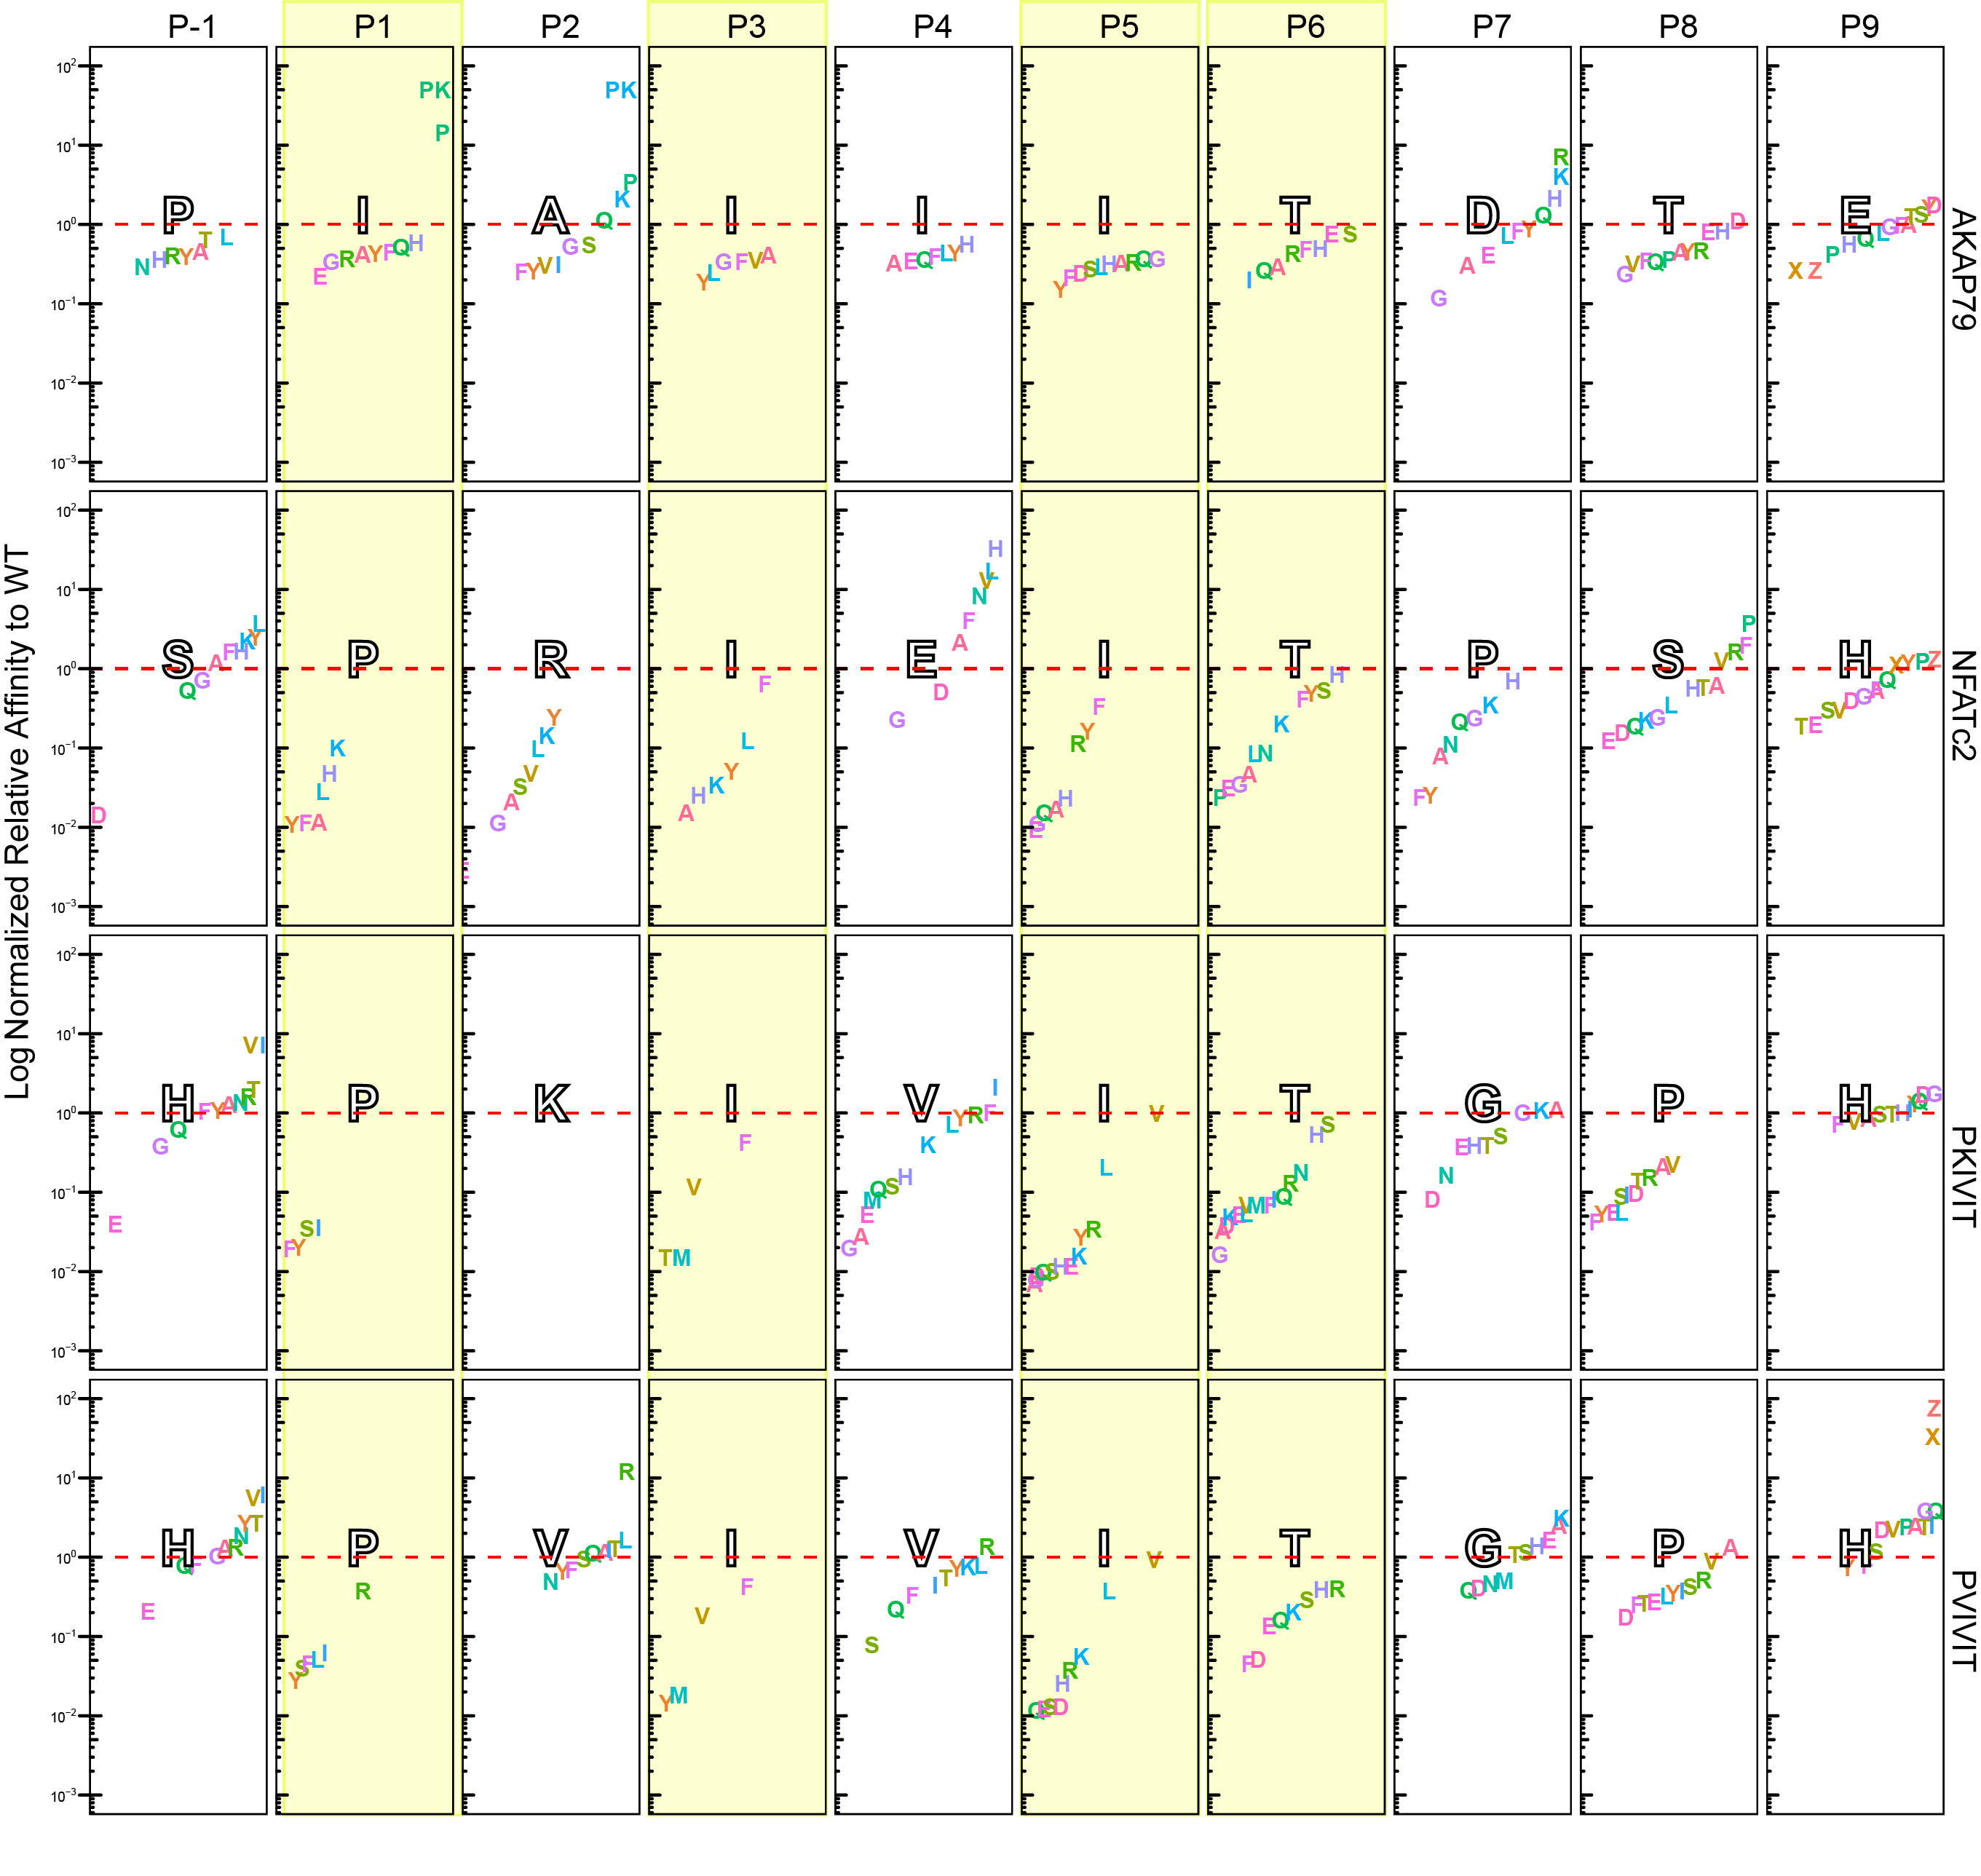

Supplement: supp [file elife-40499-supp-v1.zip › elife_poa_e40499_Figure_3_figure_supplement_21.jpg]
